# Supplementary material for: Development of Whole-Genome Agarose-Resolvable LInDel Markers in Rice
Source: Rice (N Y). 2020 Jan 6;13:1. doi: 10.1186/s12284-019-0361-3 (PMC6944724; doi:10.1186/s12284-019-0361-3)
Supplement: Supplementary file 3 — Additional file 3. The 30-55 bp LInDels between ZS97 and MH63 for markers design. [file 12284_2019_361_MOESM3_ESM.xlsx]

## Sheet: ZS97 MH63 30-55 bp LInDels
InDel NO.	Chromosome	ZS97 Position	MH63 Position	ZS97Ref	MH63Query	InDel size	ZS97 sequence	MH63 sequence
1	Chr01	63771	47425	T	TCGGCCACACATAGCGGCGACCATGCTATGTGGTTTTGGAGGCTCGCCAGCGA	52	GTTCAAGGGGAGGCTACCTACAAATCCTGACCTAACCCGTACTGATTGTAACTATGATCTATATATTAATAGTAAGTTAATATCAGATCTACACCTTAAAATATAAATTGATATGATGAGTGGAGAGAACAAAGCAGCAACATATACTAAATATCGATGACTTTGCATGTCGACACCTTATTGGGTCCTTTTATATTTGATTGATGATGATGTTTCATCTATTCCATGCCATGCCATAGAAGTAGACTAACTAGAGTACTCAACTATTTAGAGAAGGAACATTGAGTTTCTTTTGCATATCATCATGGCTTGTGTAGCTTGGTCTTAAATCAGCCATGACATGAATAACGGAAATATAATAATACTATTGAGGTAGCTCTCTTCCCTCTCTTGGTGAAA…	TCGTTCAAGGGGAGGCTACCTACAAATCCTGACCTAACCCGTACTGATTGTAACTATGATCTATATATTAATAGTAAGTTAATATCAGATCTACACCTTAAAATATAAATTGATATGATGAGTGGAGAGAACAAAGCAGCAACATATACTAAATATCGATGACTTTGCATGTCGACACCTTATTGGGTCCTTTTATATTTGATTGATGATGATGTTTCATCTATTCCATGCCATGCCATAGAAGTACTAACTAGAGTACTCAACTATTTAGAGAAGGAACATTGAGTTTCTTTTGCATATCATCATGGCTTGTGTAGCTTGGTCTTAAATCAGCCATGACATGAATAACGAAAATATAATAATACTATTGAGGTAGCTCTCTTCCCTCTCTTGGTGAAA…
2	Chr01	131161	127268	A	ATTGATGTATGTATTTATACACATAAGTATTTATAATCAATGTGTAATATTTTGAT	55	CTTAGTCGCATGCAGCAGGCTGAGAAGAAGCTTTTTATCTCGGTTCTGCTGCTTCAAGCGAGTGTCTCACCAATCGCCCGTCCTATTCTCTATTAGGATTTCTCTCTCTTCCACCTCAGATTTGGGTGACGTGGTCAGTTTTTTCGCCGGCTAACTGTGCTTCACTATACTTGCTCTAAATAAGTCAAAGCCTAAAAAATATTAATTATTCCCTCCCTCACAAGAGGAATGTACTAGGGACTAGGAGAGAGCAGCAGCATCAGCAATTAAGGAGACCGGTAGCTGTATCAGTCGTGAATTATTTTTTTTACTAGCTATCAAAGAACAGTCGTACGTGAATGTATTAACCATATATGTGATGGATTGACACACACACACAGTACTCTCTCCGTTATAAAA…	CTTAGTCGCATGCAGCAGGCTGAGAAGAAGCTTTTTATCTCGGTTCTGCTGCTTCAAGCGAGCGTCTCACCAATCGCTCGTCCTATTCTCTATTAGGATTTCTCTCTCTTCCACCTCAGATTTGGGTGACGTGGTCAGTTATTTCGCCGGCTAACTGTGCTTCACTATACTTGCTCTAAATAAGTCAAAGCCTAAAAAATATTAATTATTCCCTCCCTCACAAGAGGAATGTACTAGGGACTAGGAGAGAGCAGCAGCATCAGCAATTAAGGAGACCGGTAGCTGTATCAGTCGTGAATTATTTTTTTTACTAGCTATCAAAGAACAGTCGTACGTGAATGTATTAACCATATATGTGATGGATTGACACACACACATAGTACTCTCTCCGTTACAAAA…
3	Chr01	190822	179475	C	CACGACTCAGCCCCTCCGCCGGGTCCCTACGGCC	33	TAGCCTGTGTGTACGTCTATTTCTTCAAGCAAGGAGACTAGCTAGCTAGTTACTCCACATCTGTATCTGTATGCATGCAAAGTAAACTACTCCTATTTATTTGTAAATCTAGGACCTGTGAGTTGTGTGTCTCGTTCTCTTCGATCTCCATCCTATCACTGTGATAGCTCATGCTTGGATTGAGGGATTGATTGATTGATTTCTTCTCTGATTTTTTTGTGATTGAGCCCACTGTAACTGTAGCGATTACCGGGGGTATTATGGCCCGTGGGTACCCGCGCGGGGCCGGGGACGGGACGGGAGACCGGGGATGGGGAACCCAAGCATAAATTGGAGGCGCCGGCCATCTCTCCTCTAGACCTCCTGTCTCTAAATCTCCTCCATTCCCCCAAATCCATC…	CATGTGGGTCCTATCTTTCTCACACACATATAGCCTGTGTGTACGTCTATTTCTTCAAGCAAGGAGACTAGCTAGCTAGTTACTCCACATCTGTATCTGTACGCATGCAAAGTAAACTAGTCCTATTTATTTGTAAATCGTGTGTCTCGTTCTCGTCGATCTCCATCCTAGCACTGTGATAGCTCATGCTTGGATTGAGGGATTGATTGATTTCTTCTCTGAACTTTTTGTGATTGAGCCCACTGTAACTGTAGCGATTACCGGGGGTATTATGGGCCGTGGGTACCCGCGCGGGGCCGGGGACGGGACGGGAGACCCAATCATAAATTGGAGGCGCCGGCCATCTCTCCTCTAGACCTCCTGACTCTAATAAATCTCCTCCATTCCCCCAAATCCATC…
4	Chr01	191159	179845	T	TCCCTACTTGTTCAATTTCGCGCGCGATTCATCC	33	CGCCGGCCATCTCTCCTCTAGACCTCCTGTCTCTAAATCTCCTCCATTCCCCCAAATCCATCCATCATGGAGTTCCCTCATCGCCACCACCACCACGGCCACCGCGGCGACGACGACGACGACGATCGCCGCCGCCATCCCGCTCCCGCTCCCGCCTACGGCCAAGCGCCTCCTCCGGCTGATCCCTACGCTCGCCACCCGCCTTCCCACGACTACGCTCATCCTCCTCCGGCGTATGGGGGAGGGGGCTACGGCAACGTCGTCCACGTTTCCCACGAGGTCTCCGACCACCAGAGGCCCACGCCGCACTACGGTGGATCCGAGTACATCAGCCCCGTCCAAGAGACCCGCCCTTACCACGGTGGCGGAGGAGCCCCACCGGTGACCCACAGGATCTAC…	TAAATCTCCTCCATTCCCCCAAATCCATCCATCATGGAGTTCCCTCATCGCCACCACCACCACGGCCACCGCGGCGACGACGACGACGACGATCGCCGCCGCCATCCCGCTCCCGCTCCCGCCTACGGCCACGACTCAGCCCCTCCGCCGGGTCCCTACGGCCAAGCGCCTCCTCCGGCTGATCCCTACGCTCGCCACCCGCCTTCCCACGACTACGCTCATCCTCCTCCGGCGTATGGGGGAGGGGGCTACGGCAACGTCGTCCACGTTTCCCACGAGGTCTCCGACCACCAGAGGCCCACGCCGCACTACGGTGGATCCGAGTACATCAGCCCCGTCCAAGAGACCCGCCCTTACCACGGTGGCGGAGGAGCCCCACCGGTGACCCACAGGATCTAC…
5	Chr01	198230	186970	C	CATCCGGAACTTCCTGTCTAGTTTCCAGTTC	30	TACACTACAAGCCCAGCCGTTGCCCACGCTGGCTTGTGGTTGAAAGTGCATTAATTCCCCTAGTGGGTTTTGGTGATTAATGACAAATGTGGTTAAGGGACTAATGAGTTCATTGAGTTACTTTCAGGTGTATTAGTCCAAGGTGTGGAAGATGGATGCTTGGAGACCCCCCCCCCCCAAAGTATAAAATCAAAGCGGACCGGAACTCGAGAAGTGCATAGGATAGTTTATTTATTGCAATCGAGTTTTTAGGAAAAACCGTACTATTAAGATGGGTTCCAGGTGATACTCTTAGATATGTCAAGTGCTCTTAGTGTGAACCAAGTGTCAAGTTTCCCTAGGAGTTATTTTTGCAAATACTCAATATGTCCAAAAATGCAAGTCCGGAACTTCCTGTCT…	AAGCTATACTACAAGCCCAGCCGTTGCCCACGCTGGCTTGTGGTTGAAAGTGCATTAATTCCCCTAGTGGGTTTTGGTGATTAATGACAAATGTGGTTAAGGGACTAATGAGTTCATTGAGTTACTTTCAGGTGTATTAGTCCAAGGTGTGGAAGATGGATGCTTGGAGACCCCCCCAAAAGTATAAAATCAAAGCGGACCGGAACTCGAGAAGTGCATAGGATAGTTTATTTATTGCAATCGAGTTTTTAGGAAAAACCGTACTATTAAGAGGGGTTCCAGGTGATACTCTTAGATATGTCAAGTGCTCTTAGTGTGAACCAAGTGTCAAGTTTCCCTAGGAGTTATTTTTGCAAATACTCAATATGTCCAAAAATGCAAGTCCGGAACTTCCTGTCT…
6	Chr01	204478	192975	CATGGCAAAATGTGTAAATTAATTAATATGG	C	30	TGTATAATTTTTTTTTAATAATGAAGCATATGTATAAGTATATATATACATGCATGTATGGCCGGCGCATGCAATGGCAACGTGATGGGTTCGATCAAATTAAAATGAAGACAAATTAGTTAATTAGAAATGCTAGTTAATTAATTAACTATATGCCATGCATGGCTGCAGAAATCAAGTGATACGAGAGATGGCTGCAAATACAGATCGAAGCATGTGTCCCTAGCTTGCGATCGCTAGCAAAATGGTAACCAGCCGCGTTATGGTTAATTTCAAGCTAGGATCATCGATCACCCTGAAGCAGCTAGATTATTTTACCAGTGATAATATTTCTTCATCGCTTGCATGCATATGCATGAGCAGCGTGATCAATCTACATCCACTTAATTGAAGCCATAA…	ATGTATATATTTTTTTTAATAATGAAGCATATGTATAAGTATATATACATGCATGTATGGCCGGCGCATGCAATGGCAACGTGATGGGTTCGATCAAATTAAAATGAAGACAAATTAGTTAATTAGAAATGCTAGTTAATTAATTAACTATATGCCATGCATGGCTGCAGAAATCAAGTGAGACGAGAGATGGCTGCAAATACAGATCGAAGCATGTGTCCCCTAGCTTGCGATCGCTAGCAAAATGGTAACCAGCCGCGTTATGGTTAATTTCAAGCTAGGATCATCGATCACCCTGCAGCAGCTAGATTATTTTACCAGTGATAATATTTCTTCATCGCTTGCATGCATATGCATGAGCAGCGTGATCAATCTACATCCACTTAATTGAAGCCATAA…
7	Chr01	282006	254643	G	GGTCGTCGATCGATCGATCGATGTCGGCCGGAAGCTT	36	CAATTACCGAGATCACAAAGAGGTCCCTTTTCTGAGGAAAAGGACCGGAACTACTGCTATCTCTCGTCCCTTTATTTCAAAAGCTACATAAAGTATATACTACTAGTTGGAAGCCCAAAAGATCAGATAATACTCTCGCTAATTATTTAGGCCATCTTGATCTTCTCCTACAATGTCACACACCCTACAGATCTCTAATTAATTAAATTGCGTACCCTAGCTAGCTAGTACTATTTCACTTACCAGGCAGGCATGTAATGAACGTGGACGTCATCCAAAATTAAACGAGAGTACGCCCAAGGATAATGATCTAGCTATGTAAGGATCGATATATAAGAGGACACCGAGAGAGTCCCGAAGTTCGCCATGCATCCGGTTGCATGCTGCTCAAGTTGAGCA…	GGATAAGTAATTTTACTTATCATCCATTTAAACATACTACTAGTAAACAAGCGATTCATTAATATTTATATTTCTCAATGCTCATGTAACCAATCATGTGTGGAACAATGAAGAGTCACGCATTAAATCCGAGAAAGTCATTAAGATGATAGGTTGTTGGATTGAAATATGCCTATCAAAAATAAAATTTTCAGATTTGGAAATATGACTATCAAAAGTAGATGGAGGGAGTATTTCACTTACCAGGCAGGCATGTAATGAACGTGGACGTCATCCAAAATTAAACGAGAGTACGCCCAAGGATAATGATCTAGCTATGTAAGGATCGATATATAAGAGGACACCGAGAGAGTCCCGAAGTTCGCCATGCATCCGGTTGCATGCTGCTCAAGTTGAGCA…
8	Chr01	292676	265299	CTAGGCTAGGAATATTATGTTTGTGTACGTCC	C	31	GCTGGGATCGAACGGTACCAAATTTACAGCAAATTTTTAACTTAAGTAGCATGTTGTATGGAGGATAGGAGGAGTCAGCAAGACCCACAATAAAAGGTGCTGAATGTTTGGGGCAAGATCATCCAAAGTAGTAGCTTTTGTGTCTACTTTTTCTTTTGTGGAGCACATAGGTGACAAGGGCACAACAACTGCTGAAATAAGATAGTAATGTTTTTGAGCCGGCTACTTGATCTAGGAGTATCTTTGCAACGAAAAGTCAATGATTCAGTGGTTCGTCAGCATAAGCTTTTTGCCTAGTACTATGAGATAATGTCAAATGACATGGCTGATTGATAGACCAATCAGTGTGAGCGAGCAACATGAAAGATGTTTTGAAACCGCGTTTGACAGTTGAGGCAA…	GCTGGGATCGAACGGTACCAAATTTACAGCAAATTTTTAACTTAAGTAGCATGTTGTATGGAGGATAGGAGGAGTCAGCAAGACCCACAATAAAAGGTGCTGAATGTTTGGGGCAAGATCATCCAAAGTAGTAGCTTTTGTGTCTACTTTTTCTTTTGTGGAGCACATAGGTGACAAGGGCACAACAACTGCTGAAATAAGATAGTAATGTTTTTGAGCCGGCTACTTGATCTAGGAGTATCTTTGCAACGAAAAGTCAATGATTCAGTGGTTCGTCAGCATAAGCTTTTTGCCTAGTACTATGAGATAATGTCAAATGACATGGCTGATTGATAGACCAATCAGTGTGAGCGAGCAACATGAAAGATGTTTTGAAACCGCGTTTGACAGTTGAGGCAA…
9	Chr01	309685	280305	AGGATGCATCATATTTAGTCTTAGAATCGTTTTTTTTTTCTTTT	A	43	AGCTACCCGGAAGATCCCTGGTCGTTTCTCCATATCATACTAATAATGTTTAAGCAAATAAATTCATTAACATGCAAATCAAGCCCTGAAGAAGAGCTGAACTGAGCACAGTGATCCATGACAGATTAAACCAAGACACTCACTCTCACCGACGGTGTGAAATTTGCAGGAACATGTACATTACTAAGGAAGAGACTTAATTATTTTATTGGCACATACACATATACTAAAAGATGATGGATGTATCGATGTATTTCAGAGGAGCCTGTTGAGGTAGTCATCGACGGTGGTGTACTGGACGTCCGGGAAGAGCTGGGTGGCCTCAACGGCGGTGGCTGGATCCAACGGCGTCGTCGTCTCCCCCCTTATGTACCCTGCGTGCGCGATCGACAGCACGAT…	CCACCTTGTGAAGCTACCCGGAAGATCCCTGGTTGTTTCTCCATATCATACTAATAATGTTTAAGCAAATAAATTCATTAACATGCAAATCAAGCCCTGAAGAAGAGCTGAACTGAGCACAGTGATCCATGACAGATTAAACCAAGACACTCACTCTCACCGACGGTGTGAAATTTGCAGGAACATGTACATTACTAAGGAAGAGACTTAATTATTTTATTGGCACATAAAAGATGATGGATGTATCGATGTATTTCAGAGGAGCCTGTTGAGGTAGTCATCGACGGTGGTGTACTGGACGTCCGGGAAGAGCTGGGTGGCCTCAACGGCGGTGGCTGGATCCAACGGCGTCGTCGTCTCCCCCCTTATGTACCCTGCGTGCGCGATCGACAGCACGAT…
10	Chr01	312482	283036	GTCACTGATTCTTCTCCGTTTTTCATCTGCAAAG	G	33	GGATCAAGCTTGGGCAATAGTCAGCTAACAGATAGTGAATTTCCTAATTAGCGCAACATACCTATCTTACATAACCATGCAACCAAGCAACCCATGTAGTTTTCTCAGTTGCAGATAAGCCACAAAAGAAGGGGGCTGGGGCTCTCTCCCAGATTCAGATAAAGAGGAGGAAGAAGAGGGTCTCCAGTCTTTATTTTATAAGATGACATAGATAGAGCCACCTTCGATCCATTCCATCGATAAATCCTTTGGAATGAAGGAGGGGGTTGTGCAGTTTTACCTTTTGAAGGGCTGATCTACTCCATTTCATCCTATCTTTATATGGGTGCATGAATCAAGCAACTTGGCAGCTGTCGTGGTTGTACCTGATGGTGGTCAGGGTAGGACCGAGCTTAGGTA…	GGATCAAGCTTGGGCAATAGTCAGCTAACAGATAGTGAATTTCCTAATTAGCGCAACATACCTATCTTACATAACCATGCAACCAAGCAACCCATGTAGTTTTCTCAGTTGCAGATAAGCCACAAAAGAAGGGGGCTGGGGCTCTCTCCCAGATTCAGATAAAGAGGAGGAAGAAGAGGGTCTCCAGTCTTTATTTTATAAGATGACATAGATAGAGCCACCTTCGATCCATTCAATCGATAAATCCTTTGGAATGAAGGAGGGGGTTGTGCAGTTTTACCTTTTGAAGGGCTGATCTACTCCATTTCATCCTATCTTTATATGGGTGCATGAATCAAGCAACTTGGCAGCTGTCGTGGTTGTACCTGATGGTGGTCAGGGTAGGACCGAGCTTAGGTA…
11	Chr01	357588	328140	G	GACAGTGCAAGAACAGGTACCTTACCTTCTG	30	CTATGCATGGAGCTGGCACGGCAGTAGTGTACAATGCTACTGTAATTTTGTATTGCTACAAGTACTAGACAGGTACAGGGCTGAGGCCAGTGGATGGCTGTAGGCTGGCAGCATACTCCCTCGCCCACAGATCATAATGTATGATCTCCTCCAGTGATGGCCTTGTTACTAGCTCATTCCGATGAGCGTCGCATGTCAGCTCCACCACCTTGAAAATGTCCAGGTACCCGATCCTGCAAAAACATAACCACAATCATCTATTCATTTGCTTATATATATGTAAAGTTTATCTGACGGGAAAATGTCTACTTGCAAAGAAATAGCCGCGGAAACATTAATTCACCAGTTTAAATAACTTGCAATGAAGTTGTCAGCCATTCACCATTTAGAAAACAATTC…	ATGCATGGAGCTGGCACGGCAGTAGTGTACAATGCTACTGTAATTTTGTATTGCTACAAGTACTAGACAGGTACAGGGCTGAGGCCAGTGGATGGCTGTAGGCTGGCAGCATACTCCCTCGCCCACAGATCATAATGTATGATCTCCTCCAGTGATGGCCTTGTTACTAGCTCATTCCGATGAGCGTCGCATGTCAGCTCCACCACCTTGAAGATGTCCAGGTACCCGATCCTGCAAAAACATAACCACAATCATCTATTCATTTGCTTATATATATGTAAAGTTTATCTGACGGGAAAATGTCTACTTGCAAAGAAATAGCCGCGGAAACATTAATTCACCAGTTTAAATAACTTGCAATGAAGTTTTGTCAGCCATTCACCATTTAGAAAACAATTC…
12	Chr01	368992	339623	TTATATATATATATATATATATATATAATATATATATATATATATATTATATA	T	52	TCCAAGTCTGAAGAAAAGCGTCATCTTGATCCAAAGGATTGGACGGGGAGCGCCACGATTTTCGGAGGATATGAGACAGTAAGAGAGGGGAAGAAAAACCTGACCTTGCGGCGAGGGAGTGGAAGATTGGGCGGCCATCGGGGTAGCTCAGGAGCGCACGAATCAAGAAAGAGATTTCAGGCGGCGGCGGCGGCCGCGAGTCGTCGGAGGAAAGAAGCAGCGATGAGCATGTGCGATATTCACATGTACTTTATCTGCACGCGGAGGGTGTTTATTTTGTTTCCTCCAAGAAAACGAAACGAAACGTGTCGCTTCGCTCACACACAATTTCATCAAAGCAATCCCCTTCTCTTCTTCTCTCTGTGTAGCCATGGATAACTGTGGTGAGGACTGATGGTC…	GCGCCAAGATTCCAAGTCTGAAGAAAAGCGTCATCTTGATCCAAAGGATTGGACGGGGAGCGCCACGATTTTCGGAGGATATGAGACAGTAAGAGAGGGGAAGAAAAACCTGACCTTGCGGCGAGGGAGTGGAAGATTGGGCGGCCATCGGGGTAGCTCAGGAGCGCACGAATCAAGAAAGAGATTTCAGGCGGCGGCGAGTCGTCGGAGGAAAGAAGCAGCGATGAGCATGTGCGATATTCACATGTACTTTATCTGCACGCGGAGGGTGTTTATTTTGTTTCCTCCAAGAAAACGAAACGAAACGTGTCGCTTCGCTCACACACAATTTCATCAAAGCAATCCCCTTCTCTTCTTCTCTCTGTGTTGCCATGGATAACTGTGGTGAGGACTGATGGT…
13	Chr01	387708	361891	AAAGATACGCTCCTAGCGTATTCTCTAAAAAAACA	A	34	TCCTTTTGACTAGGGTATCTACCCGTATTCTCTCTTTTTCTACATAAATGATTAATGATGTATGCATATGTAAGCACCGTACGTGATTTTTCCTGAAACAATCAAGGGATAGAAAAGAAAAACATGTGATACAAATCTCCTCATTTCATTGCATTTCATGGCCTTCTATCTTCAGATAAATCTGAACACTGAGCAACAAAGGTGACTTTCAGTTACTTGATTCTTACTCTCTTGCAGATTATATATGTCATACTGAGATTACTCGTCAATGGATTGCTGCTTTGATTTTGTTTATGGACAAGGGATTTTGAAGAGAGGAAAAATTCAGTTGTAAGTGAGGACTGAGGATCAATATGCCATCAGTGAGAACCTCTAACTCGTTGAGAGAAAGCAATTGCA…	TCCTTTTGACTAGGGTATCTACCCGTATTCTCTCTTTTTTCTACATAAATGATTAATGATGTATGCATATGTAAGCACTGCACGTGATTTTTCCTGAAACAATCAAGGGATAGAAAAGAAAAACATGTGATACAAATCTCCTCATTCCATTGCATTTCATGGCATTCTATCTTCAGATAAATCTGAACACTGAGCAACAAGGTGACTTTCAGTTACTTGATTCTTACTCTCTTGCAGATTATATATGTCATACTGAGATTACTCGTCAATGGATTGCTGCTTTGATTTTGTTTATGGACAAGGGATTTTGAAGAGAGGAAAAATTCAGTTGTAAGTGAGGACTGAGGATCAATATGCCATCAGTGAGAGCCTCTCACTCGTTGAGAGAAAGCAATTGCA…
14	Chr01	448245	432462	AGTCACGTTTCTCTAAAAAAGGGCATCTACAC	A	31	ATGCTACTCTTAACTCCTGGAGTACCATAGATTCTTGCTTGTTTGTAACCACGCATCTTCTTTAATTAAAATCACAAACACTACCAAATTAATGATCAAAATCAGGTTACGTAGGAGTAACTGCGTGCACACACCATTCATTTACTGCCTTTTTAAGCTGCATATATATAAACAGAGGCGTTTACAGATGGCCGCGAATGCGTGCGTGTAAAAAAAGCCAAGCAAAAAAAAGTTAAAAGAGAAAAGATTTCAAAAGGGTTGGCTGGGTGGCTAAACCTTTTTTGAATTTTGAGGGTCACCAATGTTTTGATACTTACGGAGTGGAAATGATATGAGTTGACATGGTAATTGGTTTTTGTAGGACTAATACTAGTATTTCTGATAGTGGAGTATAACAAT…	TTAACTCCTGGAGTACCATAGATTCTTGCTTGTTTGTAACCACGCATCTTCTTTAATTAAAATCACAAACACTACCAAATTAATGATCAAAATCAGGTTACGTAGGAGTAACTGCGTGCACACACCATTCATTTACTGCCTTTTTAAGCTGCATATATATAAACAGAGGCGTTTACAGATGGCCGCGAATGCGTGCGTGCGTGCGTGTAAAAAAAGCCAAGCAAAAAAAAGTTAAAAGAGAAAAGATTTCAAAAAGGGTTGGCTGGGTGGCTAAACCTTTTTTGAATTTTGAGGGTCACCAATGTTTTGATACTTACGGAGTGGAAATGATATGAGTTGACATGGTAATTGGTTTTTGTAGGACTAATACTAGTATTTCTGATAGTGGAGTATAACAAT…
15	Chr01	550376	511112	ATTCACACTTTAAAGTAGTGTTACAGGTTCAG	A	31	GAGAGAGATTAGGAGTGTAGTAGTACATGCTAGTGTGCTACTACTATTGCGCAGTGTCTGGTCTGCCAGTGCCATGCTGGGGGGGTTTGAAAAAGTCAGTACACTAGCGTTGTGTAGAATGCTTGACGTGTGAAATTCTTTACTTTTCCAGTTCCACCCCTTCGTATTTGTGTTTTATTAGGAGTAGCACCTCCATACCATATCTAATAAACTTTCTGTATTAGTACCTTCATTCTCACCGTATCGCTAGTTACAAATTACAACAACACCATCAAATAGTTGGATGAGATATAGATTTTCATGCCACGCTTTTCAAACTGCTAAACAGTGTGTTTTGTGCAAAAACTTTCTATATGAAAGTTACTCTAAAATATCATATTAATCTATTTTTCAAGTTTG…	GAGAGAGATTAGGAGTCTACTAGTACATGCTAGTGTGCTACTACTATTGCGCAGTGTCTGGTCTGCCAGTGCCATGCTGGGGGGGTTTGAAAAAGTCAGTACACTAGCGTTGTGTAGAATGCTTGACGTGTGAAATTCTCTACTTTTCCAGTTCCACCCCTTCGTATTTGTGTTTTATTAGGAGTAGCACCTCCATACCATATCTAATAAACTTTCTGTATTAGTACCTTCATTCTCACCGTATCGCTAGTTACAAATTACAACAACACCATCAAATAGTTGGATGAGATATAGATTTTCATGCCACGCTTTTCAAACTGCTAAACAGTGTGTTTCGTGTGAAAACTTTCTATATGAAAGTTGCTCTAAAATATCATATTAATCTATTTTTCAAGTTTG…
16	Chr01	595946	555531	C	CTAATATATATATATATATATATATATAATATATATATATATATA	44	TATAAAGTGAAAGAACTCTGATGACTGAAGTACATTACTCAGGCTTTGGCAACAAAACAAGAAAGAATTGATCTAGGAAAAAAGAGTGAAAAAAAACATCTAAGATGCACGACTGATTTCCAACTCTGAAAGTCCAATAGAACAATTCTCTCATCTTTTCAGAGCAGAAGCCCTGTTACATTGCCTCTGTTCTAAAGATCTTACATGCATCAAACTTAATATTAGCTTTGTGAAATTTGATGCATTTTGTGTCAGCAGCACAACATCATTTGTTTGGATGCTGAGAAGATAGGATGGCGTCCAAGGCGTCCTTGACTTGAGAGAGCTCTGGTGCTTTCCCTCCTTGTGCCGGCCAGAACTCATCAGTAGCCAAAACCTGCATCATCAGAATCAGATCAT…	CTACATCCTTGCTATAAAGTGAAAGAACTCTGATGACTGAAGTACATTACTCTGGCAACAAAACAAGAAAGAATTGATCTAGGAAAAAAGAGTGAAAAAAAAACATCTAAGATGCATGACTGATTTCCAACTCTGAAAGTCCAATAGAATCTCATCTTTCAGAGCAGAAGCTCTGTTACATTGCCTCTGTTCTAGAGATCTTACATGCATCAAACTTAATATTAGCTTTGTGAAATTTGATGCATTTTGTGTCAGCAGCACAACATCATTTGTTTGGATGCTGAGAAGATAGGATGGCGTCCAAGGCGTCCTTCACTTGGGAGAGCTCTGGTGCTTTCCCTCCTTGTGCCGGCCAGAACTCATCAGTAGCCAAAACCTGCATCATCAGAATCAGATTAT…
17	Chr01	683188	563341	AGTACTTTGTTGTCGTGATACAGAGCGCTTGACGATGAGTGAGGTTCCTCT	A	50	TCTGGGCCACAAGCGAGTGAGAACCCCTTCCGGCTCAACCAAAGCCCGTAAAGCAAAATTCATCAGGCCCATAATTAAACCTGCACTATCTGGGGAATGCTGGGCCGTTGTGCAGTTTTCATGGGCCTCAACAATCTCCCTTTGCAATTCTTTTCGGCCCAAAGTAATGTGCAGGCACCACTCGCAGCCCACCAAAAGCTCGCCATGGTGCTGTGGCAGGTAAAAACTGGGCCTAAGGGTTTGGGCCTTCATCAGGACCGTGCAAACGTTGGCCGAGCGGCACAGTGAGCGAGTCGCTGTCAAACTGAACCGCCGGCCATCTTCTCGCGTGCCGGCCTCCGCCGCTCGCCGGAGTATAACCACAGCATCTACAACCATAATCCTCCACATGAATAGAAA…	TCTGGGCCACAAGCGAGTGAGAACCCCTTCCGGTCCAACCAAAGCCCGTAAAGCACAATTCATCAGGCCCATAATTAAACCTGCACTATCTGGGGAATGCTGGGCCGTTGTGCAGTTTTCATGGGCCTCAACAATCTCCCTTTTCAATTCTTTTCGGCCCAAAGTAATGTGCAGGCACCACACGCAGCCCACCAAAAGCTCGCCATGGTACTGTGGCAGGTAAAAACTGGGCCTAAGGGTTTGGGCCTTCATCAGGACCGTGCAAACGTTGGCCGAGCGGCACAGTGAGCGAGTCGCTGTCAAACTGAACCGCCGGCCATCTTCTCGCGTGCCGGCCTCCGTCGCTCGCCGGAGTATAACCACAGCATCTACAACCATAATCCTCCACATGAATAGAAA…
18	Chr01	697943	584832	AGTAAGAATTTTTGTTTTTTTGTTTTTTTTTTTT	A	33	GGATCAACGGCGGAGGTTGCCATGGTGGACGACGGAGTGGAGAGCGAAGAAGAGGAAGAGGACGCTCCCGTACGCGTCTCGGCCCACACGTAATCCGGCGCGGCTGCGTCCATACCGGCCCAGAAGTAGACCTCTCAGTTGGGCTTTACTGATTCGGCCCACAAGCTTAGGCACACTGCATTTGAGGTGGGCTATTACTGTGGGCCTTCATTAAGCGACGCTACTCCACTATCACAACGTACTTATAACTGTCAAAAACACGGCGATGAGTTAGACGACGAAACCTCCAAAAAAAAAAAGTCAGACGACGAAACTGTTCATCATGTCATAGTACGAGAAAAGTTGCCTGCTTTGGATGCGAAAAACGATACCATTTCTACAAATTTCTGCACGCATGCA…	CCGGATCAACGGCGGAGGTTGCCATGGTGGACGACGGAGTGGAGAGCGAAGAAGAGGAAGAGGACGCTCCCGTACGCGTCTCGGCCTACACGTAATCCGGCGCAGCTGCGTCCATACCGGCCCAGAAGTAGACCTCTCAGTTGGGCTTTACTGATTCGGCCCACAAGCTTAGGCACACTGCATTTGAGGTGGGCTATTACTGTGGGCCTTCATTAAGCGACGCTACTCCACTATCACAACGTACTTATAACTGTCAAAAACACGGCGATGAGTCAGACGACGAAACCTCCAAAAAAATAGTCAGACGACGAAACTGTTCATCATGTCATAGTACGAGAAAAGTTGCCTGCTTTGGATGCGAAAAACGATACCATTTCTACAAATTTCTGCACGCATGCA…
19	Chr01	793535	698442	AACACGTGCAGGACAGGACCAAGTGATGTTTCCTCACAGACCTACAGATTTCCT	A	53	AACCGGACTCGGAGTCGAACTCTACTGATCTGATCAGCTAGATATCTCCGGTCAGACCATCCCCCTGCGGTCTAACTGACCCTATGGCACCAGTCAAACTGGCCTCGCGTGGCATGCCCAGATTCTTTCCAAAATTGACCGTATTTTCCTATTCTTACTTTAGGTGCCAAATTTAGGTATTGAGAGAGTTTGTTGCAAAGGAAGACATAGACCATACAATTATTGTGTGGTATTAATAAAGCTTACCATAGGTCTTAAAAAAAACTATATAAGATCAATGTTCTGATATAGTAACAGCTATCTAGCTTTCTTGCACCTATTTCCATTAATAGAAATGTAAACCTTACAGACAAGAAAGAGAAAAAAAAAAAAAACAAAGCAGAGCTAATCTCAGTTCTT…	AAGTAGAACTCTACAGATCTAATCGGCCAGATACTGCCGGTTAGATCGCCCCCGGCCATCGATCTGACCGATCCTATGGCAGCAGTCAAACCGGTCTCATGTGGCATGCCCAGATTCTTTCCAAAATTGACCGCATTTTCCTATTCTTACTTTTAAGTGCCAAATTTAGGTATTGAGAGAGTTTGTTGCAAAGGAAGACATAAACCATACAATTATTGTGTGATATTAATAAAGCTTACCATAGGTCTTAAAAAAAAACTATATAAGATCAATGTTCTGATATAGTAACAGCTATCTAGCTTTCTTGCACCTATTTCCATTAATAGAAATGTAAACCTTACAGATAAGAAAGAGAAAAAAAAAACAAAGCAGAGCTAATCTCAGTTCTTGGCCTCATTT…
20	Chr01	795325	700160	G	GCCCCATATATGCGCGGAAATCTAATGGCGAATCCT	35	CGTACTGGAGTAAGTAGTAACCGAGAGAGTCTGAGACAATTGATCAGGAAAAAGGAGCTACTACATCCATCCCTAAAAGGGTGGTTCGTAGCTAAAAAGACACTCTTTTAGGGATGGATGTAATGGTTCGGACTATATAACACTCTCATTGGATATTCCTGTATATGTGGTTCTATAAACTCTGGCATACCAGCTATGCACTTGACAATCCACATGCCAAATGCTATTAGGAAGCCTTCAGGTGATGGAACTCTGATCATGCAGGACCAGAAAAAAAAGGTCAATAAGAGAGAAGACAATAAGCCGACCACTGATGGCAATGCCTGTACTAGACCTTGGCTCTATTCCAATGCCCAATTCGCTGCAGGTAAAGAAAAAGGAATCAAAGAGGGGAGCCAG…	GCATAATACATACAACGTACTGGAGTAAGTAGTAACCGAGAGAGGCTGAAACAATTAATTAGGAAAAAGGAGCTACTACATCCATCCCTAAAAGGGTGGTTTGCTAAAAAGACACTCTTTTAGGGATGGATGTAATGGTTCGGACTATATAACACTCTCATTGGATATTCCTGTATATGTGGTTCTATAAACTCTGGCATACCAGCTATGCACTTGACAATCCATATGCCAAATGCTATTAGGATGCCTGATGGATATCCAATCAAGCAGAACCAGAAATGGAGGTCAATAATAGAGATGACAATAAGCCGATCACTGATGGCAGTGCCTGTACTAGACCTTGGTTCTATTCCATTGCGCAATTTGCTGCAGGTAGAGAAAAAGGAATCAAAGAGGGGA…
21	Chr01	865814	785591	GCATAGCGACAGCATGCAATGTATTCTCTTATTGTTCCATT	G	40	AAGCATCGTTACCTTGACTGCAGCAAGAGGCACGATGGGCTATATTGCACCAGAGCTATATTCTCGGAACTTTGGGGAGATATCTTATAAGTCAGATGTTTACAGTTTCGGCATGCTGGTGCTAGAAATGGTTAGCGGAAGGAGGAATTCAGACACAAGTGTTGAAAGCCAAAATGAGGTGTACTTCCCGGAGTGGATCTATGAACAGGTTACCACTGGGCAGGATTTGGCACTTGGTAGGGAAATGACTCAAGAAGAGAAAGCAACAATGAGACAGCTGGCTATTGTGGCACTTTGGTGCATTCAATGGAACCCAAAAAATAGGCCATCAATGACAAAGGTGGTGAATATGCTAACAGGGAGGTTGCAAAATCTACATGTGCCACCTAAACCATTTTT…	AAGCATCGTTACCTTGACTGCAGCAAGAGGCACGATGGGCTATATTGCACCAGAGCTATATTCTCGGAACTTTGGGGAGATATCTTACAAGTCAGATGTTTACAGTTTCGGCATGCTGGTACTAGAAATGGTCAGTGGAAGGAGGAATTCAGACCCAAGTGTTGAAAGCCAAAATGAGGTTTACTTCCCAGAGTGTATCTATGAACAGGTTACCACTGGGCGGGATTTGGAACTTGGTAGGGAAATGACTCAAGAAGAGAAAGAAACAATGAGACAGCTGGCCATTGTGGCACTATGGTGCATTCAATGGAACCCAAAGAACCGGCCATCAATGACAAAGGTGGTGAACATGCTAACAGGGAGGTTGCAGAATCTACATGTGCCACCTAAACCATTTTT…
22	Chr01	869492	789229	T	TATATATATATATTATATATATATATATATATA	32	CAGAATTCCTCCCCGGTATAGTTGATGCTAGTCACGTAGTACGTCCCTTTGTTGATCTGAATGGCAGCCCTGCCATTGCTACATGAGAGGTTGTACCATGGACGAGGAGTAGCAACGCAATCGCGCGAATCGCCTTGGAGACGGAAAGGGTAGGATATGTTGCCAAGATGGCCACAGGAGGAAGGAGGACAGTACTGGGGGTTTAGCCCTGTTCCAACAACTTCTGCTGCAACAACCGCAAGCAAAGAGGAGAGAAGTAGAGATTTCGCCATGGCTGCAGCTTCCATTCCCAGTCCGTCCCTAGAGAAATGACCACTATAATTGGCAGGGATTAGCCTTGCTGAGTATTAATTTGGTGGGGTAGGGGTGGATGCTTTAACTGGGGAGATACTGACTACT…	CAGAATTCCTCACCGGTATAGTTGATGCTAGTCACGTAGTACGTCCCTTTGTTGATCTGAATGGCAGCCCTGCCATTGCTACATGAGAGGTTGTACCATGGACGAGGAGTAGCAACGCAATCGCGCGAATCGCCTTGGAGACGGAAAGGGTAGGATATGTTGCCAAGATGGCCACAGGAGGAAGGAGGACAGTACTGGGGGTTTAGCCCTGTTCCAACAACTTCTGCTGCAACAACCGCAAGCAAAGAGGAGAGAAGTAGAGATTTCGCCATGGCTGCAGCTTCCATTCCCAGTCCGTCCCTAGAGAAATGACCACTATAATTGGCAGGGATTAGCCTTGCTGAGTATTAATTTGGTGGGGTAGGGGTGGATGCTTTAACTGGGGAGATACTGACTACT…
23	Chr01	998906	924559	A	AAGGTGCACGTACATAATTATCTTCATCTTAAGTA	34	TTGTCTTGACTGCAGTGGAACACGCATGAGGAGGTGAAGGAGGTCCATTTGAAACAGAATGTCCCTGCACCATCTTCTTACCTGCATAAGTCCTCGGTAAAAAAGACCCCCTCTAATTCACAAGTCAGCCATAAATTTGTCTACTTTCCTTTGGGTTGTCCTGAATGTAGTAGAACACGCAGGAGGAGGTGAAGGAAGTCCATGTGAAGGAGAATGTCCCTGCACCATCTTCTTATTTGCTCAAGTCCTCGGTAAAAAAGATCCCACTAATTCTCAAGTCAACCATAAATTTGTCTACTTTTTAGGCCCGGTTTAGTTACAAAGTAGTATGACCTATTTTTTTTTATTTCTACATCTAACCATAAGTATCTTGGATTTTCAATTTTTAACCTAGAGAGA…	TGCTGATTTCTTCCTTTTGGTTGTCTTGACTGCAGTGGAACACGCATGAGGAGGTGAAGGAGGTCCCTGCACCATCTTCCTACCTGCATAAGTCCTCGGTAAAAAAGACCCCCTCTATTTTACAAGTCAGCCATAAATTTGTCTACTTTCCTTTGGGTTGTCCTGAATGTAGTAGAACACGCAGGAGGAGGTGAAGGAAGTCCATGTGAAGGAGAATGTCCCTGCACCATCTTCTTACTTGCTCAAGTCATCGGTAAAAAAGATCCCACTAATTCTCAAGTCAACCATAAATTTGTCTACTTTTTGGGCCCGGTTTAGTTACAAAGTAGTATGACCTATTTTTTTATTTCTACATCTAACCATAAGTATCTTGGATTTTCAATTTTTAACCTAGAGAGA…
24	Chr01	1001490	927033	T	TACAGCGAAAGTCGGACCGAGAAAACGTACCTCG	33	TTAATTTAGCTAGTTATTGTATTGTATGAACATCACTACATTCGCTCTTAATTTAGTAGCCTTGTTGTGCTGAGGAGTACTACTACTACATGTTTGTATGCCTGTCTGTTTGGATTGGTCTTTGGATTGGTTTCTGTTTGGATTGGTAGCTGCTTGCTCGGTCAACCGAGCTAGAGATGAGAGGCCCTGGCTGAGCGCGGGCGATGTGCTTGCTCGCATGTTGTTGTACTGTATGAACATCACTGCATGCATGCATTCACTAGTAACTTGTTTGTGCTTCAGTAGTACTACCGGTTGTAACTTGTTGCAAGCATGCCCAAGTACTGGTAACTTGTTGTGCTGCAGGAGTACTACTACTCCTACATGTGTGTATGCCTGTCTGTTTGGATTGGTTTGGTT…	GCTAGTTATTGTATTGTATGAACATCACTACATTCGCTCTTAATTTAGTAGTACTAGTAACTTGTTGTGCTGAGGAGTACTACTACTACATGTTTGTATGCCTGTCTGTTTGGATTGGTCTTTGGATTGGTTTCTGTTTGGATTGGTAGCTGCTTGCTCGGTCAACCGAGCTAGAGATGAGAGGCCCTGGCTGAGCGCGGGCGATGTGCTTGCTCGCATGTTGTTGTACTGTATGAACATCACTGCATGCATGCATTCACTAGTAACTTGTTTGTGCTTCAGTAGTACTACCGGTTGTAACTTGTTGCAAGCATGCCCAAGTACTGGTAACTTGTTGTGCTGCAGGAGTACTACTACTCCTACATGTGTGTATGCCTGTCTGTTTGGATTGGTTTGGTT…
25	Chr01	1285306	1244043	T	TATATATATATATATATATATATATATATATATATATATATATATAT	46	GAGGAAAACGAGAGCTTAAGTTAGGAAAGGAGAGTGCTGAACATAGCCTAAGTCTGTGTTCTTAAGCGAGAGTTCCCAACTTTTACTCCTCGTTTTTTCCATGAGCACACTTTCCAAAATGATAAACGGTGTATATATATAGAGAGAGAATCCCTTATATGCCACTGAAAATTGGTCTGATCCCTTATATGCCATTGAAAATTGGCTCTTCCCTTATATGCCATTGATCCAAATTTGCACACCCTCTCATGCCACTCCCATCAGTTGACTGTGTGTTGACCGTTAATTCTCAAGGAAAAAAGACGTATTTACCCTTCTGAGTATATGGCATACCTAACAACTCAGAGAGGGCAAATATGTCTTTTTTACTTGAGAGTTAACGGTCAACACACGGTCAAT…	AAAACGAGAGCGTAAGTTAGGAAAGGAGAGTGCTGAACATAGCCTAAGTCTGTGTTCTTAAGCGAGAGTTCCCAACTTTTACTCCTCGTTTTTTCCATGAGCACACTTTCCAAAATGATAAACGGTGTGTATATATATATATATAGAGAATCCCTTATATGCCACTGAAAATTGGTCTGATCCTTTATATGCCATTAAAAATTGGCTCTTCCCTTATATGCCATTGATCTAAATTTGCACACCCTCTCATGCCACTCCCGTCAGTTGACTGTGTGTTGACCGTTAATTCTCAAGGAAAAAAGACGTATTTACCCTTCTGAGTATAGGGCATGCCTAACAACTCAGAGAGGACAAATATGTCTTTTTTACTTTAGAGTTAACGGTCAACACACGGTCAAT…
26	Chr01	1371791	1340925	TTAAACATTTGTTTTTATACGGTGAAAAATATGAACAGGGC	T	40	GCCGCCGTTTCGGCCTAATAACATTAGCTCGGGTAGAAGGAGCCCGAAGAAGCCCATAGAGTTGGGCTCCTTCCCGCCTATTCGCCCATCACGGCCCATAAAATAGGCCCAATTCTCGGTGGCCCAAATAGAGTGTTGGGCTGGATAGAATGCAAATCGTCCGAGACAGGCCGTGCTGACGGGCTGTAGGGCCCACAGGCATCACGACGGCCGGCGGTAGGTAATTACCGCTGACCTTAGATCATGTTGCCGTGTCACGTGGTTATACGGACACATATTTAAATCATTAAACGTAGTTTAATAATAAAATAAATTACAGGATTCGTCTATAAACTGCGAGACGAATTTATTAAGCCTAATTAATATGTCATTAACAAATATTTACTGTAGCACCACATT…	GAGCCGCCGTTTCGGCCTAATAACATTAGCTCGGGTAGAAGGAGCCCGAAGAAGCCCATAGAGTTGGGCTCCTTCCCGCCTATTCGCCCATCACGGCCCATAAAATAGGCCCAATTCTCGGTGGCCCAAATAGTGTTGGGCTGGATAGAATGCAAATCGTCCGAGACAGGCCGTGCTGACGGGCTGTAGGGCCCACAGGCATCACGACGGCCGGCGGTAGGTAATTACCGCTGACCTTAGATCATGTTGCCATGTCACGTGGTTATACGGACACATATTTAAATTATTAAACGTAGTTTAATAATAAAATAAATTACAAGATTCGTCTATAAACTGCGAGACGAATTTATTAAGCCTAATTAATATGTCATTAACAAATATTTACTGTAGCACCACATT…
27	Chr01	1453089	1413833	GTACTACATGTTTCTTGTGGTTGGTTTATGCCTGATGGTTAATG	G	43	GGCTTTGTTGCGTAAAATACAAGAGCTTGGTTCTGAAATCGTCAGAACATCCTCTGGTCCGGCAAGGATGCCCTACTAGTTAACAACCAATACACAGGAACAAAGAATAGCCTTCACAGTTGTATTCATTGGCAAAGACCTGAATTATTTACATAGAACTATACTCTAGTGCAGATATGTTTTTGAACGAACCGGCACAGAGTGTGCCAATTTCATTGAATATAGCATAGTGCAGATATGTTACCATGTAAGTAGATACACAGCAAGCAAACCACAAACTCAAGACTCAGTGCAGTATATTTTGTAGTGCTGAAAGACCAATCAGTCCATGTAACTTACTCTATAATCTATATATATGTACACATCAATACATACAGACAATTTAGGTGAATCCTGAAA…	GGCTTTGTTGCGTAAAATACAAGAGCTTGGTTCTGAAATCGTCAGAACATCCTCTGGTCCGGCAAGGATGCCCTACTAGTTAACAACCAATACACAGGAACAAAGAATAGCCTTCACAGTTGTATTCATTGGCAAAGACCTGAATTATTTACATAGAACTATACTCTAGTGCAGATATGTTTTTGAACGAACCGGCACAGAGTGTGCCAATTTCATTGAATATAGCATAGTGCAGATATGTTACCATGTAAGTAGATACACAGCAAGCGAACCACAAGCTCAAGACTCAGTGCAGTATATTTTGTAGTGCTGAAAGACCAATCAGTCCATGTAACTTACTCTATAATCTATATATATGTACACATCAATACATACAGACAATTTAGGTGAATCCTGAAA…
28	Chr01	1453345	1414044	T	TCAAAAACTCAAAATTCCTTATATTATGAATATTGTGAGACG	41	TACACAGCAAGCAAACCACAAACTCAAGACTCAGTGCAGTATATTTTGTAGTGCTGAAAGACCAATCAGTCCATGTAACTTACTCTATAATCTATATATATGTACACATCAATACATACAGACAATTTAGGTGAATCCTGAAATCCTTGTGTTCTTGCATCCAACCTGCAATGTATTCTGAAGAACTGGACAGGAGAGAAGAGAAGAGATATACTCCAATCACAAATTCCTAATCAAATGAATGTACTACATGTTTCTTGTGGTTGGTTTATGCCTGATGGTTAATGTCCTGCAATAGTATACTCCCTCCGTCCCATAATATAAGGGATTTTGAGTTTTTGCTTGCAACGTTTGACCACTCGTCTTATTCAATTTTTTTTGAAATTATTATTTATTTTA…	TTCATTGAATATAGCATAGTGCAGATATGTTACCATGTAAGTAGATACACAGCAAGCGAACCACAAGCTCAAGACTCAGTGCAGTATATTTTGTAGTGCTGAAAGACCAATCAGTCCATGTAACTTACTCTATAATCTATATATATGTACACATCAATACATACAGACAATTTAGGTGAATCCTGAAATCCTTGTGTTCTTGCATCCAACCTGCAGTGTATTCTGAAGAACTGGACAGGAGAGAAGAGAAGAGATATACTCCAATCACAAATTCCTAATCAAATGAATGTCCTGCAATAGTATACTCCCTCCGTCCCATAATATAAGGGATTTTAAGTTTTTCTTGCAACGTTTGACCACTCGTCTTATTCAATTTTTTTTGAAATTATTATTTATTTT…
29	Chr01	1497870	1447797	A	AATAAAAAAACAATGTGCACCGAGTTTCCAATATTTGGTTTACATGTCAAA	50	GCTGCACTTATTTTGGAACGGAGGTAGTAGTAGCTAGGTTTTTCTCCTAATAAATGTAAGCCATTCAGTACCATTAGCCCAAATGCAAGGCCTCACGCTTCAGAAACTTAAACTACTCACATCAAATCAAGAAAGAGGCTTTGAAGAAATTTTCCTTTTAATTTATTTAATGGAGAAAATTGCAACATGCATGGTAGTGATGTTCTAACGTACATATATATGTACTCCATGTACGTATAATGTGCGGGCGTCACTGTACGTACCGGTGGTCGAACTATATATTTTGTTTAGATAATGAAATGGTTTACAAAGGTCAACCTAATTAAGGGCCTGTTAATTAATTTGCAACATTAAAAGTTCACAGCATTTATCTAAGTTTGCATATAAGTTTTCTACAGG…	GGCTGCACTTATTTTGGAACGGAGATAGTAGTAGCTAGGTTTTTCTCCTAATAAATGTAAGCCATTCAGTACCATTAGCCCAAATGCAAGGCCTCAGGCTTCAGAAACTTAAACTACTCACATCAAATCAAGAAAGAGGCTTTGAAGAAATTTTCCTTTTAATTTATTTAATGGAGAAAATTGCAACATGCATGGTAGTGATGTTCTAACGTACATATATATGTACTCCATGTACGTATAATGTGCGGGCGTCACTGTACGTACCGGTGGTCGAACTATATATTTTGTTTAGATAATGAAATGGTTTACAAAGGTCAACCTAATTAAGGGCCTGTTAATTAATTTGCAACATTAAAAGTTCACAGCATTTATCTAAGTTTGCATATAAGTTTTCTACAG…
30	Chr01	1545434	1499759	TCGTTCAACAGGACGGCGCCAGCCTCTTTGGCGCCGT	T	36	GAGAGAATATTATGCTTGGTAGAGAAGGGGAGGTAGGTAAGAAGATTGAACAGTGGAGGGTTGTAATTGATTGAGAAAATAATGTTGGTGAATAAATTGTTATATTTTAGGATAAACCGTAAGGGCTAAAATTTGTTATATTTTGGGACCGATGGAGCGAGTAATATTTTATTCAGCCATCCAATAATATTATGTAAGAGAAATAATAAAAGATACCCATATAAAGTAAACAATATTATCTATATCTACTTTTCTTTTATTTTTTGCCTAATACTACTTCGTGTGTGTGTGTATATATTGTGAGGATTGTTATAATAAAAGTTGATTTATTTAAATCTAATACCCCGATTGGTGATGCGCTAGTATCACAGTATCACTCAGCTGGACCCCTGGATTTTT…	TATGCTTGGTAGAGAAGGGGAGGTAGGTAAGAAGATTGAACAGTGGAGGGTTGTAATTGATTGAGAAAATAATGTTGGTGAATAAATTGTTATATTTTAGGATAAACCGTAAGGGCTAAAATTTGTTATATTTTGGGACCGATGGAGCGAGTAATATTTTATTCAGCCATCCAATAATATTATGTAAGAGAAATAATAAAAGATACCCATATAAAGTAAACAATATTATCTATATCTACTTTTCTTTTCTTTTTTGCCTAATACTACTTTGTGTGTGTGTGTATATATATATATATATTGTGAGGATTGTTATAATAAAAGTTGATTTATTTAAATCTAATACCCCGATTGGTGATGCGCTAGTATCACAGTATCACTCAGCTGGACCCCTGGATTTTT…
31	Chr01	1569784	1523743	TTGTGTCTTAGAGTCCGTATTGCAGCTGTTACAGATT	T	36	GACCGAATATAGTACGACGAATCTGAATATATGTATATCCAGATTTATAGTATTAAGATGTGTCACATATAATTCTAGATTAGTTTTTTAGGAAATGAAAGGAGTAGACACCAACAAGTGTGCCTCTAACATATGCCTAAGAGGAAGAAAAGAGAACCAGCGGCAAATTACTAGCCCCACTAAATTCGTTTATATTGAAAATACACTTGTGTAATTGTACGCCGATTTGAACTTTGCTGGATAGGGTCATGTAACCACAACTTCACTGCTATACCATCAAGAATACTTTAGATTTATAAATTATTTTGTTCTTCTAGCTGATGTATATTTTTATTCTCTTTTTTTGTGCGTGTATGTGCGGTCATATGGAATGTCAATTGCAGTTTTGAGAGCAAGTTT…	GACCGAATATAGTACGACGAATCTGAATATATGTATATCCAGATTTATAGTATTAAGATGTGTCACATACAATTCTAGATTGGTTTTTTAGGAAATGAAAGGAGTAGACACCAACAAGTGTGCCTCTAACATATGCCTAAGAGGAAGAAAAGAGAACCAGCGGCAAATTACTAGCCCCACTAAATTCGTTTATATTGAAAATACACTTGTGTAATTGTACGCCGATTTGAACTTTGCTGGATAGGGTCATATAGCCACAACTTCACTGCTATACCATCAAGAATACTTTAGATTTATAAATTATTTTGTTCTTCTAGCTGATGTATATTTTTATTCTCTTTTTTTGTGCGTGTATGTGCGGTCATATGGAATGTCAATTGCAGTTTTGAGAGCAAGTTT…
32	Chr01	1590872	1544838	TGGCGCCACGTCAATGCCACATCAAAAGAAGACCAAGTCAAATTTGCCACGTA	T	52	AGGAGGGAGGCGGCGCTTAGCGGCCTGGCGAGGAGAGGCGACGCGCGGCGGCCGGGCGAGGAGGGAGGCGGCGCTCGGCGGCCGGGCGACGAAGGGCAGCTTCGACCCGGATGTGACCATTGAGGACGTCGGCGGAGGTGGCCGGGCGAGGAGGAAGGCGGCGCGTACGGCTACTGAGCGAGGAGGGGCGGCGCCGTCCGGCTGGGCATCGCGGGCGGAGCGGCCGACGGAGTGTAGCTGTCGCACTCGCCAGCACCCTCCACTGCCTGCGGCCTGTCGCCGCTCCGCCCGCCCTTCCGCCCCGCCGCCGCTCCGTCCGCCGGCATGCTCCTGCCGCCGCTCCCGCGAGGACGAGGAAGAGCGAAGAGGAAGAGAAACGAGAGCCGAGAAGGACTTGTG…	AGGAGGGAGGCGGCGCTTGGCGGCCTGGCGAGGAGAGGCGACGCGCGGCGGCCGGGCGAGGAGGGAGGCGGCGCTCGGCGGCCGGGCGACGAAGGGCAGCTTCGACCCGGATGTGACCATTGAGGACGTCGGCGGAGGTGGCCGGGCGAGGAGGAAGGCGGCGCGTACGGCTACTGAGCGAGGAGGGGCGGCGCCGTCCGGCTGGGCATCGCGGGCGGAGCGGCCGACGGAGTGCAGCTGTCGCACTCGCCGGCAACCTCCACTGCCTGCGGCCTGTCGCCGCTCCGCCCGCCCTTCCGCCCCGCCGCCGCTCCGTCCGCCGGCATGCTCCTGCCGCCGCTCCCGCGAGGACGAGGAAGAGCGAAGAGGAAGAGAAACGAGAGCCGAGAAGGACTTGTG…
33	Chr01	1642471	1596402	TCTATCTATCTATCTATCTATCTATCTATCTATC	T	33	CTAAAAGAGGGGGATTGATGAACTCCGGAACAAGAAGCAAAGCTGTTCTCTTCTCTATTGGAAATCCATGCTAGTGCACACTGCAGTCATGCATGTTTCTTTCTTCTTGGCAAGCAACATTATTGGTTTAGCTAGCTAGTTAAAATTTATTTATTTCATATATATGAGCAGTAGCCTTTTAGGCCTTATTAATGTTCTTCAAACTGCCTCGCCTAAAATTGATGTTCTTCAAAAACAATTTAGTGTCATTTTGGAGTACTCTTTTCTTAGATAACAGGAAATTTTCATTACCCAAAACAAAACAAGCAGTCATCTGATTACAGGAAAAAAAAACATATTTTGGAGTACTATAAGATGCAGCAACTTAAGTTTATAGTCATATGGATGAGTTTTATAGAA…	CTAAAAGAGGGGGATTGATGAACTCCGGAACAAGAAGCAAAGCTGTTCTCTTCTCTATTGGAAATCCATGCTAGTGCACACTGCAGTCATGCATGTTTCTTTCTTCTTGGCAAGCAACATTATTGGTTTAGCTAGCTAGTTAAAATTTATTTATTTCATATATATGAGCAGTAGCCTTTTAGGCCTTATTAATGTTCTTCAAACTGCCTCGCCTAAAATTGATGTTCTTCAAAAACAATTTAGTGTCATTTTGGAGTACTCTTTTCTTAGATAACAGGAAATTTTCATTACCCAAAACAAAACAAGCAGTCATCTGATTACAGGAAAAAAAAACATATTTTGGAGTACTATAAGATGCAGCAACTTAAGTTTATAGTCATATGGATGAGTTTTATAGAA…
34	Chr01	1667054	1620917	A	ATATATATATATATATATATATATATATATATATATATATA	40	GATGACAATGCAATTCAAAACAAAATGATGCATGCCATGATGCAATGCACTCATCTTAGGATTAAAGGAGATAGAAGAGGATCTGGGGACGAGGGGTTGAGGCAAATACTTTTAGTAGAAGAAGTATTACTTGGACCATTTTTTTTTTATCATCCTTTAACCAATGTTTCACTGGTGGAGAAACCGTTTGTAGTCCCGGTTGGTAACCCCCTTTAGTCTCGGTTGTCCAACTGGGACTACAAATCCGGGACTAAAGATAGCTATCTTTAGTCCCGGGTGAAATAACCGGGACTAAAGATCGATCAGCTACGTGGCCGGCCAAACCATCTTTAGTCCCGATTTGTGTTACCAACCGGGAGTAAAGATCGGTGCACCATTTTTTTTTCATGGCCCTGTTTG…	GATGACAATGCAATTCAAAACAAAATGATGCATGCCATGATGCAATGCACTCATCTTAGGATTAAGGGAGATAGAAGAGGATCTGGGGACGAGGGGTTGAGGCAAATACTTTTAGTAGAAGAAGTATTACTTGGACCATTTTTTTTTATCATCCTTTAACCAATGTTTCACTGGTGAAGAAATCGTTTGTAGTCCCGGTTGGTAACCCCCTTTAGTCCCGGTTGTCCAATTGGGACTACAAATCCGGGACTAAAGATAGCTATCTTTAGTCCCGGGTGAAATAACCGGGACTAAAGATCGATCAGCTACATGGCCGGCCAAACCATCTTTAGTCCCGGTTTGTGTTACCAACCGGGAGTAAAGATCGGTGCACTATTTTTTTTTTCATGGCCCTGTTTG…
35	Chr01	1673932	1625895	TATATATATATATATAATATATATATATATATATATATA	T	38	TGTCCCTCACAACCCAACCGCTGTGGCGTACAAAATTCTTGGCTGCTTCTGCCGAAGCACTAGGTCGGCCGTCTTCGTCCACCTTAGTTATGATGTGCCAACCCTCTATCTTCTTCGCGGCACTATGTTGTCCGCGTGCCCTCTTCTATCCAGCGGAGGGATGACTTCTAGTAGCCTCCTCCTCATGATTCCCCTCCTCGTTCCCCTCCGCATCCCTCTCCACGTTCCCTTCCTCGTTCAAGTACTGGTTTGGATCCTCGTTCCCCTCTCCTTCATTCCAGTACTGGCTGCTTCCCTCTGCGATTGTATCGTATAGTATCTGTTCCTCATCGCGATCAGCCATCTGTGCATACAAAAAATATTTGTTAGGTATATAGGATGTATTTGCGTACCGTAATA…	TGTCCCTCACAACCCAACCGTTGTGGCGTACAAAATTCTTGGCTGCTTCTGCCGGGGCACTAGGTCGGCCGTCTTCGTCCACCTTAGCTATGATGTGCCGACCCTCTATCTTCTTCGCGGCACCATGTTGTCCGCGTGCCCTCTTCTATCTAGCGGAGGGATGACTTCCACTAGCCTCCTCCTCATCATTCCCCTCCTCGTTCCCCTCCGCATCCCTCTCCACGTTCCCTTCCTCGTTCAAGTACTGGTTTGGATCCTCGTTCCCCTCTCCTTCATTCCAGTACTGGCTGCTTCCCTCTGCGATTGTATCGTATAGTATCTGTTCCTCATCGCGATCAGCCATCTGTGCATACAAAAAATATTTGTTAGGTATATAGGATGTATTTGCGTACCGTAATA…
36	Chr01	1773109	1716556	GATCCCTCCCGCCAAGATGAATACGCTTGTGGCTGGCTGAGCCAAAGG	G	47	TTAAGAGACGGAGGAGGTAGCGATGAGTTTTTATGGTGCGTGTGAGAAGTGATTATGCACCAATTATTTAAGGCCATAAACAAATATCTTTTTTTTTTTGAAAATCGGACTTAGAAAAGTATCCTAAGAAACTTAGTTTTATTTTTTCAAAACTACTCGAGTTAATAGTTTAGAAAACGTGTACTCAGTAATGTAGTAGCTGAAAAGAACGCAGCTGAGGAGTATAAGCATAAAAAAAATCCCGTCCTAAAATTATTTTTTTCCTTGGCTACTTGCAACGATAACCTTGTTTGGAGAGTGTCTGGTAGCGGCAACTTGATTTTCTAGCTTCTCTGAAAAGCACAGGTTCTCACTTATATGCTGAGAATATATAGTCGTAGAATTAAAAAAAATAAACTA…	TAAGAGACGGAGGAGGTAGCGATGAGTTTTTATGGTGCGTGTGAGAAGTGATTATGCACCAATTATTTAAGGCCATAAACAAATATCTTTTTTTTTTTTGAAAATTGGACTTAGAAAAGTATCCTAAGAAACTTAGTTTTATTTTTTCAAAACTACTCGAGTTAATAGTTTAGAAAACGTGTACTCAGTAATGTAGTAGCTGAAAAGAACGCAGCTGAGGAGTATAAGCATAAAAAAAATCCCGTCCTAAAATTATTTTTTTCCTTGGCTACTTGCAACGATAACCTTGTTTGGAGAGTGTCTGGTAGCGGCAACTTGATTTTCTAGCTTCTCTGAAAAGCACAGGTTCTCACTTATATGCTGAGAATATATAGTCGTAGAATTAAAAAAAATAAACTA…
37	Chr01	1834607	1778083	C	CTTCGAATTAGAGGCATTACAGCCTTACAGGAGAGTGAATTTTACAAGGG	49	TCCACCCCTAACTAACGTTAAATCGACGAAAACCTACTAAAACAACAAATAAATGATAAAAACAGTTCGAATTAGAGGCATTACAGCCTTACAGGAGAGTGAATTTTACAAGGGTAAATGTCTAGCTCGGTTAACTTCGAATTAGAGGCATTACAGCCTTACAGGAGAGTGAATTTTACAAGGGTAAATGTCTAGCTCGGTTAACTTTAGAGGATAAATAAATAATTTTCTTAAAAAGGAAAAAAGAGCACATACTAATTAATGAAAATCATAAAACAAGTCGAATCAAGCAAACCATCCAAATCACACCCAACTCTTCTTCTTCCCATCCTCCAGAGATCCAAGCAGCTTAGCCATGTCGCTGGTGAGGCGCAGCAACGTGTTCGACCCCTTCTCCCT…	TCCACCCCTAACTAACGTTAAATCGACGAAAACCTACTAAAACAACAAATAAATGATAAAAACAGTTCGAATTAGAGGCATTACAGCCTTACAGGAGAGTGAATTTTACAAGGGTAAATGTCTAGCTCGGTTAACTTCGAATTAGAGGCATTACAGCCTTACAGGAGAGTGAATTTTACAAGGGTAAATGTCTAGCTCGGTTAACTTTAGAGGATAAATAAATAATTTTCTTAAAAAGGAAAAAAGAGCACATACTAATTAATGAAAATCATAAAACAAGTCGAATCAAGCAAACCATCCAAATCACACCCAACTCTTCTTCTTCCCATCCTCCAGAGATCCAAGCAGCTTAGCCATGTCGCTGGTGAGGCGCAGCAACGTGTTCGACCCCTTCTCCCT…
38	Chr01	1972475	1918357	AGAGGTATGATGCAGGGATTCCACAAGGAATA	A	31	TCGAGCGACCAAGATTTTTCCCTTGAACCACAAGAGCAGCTCCCAATTTTCCCGGAACAAATCCAATTGCAAAGAGCATATGCAATGAAAAGGATTCAGAGGGCTCTTAGGTTTTTCCATTTGGCTTGTCCTACGGTCAAGGTCGGCTCTGATACCAACTTGTCACGCCCAGAAATTCCCGAATAGAATTCCAAGCAGAATGTGCATTAAAATCCCCGTCCAGGACCAGCCGGGGTACACAAACGACAATGTTGACATACAGATCCACGTCTTACAAACATTATAAAATCTTACAGAAATGCAGCGGAAAACAAAAGAAACTGGAGCTAAGCCTTGACTAAACTGCAGCGGGAACACCACTCCACAGGCATCCTCGATGGCACGGACGAAGCCTACTCC…	TCGAGCGACCAAGATTTTTCCCTTGAACCACAAGAGCAGCTCCCAATTTTCCCGGAACAAATCCAATTGCAAAGAGCATATGCAATGAAAAGGATTCAGAGGGCTCTTAGGTTTTTCCATTTGGCTTGTCCTACGGTCAAGGTCGGCTCTGATACCAACTTGTCACGCCCAGAAATTCCCGAATAGAATTCCAAGCAGAATGTGCATTAAAATCCCCGTCCAGGACCAGCCGGGGTACACAAACGACAATGTTGACATACAGATCCACGTCTTACAAACATTATAAAATCTTACAGAAATGCAGCGGAAAACAAAAGAAACTGGAGCTAAGCCTTGACTAAACTGCAGCGGGAACACCACTCCACAGGCATCCTCGATGGCACGGACGAAGCCTACTCC…
39	Chr01	2050799	1996901	AGTTGCGTTGCGTTGCTTTGCGGTTGCGCGGC	A	31	AGTGCGTTACCATGTAGTAAATGCAACTAGTAGACATGACCCGGATACCTCGAGATGACCGGAGCAGCAGCATCAGCTGGCTGCTTTACCCCCGTGTCATCAGCGACCTTGCTGTTCCTCGCAGCGGCCGGCGGCTTCGGCGACGGCTGGTCGGCGGCGCGGCCGTAGACATCCCTCGTTGCGGCGGCGGCGGCGGTGACGGGTTTTCTTGCGACGTCGTTGTTGGCTTTGCGGCCTGTCTCGTCGGTGGCCACGGTGGTGTAGCCTCGGTAGTAGTCGTCGCCGCCGCCAACGCCAACGCCAAAGCAGGTGCCCAGCTTGAAGCACATGCTCGACTGCTGCTGCTAGACAAGCCGATGATCTAGTGACTAGGTTGGTGTTGGCGATGCCTTGACACGA…	CGTTACCATGTAGTAAATGCAACTAGTAGACATGACCCGGATACCTCGAGATGACCGGAGCAGCAGCATCAGCTGGCTGCTTTACCCCCGTGTCATCAGCGACCTTGCTGTTCCTCGCAGCGGCCGGCGGCTTCGGCGACGGCTGGTCGGCGGCGCGGCCGTAGACATCCCTCGTTGCGGCGGCGGCGGCGGTGACGGGTTTTCTTGCGACGTCGCTGTTGGCTTTGCGGCCTGTCTCGTCGGTGGCCACGGTGGTGTAGCCTCGGTAGTAGTCGTCGCCGCCGCCAACGCCAACGCCAAAGCAGGTGCCCAGCTTGAAGCACATGCTCGACTGCTGCTGCTAGACAAGCCGATGATCTAGTGACTAGGTTGGTGTTGGCGATGCCTTGACACGAATGA…
40	Chr01	2086684	2029813	TATAGGCTTAGTTTTACTCAAGTTGAGCATTTCAGGTTGTAACAAATCAG	T	49	TCGCCGCCGCCGCCGGGGGTGCCGCCGCCACCGGCGCCTCGCTCCAGGAGATCGATTAGGCTCGTGGGTCGGATCTGCTGGTGCTCCTACTGTTCCCCCCTCCTTATCTAGCTTTTGTTTCGCTATCAACTGCTTCTGCTAGGAGTTCATGCTACCTGAACACTGCTTGCTGCTTTATCGTTGAAAATGTCTCCATGAGAGTTTTGGATCCTTGATGTTGATCTATATCTACGATGTGGCTCTGTCTGGGATTTTGAGTTATGAAGAAATCATTATAAGTCTAAATGCTCCCGTTTTGTTTGTGTTGCCTAGATATACTGAATGGCATTTCATGGACTGTGTTACCTAGATATACCGAATGATTCTAGGTTGATAAGACTCTGGTTTTCTGGATGATGT…	CCGATGACGTCGCCGCCGCCGCCGGGGGTGCCGCCGCCACCGGCGCCTCGCTCCAGGAGATCGATTAGGTTCGTGGGTCGGATCTGCTGGTGCTCGTACTGTTCCTCCCCCTCCTTATCTAGCTTTTGTTTCGCTATCAACTGCTTCTTTTAGGAGTTCATGCTACCTGAACACTGCTTGCTGCTTTATCATTGAAAATGTCTCCTTGAGAGTTTTGGATCCTTGATCTATATCTACGATGTGGCTCTGTCTGGGATTCTGAGTTATGAAGAAATCATTATAAGTCTAAATGCTCCTGTTTTGTTTGTGTTGCTTAGATATACTGAATGACATTTCATGGACTGTGTTACCTAGATATACCGAATGATTCTAGGTTGATAAGACCGTGGTTTGCTGGAT…
41	Chr01	2122714	2076784	ATGTATATATATATATATATATATATATGTATATATATATATATA	A	44	GCATCAATTCATAGGCCACAGTAGCGATCCTTTTCTGGATCCCTCCCTGCAGCCACTGGACGGCTGGACCAGCTAGCTTAGCTAGCGGCAGCTGATGCTCTCGTACGCTGATGGATGCAGCAGCATGCACTGCACACACACAAACCACCCGGGCCGCGGTTTCTAGCTTCCCCCCCGGTGTGTGGAGATGAGATGATCTCTCTCTCTCTCTCTCTCTCTCTCTCTCTCTCTCGGCCACAGCCACACGGGCCGTACGTTGCGCGCCGTGGTTTTTGGATGCCCAAGTTGCTCATCCGGGATGGAGAAGGACGCATGAACCGTAAGGTTGTCTCGCTATGATGTTACAGGACGGACGAAAATTTTTCGGTCCAGTACTCGAGGAGGGTTTTATTGAGGGGA…	GTCATCCAGCAGCAGTGGCAGCAATACCAGTGGCAGCATCAATTCATAGGCCACAGTAGCGATCCTTTTCTGGATCCCTCCCTGCAGCCACTGGACGGCAGGACCAGCTAGCGGCAGCTGATGCTCTCGTACGCTGATGGATGCAGCAGCATGCACTGCACACACACAAACCACCCGGGCCGCGGTTTCTAGCTTCCCCCCCGGTGTGTGGAGATGAGATGATCTCTCTCTCGGCCACAGCCACACGGGCCGTACGTTGCGCGCCGTGGTTTTTGGATGCCCAAGTTGCTCATCCGGGATGGAGAAGGACGCATGAACCGTAAGGTTGTCTCGCTATGATGTTACAGGACGGACGAAAATTTTTCGGTCCAGTACTCGAGGAGGGTTTTATTGAGGGGA…
42	Chr01	2285368	2218807	T	TATGCATGTGTACCAACTTGTTCCCCTGCCTCTGG	34	ACGTACACTAACTTTATATAGAAACACACATGTCAACTTAATTTTAAATTTGTGATGCATGAAACCACACAAAAATACATTCAAATGCTAGAAAATGATAAAATTTATTTGCGAGACAAAATGCATAGGAAGGTTTAAATTTTTTTTCCCGAATGATAAAAATGTATCAAAGACAAAATGCCTCGGAAGATTTACAATTTTTTATAGGGAACAATACCAATCAATTCATTTAGGTATTTGATTAACCCAAAATGTCCATATATTTTACTATTTTACTAGTCAACTGCCATCGGTTACGATAACTTTTATTTCGTACCTTAATTACCTCTCCCTTGATCAACCGTTCACGTTGTTATACCTCTCCATACATCTAAATACCTCACAAACACAGTAAAAACT…	CACGTACACTAACTTTATATAGAAACACACATGTCAACTTAATTTTAAATTTGTGATGCATGAAACCACACAAAAATACATTCAAATGCTAGAAAATGATAAAATTTATTTGGGAGACAAAATGCATAGGAAGGTTTAAATTTTTTTCCCGAATGATAAAAATGTATCAAAGACAAAATGCCTCGGAAGATTTACAATTTTTTATAGGGAACAATACCAATCAATTCATTTAGGTATTTGATTAACCCAAAATGTCCATATATTTTACTATTTTACTAGTCAACTGCCATCGGTTACGATAACTTTTATTTCGTACCTTAATTACCTCTCCCTTGATCAACCGTTCACGTTGTTATACCTCTCCATACATCTAAATACCTCACAAACACAGTAAAAACT…
43	Chr01	2355099	2288591	G	GAAGAGCCTGAAGCTCTTACATAGTTACCAGACTTG	35	TCGTTACCAATACCTTTGTTTATACTATATTTGATCTGTCAATGCAGACTAAACCAATACTAATTCTTTCTTCAGTGTAGTTATCATGGAGGGTAATCCACACCCTGGAGCTGTAAAGGGTCGAATGTCATTCCTGAATTTCAACCCATCCATTGATGTGAGATTCGAAGATTATTTTTTTACATCTTGTTGCAACATTGTTGTGTTCCCTCACCCAAACCTAGAACTGTAGAAATTAACTCAAGAGGCAACGAGTGGCCGCCAATCACAGTCAGCATCACCTAGTAATAATCATCAGGATGGTTCGAACTCCAGCAGGTTAGCTATTTACCAGCTCTTTTCTGTGTTGTAACTGTTGTTAACTTAGATTAGCTAATTTATCTATTACAAAAATACAAA…	CAGTACTTCATTATCAATACCTTTCTTTATACTATATTTGATCTGTCAATGCAGACTAAACCAATACTAACTCTTTCTTCAGCGTAGTTATCATGGAGGGTAATCCACACCCTGGAGCTGCAAAGGGTCGAATGTCATTCCTGAATTTCAACCCATCCATTGATGTGAGATTTCAAGATTATTTTTTTATATCTTATTTGCAATATTGTCGTGTTCCCTCACCCAAACCTAGAACTGTAGAAATTAACTCAAGAGGCAACGGGTGGCCACCAATCACAGTTAGCATCACCTAGTAATAATCATCAGGATGGTTCGAATTCCAGCAGGTTAGCTATTCACCAGCTCTTTTCTGTGCTGTAACTGTTGTTAACCTATAGCTAATTTATCTGTTACAAAATA…
44	Chr01	2412525	2355734	C	CAGACAACTTAATTTGAATAGCAGACTCGCTGATA	34	ACTTGGGCAGCTATCCATATTTCATGGGTTGACTTGGGCTTACAAATTTCTCCCAAAACGATGCCCAAAGCTTTAATGGGCCATAAAGTGGCGATCCAGTTGAGCACGAATAAATCGCGTGGTTGAGGTTCGGAGTTTAATTCGCCAACCCCTGTCTATGCAAAACTTTTCCATTGTTTGTTTCAAAAAAAAAAACATTTCCATTGTTTGGAGGCAATAAGAAGAGCTCCATGATACAAATGATTTCATCTGAGCACGTAAGGTTGCTTCTACATAAGGTTTTGTTCCCATCACACTATCTCACGAAAGCAAATTCAAGCTGATATAAAACTTCATTTGCTGAAAACATCTGAAAAATGTAAGCGTGGTACTGCAGGTCTGCACCTGCCATCGGCCATA…	TTGGGCAGCTATCCATATTTTCATGGGCTGACTTGGGCTTACAAATTTCTCCAAAAACGATGCCCAAAGCTTTAATGGGCCATAAAGTGGCGATCCAGTTGAGCACGAATAAATCGCGTGGTTGAGGTTCGGAGTTTAATTCTCCGACCCCTGTCTATGCAAAACTTTTCCATTGTTTGTTTCAAAAAAAAAAAACATTTCCATTGTTTGGAGGCAATAAGAAGAGCTCCATGATACAAATGATTTCATCTGAGCACGTAAGGTTGCTTCTGCATAAGGTTTTGTTACCATCACACTATCTCACGAAAGCAAATTCAAGCTGATATAAAACTTCATTTGCTGAAAACATCTGAAAAATGTAAGCGTGGTACTGCAGGTCTGCACCTGCCATCGGCCATA…
45	Chr01	2426168	2357417	A	AGACGTGGGCCCGCTTGTCATTCGGATGGTGC	31	GCCTCGGCTGATTCCTGGACGAGGATTCACACACATGTAAGCGTTTGGAATTTTGGATAGAAATTCCGGGCGTGACAGTGGTGGTGGCCAAGGTGATTGCCGCGGAAATGGTGGCTAAGCCGAGCACCCACAGCGCCGCGTCCACGTTGGCCTCCGCTTCGTCCCGTCGAGTAACAGCCACCACCATATCTTGATTAATTTCGAAGACTAATTTGAGATCGAAGCTAGATAGAATTAAGGCCAAAAGAAATAATAATACTGGTAGAAGATTTAGCTAGGTTAATTGCTTTAGCAAATTTGCTAGAGAGTTTCCCCCATCTTCAAGTATTGCATCGATCTTCCTCGAAGATGTGTATATATATAATCACGTACTACTACTAGCTGCCATGAGTTTTCTGT…	GGGCCAGGCCGGCGAGGAAGGTCTCACCACTGCAAGTGCAAGTGCAAGGTAGGAGTAATAGGCAGCGCCGTTATTACCCAAGTCAGCTTGCAGCGGCGTGGTGGTGGTGGCCAAGGTGATTGCCGCGGAAATGGTGGCTAAGCCGAGCACCCACAGCGCCGCGTCCACGTTGGCCTCCGCTTCGTCCCGCCGAGTAACAGCCACCACCATATCTTGATTAATTTCGAAGACTAATTTGAGATCGAAGCTAGAATTAAGGCCAAAAGAAATAATACTGGTAGAAGATTTAGCTAGGTCAATTGCTTTAGCAAATTTGCTAGAGAGTTTCCCCCATCTTCAAGTATTGCATCGATCTTCCTCGAAGAGATGTGTGTATACGTACTACCTGCCTTGAGTTTT…
46	Chr01	2496831	2414016	GAAATCTGCAGCTGATGAGGTGTCTCAACTT	G	30	GTGTGTGCCTAACAGTAGAGATTGGATATGTAAACCACGTCTATTGTGTAAGAAATATGTAGTATGCGACGTGATATCCTCACACCATGAAAATCATGTATTGCCAGTTTTTTCGCAGTGTTAAAAGTCTAGGTACATGATACTATGAAAGAAATGGGAAGAACATCACATAAAACTTACAGTCTTCTTGTAGTACTCGATCTCAGCTTTCAGTTCATCATTCTGCTTTTTCAGGGATTCAATGTCCTTGTTCTTCAGCTCCAACTGTAACCTGAGCTTCTGATTCTCTTCATGCTCGAGCTCCTTTGTCTTGAGAGCGAGCTGCAACCTCAGATTCTCATTCTCTTGAGAGATCCTTTGAGAATCCTGAGCCAGAACAAGAGCTGAATGCAGAGAAAT…	GTTGTGTGTGCCTAACAGTAGAGATTGGATATGTAAACCACGTCTACTGTGTAAGAAATATGTAGCATGCGACGTCATATCCTCACACCATGAAAATCATGTATGGCTAGTTTTTTCAGTGTTAAAAGTCGAGGTCATGATACTATGAAAGAAATAGGAAGAACATCATATAAAACTTACAGTCTTCTTGTAGTACTCGATCTCAGCTTTCAGTTCATCATTCTGCTTTTTCAGGGATTCAATGTCCTTGTTCTTCAGCTCCAACTCTAACTTGAGCTTCTGATTCTCTTCATGCTCGAGCTCCTTTGTCTTGAGAGCGAGCTGCAACCTCAGATTCTCATTCTCTTGAGAGATCCTTTGAGCATCCTGAGCCAGCACAAGAGCTGAATGCAGAGAAAT…
47	Chr01	2535719	2453960	G	GTTGCTGCGCTTTGTGAGATGGGCGTCGTCA	30	GAGAGAGAGAGAGAGAGAGAGGGAGAGGGAATAAAAAATACAGAAAACTGAATAATAAGTGTAGAATACTAAAACACCCAAATTGGTTCTCTCTTCCATCGCCCCGCTGCATCAGCAGCCACACTAGCAGTTGGAATGCTAGATGCATTACCATTCAAGCTTCCATCAATATCCATCGCATCTAACAAGATATGTCACTTGTAGTCTTGTAGTACTAAGAAAGTAAGATCTGCAGTGGACCGGAAGAACCAAGTACTAGGCAGCACAGGCTGTGCGGCTATGCCTGGTTGCGGAGCTGTGGCAGCCGGCTGCCAGTAGAGACCCTGTTTCAGATGGTGGCACCACAATGGCCGGCGGATGGCGGAGGCACTGTGGCATATGGCGGCACCATGACGGCCG…	GAGAGAGAGAGAGAGGGAGAGGGAGAGGGAATAAAAAATACAGAAAACTGAATAATAAGTGTAGAATACTAAAACACCCAAATTGGTTCTCTCTTCCATCGCCCTGCTGCATCAGCAGCCACACTAGCAGTTGGAATGCTAGATGCATTACCATTCAAGCTTCCATCAATATCCATCGCATCTAACAAGATATGTCACTTGTAGTCTTGTAGTACTAAGAAAGTAAGATCTGCAGTGGACCGGAAGAACCAAGTACTAGGCAGCACAGGCTGTGCGGCTATGCCTGGTTGCGGAGCTGTGGCAGCCGGCTGCCAGTAGAGACCCTGTTTCAGATGGTGGCACCACAATGGCCGGCGGATGGCGGAGGCACTGTGGCATATGGCGGCACCATGACGGCCG…
48	Chr01	2563846	30864646	T	TGGGGAAAACGGGGGCTGGGGGGAGAAACGC	30	TCACAGACCGGTCAGATCACGGGTCAGGTGGCGACTGGCAGTCTGACGCACGCCTTGCCCCGTCCCGTCAAGACGAAAGCCTCTAGGCTCTTGTCTCAAGCCGGAGCTAGCGTGTTATCTCTTAAAGATGGCACGTTAGCCCTAGTTAGATTTATACCAGGCTTCATCCTAACCATTACAGGCAGGGTGTTACATGAAGAAGGACAAACATGCACGTTGCTAAGCTGACGCGTGGTGGACAAGAATGACCGGTCTGACACTGGTCGCATCGTGAACAGACAGCCACAATCCCGCGTCATCTCTGTCTCCGGCGGAAGTGGGGGTAGGTGTGGGCTGTCCCATCAGAGAGGCGCCCAAGCGGAAACCGTACCGATCTCCGCCGATTATGGAGAAGAAAAA…	CGGTCAGATCACGGGTCAGGTGGCGACTGGCGGTCTGACGCACGCCTTGCCCCGTCCCGTCAAGACGAAAGCCTCTAGGCTCTTGTCTCAAGCCGGAGCTAGCGTGTTATCTCTTAGAGATGGCACGTTAGCCCTAGTTAGATTTATACCAGGCTTCATCCTAACCATTACAGGCAGGGTGTTACATGAAGAAGGACAAACATGCACGTTGCTAAGCTGACGCGTGGTGGACAAGAATGACCGGTCTGACACTGGTCGCATCGTGAACAGACAGCCACAATCCCGCGTCATCTCTGTCTCCGGCGGAAGTGGGGGTAGGTGTGGGCTGTCCCATCAGAAAGGCGCCCAAGCGGAAACCGTACCGATCTCCGCCGATTATGGAGAAGAAAAACAGTCCAG…
49	Chr01	2577655	2485362	T	TATATATATATATATATATATATATATATATATATATAT	38	ATTGTTTTTTTCATGTTTTGGAAGTCTCTGCATGCTTTGTGGTGTGTCTTCATGTGTCTATACCATACTCCCTCTGTCCTAAAGGGGCACATCCCTTTCTTCCTAGGTTGAGTTGTTGCGGAACGGATGGAGTATGAGACATTCTTTTTCACTACTTGTAAGATTGACAGATAGTTAATTATTCCTTGTTTAGTAATGGCAAATAGTTTCTGTTTATTTTCCCGTATGGCTTTTCTTGGAACGGACGAACCAAAGGATTTTATAGAAGTCAAACATAGCAAATATACTGCCTCCAGGCGGTTTTTTTTTTCACGTAACGTTATATAAATTAGCAAAATTGTATGTGCGATGCAACGGAAAGAAAAAAACGAGAAAATTAAATTAAAACATATTAAATTC…	ATTGTTTTTTTCATGTTTTGGAAGTCTCTGCATGCTTTGTGGTGTGTCTTCATGTGTCTATACCATACTCCCTCTGTCCTAAAGGGGCACATCCCTTTCTTCCTAGGTTGAGTTGTTGCGGAACGGATGGAGTATGAGACATTCTTTTTCACTACTTGTAAGATTGACAGATAGTTAATTATTCCTTGTTTAGTAATGGCAAATAGTTTCTGTTTATTTTCCCGTATGGCTTTTCTTGGAACGGACGAACCAAAGGATTTTATAGAAGTCAAACATAGCAAATATACTGCCTCCAGGCGGTTTTTTTTTTCACGTAACGTTATATAAATTAGCAAAATTGTATGTGCGATGCAACGAAAAGAAAAAAACTAGAAAATTAAATTAAAACATATTAAATTC…
50	Chr01	2679750	2600827	CTGCCAAAATTTTGGTAAGTTGCCAAAATTTTGGCAACTATACTAAAATTTTGG	C	53	TGAAAACCGATCCAAAATTGGTAAAAATCAATGACTTTCGGTCAACACGGTACGGCTGATGTCGATAGCAGATAAGGGCAGCGAAGCATATCTTTTGTTTGAAAAACTGTTGGAGCATTGTGCCCCCTATGCTCTCATAAGTAATACTCCTCCGTCTTTAAATATATTAATCTAATAGTACTACATTAGACACAACTATTGTTAATGGGTCTACTCTAGTACCGTGATGCTCAATTTTAGGATGGAAGGAGTATGCAAACAATGCCACTTTTATTTTTATCGTAGCATACATGTTCTATTTGTGCACTCAAAATACCCGGTGAAGTAATTTTCTTAAAAGAACACCTTTTTGAAAAGAAAATAATAAATACTCCGTACAAAAGAAACCTAGGGCATGTT…	CAAAATTGGTAAAAATCAATGACTTTCGGTCAACACGGTACGGCTGATGTCGATAGCAGATAAGGGCAGTGAAGCATATCTTTTGTTTGAAAAACTGTTGGAGCATTGTGCCCCCTATGCTCTCATAAGTAATACTAATAAAGCATTTCCTCCGTCTTTAAATATATTAATCTAATAGTACTACATTAGACACAACTATTGTTAATGGGTCTACTCTAGTACCGTGATGCTCAATTTTAGAATGGAAGGAGTATGCAAACAATGCCACTTTTATTTTTATCGTAGCATACATGTTCTATTTGTGCACTCAAAATACCCGGTGAAGTAATTTTCTTAAAAGAACACCTCTTTGAAAAGAAAATAATAAATACTCCGTACAAAAGAAACCTAGGGCCTGTT…
51	Chr01	2709219	2630151	CTTTGAAATACATTTTTTTTCAAATGGTTTCTGCATAGATCAGTGTAATTCCTGT	C	54	GCTTTTCTTTCTTTCTGACGAATGGTGAATAATTTTCACTGATACAATGTTCGCGAATTCTTCAGATAGTCCCTTGACCACACTCGATTTTCTTCAGGCAAACAATCTCTTCTCACCCGGGCCGATCATTCAGAAACCAGGCTGTTACTAGCAGACATTGACCATCTGTTACCGTGCTGTCAAAGTAGTACTATTACCGGTGCGGTCTTTGTTCAATGCTGCACAATTCAGTTTGTATTTCACATTCTGAAAGTTTGAAACACAAAATATTCACAAGAATCAGGGAAACAGTTCACGTGTTTCAAACGGGGCCTTACATTTGGTCGATCTATACCCAATTGTCAAAATGGGTTTAGAAAAAAAATGATAATAACGTTCAGAAAACTGATATGTAGGGTA…	TTTTCTTTCTTTCTGACGAATGGTAAATAATTTTTCACTGATACAATGTTCGCGAATTCTTCAGATAGTCCCTTGACCACACTCGATTTTCTTCAGGCAAACAATCTCTTCTCACCCGGGCCGATCATTCAGAAACCAGGTTGTTACTAGCAGACATTGACCATCTGTTACCGTGCTGTCAAAGTAGTACTATTACCGGTGCGGTCTTTGTTCAATGCTGCACAATTCAGTTTGTATTTCACATTCTGAAAGTTTGAAACACAAAATATTCACAAGAATCAGGGAAACAGTTCACGTGTTTCAAACGGGGCCTTACATTTGGTCGATCTATACCCAATTGTCAAAATGGGTTTAGAAAAAAAAATGATAATAACGTTCAGAAAACTGATATGTAGGGTA…
52	Chr01	2735871	2657851	A	AGGTCTTTGAATTGCTCCAACCACATTCTTGAATT	34	GTTTATCAGCGGCAGCTAAATTTTAACTTTAGCATTTAATTTTAGAGATGATTTTGAGATTTTCTTATCGCAGTTTATTTTTCATCATTAGCTTCTAAATTTGTAAGAACGCCTATGTAAAAGTTTTACATATAATTTTTTTTGCTTCGTTTATTTTTCTCACGGCTTATCAAAGGCAAACGATGAGAAGCCGTTGGCATAAACTGTAGTGGTAGAAATCCCCTAGCTTTATTATGAGCATGCTGGTGAGTGATGTAACTATATTTTCGTATCAATAAAGATAGCCGAATGGCATAAAAAAAAGTAGAAGTAGGATCTAACCTAGGTGAGCCCCTGTTTCTGGTTTGTGTGTTGGTTATTGACACTTTGACAGGGTTTGGCAACAAACAAGAACAGCAA…	GTTTATCAGCGGCAGCTAAATTTTAACTTTAGCACTTAATTTTAGAGATGGTTTTGAGGTTTTCTTATCACAGTTTATTTTTCATCATTAGCTTCTAAATTTATAAGAACGCCTATGTAAAAGTTTTACATATAATTTTTTTTGCTTCGTTTATTTTTCTCACGGCTTATCAAAGGCAAACGATGAGAAGCCGTTGGCATAAACTGTAGTGGTAGGAATCCCCTAGCTTTATTATGAACATGCTGGTGAGTGATGTAACTATATTTTCGTATCAATAAAGATAGCCGAATGGCATAAAAAAAAGTAGAAGTAGGATCTAACCTAGGTGAGCCCCTGTTTCTGGTTTGTGTGTTGGTTATTGACACTTTGACAGGGTTTGGCAACAAACAAGAACAGCAA…
53	Chr01	3305769	3240202	CAGCCCGAACCAGGAGTAGGGTGTTACGCTCCATA	C	34	AGGCGCCGCCCGATTGATGTGCGTCAATCGGGCTTGATCGGTCTGTGACCGGCCAACAGGCGGACGGGACGGATAGCAGCGCACCCACGTCCCGCCCGGTGTCAGGCGAAGTGGGGGCAGATAAGACCTGTCCCATCGGCACGTCGGTGAGCGTGCTGCTCCTATATGGAGTCCACCAAAGTCGCAAACGAATTAAGGGCGAATGACGGGCGTGTCCCCCGTGTCAGGCGGGGGACGGCGCTGGGCCCACCTGAGGATGAGCAACCACCTTGTTTCTGGTTGAAGGTAAGGACAATGGCTTGACCCAAGACATGTGGGCCCCCACCCAATGATGGATTGTGTAAGGCGGTGCATGTGGTATCCCCTTGAACTATAAAAGGAGGACCTTACCCACCGAGA…	AGGCACCGCCCGATTGATGTGCGTCAATCGGGCTTGATCGGTCTGTGACCGGCCAACAGGCGGACGGGACGGATAGCAGCGCACCCACGTCCCGCCCGGTGTCAGGCGGAGTGGGGGCAGATAAGACCTGTCCCATCGGCACGTCGGTGAGCGTGCTGCTCCTGTATGGAGTCCACCAAAGTCGCCAACGAATTAAGGGCGAATGACGGGCGTGTCCCCCGTGTCAGGCGGGGGACGGCGCTGGGCCTACCTGAGGATGAGCAACCACCTTGTTTCTGGTTGAAGGCAAGGACAACGGCTTGACCCAAGACATGTGGGCCCCCACCCAATGATGGATTGTGTAAGGCGGTGTATGTGGTATCCCCTTAAACTATAAAAGGAGGACCTTACCCACCGAGA…
54	Chr01	3359005	3293525	TTTTATTCCTTACTACCCACTTTAAATGCACAT	T	32	GCATGATTCGAGTTGAAATCACACCAGAATTCAACTTTCGGTGTGGAATTATAAACCTCCATCTCCTCAAAAGGTTCTAACAGCGTACCGTGTATCAGTTCATGTTTCATGGGATTAACCTGAAATATTTTGTTGGTATTCAACTACCACTCTTATCAGAGGCACAGCTACTTTAAGCAGTTAAGCATACCAGCAACATGGCACAGCTACGAAAGGGCATGTAGTCTAGTGGTTACAGTGACCTGAGTAGTACCCAAAGGTCCTGAGTTCAAATCTCCTATGGAGCGAATTTCAAATTGGGTTGTTTGCGGGGCTAAGTTCCCTATCTCAATGGCCGTATATATCTGGTTGGATATGTAGGCCGTATACAGCTGCCTAGCTGCATTAGGGCATCACCAA…	TGAGCATGATTCGAGTTGAAATCACACCAGAATTCAACTTTCGGTGTGGAATTATAAACCTCCATCTCCTCAAAAGGTTCTAACAGCGTACCGTGTATCAGTTCATGTTTCATGGGATTAACCTGAAATATTTTGTTGGTATTCAACTACCACTCTTATCAGAGGCACAGCTACTTTAAGCAGTTAAGCATACCAGCAACATGGCACAGCTACGAAAGGGCATGTAGCCTAGTGGTTACAGTGACCTGAGTAGTACCCAAAAGTCCTGAGCTCAAATCTCCTATGGAGCGAATTTCAAATTGGGTTGTTTGCGGGGCTAAGTTCCCTGTCTCAATGGCCGTATATATCTGGTTGGATATGTAGGCCGTATACAGCTGCCTAGCTGCATTAGGTCACCAA…
55	Chr01	3411199	3337820	TTAATAAATACTAAAAGTTGACTCTGAGCCGT	T	31	TGGAGTGAAATGCAGTTGCGACGACTGACAGGCCGTCACTTTATGTTCCATGTACGATGAAGAGTTGAACGGCAGCATGCGTCAGCGTGTGAACAGTCTCTACTACGAAAACCATCTTTATGTACGAGGACCCTATAAACTACAGACGGATCATAATTAGTCGTGTCTGCAAAAATTGAATTACATTTTCGCATGCAGTTACAAAAGGGGAAAAAATATGTCGTTTCGAAGATCAGAACGGTTGCTAGAACACGAAATTAACCATGATAATATTGTTATAACATGCCAGATAATGTCCCCGTTTCAAAGGTAGCGAAAATTCAACTAAGGGCATGTATAAAGGTAGAGTCTAATATGAGCTCTCTATATTAATTAATATCACTAGAGACTATTCTCCTA…	GGAGTGAAATGCAGTTGCGACGACTGACAGGCCGTCACTTTATGTTCCATGTACGATGAAGAGTTGAACGGCAGCATGCGTCAGCGTGTGAACAGTCTCTACTACGAAAACCATCTTTATGTACGAGGACCCTATAAACTACAGACGGATCATAATTAGTCGTGTCTGCAAAAATTGAATTACATTTTCGCATGCAGTTACAAAAGGGGAAAAAAATATGTCGTTTCGAAGATCAGAACGGTTGCTAGAACACGAAATTAACCATGATAATATTGTTATAACATGCCAGATAATGTCCCCGTTTCAAAGGTAGCGAAAATTCAACTAAGGGCATGTATAAAGATAAAGTCTAATATGAGCTCTCTATATTAATTAATATCACTAGAGACTATTCTCCTA…
56	Chr01	3415476	3346018	C	CGTGAAGGAAATCTCGTGCAAGCGTCGGTGTTC	32	TGGAGAGAGATGGGGAAGAAAGAAGAAGGTGTGAAATCATTGTCATGATTAATATTTGTGATGAACAATTGGCTTTGCAAAATGATTTAATCAATGAAGTGGTTTGGAAATTATGTGTGGATGTTGGTGTGAGTGCGTGTGACTAATGTGGGTCAGGTTATGATATCTGTGCCCAGAAACGGTTGTTTTGTTTGATTGTGTGCAGGTGACTTGAGGTCAGCCTTGGTTAATGGTGAGGACCGGGACTATACTCAGGGAGAAAGCAGAGGTCTAGTGCTGTCGGAATACCATGTGAGAAGGTGACTAGAGTCAGGATTCTTAGAGGTCAACTTCGATCAACAGTGGGGATCGGGACTAGACTCAGGAAGGAGTTGAGATCCAGACGGTCAAGGATACCGG…	GTGGAGAGAGATGGGGAAGAAAGAAGAAGGTGTGAAATCATTGTCATGATTAATATTTGTGATGAACAATTGGCTTTGCAAAATGATTTAATCAATGAAGTGGTTTGGAAATTATGTGTGGATGTTGGTGTGAGTGCGTGTGACTAATGTGGATCAGGTTATGATATCTGTGCCCAGAAACGGTTGTTTTGTCTGATTGTGTGCAGGTGACTTGAGATCAGCCTTGATCAATGGTGAGGACCGGGACTATGCTCAGGGAGAAGCAGAGGTCTAGTGCTGTCGGAATACCATGTGAGAAGGTGACTAGAGTCAGGATTCTTAGAGGTCAACTTCGATCAACAGTGGGGATCGGGACTAGACTCAGGGAGGAGTTGAGATCCAGACGGTCAAGGATACCGG…
57	Chr01	3427576	3358328	C	CTATATATATATATATATATATATATATATATATATATATATATATATATA	50	TATGAAAAAGCAAGGCCCAGTATTGAATGATGGAGTGAGAGTTGAAGAATATTATGGTGTTGCAAAAAAGACATGGGGGGAGAGAGAGAGAGAGCGAGGGAGAAAGTAAACAGATAAATAAGGACAAATCGGGATTAATGGCAGTACAAGAAAAAGTGTGAGGGTGACATTGCCACTACTCGTAAGAATATCTACCACAGTGCCTTCCTCATCTCATCACCATTCGCAAATAGTTCCAGCTGCCTGCGAGCGTACGCGTGCTCATAGAGTTCATGTATACAAATACAAGGTATAAACTATATTAAAAAAACATCGCTCTATGCAACCAACATACACCTAACTAACTGCATATTGACCAACGTACGTAGTATATACTCACGGATTTAATCATCATGTACG…	AGGCCCAGTATTGAATGATGGAGTGAGAGTTGAAGAATATTATGGTGTTGCAAAAAAGACATGGGGGGAGAGAGAGAGAGAGCGAGGGAGAAAGTAAACAGATAAATAAGGACAAATCGGGATTAATGGCAGTACAAGAAAAAGTGTGAGGGTGACATTGCCACTACTCGTAAGAATATCTACCACAGTGCCTTCCTCATCTCATCACCATTCGCAAATAGTTCCAGCTGCCTGCGAGCGTACGCGTGCTCATAGAGTTCATGTATACAAATACAAGGTATAAACTATATTAAAAAAACATCGCTCTATGCAACCAACATACACCTAACTAACTGCATATTGACCAACGTACGTAGTATATACTCACGGATTTAATCATCATGTACGTACGTACTTTAC…
58	Chr01	3438761	3369561	TAGCAATTTTCAGCTATGAATCTAGACACACCGTCCCAAAATAT	T	43	GAAGTCGTCAAAGTGTGAAGAATTTCTTCAACTGATGCACGCTCAGTAAGTTGTGTAGTCGCTTCTAATTCTGAATCAGCTGCATTATCTGCTCTGGCTAAAAGAGCTTGGCAACAATAACCCAATCCGAGTCCACAAGCTCCTTTTACAAGGTAGCTTTCAGTTTTTGAGATTACCTGAATGCAAAAAAAATGGCATTATATGAGAAACTATTCATGCATAATTGAAAGGTATCCTTGTTATATCCGATGATGTGAAAAATGATCTGCCAGCAACTGTAGCAAGTGGCATCATGAACGTCTTGAATTCAAAGGATTGGTCCAGTTGTACCCATCTTATCATAAATATTTGTTACTGCAGCATGAAGCAACACATCACAAGCTTATAAAAGTCCAGTGA…	GAAGTCGTCAAAGTGTGAAGAATTTCTTCAACTGATGCACGCTCAGTAAGTTGTGTAGTCACTTCTAATTCTGAATCAGCTGCATTATCTGCTCTGGCTAAAAGAGCTTGGCAACAATAACCCAATCCGAGTCCACAAGCTCCTTTTACAAGGTAGCTTTCAGTTTTTGAGATTACCTGAATGCAAAAAAAATGGCATTATATGAGAAACTATTCATGCATAATTGAAAGGTATCCTTGTTATATCCGATGATGTGAAAAATGATCTGCCAGCAACTGTAGCAAGTGGCATCATGAACGTCTTGAATTCAAAGGATTGGTCCAGTTGTACCCATCTTATCATAAATATTTGTTACTGCAGCATGAAGCAACACATCACAAGCTTATAAAAGTCCAGTGA…
59	Chr01	3480685	3420678	T	TAAACTTTCTACTTTTTTTTTAAACTTCTAACTTTTCCC	38	AGCCGAACAGGCCCATAGCCAGCTACAGTACGGATTTCAATACGTTATATGCCTATAAGAGGTGAAACCATATATTATATGATGTACTCCCTCCATCTTGTCGTTGACTTTTTTAAACGTGTTTGATCTTCGCTTTATTCAAAAACTTTTATAAATATTATTAAAAACTTGAGTAGTAGTATATTTAACAATGAATCAAATTATATGAAAACAATTAATAATTACTTAATTTTTTTTAATAAGATGAATGGTCAAACATATTTAAAAAAGTCAACGGCGCTAAATATTTAGGGACGGAGGGAGTACTAAATGTTTATATGTAACTACTATATGAATAAGCTATTAGATTGACTATAAATAATTTGGAGTTAGTAGTTGGCTATACTTGCTCTAACCTGA…	CCGAACAGGCCCATAGCCAGCTACAGTACGGATTTCAATACGTTATATGCCTATAAGAGGTGAAACCATATATTATATGATGTACTCCCTCTATCCTGTCGTTGACTTTTTTAAACGTGTTTGATCTTCGCCTTATTCAAAAACTTTTATAAATATTATTAAAAACTTGAGTAGTAGTATATTTAACAATGAATCAAATTATATGAAAACAATTAATAATTACTTAATTTTTTTAATAAGATGAATGGTCAAACATATTTAAAAAAGTCAACGGCGCTAAATATTTAGGGACGGAGGGAGTACTAAATGTTGTTTATATGTAACTATTATATGAATAAGCTATTAGATTTACTATAAATAATTTAGAGTTAGTAGTTGGCTATACTTGCTCTAACCTGA…
60	Chr01	3509634	3450257	ACTCCGTCACATCGTTCCAATTTCAACCAAACTTTCAATTTTGACGTGAACTAAA	A	54	TGCATGTATATGTGAAAGCTAGCTAGCTGCAGCTGGACTACGTGTCCTAGTAGTAGCTACTATCAACTCATCACTCTCTGAATTCGATCGAGAGAAAAAAGGACACACTCCGGCCAGTCCACTGAATGCTACTTCACCAGCTAAGCCAAAACTCCTTAAATAGTTCCACGCCAAAATTAGAAGTTTGAAGAAAAAAGTTTGGGTCGAATTTAGGCCCTGTTTAGTTCACACCAAACTTCCCCCCAACTCCCAACTTTCCATCAAATCATATCACATCCAAAACTTTCCTACACATATAAACTCCCAACTTTTTTTCCAAACTACCAACTTTCACCAAACTTCTCCCCAATTTCAAGAACTAAACATAGCCTTAGTTTCAAACTTTTTCTTCAAATTTCC…	TGCATGTATATGTGAAAGCTAGCTAGCTGCAGCTGGACTACGTGTCCTAGTAGTAGCTACTATCAACTCATCACTCTCTGAATTCGATCGAGAGAAAAAAGGGGACACTCCGGCCAGTCCACTGAATGCTACTTCACCAGCTAAGCCAAAACTCCTTAAATAGTTCCACGCCAAAATTAGAAGTTTGTTGAAAAAAGTTTGGGTCGAATTTAGGCCCTGTTTAGTTCACACCAAACTTCCCCCCAACTCCTAACTTTCCATCACATCATATCACATCCAAAACTTTCCTACACACATAAACTCCCAACTTTTTTTCCAAACTACCAACTTTTTCCAAACTTCTCCCCAATTTCAAGAACTAAACATAGCCTTAGTTTCAAACTTTTTCTTCAAATTTCC…
61	Chr01	4152134	4087496	G	GCCGTCCACACTCGGGGGAGGAGCCCGCCGGC	31	TTGGGGGACCTGTTGTACCCGATTTTGCGAGCAAGGGATGAAAATCGGACTAGGCAACAAATAGAGGAACCCAAAGAGGGACCCAAAGTGAACTTATTTCGGAGGTCTTTGACTCCCTCAACTATGATCCGAGTATGATTCATAGCCTCCAACCACAAAACTGGGTATATTGACTCCAACTATCAAAACCGATGCAAACTATATCCTTGGGTGGTTTTGAAAGCGGTTTTAGCTGACGTGGCACCCACGTGGCAGTGTTGACCCAGTCTTCGTCCCGCGTGTTGTCGACGTGTCGCTTATCTACATGTAATAAAAAAACTTGTGGGACCGACATGTCATTCACACAAAAATAAAATAGTGGGACCCACGGACATGTGGGCCCACATGTCATCCTCACCT…	TTGGGGGACCTGTTGTACCCGATTTTGCGAGCAAGGGATGAAAATCGGACTAGGCAACAAATAGAGGAACCCAAAGAGGGACCCAAAGTGAACTTATTTCGGAGGTCTTTGACTCCCTCAACTATGATCCGAGTATGATTCATAGCCTCCAACCACAAAACTGGGTATATTGACTCCAACTATCAAAACCGATGCAAACTATATCCTTGGGTGGTTTTGAAAGCGGTTTTAGCTGACGTGGCACCCACGTGGCAGTGTTGACCCAGTCTTCGTCCCGCGTGTTGTCGACGTGTCGCTTATCTACATGTAATAAAAAAACTTGTGGGACCGACATGTCATTCACACAAAAATAAAATAGTGGGACCCACGGACATGTGGGCCCACATGTCATCCTCACCT…
62	Chr01	4152237	4087631	G	GGCGTCCGCGCGCGGGGGTGGAGCTCGCCGGCCGTCCGCGCGCCG	44	GGTCTTTGACTCCCTCAACTATGATCCGAGTATGATTCATAGCCTCCAACCACAAAACTGGGTATATTGACTCCAACTATCAAAACCGATGCAAACTATATCCTTGGGTGGTTTTGAAAGCGGTTTTAGCTGACGTGGCACCCACGTGGCAGTGTTGACCCAGTCTTCGTCCCGCGTGTTGTCGACGTGTCGCTTATCTACATGTAATAAAAAAACTTGTGGGACCGACATGTCATTCACACAAAAATAAAATAGTGGGACCCACGGACATGTGGGCCCACATGTCATCCTCACCTCTCCCCCCCTCTCTCTTTCATCTTTTCCACTCCTCTCACCTTCCAATAGTAGAAGCGGGGCGGCGGCGATGGCGACGACGCACGGGGGAGGAGCTCGCCGGCG…	TGATTCATAGCCTCCAACCACAAAACTGGGTATATTGACTCCAACTATCAAAACCGATGCAAACTATATCCTTGGGTGGTTTTGAAAGCGGTTTTAGCTGACGTGGCACCCACGTGGCAGTGTTGACCCAGTCTTCGTCCCGCGTGTTGTCGACGTGTCGCTTATCTACATGTAATAAAAAAACTTGTGGGACCGACATGTCATTCACACAAAAATAAAATAGTGGGACCCACGGACATGTGGGCCCACATGTCATCCTCACCTCTCCCCCCCTCTCTCTTTCATCTTTTCCACTCCTCTCACCTTCCAATAGTAGAAGCGGGGCGGCGGCGATGGCGACGACGCACGGGGGAGGAGCTCGCCGGCCGTCCACACTCGGGGGAGGAGCCCGCCGGCCGT…
63	Chr01	4366604	4288958	ATATATATATATATATATATATATATATATATAT	A	33	TTGGTTTTGTAGTTGAGGGACCTCAAAAAATCTCGCTGTTAAATTGAGGGACCTCCGGTGAACTTATTCCCCTGCTGTGTGTGCTCGTACAAGACAATATGGCCCATTAGCTGGCGCCATAGCCCCAATGTATTCAGGCTCTGTTTATTTTAGCTTAGGATTATTATAATCTAAATTATTAAGAGTAAGCTGAAACAAACAGATAGCTTATTATGATATATTATTACTACTTCCTCCATTTCGTATTATAAGATTTTTCTAGCATTGCCCACATTCATATATATGTTAATGAATCTAGACATATATGTGTGCCTAGATTTATTAATATATAAACAAGTTCAAATTCAGTTCAAACTTGCTTTGAACTAGTTAGTAAAGTAGTTAATGTTAATATCTAAG…	TTGGTTTTGTAGTTGAGGGACCTCAAAAAATCTCGCTGTTAAATTGAGGGACCTCCGGTGAACTTATTCCCCTGCTATGTGTGCTCGTACAAGACAATATGGCCCATTAGCTGGCGCCATAGCCCCAGTGTATTCAGGCTCTGTTTGTTTTAGCTTAGGATTATTATAATCTAAATTATTAAGAGTAAGCTGAAACAAACATATAGCTTATTATGATATATTATTACTACTTCCTCCATTTCGTATTATAAGATTTTTCTAGCATTGCCCACATTCATATATGTGTTAATGAATCTAGACATATATGTGTGCCTAGATTTATTAATATATAAACAAGTTCAAATTCAGTTCAAACTTGCTTTGAACTAGTTAGTAAAGTAGTTAATGTTAATATCTAAG…
64	Chr01	4502751	4437051	A	ATGAGTGAGGAATTTGCTCGATTCTATAACCTAATCATCTGA	41	GTGGTAACTCACGCCCTCCCCTCCGCGTCGCCCCCGCCACGGCGAGGCTCCTCGGCCACCCCGCGCGGAAGGGGGCCGCGGCGCCGCCCGGATCGAGGTGCCGCGCGGAGGCGGAGGCGGAGGCCACAGCCGCCTCCGATGCTGCCTGCCCTAACCCGCCGCGGCGTGGGTGCGAAGAGACGAACCCGAACCCGAACCCTAAGAGAAACCCTAAGCCGGCGGAGAGAGGGGAGGAGCCGCCCGTCCGCGCCGTCGGCTGCGGCGGATTCGCCTTCCTCTGCGCCCTCGCTGGCCACACCGAGGTGATTATTGTCTCCCCCCACTCAACTATTTTCTGCGATGAATTTGCGTCGATTCTATAACCTAATCATATGATGAGTGAGGATTTTGCTATATTCT…	GTGGTAACTCACGCCCTCCCCTCCGCGTCGCCCCCGCCACGGCGAGGCTCCTCGGCCACCCCGCGCGGAAGGGGGCCGCGGCGCCGCCCGGATCGAGGTGCCGCGCGGAGGCGGAGGCGGAGGCCACAGCCGCCTCCGATGCTGCCTGCCCTAACCCGCCGCGGCGTGGGTGCGAAGAGACGAACCCGAACCCGAACCCTAAGAGAAACCCTAAGCCGGCGGAGAGAGGGGAGGAGCCGCCCGTCCGCGCCGTCGGCTGCGGCGGATTCGCCTTCCTCTGCGCCCTCGCTGGCCACACCGAGGTGATTATTGTCTCCCCCCACTCAACTATTTTCTGCGATGAATTTGCGTCGATTCTATAACCTAATCATATGATGAGTGAGGATTTTGCTATATTCT…
65	Chr01	4537149	4471534	GTAACCATCTAGTTGACATGCAATAAACGGGTGAACGT	G	37	CCACGGTTATTATTACCGATGAAAATCAGCGAAATTCGATAAAAAATTGCCAACCATTTAAATTTTGATTTTACATCTTTCTGGGCTAAATGCCTGTCTACAGCTAGAAGACCTGCTTGGCCAGAAAATTGGCCACGGCGTCGAGGATGACGTAGGCACGACTGTGGTGTCGGATCGCTGTCATGAGCTGGGAAACTGTTTTAACAAAACAGCTCGAGTGGATGTATACCCATTTATTACATGTCATCTAAATTGTTATGAAAAAATAGAAAAAATATGAACAAGATAGATCAATATGTAATATATCAATGCACAAATATGCAAGTTAAAATTCAACTTCTACAAATTGTAACAAAAATAACAAACAAAACTCAAATTAATATATGTATATTTACAATT…	CCACGGTTATTATTACCGATGAAAATCAGCGAAATTCGATAAAAAATTGCCAACCATTTAAATTTTGATTTTACATCTTTCTGGGCTAAATGCCTGTCTACAGCTAGAAGACCTGCTTGGCCAGAAAATTGGCCACGGCGTCGAGGATGACGTAGGCACGACTGTGGTGTCGGATCGCTGTCATGAGCTGGGAAACTGTTTTAACAAAACAGCTCGAGTGGATGTATACCCATTTATTATATGTCATCTAAATTGTTATGAAAAAATAGAAAAAATATAAACAAGATAGATCAATATGTAATATATCAATGCACAAATATGCAAGTTAAAATTCAACTTCTACAAATTGTAACAAAAATAACAAACAAAACTCAAATTAATATATGTATATTTACAATT…
66	Chr01	4561916	4496269	GCTCTGTTTAGATTCCAACCTATTTTTTTCACCA	G	33	TGGTGTGCTACACGATTTTTTATTATTGTGCATATGAAAAACGAGGCACTCCATTCAAAATTTGCGCAAGAGTTCCGTCAAAAAAAAAAGAAATTGCGCAAGAGAAAGGTGGGTCTTCTACAATTTTGCTGCTGCCACGCTATTTGACTCGTGCACAGTGACCTCGCGTTTTATGGACACAATATCCCACCCCAATTAAATTGCCCGTGGCTCGTGGGGGTCACACGACACGAGGAGAGAGAGAGAGAGGTGTGTGTCAGTGCGATGTCGCAGTCTCGCAGAAATCTCGCACAAGCGTGCTACTCGCTTGTTCTAAAATATATAAAAAGTTTTGAGATTAAACACAATTATTAGAAAAATATATAAAATTAAAATAAAATAATATTATAATTAGTTGAA…	TTGGTGTGCTACACGATTTTTTATTATTGTGCATATGAAAAACGAGGCACTCCATTCAAAATTTGCGCAAGAGTTCCGTCAAAAAAAAAAGAAATTGCGCAAGAGAAAGGTGGGTCTTCTACAATTTTGCTGCTGCCACGCTATTTGACTCGTGCACAGTGACCTCGCATTTTATGGACACAATATCCCACCCCAATTAAATTGCCCGTGGCTCGTGGGGGTCACACGACACGAGGAGAGAGAGAGAGAGGTGTGTGTCAGTGCGATGTCGCAGTCTCGCAGAAATCTCGCACAAGCGTGCTACTCGCTTGTTCTAAAATATATAAAAAGTTTTGAGATTAAACACAATTATTAAAAAAATATATAAAATTAAAATAAAATAATATTATAATTAGTTGA…
67	Chr01	4561981	4496276	CCTTTGGGAGTCCCTGGTTATGAGTACAAGC	C	30	GCAAGAGTTCCGTCAAAAAAAAAAGAAATTGCGCAAGAGAAAGGTGGGTCTTCTACAATTTTGCTGCTGCCACGCTATTTGACTCGTGCACAGTGACCTCGCGTTTTATGGACACAATATCCCACCCCAATTAAATTGCCCGTGGCTCGTGGGGGTCACACGACACGAGGAGAGAGAGAGAGAGGTGTGTGTCAGTGCGATGTCGCAGTCTCGCAGAAATCTCGCACAAGCGTGCTACTCGCTTGTTCTAAAATATATAAAAAGTTTTGAGATTAAACACAATTATTAGAAAAATATATAAAATTAAAATAAAATAATATTATAATTAGTTGAAAAATGAGGATAAATGAAAAAAAAGAATGATATGGAACTGTGATTGGTTGGAAAGAAAATAAAGTT…	GCTACACGATTTTTTATTATTGTGCATATGAAAAACGAGGCACTCCATTCAAAATTTGCGCAAGAGTTCCGTCAAAAAAAAAAGAAATTGCGCAAGAGAAAGGTGGGTCTTCTACAATTTTGCTGCTGCCACGCTATTTGACTCGTGCACAGTGACCTCGCATTTTATGGACACAATATCCCACCCCAATTAAATTGCCCGTGGCTCGTGGGGGTCACACGACACGAGGAGAGAGAGAGAGAGGTGTGTGTCAGTGCGATGTCGCAGTCTCGCAGAAATCTCGCACAAGCGTGCTACTCGCTTGTTCTAAAATATATAAAAAGTTTTGAGATTAAACACAATTATTAAAAAAATATATAAAATTAAAATAAAATAATATTATAATTAGTTGAAAAATGA…
68	Chr01	4633520	4570562	TAAATATTGCTAGTAACAGTGGAGTATAAAATATG	T	34	ATTTTTTTATAGAAACAAGATGTTAAAATTGTGTTTTGAAGACTCTATTAAAAGTGATTTTTTTATAAGTATGGAGGGAGTATACTGCTGGTAGGTCAATACTAGTTCGATCCGGTTCTCCAATGGCTGCGTCACAGTGGCATTGCCATGGCTCATTGGCTCTGCTTTGCAGCTTTGCTGCGTGTCGCAGTGTCCGTGTGGATGATGAACACACAAACACACACACGCAGTGAAGAATTTGAATACTACCTCCGTTCTAAAATGTAGCTATTTTTAGCATAGTACTTTGTCTTAAAATGAAGCTATTTTTCTACCTATCTTCTCCTCTCAACCAATCACAACCATTTTTTTTACCTACTTTCTCTTTTCAACCAATCACACACATTCTTCAATCATTCT…	ATTTTTTTATAGAAACAAGATGTCAAAATTGTGTTTTGAAGACCCTATCAAAAATGATTTTTTTTATAAGTATGGAGGGAGTATACTGCTGGTAGGTCAATACTAGTTCGATCCGGTTCTCCAATGGCTGCGTCACAGTGGCATTGCCATCGCTCATTGGCTCTGCTTTGCAGCTTTGCTGCGTGTCGCAGTGTCCGTGTGGATGATGAACACACAAACACACACGCAGTGAAGAATTTGAATACTACCTCCGTTCTAAAATGTAGCTATTTCTAGCATAGTACTTTATCTTAAAATGAAGCTATTTTTCTACCTATCTTCTCCTCTCAATCAATCACAACCATTCTTTTTCACCTACTTTCTCTTTTCAACCAATCACACACATTCTTCAATCATTCT…
69	Chr01	4649966	4586980	C	CATTAGTTGACCCCCAAAATTTGATTTTGATTCCTT	35	CAATTTTAAACGAGAAAAAAAGGCTATTTTTTGCATGCAGATGCAGTAAAAAATCATGTAAACAATTTCTGGAGTCTGGACATAGCAAATGAAAGATTAAGGACATGCGTAGTGGTTAATTTCAAAGTAGTGATAGAATCATAGAATTGCCATACAATCTAATGATCTCTCTCAAAGAGCAAAATATGTAGATGGAAATTATATTACTGGCATATAATACGAAATGAACCAATCACGAAAGAGCTACTAATAAATTTGCCAGAATTCCATATCTCAAAGAGCAAAATATGGAGATGGAAATTATAGGACTATGGCATATAAATACGAAATGAACCAATCACGAAAGAGCTACTACTAAATTTGCCAGAATTTATTTTTATGATTACTGCTTCAGAATGA…	AAAAGGCTATTTTTTGCATGCAGATGCAGTAAAAGATCATGTAAACAATTTCTGGAGTCTGGACATAGCAAATGAAAGATTAAGGACATGCGTAGTGGTTAATTTCAAAGTAGTGATAGAATCATAGAATTGCCATACAATCTAATGATCTCTCTCAAAGAGCAAAATATCTCAAAGAGCAAAATATGTAGATGGAAATTATAGGACTGGCATATAATACGAAATGAACCAATCACGAAAGAGCTACTAATAAATTTGCCAGAATTCCATATCTCAAAGAGCAAAATATGGAGATGGAAATTATAGGACTATGGCATATAAATACGAAATGAACCAATCACGAAAGAGCTACTACTAAATTTGCCAGAATTTATTTTTATGATTACTGCTTCAGAATGA…
70	Chr01	5049092	4619746	A	ATATATATATATATATATATATATATACACATATACATACATACACATATACAT	53	GCTTTTAAAATTATATGGATATGGTTTCCTATAGCCCATTCTGAAGGAAAAATAAGTATGAGTTCCTTGGCCCCAGTTGATTTAAATTAATGAGCTAGCAGATTATGGATTTGATTATAGGGATAAATTACATATTTTAAGAAAGGTTAAGTTGCATTCATGGTACATTAATTTGGCATGCGAGTGTAATTTAGTACATGAACGTGAGAAGTGAGAGTTGTAGTGTGATAAGGGTGTGATTTAGTTGAAGAACTAATAAGTGAGCATATGGGTACAACAACTTACAAGATAGGTTCGATTATGGTACAATAACTTAAAAAATGATATAACAATTAATTTTTTTAGCATTTTGTCATACATATTCAGTTTTTAAGTACTAATTTTGTCAATATAATCGTG…	GCTTTTAAAATTATATGGATATGGTTTCCTATAGCCCATTCTGAAGGAAAAATAAGTATGAGTTCCTTGGCCCCAGTTGATTTAAATTAATGAGCTAGCAGATTATGGATTTGATTATAGGGATAAATTACATATTTTAAGAAAGGTTAAGTTGCATTCATGGTACATTAATTTGGCATGCGAGTGTAATTTAGTACATGAACGTGAGAAGTGAGAGTTGTAGTGTGATAAGGGTGCGATTTAGTTGAAGAACTAATAAGTGAGCATATGGGTACAACAACTTACAAGATAGGTTCGATTATGGTACAATAACTTAAAAAATGATATAACAATTAATTTTTTTAGCATTTTGTCATACATATTCAGTTTTTAAGTACTAATTTTGTCAATATAATCGTG…
71	Chr01	5149371	4737902	T	TTGACTTTTTCTCACATGTTTGACCATTCGTCTTATTCAAAAA	42	ATAATGTCACAAAACAGTATATTGGTAATGCAAAAACAATGTACCAACAGTCATTTGCTTCCCATATGAGGGGCAACAAGAACGAAAATGGTATCAATTTAATTAAGCGGACAAGTTAGAGCCAAAGATGACCCGAACTAAGGTGGTGAGGATGTAGTGGTGTACATCCACACTTCCCACCAACTGAGCTAAGGTTCAGTTCCTTCTTTCTGTAACTTTATCACAAAGTCGTAATGATGTTTCAGGCATGTGTACATATGTATGAGCAACACCATGATTGTTCCTTTCTCTTACTAGTATGCTGCACTTTGATGAATTGTGTTTGTCAAACTTTTTCACTGGTGTGCATGTGCTCACCTTATACCTTATAAACAATCAGATAATCCACAAATGCTTCTG…	ATAATGTCACAAAACAGTATATTGGTAATGCAAAAACAATGTACCAACAGTCATTTGCTTCCCATATGAGGGGCAACAAGAACGAAAATGGTATCAATTTAATTAAGCGGACAAGTTAGAGCCAAAGATGACCCGAACTAAGGTGGTGAGGATGTAGTGGTGTACATCCACACTTCCCACCAACTGAGCTAGGGTTCAGTTCCTTCTTTCTGTAACTTTATCACAAAGTCGTAATGATGTTTCAGGCATGTGTACATATGTATGAGCAACACCATGATTGTTCCTTTCTCTTACTAGTATGCTGCACTTTGATGAATTGTGTTTGTCAAACTTTTTCACTGGTGTGCATGTGCTCACCTTATACCTTATAAACAATCAGATAATCCACAAATGCTTCTG…
72	Chr01	5193689	4777580	A	AGAGAGAGAGAGAGAGAGAGAGAGAGAGAGAGAGAGAGAGAGAGAGAGA	48	TGACTCTTCATTCTTCCACACGTGATTGGCTACATGGGCATTGAGACATGTAAATATTAATGAATCGCTTGTTTACGAGGAATGACTAGTAGCATATTTAAATGGATGATAAGTAGAATTACTTATCCTTGTTCTGTGTGCCAAGATAAAAATATAACTATCAAAAGTAGATGAAGAGAGTATTATTCTAACACAGAACTCCCGAAGATCCTTAGAGGTGAAAATCAAGGAGACCACAACTTGGGTATTAGGAGCAAAAGACGCATACCTTATCTTTTTTTTTTCTTATTATTTGTACAACAACTTGTACTCCTACTATTTCCAATGAAATTGACACCCTCTAATTAAATAACGGTTCATTAAAAATAGTTGCTTCGAATTGGTACAATTTAAGCACGA…	GACTCTTCATTCTTCCACACGTGATTGGCTACATGGGCATTGAGACATGTAAATATTAATGAATCGCTTGTTTACGAGGAATGACTAGTAGCATATTTAAATGGATGATAAGTAGAATTACTTATCCTTCTTCTGTGTGCCAAGATAAAAATATAACTATCAAAAGTAGATGGAGAGAGTATTATTCTAACACAGAACTCCCGAAGATCCTTAGAGGTGAAAATCAAGGAGACCAAAACTTGGGTATTAGGAGCAAAAGACGCATACCTTATCTTTTTTTTTTTCTTATTATTTGTACAACAACTTGTACTCCTACTATTTCCAATGAAATTGACACCCTCTAATTAAATACCGGTTCATTAAAAATAGTTGCTTCGAATTGGTACAATTTAAGCACGA…
73	Chr01	5196417	4780346	ATATATATATATATATATATATATATATATATGTATATGTATGTA	A	44	AACAAAACAAATTACAGATTCTGTCTGTAAACTGCAAGATGAATTTATTAAGCCTAATTAATCCATCATTAGTAAATATTTACTGTAGCATCACATTCTTAAATCATGGCGCAATTAGACTCAAAAGATTCGTCTCGTAATTTACATGCAAACTGTGCAATTGGTTTTTATTTTTATCGACATTTAATATTCTATGTATGTGTACAGATATTCGATGTGATAAAATTTTTGGAAGTTTGAAGGGAAGCCTTAGTCGCGTATAAATAATGTTGGCGACTATGGAGCACGTTGAAGATGGGAGCAACAGGGACAACGTGATTAAACTGCAGAGTCGTAGTTTGATCGTCAGTGCTTACGCAGCATGCACGCTTAATTTCAGTATTTCACACGCGGCACATA…	AAACAAATTACAGATTCTGTCTGTAAACTGCAAGATGAATTTATTAAGCCTAATTAATCCATCATTAGTAAATATTTACTGTAGCATCACATTCTTAAATCATGGCGCAATTAGACTCAAAAGATTCGTCTCGTAATTTACATGCAAACTGTGTAATTGGTTTTTATTTTTATCGACATTTAATATTCTATGTATGTGTACAGATATTCGATGTGATGGAATTTTTGGAAGTTTGAAGGGAAGCCTTAGTCGCGTATAAATAATGTTGGCGACTATGGAGCACGTTGAAGATGGGAGCAACAGGGACAACGTGATTAAACTGCAGAGTCGTAGTTTGATCGTCAGTGCTTACGCAGCATGCACGCTTAATTTCAGTATTTCACACGCGGCACATATATA…
74	Chr01	5196503	4780388	ATATATATATATATATATATATATATATATATATATGTATGTATG	A	44	AGCATCACATTCTTAAATCATGGCGCAATTAGACTCAAAAGATTCGTCTCGTAATTTACATGCAAACTGTGCAATTGGTTTTTATTTTTATCGACATTTAATATTCTATGTATGTGTACAGATATTCGATGTGATAAAATTTTTGGAAGTTTGAAGGGAAGCCTTAGTCGCGTATAAATAATGTTGGCGACTATGGAGCACGTTGAAGATGGGAGCAACAGGGACAACGTGATTAAACTGCAGAGTCGTAGTTTGATCGTCAGTGCTTACGCAGCATGCACGCTTAATTTCAGTATTTCACACGCGGCACATATATATATACATATACATACATATATACATATGTATTATATATATATATATATATATATATATATATATATATATATATATATATAT…	ATTAAGCCTAATTAATCCATCATTAGTAAATATTTACTGTAGCATCACATTCTTAAATCATGGCGCAATTAGACTCAAAAGATTCGTCTCGTAATTTACATGCAAACTGTGTAATTGGTTTTTATTTTTATCGACATTTAATATTCTATGTATGTGTACAGATATTCGATGTGATGGAATTTTTGGAAGTTTGAAGGGAAGCCTTAGTCGCGTATAAATAATGTTGGCGACTATGGAGCACGTTGAAGATGGGAGCAACAGGGACAACGTGATTAAACTGCAGAGTCGTAGTTTGATCGTCAGTGCTTACGCAGCATGCACGCTTAATTTCAGTATTTCACACGCGGCACATATATATATATACATATACATACATATATACATATATATATTATATAT…
75	Chr01	5202117	4785864	G	GCTTTGCCATCGCGTCGTCGGGATCGTGTACTCGTCGTAGCCACCA	45	GAGGATCCTCTATCATAGGCTTTACTTTGTTTAGTTACCAATTTTTTTTTTCCAAAAAGGTCATATCGAATCTTTGTATACATGCATGAAGCATTAAGTATAGATAAATGAAAAAAAACTAATTGCACAGTTTGCATGGAAATCGCGAGACGAATTTTTTTGAGCCTAATTAGTCTATGATTAGCCATAAGTGCTACATTAACCCATATGTGGTAATGATGGATTAATTAGGTTCAAAAAATTCGTCTCACGGTTTTCATGCGAGTTATGAAATTAGTTTTTTTATTCATTTCCAAAAACTCCTTCCGACATCTAGTCAAACGTCCGATTTAACACTAAATTAAGGCCATGATATTACTACCATTATAATCACCGATATGTAATTCTCACTCTTCTATT…	GAGGATCCTCTATCATAGGCTTTACTTTGTTTAGTTACCAATTTTTTTTTCCAAAAAGGTCATATCGAATCTTTGTATACATGCATGAAGCATTAAGTATAGATAAATGAAAAAAAACTAATTGCACAGTTTGCATGGAAATCGCGAGACGAATTTTTTGAGCCTAATTAGTCTATGATTAGCCATAAGTGCTACATTAACCTATATGTGGTAATGATGAATTAATTAGGTTCAAAAGATTCGTCTCACGGTTTTCATGCGAGTTATGAAATTAGTTTTTTTATTCATTTCCAAAAACTCCTTCCGACATCTAGTCAAACGTCCGATTTAACACTAAATTAAGGCCATGATATTACTACCATTATAATCACCGATATGTAATTCTCACTCTTCTATTGT…
76	Chr01	5236177	4820594	GGTATATATATATATATATATATATATATATATATATATATATATATAT	G	48	AGAAGGTGATATCGATGAGCTATATATACACTGGCCATGCACGGGAAAGCGAGCGAGCGCGGATCAGATTGCGTACGTCGGCGTGGATGATGAGCCCGTGACATGATCGACGAGGAACGGAGCGAGCTGGAAAAAGAAGGGAGGGGAAAGAGGGAGAGGTCGCTTGAATGCCCTAGATTACTCTCACTCCCAGGCTCTCAGCATCCATTGGCTAATTAAGATCATATCGAACAATGGGCAATGACTAACTCAATTGGCCATGCAGTGTCACCGAGATTGCTGCGTGTTTGGACGCCTAGCTCGTGCTCGTGAGCTAGATGCTAAAGTAGATGCTCGAGTTTTCTTGGCCACGAGTAATCAGAAGAACTCCTGTGTCCATCGATCTGTGTGGTTACAACC…	AGAAGGTGATATCGATGAGCTATATATACACTGGCCGTGCACGGGAAAGCGAGCGAGCGCGGATCAGATTGCGTACGTCGGCGTGGATGATGAGCCCGTGACATGATCGACGAGGAACGGAGCGAGCTGGAAAAAGAAGGGAGGGGAAAGAGGGAGAGGTCGCTTGAATGCCCTAGATTACTCTCACTCTCAGGCTCTCAGCATCCATTGGCTAATTAAGATCATATCGAACAATGGGCAATGACTAACTCAATTGGCCATGCAGTGTCACCGAGATTGCTGCGTGTTTGGACGCCTAGCTCGTGCTCGTGAGCTAGATGCTAAAGTAGATGCTCGAGTTTTCTTGGCCACGAGTAATCAGAAGAACTCCTGTGTCCATCGATCTGTGTGGTTACAACC…
77	Chr01	5260427	4844789	ATTGATAAGATGATAAGATTATTAATGCATTCCA	A	33	TGACCAGCTTGTTTGCCTTTACAATAAGTTGTTCCCGAGTTAGTCTCTATCGTTCTGATTCCATTTCAAAGAAAAAAAAAAGAAGAAGCCATTTTTATCCCTGCTCCGAACAGAGAATGTATCCACTATCGATCCGTACAAAAACTAGCACCGCGGTTCTCAAAATCCAAAACATTTGTACACGCTGTTTCATGAGATTACGTACGTAAATTGCACTAGTTGTAATATTATATATCCGTTTTGCATTGGGGTGTATAATGAAATGAAATCAAAGGAAGGTCCAGTTGATGAACATGAAGCAGATGCAGTGGGCGCCGCCGCCGTCGCCGTCGACCACCTTCCACGCCACCGCCTTCTCGTACGACGCCGCCCTCCCAACGCTCGACACGCACACCCCTC…	TGACCAGCTTGTTTGCCTTTACAATAAGTTGTTCCCGAGTTAGTCTCTATCGTTCTGATTCCATTTCAAAGAAAAAAAAAAGAAGAAGCCATTTTTATCCCTACTCCGAACAGAGAATGTATCCACTATCGATCCGTACAAAAACTAGCACCGCGGTTCTCAAAATCCAAAACATTTGTACACGCTGTTTCATGAGATTACGTACGTAAATTGCACTAGTTGTAATATTATATATCCGTTTTGCATTGGGGTGTATAATGAAATGAAATCAAAGGAAGGTCCAGTTGATGAACGTGAAGCAGATGCAGTGGGCGCCGCCGCCGTCGCCGTCGACCACCTTCCACGCCACCGCCTTCTCGTACGACGCCGCCCTCCCAACGCTCGACACGCACACCCCTC…
78	Chr01	5265315	4849654	CAAAACATTATGATGATCTTCGTGTGTCATTATCACTTTACCATC	C	44	CACCTGCTCCGGCGTGTACCTCACGTACTTGCTCGCGTCCATCGCCGCCGCCGACGCCACCATGCCAGATCGATCGAGCTCAATGCAAGCAAGCTAGGCTATAGCCGAGAAGGCGTAGAGCTCGATGGCGACATCGAGGTGAGGGGGGGAAGGAGAGCTTCGTGTTGTTCGTCGTCTCGTCGCCTTTAAACGCGAGGACGGCGGTGGCGCGGCGCGCGCGCGCTAATAAATTGCGGGAAAAAGGAAAGTTCCCGGCTGCGACGTCGCCGGCGAATGCACATTTGGCACATGTAATTTTCTTTTTTTTTTAAAAAAAAACAAACATTTTTTCAAAAAAATTTTATATTCCATCCATCCCATAATATAACCTAGAATTAGATAAGACATTTCATATTACAA…	GCGTGTACCTCACGTACTTGCTCGCGTCCATCGCCGCCGCCGACGCCACCATGCCAGATCGATCGAGCTCAATGCAAGCAAGCTAGGCTATAGCCGAGAAGGCGTAGAGCTCGATGGCGACATCGAGGTGAGGGGGGGGGGGGGGGGGGGAAGGAGAGCTTCGTGTTGTTCGTCGTCTCGTCGCCTTTAAACGCGAGGACGGCGGTGGCGCGGCGCGCGCGCGCTAATAAATTGCGGGAAAAAGGAAAGTTCCCGGCTGCGACGTCGCCGGCGAATGCACATTTGGCACATGTAATTTTCTTTTTTTTTAAAAAAAAACAAACATTTTTTCAAAAAAATTTTATATTCCATCCATCCCGTAATATAACCTAGAATCGGATAAGACATTTCATATTACAA…
79	Chr01	5283521	4866523	GTTTACGCGGTTTCTACGCCAAATTAAGGTGG	G	31	ACATATTCATGTGCGCATTTTGAGTATTAAAAAATATCAATCCGGATGACCACTTGGGGAAAACATTTGGCCTGTCCTTCTTGCACAACGAGCTGCAGACTCTAATAAGACAAAAAAGAACTACATAATATGGTTGACTATAATTAGTTAATTATATACCTTAACTTATCCCAGTACAAAATCCAGCTTTTTAAAACTAAATTCTACAGGCGAATGTTTCTTTCCCCTGTCGTTGATGAAATAATTTTCTTGTTGAAGTGTACGTATACACGCTAGCTACGTGTACAGCCGTCCAGAATCTCGGAGGATTACGTCGATGTGCCATCATTTTCTAGCTGTGGATGAACACTGCCACAGAAATAATCCGCTGTTAAGTGTAGGTGTTTCTTTTCTATTTAG…	ACATATTCATGTGCGCATTTTGAGTATTAAAAAATATCAATCCGGATGACCACTTGGGGAAAACATTTGGCCTGTCCTTCTTGCACAACGAGCTGCAGACTCTAATAAGACAAAAAAGAACTACATAATATGGTTGACTATAATTAGTTAATTATATACCTTAACTTATCCCAGTACAAAATCCAGCTTTTTAAAACTAAATTCTACAGACGAATGTTTCTTTCCCCTGTCGTTGATGAAATAATTTTCTTGTTGAAGTGTACGTATACACGCTAGCTACGTGTACAGCCGTCCAGAATCTCGGAGGATTACGTCGATGTGCCATCATTTTCTAGCTGTGGATGAACACTGCCACAGAAATAATCCGCTGTTAAGTGTAGGTGTTTTTTTTCTATTTAG…
80	Chr01	5293167	4876149	AGACAGTCAGACGAGATGAGCTTGCAATGCTCCTTGCTTGG	A	40	CTAATTAACTATATTTCTGAACAGGTTACAGATAGGAGTATATAGATACAGGAGACAGGAGCACATCACTCCAAATTACAGGTGTCAATGGAGACGAAAAGAATACATTATTTTACTGCAATTTTAGTTGAAAACCTATATATGCCTTGCATACTATCCAATCAGATCAGATTATTTAATAGTAATAATAATGATAATCTTCTAAATGATGGTGAGTGGTATCATCTCATCATCAGCTTTGCTCATGCATGCATGGCTTCCCAAATGAGACAACACCTGCATCCCATTCAAGTTCAGCTCCCAGATCAACCTCGACTGCAATCATTGCAGAGCTACCAACCAAACCACCCCAAAATACAAGATCATATATCCAAATGTAATATAAATCCAGCCAAATTG…	CACCTAATTAACTATATTTCTGAACAGGTTACAGATAGGAGTATATAGATACAGGAGACAGGAGCACATCACTCCAAATTACAGGTGTCAATGGAGACGAAAAGAATACATTATTTTACTGCAATTTTAGTTGAAAACCTATATATGCCTTGCATACTATCCAATCAGATCAGATTATTTAATAGTAATAATAATAATAATCTTCTAAATGATGGTGAGTGGTATCATCTCATCATCAGCTTTGCTCATGCATGCATGGCTTCCCAAATGAGACAACACCTGCATCCCATTCAAGTTCAGCTCCCAGATCAACCTCGACTGCAATCATTGCAGAGCTACCAACCAAACCACCCCAAAATACACGATCATATATCCAAATGTAATATAAATCCAGCCAAA…
81	Chr01	5302762	4885046	C	CACGCCACGCCGCCACGCGGCCACCGCGCCGTCCCGCCGCCGTCCGCT	47	CTCATCAATCGGGAATAAAGATCTAGGGGTATATATATTCCCGATGCGCGCCCTCGTCTTCTCCACCAACACTTAGAAGTTTTTGCCCGATCGATCTCTCTCGGCTTCTCCTTCGCCGCCACTGCCTAGGGCATCCCCGCGCCAACGCCGCCGCCGTATCTCGCCGTCGTCTCGCGCTCGTCGTCGTCGCTGCCGCCTCCGCCTCCTCCTCCGCCGCCGCATCTCTGGGGTGAGAGCCGACGCCGCCTCCCTCTCATCAGCTCTCTCTCTCCGATCTCGATCTCTCTCTCTCCCTCTCGGTTGCCGCCGGCCGCCTCGACGCCGACGCCGACGCCAACGTCGTCACGACATGACGCGGCGGCACGACACGACGAGACGCCACGACGCCGCCGCGGCACG…	CCGGGAATAAAGATCTAGGGGTATATATATTCCTGATGCGCGCCCTCATCTTCTCCACCAACACTTAGAAGTTTTTGCCCGATCAATCTCTCTCGGCTTCTCCTTCGCCGCCACTGCCTAGGGCATCCCCGCGCCAATGCCACCGCTGTATCTCGTCGTCGTCTCGCGCTCGTCGTCGTCGCCGCCGCCTCCGCCTCCTCCTCCGCCGCCGCATCTCTGGGGTGAGAGCCGATGCCGCCTCACTCTCATCAGCTCTCTCTCTCTCCGATCTCGATCTCTCTCTCTCTCCCTCTCGGTTGCTGCCGGCCGCCTCGACACCGACGCCGACGCCAACGTCGTCATGACATGACGCCGCGGCACGACGCCGCGGCGGCACGACACGACGCCGCCGTGGCACGG…
82	Chr01	5358050	4962848	CCCTCCTCCCGCCGCCCCCTCTGCTGCCCCCTCCTCCGCCGCCT	C	43	TCTCTCTATCTCTTTCCCTCTCACCCCCCTCTCTCTCATCAGATGCTGGTGCCTACGGCTCGCGTGCCGGCGGCAGCGAGCGCCTCCTCCGTCGCCCAAGCTCCGCCGGCCGCCGCCCTTGGCTCGTTCCGCCGCCTTCTCCACCTCCTCGAGCGTCACTGGCTGCAGGCGTCCCCAACATTGCCTTGACGAGCCGCGCGCTGTCGGCTACAGGCACCCCCACCACCACCTCGAGCTCCATCCTCCGCCGTCCCCTCCACTGCCTCCTCCTCCCGCCGCTTCGAGCTCCGCCGTCCCCTTCACTACCCCTCCTCCCGCCGCTTCAAGCTCCTCCGCACCCTCCACTGCCTCCTCCTCCCACCGCCCGAGCTCCGCCCATCGCCGTCCTCTGCTTGCTCC…	CTTCTCTCTATCTCTTTCCCTCTCACCCCTTCTCTCTCATCAGATGCCGGTGCCTGCGGCTCGGGTGCCGGCGGCAGCGAGCGCCTCTTCCGTCGCCCAAGCTCCGCCCGCCGCCGCCCTTGGCTCGTTCCGCCGCCTTCTCCACCTCCTCGAGCGTCACTGGCTACGGGCGTCCCCAACGTTGCCTTGACGAGCCGCGCGCTGTCGGCTACAGGCACCCCCACCACCACCTCGAGCTCCATCCTCCGCCGTCCCCTCCACTGCCTCTTCCTCCCGCCGCTTCGAGCTCCGCCACCCCCTTCACTACCCCTCCTCCCACCGCTTCAAGCTCCGCCGCACCCTCCACTGCCCCCTCCTCCCGCCGCCCGAGCTCCGCCCATCGCCGTCCTCTGCTTGCTC…
83	Chr01	5385362	5003470	TCAGCCCATCCACGTCCACCTTATCCATCAATCTATC	T	36	CACTACTGTTGATTATGCACACCATGCATGGATAGATCACTTTAAAGTTAAACCAGTGGTCTGATTTCAGCAGCAAAGCACAACGCGCAGGGTTCAGGTTTGCCTTTGCAGTTTAATTTGCATATATCCTGTTGCATTGCAACAGTATGTGCTGTTCTTCAGGTGCAGACATGTACAGTAGTGCTAGTATGCTGTATGTAGCACAAGCATTCATTGTAGGGGTGAAAACGGAGCGGATATTATCCGATCCGATCCGCTCCGAATCCGTCCGAAGTGAGGATATGGTAAGGGTTTTTAGATATCCGGCCGGATGCGGATACGGATAGTTACATGCGGATGCGGATGCGGATATGGTATCGGTTATATCCGACAGATACGGATTATCCGCTATTTTAAGCG…	TTGATTATGCACACCATGCATGGATAGATCACTTTAAAGTTAAACCAGTGATCTGATTTCAGCAGCAAAGCACAACGCGCAGGGTTCAGGTTTGCCTTTGCAGTTTAATTTGCATATATCCTGTTGCATTGCAACAGTATGTGCTGTTCTTCAGGTGCAGACATGTACAGTAGTGCTAGTATGCTGTATGTAGCACAAGCATTCATTGTAGGGGTAAAAACGGAGCGGATATTATCCGATCCGATCTGCTCCGAATCCGTCCGAAGTGAGGATATGGTAAGGGTTTTTTTAGATGTCCGGCTGGATGCGGATGCGGATGCGGATAGTTACATGCGGATGCGGATGCGGATATGGTATCGGTTATATCCGGCGAATACGGATTATCCACTATTTTAAGCG…
84	Chr01	5430893	5046195	CAGGCCGCCGCCGTGCGACCTGGCGCGGCGGTTGGCCGGGCGGGTGG	C	46	GATATTCTGTCTCCCTGTGATACCAGCACTGTTTCCTGGGACTGGTATCGATTAACAGGTTAATTTGGAGCGTCACGGGCTAGTTCCGGTCGGGACTAGTTCGGGGCGTGACAACCCCGAACCGCGCGCTAGATATTATCCGCGCGCCGCCAAAATAATTGTTTATATCAATTATTTTTACTCCCGGTTGGTATAAACAACGGGACTAAAGATGATCTTTAGTCCCGTTGTTTATACCAACCGGGAGTAAAGAGTACCCCGAACGCGCCACCAACTCAGATATTATCGCGCACTCCTCTCGATCTCCTCCCCTCTCATTACTCCTCCATCCCTTCCTCTCCCCCTCCATCCCCTTCCTCTCTTCTTTCCCCTCCCGTTCCTCCCCTTCTCCTCTTTGAG…	GGTTCAATAAGTCGTGGGTTCAAGACAGACTCTAATTATTTTTACTCCCGGCTGGTATAAACAACCGGGACTAAAAATAGATCTTTAGTCCCGGTTGTTTATACCAACCGGGAGTAAAGAGTACCCCGAACCGCGTGCTAGATATTATCCGCGTGCCGCCAAAATAATTGTTTATATCAATTATTTTTACTCCCGGTTGGTATAAACAACCGGGACTATCTTTAGTCCCGGTTGTTTATACCAACCGGGAGTAAAGAGTACCCCGAACGCGCCACCAACTTAGATATTATCGCACACTCCTCTCGATCTCCTCCCCTCTCATTACTCCTCCATCCCTTCCTCTCCCCCTTCATCCCCTTCCTCTCCCCTTTCCCCTCCCGTTCCTCCCCTTCCCCTCTT…
85	Chr01	5471652	5086715	G	GCACCAGCTACCCTGGCACCGTGGTCCATGAGGGCGG	36	CGTACCCCAACATGGCGGCGCCAGCCACACTGGCGCCGTGCCCGTGCCACCATGGCACTAGGGCTGTCATGGAGGTGCTGACTGGGCAGAAAGGGGGCGCCAGCCACACTGGCGCCGCCCCTCATACCACGGCGCCAGCATAGCTGGCGCGCCCCTCCTCTGTGGGCCGACCCTTAAACCCCGTGGGCCCCACCACCTTTCTCCTCCCCACTCCCATTTTCGCCATTCCCAGCCCGAGCAGCGAGCTGCTGTTCTTCTCCCTCTCTCTCCCCCTTACCTCTCTACCTCAAATCCACTCAATTTGAAGCCGTTTTTAGCGGGATTTTTTGTGGAAATCGAAGAGAAAGGTAGACTCCTTCATTCCCCCTCCTTTTTTTCGTTTTTATTGGTTGAATTTGT…	GTACCCCAACATGGCGGCGCCAGCCACACTGGCGCCGTGCCCGTGCCACCGTGGCACTAGGGCTGTCGTGGAGGTGCTGACTGGGCAGAAAGGGGGCGCCAGCCACACTGGCGCCGCCCCTCATACCACAGCGCCAGCATAGCTGGCGCGCCCCTCCTCTGTGGGCCGACCCTTAAACCCCGTGGGCCCCACCACCTTTCTCCTCCCCACTCCCATTTTCGCCATTCCCAGCCCGAGCAGCGAGCTGCTGTTCTTCTCCCTCTCTCTCCCCCTCACCTCTCTACCTCAAATCCACTCAATTTGAAGCCGTTTTTCGCGGGATTTTTTGTGGAAATCGAAGAGAAAGGTAGACTCCTTCATTCCCCCCTCCTTTTTTTCGTTTTTATTGGTTGAATTTGT…
86	Chr01	5573082	5197960	GATGGGACAATTTCTTTTTTTTTTGAAAAGAA	G	31	CTAACTGCTTAATACATTAACAGTACATTTTCAGCATTTGGTGAGAAGGGGAAGTTTCTTGTTTCTGGTGGCAATGATTCATCAATTAAATTATGGGATTGGTCCAAAGGGTTCTCCTCTGAAACAAACAGCAGTGCTGAATTGGTGTTGGATATAAAGGTTAATAAAAAGGTAGCCACTCTACCTTAAATTCTGTGAAATGTTGTCTGCAGACTTTGGCTATCTATCTGCACATACTCCATTACTTGATGTACTAAATAGTAATTTTGCTGTTAACGGATGTGATTGAATTCTTAGGCTCGGGTAAAATTGCTAACCTTTGATCTACATCTTGACAGGTGAACTGGTTGTGTACTACTCCGACTGATTCAGATAACCTGATTTTGTGTGACACATCCA…	TATCTTACCCTTTTACTAACTGCTTAATACTTTAACAGTACATTTTCAGCATTTGGCGAGAAGGGGAAGTTTCTTGTTTCTGGTGGCAATGATTCATCAATTAAATTATGGGATTGGTCCAAAGGGTTCTCCTCTGAAACAAACAACAGTGCTGAATTGGTGTTGGATATAAAGGTTAATAAAAAGGTAGCCACTCAACCTTAAATTCTGTGAAATGTTGTCTGCAGACTTTGGCTATCTATCTGCACATAATACTCCATTACTTGATGTACTACTAGATAGTAATTTTGCTGTTAACGGATGTGACTGAATTCTTAGGATTGGGTAAAATTGCTAACCTTTGATCTACATCTTGACAGGTGAACTGGTTGTGTACTACTCCGACTGATTCAGATAACC…
87	Chr01	5686525	5297354	CGCAAGTCAGTGGATCCTATTATAATTTTTGTATGTGAATG	C	40	GAACTCCGCGGCGTGTTGAGGGACAACTCCGGCGCCCTCCCGATGACCTTGACCTTGGCCGGCGCCGGTAGCCGCATCCAGCACCCGAACTTCCCACCGCTGCCGCCGCCGCCACTATCGGCGGCGGCGGAGTGTTAACAACATCGCATCAACACGGAGGTGGACCTGTACCGCCACGGCAACCGCACCCGGCACCCGATCTTCCCACCGCTGCCGCCGCCGTCGCCTCACTGTAGGATACGAGACAGGAGCGACCGCGGCGACTGGCAGCTCTCGATGCCGCCGCTCCGCCCGGCCTTCGCGCCGGCCTTCTCCACCCACCGCCGCCCACGGCTTCATGCACTCCCTTGGCGCCCTCCACTCCGCTCCCTCGCCGTCCTCTGCTCCGCCATCCATGCC…	GCGTGTCAAGGGACAACTCCGGCGCCTTCCCGATGACCTTGACCTTGGCCAGCGCCGGTAGCCGCATCCAGCACCCGAGCTTCCCACTGCTGCCGCCGCCGCCACTACCGGCGGCGGCGGAGTGTTAACAACATCGCATCAACACAGAGGTGGAGCTATACCGCCACGGTAGCCGCACCCGGCACCCGATCATCCCACCGCTGCCGCCGCCGTCGCCTCACTGTAGGATACGCGACAGGAGCGACCGCGGCGACTGGCAGCTCTCGATGCCGCCGCTCCGCCCGGCCTTCGCGCCGGCCTTCTCCACCCACCACCGCCCACGGCTTCACGGCTTCGCGCACTCCCTTGGCGCCCTCCACTCCGCTCCCTCGCCGCCCTCTGCTCTGCCATCCGTGCCCT…
88	Chr01	5691707	5302500	TTTTGAAGTAATCAATTTTTTACCAATAAATCTAAAGGTATTCAGCTACTCTCTC	T	54	CGGCAGTTTTTTTCTCTCTTGTACCGTTGCACGTGCAATGGTGCAAATTAGCACGGAGTACATGATGATCAACACATTGAGAAAATCCATCACAACGTATAGTGACTTCTATCACTACACCATATAGTAACATCTATTAATACATAAAAATTAAGTTCAACCTCAATCTACATATTCAGAAAAAAAATACAAATTCAGATATGAAACATACAGTGGATTTGTCTCTTTTTTTTATTTATTAGTGTGTGAGCTGAGTTTATACTTAAAATTTTATGGCGTGACATAATTATGTTGTATAAACTAGATGAAACCCCGCACTAGGGCGGTAAAAATAGCTCGAGGCTCGCAAGCTACTCAAATTCGGCTCGTTCTAGACTCAGTTTGAACCTAAAACAAATC…	CGGCAGTTTTTTTCTCTCTTGTACCGTTGCACGTGCAATGGTGCAAATTAGCACGGAGTACATGATGATCAACACATTGAGAAAATCCATCACAACGTATAGTGACTTCTATCACTACACCATATAGTAACATCTATTAATACATAAAAATTAAGTTCAACCTCAATCTACATATTCAGAAAAAAAATACAAATTCAGATATGAAACATACAGTGGATTTGTCTCTTTTTTTTATTTATTAGTGTGTGAGCTGAGTTTATACTTAAAATTTTATGGCGTGACATAATTATGTTGTATAAACTAGATGAAACCCCGCACTAGGGCTGTAAAAATAGCTCGAGGCTCACAAGCTACTCAAATTCGGCTCGTTCTAGACTCAGTTTGAACCTAAAACAAATC…
89	Chr01	5776969	5392820	TATATATATATATATATATATATATATATAC	T	30	TGCTGATGCTTGTTCCCATGATCCTGTCCTTGTTGTAGATAGAACGACACGCGGGGCATCTCCCGCCACATTCTTCCTTCTGATCCATTTCCATTATCTGATGCCAACACCAAAGACAAATCTGCCAGAAAATTATAAACACACATATTTTGTTAATACATAAGATTCACAACAGAAGAAATTAACCAAGCCACAAATGTGCATATTTTATAGAATCTGCAGCATGCAAATACACCAAATACATAAGGCAATATACAAAATTAACAGACCATGCATTTAATTTACCAAAATATGGACAATAACTATCTGAAATTTATTGCATTTGATAGTTGCATTACCCAAATGCCTGTGCATTTGCTAAAAATTAAATTCAATCCTACATGTCAAATAAATGTCAGT…	TGCTGATGCTTGTTCCCATGATCCTGTCCTTGTTGTAGATAGAACGACACGCGGGGCATCTCCCGCCACATTCTTCCTTCTGATCCATTTCCATTATCTGATGCCAACACCAAAGACAAATCTGCCAGAAAATTATAAACACACATATTTTGTTAATACATAAGATTCACAACAGAAGAAATTAACCAAGCCACAAATGTGCATATTTTATAGAATCTGCAGCATGCAAATACACCAAATACATAAGGCAATATACAAAATTAACAGACCATGCATTTAATTTACCAAAATATGGACAATAACTATCTGAAATTTATTGCATTTGATAGTTGCATTACCCAAATGCCTGTGCATTTGCTAAAAATTAAATTCAATCCTACATGTCAAATAAATGTCAGT…
90	Chr01	5805344	5420842	T	TTCTACCTGACTAAGGGCATGTCTGAGAAACAGAGAATCTGATGTT	45	TTTTTTTTGGAATAGAGGGAGTAGGTATCTACCACATAAAAGTTACTCACTCCGTCCAAAAATATAGGCTTTTTAGTTGTATTCATAGCCAAAAATACCTATATTTTGGGACGGAGGTAGTACAATATTATATGGATTATTAGTTTATTATTGTGTTGTGATGTGAGTCTTTTAAGGCACACTAGTATCTGTAGGACCTGGCACACAAAACGAAGCATGTACTACTGTATAATTAATTAAGTATTAACTAATCTTTTTTTAAAATTGATTAATATGATTTTTTTAAAACAACTTTCGCGTAGATTTTTTTTTTCAAAAAACACACCGTTTAACGATTTGGAAAACGAGGAAAATCGGTTACCGCACACAGCCTAGAGATCTTTTCACTGTTCTACCTAT…	AGAGGGAGTAGGTATCTACCGCATAAAAGTTACTCACTCCGTCCAAAAATATAGGCTTTTTAGTTGTATTCATAGCCAAAAATACCTATATTTTGGGACGGAGGTAGTACAATATTATATGGATTATTAGTTTATTATTGTGTTGTGATGTGAGTCTTTAAGGCACAGTAGTATCTATAGGACCCGGCACACAAAATGAAGCATGTACTACTGTATGATTAATTAAGTATTAAATAATCTTTTTTAAAAATTAATTAATATGATTTTTTTAAAACAACTTTCGCGTAGATTTTTTTTCAAAAAACACACCGTTTAACGATTTGGAAAACGAGGAAAATCGGTTGGGAAAAAAAAGTGCCGAACACAGCCTAGAGATCTTTTCACTGTTCTACCTATCTC…
91	Chr01	5819322	5433794	GCTGTCGCCGAAGCAGGCCGCTCGGCATGCATCTCTCCACTGCCTTG	G	46	TATGAAATTAAATTTTTCATTCGTGTCCGAAAACCCCTTCCGACATCCGGTCAAACGTCCAATATGACACCCAAATTTTTTTTTTCACGAACTATACAAGGCATGCGTTTCTGTCATGGCCCTAAAATCCAAAGTCTGAAGCCCCTTGATTTGTATAAAAAAAATACAAAAAATTTGAAAAATTTCAATCCTGTGGAAGAAATTGTTTAGTAAGTCTTTGAAACAAGGGGATTGAATCCAATCAATTTCTTTAAAAAAAAAACTACGAAATAGGCAATCCTACATATATTTTATAAGTCATCAGCACAATCTAAAAGTCCATCCCTAAAATTCTACTTTTGGATGAGTAGTTAGATTTTAAGGTGTCAAAAATTTCCTCCATCTAAGGACCAAGTAAAC…	AAGCTCTCTGACTCTCCAGCTCTTTGTAGCTTCTTCATACACAGATCCACCAGAACACAGGAGTAGGGTATTACGCTTCTCAGCGGCCCGAACCTGTATACATCGCCCGTGTCTTGTGCATCTTCCATTCTCGCGAACCTTCCACAGACTAGGAGCTTAGAATCTCACCCAGGGTCCCCGGCCGAACCGGCAAAGGGGGGCCTGCGCGGTCTCCCGGTGAGGAGCCCCACGCTCCGTCACAATCAATTTCTTTAAAAAAAAACTACGAAATAGGCAATCCTACATATATTTTATAAGTCATCAGCACAATCTAAAAGTCCATCCCTAAAATTCTACTTTTGGATAAGTAGTTAGATTTTCAGGTGTCAAAAATTTCCTCCATCTAAGGACTAAGTAAAC…
92	Chr01	5833973	5448521	GCCACCGCCGCCGCCGCCGCCGCGCCCATCCC	G	31	CGCACTTGCGCTTCCTCGAGCTAATCCGCTAGTACCACTGAAAATTTCGAGAGGACCGATAGATCCGAAATTTCGAAAAACTACGTAAATTTCGGGAAACATTGAACACAAGGACGGGACAAAAAAAGCGGCTCACAGCTGACATTGCGTCACCTCGGAGTGGTATTTGAAGCTTTGAGCTGATACGGCGGGCTGAGGCCGAGCGCGGTCTAAGTGAGAGGGTAGGGCCGATAGGGCCGATAGGTTGAGGCGTGCATGATATATCGGAGAATTCGATTCCGTCTGCCGAGTGGCTTAAGGTTTGTTCGGGATTGAAAATAATTAATTACAAACCTCAATAGATGTGAAAATATTTTCCTTCAAATCCCCCGTCAATTCTCTTGTGAGAGTGACGAACAA…	TAGTACCACTGAAAATTTCGAGAGGACCGATAGATCCGAGATTTCGAAAAACTACGTAAATTTCGGGAAACATTGAACACAAGGACGGGACAAAAAAAGCGGCTCACAGCTGACATTGCGTCACCTCGGAGTGGTATTTGAAGCTTTGAGCTGATACGGCGGGCTGAGGCCGAGCGCGGTCTAAGTGAGAGGGTAGGGCCGATAGGGCCGATAGGTTGAGGCGTGCATGATATATCGGAGAATTCGATTCCGTCTGCCGAGTGGCTTAAGGTTTGTTCGGGATTGAAAATAATTAATTACAAACCTCAATAGATGTGAAAATATTTTCCTTCAAATCCCCCGTCAATTCTCTTGTGAGAGTGACGAACAAAGGTTTAAAGAGGCTACTTTATAAAACGG…
93	Chr01	5842723	5457682	CTATATATGTCTGCACTTATTTTGGGACAAAGGTATA	C	36	CATTTTATAAGTCGTTTGACTTTTTTTAATAGTCAAGTTTAATTAAGTTTATAGAAAAATATATTAGTATTTTCAACGCAAAACAAATATATTATCAATGATAATATATTTAATGTTAGATGTTGCTAAATTGTTTTATAAACCTAATCAAACTTATAATATGAAACGGGTAATATGGAATTTCATCCGCAACATTTACTGGGTAAAATAGCACGTGCAGACGTGCAGTATCATACACTTCAATGTGGTTGGGGCTTGCTTCATTTACTGGGATTCGATTTTCCGTACAAATTAAGTACTCCACTGTTCATGTCCAACGACAGCACTGTTTATGTGCAACGTTTGACCGTTCGTCTTATTTGAAAAAAGATTATGATTATTATTTTTTATTGTTATTAG…	ATAGTCAAGTTTAATTAAGTTTATAGAAAAATATATTAGTATTTTCAACGCAAAACAAATATATTATCAATGATAATATATTTAATGTTAGATGTTGCTAAATTGTTTTATAAACCTAATCAAACTTATAATATGAAACGGGTAATATGGAATTTCATCCGCAACATTTACTGGGTAAAATAGCACGTGCAGACGTGCAGTATCATACACTTCAATGTGGTTGGGGCTTGCTTCATTTACTGGGATTCGATTTTCCGTACAAATTAAGTACTCCTTCCGTCCCAAAATAAGTGCAGTTTTAGCACTGTTCATGTCCAACGACAGCACTGTTTATGTCCAACGTTTGACCGTTCGTCTTATTCGAAAAAAGATTATGATTATTATTTTTATTGTTATTAG…
94	Chr01	5893210	5493404	ATAGCTCTTGCGCAAGTCTATTTGACATAATATATT	A	35	GTTCTATTCCTTGGTTGGCTCTATAGCATTGTGGCCAAGTATGGCAGTCGCTCTTCCTTCTCGATCAACCTTTGTAGAATCTAAGCTCACCGTTGGTTAGCTACGCTTCTGCAACTCCCTTGGGACCCTCGCATCAAGTCTAGGTGCAACCGCCATTTTCTCAGAGATTACCTGAAACCAAGTCCATCAGTGATCATGTCATCCGTAGTGGCCGGCCTTCCCGATTCCCCCTCATCATTCATGTTCTCGTGGCACGGCCGATGCCCCTTTGCTCTCTTCACACATCTGGAGTGGCAGAGTGAATTAGTGATAGAATCAACCGGGAATTTGGTTTTCGAGGTAAAATATATCTTTGCAATGCCCATACAATTACTAGTGGATAAATTAGTTCAAAGTTTT…	GGTTCTATTCCTTGGTTGGCTCTATAGCATTGTGGCCAAGTATGGCAGTCGCTCTTCCTTCTCGATCAACCTTTGTAGAGAATCTAAGCTCACTGTTGGTTAGCTACGCTTCTGCAACTCCCCTGGGATCCTCGCATCAAGTCTAGGCGCAACCGCCATTTTCTCGGAGATTACCTGAAACCAAGTCCATCAGTGATCATGTCATCCGTAGTGGCCGGCCTTCCCGATTCCCCCTCATCATTCATGTTCTCGTGGCACGGCCGATGCCCCTTTGCTCTCTTCACACATCTCGAGTGGCAGAGTGAATTAGTGATAGAATCAACCGGGAATTTGGTTTTCGAGGTAAAATATATCTTTGCAATGCCCATACAATTACTAGTGGATAAATTAGTTCAAAGT…
95	Chr01	5924357	5511884	A	AATACTCTCTTCGTCCCAAAATAAATCAACTT	31	GGGGAAATTGTCACTTCGGGACGGGAATCCGCGCAGGTAGAAGTAGGTGGCGACAACGACGGGGAAGTGGCACACGCTCGTGAGTAGCGACCCGCACTACTCCGCTGCGACGCCGGCGAGCAGTTCATTTCAACCTGTACTACACGAATCTGTTTGATGGTCACAATTCACAAACTACTTGCTTGATTGTTGATACTACTCCGTAGTACTATAACTACTGGATCGTCCTGTAACTAATCATGTTCCATGATTTGCAAGTGCGAATGTGTACTGTGTATAACACATGGTGGCCATTGTCTTTTTGGCCGTTGTGTTTTTAATTGTTTCACCTGATCCTCGTGACAAAAATACTCACAGCAAGCAAGCAATCAATCATCAATACACGACTAGAATGGTATG…	GCCTTGCTTGATTGTTGATACTACTCCGTAGTACTATACTAGGGCTGTGTTTAGATCCAAAGTTTAGATCCAAACTTCAGTCATTTTTCATCACATCAACATGTCATACACATACAACTTTTCAATCATATCATCTCTATTTTCAACCAAAATCCAAACTTTGCGCCGAACTAAAGACAGCCTAGAACAAAAGCAGAAACTACTGGATCGTCCTGTAACTAATCATGTTCCATGATTTGCAAGTGCGAATGTGTACTGTGTACTAACACATGGTGGCCATTGTCTTTTTGCCCGTTGTGTTTTTAATTGTTTCACCTGATCCTCGTGACAAAAATACTCACAGCAAGCAATCAATCAATCAATCATCAATACAGGACTTGTATGGCATGGGTACGTTAC…
96	Chr01	5937829	5520011	T	TATTTTACATCCCTCATTCTTGATCTTGATTGAACCATCTCTCTCACAACCACAA	54	CCAGATCAGCCGATCCCACGTTCTGGTTCTTGTCTTTGCCTTCCACGCAAACAGGGAGTACAATTGTACAGTATTCAGAATTTCAGGTTTGTCTTGGCACATGCACGTACGGCCCGTGCAAGAGTCCTATTGTACTCTAGTACTGTTAGTACGTACGCTAGTACGCGCCGATCTTTCTGCGTTTTCTGCATTGTGGTCTGATGCTTGATGTGTTGGATCTTGGATGTCAGTTCGTTCAGATGGTCAGTGCAAGATAGAAATCGTTTTCCTTTTCTTCATCAGATAGTGTGCACTGTGCAGTGTGCTACAATGCCACTAATCGATGGGCTTTGATCTCTTAAAACAAGTCTATTGGCTTGCAAAGGTCTATATCATACATCTGTCAGACTTCAAAGCCAT…	AGTATTTTCATTGTTGTTAGATGATAAAACACGATGAATACTTTATGCGTGACTTATCTTTTTAATTTTTTTCATATTTTTTTCAAATATCGGACGGTCAAACATTGGACACGAAAACTAGGGTTTATCTTTTTTTTTTTGGGGACAGAGGGAGTACACTAGTACGCACCGATCTTTCTGCGTTTTCTGCATTGTGTCTGATGCTTGATGTGTTGGATCTTGGATGTCAGTTCGTTCAGATGGTCAGTGCAAGATAGAAATCGTTTTCCTTTTCTTCATCAGATAGTGTGCACTGTGCAGTGTGCTACAATGCCACTAATCGATGGGCTTTGATCTCTTAAAACAAGTCTATTGGCTTGCAAAGGTCTATATCATACACCTGTCAGACTTCAAAGCCAT…
97	Chr01	5951916	5534202	T	TACATGAGTATGTCAAATGGTACATATTTTTTAAAATATTTA	41	ATATAATAATCTACACTGAGTCCTGTGACCCAAGAAGTATATACGTGGGAACACCACTGGACGTATCTGCCCACTCTCATAACACTGTACATGTACAAATACTGGTGTGTCCTCTTAAATACATGCTTAAAAAAATGTGTACGGACAATAATAAACCCTTGACTTCTCTAAAATCTTATTGAAGATACAGCACTTTATGTGCATAATTAATTATGGGCATTATATTTATTTTGTGCTTTCATATCTCGGTGAAATTTCACCCTTACACTATCATTAAAAAATGAGTAAATTTCATAAAACCCCATTTATTATAATCCAAGCTGCACAAAACTATTGGGATTTCGGCATGTGGCGCATTACCATATGTATTATGGTCCTAAAGTTTCACGAGACCATACT…	AATATAATAATCTACACTGAGTCCTGTGACCCAAGAAGTATATACGTGGGAACACCACTGGACGTATCTGCCCACTCTCATAACACTGTACATGTACAAATACTGGTGTGTCCTCTTAAATACACGCTTAAAAAATGTGTACGGACAATAATAAACCCTTGACTTCTCTAAAATCTTATTGAAGATACAGCACTTTATGTGCATAATTAATTATGGGCATTATATTTATTTTGTGCTTTCATATCTCGGTGAAATTTCACCCTTACACTATCATTAAAAAATGAGTAAATTTCATAAAACCCCATTTATTATAATCCAAGCTGCACAAAACTATTGGGATTTTGGCATGTGGCGCATTACCATATGTATTATGGTCCTAAAGTTTCACGAGACCATACT…
98	Chr01	5995567	5577812	TATATATATATATATATATATATATATATATATATATATATATATATATATATATA	T	55	CAGAAAGGGTTTTTGCGTGCGGGCCAAAAGGCATCTTCCTATGCAAAAGGCCGGCCCACACACCCAAGAAAGTTTGTGATAATCATATTTTCGCATGTGGTCGGCCCAACCGCACGTGAAGATACATTATCCCGTGCAGTCGACTTAACGCGACCGAACGGAAAGATGCATCATCCCGTGCGGTCGCTTAAGTGGACCGCACGCGATGTGGACGCATTATCACGTGCGGTTCGTTAAGAGGACCACACCCGATAATGCATCTTCGCGTGTTGTCCATCATCAGGCCCCGAGGGGAGCGGTTTTTCCAGGCGTGGCACTTATGGCCTGCCTGGAACTTTCCGGGAGCCTCATACAGGAAAACCCTTTCTGTAGTAGTGTGAGGAGAAGAGAGAAGATAAG…	CAGAAAGGGTTTTTGCGTGCGGGCCAAAAGGCATCTTCCTATGCAAAAGGCCGGCCCACACACCCAAGAAAGTTTGTGATAATCATATTTTCGCATGTGGTCGGCCCAACCGCACGTGAAGATACATTATCCCGTGCAGTCGACTTAACGCGACCGAACGGGAAGATGCATCATCCCGTGCGGTCGCTTAAGTGGACCGCACGCAATGTGGACGCATTATCACGTGCGGTTCGTTAAGAGGACCACACGCGATAATGCATCTTCGCGTGTTGTCCATCATCAGGCCCCGAGGGGAGCGGTTTTTCCAGGCGTGGCACTTATGGCCTGCCTGGAACTTTCCGGGAGCCTCATACAGGAAAACCCTTTCTGTAGTAGTGTGAGGAGAAGAGAGAAGATAAG…
99	Chr01	6006252	5588710	TATATATATATATATATATATATATATATATATATATATATATATATATA	T	49	TGACGGCATATAACAAGTGGTTAATAATGGCAGCATGGTTCTATACATAAGATAAAAGAAAGAAAACAAAATATATACAAAGAGGGATCATGGACAGAGATATGTCTTACGGTAACGGGAAGATATTATAAATATCTCAATTCTAAACATCATGAAATATGCACGATCATGGTGCACACGACTCTCTTAAGAAACCATTCGTGAAAATACATTTTTTGATTTTTTGTAAGTGCAAACCCCCCCCCCCCACCCCTTCCCCCTTCCTCCACCGCGTCCCAAAACCTAAAAAAGTAATTTGTACTCCCCTAAAGTACAATAATTTTTTCACCTACATTTTTTTCTCAACCAATAATAACATTTCACCGTTCAAATTCTCCACTTATTTCCTCATCTCAAAAT…	CATTCGTGAAAATACTTTGTCTGATTCCCTGCAAGTGCAACTTCATCCCCTTGCGCTGTGGACACTTCCTAGCCAGATGACCAACTTGGCCACACACAAAGCAAGTCCTCTCATCCTGATTAGGATTGTTGTTGTTCTTCTTCTGCTTCTTGAAGTTGGTGGTCTGCTGAGCTTTGTATTTCCCCTTGCTCTTGTTCTGGGCCTTGTGCACAACATTAGCACTAGACTGCCCACCATCGCCCTTAGACGCGGCATCTTCCTCCACAGCTGTCTCCTCAAAACCCAAAAAAGTAATTTGTACTCCCCTAAAGTACAATAATTTTTTCACCTACATTTTTTTCTCAACCAATAATAACATTTCACCGTTCAAATTCTCCACTTATTTCCTCATCTCAAAAT…
100	Chr01	6116020	5706754	TAAATTTTTCTCTAAATTATTTATCCGATCTATAATCCGATTACACCATCGTGTTC	T	55	AGGCCATAGATCGCTGATGGGCTTTGTTGAACGAACAAAAGTTTACAGGCCTACGAAACACCGTCTGTGGGCCAAGGTTAGATGACTAACTGGGGGCATTCGGCCCAAGTAAGCCTGCCAGTGGGTTGGTTACGAATGGATAGAATGGACTGTTCGGATATCAATTTGGATTGGAATGAATTCATCTGAAGTCCCTTAACTTGTTAACGAATCCGATTTTTGTTCTTCAACCGAAAAACCAGATATAACATATCTCTCAACTGTTAAAACAAATACAATATAAGTCCTATAATGGTTTTAGATGATGTGGCGCCTATATGGCTAATTTGACTCGGTCTTCATCTGACGTGGTATTGACATGGCATATGAAGCAAAATGGCCGTGTCTAGATAGCATGCA…	AGGCCATAGATCGCTGATGGGCTCTGTTGAACGAACAAAAGTTTACAGGCCTACGAAACACCGTCTGTGGGCCAAGGTTAGATGACTAACTGGGGGCATTCGGCCCAAGTAAGCCTGCCAGTGGGTTGGTTACGAATGGATAGAATGGACTGTTCGGATATCAATTTGGATTGGAATAAATTCATCTGAAGTCCCTTGACTTGTTAACGAATCCGATTTTCGTTCTTCAACCGAAAAACCAGATATAACATACCTCTCAACTGTTAAAACAGATACAATATAAGTCCTATAATGGTTTTAGATGATATGGCGCCTATGTGGCTAATTTGACTCGGTCTTCATCTGACGTGGTATTGACATGGCATATGAAGCAAAATGGCCGTGACTAGATAGCATGCA…
101	Chr01	6146042	5738116	A	AATCTATCTATCTATTATCTATCTATCTATCTATCT	35	CAGAGTCGGCTGGTTAGACCGCGGGCTGGCCGGTCTGACCGCTCAGTATACGCCGGTCTGACCGGACCACATATCCAGCAGCACCTATATATCACCTGTTAAAATCCAATCATCTCCAAAACCACTTCGCCAATAATATCCAAATATTAAAACCAATAATCACATATGCCAAACAGAATAAAGAATAAAAACACTTTGATTTTACACTTAGAATCCCTCCTCTCCAGCTTGCAAAACAGAGCATGTGTTATGGTATAATTAATTAAAAATTACTTTAAAGAATAAATATAATATGATTTTAAAGCAATTTTTTATATATATTTTTTTAAAAGTACCATTTAATAGATTAGGAAGCGAGCACATGAAATGTGAGGGAATAGAAGTTGGGAAGATGAGGTA…	GGCTGGTTAGACCGCGGGCTGGCCGGTCTGACCGCTCGGTATACGCCGGTCTGACCGGACCACATATCCAGTAGCACCTATATATCACCTGTTAAAATCCAATCATCTCCAAAACCACTTCGCCAATAATATCCAAATATTAAAACCAATAATCACATATGCCAAACAGAATAAAGAATAAAAACACTTTGATTTTACACTTAGAATCCCTCCTCTCCAGCTTGCAAAACAGAGCATGTGTTATGGTATAATTAATTAAAAATTACTTTAAAAACTTTAAAGAATAAATATAATATGATTTTAAAGCAATTTTTTTTATATTTTTTTAAAAGTACCATTTAATAGTTTAGGAAGCGAGCACATGAAATGTGAGGGAATAGAAGTTGGGAAGATGAGGTA…
102	Chr01	6155152	5747254	TAGTTTTTACTATAGGTACAAATTGTAAAATGATATGCACA	T	40	CTAATTACTGTTCCAATATTCGATGTGACAGGGACTGAAAATAAGTCCCTAGATCCAAACAGGGTCTCAGTTGTTACACCACCCTATTATACTTCCCTTATTTTTCATTGGTGCATATGCTTTATAGCCCGCACACATTTTTATTTACCTTTTTAAGGTATTAGGTTATTTTTGTTTTAACTTCGTACAAAATCATTAAGGCCTTGTTCGGTTAATCCGAGGGGATTTATTCCACAACTATTATGGTGTAGAATTATTCAGCCTCAATCCTCTTCAATCCTCTCTAAACCGAATAATGCCTAAATTAGGCGACCATGAGTCTATGGCTGCCTCATTGGAAGGAACATACATATCCTTCAAGTATTGTTTTTCTCAAACAGGTCAATAGTTAATTGCTAG…	TCTAATTAGTGTTCCAATATTCGATGTGACAGGGACTGAAAATAAGTCCTAGATCCAAACAGGGTCTCAGTTGTTACACCACCCTATTATACTTCCCTTATTTTTCATTGGTGCATATGCTTTATAGCCCGCACATATATTTTTTTACCTTTTTAAGGTATTAGGTTATTTTTGTTTTAACTTCGTACAAAATCATTAAGGCCTTGTTCGGTTAATCCGAGGAGATTTATTCCACACCTATTGTGGTGTGGAATTATTCAGCCTCAATCCTCTTCAATCCTCTCTAAACCGAATAATGCCTAAATTAGGCGACCATCAGTCTATGGCTGCCTCATTGGAAGGAACATACATATCCTTCAAGTATTGTTTTTCTCAAACAGGTCAATAGTTAATTGCTAG…
103	Chr01	6155823	5747884	G	GTACCATTCACTCTTTCAGGGACAGAGCGATGCGG	34	CCCAGTGAATTTAACGGCTAATATTATCGGGATGAGGTGCCTCATCCTCATTTTATTTTGGGTTCACTTTTCATTAGTCTAAGATGCGTCAGTCAGGTTAGGTTAAGGGCTCGTTCATTTCAAAATAAATGCAAAAAAAAGTACATAAATATGCCATTCATTTTAAAGGAAATCCACCAAAGGAAAATTCCCTATCCCTCAACACAGGGAAAAAAAATAATCCACTCCAACACAATATTTTCAACCCTTTGGATTGTTCGCTGAACAACCATAAGAAAGTTTCGTATGTTTTTCTACCTTAGTTTTGCATATGTATTCTGGTACTATTTGTACGCTTTTTCTATTATTATGTTTTGAAAATCCTACAACTGAACAAGCTCCTAATTATCTCTTTCACGT…	CCCAGTGAATCTAACGGCTAATATTATCGGGGTGAGGTGCCTCATCCTCATTTTATTTTGGGTTCACTTTCCATTAGTCTAAGATGCGTCAGTCAGGTTAGGTTAAGGGCTCGTTCATTTCAAAATAAATGCAAAAAAAAGTACATAAATATGCCATTCATTTTAAAGGAAATCCACCAAAGGAAAATTCCCTATCCCTCAACACAGGGAAAAAAAATAATCCACTCCAACACAATATTTTCAACCCTTTGGATTGTTTGCTGAACAACCATAAGAAAGTTTCCTATGTTTTTCTACCTTAGTTTTGCATATGTATTCTGGTACTATTTGTACGCTTTTTCTATTATTATGTTTTGAAAATCCTACAACTGAACAAGCTCCTAATTATCTCTTTCACGT…
104	Chr01	6177835	5767922	G	GTATATATATATATATATATATATATATATATATATA	36	TTATACATTCCCGATTAATAATTAATACAAATCTGTTTCAGTCACAGAGAAACGCACATCAGTGTGATCATTTCAACAACTTTTGCATGCGCAGCTGAGGGCCTTGGAGTCCCCTTGCTCCCCCCGTACCATGGCGAGTCGCAGGACTTCAGCCATGGCGCCAACTTCGCCGTCGTCGGCGCCACGGCGCTCGATCTCGCCTTCTTCCAGAAGAACAACATCACCAGCGTGCCCCCGTTCAACACCTCACTGAGCGTGCAGGTCGAGTGGTTCCAAAAGCTCAAGCCTACCTTGTGCTCGACAACCCAAGGTACGTAGATAGTATAATGTATGCACACGTATTTGTGATATCGGTTGATGATCAGTTTTGCAGAAGATAGTACGGTGGTTAGGGGTGTG…	TATACATTCCCGATTAATAATTAATACAAATCTGTTTCAGTCACAGAGAAACGCACATCAGTGTGATCATTTCAACAACTTTTGCATGCGCAGCTGAGGGCCTTGGAGTCCCCTTGCTCCCCCCGTACCATGGCGAGTCGCAGGACTTCAGCCATGGCGCCAACTTCGCCGTCGTCGGCGCCACGGCGCTCGATCTCGCCTTCTTCCAGAAGAACAACATCACCAGCGTGCCCCCGTTCAACACCTCACTGAGCGTGCAGGTCGAGTGGTTCCAAAAGCTCAAGCCTACCTTGTGCTCGACAACCCAAGGTACGTAGATAGTATAATGTATGCACACGTATTTGTGATATCGGTTGATGATCAGTTTTGCAGAAGATAGTACGGTGGTTAGGGGTGTGT…
105	Chr01	6204504	5790449	TACATATATATATATATATACATATATATATATAT	T	34	CACAAGTTGCGACTAATTACGAGACGAATATTTTAAGCCTAATTGCTCCATGATTTGATAATATGGTGCTACGGTAAACATTTGCTAATAATGGATTAATTAGGCTTAATAAATTCGTCTCACGGTTTACTGACGGATTCTGTAATTAGTTTTTTTTATTAGTGCTCGAACATCTCATGCGACACCCTATATAATACTCGATGTGATACGCCAAAACTTTACACCCCTGAATCTAAATACCCCCTTATTTTTCTTGTATAACGCTCAAGTATCGATTCATGTATAACTTGCTGGTTGTATTCTTTTGTGGCTGGCACATAAAAGGACAGACATGGGAAACGCATGTTTGATTTTTGTCGTTGCCTGCAGAAAATTGAGGCTTATATAGGATGCCAAAAA…	ACACAAGTTGCGACTAATTACGAGACGAATATTTTAAGCCTAATTGCTCTATGATTTGATAATGTGGTGCTACGGTAAACATTTGCTAATAATGGATTAATTAGGCTTAATAAATTCGTCTCACGGTTTATTGACGGATTCTGTAATTAGTTTTTTTATTAGTGCTCGAACATCTCATGCGACACCCTATATAATACTCGATGTGATACGCCAAAACTTTACACCCCTGAATCTAAATACCCCCTTATTTTTCTTGTATAACGCTCAAGTATCGATTCATGTATAACTTGCTGGTTGTATTCTTTTGTGGCTGGCACATAAAAGGACAGACATGGGAAACGCATGTTTGATTTTTGTCGTTGCCTGCAGAAAATTGAGGCTTATATAGGATGCCAAAAA…
106	Chr01	6261174	5837051	CTCATCCACTAGTAATCATGCACGTGCAATGCACGTTCTTCCCATCATAACATGT	C	54	ACTAAGGAGCGAGCCCGCTACGAGTCGGAGAGCAGTTTGCGGGTTTATGTAAAACCCCGGTTACTTGGGAATCGATCGACTGGTCTGCCACGGCTGAAACGAACTCAAATAAAAATCGCTGAGCACAATTCCAATAGACGTACTACGTGGTACGTGTGAGTTATTATGTAAGTTTCGCATGAGTTTTAGATGTATTTCATATGGAGTGTCTTTTTCGTGCTATTCTGATCCGTGTGGTTTTCACATCATCTGATCGGAGTTCTTTTTTTTTTGTTGTTGTTTTTTCGCGCTATACGTGGGGTGCACTCATGGCGTAAAGGAAATTACTCTAGGAGTGGGCGGTCCAGCAAAATTCATGGATTTGATAACTTGATCCAATTAATACAGAGAATTTACCAT…	GGAGCGAGCCCGCTACGAGTCGGAGAGCAGTTTGCGGGTTTATGTAAAACCCCGGTTACTTGGGAATCGATCGACTGGTCTGCCACGGCTGAAACGAACTCAAATAAAAATCGCTGAGCACAATTCCAATAGACGTACTACGTGGTACGTGTGAGTTATTATGTAAGTTTCGCATGAGTTTTAGATGTATTTCATATATGGAGTGTCTTTTTCGTGCTATTCTGATCCGTGTGGTTTTCACATCATCTGATCGGAGTTCTTTTTTTTTTTTGTTGTTGTTTTTTCGCCGCTATACGTGGGGTGCACTCATGGCGTAAAGGAAATTACTCTAGGAGTGGGCGGTCCAGCAAAATTCATGGATTTGATAACTTGATCCAATTAATACAGAGAATTTACTAT…
107	Chr01	6315506	5989661	GTATTTTAAGTTCGATATGAAAATTACTTTGATGTTCCGAAGGGCT	G	45	GCTGACCAATAAGTTGCCGTAGGCAATTCAATCATTTCTGGCCATATACATCTGCTGAAAGTTATGAACTCCAGCCACTGACGAATTCGTGGTGCTGGTATTCTTCGGCAACATGATCCATCATACAGATTCTATGCTTGGTTGTTGCAAGCAATTCTTATGCGGTGACAGTTGCTGCTGATAGGGAGAAAAGGCATGTCCGGCGGCTCAGCGGCTCTAACTGTACTTTCATATGAGTGGAACCGATAGTTGTACATGTGAAAAGTTTGCCATTCAAAATGGTCATTCATGTTGTTAGGTCATTCATGTAGTCGATGTCAAATTAATCATCAATTATTTGATTTGATTCATTCACAAGTTTAATTGGCTCTAGATACTTGTGAGCTGCAGGCCAGCAAT…	GCTGACCAATAAGTTGCCGTAGGCAATTCAATCATTTCTGGCCATATACATCTGCTGAAAGTTATGAACTCCAGCCACTGACGAATTCGTGGTGCTGGTATTCTTCGGCAACATGATCCATCATACAGATTCTATGCTTGGTTGTTGCAAGCAATTCTTATGCGGTGACAGTTGCTGCTGATAGGGAGAAAAGGCATGTCCGGCGGCTCAGCGGCTCTAACTGTACTTTCATATGAGTGGAACCGATAGTTGTACATGTGAAAAGTTTGCCATTCAAAATGGTCATTCATGTTGTTAGGTCATTCATGTAGTCGATGTCAAATTAATCATCAATTATTTGATTTGATTCATTCACAAGTTTAATTGGCTCTAGATACTTGTGAGCTGCAGGCCAGCAAT…
108	Chr01	6325048	5999154	G	GGAGCAACAATGATGCTCTGCATTACCACAG	30	TCTGTGAACCTGATATGAGAGTGAATGAGTTGTTTGCCTAGTATACTTCGTTTCAGTAGGAGATGTAAATTCTCAGTCCGTGCTGATTCAGACTAGTGAATTAAAATTAGTAGTACTAGTTAGTACTGTCTCCGTGCATTCAAAAAAAAAAAAAAGGAAGCTAATGCAGTACTGCTCCTGAACTCAGAATTCAAGGAGTGCAGAAGTTGAATTAAATCTGAATCTTTCAAACCACTGATCACATCTATCGCAGCTATAGCCTCGCATTGCATCTGAATTAATTCTTCGCGTCATGGCGCAACAGTAAATCCCAATATTAGCGCCACTATTCAATTGGATGTTCAGGGAATAATCAATGATGCGTACTGTGCCCCCGTCATAAGTTGAGGACAGCAAGCG…	ATATCTGTGAACCTGATATGAGAGTGAATGAGTTGTTTGCCTAGTATACTTCGTTTCAGTAGGAGATGTAAATTCTCAGTCCGTGCTGATTCAGACTAGTGAATTAAAATTAGTAGTACTAGTTAGTACTGTCTCCGTGCATTCAAAAAAAAAAAGGAAGCTAATGCAGTACTGCTCCTGAACTCAGAATTCAAGGAGTGCAGAAGTTGAATTAAATCTGAATCTTTCAAACCACTGATCACATCTATCGCAGCTATAGCCTCGCATTGCATCTGAATTAATTCTTCGCGTCATGGCGCAACAGTAAATCCCAATATTAGCGCCACTATTCAATTGGATGTTCAGGGAATAATCAATGATGCGTACTGTGCCCCCGTCATAAGTTGAGGACAGCAAGCG…
109	Chr01	6325525	5999661	C	CTAATATATATATATATATATATATATATATAATATA	36	ATGCTCTGCATTACCACAGGTAGGTAGGTGCATAGATGAAGGAGATAGTATTCAGACTTTCAGGGTGTGAGAGAGATAAGAGATTCAGTTCATTCCCATGTGTCGCAACAGTCAGATCGACAGCAACAGAAGCTGGAACAAACGTGAATGAACTTGATTATTCTAGCAATCGGACGCTGTTAAGCTCTCGTGCGAGCACTATTAAACTCAGGGAAGGAACTGTTCACATCTACTACAACTGTTCACGTCTGAGAATGAGACCAATCGGAGTCAGATTCTCTCGTCTACTCAAACTGGTATATGTATATCCATCCAATGATCTCACATCAAGTTCTGTTCAGCTATCTAACATCTCTCTCTGACCATACCTTTTTATTACAAGTTGCATTGTCACCTCAG…	AATGATGCTCTGCATTACCACAGGTAGGTGCATAGATGAAGGAGATAGTATTCAGACTTTCAGGGTGTGAGAGAGATAAGAGATTCAGTTCATTCCCATGTGTCGCAACAGTCAGATCGACAGCAACAGAAGCTGGAACAAACGTGAATGAACTTGATTATTCTAGCAATCGGACGCTGTTAAGCTCTCGTGCGAGCACTATTAAACTCAGGGAAGGAACTGTTCACATCTACTACAACTGTTCACGTCTGAGAATGAGACCAATCGGAGTCAGATTCTCTCGTCTACTCAAACTGGTATATGTATATCCATCCAATGATCTCACATCAAGTTCTGTTCAGCTATCTAACATCTCTCTCTGACCATACCTTTTTATTACAAGTTGCATTGTCACCTCAG…
110	Chr01	6336368	6010525	A	ACACACACACACACACACTCTCTCTCTCTCTCTCTCTCTCT	40	TTTTCATTTGTCTCATGCGTACATCATTGTTGCCAAATTCCTTTAGAACAAAAAAAAGGACCCATCTTCCTATTCTTGTGAAGAACGACTGTAAATCTCTCTTCTTTTTTTTTTTTACTTCCATGTTTACCAGACCTCCCAAGGAAAGAAAGGTATAGATGGCATTTGTACTCTTTACATCCAACTATGTAATATGGAAGTTTTGCCAATCCATGGTTATTAATCCAACCACTACTATGTCATGTCACCCATGTTCTTTGGGTAATTGGTCCCTGCTCTACATACACTTGGTGTAGTCCCACTAACTACACCTCATGTGGGTGTTTCCTGGTGGATTTTGTGGTTTGAACATGTGAGAGCTATCAGCTGTTGGTCCCTGAAAAGATAACTCTTGTCAAA…	TTTTCATTTGTCTCATGCGTACATCATTGTTGCCAAATTCCTTTAGAACAAAAAAAAGGACCCATCTTCCTATTCTTGTGAAGAACGACTGTAAATCTCTCTTCTTTTTTTTTTTTTACTTCCATGTTTACCAGACCTCCCAAGGAAAGAAAGGTATAGATGGCATTTGTACTCTTTACATCCAACTATGTAATATGGAAGTTTTGCCAATCCATGGTTATTAATCCAACCACTACTATGTCATGTCACCCATGTTCTTTGGGTAATTGGTCCCTGCTCTACATACACTTGGTGTAGTCCCACTAACTACACCTCATGTGGGTGTTTCCTGGTGGATTTTGTGGTTTGAACATGTGAGAGCTATCAGCTGTTGGTCCCTGAAAAGATAACTCTTGTCAA…
111	Chr01	6344442	6018502	G	GACGGCTCCGATCGTCCCCTTGCCGGATGAAGTGCC	35	ATAGATGTTAATATGTCTAAATTCATTAACATCTAAATGACTAGCAATAGTGCCCGTGCGTTGCAACGGGAAAAACACCGTTTGATAGTGTGACACCTTGAAAACCTTAAATCAGTAAAAATCAAGTCTAATTTGATATATTAACAAATAGGTAGAACCGAGTCTAATTCGATGTATTAGCAAAGGATTTAAGATTTAGTTTTAGATTTATTTTTCGAGCCTACTTAGGAGTTTATCCGATGGACTTTAATTTAAAAAATCTGAGCCATATTGTTTGATCAAATTTACTTTTGGCCCAGGTCTTCCCAAGCCGGCCCAAACTTGGGCTGGCCCATCTTCGGCGAGCCGAATCAATTCGACGGCCCGCGAGCTGAGCAGCTGACCATGGCACATATGCGG…	ATAGATGTTAATATGTCTAGATTCATTAACATCTAAATGACTAGCAATAGTGCCCGTGCGTTGCAACGGGAAAAACACCGTTTGATAGTGTGACACCTTGAAAACCTTAAATCAGTAAAAATCAAGTCTAATTTGATATATTAACAAATAGGTAGAACCGAGTCTAATTTGATGTATTAGCAAAGGATTTAAGATTTAGTTTTAGATTTATTTTTCGAGCCTAATTAGGAGTTTATCCGATGGACTTTAATTTAAAAAATCTGAGCCATATTGTTTGATCAAATTTACTTTTGGCCCAGGTCTTCCCAAGCCGGCCCAAACTTGGGCTGGCCCATCTTCGGCGAGCCGAATCAATTCGACGGCCCGCGAGCTGAGCAGCTGACCATGGCACATATGCGG…
112	Chr01	6392755	6091003	T	TGCGCGTGCGTTATGAGTGTCTGCGTTGTACT	31	GCCCGTTTGTTCGCGGATGTGTGTGTGTGTTGGGGGGGGGGGGGGGGGGGGGGGGGGGCGCCAACACGTGTCCTGTTGTGCAATCTCCGGTTGTCTTTTTTTTGCCTCTCGCATAGTCGAATTGTGACAACTGACGCGCGCGCGAGAGAGAGAGACAAGATAGAGAGGATTCGTGGGGGATGTGGAGCCATAGAAGTCCAGAAGATGGTCCAATACAACCTAGAACACTTTGAGCGATACCAGCCAACCAGGTGCATAGTCAAAAATGAACGCGGAAGATGCGAAAGGGTATGTAGTCTAATGGTTACAAGAGTCTCAGTAACCTGAGGTCATGGGTTCGACTCCCTATGGAAGCGAATTTTCTAGATTTTAACGGCGTTGTGTTTTCAGTTGGTAGCC…	ATGCGTCGTGGGCATATGCATGTGTGGGGGGGGGGGGGGGGCGGGGGGGGGGGGGGCGCCAACACGTGTCCTGTTGTGCAATCTCCGGTTGTCTTTTTTTGCCTCTCGCATAGTCGCATTGTGACAACTGACGCGCGCGCGAGAGAGAGAGAGACAAGATAGAGAGGATTCGTGGGGGATGTGGAGCCATAGAAGTCCAGAAGATGGTCCAATACGACCTAGAACACTTTGAGCGATACCAGCCAACCAGGTGCATAGTCAAAAATGAACGCGGAAGATGCGAAAGGGTATGTAGTCTAATGGTTACAAAAAGTCTCAGTAACCTGAGGTCATGGGTTCGACTCCCTATGGAAGCGAATTTTCCAGGTTTTAACGGCGTTGTGTTTTCAGTTGGTAGCC…
113	Chr01	6422231	6120578	CATAAAACTACAAGTTTAGTGATAATTTAATC	C	31	TACGTGGCGCGAGGGGAGAGGAGGAGCGTGGCGGCCACGGGCGCCATACATTCCACCGGGGATTCTCGTCGCCTCTTGGCACGTCGCGTCGGCGTCACGGACGGTAGCCGCCGCCTGCCGGGGAAAAACCGAAAAAGATTGTGCGCCACTGCTACACACGCTCGGTATTTTTCTCGCGCGTGTGTATCCTGTAATTGTACGCGTCTCTGTTAAGCGATCGGGCCTGTATCTGTGGGCTAAGCTACTAGTGGTGTGTTGGTGATAGGTACGCTGTCTCGCTACTATTACAGGTGGGATCTTCTGTATGTATATACTACAGTACACATGTGTTTTATTTTAAGTAAATTTCACAAACCTATGGATACTTTGATCAAATTATCACAAAACTGTAGATTTAGA…	AGAACGGTGGGATCCACCGAGGAAATACGATGCCACGAGACGGATCTCTCGCGAAAGGGATTCTCGTCGCCTCTTGGCACGTCGCGCGTCGGCGTCACGGACGGTAGCCGCCGCCTGCCGGGGAAAAACCGAAAAAGATTGTGCGCCACTGCTACACACGCTCGGTATTTTTCTCGCGCGTGTGTATCCTGTAATTGTACGCGTCTCTGTTAAGCGATCGGGCCTGTATCTGTGGGCTAAGCTACTAGTGGTGTGTTGGTGATAGGTACGCTGTCTCGCTACTATTACAGGTGGGATCTTCTGTATGTACATACTACAGTACACATGTGTTTTATTTTAAGTAAATTTCACAAACCTACGGATACTTTGATCAAATTATCACAAAACTGTAGATTTAGA…
114	Chr01	6432960	6131192	T	TCGGCCGGCCGGCCGGCATGTATGCTGCCAATATGCCATATCTG	43	GCAGAATGTTTGATTCCGATGATGGCATGCATGCAATGCAATTATGCAAATGAACACACATGGACGCACGCACGCACGCACGATCGATGCACGGATGGGGAATCTTGCACAGGGCGGGGAGAGGCGGTCAAGGGCTGGAGATAATCTCTGCGCTCTCTGCTGTCTGCAGTCTGCGCGCGCGCGCGCGCACACACACACCTGCAGATACTATGCGAGAGATTCAGAGAGATTCAGAGATTGGTTGGGCGGAGGTCGGCCGGGGTAGTACATGCGTTCATGTCGTGTTGGCTGATCTGATCAGAATCACGCAGTACGCCGGCCGGCCGGCCGGCTGGCCCGGATCATCAGCGATGGGACGGCGTCGCAGAGGCTGCGTGCGTGCATGCATGCGATATCAGC…	TCATTTATATTTATATGTATATACATACATATACCCAGCTAGCTAGCTAGCAGAGAAATGCAGAATGTTTGATTCCGATGATGGCATGCATGCAATGCAATTATGCAAATGAACACACATGGACGCACGCACGCACGCACGATCGATGCACGGATGGGGAATCTTGCACAGGGCGGGGAGAGGCGGTCAAGGGCTGGAGATAATCTCTACGCTCTCTGCTGTCTGCAGTCTGCGCGCGCGCGCGCACACACACACACCTGCAGATACTATGCGTTCATGTCGTGTTGGCTGATCTGATCAGAATCACGCAGTACGCCGGCCGGCCGGCCGGCTGGCCCGGATCATCAGCGATGGGACGGCGTCGCAGAGGCTGCGTGCGTGCATGCATGCGATATCAGC…
115	Chr01	6445961	6144299	A	AAAAAATCTTCGCTGGCTGCAGCCTTATGAG	30	ATATGTCTTGAGATTAGTGAACTCACACATAAGTGTTTTGTTGTCAGTATGTTGCACATCAATGAAAGGGTAATTAGCCCTAAATGCAACGCGCACATGTATACCCTATTTTTATTCTTATGTGTACCTTCAAAGACTAGACTAATATATATCTTATGATTGACGAAGTTACCATGAACGTCTCATCGTTAACTTATATGTTGCCTACCACTAAACAAATAATTAGCTCTAATTCAAGTTAGAAGAGTATGTTCCATTAACCACAAAGAATCTAACCAGCTGAATTCCACTACTACGAAAACTATCTTTCGTGGCGGTCATTTTCAGTTTTTGCTGGCGGAATTTAGAGCCGCCACAAACCAAAGGCCAGTGAAAATCAAGATATTCGCTGACGATTAT…	TATGTCTTGAGATTAGTGAACTCACACATAAGTGTTTTGTTGTCAGTATGTTGCACATCAATGAAAGGGTAATTAGCCCTAAATGCAACGCACACATGTATACCCTATTTTTATTCTTATGTGTACCTTCAAAGACTAGACTAATATATATCTTATGATTGACGAAGTTACCATGAACGTCTCATCGTTAACTTATATGTTGCCTACCACTAAACAAATAATTAGCTTTAATTCAAGTTAGAAGAGTATGTTCCATTAACCACAAAGAATCTAACCAGCTGAATTCCACTACTACGAAAACTATCTTTCGTGGCGGTCATTTTCGGTTTTTGCTGGCGGAATTTAGAGCCGCCACAAACCAAAGGCCAGTGAAAATCAAGATATTCGCTGACGATTATC…
116	Chr01	6448753	6147115	T	TACCAGAAAGAACACAAAATAAAGAATAAAA	30	ATGGTGGTGATTGTGGCGGCGGCAGAGGTAGTGGGGATGGGTGAGGAGTAGGGGAGCGGGCGCAAGAGGAGGAATGGCCTGGAGGAGGGCGACGAGAAGGTAGGTGGAAGGAAGAGGAGAGAGAGGAAGAGGAGAGAAAAAGATGTTGACATGTGAGGATCCAGGTCCTTTAACCAGTAGTGTATCTAGGATGAAAATAGAGAGGGTGCCTTGTTCGAATGGGAATTTCGGACGAGCAATCATCTAGCTTATCAGAATTCAGACAAGCCTCTTAATTAACGTATAATTAGTTAAGTGTTCACTCTTATAAACTTTAAATTTTGATTTAATTGAATTTTGAAGAAACTTCTCTATAATAAGTTTTTTGAAAAATCACAATGTTTAATGGTTTGACAAAGA…	ACACCAGCGGATGGTGGTGATTGTGGCGGCGGCAGAGGTAGTGGGGATGGGTGAGGAGTAGGGGAGCGGGCGCAAGAGGAGGAATGGCCTGGAGGAGGGCGACGAGAAGATAGGTGGAAGGAAGAGGAGAGAGAGGAAGGAGAGAAAAAGATGTTGACATGTGAGGATCCAGGTCCTTTAACCAGTAGTGTATCTAGGATGAAAATAGAGAGGGTGCCTTGTTCGAATGGGAATTTCGGACGAGCAATCATCTAGCTTACCAGAATTCAGACAAGCCTCGTAATTAACGTATAATTAGTTAAGTGTTCACTCTTATAAACTTTAAATTTTGATTTAATTGAAATTTGAAGAAACTTCTCTATAATAAGTTTTTTGAAAAATCACAATGTTTAATGGTTT…
117	Chr01	6459774	6158274	TTGATTTAAAAAACTTAAGGTAAATTATTATG	T	31	AATTGGAATATTCTTTATGAATATAATGAAAAAATTGTATCAATTGTTCCACAGATTTATATATACATGACCTCTAATTGTTTGCTTATTTACCTTGATGAGCTAAATAAAGTATACGTCATATATCTGAATTGGGAATAAATCAATCATCGTGATATAAGGAAGCATTGAAATCGTGAGAGAATCATTTCCTCCATTAGCTAAACAAAAATTTGTGAGAACCATTTCCTCCATTAGCTACTTAAAGAGGCCAACAGAGCATGCATACTCAATTCACTTCAAATACACCGAAATAGGCACTGGCAGAATATGGAGGAACAAATCCCTTGTACTTGGTAGCACCAATAGAAAAATCTCTTCATAGAAGTAGCACCAGCAGCTTGACGAAATATTGTTATC…	CAACAATTGGAATATTCTTTATGAATATAATGAAAAAATTGTATCAATTGTTCCACAGATTTATATATACATGACCTCTGTTTGCTTATTTACCTTGATGAGCTAAATAAAGTATACGTCATATATCTGAATTGGGAATAAATCAATCATCGTGATATAAGGAAGCATTGAAATCGTGAGAGAATCATTTCCTCCATTAGCTAAACAAAAATTTGTGAGAACCATTTCCTCCATTAGCTACTTAAAGAGGCCAACAGAGCATGCATACTCAATTCACTTCAAATACACCGAAATAGGCACTGGCAGAATATGGAGGAACAAATCCCTTGTACTTGGTAGCACCAATAGAAAAATCTCTTCATAGAAGTAGCACCAGCAGCTTGACGAAATATTATTATC…
118	Chr01	7052676	6751000	CAATACTTTTACTTTTATTACTGCCATATTAATTATCTTGTTGCTG	C	45	GTGCTACACACATTTTGCATCCACTTGTTTAAGCTTATGCTTTAGGAAATGTGCTGCTCTGCCCCGGCAAACACGTTGCATTAGGAAATGTGCTACTCTATAGTGAACTGCGGAATTAATTCCTCACCATGTTTTTTCTTTGGGGATACAGACTGCATTGCATTGAGAAACGCCATTATGCCAATGAAAATTTCTCCATATGCTTCCTATACTGGTTCACATAGTGTTCAACACTGTAAGTTCCCGACAGCTGGAACTTACAGCATCCTCACTTCCTGTGCCCATGTTCTGAACCGTTCCATATGCATTTCCCACTTGATGTTATTTCAAATTGCTGTGTTCCACTTTTGGGCCATATATCTGGCAGTAATTCAAACAAATATAGTTTTGCCAAGAGTT…	GCTACACACATTTTGCATCCACTTGTTTAAGCTTATGCTTTAGGAAATGTGCTGCTCTGCCCCGGCAAACACGTTGCATTAGGAAATGTGCTACTCTATAGTGAACTGCGGAATTAATTCCTCACCATGTTTTTTCTTTGGGGATACAGACTGCATTGCATTGAGAAACGCCATTATGCCAATGAAAATTTCTCCATATGCTTCCTATACTGGTTCACATAGTGTTCAACACTGTAAGTTCCCGACAGCTGGAACTTACAGCATCCTCACTTCCTGTGCCCATGTTCTGAACCGTTCCATATGCATTTCCCACTTGATGTTATTTCAAATTGCTGTGTTCCACTTTTGGGCCATATATCTGGCAGTAATTCAAACAAATATAGTTTTGCCAAGAGTTCT…
119	Chr01	7086282	6781781	T	TTCGGTGAATCACTTGAGCCCTGAGACATTTTCGGTGCC	38	AGTACTTCTGTAATTTGTATAGGTCAGTTCAATTCTCGGAGAAGGTTCAGAGCAGAGGTAGACGAAGCAGGAGAGAGCACCTGTGCTTTTCCGGCCCATGTCTACGGGAGACCCACGTCGGCGCATGTCCGGCCGGCCCAATTCTTCCGGAATTACAGCCCAGTTCACGTGAAGACTGGGCCTTCTAAATGGACCATGGTTGAGCCCATTTGTGAACCGGCCCATCTATAACGAGCCCATCCTAACTTAATTTGGGTATCTTTTGTGTGTGTTGCCGGTGTTGGTCGTGTGAAACACTACTCTTCTGATCCATCGATGAATCTTGAGCGATTACAGCAATCATTCATTCATCTTCTGACGTAGTAGTGATTTCGTTTCTGCAGTACTCTTGAACACGCT…	AGTACTTCTGTAATTTGTATAGGTCAGTTCAATTCTCGGAGAAGGTTCAGAGCAGAGGTAGACGAAGCAGGAGAGAGCACCTGTGCTTTTCCGGCCCATGTCTACGGGAGACCCACGTCGGCGCATGTCCGGCCGGCCCAATTCTTCCGGAATTACAGCCCAGTTCACGTGAAGACTGGGCCTTCTAAATGGACCATGGTTGAGCCCATTTGTGAACCGGCCCATCTATAACGAGCCCATCCTAACTTAATTTGGGTATCTTTTGTGTGTGTTGCCGGTGTTGGTCGTGTGAAACACTACTCTTCTGATCCATCGATGAATCTTGAGCGATTACAGCAATCATTCATTCATCTTCTGACGTAGTAGTGATTTCGTTTCTGCAGTACTCTTGAACACGCT…
120	Chr01	7090371	6785901	TATATATATATATATATATATATATATATATATATATATATATAGAC	T	46	CATGACTATTTTATAACACTGTTACTACGAAAAGTAGTCGTGTTACTACATATTGATTGTCGTGTTACTAGGCCGTACCCGCGAGACGAGAACTAAAAAAAATAAATCTCAATCTTTAGAGAGCAATATCTCTCACGTTATATATTATTTTTCTATTCCGTCTGCACCATAATATTCATAAAAAAGTGCTTAACAAAACTAGATCCATCATGACTATTTTTCAATATTGTTACTACGAGAAAGTTGTCATGTTACTACACAATAACTGCTATGTTACTGCGGAATTCCTGCGAGACGTGAACAACCAAGTGGTGAGCGGGGGAGGGAGTCAATGGGCGGTTTGACTCGAGTTTGACCGGTGAGAGAGGGCTTTGACCAGCCTTTGACTGAGGTGGGAAG…	CATGACTATTTTATAACACTGTTACTACGAAAAGTAGTCGTGTTACTACATATTGATTGTCGTGTTACTAGGCCGTACCCGCGAGACGAGAACTAAAAAAAATAAATCTCAATCTTTAGAGAGCAATATCTCTCACGTTATATATTATTTTTCTATTCCGTCTGCACCATAATATTCATAAAAAAGTGCTTAACAAAACTAGATCCATCATGACTATTTTTCAATATTGTTACTACGAGAAAGTTGTCATGTTACTACACAATAACTGCTATGTTACTGCGGAATTCCTGCGAGACGTGAACAACCAAGTGGTGAGCGGGGGAGGGAGTCAATGGGCGGTTTGACTCGAGTTTGACCGGTGAGAGAGGGCTTTGACCAGCCTTTGACTGAGGTGGGAAG…
121	Chr01	7691467	7614786	ATATATATATATATATATATATATATATATATATATA	A	36	GTAAACGAACGAGCAAAGCAAAAGCAGGGAACTAACTTGTGCGGCTAGTACGTGTGCGAGTATTGCCACTGCCTTGCAAACCAAATCATCACCACAAGAGAGCTCGATGTACGTACAAATAAATTCAAAATTTCATTACGTATCGATTTGTTGTTTAATTACTAATTAATTTCATACATTCATATAGTTTATTCGCATGAGGGATAACTTTATCACACACAAGGAATTTATCGCGGCGGTTCAAAAACAACTCATGGGATTTATCAACGAACAAATCCTTGATCCCAAGGGTGAATTCTACTACGACGGAAATACAGTTCATAGGTCCTTAGTTTCTGAGATAGCGACTACTACTACGTCGAAATCGTAGCTAGCTAGGACATAATGGATTGTAATTAA…	GTAAACGAACGAGCAAAGCAAAAGCAGGGAACTAACTTGTGCGGCTAGTACGTGTGCGAGTATTGCCACTGCCTTGCAAACCAAATCATCACCACAAGAGAGCTCGATGTACGTACAAATAAATTCAAAATTTCATTACGTATCGATTTGTTGTTTAATTACTAATTAATTTCATACATTCATATAGTTTATTCGCATGAGGGATAACTTTATCACACACAAGGAATTTATCGCGGCGGTTCAAAAACAACTCATGGGATTTATCAACGAACAAATCCTTGATCCCAAGGGTGAATTCTACTACGACGGAAATACAGTTCATAGGTCCTTAGTTTCTGAGATAGCGACTACTACTACGTCGAAATCGTAGCTAGCTAGGACATAATGGATTGTAATTAA…
122	Chr01	7992300	7914600	A	ATATATATATATATATATATATATATATATATATATATAT	39	GGTAACAAGTTTGCGTTTCACTTTTTATATTCTGGGAGTAACAAGTTACAAATAGACTTCATGCTATATACTCCATCCGTCCCTAAATATTTGACGCCGTTGACTTTTTTAAACATGTTTGATCGTTTATCTTATTCGAAAACTTTTGTGAAATATGTAAAACTATATGTATATTTAACAATGAATCAAATGATTGGAAAAGAATTAATAATTACTTAATTTTTTTGAATAAGACGAATTGTCAAACATGTTTAAAAAAGTCAACGGCATCAAATATTTAGGGACGGATGGAGTATATCTCTACTATTATAAAAATTTTTGCCGGTACTTTTTGTACGTCATCCGTGTATGAGTCGGTTTTGAAGTTCGTTCGCTTTTTTTAAATACATGAGAAGTTGT…	GGTAACAAGTTTGCGTTTCACTTTTTATATTCTGGGAGTAACAAGTTACAAATAGACTTCATGCTATATACTCCATCCGTCCCTAAATATTTGACGCCGTTGACTTTTTTAAACATGTTTGATCGTTTATCTTATTCGAAAACTTTTGTGAAATATGTAAAACTATATGTATATTTAACAATGAATCAAATGATTGGAAAAGAATTAATAATTACTTAATTTTTTTGAATAAGACGAATTGTCAAACATGTTTAAAAAAGTCAACGGCATCAAATATTTAGGGACGGATGGAGTATATCTCTACTATTATAAAAATTTTTGCCGGTACTTTTTGTACGTCATCCGTGTATGAGTCGGTTTTGAAGTTCGTTCGCTTTTTTTAAATACATGAGAAGTTGT…
123	Chr01	8132697	8055140	GAATTCGTTCATTTGCATCGAAGTCGGGGGCTACTGTCAGGGTTAT	G	45	GAAAATTCTATTCGACATTACCGAAGACTCCATGTCTCTATGGTTCTACACCAAGATCGACTAAGGCGAGTACGACAAATGTCGACAAGGCTCCGTCGTAGACTCTACGCCTTCTCGATCGCTTGAGAATGGTTGCTGGATCTCGACAAGGAATACGGAATGAAGAGATGGTGTACCCGCCGAGATAAAATTTCTTGACTTCAATCCAAATTCTCGATTACAGCAAGACATGAGACTTAGTCGTACGCTCTATACTTTCTCAGTCGACATCAGAGATTAACTTAGACAAACCCTTTCGGTGCCCGCACGAGGCTGACAAAGGAAGTTCAACGTTATCTCTAAACTCACCGAGAACGGTCACATGAGCTCGATAACAGTTACTCCAATGTCTGCGCGCGG…	GGGGCTATTTCTATCTAATATTCTTTTCTGAGTATTGATTTCAGGAAAATTCTATTCGACATTACCGAAGACTCCATGTCTCTATGGTTCTACACCAAGATCGACTAAGGCGAGTACGACAAATGTCGACAAGGCTCCGTCGTAGACTCTACGCCTTCTCGATCGCTTGAGAATGGTTGCTGGATCTCGACAAGGAATACGGAATGAAGAGATGGTGTACCCGCCGAGATAAAATTTCTTGACTTCAATCCAAATTCTCGATTACAGCAAGACATGAGACTTAGTCGTACGCTCTATACTTTCTCAGTCGACATCAGAGATTAACTTAGACAAACCCTTTCGGTGCCCGCACGAGGCTGACAAAGGAAGTTCAACGTTATCTCTAAACTCACCGAGAAC…
124	Chr01	8321532	8341481	T	TTCATGATTTAAAAATACTACATATATTTAGT	31	GACGACGCCGTCGACGTCGGCACGGTGAGGAAAGACGACGACGCCGCGTCGGCGCCGACCAGCCGGCGCTGCATCGTGGTCGACGTGGAGTCGACGCCGTGGCAGAAGCTGCGTATGCCGCTGCGGCGCCGCATGGTGTAGACACTAATCGAGATAGAAGAGGGGATCGATCGACGCCATGTCAGGTTTGGTTGGAGAAAAGTATATAAGCTTAATTAGGCGTGTACGCGTGTACGTGGATCGGAGGAGGTTGGCGCGGGCGCTCGTGATAGGGTTTAAAACGGGATGGGGATCGTGCGGCGTCGACGCATGAGTCGAGTGAATGTGATGTGGAGGTGGAGGTGGCGCAGCAATTGGGATCACATGAGAGGAACGTACGTCTCATGTGCCTACGTATGA…	GACGACGCCGTCGACGTCGGCACGGTGAGGAAAGACGACGACGCCGCGTCGGCGCCGACCAGCCGGCGCTGCATCGTGGTCGACGTGGAGTCGACGCCGTGGCAGAAGCTGCGTATGCCGCTGCGGCGCCGCATGGTGTAGACACTAATCGAGATAGAAGAGGGGATCGATCGACGCCATGTCAGGTTTGGTTGGAGAAAAGTATATAAGCTTAATTAGGCGTGTACGCGTGTACGTGGATCGGAGGAGGTTGGCGCGGGCGCTCGTGATAGGGTTTAAAACGGGATGGGGATCGTGCGGCGTCGACGCATGAGTCGAGTGAATGTGATGTGGAGGTGGAGGTGGCGCAGCAATTGGGATCACATGAGAGGAACGTACGTCTCATGTGCCTACGTATGA…
125	Chr01	8349307	8376182	AACACCCGCATTAGCTTAAACTTGATATAAAGCAGAGTAAATTAAACA	A	47	TATTGGATCCAGCTGGACCGCATCTATAACTCTCTTGCGTTTTGCATCGTCGCTTTTATCCTTACAAGCTGGTGCTGCTCTAGCTGACTAGTGAGGAACTAAATTGCTACAGTAACGCGATGCTACAGTACCACGCTGGTACTGTGCAGGGCTGCTGCTCCTGCTATTGCTCTGCCTGCTGCTGGGCTGCTGGTGCTACTGTTCTGCTGGGCCGCCGGCTAGCTGGGCTGGGCTGGGCTGCATGCTGCATTGCTGTTTGCTGCTGCTGCTGCTCTGCTTTTCTCTTTTTTCTTTTTCTCTTCTTTTTTCTTTATTCGCTAATTATTTGCGGGGCTTCACATGGCAGGGCCGGAGGTAGAGTATTGAGGGGTACCTAGAAACCCGGTTAAGAAAAATTTG…	GCGAACGGCCGTCTGCCACGTCACTTTCGCCACCCTCTGGGATGGCGATTTTTAAAAATCGCCCTCCCAGAGGGCGGTAGGCGACCACTTCTGTCAATTTTCAAAATGAAAAATTATTTTTGTAAAACTTTTAATAAAAAAATTAAAAATAAAAAAAAAATTCCTATTGCTCTGCCTGCTGCTGGGCTGCTGGTGCTACTGTTCTGCTGGGCCGCCGGCTAGCTGGGCTGGGCTGGGCTGCATGCTGCATTGCTGTTTGCTGCTGCTGCTGCTCTGCTTTTCTCTTTTTTCTTTTTCTCTTCTTTTTTCTTTATTCGCTAATTATTTGCGGGGCTTCACATGGCAGGGCCGGAGGTAGAGTATTGAGGGGTACCTAGAAACCCGGTTAAGAAAAATTTG…
126	Chr01	8411895	8452253	T	TATATATATATATATATATATATATATATATATATATATATATAT	44	GGACTGGCTCAGCTCGATGCCACTCTGCTCATCGCCAGCCTCCTCGGCTGGCTCAGATCATCGTGTGCTCGCCGTCTCCCAGCCACCTCCGCTGCCTCCGTTATGCATGCAGAGACCGGCGAAGCCGGTCGCCTCTTCCATCTATCAGGCAAAACCGGATCGAGTAGTAGCGCAGTACAGTGGAGCATGAGAATTGGAAGATAGAGATGGACGGGGAGGCCACCGCACCGCTCCCAAAGACCACATGCGAACTTGCAGGTGGCATTGACTCCTGGCATTTTTTTATTTTAAACCCTAATAGTATCTTTTATATATCCTATACTTCAGTAAATACAAAATATTTTTAAAAATACCCCTAGGTTAGTACTCGCACATTAATATCCAGGACCTTGGAAGTTT…	GGACTGGCTCAGCTCGATGCCACTCTGCTCATCGCCAGCCTCCTCGGCTGGCTCAGATCATCGTGTGCTCGCCGTCTCCCAGCCACCTCCGCTGCCTCCGTTATGCATGCAGAGACCGGCGAAGCCGGTCGCCTCTTCCATCTATCAGGCAAAACCGGATCGAGTAGTAGCGCAGTACAGTGGAGCATGAGAATTGGAAGATAGAGATGGACGGGGAGGCCACCGCACCGCTCCCAAAGACCACATGCGAACTTGCAGGTGGCATTGACTCCTGGCATTTTTTTATTTTAAACCCTAATAGTATCTTTTATATATCCTATACTTCAGTAAATACAAAATATTTTTAAAAATACCCCTAGGTTAGTACTCGCACATTAATATCCAGGACCTTGGAAGTTT…
127	Chr01	8513112	8553361	CATCACCGCGTCCCTCAATAAGGTTCACTAGTTTCATC	C	37	GAGCCTATGCAACATGCTCTAGGCGTAGTTGAGGTCGACAAACGACCACCGCCGGCGACAAGCTAGAGCTAGAGCTCGCCTGGTAGAGATGGTAGTGGCAATGGTGGCCAATGAGCCCATCCATTGTTGCTAGGCACATCACCCCCAACTATGCGTCCATCTGCTACCATTGATCACGTTGGCTCTGGTAGTCGAGCTTGCTTCAATCGCACAAAGTCGTTAGCGTCAAGGACTATGTTACGGAGCTCAAACATATGCTATAGGTGGTCGAGACGGAGCTTGCAAGTGTGCAAGTGGAGTTGGAGATGGAGAGGACCAAGAAGAATGCCACCGTGCCTCCCCCACCACGCCTCGCTGCTCGGCTGCTCGCGTCCTCGACGAGGTCGGACGTTGCAGCTG…	AGCCTATGCAACATGCTCTAGGCGTAGTTGAGGTCGACAAACGACCACCGCCGGCGACAAGCTAGAGCTAGAGCTCGCCTGGTAGAGATGGTAGTGGCAATGGTGGCCAATGAGCCCATCCATTGTTGCTAGGCACATCACCCCCAACTATGCGTCCATCTGCTACCATTGATCACGTTGGCTCTGGTAGTCGAGCTTGCTTCAATCGCACAAAGTCGTTAGCGTCAAGGACTATGTTACGGAGCTCAAACATATGCTATAGGTGGTCGAGACAGAGCTTGCAAGTGTGCAAGTGGAGTTGGAGATGGAGAGGACCAAGAAGAATGCCACCGTGCCTCCCCCACCACGCCTCGCTGCTCGGCTGCTTGCGTCCTCGACGAGGTCGGACGTTGCAGCTGC…
128	Chr01	8736030	8779761	CAGATATATATATATATATATATATATATATATATATATATATATATATATATAT	C	54	GTAGTACTAGTATTACACTTTGTATGATCCCCTGTTTTTCCGCATGTAAGATAGATAATGTCAAACATACTATGCAGCAGCACACCATGAAAATCCAGAAATGATAATAAAATCTTGAGAGGATATATATAACCTCTCGTCTTTTTTAATGTCATCTAAATAGCTATTAAATTTTTTAACAAGATAGATTAATATGTGATATATCACTTTATAGATATGTAAATTCAAATACTACTAATTTCGAGGAACTGAAAATTAATTGATTCAACGTGAGATCATGATCATGCTGTGATTTTTTTTCTGCATTTTGTAAGTTTGAGGGATAGGTGTGGTAAATTGAGTGGTCGATTCATTAACCATCACGTTCATCAAAACAATTAATTTTTTTAAGAAAATGGA…	GTAGTACTAGTATTACACTCTGTATGATCCCATGTTTTTCCGCATGTAAGATAGATAATGTCAAACATACTATGCAGCTGCACACCATGAAAATCGGGAAATGATAATAAAATCTTGAGAGGATATGTATAACCTCTCGTCTTTTTTAATGTCATCTAAATAGCTATTAAATTTTTTAACAAGATAGATTAATATGTGATATATCACTTTATAGATATGTAAATTCAAATACTACTAATTTCGAGGAACTGAAAATTAATTGATTCAACGTGAGATCATGATCATGCTGTGATTTTTTTTCTGCATTTTGTAAGTTTGAGGGATAGGTGTGGTAAATTGAGTGGTCGATTCATTAACCATCACGTTCATCAAAACAATTAATTTTTTTAAGAAAATGGA…
129	Chr01	8751359	8795237	G	GAAGCTATAAAGTTGAGAATAAAGGAATATAGGTCAAGGGT	40	GTTTGAGCCGTAGCGTCCAAATACAAGATACAGATACAAGACAAGCCTTCAGGCTAAGTTTGATGTGTACAACAGCACAAGATCATCGTACCAAATCGAAGTACTGATCTAAAAAAAAATCGAGGCATATTTTGCAGTACATCAGAATGGTTGTGTGGCGAACAGAAAAATATACACTTTACTACGGAGGTATAGGCATTGCAGCAGCACTGTCCTATGACACGTGGCTTCTCAGATGTAACGTACTAAAAATCCTCAATAATAAAAATCACTAAAATTTTAAACTTTTTAAAACTTTTGCATCATGCTGGTGTTATTCGTTTCTCTATTGCAAATATATTGTTTAAATTAAATAATATAAGATAAGTAAGTTGAGATGGAAGTCAAATAATAAAATAC…	AGTGTAAAAACTCTCACAGTCGATGGAATTTCAGAGCTGAATGGACAGTCATGGCACATGGCAGTTTGAGCCGTAGCGTCCAAATACAAGATACAGATACAAGACAAGCCTTCAGGCTAAGTTTGATGTGTACAACAGCACAAGATCATCGTACCAAATCGAAGTACTGATCTAAAAAAAAATCGAGGCATATTTTGCAGTACATCAGAATGGTTGTGTGGCAAACAGAAAAATATACACTTTACTACGGAGGTATAGGCAATAAAAATCACTAAAATTTCGAACTTTTTAAAACTTTTGCATCATGTTGGTGTTATTCGTTTCTCTATTGCAAATATATTGTTTAAATTAAATAATATAAGATAAGTAAGTTGAGATGGAAGTCAAATAATAAAATCC…
130	Chr01	8755730	8799775	GTGATAAATTTAGTGTTAAATCTGTAGTTTTG	G	31	GAATCAATGGGATACAACAACGTTTCAATGCTTAGGAAATCCTCTTCGTAGTTGCATTTCAACAAGCCAACCCACCTGGCTTAATCTTTTCAAACGCATACATAAGCTTAGTTGAAATTAAGGGGGGTATCAGAAGAGATCCTAAGGTCGGGCTTAATAGTGAATAGTGATCCTGAAATCAGCATATTTCTGGATTTTTTTTTTCTGAGTAAATTTCATAAAACTATAGATACTTTGATTAAATTATTACAAAACTACAAATTTAAGTTAATGTATCACAAAACTACAAGTTTAAGGCTAAATATCGCAAACTACAAATTTAATAATAAAACTATCACAAAACTACAGATCTTAGAGTTTAAATCCTTAAGCACTAATGCTATGTTTGAGTTATGATGT…	ACGAATCAATGGGATACAACAACGTTTCAATGCTTAGGAAATCCTCTTCGTAGTTGCATTTCAACAAGCCAACCCACCTGGCTTAATCTTTTCAAACGCATACATAAGCTTAGTTGAAATTAAGGGGGGTATCAGAAGAGATCCTAAGGTCGGGCTTAATAGTGAATAGTGATCCTGAAATCAGCATATTTCTGGATTTTTTTTCTGAGTAAATTTCATAAAACTATAGATACTTTGATTAAATTATTACAAAACTACAAATTTAAGTTAATGTATCACAAAACTACAGGTTTAAGGCTAAATATCGCAAACTACAAATTTAATAATAAAACTATCACAAAACTACAGATTTTAGAGTTTAAATCCTTAAGCACTAATGCTATGTTTGAGTTATGATGT…
131	Chr01	8785089	8835641	C	CCTATATATATATATATATATATATATATATATATGACTTTGTTTTTATT	49	CCACAATCACGGTGTTATTCACAACGGGACAACAAACTTTACAAAGAAAGGAACCCTGGGCTGTACTCCTTCCATTCATTCACTTAACCTAATGATTTTGCACCATGACTGTGATACATGCCTTGGATAAACTTAATTAATCTATCAATATCTTTTAAATATCCAGCATGAACACATAAAAATGATATATGCAGATTTATTTGAATTAGTAATCAAACTTATTATATATATTATTCTAACAAAAAAATATGGTCAGTCATATCTCGAAGGCCTAAAAAATTAACATCATATATGTTTTTAACCAAGGTGTGCGTCTTCAATTTTTAACTTTTTATATATCTATATAAAAATATTTCAGTAAGAGTGTAACATCATAGAAACAATTTCAGTGGCAGATCT…	CCACAATCACGGTGTTATTCACAACGGGACAACAAACTTTACAAAGAAAGGAACTCTGGGCTGTACTCCTGCCATTCATTCACTTAACCTAATGATTTTGCACCATGACTGTGATACATGCCTTGGATAAACTTAATTAATCTATCAATATCTTTTAAATATCCAGCATGAACACATAAAAATGATATATGCAGATTTATTTGAATTAGTAATCAAACTTATTATATATATTATTCTAACAAAAAAATATGGTCAGTCATATCTCGAAGGCCTAAAAAATTAACATCATATATGTTTTTAACTAAGGTGTGCGTCTTCAATTTTTAACTTTTTATATATCTATATAAAAATATTTCAGTAAGAGTGTAACATCATAGAAACAATTTCAGTGGCAGATCT…
132	Chr01	8785663	8836280	ATATATATATATATATATATATATATATATATAT	A	33	TCCTAATAAATACAATACATGCATCTAATAGAATTAGAGGATGTAAGAGTGAATGATTTAAAGAATTAATAATTTAATGGAGAAGATGTCATAGTTAATTGTATGCATGCATGTATGCCTTATATTATGGAACATCTAAAAAAATGATTGTGCCTTATATTATGGAATGGAGGGAGTATATATAATAAAGAAATACATGTTTACTTTTTTAAAGAAAAAGCGCAGAGACCAAGGACAATAAAAATCTTCATTCTATAATTAATTATCATCAATTAAGGTGCTACGATGCATCGTCTTCCGTGAATTGCTTCATGTTTTAAATATTTCAAGGTTGCACCGATAGAAATTAATTTGGTTGGTAACATGCAGTGCATTCAATGATGCTTATTTACTCTTTGC…	TCCTAATAAATACAATACATGCATCTAATAGAATTAGAGGATGTAAGAGTGAATGATTTAAAGAATTAATAATTTAATGGAGAAGATGTCATAGTTAATTGTATGCATGCATGTATGCCTTATATTATGGAACATCTAAAAAAATGGTTGTGCCTTATATTATGGAATGGAGGGAGTATATACAACAAATAAATACATGTTTACTTTTTTAAAGAAAAAGCGCAGAGACCAAGGACAATAAAAATCTTCATTCTATAATTAATTATCATCAATTAAGGTGCTACGATGCATCGTCTTCCATGAATTGCTTCATGTTTTAAATATTTCACGGTTGCACCGATAGAAATTAATTTGGTTGGTAACATGCAGTGCATTCAATGATGTTTATTTACTCTTTGC…
133	Chr01	8799333	8849940	GGGAGACCAGGATAAAAAACCATATAACTCAACGGTTAATTAAG	G	43	GGCGGCGGGAGCGGCGGGGGGAGCGGCGTGGACGGGCCGAGCAGGAACGACGGGGCGTCCGGGAGCGGGGTGGCCGGCGCGGGCCGCGGGCTCGGTGTGGACGCGGCGCCGAGGAAGGCGGTCGTCGTCTCGGTGGCGTCGGGTCGCCGGGGAGGCTGTGTCATGTGGCGGTCGGCGGCGCTGCCGCCGGGGCAGCGCGGCGGCGGCGGCGGCGGCGGTCGTCTGGTCGGGGCGGGGAACGGCGCGGCGGCGGCGGCGGCGACGGCGGTGGCGAGGAGAGGGAACGCGCGACGTGCGGTTGGGAGAGGGGACGCCTTAATTTTGGAGAGGAAACCACACCGGCGTGCGTTGGCGCCAACTGATGGCCTTGCATGAAACGAGGAGGCCGTCAAGGTATTG…	GGGAGCGGCGGGGGGAGCGGCGTGGACGGGCCGAGCAGGAACGACGGGGCGTCCGGGAGCGGGGTGGCCGGCGCGGGCCGCGGGCTCGGTGTGGACGCGGCGCCGAGGAAGGCGGTCGTCGTCTCGGTGGCGTCGGGTCGCCGGGGAGGCTGTGTCATGTGGCGGTCGGCGGCGCTGCCGCCGGGGCAGCGCGGCGGCGGCGGCGGCGGCGGCGGCGGTCGTCTGGTCGGGGCGGGGAACGGCGCGGCGGCGGCGGCGGCGACGGCGGTGGCGAGGAGAGGGAACGCGCGACGTGCGGTTGGGAGAGGGGACGCCTTAATTTTGGAGAGGAAACCACACCGGCGTGCGTTGGCGCCAACTGATGGCCTTGCATGAAACGAGGAGGCCGTCAAGGTATTG…
134	Chr01	8810967	8861560	G	GTAGTGTAAATAAGGGAAGTCCTATAGAGTTGTTGGTAGTGCAGTAGTGTGG	51	GTTTCTACAATCTCTAGTAGAGTTGTTTGTTAACCTGGAGGTATTGGAGAGATTTTGCAGAATATATAACAAGCCATCCAAATTAGTTAAACGAAGGTGTCAACTAAAATGAACACACTGTACAACATGAACATAATGAGGCCAAAATGTGCGTGGGAGCTGGCTTAGGGTTGAAGTACATTATAGGTTGGGTATAATGGACTATTGGAGTTTAACAAGATGGGATGGGATTGAGGTCTCACTTCATTACCAGGGCTATGAAGATAACATGTGTCTGTCTGTATTCTTGTTTCTATATGGCGGGCCTGGAGTTTTTTTTTTCTCGAAAACGCAGGAGAGCTGCATTTCATTTCATTAAGGGGAAGAAAAAACAATACAAAAGCACACCACAAAGAAAAA…	TCTACAATCTCTAGTAGAGTTGTTTGTTAACCTGGAGGTATTGGAGAGATTTTGCAGAATATATAACAAGCCATCCAAATTAGTTAAACGAAGGTGTCAACTAAAATGAACACACTGTACAACATGAACATAATGAGGCCAAAATGTGCGTGGGAGCTGGCTTAGGGTTGAAGTACATTATAGGTTGGGTATAATGGACTATTGGAGTTTAACAAGATGGGATGGGATTGAGGTCTCACTTCATTACCAGGGCTATGAAGATAACATGTGTCTGTCTGTATTCTTCTTGTTTCTATATGGCGGGCCTGGAGTTTTTTTTTTCTCGAAAACGCAGGAGAGCTGCATTTCATTTCATTAAGGGGAAGAAAAAACAATACAAAAACACACCACAAAGAAAAA…
135	Chr01	8834117	8884749	A	AAATTCTACTTGAACACTACAAGATCTACTTG	31	TGGATGGAGTAATTTTTTTTAACACAAGGAAGTACGTGGGCACAGAGAATGAGTAAATCTCTTACATTATCATGCTCCTATTGAAAAAAAGCTTACGGGTGTGTAATATCGTGAATATCAGAATTAACCATGTGCAATGATGAATTTAGAAAAAAAAATCAATCATACTTTGCCTCGATATATCGCATACATCTATAATACTGTCTTCGGTTTTTAACGTATAACATTGTTGATTTTTGAGTTTTGACATAACTTTGATCTTGCGTTTTATTATGAAAAATACATAGTTATTAGTTTTTTGTTATAATTTGTTCTACCATTAAGGATATTTTAAAAATATTTTATATATTTGCATAAAATTTTAATTAAGATAAGATAAAACTGGATATGAGATACATC…	GGATGGAGTAATTTTTTTTAACACAAGGAAGTACGTGGGCACAGAGAATGAGTAAATCTCTTACATTATCATGCTCCTATTGAAAAAAAGCTTACGGGTGTGTAATATCGTGAATATCAGAATTAACCATGTGCAATGATGAATTTAGAAAAAAAAATCAATCATACTTTGCCTCGATATATCGCATACATCTATAATACTGTCTTCGGTTTTTAACGTATAACAATGTTGATTTTTGAGTTTTGACATAACTTTGATCTTGCGTTTTATTATGAAAAATACATAGTTATTAGTTTTTTGTTATAATTTGTTCTACCATTAAGGATATTTTAAAAATATTTTTTTATATTTGCATAAAATTTTAATTAAGATAAGATAAAATTGGATATGAGATACATC…
136	Chr01	8950932	9001597	ATATATATATATATATATATATATATATATAT	A	31	TTAATAACTATACTATTTAGGTTGCGTGCAATAAATAAGAGGATGTCCTCTTGAAAAATAAAAACTTAAAAGAGAGAAGTTGCTTTATTATGGGCCGCTAATGCTAAAGGTAACCGTGCATGCACTTCCATCGTTGATGATAATAATGACAAAGCAGAAAATTTATTTTCCTTCAGTTAATATAGACTACAGTGCAATTTCTATCGTGGACAATCTTTTGCACACCACTATTCTATAAACTCCCGAGGGTATGTACTCTCGTTGTTGCATGTCACTCTCAAATAATTATGTTTTTTTTAAAAAAATACCAACAAGTTAGACTAATATGTGATAAATTACTACACAAATATGCAAGGCAAAATTTAACTTCTACATGTTGAAAGAAAAAAATAAATTTGA…	TTAATAACTATACTATTTAGGTTGCGTGCAATAAATAAGAGGATGTCCTCTTGAAAAATAAAAACTTAAAAGAGAGAAGTTGCTTTATTATGGGCCGCTAATGCTAAAGGTAACCGTGCATGCACTTCCATCGTTGATGATAATAATGACAAAGCAGAAAATTTATTTTCCTTCAGTTAATATAGACTACAGTGCAATTTCTATCGTGGACAATCTTTTGCACACCACTATTCTATAAACTCCCGAGGGTATGTACTCTCGTTGTTGCATGTCACTCTCAAATAATTATGTTTTTTTTAAAAAAATACCAACAAGTTAGACTAATATGTGATAAATTACTACACAAATATGCAAGGCAAAATTTAACTTCTACATGTTGAAAGAAAAAAATAAATTTGA…
137	Chr01	9641791	9692397	A	AATATATATATATATATATATATATATATAT	30	TTGGAATTAGTGGAGAACTATGATATAGTTCAGGCTTCAGATTATATATTTGCGTGCTGGTTCCTCACTTTAAGTTGTTCAGAAAATCATTTGTACATTGGTATGAAGTATATTTTTATTTATACCAGACATAATTCTTCAATCTGATGTTACTTAGAATCTTTGAAATCCTCTCATTTCTCTTGCATAGAGTTTAACTTATTCAATCAGTCGTGTGTTCTCATTTCCAGCTTACCGCATGCATGCATTTGCTGATTTAATTTAATTAGATGCTCATGCAAAATTGTTCGTGCAGTTTCATGAAGTCCACTAATTTTATCGTTATATGTAACCTTGATGACACTTTTAGCTTCATTTTATGTTATGTGAATGTCGTTGATCTTGGTTCTTACCATAATG…	TTGGAATTAGTGGAGAACTATGATATAGTTCAGGCTTCAGATTATATATTTGCGTGCTGGTTCCTCACTTTAAGTTGTTCAGAAAATCATTTGTACATTGGTATGAAGTATATTTTTATTTATACCAGACATAATTCTTCAATCTGATGTTACTTAGAATCTTTGAAATCCTCTCATTTCTCTTGCATAGAGTTTAACTTATTCAATCAGTCGTGTGTTCTCATTTCCAGCTTACCGCATGCATGCATTTGCTGATTTAATTTAATTAGATGCTCATGCAAAATTGTTCGTGCAGTTTCATGAAGTCCACTAATTTTATCGTTATATGTAACCTTGATGACACTTTTAGCTTCATTTTATGTTATGTGAATGTCGTTGATCTTGGTTCTTACCATAATG…
138	Chr01	9689550	9740139	G	GACCCATCTCTCTCCTGAGATAATAGATGACG	31	ATCGTTTTGACAAGTTACCATTACGCACAAAAATCTAGCATCGTTTTGACAAGTTACTTGCAGCGCGTTCTTGTAGTTCTCTACAAATTATTGGATAACTAATGGGGATTTGTTGGTGTGCGTGAAATTTGGTAAAGTCTGAAATTTTAACTTTGGTTGATGAATCAACCTTACCTGACCTTTACTATAACGAACTTGGCTAGAATTTTGTGTGAAGGAACATGTCTATATAGCCCTAAAATTTTAGTGGAAATCTGCTTGGCACTGTGAACGTCGACAACTCGAAATACCTTATTATCTATGTACTGTAACCTCTAACCCCTAAGGTGGTTTTACTGATGTGGAAAAGATCAAATAAGCGGGTTTAATGACTAAGACGACATATTTGTACTTCAGTCT…	CCATGGAACAAAGAGAACCATTACGCACAGAAATCTAGCATCGTTTTGACAAGTTACTTGCAGCGCGTTCTTGTAGTTCTCTACAAATTATTGGATAACTAATGGGGATTTGTTGGTGTGCGTGAAATTTGGTAAAGTCTGAAATTTTAACTTTGGTTGATGAATCAACCTTACCTGACCTTTACTATAACGAACTTGGCTAGAATTTTGTGTGAAGGAACATGTCTATATAGCCCTAAAATTTTAGTGGAAATCTGCTTGGCACTGTGAACGTCGACAACTCGAAATACCTTATTATCTATGTACTGTAACCTCTAACCCCTAAGGTGGTTTTACTGATGTGGAAAAGATCAAATAAGCGGGTTTAATGACTAAGACGACATATTTGTACTTCAGTCT…
139	Chr01	9770516	14235966	G	GCTCCTCCGCCACCTCCTGCTGCACCATCTCCTCCGGCTCCACCGGCTCCTCCGC	54	CAAACCCAGGATGAAACCACCTGCCCCGTTGATGAGATCATGCAGCGGACATCATGTGAGCTGCATATTCCCTTCAAGAACTTATCAATCAAGGTATGCTCGTAGTTTGATGATTTTTGACTTGTACATTCCGCAAGTTGCTGCTTAGGTTGATTACTAATAGATAACCTCTCATCACGTAAAGGTGGCGTCGAGAATGACCATCCCAACGGACCTTTCCGGGACTTACCACTGCAGACCGATTCCAGCAGGATACTCGAGGGTCGAAGTTGAGCTGGTGGAAGCCGCGTACGAGAAACTCGAGTTGGACTACCCAGGAGGAGACGGTGAGACGCATCTACGAGACACAAGCCACGCCATCATACTATGGCGCAAGCGGTACATCATCCTTCCTGGGCA…	CAAACCCAGGACGAAACCACCTGCCCTGTTGATGAGATCACGCAGCGGACACCATGTAAGCTGCATATTCCCTTCAAGAACTTATCAATCAAGGTATGCTCGTAGTTTGATGATTTTTGACTTGTACATTCCGCAAGTTGCTGCTTAGGTTGATTACTAATAGATAACCTCTCATCACGTGAAGGTGGCGTCGGGAATGGCCATCCCAACGGACTCTTCCGGGACTTACCACTGCAGGCCGATTCCAGCAGGATACTCGAGGGTCGAAGTTGAGCCGGTGGAAGCCGCGTACGAGGACCTCGAGTTGGACTACCCAGGAGGAGACGGTGAGACGCATCTACGAGACACAAGCCACGCCATCATACTATGGCGCAAGCGGTACATCATCCTTCCTGGGCG…
140	Chr01	10176874	9916450	ATTATATCGGTATATCCTAAAATTAATAGAG	A	30	AGGACGGGAAATGACTAGGGTTGAGGGGATGTGGGCGAGAAGAGGTGCCACCCTGGTAATCTAACTAAGTTATACATCGCACAAAGTTCTCTTTTTTAGGGGCAAATCCTTTTTTTCATTGTATTTCAAGGATGTTGATTAGGTCCTATTTGGCAAATCTCAAGATCAAAATTTTTTAAGCGTGTTTATCATCATATCTCCAATTATCCATGAATATATAATTAGAATTAAATTAATTGATAATTTTTTGATGAATTATGTTGTTCCTATTTCTTTAAATATATAGATTTTAGACTACTGTAATTTAATTTACAAACTTCAGTTGCATTGATATGGGATTTGTAATTATGCCAAACAAGACCTGAAAGTATAGAGCTATATATATGTTTCCCGTTAATT…	AGGACGGGAAATGACTAGGGTTGAGGGGATGTGGGCGAGAAGAGGTGCCACCCTGGTAATCTAACTAAGTTATACATCGCACAAAGTTCTCTTTTTTAGGGGCAAATCCTTTTTTTCATTGTATTTCAAGGATGTTGATTAGGTCCTATTTGGCAAATCTCAAGATCAAAATTTTTTAAGCGTGTTTATCATCATATCTCCAATTATCCATGAATATATAATTAGAATTAAATTAATTGATAATTTTTTGATGAATTATGTTGTTCCTATTTCTTTAAATATATAGATTTTAGACTACTGTAATTTAATTTACAAACTTCAGTTGCATTGATATGGGATTTGTAATTATGCCAAACAAGACCTGAAAGTATAGAGCTATATATATGTTTCCCGTTAATT…
141	Chr01	10210722	9948743	T	TCGTCTATCGCTAGTGGCCGGTATAACACAACCGCCAGTGAAAAT	44	TCCGAGGGGAGGAGGCCGCCGCTGGGGAGGACGGATCCGCCCCGACGGCAGCGCGGGGTGCACGGCCGCAGGGCCTCGTGCGGTGAAGCGCGACCGTCGGCCTCCACCTCGTCAGTGTTGTTACGATCAACGCCACCGGGCTGCGGGGAGCGTGAAGCCGACGCCGCCGGGTCATGGGCGGTGGTGCTCGGTTGGTGCTCGGATTTCTGTGGATTTGTGTGCATTTTTGTGGATTTCTGTGGATTGTGAATGGAAAATTTCTATTGATTTGTGTGGATTTATGTGGATTGTGAATGGAAAATTTTGACTCTGAATGGAAATTTTTTTTATTGTGAACTGTTCATGTAAATTTATGTGAATTTATGAATTGAGGAGTGGATTTGGGAATAATTTGAACCG…	TCCGAGGGGAGGAGGCCGCCGCTGGGGAGGACGGATCCGCCCCGACGGCAGCGCGGGGTGCACGGCCGCAGGGCCTCGTGCGGTGAAGCGCGACCGTCGGCCTCCACCTCGTCAGTGTTGTTACGATCAACGCCACCGGGCTGCGGGGAGCGTGAAGCCGACGCCGCCGGGTCATGGGCAGTGGTGCTCGGTTGGTGCTCGGATTTCTGTGGATTTGTGTGCATTTTTGTGGATTTCTATGGATTGTGAATGGAAAATTTCTATTGATTTGTGTGGATTTATGTGGATTGTGAATGGAAAATTTTGACTGTGAATGGAAATTTTTTTTATTGTGAACTGTTCATGTAAATTTATGTGAATTTATGAATTGAGGAGTGGATTTGGGAATAATTTGAACCG…
142	Chr01	10279532	10012507	T	TACCACTCTGGAGTTCTTGCACCCAGGTTGCGAGTAGGAGCACAAAAGGTTGG	52	GACTCATGTAGATGGATCGGCAATGGATGTACGGTGACCGGCAGTCCAAAGAGTTTATTGACGGCGTGCACTATTTTTTGAGAGTGGCCGAAGCTAACAGGCAAAGGGGTTTTATTTGTTGTCCATGCAATAAGTGTAAGAATCAGAAGGAGTATTCTGCATCCAGGACTATTCATTTCCACTTGTTTGAGTCGGGGTTCATGCCAAGCTATAATTGTTGGACATCCCACGGAGAGCAAGGTGTTGAAATGGAAGAAGATGAAGTGGAAGACGACAATATTCCGGACTTTGCTCAGTACGTTGGATTTGAAGGAAATCAAATGGGCGAGGAGGAAAGGGATGCTGATGGTAACGACGTTGTGGATGATCTTGGTCAGATGTTGCAGGACGCCAAGGAGG…	GACTCATGTAGATGGATCGGCAATGGATGTACGTTGACCGGCAGTCCAAAGAGTTTATTAACGGCGTGCACTATTTTTTGAGAGTGGCCGAAGCTAACAGGCAAAGGGGTTTTATTTGTTGTCCATGCAATAAGTGTAAGAATCAGAAGGAGTATTCTGCATCCAGGACTATTCATTTCCACTTGTTTGAGTCGGGGTTCATGCCAAGCTATAATTGTTGGACATCCCACGGAGAGCAAGGTGTTGAAATGGAAGAAGATGAAGTGGAAGACGACAGTATTCCGGACTTTGCTCAGTACGTTGGATTTGAAGGAAATCAAATGGGCGAGGAGGAAAGGGATGCTGATGGTAACAACGTTGTGGATGATCTTGGTCAGATGTTGCAGGACGCCAAGGAGG…
143	Chr01	10326348	10088948	T	TACGGTTGTGCACGAGCGACCACAGTTGAAGCT	32	AATGCCATCCACAAGGCAGAATTTGACGACTCAAGACGACTTAAAAGGTGTCATCAACAGTAAACTAACTGTTTCTCCAAACATAAACCTTGTTTTTTACTACCATCAAGTGCTTCAGAGAGACGCATCTGATTTGTACGTACGCCATTATATTTTTCCCTGTTTGTGGAGATGGGCCAAGAAACAAGCATCACCTAACCAACTAAGAAATACCTGCTCAAACATGTTCTTTTGCAGCAAAAAAGGTAAAATAAAGCCGTGGATAGTGTTCTTGTGGGCGCAAATTAAAGCGGGAGAGAGAGAGAAGGGAGAGAGAGAATTGAAGCTATACCAATCGTCTCTGATGAGTCATAGCCAGTAACAGTTGGGCAGGCAAAAAAAAAAGAAACTAGAGGTGAG…	AACTTTCTGTCCTAATAATGCCATCCACAAGGCAGAATTTGACGACTCAAGACGACTTAAAAGGTGTCATCAACAGTAAACTAACTGTTTCTCCAAACATAAACCTTGTTTTTTACTACCATCAAGTGCTTCAGAGAGACGCATCTGATTTGTACGTACGCCATTATATTTTTCCCTGTTTGTGGAGATGGGCCAAGAAACAAGCATCACCTAACCAACTAAGAAATACCTGCTCAAACATGTTCTTTTGCAGCAAAAAAGGTAAAATAAAGCCGTGGATAGTGTTCTTGTGGGCGCAAATTAAAGCGGGAGAGAGAGAATTGAAGCTATACCAATCGTCTCTGATGAGTCATAGCCAGTAACAGTTGGGCAGGCAAAAAAAAAAAAACTAGAGGTGAG…
144	Chr01	10343992	10103770	ATTATATATATATATATATATATATATATTATA	A	32	CCCATAGGCATTTTAGAACTTTCATGCATTTTCTATCTCCTATTCAACCATAAATAAATATTCTAATAAACATGATGTACATAAGCTAATTGTCACGTGTATTTCCAAAATTTACTTCGTGCAGTGTTCAACGACCAAAACCATGAGGTCATGTAGTAAAAGTTGACCCATCGAAAATGCCCCACATGCATGGATAAAGTACAGGCTACAATCGAGTTGAGTTACATCTCCTTGATGGTAAAAATGACGACATCAATTAATAATATTCTGTACTCAAACTCTCAAAGCACATACTATATATTCATCATGTGTGTTCGTTGCATGCATGTGTTTATATGCTACAGTGTGAGTTGGTTGACAGAGATGTCTTAACAATTGAGTAACCAAGAAGTGGTGGAT…	CCCATAGGCATTTTAGAACTTTCATGCATTTTCTATCTCCTATTCAACCATAAATAAATATTCTAATAAACATGATGTACATAAGCTAATTGTCACGTGTATTTCCAAAATTTACTTCGTGCAGTGTTCAACGACCAAAACCATAAGGTCATGTAGTAAAAGTTGACCCATCGAAAATGCCCCACATGCATGGATAAAGTACAGGCTACAATCGAGTTGAGTTACATCTCCTTGATGGTAAAAATGACGACATCAATTAATAATATTCTGTACTCAAACTCTCAAAGCACATACTATATATTCATCATGTGTGTTCGTTGCATGCATGTGTTTATATGCTACAGTGTGAGTTGGTTGACAGAGATGTCTTAACAATTGAGTAACCAAGAAGTGGTGGAT…
145	Chr01	11921957	11716136	A	ATATATATATATATATATATATATATATATATATATA	36	ACTGGAATGAATTAGTTAGCTAAGCTATAATTATTCAGCTTCATATTCTTTATCAGCTAGATATATGGGCACCATGATTCAAATTGAGTATATACCCAATTCAAATAAGTATGAAATTTTTTTAAATGTTTAGGTATGAACATTAACTAGTTCAAAGTAAGTTTGAACTGAATTTGAACTTGTTTTTGTTAGATTTTGATTCTAAGTATATAACATCCAAACATATAATTAGTTATGTATGTAATATTGGATTATGAAATAAAGTTCAATTTGAGTTGTTTTGTTGCTAGGTATAGGTATGAATCAAATACTCACAATTTAAAAAATTTGGACGAATTTATGTATTTCATACCATGGTGCCCGGGTACAATGGTGCACCATACGAGTGTCCTATATAGT…	ATAATTATTCAGCTTCAGATTCTTTATCAGCTAGATATATGGGCACCATGATTCAAATTGAGTATATACCCAATTCAAATAAGTATGAAATTTTTTTAAATGTTTAGGTATGAACATTAACTATTTCATTAACTAGTTCAAAGCAAGTTTGAACTGAATTTGAACTTGTTTTTGTTAGATTTTGATTCTAAGTATATAACATCCAAACATATAATTAGTTATGTATGTAATATTGGATTGTGAAATAAAGTTCAATTTAAGTTGTTTTGTATCTAGGTATAGGTATGAATCAAATACTTATAACTAGGTATATACTCACAATTTGAAAAATTTGGACGAATTTATGTATTTCATACCATGGTGCCCGGGTACCATGGTGCACCATATGAGTGTCCTATA…
146	Chr01	11927343	11721558	CTTTCTCTCTCTCTCTCTCTCTCTCTTTCTCTCTCTCTCTC	C	40	CTGTGAAGGAAGGCAGGGGGCACATCTCATCGCAATCAATGGTGTTGGGCGAATTTGATGGCGTGCAGAGCAATGAAGGATAGGGAAAGGGAGAGGGAGTGGAGGAGACGGTGAGCCAAGGGAGCACGGGAGGGGAGTGGCAGCGTCCTCCGGGGTCACCATCACCATGACCACCATTGGAGTCGGAGATGCTGGAGGCAGGGCGTGTGCTGTTCAAGAACCTCGCCACCGACTTCGAGGACCGCCTCTACTCGGTCCCCCTCGATGATGTGCGTAGGCCATCGTCAAACACCGTCATCCTGGCGCCGAGGTGCGAAAGACGATGACAGCCACCGCCAACATTGTCCTAGCACCAAGGCCACAGACGATGACGACCACCATAGCAACGACCTGGGGGCA…	CTGTGAAGGAAGGCAGGGGGCACATCTCGTCGCAATCAATGGTGTTGGGCGAATTTGATGGCGTGCAGAGCAATGAAGGATAGGGAAAGGGAGAGGGAGTGGAGGAGACGGTGAGCCAAGGGAGCACGGGAGGGGAGTGGCAGCGTCCTCCGGGGTCACCATCACCATGACCACCATTGGAGTCGGAGATGCTGGAGGCAGGGCGTGCGCTGTTCAAGAACCTCGCCACCGACTTCGAGGACCGCCTCTACTCGGTCCCCCTCGATGATGTGCATAGGCCATCGTCAAACACCGTCATCCTGGCGCCGAGGTGCGAAAGACGATGACAACCACCGCCGACATTGTCCTAGCACCAAGGCCACAGACGATGACGACCACCATAGCAACGACCTGGGGGCA…
147	Chr01	11934297	11728526	C	CCGAGGGTATAGTGCAACGCCAAGGCAACACTCAAGGGCCCCAATGGCAAG	50	TGCTCGGCGTGCCATAATCTGCAGACGACGCCGCAGCTGAGCAGATCGGGGATCTCCAGAGAGCTGAAGACGGTGACGAGCAAGTCCGCCGGCAGATCAGACCAGTCGCTGCCACGGCGTTCGCCCGAGATTTCTCCGTTCATGGATTCCCACCCGCTCTTAATCTATCAATCAATCTACAGGACATATAGATATATTTTCAGAGACTCCTGTTGGGAGTCCTTATGTTATCAATGCAGAGGACATATGCTCCCAACAATATGGAGTAATTGACAATGTGAAGATTCAAGCTTTCAATCTTGAAACAGAGTGGAAATGTGAAAATGTGAAGATTCAAGCTTTCAATCTTTAAACAGAGTGGAAACATATTCAGCAGTGACCAATGATTCCATTCATTTG…	CGCAGCTGAGCAGATCGGGGATCTCCAGAGAGCTGAAGACGGTGACGAGCAAGTCCGCCGGCAGATCAGACCAGTCGCTGCCACGGCGTTCGCCCGAGATTTCTCCGTTCATGGATTCCCACCCGCTCTTAATCTATCAATCAATCTACAGGACATATAAATCTACAAATCAATCTACAGGACATATAGATATATTTTCAGAGACTCCTGTTGGGAGTCCTTATGTTATCAATGCAGAGGACATATGCTCCCAACAATATGGAGTAATTGACAATGTGAAGATTCAAGCTTTCAATCTTGAAACAGAGTGGAAATGTGAAAATGTGAAGATTCAAGCTTTCAATCTTTAAACAGAGTGGAAACATATTCAGCAGTGACCAATGATTCCATTCATTTGTA…
148	Chr01	11952466	11746736	TGTCATACACACACAACTTTTCAATTTTAACTTTTTCTATCAGATCA	T	46	AGGCTGAGTTCTTATCTCTACTTTCCCAACTCACGTCTTTCTTTTTCGCACGCACGCTTTTCAAACTGCTAAACGGTGTGTTTTTTGCAAAAAAAAATCTATATGAAAGTTACTTTAAAAAATCATATTAATCCATTTTTTTAATTTATTTTAGCTAGTACTTAATTAATCATGCACTAAACGCTGATTTATTTTGTGTGCCCAACCCTTGCTCCCGAACACACCCCAAGTGTAGAACCAACATCACCGCCTCACCGACCCGTGCTGTGCTGCCGCGGCAGAGCGTCCCCGAGCGCCCGCTACACGATTTAGCATGATAGATTAGTCTGTGTTTAGTTCACACCGAAGTTTGGAAGTTTGGTTAATATTGGTACGATGTGATAGAAAAGTTGTGTGTAT…	GGCTGAGTTCTTATCTCTACTTTCCCAACTCACGTCTTTCTTTTTCGCACGCACGCTTTTCAAACTGCTAAACGGTGTGTTTTTTGCAAAAAAAAAATCCATATGAAAGTTACTTTAAAAAATCATATTAATCCATTTTTTTAATTTATTTTAGCTAGTACTTAATTAATCATGCACTAAACGCTGATTTATTTTGTGTGCCCAACCCTTGCTCCCGAACACACCCCAAGTGTAGAACCAACATCACCGCCTCACCGACCCGTGCTGTGCTGCCGCGGCAGAGCGTCCCCGAGCGCCCGCTACACGATTTAGCATGATAGATTAGTCTGTGTTTAGTTCACACCGAAGTTTGGAAGTTTGGTTAATATTGGTACGATGTGATAGAAAAGTTGTGTGTAT…
149	Chr01	11983763	11766876	A	AGCTTTTGGCTTTATAGTGTAAGAGTGGCTTACTT	34	CCCGCGCCACTCCTGGTCATAGATCCGCTACCCACACCCCTTCCACAGCCGGTCCCGCGGTCTGCGGCCCTCCGGTGGCCAGGTCCGCTACCCTCGCCCCTCGAGTCTTCGTCACAGTTCATCGTCGCTGTTGAGAGGAAGAGGAGGAGAAGGAGGATGAGGAGAGGCTGGTGCCGCGAGGGTGGCAGAGGGGTTGAGATGGGGTGAAGGAGGAGGTGAAGTCCGAGTAGTTCTTTTTTTTTACAGTCAGTGCTCCTTAACCGCTAACAATGAAATCCGATTTTCATTGGCTATCACTTAATAGATCCACTTGCAAAAATAGATGTACTTTTGCAAGCAGATTTCTTAAGTGATAGCCAACGGCGGTCAGTGACCGGAATCCCTCTCAAGTATCTTTAC…	CCCGCGCCACTCCTGGTCATAGATCCGCTACCCACACCCCTTCCACAGCCGGTTCCGTGGTCTGCGGCCCTCCGGTGGCCAGGTCCGCTACCCTCGCCCCTCGAGTCTTCGTCACAGTTCGTCGTCGCTGTTGAGAGGAAGAGGAGGAGAAGGAGGATGAGGAGAGGCTGGTGCCGCGAGGGTGGCAGAGGGGTTGAGATGGGGTGAAGGAGGAGGTGAAGTCCGAGTAGTTCTTTTTTTTTACAGTCAGTGCTCCTTAACCGCTAACAATGAAATCCGATTTTCATTGGCTATCACTTAAGAGATCCACTTGCAAAAATAGATGTACTTTTGCAAGCAGATTTCTTAAGTGATAGCCAACGGCGGTCAGTGACTGGAATCCCTCTCAAGTATCTTTAC…
150	Chr01	12382896	12154692	T	TAGGCAGTAAAAAAATTTAACCAGTTGAAGT	30	GTGTTCACTGCTAGTACCTATTTACATCATCTTCTTTGTTTTTCAATTAATCAACCAAGAACGTTGGGAATAACTGAATAACTACATGAGAAACCTGAATAACTACATGAGAAATCTGTTTCCCTTCTACTGTTGTTGCTATAGGTTGAGATTTGACACTGTAACTATGGTGATTGAGCATATAGCCATATACGCACAAGTGCTCATAATTGCTCTGAAATTGCAATGCTCCACGTGGATATTGTGTATTGCAGCTACAGTATATTTGTGGTTACATCTTGGTTTTCTTCTTTCTACGAACTACACTAATAGAAAAGGGATTATTTTAAAATTGGGCCACTAAGATAGATGATACAAAGCACCTTTCAATTGGAGGGCTGAAAATTAAAATTAGATCAT…	GTGTTCACTGCTAGTACCTATTTACATCATCTTCTTTGTTTTTCAATTAATCAACCAAGAACGTTGGGAATAACTGAATAACTACATGAGAAACCTGAATAACTACATGAGAAATCTGTTTCCCTTCTACTGTTGTTGCTATAGGTTGAGATTTGACACTGTAACTATGGTGATTGGGCATATAGCCATATACGCACAAGTGCTCATAATTGCTCTGAAATTGCAATGCTCCACGTGGATATTGTGTATTGCAGCTACAGTATATTTGTGGTTACATCTTGGTTTTCTTCTTTCTACGAACTACACTAATAGAAAAGGGATTATTTTAAAATTGGGCCACTAAGATAGATGATACAAAGCACCTTTCAATTGGAGGGCTGAAAATTAAAATTAGATCAT…
151	Chr01	12400985	12172857	C	CCAGTCCACAAGCTATTCTATTTGTTTTAATAATAGATACTCTTT	44	TTTTAATCTAAAGTCCCAAACGATGGTATTATTGCCTTTGTGTTTTAAAAGGACGCGACTGGGGTGCATGGTCGTGCGTTAGGCTAAACACCCGTTCGGACATTCTTAGATTTTCCAATTAGTAATTAGGCTATGATGTGCTACAAAGGCATCTGGATCGTCTACATTACTGCAGATGAGTACGGTTCATACGAGACGGTTCATATGAGAGGGAACAGATCTCCTTCGTTCGCGATAGATCGGACTGTTAAAAATATCCTAAAGTCATAGTGCTGCGCTTCTCTATCTTTAGCAAGTAAAGGCAGAGTAATGGTTTGCTTGGTTGCGCAGACGATAAGCTTATTCATTGGCGCATAACACAAAATATTTCCTTTTCACCCTGGGACAAAAAAAAAAGTG…	TAAAGTCCCAAACGATGGTATTATTGCCTTTGTGTTTTAAAAGGACGCGACTGGGGTGCATGGTCGTGCGTTAGGCTAAACACCCGTTCGGACATTCTTAGATTTTCCAATTAGTAATTAGGCTATGATGTGCTACAAAGGCATCTGGATCGTCTACATTACTGCAGATGAGTACGGTTCATATGAGACGGTTCGTATGAGAGGGAACAGATCTCCTTCGTTCGCGATAGATCGGACTGTTAAAAATATCCTAAAGTCATAGTGCTGCGCTTCTCTATCTTTAGCAAGTAAAGGCAGAGTAATGGTTTGCTTGGTTGCGCAGACGATAAGCTTATTCATTGGCGCATAACACAAAATATTTCCTTTTCACCCTGGGACAAAAAAAAAAGTGCTCCTTTT…
152	Chr01	12436113	12208090	ATATATATATATATATATATATATATATATATATATATATATATA	A	44	TATTTAAGAAAAAATCAAGTAAGTTTAGAGTCAAACATACATGGATCCATAACAAACGGACGTGACTATGACGAGACGGTAGCTGGAAACACTCTCAGGTTGAGTTGCTATTAGTACACCTAACAGTGCTTCTCTTTTTTTTTCTTCTTATAGAGTTTTCTTTTGATTTACTATTCGATTTATAACAAGATTTATATTTTGATAAAAATATTAAATTACTATTATAATGCATCTAAATTACATTTAGATTTCATTAAATTACTTCTTAGATATATAAAAATAAATTTAATAAAGTTTAAAAGTAATTTACTATAGAAGTAACTTGAAAGAAAAAGAAAGTAACTTGTCACGATAATAAGAGTAAATCTACTGTGGAGTAAAACATACATCTATCTAGAA…	TTTTTAAGAATAAATCAAGTAAGTTTAGAGTCAAAGATACATGGATCCATAACAAACGGACGTGACTATGACGAGACGGTAGCTGGAAACACTCTCAGGTTCAGTTGCTATTAGTACACCTAACAGTGCTTCTCTTTTTTTTTCTTCTTATAGAGTTTTCTTTTGATTTACTATTCGATTTATAACAAGATTTATATTTTGATAAAAATATTAAATTACTATTATAATGCATCTAAATTACATTTAGATTTCATTAAATTACTTCTTAGATATATAAAAGTAAATTTAATAAAGTTTAAAAGTAATTTACTATAGAAGTAACTTGAAAGAAAAAGAAAGTAACTTGTCACGATAATAAGAGTAAATCTACTGTGGGGTAAAACATACATCTATCTAGAA…
153	Chr01	12436171	12208104	TTATATATATATATATATATATATATATATATATA	T	34	GACGTGACTATGACGAGACGGTAGCTGGAAACACTCTCAGGTTGAGTTGCTATTAGTACACCTAACAGTGCTTCTCTTTTTTTTTCTTCTTATAGAGTTTTCTTTTGATTTACTATTCGATTTATAACAAGATTTATATTTTGATAAAAATATTAAATTACTATTATAATGCATCTAAATTACATTTAGATTTCATTAAATTACTTCTTAGATATATAAAAATAAATTTAATAAAGTTTAAAAGTAATTTACTATAGAAGTAACTTGAAAGAAAAAGAAAGTAACTTGTCACGATAATAAGAGTAAATCTACTGTGGAGTAAAACATACATCTATCTAGAAATTATATTTAATAAACATATTATAGAACTAACTAATAAAGTAACCAGTTCACTTAATG…	TCAAGTAAGTTTAGAGTCAAAGATACATGGATCCATAACAAACGGACGTGACTATGACGAGACGGTAGCTGGAAACACTCTCAGGTTCAGTTGCTATTAGTACACCTAACAGTGCTTCTCTTTTTTTTTCTTCTTATAGAGTTTTCTTTTGATTTACTATTCGATTTATAACAAGATTTATATTTTGATAAAAATATTAAATTACTATTATAATGCATCTAAATTACATTTAGATTTCATTAAATTACTTCTTAGATATATAAAAGTAAATTTAATAAAGTTTAAAAGTAATTTACTATAGAAGTAACTTGAAAGAAAAAGAAAGTAACTTGTCACGATAATAAGAGTAAATCTACTGTGGGGTAAAACATACATCTATCTAGAAATTATATTTAATAA…
154	Chr01	12442615	12214525	C	CTCTTACTCTCTTCTTTTTTTCTCAAATCACAAT	33	ATAATAAAAATAATATAACTGAGACTCCATATCTAGTAGCTAGTACATTCTACATTTATTATTTCCCAAATATAAAACTTTTACAACATTAAAATGCGAAAAATGAGAGTCCAAATGAAGTACAAATTGACATTGATTAACCTAATTAAATTTGATAAATCCACATACTATGTGCTGGAATTAATATCTCAGTTATACATTCATTGAGTTAGTGTTGGACTGGAAAGTTAGTTGACAACGGTATATGCAAAACTAGAAATAAAATAAAAATATATTCCCTTAAGGTACAACAGCTGGAATAGCTCAGTTGGTTAGAGCGTGTGGCTGTTAACCACAAGGTCGGAGGTTCAAGCCCTTCTTCTAGCGCCTTATTTTTTTTTATTTTCAATTTCTTACTCA…	ATTAAATAAATAATAAAAATAATATAACTGAGACTCCATATCTAGTAGCTAGTACATTCTACATTTATTATTTCCCAACTATAAAACTTTTACAACATTAAAATGCGAAAAATGAGAGTCCAAATGAAGTACAAATTGACATTGATTAACCTAATTAAATTTGATAAATCCACATACTATGTGCTGGAATTAATATCTCAGTTATACATTCATTGAGTTAGTGTTGGACTGGAAAGTTAGTTGACAACGGTATATGCAAAGCTAGAAATAAAATAAAAATATATTCCCTTTAGATACAACAGCTGGAATAGCTCAGTTGGTTAGAGCGTGTGGCTGTTAACCACAAGGTCGGAGGTTCAAGCCCTCCTTCTAGCGCCTTATTTTTTTTATTTTCAATTT…
155	Chr01	12447102	12219078	ATGATTTAAAATCCCATATGAACCCAATGAGTATGATA	A	37	CGATACTGGTATCGACTGTTGGAAGGTAAAAATGCTCATTTGAGAATATACCATCCGGGAGGATGGCACGGCGTAAAGTCCACGACCTCTCACCCTCCGTATCTCATACAGACAGATAACCAATTAACCATACACGCCCATATATACCAGTACCAGATACACAGTGCAGTACTTAAAAATACTAAGCTAGCTATCTGTACAGTAGGCACGAGTGTTTCCGTCATGGCGTCAATTCATTGACAAGGGCAAAAGGAAATGCCCTTTCCGTCACACTCATGGATTGAAGAGCCTTTAGGCCTCGTTTGAAACAAGGAAAAACCATAAAGAATTTTAGTCTGAAATATTTTATGGAGCTATCTGAAATACAGGATTGTTCTCTGCCCTTCCTGTGAAATGAAC…	TACTGGTATCGACTGTTGGAAGGTAAAAATGCTCATTTGAGAATATACCATCCGGGAGGATGGCATGGCGCCGTAAAGTCCACGACCTCTCACCCTCCGTATCTCATACAGACAGATAACCAATTAACCATACACGCCCATATATACCAGTACCAGATACACAGTGCAGTACTTAAAAATACTAAGCTAGCTATCTGTACAGTAGGCACGAGTGTTTCCGTCATGGCGTCAATTCATTGACAAGGGCAAAAGGAAATGCCCTTTCCGTCACACTCATGGATTGAAGAGCCTTTAGGCCTCGTTTGAAACAAGGAAAAACCATAAAGAATTTTAGTCTGAAATATTTTATGGAGCTATCTGAAATACAGGATTGTTCTCTGCCCTTCCTGTGAAATGAAC…
156	Chr01	12522960	12352903	T	TTTTTTTATTTGAGGTTGTCTGGATGTCTGAA	31	CGGATACATGGGATACAGATTTTAGCTCGATTTTTGTTAGTGTGTTTTATGATGCGTTTTCTACCTTTCGACATGATAAAATTAACAACCGATATCTATAACTACTCAATAGTATTGGTTTATTAAAAAAACCGATACCAATAGTCTCATTAAGTCATAGGTGCTGAATTTTATAATAAATCGGCGCTAATAGACATCACATATGTACTGGTTCTTATAATAGCTGGTGGTATCTTCTAGTACGGCCTCATTGGTGCAGTTTTTATTATGGAATGGCACATATAGACATCACAAATGTACCGTTTCTTAATAAAAACGGCACCTGTAAGTGGTAAACCGGTACCTATGATGACATCGCTCCTATACATGTGTTTTCACCTAAATTTTTTCTATCAACTC…	ACGTGATAATCGGATACATGGGATACAAATTTTAGCTCGATTTTCGTTAGTGTGTTTTATGATGCGTTTTCTACCTTTCGACAGGATAAAATTAACAACCGATATCTATAACTACTCAATAGTATTGGTTTATTAAAAAACCCGATACCAATAGTCTTCATACGTGCTGAATTTTATAATAAACCGGCGCTAATAGACATCACATATGTACTGGTTCTTATAATAACCGGTATCTTCTAGTACGGCCTAATTGGTGCAGTTTTTATTATGGAATGGCACATATAGGCATCACAAATATACCGTTTCTTAATAAAAACGGCACCTATGAGTGGTAAACCGGTACATATGATTACATCGCTCCTATACATGTGTTTTTACCTAAAGTTTTCGTATCAAGTC…
157	Chr01	12591896	12428643	TCAAGAACAAATTCTACCTTAATTTCAATTA	T	30	GAGCAGCTTAGGCTCGCCGGCAGAATGGGAGAGTGTACTTGGGGAGATTGGGCTTGCCGATGACTTCATGCCCACGAGGCTACCGATTCGCTTCCCAACCAGATCTAATGGGGGGAGACCGCTGTGGTTGTAGCCTTCTCCCCGCGCGCCGCCGCTGAGGGCAGTCGTTCCCATTGGAGAGAGGCGGCGGGAGGCTCGTCATGCCCTCCGAAAGAGAGGAGGATGGAGGAAGAAGATGAAACTGATGTGTGGGTCCCACGTTTAGGGTTATTTTGGTCCATGTGAAAAATGGAAACTGTGACGGCGATGACATTGATCCAATTTTACAAAATTCCAGTGGCACTCAACTGATATCATGAATAGGGGTGGCATTTTTCTAATATGGTAAATTTGTTATGG…	GAGCAGCTTAGGCTCGCCGGCGGAATGGGAGAGTGTACTTGGGGAGATTGGGCTTGCCGATGACTTCATGCCCACGAGGCTACCGATTCGCTTCCCAACCAGATCTAATGGGGGGAGACCGCTGTGGTCGTAGCCTTCTCCCCGCGCGCCGCCGCTGAGGGCAGTCGTTCCCATTGGAGAGAGGCGGCGGGAGGCTCGTCATGCCCTCCGGAAGAGAGGAGGATGGAGGAAGAAGATGAAACTGATGTGTGGGTCCCACGTTCAGGGTTATTTTGGTCCATGTGAAAAATGGAAACTGTGACGGCGATGACATTGATCCAATTTTACAAAATTCCAGTGGCACTCAACTGATATCACGAATAGGGGTGGCATTTTTCTAATATGGTAAATTTGTTATGG…
158	Chr01	12616540	12451777	ACTCATTTTGGGGACAAAGTAAAATAGATGGTTA	A	33	GGTCCAACATGACGACTCCATCCATCGGTAAGTATATGTGTGTGTTTTCTTTATCCCCATAAACAGTTTTTCCTCAGTAACAAATGCTCGTCGGTTTGAGATATGACTCCAATTAAACTTTATATTTTAAATATTTGGTCCAGACTAGTATGCATCACATCGAATTTTAATTTTACTAGTGAAATGCCCATATTTTGCTATGGATAAAATAATATATAATAATATGGCATAGATAATTATTGTTTTATCAAATATGCTATTATTGTTTGTTTGCTCATTTGAATATATAGTATTTACTTGAAACAAATATTAGATTATTGTATAATATCATAAAATATGATGGACTAATTTAGAAAAATTGCTAAAGTAGTGGTAGAGAGGTTATTATAACCACCACCA…	AGCTGAATCAAATAGGACCATAAGTGATGTGTGTGTTCTTTATCCCCATAAACAGTTTTTCCTCAGTAACAAATGCTCGTCGGTTTGAGATACGACTCCAATTAAACTTTATATTCTAAATATTTGGGCCAGACTATAGTATGCATCACATCGAATTTTAATTTTACTAGTGAAATGCCCATATTTTTCTATGGGTAAAATAATATATAATAATATGGCATAGATAATTATTTTTTTTTATCAAATATGCTAGTATGGTTTGTTTGCTCATTTGGATATATAGTATTTACATGAAACAAATATTAGATTATTGTACAATATCATAAAATATCACGAACTAATTTAGAAAAATTGCTAAAGTAGTGGTAGAGAGGTTATTATAACCACCACCACTAGTTG…
159	Chr01	12648003	12475633	TTATTTATTTATTTTTTTGACTAACAGGTATTTATT	T	35	ATTTTTTCTTGGTTGGTGATCATCATGTAGGTGGTGGGGATCGGCGTGGCGGAGGAAGGGAGGAGGAGCTGCGTCGAATGCCGCGCCACCACCACGCCCATGTGGCGCAGCGGCCCGACCGGCCCCAGGGTGAGTTCTTCATCGATCGATCGATCGATCGCTTCCCTTGGCTTTCCTCTTCGGTTACTGTGTTCATCATCGTTATGATCAGAGTCAGGCAGATTGATTGATTGGGGATTAATTCTGGACTGCCGATCGATTACATGATCATGACGTAGTAGTTGTACTTGTATATACATGCATATTAATTTTTATCTCTGCTCTTGTGGTGCAAATGATTGTTCCGTTTGTTCGTGTCATGCTGTCAATCTGTGCTACATGGTCGATCATCTCATCTAT…	ATTCTTTTTGCTTGGTGATGACGATGTAGGTGGTGGGGATCGGCGTGGCGGAGGAAGGGAGGAGGAGCTGCGTCGAATGCCGCGCCACCACCACGCCCATGTGGCGCAGCGGCCCGACCGGCCCCAGGGTGAGTTCTTGATCGAACGATCGATCGATCGCTTCCCTTGAATTTGCTCTTCGGTTACTGTTCAGCATCGTTATGATCAGGCTCAGGCAGATTGATTGATTGATTGGGGATTAATTCTGGACTGCCGATCGATTACATGATCATGATGTAGTAGTTGTACTTGTATATACATGCATATTAATTTTATCTCTGCTCTTGTGGTGCAAATGATTGTTCCGTTTGTTCGTGTTATGCTGTCAATCTGTGATACATGGTCGATCACCTCATCTAC…
160	Chr01	13054451	12963182	G	GGGCCTTAGCGCCAATGCATTTGGCGCTGACCCCTTGTACATGCTAAAT	48	AAATGTAACGGCCTGTCAATGGCCTTGGCCATGCTATATGAGCTTGTGACTGTTAAGAATCGGCAGCTATAGCATAGATGACACATATGATTGTCTTTGATAAGAGGATGCATGTCCCATAGGTGTTGGTTCTGCTACAGAACCTACACCTATATATGTGGCTGACATATATATTGTTCTCCGTAACCCTATCTCGATAGGGAAGAATAATGAGGAGCTCCGTTCTTGCTCTTTTTATAAATAACTCTTCTTTCTTTTTTATATATAACTACTAGGCAAAGTCTTGGTAGTATTTTGCATTAAAAAAAGGGGAAGGGATGGTTTTGCCTTTTTTTTGACAAATTGGTCATTGTAGAAAATTATTTCAAAACTTGTCCCTACCAAAAACTATATTAAAAA…	TTGTGACTGTTAAGAATCGGCAGCTATAGCATAGATGCTGGTTCCAGAGAAGAACCGACACATATGATTGTCTTTGATAAGAGCATGTATGTCGTCCCATAGGTGTTGGTTCTACTGCAGAACCTACACCTATATATGTGGCTGACATATATATTGTTCCCCGTAACCCTATCTCTATAGGGAAGAATAGTGAGGAGCTTTGCTCCATTTTTCTAAATAACTCTTCTTTCTTTTTTATATATAATTACTGGGCAAAGTCTTGGTAGTATTTTGCATTAAAAAAAAGGGAGCAGATGGTTTTGCCCTTTTTTTTGACAAATTGGTCGTTGTAGAAAACTTATTTCAAAACTAGTCCCTACCAAAAACTATATTCAAAAATAGGCCGTCGTCTCAGCGCCA…
161	Chr01	13184383	13024164	T	TCTAAACACAGTGAAATACTGAAATGTCTAATTTTTCTTCT	40	AGCAGCAACATGATAGACACCTTCTGAGATGAAGGGTGAGGCAAAGCGGGCTGCTAGGCCAGTATATCTTTGAACCATTTCGATAATTTCATCAGCAGATTTGTCATTACTACTGTTTCCTTCAGTTTCATTATCTTCGAGATCAAATGGCTCCGATGGATAGCGTGCAACCCAGACCTCCTGACAGTGGTCAGCGGCATATTCTTCATTATCAGCATCAAGGATCGACGGACGGTTGATGAGGCGTCCAAACCTTGATGCACAGTAAGCAGCATAGCTCTCCTGGGGAACAAGAGAAAACTTGAGATGGCACATTTCATGCGAAAGTTTCATGAGCCACAATCACAGTACAAGTGGTATATCTGAATTTCCAAAATTGTGGGACTTTTTATACAGAAA…	TGATAGACACCTTCTGAGATGAAGGGTGAGGCAAAGCGGGCTGCTAGGCCAGTATATCTTTGAACCATTTCGATAATTTCACTAGCAGATTTGTCATTACTACTGTTTCCTTCAGTTTCATTATCTTCAAGATCAAATGGCTCCGATGGATAGTGTGCAGCCCAGACATCCCGACAGTGGTCAGCGGCATATTCTTCATTATCAGCATCAAGGATCGACGGACGGTTGATGAGGCGTCCAAACCTTGATGCACAGTAAGCAGCATAGCTCTCCTGGGGAACAGGAGAAAACTTGAGATGGCGCATTTCATGTGAAAGTTTCATAAGCCACAATCACAGTATAAGTGATATATATGAATTTCCAAAATTGTGGGACTTTTTGTACAGAAATTATGTACAG…
162	Chr01	13219425	40321718	A	ACCATCATCGTGTCAAGGCTACCGTCATGGCACTGAG	36	TTTTTTTTATCTAAACACATGCAAACCACTAATTACAAATGTGAGCACACAACAATTACATTTAATTATTTAGGCAAGATGCTCATATGCAGCGATATGTTTCCCTCTAATCAGTAGCCCAACAAACTGGCCACTGAACTGATCACGTTAGCCTAACAACCCACCTCTAAAATTGGTTAGTTGCATCATTACGGGGAGTTTTCTCCATTGTTCAAATCTAATTCATCCAGTAGTATGAAAATCATAGGGTTTAATTAGGGTTGCGTACGGCGAGTTTTTTTCATTGTTCAAATCACAAAGAAAATACAAACAGCGTGGTATTATACTACTAAATTTTCAATACTAGCGATTCATATTAGTGGATCAATTGTTTGCTCCATGCTAGCTAGTTTGATTAGT…	TTTTTTTTATCTAAACACATGCAAACCACTAATTACAAATGTGAGCACACAACAATTACATTTAATTATTTAGGCAAGATGCTCATATGCAGCGATATGTTTCCCTCTAATCAGTAGCCCAACAAACTGGCCACTGAACTGATCACGTTAGCCTAACAACCCACCTCTAAAATTGGTTAGTTGCATCATTACGGGGAGTTTTCTCCATTGTTCAAATCTAATTCATCCGGTAGTATGAAAATCATAGGGTTTAATTAGGGTTGCGTACGGCGAGTTTTTTTCATTGTTCAAATCACTAAGAAAATACAAACAACGCGGTATTATACTACTAAATTTTCAATACTAGCGATTCATATTAGTGGATCAATTGTTTGTTCCATGCTAGATAGTTTGATTAGT…
163	Chr01	13251313	13131835	T	TTTTAAGTTATTATATAAAGTTGTATATATTATTT	34	ATTTTGGATCATTGGATGTGTCACATGATGAATGAGTAAAAGCATTTGTTAATCTATAGCGTAGATTTATGCTAAAAATGGCATGATCTCTTATATCGTGAGATGGAGGGTGTACAACTGAAATTCGCAGCTTTCCAATAGCAATTAATGACATACTCCCTCGGTCCAAAAAATATAAGAAACTATGACCGGATGGAATGTTTGCTAGATAGTACAATATATTAGACAAACTCCCTGTCGAGATAATAGATATATTATCTTAGAAAATATCCCATCTAGTTTTAGGTTATTATATTTTAGGACGGATGTAGTACCTAAAATAAGAGAAAACAAAAGAGAATACAAGGGATAAAAAAATATCGCAAGTATTTTTGGGTAAAAAATCTTTCAAATGGCACT…	TTATCTGTTGATTTTGGATCATTGGATGTGTCACATGATGAATGAGTAAAAGCATTTGTTAATCTATAGCGTAGATTTATGCTAAAAATGGCATGATCCCTTATATCGTGAGATGGAGGGTGTACAACTGAAATTCGCAGCTTTCCAATAGCAATTAATGACATACTCCTTCGGTCCAAAAAATATAAGAAACTATGACCGGATGGGATGTTTGCTAGATAGTACAATATATTAGACAAACTCCTTGTCGAGATAATAGATATATTATCTTAGAAAATATCCCATCTAGTTTTAGGTTCTTATATTTTAGGACGGATGTAGTACCTAAAATAAAAGAGAATACAAGGGATAAAAAAATATCGCAAGTATTTTTGGGTAAAAAATCTTTCAAATGGCACT…
164	Chr01	13261943	13142809	TTGGTTCCCAAAATACTCTATCCTATTAGTTTATGGCAC	T	38	GGTGAATTCTCTATCCATTCTACAGATCTCATTATACCTTAAACTTTTTCAACAGTTGAACAGCCAAAGGTTGGTTACATATCAATAGATATTATCACTGATACCCTAGAAGGTAATTGATTCATTTGCACCCTCTATGAACTATGATTGCTTTTCCTATTGAAGGATTGTGTTGAGAGTTTTTCATATATGTTGTCTTAAACAGCTGCAACAAAGCCATCAGTGGCTGCAATTGATGGTCTTGCTCTTGGTGGAGGATTGGAAGTTGCTATGGTACTTGTTTGTTTTATCCTGGTTATTATCTTTGATATTTCAGAGGCAATAACTTCTTTGGTAATCCTTGTATGTTCAATTAGGCATGCCATGCACGCATTTCAACTCCCACAGCTCAATTAGGAC…	GGTGAATTCTCTATCCATTCTACAGATCTCATTATACCTTAAACTTTTTCAACAGTTGAACAGCCAAAGGTTGGTTACATATCAATAGATATTATCACTGATACCCTAGAAGGTAATTGATTCATTTGCATCCTCTATGAACTATGATTGCTTTTCCTATTGAAGGATTGTGTTGAGAGTTTTTCATATATGTTGTCTTAAACAGCTGCAACAAAGCCATCAGTGGCTGCAATTGATGGTCTTGCTCTTGGTGGAGGATTAGAAGTTGCTATGGTACTTGTTTGTTTTATCCTGGTCATTATCTTTGATATTTCAGAGGCAATAACTTCTTTGGTAATCCTTGTATGTTCAATTAGGCATGCCATGCACGCATTTCAACTCCCACAGCTCAATTAGGAC…
165	Chr01	13312430	13185184	A	ATAGGAAAAATTTGCTACAGGATATGCAGAATTTTT	35	ATTAAACAACTTAGGTTAGACAACAGGTTGGATTAAATATAATTCGTGCGGATGCATCCAAAGCATTCAGCTCGAAAAGGATGGTACGTCTTCCAGCCTACAATTAGATAAAATGCACGGTCAAACATATAATAGTCTCCTACCAAAGCCATGTTTGGTTGAGCATATTAATTTTTAATTTCCTTTTTGTCTTGCAATAATTTTTTTATTTCATTGTTTAAGCAGTGCCTGTCTTCACATTTTTCATTTTTAACTAACTCAGCATGTAGCTCTGACTACCAAGTTGTACGATGATCCAAACAATATAAAGTCAGTACAATAATCACAACCTGCATTTCAAGGCTAACTTTGTCTCCAAATTACTGCTTCTCAAATTTTCAACAACCTTTTGAAGGTCCA…	ACAACTTAGGTTAGACAACAGGTTGGATTAAATATAATTCGTGCGGATGCATCCAAAGCATTCAGCTCGAAAAGGATGGTACGTCTTCCAGCCTACAATTAGATAAAATGCACAGTCAAACATGTAATAGTCTCCTACCTAATTGGGTGCCATGTTTGGTTGAGCATATTAATTTTTAATTTCCTTTTTGTCTTGCAATAATTTTTTTATTTCATTGTTTAAGCAGTGCCTGCCTTCACATTTTTCATTTTTAACTAACTCAGCATCAGCTCTGACTACCAAGTTGTACGATGATCCAAACAATATAAAGTCAGTACAATAATCACAACCTGCATTTCAAGGCTAACTTTGTCTCCAAATTACTGCTTCTCAAATTTTCAACAACCTTTTGAAGGTCCA…
166	Chr01	13377537	13306911	A	ATCGGGTAATTTTCAGGGGTACACAGGAAATTTACTCAAATTT	42	AAATATAAAAGCGTCTCGCATGAGACTATTATAGTTATGAGTTTGTTGTTCGATGCATTATTTATCCCAAAAAATATTGTTAGATAATGAAATAAAAAAATACATATTTATTTTTTAAAAAAAAGTCATAAAAATGAGGAGCATTCATATAAAAATAGAACTACCAATGTTCACAACATTCTTTTAATGAATGCTCCCGATAAAAAAAATCCATTGTCCTATTAAAATTTCAAATAAAAATTTTAATTTATTACATTTATTTTATTTTCAAAATTTATGTCAAAATTTTCTGCACTAATTATTTAGTCTCTTTAGTTTTATAAAATGCACATACTGTACACTCAAACAAAATTTTTAATTGTTTTTCAAGCTTATATTTGAACCTAAAGCATCAAGGGC…	AAAATATAAAAGCTTCTCGCATGAGACTATTATAGTTATGAGTTTGTTGTTCGATGCATTATTTATCCCAAAAAATATTGTTAGATAATGAAATAAAAAATACATATTTATTTTTTTAAAAAAAGTCATAAAAATGAGGAGCATTCATATAAAAATAGAACTACCAATGTTCACAACATTCTTTTAATGAATGCTCCCGATAAAAAAAATCCATTGTCCTATTAAAATTTCAAATAAAAATTTTAATTTATTACATTTATTTTATTTTCAAAATTTATGTCAAAATTTTCTGCACTAATTATTTAGTCTCTTTAGTTTTATAAAATGCACATACTGTACACTCAAACAAAATTTTTAATTGTTTTTCAAGCTTATATTTGAACCTAAAGCATCAAGGGC…
167	Chr01	13401457	13332817	CCGCCTGTTAGCCAACGATTATGAAGATCACCGATCTTTGCAGGCGGGCGGCCG	C	53	TATAGAAGTATGCTGGAACCAATAAAACAGAAGTCTACTTGATTGTGACATTTGCATTCACGACCACAGGTTAGTGGCTTGTGTTGTTACGACGAGGTTTATGCTTATCAGCCAAAATTTAAATTTTTAACTTTAAATTTGAAGATAATTTTAAAGTTTTTTATCGAAGTTTAAGTTTCAGTATTTGCTTTTAAATCGCTAAGATCACGTATATAAAAGGTTAGTTCGTCGTTGCAGTTTGCTTTCCTGTGCTTACTGGAATGGCTTAGTTGGCGCTCAATGTTGAGGAAGTCCGCGGCACATCTCGCCACGGTAGCGCCCGAGATCGGTTGGCTTCGCCACGGCGCGCGTACGTGCATGGCAACGGATCGAGTTGGCGGTGCTCGCATGCTCCGTCTA…	ATAGAAGTATGCTGGAACCAATAAAACAGAAGTCTACTTGATTGTGACATTTGCATTCACGACCACGGGTTAGTGGCTTGTGTTGTTACGACGGGGTTTATGCTTATCAGCCAAAATTTAAATTTTTAACTTTAAATTTGAAGATAATTTTAAAGTTTTTTTATCGAAGTTTAACTTTCAGTATTTGCTTTTAAATCGCTAAGATGACTTATATAAAAGGTTAGTTCGTCGTTGCAGTTTGCTTTCCTGTGCTTACTGGAATGGCTTAGTTGGCGCTCAATGTTGAGGAAGTCCGCGGCACATCTCGCCACGGTGGCGCCCGAGATCGGTTGGCTTCGCCACGGCGCGCGTACGTGCATGGCAACGGATCGAGTTGGCGGTGCTCGCATGCTCCGTCTA…
168	Chr01	13428624	13359236	A	ATCTATTTTTTTAAAAAATAGCTAATTCTTAATTAA	35	ACGCAGTGGTATTGCACGTTTCCCGTGTACTGAGACCTAGTGGTCTTCAATCTCATTCCTAGCGTATGTTAAGGACGCGCTACGTGTGTTGTGGTGTGAGTGTGGTGTATGTGAGTGTGCGTTCTGACTTGTACCCTTCTAAAAAAGTAAAGTATATGTCAACCATTCATTTTATTAAAAATATATATAAATATGCTCAAATATATTCGTGCTTAAATCCTTTTAGTGATAAAACAAATAAAAAACCATATAATTATTTAATTTTTAAAATAAGATGAATGGAAAAAAAATCAAATGGTGTCAAACTTAGAAAGCGGAGGAAAGTATATATGACACGACATTCCAAAACTAAGTTTTTGTCGGGAGGACGTTCGGGCTGTTTTCTTTAGCTGGGGTTCC…	AAATAGGGTACGCGCACGCAGTGGTATTGCACGTTTCCCGTGTACTGAGACCTAGTGGTCTTCAATCTCATTCCTAGCGTATGTTAAGGACGCGCTACGTGTGTTGTGGTGTGAGTGTGCGTTCTGACTTGTACCCTTCTAGAAAAGTAAAGTATATGTCAACCATTCATTTTATTAAAAATATATATAAATATGCTCAAATATATTCGTGCTTAAATCCTTTTAGTGATAAAACAAATAAAAAACCATATAATTATTTAATTTTTAAAATAAGATGAATGGAAAAAAAATCAAATGGTGTCAAACTTAGAAAGCGGAGGAAAGTATATATGACAAGACATTCCAAAACTAAGTTTTTGTCGGGAGGACGTTCGGGCTGTTTTCTTTAGCTGGGGTTCC…
169	Chr01	13450004	13380669	T	TATATATATATATATATATATATATATATATATATATATATATACACACACACAC	54	AATAGTGGGAAACATCCAATAATTGGATATGTTTGGAGTGGCATTAGTACTACTAGTACAACCTTTAGAGTGGAAATCTCAGAGTGTCGTCATTCTTAGCCCTATTTAGAAGATTAGCCAGGGTTAATTTTGAGAGCTAATGTTTAGTCATGAATTGGTACGCTAAACATTAGTCTAGGGTGATATGTTTAGATCCATGGACTAATTTAGAGCTAAAAGATGGAGATATGGCTGTTTTTTTATGGTTCCCACATAAAATTAGCCCTATTAGCATTACTTGGAGGGGCTAATGTTACGAGGAGGGCTAATTCATTTTAGTCTCAAATTAGACCACCTGTTTAGATCATTGGGGCTAATTTAGGGCTAAAAGGTGGGGGCTAATAATTAGCCCAAAGAACC…	TAATTGGATATGTTTGGAATGGCATTAGTACTACTAGTACAACCTTTACAGTGGAAATCTCAGAGTGTCGTCATTCTTAGCCCTATTTAGAAGATTAGCCAGGGTTAATTTTGAGAGCTAATGTTTAGTCATGAATTGATACGCTAAACATTAGTTTAGGGTGATATGTTTAGATCCATGGACTAATTTAGGGCTAAAAGATGGAGAAAGAGTAGTGAGAAGGAGATATGGCTGTTTTTTTATGGTTCCCACATAAAATTAGCCCTATTAGCATTACTTGGAGGGGCTAATGTTATGAGGAGGGCTAATTCATTTTAGTCTCAAATTAGACCACCTGTTTAGATTATTGGGGCTAATTTAGGGCTAAAAGGTGGGGGCTAATAATTAGCCCAAAGAACC…
170	Chr01	13454144	13399251	G	GTTTACAAGAGCCACGGGCTTATAGATTTGT	30	AGACTTGATAAATTCTGCTAAAGCTCTACAATATCTCAAATATTCCCAACTCAGGATAAGTATTTCATCTTAAGCAATGATACACACAGAAGAAAATACAACTTAAGACAAAAAAAGTAAGCGTTCTCGAAATTGGGAGTTAGTTCACTTCGATACATTTCAGATAGCTTTCCGTCTATTTTGCATCCTTTCGTTAAATAAAAGGAACTTACCCTTCATCAACCTGTAATTGGAAAATGTTTTCCTATGTCAAATAAAGCAGAATGCTTTCCTAAAAACTAATAAAATAAAGTGTAATGGTTAATTATCCTGTTTACAAATACCATCCTGTACGAATGCCTTGGCTGCGGCTGCGTCGCAATTGCTAAAAACCAAGCAGAGACACAAGGTAGCTGCGGG…	AGACTTGGCAAATTCTGCTAAAGCTCTATAATATCTCAAATATTCCCAACTCAGGATAAGTATTTCATCTTAAGCAATGATACACACAGAATAAAATACAACTTAAGAGAAATAAAGTAAGCGTTCTCGAAATTGGGAGTTAGTTCACTTTGATACATTTCAGATAGCTTTCCGTCTATTTTGCATCCTTTCGTTAAATAAAAGGAACTTACCCTTCATCAACCTGTAATTGGAAAATGTTTTCCTATGTCAAATAAAGCATAATGCTTTCCTAAAAACTAATAAAATAAAGTGTAATGGTTAATTATCCTGTTTACAAATACCATCCTGTACGAATGCCTTGGCTGCGGCTGCGTCGCAATTGCTAAAAACCAAGCAGAGACACAAGGTAGCTGCGGG…
171	Chr01	13454180	13399318	G	GGATTCGACTCCTCATGTGAGCGAATTTTTAGTGGTAGGT	39	CAAATATTCCCAACTCAGGATAAGTATTTCATCTTAAGCAATGATACACACAGAAGAAAATACAACTTAAGACAAAAAAAGTAAGCGTTCTCGAAATTGGGAGTTAGTTCACTTCGATACATTTCAGATAGCTTTCCGTCTATTTTGCATCCTTTCGTTAAATAAAAGGAACTTACCCTTCATCAACCTGTAATTGGAAAATGTTTTCCTATGTCAAATAAAGCAGAATGCTTTCCTAAAAACTAATAAAATAAAGTGTAATGGTTAATTATCCTGTTTACAAATACCATCCTGTACGAATGCCTTGGCTGCGGCTGCGTCGCAATTGCTAAAAACCAAGCAGAGACACAAGGTAGCTGCGGGGTGCAGTAGCCACAACGCAGGACCCGCTATGGAACA…	TCTTAAGCAATGATACACACAGAATAAAATACAACTTAAGAGAAATAAAGTAAGCGTTCTCGAAATTGGGAGTTAGTTCACTTTGATACATTTCAGATAGCTTTCCGTCTATTTTGCATCCTTTCGTTAAATAAAAGGAACTTACCCTTCATCAACCTGTAATTGGAAAATGTTTTCCTATGTCAAATAAAGCATAATGCTTTCCTAAAAACTAATAAAATAAAGTGTAATGGTTAATTATCCTGTTTACAAATACCATCCTGTACGAATGCCTTGGCTGCGGCTGCGTCGCAATTGCTAAAAACCAAGCAGAGACACAAGGTAGCTGCGGGGTGCAGTAGCCACAACGCAGGACCCGCTATGGAACAACCCCATATGTGAAAGCACCTAATCAATACT…
172	Chr01	13497841	13443485	ATGTGAATAGACCCATCTTGTTGGAATTCTG	A	30	CCTTCCGCCGGCGGCAATACTCTCCGGCGCCCCCTCTTGTTCAGTTCCCCTTCTCTGCCGGCGTCTACCCGCTTCCCCGCCGCAGGAGCTTCTGGTGCCACCCTGAAGACTTCCGGCGTGCGCACAGGGGCAGCGGTGCAGAGGAGCCCCGCGTGGTCCCACCTCCTCTCGCACGACACCGCCGGCGGCGGCGGCAGCCGCGACGACGACTACAGGCGTGTGTGGAGCCGGCTGTTGAGGAGGCTGGTGCAGGAGAGCATGAGCTTCTGTAGCCTCAGCATCAGCAGGCACGGTAATGTTAATTTTCGTGGATGACTTCACCAGAATCAAGAATCTGATTCTGAATCTGAATCAAAAATTTAATTTGGAGATGGACAGTATGCTCTATTGCTATACCAG…	CCTTCCGCCGGCGGCAATACTCTCCGGCGCCCCCTCTTGTTCAGTTCCCCTTCTCTGCCGGCGTCTACCCGCTTCCCCGCCGTAGGAGCTTCTGGTGCCACCCTGAAGACTTCCGGCGTGCGCACAGGGGCGGCGGTGTAGAGGAGCCCCGCATGGTTCCACCTCCTCTCGCACGACACCGCCGGCGGCGGCGGCAGCCGTGACGACGGCTACAGGCGTGCGTGGAGCCGGCTGTTGAGGAGGCTGGTGCAGGAGAGCATGAGCTTCTGTAGCCTCAGCATCAGCAGGCACGGTAATGTTAATTTTCGTGGATGACTTCACCAGAATCAAGAATCTGATTCTGAATCTGAATCAAGAATTTAATTTGGAGATGGACAGTATGCTCTATTGCTATACCAG…
173	Chr01	13624215	13610126	T	TGCAGCCACCTTTTTGTGCTTTTATCAATGGCACCTTCCA	39	AAATCATACTGTTTATTGATTAATTTAACAAGGTAGAAACTCAAATTGTTTTCCGTTGCAACGCACGGGCTCTAGGCTAGTAATGATAAAATATTGAAGATGGGCCATACACCATCTATGTCATTTATCAGAGATATACAGGTTCAAGATTCATGCATGGCCCTTCATAATGTAATCCTGATGTACATAGGTACATATACAGGCCAATTGTTTCTGGAATCTTAAACAAATTTGGTCTAAAAGAACATATGCTTCGAAAAAAATTTCTGATTTTTATTATTCTCAGTTACACTGATTCAGGAATGTAGATATGAGTATATGGCATGGTACTGCATGGAAGTTGTGATTTTATTTGCCAAGATATATACTTGAAAATATACAAAGTTAGTTTGGAGGGTA…	GTTTCTGCAGCTTTCATAATTATAATGTCTTATTATAGTTTTTGTATCAGTTAACTTCTACACAAATAACTTCTCACTAATAATGATAAAATATTGAAGATGGGCCATACACCATCTATGTCATTTATCAGAGATGTACAGGTTCAAGATTCATGCATGGTCCTTCATAATGTAATCCTGATGTACATAGGTACATATACAGGCCAATTGTTTCTGGAATCTTAAACAAATTTGGTCTAAAAAGAACATATGCTTCGAAAAAATTTCTGATTTTTATTATTCTCAGTTACACTGATTCAAGAATGTAGATATGAGTATATGGCATGGTACTACATGGAAGTTGTGATTTTATTTGCCAAGATATATACTTGAAAATATACAAAGTTAGTTTGGAGGGTA…
174	Chr01	13636296	13622913	A	AACGAGCACTTCGCCCTTGCTTTTAATTACCCCG	33	TGATGTTTCAGGAGCTGCAATAATTGTTGGTTCCTGTGGATACTCAACATCTGACTGCCCAATTGTAAGATCGCTTACTTAGTTTTCTTTTTTCTTCAGCAGGTTTTCTTAGTTTATCTAGAAAAGGAGTACAAATGATGCTAGCTGGCCAGAAATATAAACCATATGGGAATTATAGTTATATGTTGATTCCATGTCAGTTTTCTTGATAATCAGGTTCCGAGGGTGCCTTTGTAGGTGGTGATTAGTAGGGTTCTTATGTACAATGAGTTTAAACTGAAGTCATTAAATCTATCTTATTTTCAAACTTATAGGCATTCGAGTGTCTAGGCACCCTGCATTGTATGCATGGCATAAACTTGTGAAAAAAACACCGATGACTTTTAAGGCATTAAAATG…	TGATGTTTCAGGAGCTGCAATAATTGTTGGTTCCTGTGGATACTCAACATCTGACTGCCCAATTGTAAGATCGCTTACTTAGTTTTCTTTTTTCTTCAGCAGGTTTTCTTAGTTTATCTAGAAAAGGAGTACAAATGATGCTAGCTGGCCAGAAATATAAACCATATGGGAATTATAGTTATATGTTGATTCCATGTCAGTTTTCTTGATAATCAGGTTCCGAGGGTGCCTTTGTAGGTGGTGATTAGTAGGGTTCTTATGTACAATGAGTTTAAACTGAAGTCATTAAATCTATCTTATTTTCAAACTTATAGGCATTCGAGTGTCTAGGCACCCTGCATTGTATGCATGGCATAAACTTGTGAAAAAAACACCGATGACTTTTAAGGCATTAAAATG…
175	Chr01	13690774	13670913	CAGTCCATAATAATAATAATAATAATAATAATAATAATAATAATAATA	C	47	AGTCGAGACGGCCGAGAGAGACCATGGCCTGGGAGACCTGGATGATGGACTGGGGGAAGTTGCGCATGGGCTCCTGGAGGATCTTGAAGAAGGAGGTGGCGGTGAAGACGAGGCCGGCGTCGAGGCGGACACCGAGGAGGACGGAGGTGGCGAAGACGAGAGCGGCGATGGCGATAGGGGCGCTCCAGAGCGCGATGATGTTGCCCGAGATGGAGTACATGAAGCGGGTGAGCCACCCGAACTCGCCGCGCCGGAACGCCTCGATGCGGGCGCTGAAGTGCTCTTCCCACGCCTGGAACTTGATCACCCGCATGTAGTTGAGCATCTCGTTCGTCGCCTTCATCCGCTTGTCTCGCTCCGTCATCAGCCGGAACTGGTACCGGTTGTTCCGCCGCGCCC…	AGTCGAGACGGCCGAGAGAGACCATGGCCTGGGAGACCTGGATGATGGACTGGGGGAAGTTGCGCATGGGCTCCTGGAGGATCTTGAAGAAGGAGGTGGCGGTGAAGACGAGGCCGGCGTCGAGGCGGACACCGAGGAGGACGGAGGTGGCGAAGACGAGAGCGGCGATGGCGATAGGGGCGCTCCAGAGCGCGATGATGTTGCCCGAGATGGAGTACATGAAGCGGGTGAGCCACCCGAACTCGCCGCGCCGGAACGCCTCGATGCGGGCGCTGAAGTGCTCTTCCCACGCCTGGAACTTGATCACCCGCATGTAGTTGAGCATCTCGTTCGTCGCCTTCATCCGCTTGTCTCGCTCCGTCATCAGCCGGAACTGGTACCGGTTGTTCCGCCGCGCCC…
176	Chr01	13754279	13718593	ACAGTACAATGAGTATAATAAGGTACCAAATTTTTCACTAAAT	A	42	ATTTTATTCAGTTGCTATCCGCAAGCCACTCCGCAATCCTGCAAATTCTTCACGACTGGATTCGCGGCAACTGAACGTGCGGCCTAGATCAAGAGTGCTTCAAGGAAGTGCTTGCACAAGCAAACTCAATTGTGCTTCAATCTTGATATGTCTTGAACTACCTGAAGCGATCTGCAGGTGTCCTTGGGACTTTGGAAGCAGAAATGGTGGAATTTTTTTTCCGCTGTCAAGTTGTTCGTGATGGAGCTGAAGAAATTCTTGACAAGAACTGAAAGATAAAACAAAGAAGCATATGCAGAACAGGTAGATGATGTCTTAATTATTGCTTTTTTATTCATTTAGATGATGTAGGCCATTACCAAGGTTGCAGCCATATGTATCCTTATTTCCTGGTGCGCT…	ATTTTATTCAGTTGCTATCCGCAAGCCACTCCGCAATCCTGCAAATTCTTCACGACTGGATTCGCGGCAACTGAACGTGCGGCCTAGATCAAGAGTGCTTCAAGGAAGTGCTTGCACAAGCAAACTCAATTGTGCTTCAATCTTGATATGTCTTGAACTACCTGAAGCGATCTGCAGGTGTCCTTGGGACTTTGGAAGCAGAAATGGTGGAATTTTTTTTCCGCTGTCAAGTTGTTCGTGATGGAGCTGAAGAAATTCTTGACAAGAACTGAAAGATAAAACAAAGAAGCATATGCAGAACAGGTAGATGATGTCTTAATTATTGCTTTTTTATTCATTTAGATGATGTAGGCCATTACCAAGGTTGCAGCCGTATGTATCCTTATTTCCTGGTGCGCT…
177	Chr01	13794841	13759977	ATATATATATATATATATATATATATATATATATATATA	A	38	ATAAAACTGCATCATCATTCAATTTGTTCCTTTGTTAGTAGGTGTTGTTTTCACTTATCTTGCCAGGTGAGGTTACTCCAACAGGCAAGTCAATCCAAGCAAGAATATTCAGCAACCAGCAAATATGTTATGTATGTATACGAAGGTTGATAGATACTAATCAACTTGAGAATCCACATTATACATAATAGCAACAGCAACCTCACAGATGAGCACCAATACCACCACCAGTTGGATCAGCAGATGGGAGCAGATGAGCGGAAGTGGAAGAGGATCGAGCCGAGCCTATTGTACCTTCGAGAATTTAGGCAAACTCGGTTCAAGCCCGAGCTCAGCTATAAGTAGTATAATATATATTTTAATGATAATCTCTTGATAAGTATAATTACTTTTTTAAGT…	TCCTTTGTTAGTAGGTGTTGTTTTCACTTATCTTGCCAGGTGAGGTTACTCCAACAGGCAAGTCAATCCAAGCAAGAATATTCAGCAACCAGCAAATATGTTATGTATGTATACGAAGGTTGATAGATACTAATCAACTTGAGAATCCACATTATACTAATCAACTTGAGAATCCACATTATACATAATAGCAACAGCAACCTCACAGATGAGCACCAATACCACCACCAGTTGGATCAGCAGATGGGAGCAGATGAGCGGAAGTGGAAGAGGATCGAGCCGAGCCTATTGTACCTTCGAGAATTTAGGCAAGCTCGGTTCAAGCTCGAGCTCAGCTATAAGTAGTATAATATATATTTTAATGATAGTCTCTTGATAAGTATAATTATTTTTTTAAGT…
178	Chr01	13815316	13780409	TATCAATATACTCCCTCTGTTCTTATAGGCTT	T	31	GATTAGAAATTCTGAATCATCCTGCTGCAAACTGATCGATGAACTGAAGATAAATTCTGCAAAACTCTTTCAGTTCTACGACCATTTCTTCGACTGGGGTCTCAAGGATGAGATCGAGCGCCTCGTGTCAATCAGAAACCGGCAGGGGATCCACCCGGCGTGGGGGCGCTGTTGCTGGCTCTTGCCGAGTTGAAAAGGGCAGATGCTGCCAGAGATGGAAGCCACGAGAGGGAAATTTACGAATGTGCCCATGGCCCGGCGTATTTAGGGCCAGCTTGTTTACTCAGTAAAAGAAAAGTATCACCGATCACAACATATCGTTTAGAAAGTGTGTGAGTTAGGCATGGGCGAACCACATCCTTTACGACTAGGTCTCTCGATCTGCTAGACGAGAGATCA…	ATCATCCTGCTGCAAACTGATCGATGAACTGAAGATAAATTCTGCAAAACTCTTTCAGTTCTACGACCATTTCTTCGACTGGGGTCTCAAGGATGAGATCGAGTGCCTCGTGTCAATCAGAAACCGGCAGGGGATCCACCCGGCGCAGGGGCGCTGTTGCTGGCTCTTGCCGAGTTGAAAAGGGCAGATGCTGCCAGAGATGGAAGCCACGAGAGGGAAATTTACGAATGTGCCCATGGCCCGGCGTATTTAGGGCCAGCTTGTTTACTCTAGTAAAAGAAAAGTATCACCGATCACGACATATCGTTTAGAAAGTGTGTGAGTTAGGCATGGGCGAACCACATCCTTTACGACTAGGCCTCTCGATCTAGGTCTCTCGATCTGCTAGACGAGAGATCA…
179	Chr01	13824694	13811001	T	TTGGATGTGAACCTTGCAAAACTATACTTATTTTA	34	CATACGACAGTTGGATAACCGATAGATCTAGCAAGAAAGAGCCCGGATATAGCGCCTTCGCTCTTCGTCGGGTCAGCTCCTGCCTTCCAAAGTCCCTGCAAGCCCGACATCTCCGACCTCAATGGCAACGATAACAATAGTGCTCATCACGATAGGGGAGGAGAAAAAGACTTGTCGGTTACTAGAGGTTAAGGCTGCGCATGTAAAGGCAAAGGAGAGGAACGACGGTGATTCATGGAGAAAGAGCAGTGATGGCGGTGCGTAGAGTGGTAGTTAGCGGTTGCTGGTGGTATGAGGAATTTGTTGTCGACACAATCGTTTAATTTTTTCCTAAGTATTGATGATACATGGGTCACCAGTTATATAAACAAATAACACTAGCTAGTTTTAAAATACTAC…	CATACGACAGTTGGATAACCGATAGATCTAGCAAGAAAGAGCCGGGATATAGCGCCTTCGCTCTTCGTCGGGTCAGCTCCTACCTTCCAAAGTCCCTGCAAGCCCGACATCTCCAACCTCAATGGCAACGATAACAATAGTGTGCATCACGATAGGGGAGGAGAAAAAGACTTGTCGGTTACTAGAGGTTAAGGCTGCGCATGTAAAGGCAAAGGAGAGGAACGATGGTGATACATGGAGAAAGAGCAGTGATGGCGGTGCGTAGAGTGGCAGTTAGCAGTTGCTGGTGGTATGAGGAATTTGTTGTCGACACAATCGTTTAATTTTTTTCTAAGTATTAATGATACATGAGTCACCAGTTATATAAAGAAATAACACTAATTAGTTTTAAAATACTAC…
180	Chr01	13837891	13824254	T	TGCCATTCATGGGGGGGTTATTAATGCCGCCGATC	34	CAACCTCCACTTATGAGATGCCCTTGTTGAATTTGCAGCTTGATGGTAGTTAACCTTGTCCTTGCTGTCACACGAGTTCATCGTCGGACGAGAGATCATCAGTGCTCCTCTCGACTACGCGAACTCGCTTTCCTTTTTTGAGGGCCACCTGCTTGTTTTTATGACCTAGCACTCCCCCAATGTATGTGTGCTGGTATTGTGTATTGGGCACCATTGTAGTACTGGTTTGTCGCCTTGAAGAGCTGGGCGCTTTGGGGGTGGGTTCGCTTGTTCTGCAACAAAGACCTCTATCTACGCCTTACGCTTTCCTTTCTTTTTGCGATTTTGTTTCTTTTTCTTGCTAGACTCCAGTGCGTCCTTCTTGGCCGACGACTGTTTCTGCTCGGCCACCTTGCCCTT…	TATGAGATGCCCTTGTTGAATTTGCAGCTTGATGGTAGTTAACCTTGTCCTTGCTGTCACACGAGTTCATCGTCGGACGAGAGATCATCAGTGCTCCTCTCGACTACGCGAACTCGCTTTCCTTTTTTGAGGGCCACCTGTTTCGCCAAAGCTTGTTTTTATGACCTAGCACTCCCCCAATGTATGTGTGCTGGTATTGTGTATTGGGCACCATTGTAGTACTGGTTTGTCGCCTTGAAGAGCTGGGCGCTTTGGGGGTGGGTTCGCTTGTTCTGCAACAAAGACCTCTATCTACGCCTTACGCTTTCTTTTCTTTTTGCGATTTTGTTTCTTTTTCTTGCTAGACTCCAGTGCGTCCTTCTTGGCCGACGACTGTTTCTGCTCGGCCACCTTGCCCTT…
181	Chr01	13914802	13887326	T	TCTATTTTATCGGCTATGCTGTGAATGCTTATA	32	GTTATCATATACCCTATATAATCTCTGACAATATCGTTATTTAACCTTCAATCGGCTAACATCCGTCATTGGAAGGCAGCCGATCAGGTTAAATACCAATGTTGACGTAGATTATATAGGGTATCCACCACTCCATGAAACAGCCAGTGGCTTGATTGTCTAGATATTGTCCTTCTTTTCATACTTATAGCTGCATCAGTTGAGTTTGATCTTATAAGTCGTGATTAGAATCTCAGTCTTTAGCCTGCCTTTTGGTTGTCGATTAGAGTAGTATCGGGGTTTCAGCCGATCTTACCTGATTTAACTCCTTCATATATTATGTGCTTGACCGATATGTTAAATTTGCCCATTATGTTAAGATCTTGTCGTATTTACATATATTAAGCTTTTTGTTTGATA…	GTTATCATATACCCTATATAATCTCTGACAATATCGTTATTTAACCTTCAATCAGCTAACATCCGTCATTGGAAGGTAGCCGATCAGGTTAAATACCAATGTTGACGTAGATTATATAGGGTATCCACCACTCCATGAAACAGCCAGTGGCTTGATTGTCTAGATATTGTCCTTCTTTTCATACTTATAGCTGCATCAGTTGAGTTTGATCTTATAAGTCGTGATTAGAATCTCAGTCTTTAGCCTGCCTTTTGGTTGTCGATTAGAGTAGTATCGGGGTTTCAGCCGATCTTACCTGATTTAACTCCTACATATATTATGTGCTTGACCGATATGTTAAATTTGCCCATTATGTTAAGATCTTGTCGTATTTACATATATTAAGCTTTTTGTTTGATA…
182	Chr01	14024054	13999818	AAGTGCTCTAGTACTAGGACTCTGGATAAAGAAGA	A	34	GATGTGGGGCCCAGGGTTCGGCCGAACCAGGTGGTTCGGCCGAACCACCACAAGCTCCTTTCATCCCAGCCTTCCACGTGTATGCTTCTGATACATTCCCAATGACGGTTGAGGGTGTTTTGGTCGTTTCCCATACCTGTAACCGTCATATGGAGGCTATAAATAGAGCTCCTCTCCCTCACTTCACTCACACGCAACTTTGAGCTGAATTACAAGAGGCTCTATTGTATCTTTTATACATTAGAAATAGGTAGAGAGTGAGGGGAAGCTCTCGAGGAGTGTTCGGAAGTTTGGCGCTCATCCGACTTCTACCTCGACGAGTGTAGCTTCCTAGGAGGAATTCTGGAGGAGTACCGGAGCTGTCGGTACACTCTGCTCCGGGTTCGGAGAACTTCTTCT…	GATGTGGGGCCCAGGGTTCGGCCGAACCAGGTGGTTCGGCCGAACCACCACAAGCTCCTTTCATCCCAGCCTTCCACGTGTATGCTTCTGATACATCCCCAATGACGGTTGAGGGTGTTTTGGTCGTTTCCCATACCTGTAACTGTCATATGGAGGCTATAAATAGAGCTCCTCCCCCTCACTTCACTCACACGCAACTTTGAGCTGAATTACAAGAGGCTCTATTGTATCTTTTATACATTAGAAATAGGTAGAGAGTGAGGGGAAGCTCTCAAGGAGTGTCCGGAAGTTTGGCGCTCATCTGACTTCTACCTCGACGAGTGTAGCTTCCTAGGAGGAATTCTGGAGGAGTACCGGAGCTGTCGGTACACTCTGCTCCGGGTTCGGAGAACTTCTTCT…
183	Chr01	14027054	14002774	TCAATAAAAAGATTCTGCACTTGATATGAAGGCATAACACA	T	40	TAATAGGCAATTTTGATACACACCATGAACAAAAAATTCAGCCACCAATGAAACAGTACAATAGGCTTGATATGGATGCAAAAGCACAAGAGACAAGTTAAAGCTATGCACCTGAGCATACAACTAGCTTAGGGAGGACTGATCTGACCCTGTCCAAATGCCATCATTTGTCGAAGGAGACCCTGATGATGAAGTGAGGGCTTCCCGGGCATGCATATCCTCCTAGCAATCAAAGCAAGGTTTCAGTTTTGCATTATTATATAAATAAAGGTTCATTGCATAAGTTACTTAATAAAAGAAGGAAAGAAGATGTAATAGTTCAGTACTTACTATAGCTTTCTTCACAGGTTCACTAAAACCTTTAGTTTTGCTGCAATGCAACTCATTAAAGAGATCAAT…	ATAGGCAGAGTAATAGGCAATTTTGATACACACCATGAACAAAAAATTCAGCCACCAATGAAACAGTACAATAGGCTTGATATGGATGCAAAAGCACAAGAGACAAGTTAAAGCTATGCACCTGAGCATACAACTAGCTTAGGGAGGACTGATCTGACCCTGTCCAAATGCCATCATTTGTCGAAGGAGGCCCTGATGATGAAGTGAGGGCTTCCCAGGCATGCATATCCTCCTAGCAATCAAAGCAAGGTTTCAGTTTTGCATTATTATATAAATAAAGGTTCATTGCATAAGGTACTTAATAAAAGAAGCAAAGAAGATGTAATAGTTCAGTACTTACTATAGCTTTCTTCACAGGTTCACTAAAACCTTTAGTTTTGCTGCAATGCAACTCATTAA…
184	Chr01	14028416	14004095	A	AAACAATCAGAACTAATTACTGCTGTAATTTTCACAA	36	GCAGCTGTGATCGGGTGGGCAGGCATAAACATCTTCCTAATTATAATTAGTTAACCATGCATTTTTGAAACACAGTTTCTTTCTAGACCAAGTCAAACTCTGACCCAAACTAACTCTTTGGATTATTTTAGTTATTAAATGTAGAAAAGCTATATTAAATAGGTAGTTGCCTCCCTACTTTCCCAGTGAACATTGTTAAACCCACAAGTCAAACATGGATCACCCATATTTTGTTAAAGAAACTATGCAATTTAGCACGCTTGACCTAAGAAGCTAAGACCAATCCTTGATAATACTAACATGCCTAACCATGCTCCTAATGCTTACCACTCCAAATTCAAGTATGAAAGCTATTTTGTTATGTAACCTAAAAATAATTTTGAACTTGAGAATCATCGA…	ACAGCTGTGATCGGTTGGGCAGGCATAAACATCTTCCTAATTATAATTAGTTAACCATGCATTTTTGAAACACGGTTTCTTTCTAGACCAAGTCAAACTCTGACCCAAACTAAATCTTTGGATTATTTTAGTTATTAAATGTAGAAAAGCTATATTAAATAGGTAGATGCCTCCCTACTTTCCCAGTGAACATTGTTAAACCCACAAGTCAAACATGGATCACCCATTTTTTGTTAAAGAAACTATGCAATTTAGCACGCTTGACCTAAGAAGCTAAGACCAATCCTTGATAATACTAACATGCCTAACCATGCTCCTAATGCTTACCACTCCAAATTCAAGTAAGAAAGCTATTTTGTTATGTAACCTAAAAATAATTTTGAACTTGAGAATCATCGA…
185	Chr01	14055813	14012943	TTATTAATTAAAATTCAAAAAGAAATTGGCAAAC	T	33	ATGGCGACAAGGGCTGGGGGCGAAAATAAGTTAAGTCCAAGCTGGGGGCCGCGAAGCCAGCCCAGCCTCTGGACCTCTTTCGCCACACCCACACCCTTCGCCACAGTACCCGCAAGGTACGACGAAAAGGGCTGGGGTCGAAAATGAGTTGCTTCCAACTGGGGGGATTCGAAGCCGCCCTAGCCTCTAGACCCCTTTCGACACTTCCACGACCACCGCAAAAGTACCCGCAAGGTACGGCGACAAGGGCTAGGGGCAAAAAGGATTTAAGTCCAAGCTGGGGGCCGTGAAGCCAGCCCAGCCTCTGGACCCCTTTCACCACACCCACACCCTTCGCGATAGTACCCGCAAGGTACGACGATAAGGGCTGGGGGCGAAAAGGAGTAAAGTCCAAGTTGG…	ACGGTGACAAGGGCTGGGGGCGAAAATAAGTTAAGTCCAAGCTGGGGGCCGCGAAGCCACCCCAGCCTCTAGACCTCTTTCGCCACACCCACACCCTTCGCCACAGTACCCGCAAGTTACGGCGAAAAGGGCTGGGGGTGAAAATGAGTTGCTTCCACGTGGGGGGATTCAAAGCCGCCCTAGCCTCTAGACCCCTTTCGACACACCCACATCCACCGCAAAAGTACCCGCAAGGTACGGCGACAAGGGCTGGGGGCAAAAAGGATTTAAGTCCAAGCTGGGGGCCGTGAAGCCAGCCCAACCTCTGGACCCCTTTCGCCACACCCACACCCTTCGCGATAGTACCCGCAAGGTACGACGATAAGGGCTGGGGGCGAAAAGGAGTAAAGTCCAAGTTGG…
186	Chr01	14261317	14074880	A	AAGAGGGCGATTTCAGCAAAGACTTTTTGCC	30	GCCATTGCCATGTAATAGTCAATGTGGCCAAAACCACTTATAAAACCGCTCTATAAGTTTATTTCAACTGTTTTGTATACTTAACGGGATAGAATATCCATTTCATAATTCAGAGGTTAAGTAACATGCGATAGTCAATGTGGCCAAAACCACTTATAAAACCACTCAATAAGTTTATTTCAACTTATTTGTATACTTTACGGGGTAGAATATCCATTTCATAGTTAAGAGGTTAAGTACCATATAATAGTCAATGTGGCCAAAACCATTTATAAAACCACTCTATAAGTTTATTTCGATTGGTTTGTATACTTCACAGATAGAATATCCATTTCATAATTCAGAGGACAAGCCTTGGTGCATCAGAATAAACAAGATTTAGGAGCGGCTGTGTGGACA…	TACTTAACACATGCCATTGCCATGTAATATTCAATGTGGCCAAAACCACTTATAAAACCGTTCTATAAGTTTATTTCAATTGTTTTATATACTTAACGGGATAGAATATCCATTTCATAATTCAGAGGTTAAGTAACATGTAATAGTCAATGTGGCCAAAACCACTCAATAAGTTTATTTCAACTTATTTGTATACTTTACGAGGTAGAATATCCATTTCATAGTTAAGAGGTTAAGTACCATATAATAGTCAATGTGGCCAAAACCACTTATAAAACCACTCTATAAGTTTATTTCAATTGGTTTGTATACTTCACTGATAGAATATCCATTTCATAATTCAGAGGACAAGCCTTGGTGCATCAGAATAAACAAGATTTAGGAGCGGCTGTGTGGACA…
187	Chr01	14267021	14080675	GTGCATGTATAATATGACTCTAATAATTGAACTACTGAAAAT	G	41	TTGTATCGAACCGAGACAGCTCCTGGCGCGAACTCTCATGTTTTCCTCCAAATAAAATTGGGTGAGCCATACCACGGAAACTTGTTCTCTTCTCTCTCAAGAACTCCTCGTACAATGGACTCAACTCGATCCCCATCAGTGCATGATAACCCACAAACAAGACAGGACCTTGGTCAGGAACACCAGCAAGGCCACGAACAATCTTCCCATTCTTCAGGGTAGACAGCATGACTGGGCTCAATGCAAGGTGAAACAATCTGCACAAGTTTTAGTTCGCTAATTACTGATTCATTTATATGGCAAAATTACATGCAAAAGTAAATAGAATTTTGAATTTTGAATTCTCATAGTGCGTTAACATACTTGTGATCTTCATCGAATGTTTTCTTGAACTCACTC…	AACCGAGACAGCTCCTGTCGCGAACTCTCATGTTTTCCTCCAAATAAAATTGGGTGAGCCATACCACGGAAACTTGTTCTCTTCTCTCTCAAGAACTCCTCGTACAATGGACTCAACTCGATCCCCATCAGTGCATGATAACCCACAAACAAGACAGGACCTTGGTCAGGAACACCAGTAAGGCCACGAACAATCTTCCCATTCTTCAGGGTAGACAGCATGACTGGGCTCAATGCAAGGTGAAACAATCTGCAGAAGTTTTAGTTCGCTAATTACTGATTCATTTATATGGCAAAATTACATGCAAAAGTAAAATAGAATTTTGAATTTTGAATTTTGAATTCTCATAGTGCGTTAACATACTTGTGATCTTCATCGAATGTTTTCTTGAACTCACTC…
188	Chr01	14314824	14144977	C	CTAGCTTCTGTTAACTACAGTCTTCTGTGTTTGGGTTC	37	GTTGCAGGTGCGCTTGTTGTAGCTTGCTATGCCAAACAGTATCGGCATACCAGTTAATTGCCAAAAGCTACACCACACAATTGAATATGATCTGAAATCCAGAAGTTCTTTTTTTCTAGTGATCAGCATGCTGTTTTGACTTCCTTACTAGAATCAATCACATGGCCAATCGAACATATGATTGACCATATGGTCTAAACTCCTTGTTTCTAGTAAATCATGTACATTTGGTATGCACTTTTCCTTGTAGGAACATGATTCTTCTTATCACTAATAAATTGCTCCATCTTGCTTTTGTTACTAATATCTACAGCAGCTCATTTTTACCATTGGTGTGTTAGTGCTTTTTCTCACTTCTACTACTCAACTTTTAACCAATTTCAGCCTCCTTCGACCTAC…	GTTGCAGGTGCGCTTGTTGTATCCTGCTATGCCAAACAGTATCGGCATACCAGTTAATTGCCAAAAGCTACACACGCAATTGAACAATGATCTGAAATCCAGAAGTTCTTTTTTTCTAGTGATCAGCATGCTGTTTTGACTTCCTTACTGGAATCAATCACATGCCCAATCGAACATATGATTGACCATACGGTCTAAATTCCTTGTTTCTAGTAAATCATGTACATTTGGTATGCACTTTTCCTTGTAGGAACATGATTCTTCTTATCACTAATAAATTGCTCCATCTCGCTTTTGTTACTAATATCTACATCAGCTCATTTTTACCATTGGTGTGTTAGTGCTCTTTCTCACTTCTACTACTCAACTTTTAACCAATTTCAGCCACCTTCGACCGAC…
189	Chr01	14597114	14512084	GCAGCATCCACAAAATCAACATCCAAGAACA	G	30	TTGATGCTTGGGATGCCATGTCTGATTAGATTGGACTTAAATAGGACTCAATGTGGACTTATTCCAAGCAGTAGCGGTAGTAGTGCAGGCCTTGGGCCTTGGCCCATGCAGCAGCAAATAGCCGCTAGGTACTCCCAATAGAGCAGCAAGAGCTAGCAAACAGATCGGCAGCAGCAGCTAAAGTTTAGTCCTATTTGGAGAGAATGTCACCAACTTAGAAAACTAGAAAAGAGATGGATGCTGAGGATTTAACACTGGCTCGAACGATGACGAAAATACGGTGTTACATTGTGGGTGTGATCTAGCAATTTTAGGAACCGGTAAACATTAGATTCCACAAATAAAGAAAAAGTCAACTCGAAACATGGGATGAATCGACCAATGCTTTGAGCAACCCCA…	TTTGATGCTTGGGATGCCATGTCTGATTAGATTGGACTTAAATAGGACTCAATGTGGACTTATTCCAAGCAGTAGCGGTAGTAGTGCAGGCCTTGGGCCTTGGCCCATGCAGCAGCAAATAGCCGCTAGGTACTCCCAATAGAGCAGCAAGAGCTGCAAACAGATCGGCAGCAGCAGCTAAAGTTTAGTCCTATTTGGAGAGAATGTCACCAACTTAGAAAACTAGAAAAGAGATGGATGCTGAGGATTTAACACTGGCTCCAACGATGACGAAAATACGGTGTTACATTGTGGGTGTGATCTAGCAATTTTAGGAACCGGTAAACATTAGATTCCACAAATAAAGAAAAAGTCGACTCGAAACATGGGATGAATCGACCAATGCTTTGAGCAACCCCA…
190	Chr01	14606948	14521858	T	TTTGGTTTGCATCGAAATTTAGGGTTTTCACTT	32	GGGGGAAGGAGATGGAGAAGGCGCTGGCGAGGCTCCTCGGCCGCAGCCCCGCCGTGCCGGCGGTGTTCATCGGCGGGAGGCTCGTCGGCTCCACCGACAAGGTCATGTCGCTGCACCTCAGCGGCAACCTTGTCCCGCTGCTTCGCAATGCGGGTGCCCTCTGGGTGTAGCACCAACGACGCAACTATACCTACCAGCGACTGGTTCTTGATTTGGACTGATACCGTGGCGCAGAATAATTTTATACGGGTACTTTGGTTTGTATCAGGCAGGTCAGGTATATCTAAGGGAAAATAAATAGTACGTGCAGGCCTTTTTTGCACTGCAATACTAGTAAATCTATAGAGAGTGGGGAATTAAGTGTGTCATGTCAGCCGCCTGTAAGGCTCTTTTGAGATG…	AAGGAGATGGAGAAGGCGCTGGCGAGGCTCCTCGGCCGCAGCCCCGCCGTGCCGGCGGTGTTCATCGGCGGGAGGCTCGTCGGCTCCACCGACAAGGTCATGTCGCTGCACCTCAGCGGCAACCTTGTCCCGCTGCTTCGCAATGCGGGTGCCCTCTGGGTGTAGCACCAACGACGCAACTATACCTACCAGCGACTGGTTCTTGATTTGGACTGATACCGTGGCGCAGAATAATTTTATACGGGTACTTTGGTTTGTATCAGGCAGGTCAGGTATATCTAAGGGAAAATAAATAGTACGTGCAGGCCTTTTTTGCACTGCAATACTAGTAAATCTATAGAGAGTGGGGAATTAAGTGTGTCATGTCAGCCGCCTGTAAGGCTCTTTTGAGATGTAATA…
191	Chr01	14607483	14522424	G	GACTCTCCATATAGGACTATTATCACTAAATG	31	CTGAAATTTCCAAAAATTTTGGGAAATTTTCAACTTTTTGTCCGAAATTATTTGAAAATTTTACCAATTTTTGACTGAATTTGAATACATTTTGATCAAATTCACAAAAGTTTGAAAAAAAATTAGGGTGCAAATTTTGCTTGCCGGAAGGGGGGGGGGGCAAAATTACTAAAATTTCAAAAAACTTAAACCGAAATTGAAATCCCTGATCTACTCTAGCACAAACACATATATGCTTAATTAGGAAAACCATCTCCAAACTGGTAGGACGATTGGTTAATTAGGGACTTGGGGTATACCTCTTGGGATGTGGATCAAGAACCTATAACACAGCGTCTTCAAACTCGCATTAGTTCACTCTACACGCTGAGTGGACCCACATTCACATAATCACATAGC…	ACTGAAATTTCCAAAAATTTTGGGAAATTTTCAACTTTTTGTCCGAAATTATTTGAAAATTTTACCAATTTTTGACTGAATTTGAATACATTTTGATCAAATTCACAAAAGTTTGAAAAAAAATTAGGGTGCAAATTTTGCTTGCCGGAAGGGGGGGGGGCAAAATTACTAAAATTTCAAAAAACTTAAACCGAAATTGAAATCCCTGATCTACTCTAGCACAAACACATATATGCTTAATTAGGAAAACCATCTCCAAACTGGTAGGACGATTGGTTAATTAGGGACTTGGGGTATACCTCTTGGGATGTGGATCAAGAACCTATAACACAGCGTCTTCAAACTCGCATTAGTTCACTCTACACGCTGAGTGGACCCACATTCACATAATCACATAGC…
192	Chr01	14645664	14563203	AAGGGGCCTGAACCAGTATAATCCTTATCTCTTTGTTTG	A	38	GAAAAACAATGTTTTTAGACCATTCCTTACTACTAGTTATCATGGTTACGGATAAGGCATACCCTCTATCCTACTAGTCATGGAATATACGGATACGTCATACCTTCGTATGTATGATAAAGCTCCGCACGCGATAAGAACATCAACAAGAGATTATGGAAATAATCCTCATGGGCAAGTGCATGACAGAGTACTACTCGGCAAGGATTAGGACTATATTATATCGTGCAGTATCTGGGGTCTCCGAGTTCTACTTGGAGACCAAGAGAATTCACGGTATAAATACATACCCCCTGAGGGGTCCAAGGCATCGAATTATAACACTAGCCACCCGTCACCAAAGAAGTAATCTGGAAGACTTGAAGCCTGCTCGCCGGTAGATCTTGTCGAGACTCTCTT…	GAAAAACAATGTTTTTAGACCATTCCTTACTACTAGTTATCATGGTTACGGATAAGGCATACCCTCTATCCTACTAGTCATGGAATATACGGATACGTCATACCTTCGTATGTATGATAAAGCTCCGCACGCGATAAGAACATCAACAAGAGATTATGGAAATAATCCTCATGGGCAAGTGCATGACAGAGTACTACTCGGCAAGGATTAGGACTATATTATATCGTGCAGTATCTGGGGTCTCCGAGTTCTACTTGGAGACCAAGAGAATTCACGGTATAAATACATACCCCCTGAGGGGTCCAAGGCATCGAATTATAACACTAGCCACCCGTCACCAAAGAAGTAATCTGGAAGACTTGAAGCCTGCTCGCCGGTAGATCTTGTCGAGACTCTCTT…
193	Chr01	14708788	14646252	A	AGCACTAGTGTTACCACTGGACTGGAGCACTAGTGTGTGGTGTTTACC	47	TCAGGAGCAGATAAAATCATGTCGTAGAGGGCAGAAGAGCAGAGGCATCACGTGTGTACACGTACGTTGCGTTTGAGGTGTTCGGGGCTCTTGTGCTCCATGACCGTGAAGTCGACGTTGACGACCTCGTACTCGGCGCCGACCTCCTCCAGGCACAACAGCACCCTCGCCACGTTCGTCGATTGCGCCGGCCCAAACACCTTCACCGGCGTCATCTTCTCAGCTATCCGAGCTCACGGCCACTGGTCGGCTGCGCGAGTGAGCGTGCGCAAACAAGGAGGAGTCTTTAATTGGAGCTTAGCTGGTGTGTGTTGTACGTGCCTGGTGGTAGCTTTAGCATGCGGTGCGCGAGGCCGGCTTTTATAAGCTAGCGGTGATTTCTTGAGAGAAAAAATTGCA…	TCAGGAGCAGATAAAATCATGTCGTAGAGGGCAGAAGAGCAGAGGCATCACGTGTGTACACGTACGTTGCGTTTGAGGTGTTCGGGGCTCTTGTGCTCCATGACCGTGAAGTCGACGTTGACGACCTCGTACTCGGCGCCGACCTCCTCCAGGCACAACAGCACCCTCGCCACGTTCGTCGATTGCGCCGGCCCAAACACCTTCACCGGCGTCATCTTCTCAGCTATCCGAGCTCACGGCCACTGGTCGGCTGCGCGAGTGAGCGTGCGCAAACAAGGAGGAGTCTTTAATTGGAGCTTAGCTGGTGTGTGTTGTACGTGCCTGGTGGTAGCTTTAGCATGCGGTGCGCGAGGCCGGCTTTTATAAGCTAGCGGTGATTTCTTGAGAGAAAAAATTGCA…
194	Chr01	14776380	14740678	CAGCACAACCCACAGGCCAGCGTGCCGTGCC	C	30	ATGAGAACCGATAGCTGGCCAAACAGGTGGCCTGGCCCAATGCGGCATGAGTCCACTGGCAACACAACCCGCTTTAGTACAATTCGTTAGGCACGACACCTGTAGCAGGCTATGCTATGTCGGCCTATGTGCCAAGGCCACGGCCCAAGAATAGCTCAAGAAGACACCGTGTTGTGCTGGGCCATCACAGCATGACTACTGTTACGGCTCGTGGGTCAATGACAGGCCCAACAGTACATATGACCTATGGAAATTGAAATTTGAGGTGGAAAAATAAAAGGCGAAAAAGAAATAGTGAAGGTGGAAAAATAGGAAAAGTAGTAAAAAGGATGGAAAATAATGAGTAAACATATGGAGGAAATGGGAAAAGGTAAGGGAAAATAGGAAAAATATGACTAA…	GATAGCTAGCCAAACAGGTGGCCCGGCCCAACGCGGCATGAGTCCACTGGCAACACAGCCCGCTTTAGTACGATTCGTTAGGCACGACACCTGTAGCAGGTTGTGCTATGTCGGCCTATGTGCCAAGGCCACGGCCCAAGAATAGCTCAAGGACAAACCGTGTTGTGCTGGGCCATCACAGCACGACTACTGTTACGGCTCGTGGGTCGATGATAGGCCCAACAGTACATATGGCCTGTAGAAATTGAAATTTGAGGTGGAAAAATAAAAAGCGAAAAAGAAATAGTGGAGGAGAAAAATGGGGAAAAATAGGAAAAGTAGTAAAAAGGATGGAAAATAATGAGTAAACATATGGAGGAAATGGGAAAAGGTAAGGGAAAATAGGAAAAATATGACTAA…
195	Chr01	14912156	14861137	TGAGGAACAACTCCACCTGAGAGATTTGCAAACTATAAACGGTTTAA	T	46	TAGTGCTAATGGAATTTTTATCAAATCGAATTGGCGAGAAGATGAACAAGAGAGAGGATGGAGGAGGAAGAAATGGTAAGTTAGTCCAAAATTTCATTGTAAGGGCAGTGAGAGGCATATATCCAATATCTACAAGTTTATAATGGTATATATGTTCAAATATATAAATGGTAGTGTTATATTTCAAAACTACAAAAGTTACGATGACAAGCCTACCAGAGGAGGTGAATGGTAGATTATGTCAGCGGAAAACAAATAATCGAATCTTAATAGATTAAAAGTACACCCCAACCTCAAAAACCAATGGAATACACGTCCGGCGGTCTATCCGACCTACTAGAGTCGGTCTGACCAAAACCTAGCCGGTCTAACCGCAGGTCACTCGGCGGTCTAACCGTC…	TAGTGCTAATGGAATTTTTATCAAATCGAATTGGCGAGAAGATGAACAAGAGAGAGGATGGAGGAGGAAGAAATGGTAAGTTAGTCCAAAATTTCATTGTAAGGGCAGTGAGAGGCATATATCCAATATCTACAAGTTTATAATGGTATATATGTTCAAATATATAAATGGTAGTGTTATATTTCAAAACTACAAAAGTTACGATGACAAGCCTACCAGAGGAGGTGAATGGTAGATTATGTCAGCGAAAAACAAATAATCGAATCTTAATAGATTAAAAGTACACCCCAACCTCAAAAACCAATAGAATACACGTCCGGCGGTCTATCCGACCTACTAGAGTCGGTCTGACCAAAACCTAGCCGGTCTAACCGCAGGTCACTCGGCGGTCTAACCGTC…
196	Chr01	14923679	14875611	GATTCCGATAAACCGTCGATATCTTTCTAACGCCGCTGGTTTCGCTC	G	46	GAGCTGCTGCTGTGTTCTTCCCTGCTGTTCCTGTTTTCCCTAATGCTGCCGCCAATTGGATCTGTTCTGGTGTTGGTGCCGCTGCCTGTGCATGCTAACGTTCCTGCTGCTGCTCATGCTATAGCGTGGCTTGCTGCTTGACGCTGCTGCATCGATCAGAGACGAGAAGGCTCCAGACAGCACAGGAAGCAGTTGAACAGGAGTAACAAGGGAAGGAAAAGGTAGAACAACTTTGGGGAATTTCAGCGATTTCGCAGATTAGGGAAATTTGTTGCAAAGTAGTGTTTCTCTGCAATTGGAACTTTCTTTTAGTCTCTAGATGTAAAAGATTTCAATAGGAATTAATTCGTTGGCAGTTTGTGCAATTTCTGAGATTATTGGTTATGGGCTGGAAACCGT…	GAGCTGCTGCTGTGTTCTTCCCTGCTGTTCCTGTTTTCCCTAATGCTGCCGCCAATTGGATCTGTTCTGGTGTTGGTGCCGCTGCCTGTGCATGCTAACGTTCCTGCTGCTGCTCATGCTATAGCGTGGCTTGCTGCTTGACGCTGCTGCATCGATCAGAGACGAGAAGGCTCCAGACAGCACAGGAAGCAGTTGAACAGGAGTAACAAGGGAAGGAAAAGGTAGAACAACTTTGGGGAATTTCAGCGATTTCGCAGATTAGGGAAATTTGTTGCAAAGTAGTGTTTCTCTGCAATTGGAACTTTCTTTTAGTCTCTAGATGTAAAAGATTTCAATAGGAATTAATTCGTTGGCAGTTTGTGCAATTTCTGAGATTATTGGTTATGGGCTGGAAACCGT…
197	Chr01	14945884	14899235	TATATATATATATATATATATATATATATATAT	T	32	ACAAGTAAATCAGTAGAATGAATAAAGGGTTACAAAGTTGTGTTGTTTCCTCAATTATCATGCATAAATATAAGATGACTTAGGGTGTGTTTAGTTCACACCAAACTTCACTCCAACTCCCAACTTTCCATCACATCACATCACATCAAAACTTTCCAACACATATAAACTCCTAACTTTTTTTTTCCAAACTACCAACTTTCCCCAAACTTCTTCCTAATTTCAGAAAAACACAGCCTTATACTTGCAATTAGTGGGAGTACGCACGTGATATGTTCCTACACTACTTATGTTAGTATATAGGTTTGTTAGAGTAGTCATTATTGACTTTGGCTATAGTCGTGTAGTACCATGTGCTTGACATCTAGAACCGTGGAATATATTTCTAGATTTGAAAAC…	ACAAGTAAATCAGTAGAATGAATAAAGGGTTACAAAGTTGTGTTGTTTCCTCAATTATCATGCATAAATATAAGATGACTTAGGGTGTGTTTAGTTCACACCAAACTTCACTCCAACTCCCAACTTTCCATCACATCACATCACATCAAAACTTTCCAACACATATAAACTCCTAACTTTTTTTTTCTAAACTACCAACTTTCCCCAAACTTCTTCCTAATTTCAGAAAAACACAGCCTTATACTTGCAATTAGTGGGAGTACGCACGTGATATGTTCCTACACTACTTATGTTAGTATACAGGTTTGTTAGAGTAGTCATTATTGACTTTGGCTATAGTCGTGTAGTACCATGTGCTTGACATCTAGAACCGTGGAATATATTTCTAGATTTGAAAAC…
198	Chr01	14950725	14904056	A	ATAACAATGTCTATATATCTTAATTTCTTACGTATACAGTAAATACATAG	49	GGTTGTGTGCATAGGAGAGGCACCTCCAGTGTGTTGGTGGTATTTGGTGGCTTCCGTTGGGGACGCTATGTTTGGATGGGACTTCGAGGTGAAAGCCTTACTCAGGTTTGCCGATGCTAGCAACGGCGACGCTCTCGGGCGCCGTTCACTTTCTTGAAGGCGTTATTATTGGAGCCCTTGTTCAACTCCACATCAAGAGATTTCTCCGATGAAAACCATAAATTCGTTAGGGTCGGGCGATGTTGCTGTTCTGTCGGCGTGTCCTTGAAGGCTTCATTTTAGGAGCTTTTCCCTTGTTGGATGGTTATGCTTTGTTCTTAGGTTCAGTTTGTTAATACTAGGGGTTTTGCTGATTTTTCACAAATTAACTAAGCCATTTTAAGGCTTTTGGGTCCGATT…	TGGTTGTGTGCATAGGAGAGGCACCTCCAGTGTGTTGGTGGTATTTGGTGGCTTCCGTTGGGGACGCTATGTTTGGATGGGACTTCGAGGTGAAAGCCTTACTCAGGTTTGCCGATGCTAGCAACGGCGACGCTCTCGGGCGCTGTTCACTTTCTTGAAGGCGTTATTATTGGAGCCCTTGTTTAACTCCACATCAAGAGATTTCTCCGGATGAAAACCATAAATTCGTTAGGGTCGGGCGATGTTGCCGTTCTGTCGGCGTGTCCTTGAAGGCTTCATTTTAGGAGCTTTTCCCTTGTTGGATGGTTATGCTTTGTTCTTAGGTTCAGTTTGTTAATACCAGGGTTTTTGCTGATTTTTCACAAATTAACTGAGCCATTGTAAGGCTTTTGGGTCCGA…
199	Chr01	14991940	14945002	T	TATTCGCTAGAAGAATGGTGAAGAAATGATGATACAGTGATATTAGTGC	48	AAAGATAACTATTCTGATCTTTTTGTATAGAACAAGATGTGGCATGTACTGCTTTAGCACTGACACAGAAATAGTTGTGTGTGGAACAAGTCTGAAGCTTACCTGAGAATAAAGGGGAACCTGATATTCTGACCTAGAATACACTAATAGTTCTTTTTCTCAGATATTCCATGGATCTACTTTGAAAAGAATATAAGAATCTCCATCTGAACATTTACCTTTTATCTTTAAAAAGTTCTAATAATTCATTACCTTTATATCCAGTATTTGATTCCCTATGTGGAAAGAAAACGTGGCAAACTGAATGTCACAATACAACCTGTATCCGAATCTATCTTCTGTATTCACTTATAGAAATTTATAATTAGACTATTGGAATAACTTGAGCTTCATGTAAGA…	AAAGATAACTATTCTGATCTTTTTGTATAGAACAAGATGTGGCATGTACTGCTTTAGCACTGACACAGAAATAGTTGTGTGTGGAACAAGTCTGAAGCTTACCTGAGAATAAAGGGGAACCTGATATTCTGACCTAGAATACACTAATAGTTCTTTTTCTCAGATATTCCATGGATCTACTTTGAAAAGAATATAAGAATCTCCATCTGAACATTTACCTTTTATCTTTAAAAAGTTCTAATAATTCATTACCTTTATATCCAGTATTTGATTCCCTATGTGGAAAGAAAACGTGGCAAACTGAATGTCACAATACAACCTGTATCCGAATCTATCTTCTGTATTCACTTATAGAAATTTATAATTAGACTATTGGAATAACTTGAGCTTCATGTAAGA…
200	Chr01	15109256	15037411	C	CCCTCCGCCAGGCCGCAGCCTAGCCGCCGCCCGCCACCGC	39	TATTTTCTTTTTTCTTTTATTGTTTTTTACTTTGAATATTGATTTCACCATATCCCCAAATCATCCCCAAAATCACTGAACAAGAGATCATCTCTAAAATCCCCATATCATCCCCAAAATCACATAACAAAAGATCATCTCCAAATCCCAGATCGATCATCTACAAATCCACCATATCCAAATACATCACAGATAATCAAAACAAATACATCACAAATTCTAAAAAGAAACATCACAAATACATCACATATTTACATCGCACAGATCAAATACACCACAAATTCTCAAAAGCAAATTCATCGCTTCACCGCTGTCACCTGGCCGCCACCCTCCGCCAGGCTGCACGGCCGCCGCCGCCGCCGCTTCTGCCGCACGCTCCACCTGCGCCGCCGCCACCCT…	TATTTTCTTTTTTCTTTTATTGTTTTTTACTTTGAATATTGATTTCACCATATCCCCAAATCATCCCCAAAATCACTGAACAAGAGATCATCTCTAAAATCCCCATATCATCCCCAAAATCACATAACAAAAGATCATCTCCAAATCCCAGATCGATCATCTACAAATCCACCATATCCAAATACATCACAGATAATCAAAACAAATACATCACAAATTCTAAAAAGAAACATCACAAATACATCACATATTTACATCGCACAGATCAAATACACCACAAATTCTCAAAAGCAAATTCATCGCTTCACCGCTGTCACCTGGCCGCCACCCTCCGCCAGGCTGCACGGCCGCCGCCGCCGCCGCTTCTGCCGCACGCTCCACCTGCGCCGCCGCCACCCT…
201	Chr01	15114406	15042646	T	TCAACCCTTCACCATTCATTTTTCCCACCTAT	31	GAAATGCCTCCATGCATTCATGTTCCTATTCAAAGTCAATATGGACAGCCAGCCTTAACAGGTGACCAATCCCTTATTTCTATAAAGCTAATGTGTACTTAAACACCTAAAACTTAATATGCAAATATAATATTTATTAGCACTCATAAAATTTACACACAAGCATGCCACATCAACCCATGAACTACACAAAACTCAACGTGCAAGCATATAATAATTATATCTATAATTTATTTTATTCTAAAACTAAACATGCACATACTAAATCATCATTCTCAAATCATTTTTATAATATTTCAATCCAAATCTTTTCATCATTTCTCCAATATTTAACATATATCCCGCAGCAAAGCGCAGGCCATTATATAGTACTTCCTCTGTCCCAAAATATAACAATTT…	GAAATGCCTCCATGCATTCATGTTCCTATTCAAAGTCAATATGGACAGCCAGCCTTAACAGGTGACCAATCCCTTATTTCTATAAAGCTAATGTGTACTTAAACACCTAAAACTTAATATGCAAATATAATATTTATTAGCACTCATAAAATTTACACACAAGCATGCCACATCAACCCATGAACTACACAAAACTCAACGTGCAAGCATATAATAATTATATCTATAATTTATTTTATTCTAAAACTAAACATGCACATACTAAATCATCATTCTCAAATCATTTTTATAATATTTCAATCCAAATCTTTTCATCATTTCTCCAATATTTAACATATATCCCGCAGCAAAGCGCAGGCCATTATATAGTACTTCCTCTGTCTCAAAATATAACAATTT…
202	Chr01	15150285	15078500	TGCATGTTCAGATAGAGGGATATGAAAAATTTGCTGAAAGTAATT	T	44	AAAACCTCAATGAAGAAGATCTGCTGGAAGCTATTATGAGCAGTGATAATCATATTCATAAATTCCATTGTTAGATTCCATTGAATGCCAACATACTGCCAACATTGCTGCGCAAACTGACAGGACAAGAAGAGATGCATCATATCCTCATGTACTGAAGAATTACACATTACACATCTATTGCCACCTTGGATATGAAAATTTTTCTTTTGCAACATTTCTCTTGTGTTGAGTCTGTCCATGAGCATTAACCAGAGGAACACTTTGAGTTTTAGGGTGCACTCACTCTTCCAAATCAAAACCAGTGGCCTTTCAGCTACTAGATGTTGAAAAAACAGGTTATAGACTTTTTTAGCTTGAAAGTGGTCACTGTTCCAGATATAAGTCCATCTGTCCGAA…	AAAACCTCAATGAAGAAGATCTGCTGGAAGCTATTATGAGCAGTGATAATCATATTCATAAATTCCATTGTTAGATTCCATTGAATGCCAACATACTGCCAACATTGCTGCGCAAACTGACAGGACAAGAAGAGATGCATCATATCCTCATGTACTGAAGAATTACACATTACACATCTATTGCCACCTTGGATATGAAAATTTTTCTTTTGCAACATTTCTCTTGTGTTGAGTCTGTCCATGAGCATTAACCAGAGGAACACTTTGAGTTTTAGGGTGCACTCACTCTTCCAAATCAAAACCAGTGGCCTTTCAGCTGCTAGATGTTGAAAAAACAGGTTATAGACTTTTTTAGCTTGAAAGTGGTCACTGTTCCAGATATAAGTCCATCTGTCCGAA…
203	Chr01	15227647	15159323	G	GTTTCAATACATATGTACATGCATAATATATATG	33	TTATAGGAGAAATGGAAGATGAAGAGTAAGATAGCCGTGGAATATGAAGAGGAATAGAGTAACTAATTGTCATCAACTAGCTATCAACTATCCTCCACTACACAACCATCAATTAGGAGTACTTGATATATGCTACCAATAGAATAGGAAGAGGAATAGAGTAACTAATTGTCATCAACTAGCCATCAACCATTATCCAATACACAACCATCAAACAACCATCAATTTGGAGTAATTGATATAGCACTGGTGGAGAAACCCTTTGTAGTCCCGGTTCGTAACCCCCCTTTAGTCCCGGTTTCCAAACCGGGACTACCAATCCGGGACTAAAGATCGCTATCTTTAGTCCCGGTTTCCAAACGGCTGGGCCATCTTTAGTCCCGGTTGGTGTTACCAACC…	TATAGGAGAAATGGAAGATGAAGAGTAAGATAGCCGTGGAATATGAAGAGGAATAGAGTAACTAATTGTCATCAACTAGCTATCAACTATCCTCCACTACACAACCATCAATTAGGAGTACTTGATATATGCTACCAATAGAATAGGAAGAGGAATAGAGTAACTAATTGTCATCAACTAGCCATCAACCATTATCCAATACACAACCATCAAACAACCATCAATTTGGAGTAATTGATATAGCACTGGTGGAGAAACCCTTTGTAGTCCCGGTTCGTAACCCCCCTTTAGTCCCGGTTTCCAAACCGGGACTACCAATCCGGGACTAAAGATCGCTATCTTTAGTCCCGGTTTCCAAACGGCTGGGCCATCTTTAGTCCCGGTTGGTGTTACCAACCG…
204	Chr01	15278733	15198620	AAAACCATGTGCTCACAACCCACCATTGACA	A	30	CCAAACCTCCATACCAGGAATATACCATTCCAAACCAGGAGTCAAATTAATTACCACAATTACCATTAATGAATAATGTGAGACTAATCACGAAAAACATTGCTCAACTCACCCATTACCGCGGGCACGGCTATTCGAATAGTTTTACTCTAATCAGAGGTGTACCACTGTACCCACAAGACACAATCCCACAACACTGTCACCATGCGCCTCAGCACCACCACGGTACCTCGGAAAGAAACTGTGACAATACCCCTCGCACAACACAACTCACCACAGTGCACCGTTCCTGGATCATAATCTCCCCCTCAAAACCAGAGGCAATGGACTCCCCAGCGACCCCCACGGACTTCTCGCCGCTTCACAGCCTGGCACACTATAATGAATCATGCTATACAA…	CCAAACCTCCATACCAGGAATATACCATTCCAAACCAGGAGTCAAATTAATTACCACAATTACCATTAATGAATAATGTGAGACTAATCACGAAAAACATTGCTCAACTCACCCATTACCGCGGGCACGGCTATTCGAATAGTTTTACTCTGATCAGAGGTGTACCACTGTACCCACAAGACACAATCCCACAACACTGTCACCATGCGCCTCAGCACCACCACGGTACCTCGGAAAGAAACTGTGACAATACCCCTCGCACAACACAACTCACCACAGTGCACCGTTCCTGGATCATAATCTCCCCCTCAAAACCAGAGGCAATGGACTCCCCAGCGACCCCCACGGACTTCTCGCCGCTTCACAGCCTGGCACACTATAATGAATCATGCTATACAA…
205	Chr01	15449891	15378196	CGACTCCACCGCCGGCCTGCCTCCGTCGCCGCT	C	32	ATATTTTATTCCTGATGACTAATCACGGGTTAATGCCTGACTTTCCTTTGTCTTCTGTTTAATGTCGATTGTTGGCGAGTCCGATCATGTATCGTCAAGCTTTCAGCCTTGCTGTGACTCGGACAAAGAAAAAGCACCAGCATTTGATCGACAAGCAATTGACACGGCCTTATCAGTTCCCGTGGCTAGCAAAATCATGCCATGCATATGAGATATTAAGCATTTATATTTTTGATCGCTAATCAACTCTTCCTGGTGTTTCTGTGTTTGCATATATTGGTTGGATTGAGGTTGAGCCGTGCGGATGATATACACGGCCACGGCAATGACCTGCACCTACCATAGTTCGACGCGGAGGACCCGTTTTATTTGTCGACGGGTACGTCACCTCCACCGTTG…	ATATTTTATTCCTGATGACTAATCACGGGTTAATGCCTGACTTTCCTTTGTCTTCTGTTTAATGTCGATTGTTGGCGAGTCCGATCATGTATCGTCAAGCTTTCAGCCTTGCTGTGACTCGGACAAAGAAAAAGCACCAGCATTTGATCGACAAGCAATTGACACGGCCTTATCAGTTCCCGTGGCTAGCAAAATCATGCCATGCATATGAGATATTAAGCATTTATATTTTTGATCGCTAATCAACTCTTCCTGGTGTTTCTGTGTTTGCATATATTGGTTGGATTGAGGTTGAGCCGTGCGGATGATATACACGGCCACGGCAATGACCTGCACCTACCATAGTTCGACGCGGAGGACCCGTTTTATTTGTCGACGGGTACGTCACCTCCACCGTTG…
206	Chr01	15528593	15456871	G	GCGGCTGCAAAGCGCAGCCGAAGAGGTCTATTATATAGTATATAATATGTTGTA	53	ACACAATCTAGCCTCCACGTTGGCTCTCGCCACATGAAAATTCTTATATTAATAAAAGGAATCTATATGGAAGTATAAATTAAAAATAACTGAAATGCAAAATTAAAAAATAAAAAATATTAGAAAAGAAGACTAAAGTCCATACAAATATAAAATTTAGAAGTAATCGAAATTTGAAATTATAAAAAGAAAAGAAAACTAAAAGTAGAGGTTAGAGTCCGCATAGAAATAAAATATAAAAATAACTAAAGTTTAAAATTAATAAATAAAAAAATATTAGAAGAAGTGTCTAGATATGTGATTATCACTGTATTAGGTGCCCTCCAATATGGGCAGACCATGTACGGCCAGGAAGAGAGGATGGACCGGTGCTGCAACACCAAATTGCTAAGCATTATT…	ACACAATCTAGCCTCCACGTTGGCTCTCGCCACATGAAAATTCTTATATTAATAAAAGGAATCTATATGGAAGTATAAATTAAAAATAACTGAAATGCAAAATTAAAAAATAAAAAATATTAGAAAAGAAGACTAAAGTCCATACAAATATAAAATTTAGAAGTAATCGAAATTTGAAATTATAAAAAGAAAAGAAAACTAAAAGTAGAGGTTAGAGTCCGCATAGAAATAAAATATAAAAATAACTAAAGTTTAAAATTAATAAATAAAAAAATATTAAAAGAAGTGTCTAGATATGTGATTATCACTGTATTAGGTGCCCTCCAATATGGGCAGACCATGTACGGCCAGGAAGAGAGGATGGACCGGTGCTGCAACACCAAATTGCTAAGCATTATT…
207	Chr01	15554951	15482921	A	ATGTGTGTGTATATATATATATATGTGTGTATATATATATATATATGTG	48	ATATCAAAAACTAATAATCACATATGCCAATTGTTCATCACAGAATAAGAATCAAAACACACATTGATCTTACACGTGGCATGCTTTTCAAACTGCTAAACGGTGTATTTCGTGTGAAAACTATAGGGACCCACGTATTCCACTTCTGAGGTAGAATACCGGTCTACGGCTCATTCCTTGGTAAGAACCAACTTACCAAGAAATGGGCACATCAAAGTAGCATAGCAGAAACAATTGCAGCGAAACCCATTAAATAAAAACCATAAGAAATTATTTTTTACCAAAATAATAACACTAACAGCACCTTGCTCTTCTAGATCTTCATCACCTTCAACATTAAGTTGATGTAGAGATATGCCACACTTGATCAATTTTGTAAAATCTTCTCTTCACCTAATT…	CAAAAACTAATAATCACATATGCCAATTGTTCATCACAGAATAAGAATCAAAACACACATTGATCTTACACGTGGCATGCTTTTCAAACTGCTAAACGGTGTATTTCGTGTGAAAACTATAGGGACCCACGTATTCCACTTCTGAGGTAGAATACCGGTCTACGGCTCATTCCTTGGTAAGAACCAACTTACCAAGAAATGGGCACATCAAAGTAGCATAGCAGAAACAATTGCAGCGAAACCCATTAAATAAAAACCATAAGAAATTATTTTTTACCAAAATAATAACACTAACAGCACCTTGCTCTTCTAGATCTTCATCACCTTCAACATTAAGTTGATGTAGAGATATGCCACACTTGATCAATTTTGTAAAATCTTCTCTTCACCTAATTGTTA…
208	Chr01	15698501	15637811	ATATATATATATATATATATATATATATATGTGTG	A	34	AGAAAATCCATAATAAATTATTCCTATCGTAAAATCCAATGTGAAATTTTTCTAAAAAAAACATTGTTGTGTGCTCTTTCAGCTAAGAATAATCACATTTGTAAAATCTTGATTTGAAATGCAGGTTGCTATTAATGCCCTAGGGAAGGTCTGAATTATTTTCAGAGCTGCCATTTTTCAGCTTGTATAGCTTGTCATTTTTGTAGCTCCTAAACCATGGCTGAAAGCGTGATAATTCTTTAACCAAAATTAGCTTTAGGACACCTCCTACCCGCTGTATTTTTGCCTTGAGTTGCTGATCATGTTGCATGCACATATTTATTTGGTTCTTATTTGCATATTGCTTCTTTTCGATAAATTCGGATGTTCCAGACTGTGACGAGCAGTACCCTGAGGTTG…	AGAAAATCCATAATAAATTATTCCTATCGTAAAATCCAATGTGAAATTTTTCTAAAAAAAACATTGTTGTGTGCTCTTTCAGCTAAGAATAATCACATTTGTAAAATCTTGATTTGAAATGCAGGTTGCTATTAATGCCCTAGGGAAGGTCTGAATTATTTTCAGAGCTGCCATTTTTCAGCTTGTATAGCTTGTCATTTTTGTAGCTCCTAAACCATGGCTGAAAGCGTGATAATTCTTTAACCAAAATTAGCTTTAGGACACCTCCTACCCGCTGTATTTTTGCCTTGAGTTGCTGATCATGTTGCATGCACATATTTATTTGGTTCTTATTTGCATATTGCTTCTTTTCGATAAATTCGGATGTTCCAGACTGTGACGAGCAGTACCCTGAGGTTG…
209	Chr01	16326914	16538658	TTAAAGGGTTGGACCTATTTCATCAAGATTGGAA	T	33	TTCATCACTTTGAGCGTAATCCTCTCCGCTCGATTCCTCAGGCTCACTCACGGGATCCGGAGAGGACGCACGACGACTATGACGAGTGCGGGGAGGCATCACTGTCAAAGAACAAAGGATGATAGGATATTAGCAATAATTCTATAAACAATTTAGAGAGGTGAAAATTTGCCTATATCCTGTGGAGGTGTGGTCAGGCCGCAGCCAGTAGGGCGGTCAGACCGACGGCATCAGGCCGGTCAGACCGCCTATGGTAGCCGGTCAGACCGACGGCATCAGGCCGGTCAGACCGCCCACCGGTGGCCAGTCAGACCGACGTCTGCCGGCCGGTCAGACCGGGCGCACACGCCGGTCAGACTAGCGGCTGACCCACGGTCAGACCGCCTGTGGCTCCGGGCA…	TTCATCACTTTGAGCGTAATCCTCTCCGCTCGATTCCTCAGGCTCACTCACGGGATCCGGAGAGGACGCACGACGACTATGACGAGTGCGGGGAGGCATCACTGTCAAAGAACAAAGGATGATAGGATATTAGCAATAATTCTATAAACAATTTAGAGAGGTGAAAATTTGCCTATATCCTGTGGAGGTGTGGTCAGACCGCAGCCAGTAGGGCGGTCAGACCGACGGCATCAGGCCGGTTAGACCGCCTATGGTAGCCGGTCAGACCGACGGCATCAGGCCGGTCAGACCGCTCACCGGTGGCCAGTCAGACCGACGTCTGCCGGCCGGTCAGACCGGGCGCACACGCCGGTCAGACTGGCGGCTGACCCACGGTCAGACCGCCTGTGGCTCCGGGCA…
210	Chr01	16412690	16597888	TATATATATATATATATATATATATATATATATATATATATATATATAT	T	48	ATAATTTATTAAATAATTTATAAACCCTAAGACGAAAATCAGGGTGTGACACACCGCCCCTCCGCGCCGCCGCCCGCCTTGCCGGCTGGACAGAGGGCGTCAACAGCGCCGGCGAGGCCCCCCCGACCAGCCTCCTCCCCCTCCCCCCCTCCTTCCTCCTTGAGCAGTCGGCGGCGAGATGCCTCCTCCACCAACGCCGGCCCACCGCCGTCCTCCAGCCTGCCACCTCCCACGGCCATCCCTCTAAAGCCGGCAAACTCCCCCCTCTTCCCCCTCCCCTTCCCCCCCTCTTCCCACCCCCACCCCACCCCGGGACCCTAATTCGTTGGCCCTCTACTGGAGTTCGGGTTCGCCAGCGCCGGAGGAGAAGAGGTGGTCGCCGGAGTTGGAGAAGAAGAA…	GCACGAACTCCCGCTGCCACCGCCCCTCCGCGCCGCTGTCCAGCCGTCAGCCACCGCCCCTCCGCGCCGCCGCCCGCCTTGCCGGCTGGACAGAGGGCGTCAACAGCGCTGGCGAGGCCCCCCCGACCAGCCTCCTCCCCCTCCCCCCTTCCTTCCTCCTTGAGCAGTCGGCGGCGAGATGCCTCCTCCACCAACGCCGGCCCACCGCCGTCCTCCAGCCTGCCACCTCCCACGGCCATCCCTCTAAAGCCGGCAAACTCCCCCCTCTTCCCCCTCCCCTTCCCCCCCTCTTCCCACCCCCACCCCACCCCGGGACCCTAATTCGTTGGCCCTCTACTGGAGTTCGGGTTCACCAGCGCCGGAGAAGAAGAGGTGGTCGCCGGAGTTGAAGAAGAAGAA…
211	Chr01	16415349	16600500	AGTTAAAACTTAATTAATTATGCAATAAAATAAACTTCGTTTTGTGTGCCTGGTA	A	54	GCATTCCCCCGCTAATAAAAACCGCGTTTCGGTCAGGGTGGCTATAGCTTGCGGGGGAAGGGAAATTGGCTGCGCCGCTGACCACTGGAGATGGACTGGCACTGGAACGCAGCGGCGTGTGGTGGGTGGTGGCACCGAACGAACCTGCCTGCCTGCGTGCGTCGCGTCGCGTGGGTTGGGACGTTGGGTTGGCGGCTGCAGCTTGCTGCTGCCGTTGGTTGGAAGCATCCCACGGGATGGAAACGTTTGCGCGTGCTTTCCAATCGTTTTTTGTGGGCAGCATGGGAAAGCGTGCGTGCGAGTATTAGCTGTCTACAGTCCATGTTGCACTGTAGCTGTTTTGTGCGTCTGGGACTGTATCACGCATTGACGCTACTTCTTGCCCTATTGGTTTTCCAC…	CATTCCCCCGCTAATAAAAACCGCGTTTCGGTCAGGGTGGCTATAGCTTGCGGGGGAAGGGAAATTGGCTGCGCCGCTGACCACTGGAGATGGACTGGCACTGGAACGCAGCGGCGTGTGGTGGGTGGTGGCACCGAACGAACCTGCCTGCCTGCGTGCGTCGCGTCGCGTGGGTTGGGACGTTGGGTTGGCGGCTGCAGCTTGCTGCTGCCGTTGGTTGGAAGCATCCCACGGGATGGAAACGTTTGCGCGTGCTTTCCAATCGTTTTTTGTGGGCAGCATGGGAAAGCGTGCGTGCGAGTATTAGCTGTCTACAGTCCATGTTGCACTGTAGCTGTTTTGTGCGTCTGGGACTGTATCACGCATTGACGCTACTTCTTGCCCTATTGGTTTTCCACA…
212	Chr01	16495999	16675417	C	CGAGGGCGGCCACGCCGGCGCGGTCGGCGGGAGGCGGCGCGCCC	43	GATGATGTGACTTGCCTTGCTCGCTTTCCCAAACGTCGGCTTCAACCTCCACGAAGAGCGGATCTTCGAAGCTGCAGCGTCTACACGACCAACGGAAAAGAAAAGGCTTTTACTCTAATAAACTCTATATAACCAGCAAGAACAAAGCACAAAAATGAGTTCTTGACTTCTTAAGGAAAAATTAGAGACTTGAACGGTCCAATTCCGAGTTCAAATGGCCAAGTTATGGCCATTTGAAGTTTATATGCTCTTTAAATGAATATTTACGAATTTCTTCATTTAAATTTTAATTTAAAAAGGGTTTATTGCGTCAGCCGAGGGGGAGGGGCACGCGCACCGGGTCCACGGGAGTGGGACCCACGCGGCAGCCTCACAGTCCACGGTGGACCGGGTGCACCC…	GATGATGTGACTTGCCTTGCTCGCTTTCCCAAACGTCGGCTTCAACCTCCACGAAGAGCGGATCTTCGAAGCTGCAGCGTCTACACGACCAACGGAAAAGAAAAGGCTTTTACTCTAATAAACTCTATATAACCAGCAAGAACAAAGCACAAAAATGAGTTCTTGACTTCTTAAGGAAAAATTAGAGACTTGAACGGTCCAATTCCGAGTTCAAATGGCCAAGTTATGGCCATTTGAAGTTTATATGCTCTTTAAATGAATATTTACGAATTTCTTCATTTAAATTTTAATTTAAAAAGGGTTTATTGCGTCAGCCGAGGGGGAGGGGCACGCGCACCGGGTCCACGGGAGTGGGACCCACGCGGCAGCCTCACAGTCCACGGTGGACCGGGTGCACCC…
213	Chr01	16617329	16759796	CTGTGCTGAGGCTATCCACTGTTCTAGCTTGAC	C	32	CTGCGGTGATTCTCCGCGCTTTGCTGTGAAAATTCCTAACTAACTTTTAATATTTTTTAATAATCGAGCTAAAAGTAAAAATAATATTAGTTATTAACAACGGGCCTGTTCGGCTGCATATGCTGCAGCGCAGCCGCAGCCACTGCAACCAGCTTACCTAACAGGCCCAACAAATAAAAATGGTTTGTCAAACCATCTTCAAAGAGAAGAAATATATTTAGTAGACTCTGTATGAGATTGTAGATGAAATATGATATTCCCGCACTTTGATTATATGGACGAATATATGTTAATTATTATAAAAATGATGTGTTTGTGTATGTGTGTTAAAAATATTGTGAAAATATTGTGAAGGAAGATGATTGGATGTTGATTTATAGAATTCAACGAATTATAGAT…	CTGCGGTGATTCTCCGCGCTTTGCTGTGGAAATTCCTAACTAACTTTTAATATTTTTTAATAATCGAGCTAAAAGTAAAAATAATATTAGTTATTAACAACGGGCCTGTTCGGCTGCATATGCTGCAGCGCAGCCGCAGCCACTGCAACCAGCTTACCTAACAGGCCCAACAAATAAAAATGGTTTGTCAAACCATGTTCAAAGAGAAGAAATATATTTAGTAGACTCTGTATGAGATTGTAGATGAAATATGATATTCCCGCACTTTGATTATATGGACGAATATATGTTAATTATTATAAAAATGATGTGTTTGTGTATGTGTGTTAAAAATATTGTGAAAATATTGTGAAGGAAGATGATTGGATGTTGATTTATAGAATTCAACGAATTATAGAT…
214	Chr01	16987361	17282398	GGTTAAGACAGCCGCATGCGATAATGGATCTTCGCATGCGGCTG	G	43	AAGATCGCTTATGGGTAAACATAGCAAAAAAAATCACTTGTTGGCTAATTTCTGATCTTAGTGAATTTTCCCTTAAGGCTAAACAACGTCATTAAAATCTAAAGGAAAGAATATCTCGATATCATGAGATGTTCCAATCTCCCCTGTAAATGCGGCATCAACTAGAATGACACAGTTTTAACGACATCTTGCTTCCATCATTACAGGTATAATTTTCCACCTCATTCTTATTTAAGCTTAGTTCACTAGTGACGTAGTGGAATTTAAAGCATTGTTGATGCTTGATTAAGTCCACAAATGGATTTCTTAAGTCTGCACCCAATATGTGACTTGTCTTTCCACAACAAAACCATCCGGCTATCACTACTACAAAAATCGTTTTTCTGTACGAGGGGGTCG…	AAGATCGCTTATGGGTAAACATAGCAAAAAAAATCACTTGTTGGCTAATTTCTGATCTTAGTGAATTTTCCCTTAAGGCTAAACAACGTCATTAAAATCTAAAGGAAAGAATATCTCGATATCATGAGATGTTCCAATCTCCCCTGTAAATGCGGCATCAACTAGAATGACACAGTTTTAACGACATCTTGCTTCCATCATTACAGGTATAATTTTCCACCTCATTCTTATTTAAGCTTAGTTCACTAGTGACGTAGTGGAATTTAAAGCATTGTTGATGCTTGATTAAGTCCACAAATGGATTTCTTAAGTCTGCACCCAATATGTGACTTGTCTTTCCACAACAAAACCATCCGGCTATCACTACTACAAAAATCGTTTTTCTGTACGAGGGGGTCG…
215	Chr01	17131260	17438257	A	ATATATATATATATATATATATATATATATATATA	34	CACCATAGCTTGTTGTCATTGCCACTTCTGATGCTCTTCACAGTAGTTGTCTTCCAAATCAAGCCATGCAGTAGTAATGAACATAAAAATCTAAAAATTGCAATGAACGATATTACATCGAATAAGCATTCTATCGAGCAAATCTTTTTGCAACACACACATGAGAACAAAGAGCACCATAAGAACGTGGGAAGGGAAAAGGGAGAGAGGCCGAGTGTTGAAACTGACCTGCTAAGTGATCATGGAGGCGACAACCATGTAGAATGCTGGCACACTCCTAAGTAGTTGGCAGGGCAGGCACCTCATTGGCGGATAGCACTGATGGAGAAAGCGTTTGTAGTCCCGGTTCGTAACCCCCTTTAGTCCCGGTTTTTCAAACCGGGACTAAAGATCGAGCTG…	CACCATAGCTTGTTGTCATTGCCACTTCTGATGCTCTTCACAGTAGTTGTCTTCCAAATCAAGCCATGCAGTAGTAATGAACATAAAAATCTAAAAATTGCAATGAACGATATTACATCGAATAAGCATTCTATCGAGCAAATCTTTTTGCAACACACACATGAGAACAAAGAGCACCATAAGAACGTGGGAAGGGAAAAGGGAGAGAGGCCGAGTGTTGAAACTGACCTGCTAAGTGATCATGGAGGCGACAACCATGTAGAATGCTGGCACACTCCTAAGTAGTTGGCAGGGCAGGCACCTCATTGGCGGATAGCACTGATGGAGAAAGCGTTTGTAGTCCCGGTTCGTAACCCCCTTTAGTCCCGGTTTTTCAAACCGGGACTAAAGATCGAGCTG…
216	Chr01	17311888	17618909	A	ATAATTAATAACTAACATGTATATAAAAAAT	30	AAAATTAAAAAAAATATGGGAAGAAGAGTTTAAGGTCAGAGTACAATTTAGAAGTAAGTGAAATTCGAAATTAAAAATTAAAAAATATTGAAAGATGAGTTTAGAGTCCACATAGAAATACAATTAGAAATAATAAAAATTCAAAAATAAAATAAATAATATTGGAAGAAGAGCATAGAGTGTATATAGAGATACAATTTATAGAAAATTCAGAATAAAAAAAAGAAATATTAAAAGACGAGACTAGAGTCCATATATGAATATATATAATTTACAAATAACTAAAATTTGATATTAAAAAAATTATTAACTAACACGTATATAAAATATAATATGAAAATTCATAAATAAGAATAAATAATATTGGAAGAAGAGCATAGAGTCTATATAGAAATACAA…	AAATTAAGAAAAACATGGGAAGAAGAGTTTAAGGTCAGAGTACAATTTAGAAGTAAGTGAAATTCGAAATTAAAAATTAAAAAATATTGAAAGATGAGTTTAGAGTCCACATAGAAATACAATTAGAAATAATAAAAATTCAAAAATAAAATAAATAATATTGGAAGAAGAGCATAGAGTGTATATAGAGATACAATTTATAGAAAATTCGGAATAAAAAAAAGAAATATTAAAAGACGAGACTAGAGTCCATATATGAATATATATAATTTACAAATAACTAAAATTTGATATTAAAAAAAATTATTAACTAACACGTATATAAAATATAATATGAAAATTCATAAATAAGAATAAATAATATTGGAAGAAGAGCATAGAGTCTATATAGAAATACAA…
217	Chr01	17367013	17678185	T	TATATATATATATATATATATATATATATATATATATATATATCCCGGTA	49	TTACACAACTAATTAAGAGGTTCACTTCTTAATCACTACCTTGTGTTCGTGGGAGTCGTACCAGAAATTGAGCCCATTTGGTTGGCTTGATAGTTTCCAATAGTTGTTTCTACTAGTTTCTAAGCCTAGCTATGTCTTGCATGCATATACAATATACATATTGTCTTGTGGACAAAGAAAGCTAGCTAGGAGGCAGGAAAAGGAAGGAAACAAGCTACACACATGAGCTACCTTTTGTACATGTACCAAACAGATCTCCCAGGGTTTTGGTTAAACTCAAGGTTATGTGCTCAAGAAAAGAAAAAAAGAAACAGCATTCATAGCTAGTTCAAACTTGGCGCGAACTGATGACATGGGGTTGGCTGGACAGCACCGATGTCTAGAAGAGGATATTTGTTT…	TTACACAACTAATTAAGAGGTTCACTTCTTAATCACTACCTTGTGTTCGTGGGAGTCGTACCAGAAATTGAGCCCATTTGGTTGGCTTGATAGTTTCCAATAGTTGTTTCTACTAGTTTCTAAGCCTAGCTATGTCTTGCATGCATATACAATATACATATTGTCTTGTGGACAAAGAAACCTAGCTAGGAGGCAGGAAAAGGAAGGAAACAAGCTACACACATGAGCTACCTTTTGTACATGTACCAAACAGATCTCCCAGGGTTTTGGTTAAACTCAAGGTTATGTGCTCAAGAAAAGAAAAAAAGAAACAGCATTCATAGCTAGTTCAAACTTGGCGCGAACTGATGACATGGGGTTGGCTGGACAGCACCGATGTCTAGAAGAGGATATTTGTTT…
218	Chr01	17538391	2727499	T	TGGGGGCCGCGCATGGCCGCCGGGCGGCGGT	30	TACCCTATATACTTCTGGACATAAATGCAGGATATACACCACAGTGAAGTACATCAGCACATACAGCAGATATACCCTTGTTCAAGTCAGGCAATTTTGCTACAATTGCAAGCATACACAAAAGAACATGATGAAAATTTCTGAAAATGCAACCTCTATCAGATAGTATAAATTAGACAATACTATCCAGATTGAAGAAAAAAAAGAAAGCACAATCAAGAAAGCTTCAGATGTGAAGGAATTCAGAGCATGTAAACTAAACACTGAACAAATCAGGATTGGACTTACCGAAATTGTTCATGTGGAGGAATTCTTCGTCACCTACAGTCCATACTCTGGAGGAACTGCCGATAGAAGCTTCGTGTGAGAGGGGATCCAATGGCTCGCTAGATGTCAGCT…	TACCCTATATACTTCTGGACATAAATGCAGGATATACACCACAGTGAAGTACATCAGCACATACAGCAGACATACCCTTGTTCAAGTCAGGCAATTTTGCTACAATTGCAAGCATACACAAAAGAACATGATGAAAATTTCTGAAAATGCAACCTCTATCAGATAGTATAAATTAGACAATACTATCCAGATTGAAGAAAAAAAAGAAAGCACAATCAAGAAAGCTTCAGATGTGAAGGAATTCAGAGCATGTAAACTAAACACTGAACAAATCAGGATTGGACTTACCGAAATTGTTCATGTGGAGGAATTCTTCGTCACCTACAGTCCATACTCTGGAGGAACTGCCGATAGAAGCTTCGTGTGAGAGGGGATCCAATGGCTCGCTAGATGTCAGCT…
219	Chr01	17612659	17903297	CGAGGAGGGTAGTAGGGTTGGCGGCCACTTGCAGT	C	34	ATGGGCATGGGCAACACCGAAAGGACGAGGACGGGGGCAGCGAGAGGACGGATCCTTACCACCATGCAACGAGGCGCGAAACGACGACGACGAGCGGGCGCGGTTGAGACGGCTCGGGGACGGCGGAGACGAATGGCGAGGGGACTACTTCGGCGGCGATCCTTGGACGAAGACGAGACGAGGTCGGCACAAGGCTTGACGACGCGGAGCCGAGGACGAAGACGACGACGGGGCTGCAGCGGCTCACTTGACGGACGCGGACGATGAACGAGCACGGCTTGACGAAGGGAGGGCCGACGACGAGCGCAACCGGGAACGACGAGAGGACGACGACAAAGACCGGCGGGGTTCGGATGGAGGGGAGGCGAGGCCGAGGACGACCTTGCCGCTGTGATGCCG…	AATGGGCATGGGCAACACCGAAAGGACGAGGACGGGGGCAGCGAGAGGACGGATCCTTACCACCATGCAACGAGGCGCGAAACGACAACGACGAGCGGGCGCGGTTGAGACGGCTCGGGGACGGTGGAGACGAACGCGAGGGGACTACTTTGGCGGCGATCCTTGGACGAAGACGAGACGAGGCCGGCACAAGGCTTGACGATGCGGAGCCGAGGACGAAGATGACGACGGGGCTGCAGTGGCTCACTTGACGGACGCGGACGACGAACGAGCACAGCTTGACGAAGGGAGGGCCGACAACGAGCGCAACCGGGAACGACAAGAGGACGACGACAAAGACCGGCGGGGTTCGGATGGAGGGGAGGCGAGGCCGAGGACGACCTTGCCGCTGTGATGCCG…
220	Chr01	17626127	17910456	ACACGATACATTACTGCGAAATTTATAGGTTGT	A	32	TTGCTGAGTATGTCATATACTCACCTTGCAATCATTCATCAGAGGAGGAGTTCTACAGTGATGCCGAAGGTGTGGATGATTAGGCGTAGCCCTGGTCGAGCTGCTTGTGAGATGGAGTCGTCTGCGCCGTTTATCTTATTTTCCGCTGCTTAGATCTTTATTGTTTGAGAGGAACTATCTACCTCTGTAATGACATTATATTCGCTTATTAATTAGAGTAATAATTATACTCTATTATCAATTTGTTATTGTGTGCCTCGGCTGATTCCTAAACGAGGGTTTACACACATGTAAGCGTTTGGAATTTTGGATAGAAATTCCGGGCGTGACAGGCAAGCTCTCCTAACCAATTCACCATATGATATTATATGAATAGAGAACATTATTTGTATGCTTTGT…	TTGCTGAGTATGTCATATACTCACCTTGCAATCATTCATCAGAGGAGGAGTTCTACAGTGATGCCGAAGGTGTGGATGATTAGGCATAGCCCTGGTCGAGCTGCTTGTGGGATGGAGTCGTCTGCGCCGTTTATCTTATTTTCCGCTGCTTAGATCTTTATTGTTTGAGAGGAACTATCTACCTCTGTAATGACATTATATTCGCTTATTAATTAGAGTAATAATTATACTCTATTATCAATTTGTTATTGTGTGCCTCGGCTGATTCCTGGACGAGGGTTTACACATATGTAAGCGTTTGGAATTTTGGATAGAAATTCCGGGCGTGATAGGCAAGCTCTCCTAACCAATTCACCATATGATATTATATGAATAGAGAACATTATTTGTATGCTTTGT…
221	Chr01	17654039	17938187	ATAGTTCAACCCACCGTCGGACAAAAGAGAAAAATCGAACATGCTT	A	45	ACTCGAGGGAGGGGGGCGGGGCGCCGAGGAAGAGGGAGGCGGAGGACGGGAGCGAGGCGTGGAGCTCGTCGGCGAGCGCGATCGCCGCGTAGACGTGGCCCCCCGCGCCGCCGCACGCGAACGCGACGCGGAGTGGGTCGGGGTCGGAGGCGGAGTCGGAGAGGCGGCAGCGGAGGTGGAGGGAGCGGGCGCGGCGGCGCGCGGGAGAGGGGGAGAGGGTGAGGCGTCTGGCGCCGCGGAGGCCGCGAGGTGGATCGTCCGGGCTGTTGTATTGGGTGAAGCGAGGTAGAAGCGGAGACCACGGCAGCGGCAGCGGCAGCGGCCGCGGCGCGGGGCGGGCGGTGGCTGCCATTCCTTCCGGCGACGGCGGAATGGGGGAGCACGAGAGCGAGGGAGGGT…	GCGTCGGACTCGAGGGAGGGGGGCGGGGCGCCGAGGAAGAGGGAGGCGGAGGACGGGAGCGAGGCGTGGAGCTCGTCGGCGAGCGCGATCGCCGCGTAGACGTGGCCCCCCGCGCCGCCGCACGCGAACGCGACGCGGAGTGGGTCGGGGTCGGAGGCGGAGTCGGAGAGGCGGCAGCGGAGGTGGAGGGAGCCGGCGCGGCGGCGCGCGGGAGAGGGGGAGAGGGTGAGGCGTCTGGCGCCGCGGAGGCCGCGAGGTGGATCGTCCGGGCTGTTGTATTGGGTGAAGCGAGGTAGAAGCGGAGACCACGGCAGCGGCAGCGGCCGCGGCGCGGGGCGGGCGGTGGCTGCCATTCCTTCCGGCGACGGCGGAATGGGGGAGCACGAGAGCGAGGGAGGG…
222	Chr01	17766514	18063343	T	TTTAGCTCGTTAAAGATAACGAGTCAGCTCGAGCTGGCTCGTGAGC	45	GACGAGGTGGGAGGGGGAGGAGACGACGGGAGGGGAGGCGGCGGGCGGGGCGGGGAGGAGGCGGCGGGAGAGCGGGTGGAAGGCGAGGCGCGGGGAGAGGAGGAAGAAGGCGTCGAGGCGGTGCGGGGTGAGGAGGGCGTGGAAGGCCCGGGAGCGGAGGAGGCGGCGGAGCGCGCGGGAGGCGGCGGCGACGGGGAGCAGCGCGGTGAGCGGGAGGAGAGAGAGGATCCGCTCCTGGAGGTGCTCCGGGAGGGCGTCCCACGCGCAGGCGGCGGCCATGGATGGATGGATCGCCGGTTTGTTTCCTGCTGCGGCGGAGGGAAGGGAACAAAAAAAAAAAGGGGAAGATTTGTGTTCCTGCCGGAGAATACGGAAATGGGCGGTCATGTGGGGTGGGGC…	GACGAGGTGGGAGGGGGAGGAGACGACGGGAGGGGAGGCGGCGGGCGGGGCGGGGAGGAGGCGGCGGGAGAGCGGGTGGAAGGCGAGGCGCGGGGAGAGGAGGAAGAAGGCGTCGAGGCGGTGCGGGGTGAGGAGGGCGTGGAAGGCCCGGGAGCGGAGGAGGCGGCGGAGCGCGCGGGAGGCGGCGGCGACGGGGAGCAGCGCGGTGAGCGGGAGGAGAGAGAGGATCCGCTCCTGGAGGTGCTCCGGGAGGGCGTCCCACGCGCAGGCGGCGGCCATGGATGGATGGATCGCCGGTTTGTTTCCTGCTGCGGCGGATGGAAGCGAACAAAAAAAAAATGGGGAAGATTTGTGTTCCTGCCGGAGAATACGGAAATGGGCGGTCATGTGGGGTGGGGC…
223	Chr01	17806170	18102412	C	CCCGGGTATTTGAACCGGGACTAAAGATAACGA	32	GTAGGGCCGCGGCTGTGCGGCGGCGGTGGAGCGAGGCGGCCGCACGGCGGCGGCGGAGCGAGGCGGCCGAGCAGAGCAAGGCGGCCATGGGCGGCGGTGGGTGGGGCCGCGGCTGTGCGGCGGCCGCGCGGCAGGCGGCCGTGCGACGGCGGCCGATGGGGCCATGGCCGGCGGCCGACGACAGCAGCAGTCAACATTATTTTTTTATTTGTGATTCACTGTGATGTACTTTTGTATGGACAATATTGTGATTCATTGTACATTTGTATGGATCTGTGATGTATAAGATTTGTGATGTTAGTTTGGTTTGGGGTTTGATTTGGGTATTTGGGGTTTGATTTGGGATATGTATCCCACTTGATTCGAGAGAAAATAAAAAAGAAAAAAAAAAGAAAAGGA…	TCCCCTGGCCCTTCCCCTTCATCCTTCCCCTCTCTGCTCCCCCTTCCTATCCCCGCCTCCTCCTCCTCCTTCCCCTCCTACTGTGGCCGGGCGGCGGCGACGGAGCGAGGTGGCGGCGACGGAGCGAGGCGGCTGCGCGGCGGCGGCTGGTGGGGCCGCGACTGTGCGGCGGCGGCAGACGACAACAGCAGTCAACATTGTTTTTTTATTTGTGATTCACTGTGATGTACTTTTGTATGGACAATATTGTGATTCATTGTACATTTGTATGGATCTGTGATGTATAAGATTTGTGATGTTACTTTGGTTTGGGGTTTGATTTGAGTATTTGGGGTTTGATTTGGGATATGTATCCCACTTGATTCGAGAGAAAATAAAAAAGAAAAAAAAAGAAAAGGA…
224	Chr01	18055484	18348855	GCGCGTGTGTATAAGTTCATAGTATGAGTGTCTGCGTAATGGACACTTGCA	G	50	TGTATCTTTTTAAAATGATAAAATTACCCCATTCATGATAGCTCGAGGCAGACAGTAGAATTTGCATATGATCGATCAATAGATAGCACAGCAGTTGAGCAGTGTCGTTTGCAACTCTATCGATCGAGGAACCAGCCTGCCGGCCCAAAAGGAGACCGAAAAGGAAATTAAATCGTGATTTAATTGTGGCCAGTAAATCGCAGGAGAAAAACTGATCGAGCATGCATGCACATACGCACATATTTAATTTTTTTCAACAAAATAGTACAAACCAGATAGCTACATATAGAAAAATAATCCAATAGGATTTAAATGTATAAAATAATAAAATTTTGTTGTTCCAACCGAGATTTTCTTCCCTCATCATGAGAAAATGAAAATCATGCGAAGTGAGCGTAG…	TGTATCTTTTTAAAATGATAAAATTACCCCATTCATGATAGCTCGAGGCAGACAGTAGAATTTGCATATGATCGATCAATAGATAGCACAGCAGTTGAGCAGTGTCGTTTGCAACTCTATCGATCGAGGAACCAGCCTGCCGGCCCAAAAGGAGACCGAAAAGGAAATTAAATCGTGATTTAATTGTGGCCAGTAAATCGCAGGAGAAAAACTGATCGAGCATGCATGCACATACGCACATATTTAATTTTTTTCAACAAAATAGTACAAACCAGATAGCTACATATAAAAAAATAATCCAATAGGATTTAAATGTATAAAATAATAAAATTTTGTTGTTCCAACCGAGATTTTCTTCCCTCATCATGAGAAAATGAAAATCATGCGAAGTGAGCGTAG…
225	Chr01	18069499	18362897	CTCCGCCGGCCGCCATCCTCGCCATCTCCGCCGCGACCGAC	C	40	CGGCGCGGTGGCCGAGCGCGTCTTTTGCATGATGGCGTTCCACATGGCATCCAAGTCGTCGTCGTCCCTGCCACTGTCGAGGGCGGTTGCTGCCACGCCCGGGAGCGGCAGCGAGAACTCCCGCTCGAGAACGGAGTGTTCCTGCGGCGGCGGTGCAAGGCTCTGCCTCGTGTCGGAGGTGTACGATGCGGCGGTGGACGCGTCCTTGTCGGACTCCGTGGTCACGCAGGACTCGCCGCCGTACACTGCCGCCGCGGTGTTGAACTTCTCCTTGGGCTTGACAACCAGCGACGGCGCATCCTCCGCCGCGGCGGGGAGGACCGCCGCCATCGGAACAGCCGGATGCAAGTGCGGGCATGGATCCTTGAGCTGCTGCTGCTGCACTTGGAAGTGCTTGTG…	CGGCGCGGTGGCCGGGCACGTCTTTTGCATGATGGCGTTCCACATGGCATCCAAGTCGTCGTCGTCCCTGCCACTGTCGAGGGCGGTTGCTGCCACGCCCGGGAGCGGCAGCGAGAACTCCCGCTCGAGAACGGAGTGTTCCTGCGGTGGCGGTGCAAGGCTCTGCCTCGCGTCGGAGGTGTACGATGCGGCGGTGGACGCGTCCTCGTCGGACTCCGTGGTCACGCAGGACTCGCCGCCGTACACTGCTGCCGCGGTGTTGAACTCCTCCTTAGGCTTGACAACCAGCGACGGCGCATCCTCCGCCGCGGCGGGGAGGACCGCCGCCATCGGAACAGCCGGATGCAAGTGCGGGCATGGATCCTTGAGCTGCTGCTGCTGCGCTTGGAAGTGCTTGTG…
226	Chr01	18089620	18387119	C	CTAGTAAAATGCCCGTGCTTTATAACGGAAAGTG	33	TCACTACTAAAACTCTATTGTGATACAAAATTTGATGTAGGAATATAAAGCATGGCCATGAACAACTTAAAAACAGATTTTTAAAAACAAAATCTACAAAATTGATGAAGGAATAATATTTTTATTGTCCCTACCCGTTGTAAAACAAGAGCATCTGTCTTGGGAGAGTCTAATGGGCGGATGATCACGGCGCGCGATTGATCCGAGCCCGACGCGCACACGACTCCCACCCTAGCTCCCATCCCCTCCCACGGTACGATTTGTTAAAAATATATTTTAGACTAATTCAAAATCACCCGCTAATTAGTAAATTCGATCTGGCTTTGTGCATTCCTGACCCGTGTCGATATGATAACCACAATTGATCTCCACATATCCGCCGTTATTCGCCACTATTGT…	TCACTACTAAAACTCTATTGTGATACAAAATTTGATGTAGGAATATAAAGCATGGCCATGAACAACTTAAAAACAGATTTTTAAAAACAAAATCTACAAAATTGATGAAGGAATAATATTTTTATTGTCCCTACCCGTTGTAAAACAAGAGCATCTGTCTTGGGAGAGTCTAATGGGCGGATGATCACGGCGCCCGATTGATCCGAGCCTGACGCGCACACGACTCCCACCCTAGCTCCCATCCCCTTCCACGGTACGATTTGTTAAAAATATATTTTAGACTAATTCAAAATCACCCGCTAATTAGTAAATTCGATCTGGCTTTGTGCATTCCTGACCCGTGTCGATATGATAATCACAATTGATCTCCACATATCCGCCGTTATTCGCCATTATTGT…
227	Chr01	18111352	18389804	GTATATATATATATATATATATATATTATATTA	G	32	ATCAATGGCTTTCTTTCTTTCATTTTAATGCCTGACTTTATCTTTATTTTCATTAGAAACGAACACCGTTCTTTTTAACTATGATTTCTGCTTCACCTTTTTTAATTGTAATAACAAGTGCTCTAATCCTAGTAGGTAAGTGAGATTTATGATTCCTATGAGGCTAGGATTAGATACTCAGAAAATCCATAGAGCTTTTGTACACAATGAAGGGATATCAGGGGGTATAATGAGAACATATCAAGTTATATCTTAAGCTGGACAGATGCAGGTGATACACAATACCTAGGCTCATACGTTTCAACAAAGAAATAATTTTCTAGCGATCCACCCCTCCGCCTCCATGTTACTCTACAAGTCTAAATGCCCTCTGCTTGAATCTAATAAATGACTTTGTGG…	ATCAATGGCTTTCTTTCTTTCATTTTAATGCCTGACTTTATCTTTATTTTCATTAGAAACGAACACAGTTCTTTTTAACTATGATTTCTGCTTCACCTTTTTTAATTGTAATAACAAGTGCTCTAATCCTAGTAGGTAAGTGAGATTTATGATTCCTATGAGGCTAGGATTAGATACTCAGAAAATCCATAGAGCTTTTGTACACAATGAAGGGATATCAGGGGGTATAATGAGAACATATCAAGTTATCTCTTAAGCTGGACAGATGCAGGTGATACACAATACCTAGGCTCATACGTTTCATCAAAGAAATAATTTTCTAGCGATCCACCCCTCCGCCTCCATGTTACTCTACAAGTCTAAATGCCCTCTGCTTGAATCTAATAAATGACTTTGTGG…
228	Chr01	18113191	18391598	T	TGCAAGAGCACTGGCACCTAAGCAGCCTGCACATGCAC	37	CAATAACAACAATGTTGCATGCATGTTTTTAAAATATTTTTAGCAAAATTAAGTATTTAATTTGCAAATACACTATATGTTTTATATTATTTTTTATGTTTCACACGTTGATACTTTTTGTTTCATTTAGTGGTTATGATTGTTGTAGCTAATATTTTTTTTATGTTGAATTTATCTGAAACATTTTTATGAGATGAGTTGAAACATATGCACAATTGATGAAACAATTTTTCTATAAATAGTGAAAATGATATTATTTTAGATATTTTTTATCAAAATATTTATCATATAGGTTTAATTATAATGAATATTATGGTGTAATAAAATCATAAATCGGGTTTGTTTTTAGAATATATAAAAACTGGCTTAAAGTTTTCTTAACAAATAGATAAAGATATG…	CAATAACAACTATGTTGCATGCATGTTTTTAAAATATTTTTAGCAAAATTAAGTATTTAATTTGCAAATACACTATATGTTTTATATTATTTTTTATGTTTCACACGTTGATACTTTTTGTTTCATTTAGTGGTTATGATTGTTGTAGCTAATATTTTTTTTATGTTGCATTTATCTGAAACATTTTTATGAGATGAGTTGAAACATATGCACAATTGATGAAACAATTTTTCTATAAATAGTGAAAATGATATTATTTTAGACATTTTTTATCAAAATATTTATCATATAGGTTTAATTATAACGAATATTATGGTGTAATAAAATCATAAATCGGGTTTGTTTTTAGAATATATAAAAACTGGCTTAAAGTTTGCTTAACAAATAGATATAGATATG…
229	Chr01	18142414	18422949	TCAAACGTTAAACACCAAAACTCAAAAATTGAGTCTTTTTTAGACGGA	T	47	GGCAAGATCAAATTAGTCAGGCAACAGTCCAGGCTCTGCCACAGACAATTTCTATTATTGATGGTTAACGACATCCGATCGATCCATATGAAATAGTTGGTCATCAGAAAATGCTACTGTACGATGAGCACCACGCCATTATAACCAACTGTGGTTTTGAAGAGTGATGCTTTTCATGCTATATATTGCCCTCTTTGACCAGATTTAGATAAGTAATATAAGTAGCATTCATTAATCGATTTGTGATATTGGGAAGATGAAAAAGTTTGTGTTGGTTGGAGTATCTATGTTGAAGACACTATTGATGCATCGTACTCTCTCCGTCCCAAAAACAACTCAATTCCTAGATTTCCGTGTCTAACGTTTGACCGTTCGTCTTATTTGAAAAAGTTATGAAAA…	AGGCAAGATCAAATTAGTCAGGCAACAGTCCAGGCTCTGCCACAGACAATTTCTATTATTGATGGTTAACGACATCCGATCGATCCATATGAAATAGTTGGTCATCAGAAAATGATACTGTACGATGAGCACCACGCCATTATAACCAACTGTGGTTTTGAAGAGTGATGCTTTTCATGCTATATATTGCCCTCTTTGACCAGATTTAGATAAGTAATATAAGTAGCATTCATTAATCGATTTGTGATATTGGGAAGATGAAAAAGTTTGTGTTGGTTGGAGTATCTATGTTGAAGACACTATTGATGCATCGTACTCCCTCCGTCCTAAAAAAACTCAATTCCTGGGTTTCCGTGTCTAACGTTTGACCGTTCGTCTTATTTGAAAAAGTTATGAAAA…
230	Chr01	18188999	18469267	G	GTGCCGGTTGGGAACCGGCCTTAGGTGCCGGTT	32	ACACATAGCCCACTTAACTCAACTGCGCAGTGTGCGTACGTCTTGGTCACCTCCTGGGCTCTTTGCCTGTTTCTACAATTTCATGCGCTTGATTGATGGGCCGAGAGCCGCTGCAAATGAGCTTGGGTGCTGGACCATACATGTGCATGCAGTAAATCAAACCCCCACCACTTATACATGGAAAAGGTGAAAAAGTTGGAGGGAAGAAAATAATGTTTCCTTCTCAAATCATAGTCATTTATTGCAACACCTTATCATCGATAATTATACATATAAATAAGACGGAAAGGCATTATGACAATTAAACTGATCAAACACCTCGACTAGATGATTTTATGGGACATTAATTAATCACTAAGGAATGAATACCATAAAAAGCTAGGCAGAACAGCCAGCTAC…	ACACATAGCCCACTTAACTCAACTGCGTAGTGTGCGTACGTCTTGGTCACCTCCTGGGCTCTTTGCCTCTTTCTACAATTTCATGCGCTTGATTGATGGGCCGAGAGCCACTGCAAATGAGCTTGGGTGCTGGACCATACATGTGCATGCAGTCCATCAAACCCCCACCACTTATACATGGAAAAGGTGAAAAAGTTGGAGGGAAGAAAATAATGTTTCCTTCTCAAATCATAGTCATTTATTGCAACACCTTATCATCGATAATTATACATATAAATAAGACGGAAAGGCATTATGACAATTAAACTGATCAAACACCTCGACTAGATGATTTTATGGGACATTAATTAATCACTAAGGAATGAATACCATAAAAAGCTAGGCAGAACAGCCAGCTAC…
231	Chr01	18204342	18497385	G	GTGTTGTACCATACATGTGCATGCAGTCCATCAAATCC	37	CGGATAACATGATATATAAGGTGGGGACAGATATGTGGATAAGGATTGGCTGGACGGTTTTTATGGGTATAGGTGTCAGTTTTTTAATTAACCGGTTTCGATAATATATAATAGGTGTTGGTTCTTTTAAAAAACGGTACCTATAGTATTGGTACCCATTTTTTTGGAACTGGCACATATAGTGCTTAAAGGTGCCGGTACCTATGAATTGATACTTATGTGGGGTTTTGTAGTAGTGATATTCACTTTAGGGGGCATGCTTCTGTTCGTTGGTGTCACTCCACTGCCGCTGGCCATCCGATCTCGTGGCCTGGCTCACTTCTCACTCCTGCGAAATCAGCCGTCAGGTGGCTGCCACCCGATGTTCAGCAGGCAACACACATAGTCCACTTAGCTCAA…	GGATAACATGATATATAAGGTGAGGACAGATATGTGGATAAGGATTGGCTGGACGGTTTTTATGGGTATAGGTGTTAGTTTTTTAATTAACCGGTTTCGATAATATATAATAGGTGTTGGTTCTTTTAAAAAACGGTACCTATAGTATTGGTACCCATTTTTTTTGGAACTGGCACATATAGTGCTTAAAGGTGCCGGTACCTATGAATTGATACTTATGTGGGGTTTTGTAGTAGTGATATTCACTTTAGGGGGCATGCTTCTGTTCGTTGGTGTCACTCCACTGCCGCTGGCCATCCGATCTCGTGGCCTGGCTCACTTCTCACTCCTGCGAAATCAGCCGTCAGGTGGCTGCCACCCGATGTTCAGCAGGCAACACACATAGTCCACTTAGCTCAA…
232	Chr01	18254130	18547147	GATGCTGGATCCCCTCATCAGTGTAGCAGGCAGTG	G	34	CATAGGATGCTTGGTGGTGTTCTCAACATGGTACTCGATGGCGAAATCACTGCTTGGTGGCACACTTGTGCCGCTTCTTGTCGTTTGATCCCACCCGTGGCTCTCGTCAAAGATGACATTTCAAGTGAGACATACACGCGTATCCTTGGATCAAGGACACGATACGCCTTCATCCCTTCTTCGTAGCCGATGAAGAAGTCGGGTATGCTGCGCTCGTCGAGCTTGCGTGCATTGTTTAGCTCCTTCACAAACACCAGGCACTCGAAGGTGCGCTGGAAGTTGACAGTCGGCTTCTTACCGTGCTTTGCTTCACATGGCATATTGCCGATAAGGCTCTTGGTTGGCATGTGATTGAGGAAGACAGTCGTGCTGACAGCCTTCCCCCAAAACTCAATAGAC…	CATAGTATGCTTGGTGGTGTTCTCAACATGGTACTCGATGGCGAAATCACTGCTTGGTGGCACACTTGTGCCGCTTCTTGTCGTTTGATCCCACCCGTGGCTCTCGTCAAAGATGACATTTCAAGTGAGACATACACGCGTATCCTTGGATCAAGGACACGATACGCCTTCATCCCTTCTTCGTAGCCGATGAAGAAGTCGGGTATGCTGCGCTCGTCGAGCTTGCGTGCATTGTTTAGCTCCTTCACAAACACCAGGCACTCGAAGGTGCGCTGGAAGTTGACAGTCGGCTTCTTACCGTGCTTTGCTTCACATGGCATATTGCCGATAAGGCTCTTGGTTGGCATGTGATTGAGGAAGACAGTCGTGCTGACAGCCTTCCCCCAAAACTCAATAGAC…
233	Chr01	18265628	18558609	T	TAATATATGCATATATATATATATATATATATATATAT	37	AAGAGTAATATGGTTTTTTAAAACAATCATTTTATAACTTTTTTTTTAAAAAAAAAATATGCCGTTAGCGGTTCGGAAAGGGTGCGCATGGAAAATAAACTTGAGATAAGGGACTTCTAAATGAAGTCTAAAATATGAGTACAACCAAACAACTTCTAAATTTTAGAATATTACTTTATCAAAATTTTGGCAATGCTATAACATCTATTTATATCACTGGTGGAGAAAGCGTTTGTAGTCCCGGTTCGTAACCTCCCTTTAGTCCCGGTTTCCAAACCGGGACTACCAATCCGGGACTAAAGATCGCTATCTTTAGTCCCGGGTGAAATAACCGGGACTAGCCACGTGGCCGGCTGAGCCATCTTTACTCCCGGTTGGTGTTACCAACCGGGACTAAAG…	AAAGAGTAATATGGTTTTTTAAAACAATCATTTTATAACTTTTTTTTAAAAAAATATGCCGTTAGCGGTTCGGAAAGTGTGCGCATGGAAAATAAACTTGAGATAAGGGACTTCTAAATGAAGTCTAAAATATGAGTACAACCAAACAACTTCTAAATTTTAGAATATTACTTTATCAAAATTTTGGCAATGCTATAACATCTATTTATATCACTGGTGGAGAAAGTGTTTGTAGTCCCGGTTCGTAACCTATCTTTAGTCCCGGTTTCCAAACCGGGACTACCAATCCGGGACTAAAGATCGCTATCTTTAGTCCCGGGTAAAATAACCGGGACTAGCCACGTGGCCGGCTGAGCCATCTTTACTCCCGGTTGGTGTTACCAACCGGGACTAAAGATC…
234	Chr01	18318752	18598469	G	GTAGTTCTCAAGGTTTTAGGGTTGAACCATCACAAAC	36	AAGCTATATTCCAGCTAACTTGTCAAACAACTGCTCTGATCCTAGTTTACTAATTTATAATGTGCCGTTGCCACTAACAATATTGTAATGATGATTTGGTATTTTGAAATAATAGTATAAGTGCACACCAGGCAGGTAATAGCACTAAGCCTGCAGCTCTGCATCCTTAGTTGGTACTCCCTCCGTCCCAAAATATAACAACTTTTAGCCCTTAGGAGTTGTCCCAAAATATAACAACTTCTCCCCCAACATTCTCTTCCCAACCAATCACAACCCTCCACCATTCACTTTTCCCACCTACCTCCACTACTCATCCAATCACAACCCTCCACCATTCACTTCTACCTACTTTCTTAATAACCATGTCTAACTCTAAAACTTCTTATATTCTGGGACGGA…	GCTATATTCCAGCTAACTTGTCAAACAACTGCTCTGATCCTAGTTTACTAATTTATAATGTGCCGCATTGCCACTAACAATATTGTAATGATGATTTGGTATTTTGAAATAATAGCATAAGTGCACACCAGGCAGGTAATAGCACTAAGCCTGCAGCTCTGCATCCTTAGTTGGTACTCCCTCCGTCCCAAAATATAACAACTTTTAGCCCTTAGGAGTTGTCCCAAAATATAACAACTTCTCCCCCAACATTCTCTTCCCAACCAATCACAACCCTCCACCATTCACTTTTCCCACCTACCTCCACTACTCATCCAATCACAACCCTCCACCATTCACTTCTACCTACTTTCTTAATAACCATGTCTAACTCTAAAACTTCTTATATTCTGGGACGGA…
235	Chr01	18614898	18901491	TTTGATGTTAAGTGTGCTTGGTCTGGAGCTTTAGAACTT	T	38	GTATGAAGAAATGACCAAAATAAAAGTTTTAGATCTTGATGAGTTATTCAACTTTGTTGTTGATGACTTTTTCAGTTGATATCATTTATTATTTGAAAATGTTGTTTGAAGTTGTCATATTTTCAAATTCAAATTAAACTGTTAAAAAATGTTATATTGAAAAATGACCAAACTAAAAGTTGTAAATATTGATAAGTTATACAACTTTGTTGTTGATGACTTTTTCTGTTGAAGTCTTTCATTGATCTAAAATTCTATTTGAACTTTTCAAACTTTGAATTTCAAATTTCAAATTGTTTAAATAGAGTCAGATAGAGAAATGATCAAAATAAAAATTTTGCATCTCGATGAGTTCTACAACTTTGGTTTTGGTGACTTGTCCATTTGAAATCATTTAAT…	ATGAAGAAATGACCAAAATAAAAGTTTTAGATCTTGATGAGTTATTCAACTTTGTTGTTGATGACTTTTTCAGTTGATATCATTTATTATTTGAAAATATTGTTTGAAGTTGTCATATTTTCAAATTCAAATTCAAACTGTTAAAAAAATGTTATATTGAAAAATGACCAAACTAAAAGTTGTAAATATTGATAAGTTATACAACTTTGTTGTTGATGACTTTTTCTGTTGAAGTCGTTCATTGATCTAAAATTCTATTTGAACTTTTCAAACTTTGAATTTCAAATTTGAAATTGTTTAAATAGAGTCAGATAGAGAAATTATCAAAATAAAAATTTTGCATCTCGATGAGTTCTACAACTTTGGTTTTGGTGACTTGTCCATTTGAAATCATTTAAT…
236	Chr01	18647050	18933200	C	CTTTAGTCCCGGTTAGTAACACCAACCGGGACTAAAAACCTATT	43	ATTATAATACCGGATATCTTGACCCTCTAACTACTAAAATCGGTGTAATTTAACTCTCTCGATAGCTTTGGAGAATGATTTCGCTGACGTAGTGTCTATGTGCCAGTATTGACTTGGCTTTATGATATTGACATGACGCTTAGGTGGCACTACAATTAAAATGGGACGTATTTGTCATTAAAAAAATGTGGGGCCCACTGGCATGTGGCCCCCTTGTCATCCTCTCCTCGATCCTTCTTCCTCCTCGCTCTCTCCCCACTGGTAGAGAAACCATCTTTGGTCGGTCGACCCATATCCACAATAGTCCCGGTTCCATTAAAAACCGGGACTAAAAATGATTTTTAGTCCCGGTTAATAAGAGGAAGATCTTTAGTCCCGGTTGTTGTTACCAACCGGGAC…	ATTATAATACCGGATATCTTGACCCTCTAACTACTAAAATCGGTGTAATTTAACTCTCTCGATAGCTTTGGAGAATGATTTCGCTGACGTAGTGTCTATGTGCCAGTATTGACTTGGCTTTATGATATTGACATGACGCTTAGGTGGCACTACAATTAAAATGGGACGTATTTGTCATTAAAAAAATGTGGGGCCCACTGGCATGTGGCCCCCTTGTCATCCTCTCCTCGATCCTTCTTCCTCCTCGCTCTCTCCCCACTGGTAGAGAAACCATCTTTGGTCGGTCGACCCATATCCACAATAGTCCCGGTTCCATTAAAAACCGGGACTAAAAATGATTTTTAGTCCCGGTTAATAAGAGGAAGATCTTTAGTCCCGGTTGTTGTTACCAACCGGGAC…
237	Chr01	18648036	18934230	C	CCCTCTCCTTCACCTTCCGCCGCATGGGGCAGCACGTGGATCTCA	44	TTTGTGTGAGATGTGAATCTGTGATGAATTTTTTAGAACCCTGTGATGTAATTTTTTTAAGAGTTTGTGATGTATTTGGAGATGATTTGTTTGAGGATTTGGAGATGTTATGTAATATGTGATGATTTGGATATGGGAGGGGACGGTGTGAAATCAATATTCAATATTAAAAGCAGAAAAAAAAGAAAAAATATCTTTAGTCCCGGTTGGTGTTATCAACCGGGACTAAAGATGCTCCCATCTTTAGTCCCGGTTGGTAACATCAACCGGGACTAAAGATTGATTTTTAGTCCCGATTATTTGAACCGGGACTAAAGATAGCGATCTTTAGTCCCGGATTCGTAGTCCCGGTTGGAAAACCGGGACTATAGAGGGTTACGAACCGGGACTAAAAAGCAT…	TTGTGTGAGATGTGAATCTGTGATGAATTTTTTAGAACCCTGTGATGTAATTTTTTTAAGAGTTTGTGATGTATTTGGAGATGATTTGTTTGAGGATTTGGAGATGTTATGTAATATGTGATGATTTGGATATGGGAGGGGACGGTGTGAAATCAATATTCAATATTAAAAGCAGAAAAAAAAAGAAAAAATATCTTTAGTCCCGGTTGGTGTTATCAACCGGGACTAAAGATGCTCCCATCTTTAGTCCCGGTTGGTAACATCAACCGGGACTAAAGATTGATTTTTAGTTCCGGTTATTTGAACCGGGACTAAAGATAGCGATCTTTAGTCCCGGATTCGTAGTCCCGGTTAGAAAACCGGGACTACAGGGGGTTACGAACCGGGACTAAAAAGCAT…
238	Chr01	18722702	18994341	A	AGTGCAAAGATAAGGGAGCATAATTATTGGGCCAAC	35	ACCACCATGAAGTATTGTTCTTCCATAGTAGTGAGTCTTCGTTCCAAGATGGAAAGTGAAGAAAACAGAAGCTAATTGAAGTTGCATTATTACAAACTCTCCCAAGGCTCTGCCAAATCCTTTCTCCAAGCCAACCTCTATCATCATAGGGAGGACGAGCAACATTCCAAGTTGGAAAATAGATTGAGTTGCAAGTGCATTTTCAAAGGGCTTGATGTTCTTAATTTGTGGATCCTGGAGAATTGACTTCTCTAGGCCACTCAAAACAAGATATAACCTCCCGTATAAAAATACATACACTGTAAGAACAGCCACCTGAAAGTAATCAAAGCCATAAAATGCGTTAGCACACTTTGTACAAAAGTACAAACCTTATGTCACATTTTTTAGTTCTTTATA…	ACCACCATGAAGTATTGTTCTTCCATAGTAGTGAGTCTTCGTTCCAAGATGGAAAGTGAAGAAAACAGAAGCTAATTGAAGTTGCATTATTACAAACTCTCCCAAGGCTCTGCCAAATCCTTTCTCCAAGCCAACCTCTATCATCATAGGGAGGACGAGCAACATTCCAAGTTGGAAAATAGATTGAGTTGCAAGTGCATTTTCAAAGGGCTTGATGTTCTTAATTTGTGGATCCTGGAGAATTGACTTCTCTAGGCCACTCAAAACAAGATATAACCTCCCGTATAAAAATACATACACTGTAAGAACAGCCACCTGAAAGTAATCAAAGCCATAAAATGCGTTAGCACACTTTGTACAAAAGTACAAACCTTATGTCACATTTTTTAGTTCTTTATA…
239	Chr01	18776236	19058491	T	TGGCGCTCGTGATGGTGTAGCTGTACGCGCCGCC	33	CCGCAAGCAGTTTAATTACACGGAAGGGGAACTGATAAGAGTATTGTCCCGATCGATCATCTTCCAACCCTTTGGATGCTTGATGACGACACCAAACCATCAAAGCAACACAAAGGCTGGGGATCCATCTGTATCTCGTCGTCGTTGTCCAAGGAGACGAGGCAGGTCGGGAGCATGGCGGTGCGGTGGCGCAGCTCGGCGAAGAAGAAGCGCGGAGCAGCCTGATCATCGGCGCCGGCGGCGGCCCTGGCGAAGAAGTTGACGTCGTAGTAGAAGGCGTCCCAGCAGTCCATGAAGTCGCTCGCCGTGGCGGTGGCGGCGACGAGCTCGTACTTGACCTCGTTGGCGGCGTCGCCGTTGTAGTGCTGCAGCGCGCACTCCGCGAGGGACTCCGCCTGC…	AATTACACGGAAGGGGAACTGATAAGAGTATTGTCCCGATCGATCATCTTCCAACCCTTTGGATGCTTGATGACGACACCAAACGGCACGTCATCAAAGCAACACAAAGGCTGGGGATCCATCTGTATCTCGTCGTCGTTGTCCAAGGAGACGAGGCAGATCGGGAGCATGGCGGTGCGGTGGCGCAGCTCGGCGAAGAAGAAGCGCGGAGCAGCCTGATCATCGGCGCCGGCGGCGGCCCTGGCGAAGAAGTTGACGTGGTAGTAGAAGGCGTCCCAGCAGTCCATGAAGTCGCTCGCCGTGGCGGTGGCGGTGGCGGCGACGAGCTCGTACTTGACCTCGTTGGCGGCGTCGCCGTTGTAGTGCTGCAGCGCGCACTCGGCGAGGGACTCCGCCTGC…
240	Chr01	18826566	19093609	T	TTATTTTGCATGATAAAGTTTCAACACCATC	30	CGGAGATGGAGAACTTCTCGTCGTCCTCGTCGCCTTTGAACACCGGGTGGATGTAGGCATTCATCAGGTATCCTTTGAGGTCGAACCCTGGCTCTCTTGCGCGTTCTAGGGTATCCTTCCGCATTGCATCCTGGAAAAGGGAATGATGAGACGTTATTGGTTGATTTCAGTTTGAAGGTTGAATTCCACAGTTTCTCTAATTCACAAGATGCACATTCTCCTTTTGACATAGAACTGACAATGTCCAAAATAAAATATAGAAGCTTCAATTCTATCCAAGTTATGGCTCCCATCGGATGGCCTATTCAGCCAAAGAAAAAGCCAAAATTTGAATTTTCAAACTTAATTTTGACATTGATTTTAAGATATTTTCAACGTAGTTTCTTTTTCAACATTGGC…	TCGTCCTCGTCGCCTTTGAACACCGGGTGGATGTAGGCATTCATCAGGTATCCTTTGAGGTCGAACCCTGGCTCTCTTGCGCGTTCTAGGGTATCCTTCCGCATTGCATCCTGGAAAAGGGAATGATGAGACGTTATTGGTTGATTTCAGTTTGAAGGTTGAATTCCACAGTTTCTCTAATTCACAAGATGCACATTCTCCTTTTGACATAGAACTGACAATGTCCAAAATAAAATATAGAAGCTTCAATTCTATCCAAGTTATGGCTCCCATCGGATGGCCTATTCAGCTAAAGAAAAAGCCAAAATTTGAATTTTCAAACTTAATTTTGACATTGATTTTAAGATATTTTCAACGTAGTTTCTTTTTCAACATTGGCTTTTAAGTCACCGAGAACAC…
241	Chr01	18840254	19107384	T	TACTTTATTTACGCCCATAATCATCCGCAATCTAACATTTTCATTGTTAGGCTA	53	AACATCATTTATATTAGCAAATGTCCATTTTGCCCTTAATTTATATATACTAGAAAGAAAAAAATGAATAAAAATTTTATAGATGTAGTACTTTCCATTATCTCAACCTGCATATGGGGGTTGTGTTTTAATGGCTATCGTATACTTATAAGAAAATGTATTATTAAAACTTTTTTAAAAAGCACAATGTAGTTATTGAACGTATGTCTAAAAATTAGGTTTATAGGGGTTCTCGTTATGTAGGCATTTTTTTCTTATACATGTGAAAAGGGGTATAACAGCCATTTAATTAATCAAGAGAGGTGTTGATTAGATTTAGCCATCTGACTTTCTAGGTGGGTTAAAGATGAGTTTAAAGTGAAACAAGAACTTGAAGAAATAAAATAGACGAATTGAAAT…	AATCATCATTTGTATTAGCAAATGTCCATTTTACCCTTAATTTACATATACTAGAAAGAAAAAAATGAATAAAAATTTTATAGATGTAGTACTTTCCATTATCTCAACCTGCATATGGGGGTTGTGTTTTAATGTCTATCGTATACTTATAAGAAAATGTATTATTAAAACTTTTTTAAAAAGCGCAATGTAGTTATTGAACGTATGTCTAAAAATTAGGTTTATAGGGGTTCTCGTTATGTAGGCATTTTTTCTTATACATGTGAAAAGGGGTATAACAGCCATTTAATTAATCAAGAGAGGTGTTGATTAGATTTAGCCATCTGACTTTCTAGGTGGGTTAAAGATGAGTTTAAAGTGAAACAAGAACTTGAAGAAATAAAATAGACGAATTGAAAT…
242	Chr01	18868546	19155942	C	CGTAAGCTGGCTTTCAACCGGCTGCTTTTCAGAATTTTAAGCTCCCTCAAACT	52	GTCCGTCGTGCGGCCGTCGAGTTGCAGAACCTGGATATGGGGTTCAGAACTGGCACTGTGCCACTCGCTGCCCCGGTCGCCGATGCTGAGGGGGCAAAGATCAAGAGCAAGATGAGGAGATACAACATAGTAGTTTGGTGGTGGTTGGGCAGTGGGCACAAGCATGAATCACAAGTGGAGAGTTTGTTGAGATGCCTCAGAAAGGAAGAAGAAAAGTTAGTATTTTCGTAAAACTCTTGAAAGAATTCTCATCAAATGCGCGTGTGCTTGGCTTAAGCCAAGGAGTCATAGGGCCTGATTGGGGAGCTTCTAGCTGCTGCAGCTTCTTCCAGAATCAGAAGCTCCCCCCAAACAGTTCAGCTGCTGCAGCTTCTTCTAGAATCAGAAGCTCCCCCCAAA…	TCCGTCGTGCGGCCGTCGAGTTGCAGAACCTGGATATGGGGTTCAGAACTGGCACTGTGCCACTCGCTCCCCCGGTCGCCGATGCTGAGGGGGCAAAGATCAAGAGCAAGATGAGGAGATACAACATAGTAGTTTGGTGGTGGTTGGGCAGTGGGCACAAGCATGAATCACAAGTGGAGAGTTTGTTGAGATGCCTCAGAAAGGAAGAAGAAAAGTTAGTATTTTCGTAAAACTCTTGAAAGAATTCTCATCAAATGGGCGTGTGCTTGGCTTAAGCCAAGGAGTCATAGGGCCTGATTGGGGGAGCTTCTAGCTGCTGCAGCTTCTTCCAGAATTAGAAGCTCCCCCCAAACAGTCCAGCTGCTGCAGCTTCTTCCAGAATCAGAAGCTCCCCCCAAA…
243	Chr01	18906824	19211029	GTTCTATTTTTCTCAAGGTAACATAAATAAAATCATTCACCAACTT	G	45	CCATTGCTTTGTCATCCAACGTGGCAATTGGAGACCCCTATAGCCAATAACTGTGAGCTCCTCAATTTCCAATGGTGGTGTTAGAAGTATAATATGGTAGTTAGAGATAAGAGTCAAATATAAATTATAGAGATAAGATATATCCTAGAGATAGAATCCTAGAGATAAGATAGAGTCCTAGAGATAGAATCCTAGAGATAAATCTACTCTTACTTGTATTATACTCTAAGTCTTTATCCCCTATGTACTCCTATATATACCCCATGAGAGGGTCGATCCAATATATCAGAAAATACCAAAATACAACATATTAGATTTTCTACAGGTGGTTCAAGATTGTTGAGCAAATCCAGATCGTTTTTCATATTCAAGGTAGCCCGCGCGTATGCGCGGGCACTT…	CAAAGAAAGATGAAGAAATAGAAGATTTCAAATCCAGTCGCAATCGTTCGCTTCGCTCCCGTTACGACTGAGGGGGAATGTTAGAAGTATAATATGGTAGTTAGAGATAAGAGTCAAATACAAATTATAGAGATAAGATATATCCTAGAGATAGAATCCTAGAGATAAGATAGAATCCTAGAGATAGAATCCTAAAGATAAATCTACTCTTATTTCTATTGTACTCCAAGTCTCTATCCCCTATGTACTCCTATATATACCCCATGAGAGGGTCGATCCAATATATCAGAAAATACCAAAATACAACATATTAGATTTTCTACAGGTGGTTCAAGATTGTTGAGCAAATCCAGATCGTTTTTCATATTCAAGGTAGCCCGCGCGTATGCGCGGGCACTT…
244	Chr01	18913467	19217603	TAAACCATGCATATATATGTTTCAATACATATAC	T	33	ATTTTTATGTTTTGTTGAATACTAGACTCTGTCAGCTTAGATATCACCCAATTCTTCTCTTTGTCCCTCCCAAATATTGATGTCTCGTCCATGATAGTCCAATGAGGCACCTCCCCTGTTAAATATGTGATCCGAATTTTGGGCCCACAATATATTCGGATTCCCTATGTTTGTAATCATCTCCTCTATAGTGATTATTGCTGGTCGGCGCCCGTGGTTTTTTCCCGCAAGGGTTTTCCACGTAAAATTCGTGTCTCCGTTGTGCATCTATTTTCATAACAAGTGGTTTCAGAGCATTGGAGATCGATTTTACACGTCACTGGTGGAGAAACCCTTTGTAGTCCCGGTTTGTAACCCCCTTTAGTCCCGGTTTCCAAACCGGGAGTACCAATCCGGGAC…	ACAATTTTTATGTTTTGTTGAATACTAGACTCTGTCAGCTTAGATATCACCCAATTCTTCTCTTTGTCCCTCCCAAATATTGATGTCTCGTCCATGATAGTCCAATGAGGCACCTCCCCTGTTAAATATGTGATTCGAATTTTGGGCCCACAATATATTCGGATTCCCTATGTTTGTAATCATCTCCTCTATAGTGATTATTGCCGGTCGGCGCCCGTGGTTTTTTCCCGCAAGGGTTTTCCACGTAAAATTCGTGTCTCCGTTGTGCATCTATTTTCATAACAAGTGGTATCAGAGCATTGGAGATCGATTTTACACGTCACTGGTGGAGAAACCCTTTGTAGTCCCGGTTTGTAACCCCCTTTAGTCCCGGTTTCCAAACCGGGAGTACCAATCCGG…
245	Chr01	18939291	19232900	T	TGGTTCCCGGTTGGTGTTACCAACCGGGACTAAAGA	35	AACTATTTTATAAAACCTTGTTTAGCAAATGAACTAAATTTCTATATATTCTTTCTTCCCCACACACATTTTCTCTCTCATCAACTTACAACTAAGTTTTGGAGACAAAAAAAGTGTGCAAAACATAGGTGCAAATGTAGTATGACAAAAAAAAACATTGGAGGATGAAGTTGCAAACCTTTTAGGCACCTCCGATTTGTATGTAATCACCAAAATAAATTCAATAGAAATTTTGGCATGACCTCCCCTCTTTTTTGAAGATATTTTGAAGCTTGCTCGGGCAGCTGGAGGAGGAAGAAGACATAATATAGGGGTGGGACTTTAGTCCCGGTTGGTAGCACCAACCGGGGCTAAAGATCACCGGGATCTTTTAGTCCCGGTTGGTATTACCAACCGGGA…	TTTTCCTTCTCAACTATTTTATAAAACCTTGTTTAGCAAATGAACTAAATTTCTATATATTCTTTCTTCCCCACACACATTTTCTCTCTCATCAACTTACAACTAAGTTTTGGAGACAACAAAAGTGTGCAAAACATAGGTGCAAATGTAGTATGACAAAAAAAAACATTGGAGGATGAAGTTGCAAACCTTTTAGGCACCTCCGATTTGTATGTAATCACCAAAATAAATTCAATAGAAATTTTGGCATGACCTCCCCTCTTTTTTGAAGATATTTTGAAGCTTGCTCGGGCAGCTGGAGGAGGAAGAAGACATAATATAGGGGTGGGACTTTAGTCCCGGTTGGTGGGGCTAAAGATCACCGGGATCTTTAGTCCCGGTTGGTATTACCAACCGGGA…
246	Chr01	18950066	19243706	A	ACATTTGCTAGACGATAAGTTCTTGCCAAAAGTGGCCTGTAAAAA	44	GGATTAAGCTTAGAACGGGAAGGCACTCCCAAAGAGACCGCAGAACGCCGAAGCAATCGCAACCACACACAATCTCCAGTATGGAAGACCAAGTCACGGTGCTTGGCGTCATAGTATTTCTTATAAACCTGTTGAGCTTGTTCCAATCGATCACGAATATCAGCCAAAAAATCATCCCAATTACACATAACTGATCTAGGGCCGCCACCTTGGCTGTACCTGGCTCATATGATTGAATTGTTGGGTGATCCCTGCCATAGACAACTTTGAAAGGTGTCTCCTTCAGCGATGACTGAACGGAAGTATTGTAACAAAATTCTGCCCACGGAAGCGACTGAAGCCACTTGTGAGGACGATCACCAACTAAACAACGTCGATACATAGCAATTGCCTTGTTTA…	GGATTAAGCTTAGAACGGGAAGGCACTCCCAGAGAGACCGCAGAACGCCGAAGCAATCGCAACCACACACAATCTCCAGTATGGAAGACCAAGTCACGGTGCTTGGCGTCATAGTATTTCTTATAAACCTGTTGAGCTTGTTCCAATCGATCACGAATATCAGCCAAAAAATCATCCCAATTACACATAACTGATCTAGGGCCGCCACCTTGGCTGTACCTGGCTCATATGATTGAATTGTTGGGTGATCCCTGCCATAGACAACTTTGAAAGGTGTCTCCTTCAGCGATGACTGAACGGAAGTATTGTAACAAAATTCTGCCCACGGAAGCGACTGAAGCCACTTGCGAGGACGATCACCAACTAAACAACGTCGATACATAGCAATTGCCTTGTTTA…
247	Chr01	19110532	19679938	ATCTATCTATCTATCTATCTATCTATCTATCTATCTATCTATCT	A	43	GATATTATTGTTTAGATTGACAGAGGTTATTAATAGCCACCCATCTAACGAGAGGTTGAAGCCCTCCTATGAATCATCATAGGAGGGCTTCAAAAGATGCGTAATTAATGGACGAACAACACGCACGTCGATGTCGAAAGGGCGAACAGCACGACGGCCAGTAGCGGATCTACAAGTTCCCTTGACGGCTGCTGGTGTCGTAGCCTCCACAAAAAGAAGTAAATAAATTAGACAATTATTAAGTGATAATACATTGGTTAATGCGGTGGAGCCTGGGCACCTGCCTGTGGTGGCCGCCACTGAGGAACGGACGATGAGAGCAGCATGATTAGAGCAGATACAATAGCAGACTATTAGCCAGTTATAAACATATTTTAATGATATAAAAGATGAGAGAAG…	TGAATCAAGAAGAGCTTAAACATCTAAAATGGGACACACACACATCTATATCCCTATCTCCACTATTCAAAAGGTGCGTGGATGCATCGCTTGTGTTGATAATTAATGGACGAACAACACGCACGTCGATGTCGAAAGGGCGAACAGCACGACGGCCAGTAGCGGATCTACAAGTTCCCTTGACGGCTGCTGGTGTCGTAGCCTCCACAAAAAGAAGTAAATAAATTAGACAATTATTAAGTGATAATACATTGGTTAATGCGGTGGAGCCTGGGCACCTGCCTGTGGTGGCCGCCACTGAGGAACGGACGATGAGAGCAGCATGATTAGAGCAGATACAATAGTAGACTATTAGCCAATTATAAACATATTTTAATGATATGAAAGATGAAAGAGAAG…
248	Chr01	19112633	19682014	TATATATATATATATATATATATATATATATATATATATATATATAT	T	46	TCCACGCTAATTAATACTACAGCAAATATACCAACATCGGCTATTCACTTTTAGTTGTAATGTAAGTAAAGAGCAACACTCAGGAGTTATTTTACACTAACAACAATGTAATATGTGGAGATTAATCAAGTGCAGGCAGACAACGGCAATAGTTTCAGAATTGTTAAATCATGAAAAGATATAATCCGGACTCCAAAGTGAGTGCACCACGCTAATTATTAATTATGAATTTCAAAATGATTAAATCATTAATAATTAAAATTAAAACTAGAATCTTTGTGCAACATTTGGAATTACTGAATCATGAAAAGAAATTCAGACTCCAGACCTAATACAATTTGGTACAAATACTTATTAATTCATCTTTTTAAAAATCATGAGTATAACAATAGGACAAAC…	TCCACGCTAATTAATACTACAGCAAATATACCAACATCGGCTATTCACTTTTAGTTGTAATGTAAGTAAAGAGCAACACTCAGGAGTTATTTTACACTAACAACAATGTAATATGTGGAGATTAATCAAGTGCAGGCAGACAACGGCAATAGTTTCAGAATTGTTAAATCATGAAAAGATATAATCCGGACTCCAAAGTGAGTGCACCACGCTAATTATTAATTATGAATTTCAAAATGATTAAATCATTAATAATTAAAATTAAAACTAGAATCTTTGTGCAACATTTGGAATTACTGAATCATGAAAAGAAATTCAGACTCCAGACCTAATACAATTTGGTACAAATACTTATTAATTCATCTTTTTAAAAATCATGAGTATAACAATAGGACAAAC…
249	Chr01	19162781	19757644	A	ATATATATATATATATATATATATATATATATATATATATATA	42	AGGGCTGCGACGCGTCGATCCTGCTAGACAGCAGTGCGACGATCACGAGCGAGAAGCGGTCGAACCCTAACCGGGACTCTGCGAGGGGGTTCGAGGTGATCGACGAAATCAAGGCGACGTTGGAGGCCGCTTGCCCACACACCGTCTCTTGCGCTGACATCCTTGCCCTCGCCGCGCGTGACTCCACCGTCATGGTATTTTCTAGACATCCCTATTACATTTTCTTTTCATATTCGAATAGTTAGGTTAATTGCTTTTATGAATGTAGTGCATATATATGTTGAGAATATATGCTTTTGCATTGTCTAAAAAGCTTGCCGCGGATTTGGATTGACTGCAACTTGTTGTGTGTACGTATAATATGCATCATGTCGGACTTAGTCAGCCAGTAAGCTAAGC…	CTGCGACGCGTCGATCCTACTAGACAGCAGTGCGACGATCATGAGCGAGAAGCGGTCGAACCCTAACCGGGACTCTGCGAGGGGGTTCGAGGTGATCGACGAAATCAAGGCGGCGTTGGAGGCCGCTTGCCCACACACCGTCTCTTGCGCTGACATCCTTGCCCTCGCCGCGCGTGACTCCACCGTCATGGTATATATACATTTTCTAGACCTCCCTATTACATTTTCTTTTCATATTCGAATAGTTAGGTTAATTGCTTTTATGAATGTAGTGCATATGTTGAGAATATATGCTTTTGCATTATCTAAAAAGCTAGCCGCGGATTTGGATTGACTGCAACTTGTTGTGTGTACGTATAATATGCATCATGTCGGACTTGGTCAGCCAGTAAGCTAAGC…
250	Chr01	19289625	19903177	TGCGATTGTATCATATAGTATCTGTTCGTCATC	T	32	GGAACTGTTCTGCCATTTTCTTTAGAGTCCACCTTTTCACTATGTTCTCTGTACTCGCAGGAAGGGTGAACGTCTCGAGCATTGTAGTCCACAGCATCTCTTTCTCCAAATCTGGGACAAAGCTGTCGTGATCTCCGCGTGCCCTTGTTCAGCGCCAGTACACCATACTGACAGGCACGTTATCCCTCACAACCCAACCGCTGTGTCGTACGTAATTCTTGGCTGCTTCTGCCGGGGCACTAGGTCGGCTGTCTTCGTCCACCTCAGTTATGATGTGCCGACGCTCTATCTTCTTCGCGGCACCTCGTTGTTCGCGTGCCCTCTTCTGTCCAGCGGAGGGTTGACTTCCACTAGCATCCGCCACCTTGTTCCCCTCCTCAGTACCCTCCTCAGTCCCCT…	AACTGTTCTGCCATTTTCTTTAGAGTCCACCTTTTCATTATGTTCTCTGTACCCGCAGGAAGGGTGAACGTCTCGAGCATTGTGGTCCACAGCATCTCTTTCTCCGAATCTAGGACAAACCTGTCGTGATCTCCGCGTGCCCTTGTTCTGCGCCAGTACACCATACTGACAGGCACGTTATCCCTCACAACCCAACCGTTGTGTCGTACGTAATTCTTGGCTGCTTCTGCCGGGGCACTAGGTCGGCCGTCTTCGTCCACCTCAGTTATGATGTGCCGACCCTCTATATCTTCTTCGCGGCACCTCGTTGTCCGCGTGCCCTCTTCTGTCCAGCGGAGGGTTGACTTCCACTAGCATCCGCTACCTCGTTCCCCTCCTCAGTACCCTCCTCTGTCCCCT…
251	Chr01	19295456	19913113	TATATATATATATATATATATATATATATATATATATATATATAT	T	44	AATAATCAAAAACTCTTGCAACAGTCATACAATAATGACATATCATTATTCATACAATAATTATAAAATAATCCAACAAACAATTCATATTTATTATTTTTAATGTTTTAAACTAATATTAATGTTGTACTTCTTTTAATTTTCAATTTAGTTTGTTTTCTATTTTTCAAAATTAATTTTCATTATATTTTCAACTATGAGAATAAAACTTTTTAAGTACACAAACAAAATTTCTATATATTCTTCTTCCCCACATAAATTTTCTCTCTCATCAACTTATAACAAAGTTTTGGAGAAAAAAAAATGTGTGAAACATAGCTCCAAAAGTAATATAACAAAAAAAAAACATTGGATGATGAAGTTACTAACCTATAGACACCTCCAATTTATATATAATCA…	TAATTAAAAACTCTTTCAACAGTCATACAATAATGACATATCATTATTCATACAATAATTATAAAATAATCCAACAAACAATTCATATTTATTATTTTTAAAGTTTTAAACTAATATTAATGTTGTACTTCTTTTAATTTTCAATTTAGTTTGTTTTCTATTTTTCAAAATTAATTTTCATTATATTTTCAACTATGAGAATAAAACTTTTTAAGTACACAAACAAAATTTCTATATATTCTTCTTCCCCACACAAATTTTCTCTCTCATCAACTTATAACAAAGTTTTGGAGACAAAAAAAATGTGTGAAACATAGCTCCAAAAGTAATATAACAACAAAAAAACATTGGATGATGAAGTTACTAACCTATAGACACCTCCAATTTGTATATAACCAC…
252	Chr01	19298587	19926902	TATATATGACGCACGTTAATTTTATTGTGGTCTGAATATATAT	T	42	TACTCCCTCCGTCCTATAATATAAGGGATTTTGAGTTTTTATTTACAACGTTTGACCACTCATCTTATTTAATTTTTTTAAAATTATTATTTATTTTATTTGTGACTTAATTTATTATCTACAGTACTTTAAGCATAACTTTTTAATTTTTATATTTATAAAAAAATTTAAATAAAATAAGTGGTCAAACGTTCCAATCAAAAACTCAAAAATCGCTTGTACTGTGGAACGGAGGGAATATCATGCATGTTGCTCCGATCGTTTGATCGTACGTGTGTGAGATGTCCTACACTGATCCCTCTATAATCGAAGTCAATCAATCAAATCTCGATCCATAGATTGATTCATCAATCGCGAGCACATGCATGTATGTTTCTAAGTCGATCGATCGTCTCGAAA…	GTATCATGCATGTTGCTCCGATCGTTTGATCGTACGTGTGAGATGTCCTACACTGATCTCTCTATAATCGAATTCAATCAATCAAATCTCGATCCATAGATTGATTCATCAATCGCGAGCACATGCATGTACTCCCTACGTCCTGAAAAAAGGCAAACGGTGGATTCCCGTGCCATCGTTTGCCTGGCCGTCTTATATGAATTTTTCTTATAATTAGTATTTTTATCGTTGTTAGATGATAAAACATGATTAATATTTTATGCGTGACTTATCTTTTTAATTTTTTTCATATTTTTTTCAAATAAGACGGACGATCAAACGTTGGACACGGAAACTAGTGTGTTTGTCTTTTTTAAGGACGGAGGGAGTATGTTTCTATGTCGATCGATCGTCTCGAAA…
253	Chr01	19491445	19950778	G	GACTGGCATAGGGTTATTACTATGAGGCTGTC	31	GCACCAAATAACCATATAGAACACCTATACACCTATGAAAAGGAACCCCCCCTCCCCCCCCCCCAAAGTAAGGAATTACATTCCAATCACATACGAAAACCAAGACCTTCTTGAGGAAGACTGCAGTGGACCTACTCGCGCTCACCAAGGACTCAACCGAAGATTAATAAAACTACCACTATGAGTCCTCGGATGCGTGAGGACTATGGTAGAAAGGTCTAGCCCTATGAAAGAGATGAAGGAGGAACCCAACAACACAACAATCAACCCAAGCCATGATACTTAAGAAGCCCTCTTGAGATCTAGTCTTCGATCAACCAAGAGCCACTAAAGCCAAGCTTCCATACATCTGATCACCATCTTGTTGGAATCCTCAACGAGCCTAGCAGATTGGCCTAA…	AAGCACCAAATATCCATATAGAACACTTATACATCTATGAAAAGGAAACACCCCCCCCCCCAAAGTAAGGAATTACAGTCCAATCACATATGAAAACCAAGACCTTCTTGAGGAAGACTGCAGTGGACCTACTCGCGCTCACCAAGGACTCAACCGAAGATTAATAAAACTACCACTATGAGTCCTCCTCGGATGCGTGAGGACTATGGTAGAAAGGCCTAGCCCTATGAAAGAGATTAAGGAGGAACCCAACAGCACAACAATCAACCCAAGCCATGACACTTAAGAAGCCCTCTTGAGATCTAGTTTTCGATCCACCAAGAGCCACTAAAGCCAAGCTTCCATACATCTGACCACCATCTTGTTGGAATCCTCAACGAGACTAGCAGATTGGCCTAA…
254	Chr01	19497220	19957007	A	ACAAGAGGAGGCCTGATGAGAGAGATCAGGAGCGGTGGGATGAACTAGCTG	50	TCGGGGAGGTGCTTGCTTGCGTGCAGCTCGGAGACCTCGCTGGGGAATCGCGGAGGAAGAATTTTAGGGTGATCTCCACAGTTTCCAGTAGTTTTCGTGAGCGCGTAGAGAGGGAAATGATTCGAGAGGCGGCAGGAGCTTCAAGTTCATCTATGGCGGGAGAGGAATTTTCGCTGAGGCCATCTGGGCTCTCGAAGCCCACGCGCTGTAGCGAGGATTCACAACCCAAGTATTCGGCTCAAGTCTAGAGGAACTAATTGATCACTCGTGGTCCACAAAACAGGTGAAGTGGATCTGGATCCACAAAGGGGAGCGTCTCGATGAGTCAACGCTACTATGCTAGGGTTTCCAACGAAGCGAGAGGAGATCCGGCGATTTGGGGAGAGAGCGAGGCACATC…	TCGGGGAGGTGCTTGCTTGCGTGCAGCTCGGAGACCTCGCTGGGGAATCGCGGAGGAAGAATTTTGGGGTGATCTCCACAGTTTCCAGTAGTTTTCATGAGCGCGTAGAGAGGGAAATGATTCGAGAGGCGGCGGGAGCTTCAAGTTCATCTATGGCGGGAGAGGAATTTTCGCTGAGGCCATCTAGGCTCTCGAAGCCCACACGCTGTAGCGAGGATTCACAACCCAAGTGTTCGGCTCAAGTCTAGAGGAACTAATTGATCACTCGTGGTCCACAAAACAGGTGAAGTGGATCTGGATCCGCAAAGGGGAGCGTCTCGATGAGTCAACGCTACTACGCTAGGGTTTCCAACGAAGCGAGAGGAGATCCGGCGATTTGGGGAGAGAGCGAGGCACATC…
255	Chr01	19515136	19975437	G	GCATTTCAATGATCACCCCTTAGTTTAGAATAA	32	CGAGATGGCCTGCCGCGCCGCCACAGCAGGGGCGGACGGCAACGTCGGCGAAGATCGAGGGCACCTGCCGCCGCATGAGCGACTCTCTTCCACGCCCTGCCGAGAAGCCTCACTGCTGTCGGAGCCCACGCCTGTTGCTCCCATGGTGGTGCTGTGCCTGCGCGCGGCGGCGGCGGCGCCGCTGCAAACATCACGCCGGCGCCCCCCCCCCCCTCGGCTCCAACTTCGGCGCCGGCCCCTGACCCCGCCGCTCCCCCACCTGCGTCCCGATGCCGACGTCCCTGCTGGAGGAAGGCGCCGATCGCGTGCGCCGTGGAGGTGGCCGGCGGTGGCGTAGACGCTGGCTTGTCGGAGCGAGCACCGCGTCGGGATGGTGGGGGAGGAAGAGGGGAAAGAGAG…	GGCCTGCCGCGCCGCCGCAGCAGGGGCGGACGGCAACATCGGCGAAGATCGAGGGCACCTGCCACCGCATGAGCGACTCTCTTCCACGCCCTGCCGAGAAGCCTCACCGCCGTCGGAGCCCACGCCTATTGCTCCCATGGTGGTGCTGTGCCTGCGCGCGGCGGCGGCGCCGCCGTTGCAAACATCACGCCAGCGCCCCCCCCCCCCCCCCCATCGGCTCCAACTTCGGCGCCGGCCCCTGACCCCGCCGCTCCCCCACCTGCGTCCCGATGCCGACATCCCTGCTGGAGGAAGGCGCCGATCGCGTGCGCCATGGAGGTGGCCGGTGGTGGCGTAGACGCTGGCTTGTCGGAGCGAGCACCGCGTCGGGATGGTGGGGGAGGAAGAGGGGAAAGAGAT…
256	Chr01	19551011	20011357	T	TCCGTCCCATAATGTTAAAACCTAGGACTGGATAGGACGTTTC	42	ACAAATTCTAGGCTACATGCTCCACTCATGAACGAAGAGTATAGCAGATTCATTGGTTCCATAAGTTTCTGGTGGCAGTTTATCTGGCAAACACAATTTTGAGCTTTCATCAAATTTACTCTGACAGCTTAGTTGCCAATAGAGTAAGACATGCTGCTTGATGACCATGACTCTTTGCATCACAATGGTAAACAAGGTTTAGAGCACCAGAACCAGGACAGAGCGACTATGCTCAAAGCCTGCAACAGATTGTATAGGTGGGATTGTTTTCCCTGGATTGGAAGCAAGTGACCATACAATGAACTATCCATAGTATGAGCCTCTGTTCCATGTTGTCTTTGTTGCGCAGTCGTATGTGCATGGGTAGTATACAGCAGGTACTTGGTTTTGGACATACAC…	ACAAATTCTAGGCTACATGCTCCACTCATGAACGAAGAGTATAGCAGATTCATTGGTTCCATAAGTTTCTGGTGGCAGTTTATCTGGCAAACACAATTTTGAGCTTTCATCAAATTTACTCTGACAGCTTAGTTGCCAATAGAGTAAGACATGCTGCTTGATGACCATGACTCTTTGCATCACAATGGTAAACAAGGTTTAGAGCACCAGAACCAGGACAGAGCGACTATGCTCAAAGCCTGCAACAGATTGTATAGGTGGGATTGTTTTCCCTGGATTGGAAGCAAGTGACCATACAATGAACTATCCATAGTATGAGCCTCTGTTCCATGTTGTCTTTGTTGCGCAGTCGTATGTGCATGGGTAGTATACAGCAGGTACTTGGTTTTGGACATACAC…
257	Chr01	19562160	20022552	T	TACAGTAACCTACATGTGCTAATGACGGATTAATTAGGCTCAAAAG	45	CCATCGTCGCCACCTTCGCCTTCACCTCCGCTGCTAGGGTTAGGTCGAGAGGACAATGGTTTGGCTCGACCTGGTTCAGCCGATTCGATTGGTTTAGTGATTCAACCAGGGGGCAACTAGGTCTATTAAGTCACAAAAGGGCTTGGAGTATAGAGAGTGGTATGATTCGAAAATTAGCTGATTTATAATCGCATGTTTCTAATTTAATAAATAGTAGTGGTATTTTTCAAAAGCGACGAAGTTATAATGGCATGGATCCAATTAATCCATTCTTTTTTTTTTCACAAAACTATCCTAGCTTTTCTTCAATCTGGTTGTGTTTAGATTCCAACTTTTTCCCTCAAACTTTCAAACTTCCAACTTTTTCGTCACATCAAATGTTTGGACATATGTATGAAA…	CCGCCATCGTCGCCACCTTCGCCTTCACCTCCGCTGCTAGGGTTAGGTCGAGAGGACAATGGTTTGGCTCGACCTGGTTCAGCTGATTCGATTGGTTTAGTGATTCAACCAGGGGGCAACTAGGTCTATTAAGTCACAAAAGGGCTTGGAGTGTAGAGAGTGGTATGATTCGAAAATTAGCTGATTTATAATCGCATGTTTCTAATTTAATGAATAGTAGTGGTATTTTTCAAAAGCGACGAAGTTATAATGGCATGGATCCAATTAATCCATTCTTTTTTTTTTCACAAAACTATCCTAGCTTTTCTTTAATCTGGTTGTTAGATTCCAACTATTTTCCTCAAACTTTCAAACTTCCAACTTTTTCGTCATATCAAATGTTTGGACATATGTATGGAA…
258	Chr01	19607779	20073690	GCACAATATATAATAGAGTTTCAGTGTGATTA	G	31	TATGAGGCCATATTTCACTCGTCTGGGCTGGAGCCCAAGCTGCTCAAGGCCCAGTTCACGCCTGGGTTGTTCTTTTTTTTTTTTTTCCCCAAGGACTGGTTTTTTTGTGCTCAAAGTTGGTGGGGTTGTTAGTTTGAAGTTGCTGACTATGGTCTGGTTTAGTTTTCAATTTTTTTCTTAAAAACATCATATCAAATCTTAGGACATATGTATAGAGCATTAAATATAGATAAAAACAAAAACTAAATTTACAGTTTGTATGAAAATTGCGAGACGAATCTTTTGAGCCTAATTAGTTCATGATTAGCTAAGTGCTACAGTAACCTAAATGTGCTAATGATGGCTTAATTAGGCTCAAAAGATTCGTCTTGCGGTTTCCATGCGAGTTATGAAATTAGT…	ATGAGGCCATATTTCACTCGTCTGGGCTGGAGCCCAAGCTGCTCAAGGCCCAGTTCACGCCTGGGTTGTTCTTTTTTTTTTTTTCCCAAGGACTGGTTTTTTTGTGCTCAAAGTTGGTGGGGTTGTTAGTTTGGAAGTTGCTGACTATGGCCTGGTTTAGTTTTCAAATTTTTTCTTAAAAACATCACACCAAATCTTAGGACATGTGCATAGAGCATTAAATATAGATAAAAATAAAAACTAATTCCACAGTTTGTATGAAAATTGCGATACGAATCTTTTGAGCCTAATTAGTCCATGATTAGCTAAGTGCTACAGTAACTTACATGTGCTAATGATGGCTTAATTAGACTCAAAAGATTCGTCTTGCGGTTTCCATGCGAGTTATGAAATTAGTTT…
259	Chr01	19625994	20090699	C	CGCGGCGGCGTCATATGCGCGGGCGGCGGCCTTGGCGG	37	GAAAAAAAAGTTGGAAGTTTATGTGTATAGGAAAGTTTTGATTTGATGAAAAAGTTGAAAGTTTGAAGAAAAAGCTTAACACAAAATCTTAGAAGTGGTATTGGACGGAGCTCAGGCATCAAGCAAAATACTGTTGACTAACTAATTGGCCCTGCTTGTCAGCGTGTTGGGAGAAGCCACCGCTATGGATTGGAGGTCCAGGTTGAGCCTCGTTAGAGCATCTCCAATAGCCTACCCAAATCATACTCTCCAAATACCTATATAGCCAACTCTCTAATTGATTTAGCAAGTTAAACCCGTTGCTCACTACAACAGCCTCTTCATCCACCCTCTCTATTCTGAGTGTATGACACTGGGACCCGTATGTCAGTCTGTCACACCTTCCTCCCCCTTCACTTT…	GAAAAAAAAAAGTTGGAAGTTTATGTGTATAGGAAAGTTTTGATTTGATGAAAAAGTTGGAAGTTTGAAGAAAAAACTTAACACAAAATCTTAGAAGTGGTATTGGACGGAGCTCAGGCATCAAGCAAAATACTGTTGACTAACTAATTGGCCCTGCTTGTCAGCGTGTTGGGAGAAGCCACCGCTATGGATTGGAGGTCCAGGTTGAGCCTCGTTAGAGCATCTCCAACAACCTACCCAATCATGCTCTCTAATACCTATATAGCCAACTCTCTAATTGATTTAGCAAGTTAAACCCGTTGCTCACTCCAACAGCCTCTTCATCCACCCTCTCTATTCTGAGTGTATGACATTGGGACCCGTATGTCAGTCTGTCACACCTTCCTCCCCCTTCACTTT…
260	Chr01	19681126	20235882	ATATTCTGATCATTTGGATGTTATCTTCTTTCAAGTTGACTACCGA	A	45	CGTTTCTTACCGTACATTTTGTTCCATTATCTTTTTTTTTATTTATTTCACGTTTTATGCTGCTTCCGTTCTCCTGGCAACCCTCATGGATGGACTGATGGACACATGAGTATGATTTTGAGTAGCAGTTCAAGTTTAGTACATGGGAAAAGTGGCTCTTTTCAAATTTGGCTCCGTACCTCACAATATCGTCACTAAGAGCAGGTATATAAGCTAGTTATTAACATATTTTAAGGAGATAAAAAAGAAGAGAGAAGAGTAGCGGGCTATAAATTTGTAGCTAGCTATAGCACGGACTTCAAGACGCAATGCGTGGGACTAGATATCAATAGTGTAGTATGTAACTATCGTATGAATTAGCTATTAAAATAAATATATGATTTGGAGCTAGTAGTTGGC…	CGTTTCTTACCGTACATTTTGTTCCATTATCTTTTTATTTATTTATTTCACGTTTTATGCTGCTTCCGTTCTCCTGGCAACCCTCATGGATGGACTGATGGACACATGGGTATGATTTTGAGTAGCAGTTCAAGTTTAGTACATGGGAAAAGTGGCTCTTTTCAAATTTGGCTCCGTACCTCACAATATCGTCACTAAGAGCAGGTACATAAGCTAGTTATTAACATATTTTAAGGAGATAAAAAAGAAGAGAGAAGAGTAGCGGGTTATAAATTTGTAGCCAGTTATAGCACGGACTTCAAGACGTAATGCGTGAGACTGGATATCAATAGTGTAGTATGTAACTATCGTATGAATTAGCTATTAAAATAAATATATGATTTGGAGCTAGTAGTTGGC…
261	Chr01	19732598	20292393	AAGTTTCTATACAAAAGTTGTTTAAAAAAATCATAAACGGTGCGTTTTTTAC	A	51	TGTCAAAAAATAAGTGGTCGAGTCCCCCGCGTGGTGTAGCACACATGCTGCGATCCAACTCGACGGGCCGTACATGCACGATTGATCCGGAATTCCGGATGCACTGCAAACCACCTTGTTTTTTGCAACGAACGCCAGAGTGATTGACACGTACGATGGTCACTCAGATGGAGCAGCACAAGTGGCCAGCGGGCACGTCTCTCGCTGTCTCGCAACGGAGCGCACCATCGGCTGCGCTGCGTGCGTAGTGCGTGTGCGGCGCGTCATCCGTGCCGTGGAGGCGAAAGCGAGTGAGAGCCGAGGGCCCGAGGCACATCAGAGTGCGCGGGGCGGGGGTGGGGACTCCGCTCTCTCTATCGGAGGGACGTGCGGGCGGGGACGGACGGACGGAGGGAGGCA…	AAAAATAAGTGGTTCGAGTCCCCCGCGTGGTGTAGCACACATGCTGCGATCCAACTCGACGGGCCGTACATGCACGATTGATCCGGAATTCCGGATGCACTGCAAACCACCTTGTTTTTTGCAACGAACGCCAGAGTGATTGACACGTACGATGGTCACTCAGATGGAGCAGCACAAGTGGCCAGCGGGCACGTCTCTCGCTGTCTCGCAACGGAGCGCACCATCGGCTGCGCTGCGTGCGTAGTGCGTGTGCGGCGCGTCATCCGTGCCGTGGAGGCGAAAGCGAGTGAGAGCCGAGGGCCCGAGGCACATCAGAGTGCGCGGGGCGGGGGTGGGGACTCCGCTCTCTCTATCGGAGGGACGTGCGGGCGGGGACGGACGGACGGAGGGAGGCAAGTG…
262	Chr01	19734612	20294361	A	AAATTAGTATAAATATAAAAAAGATAAGTTATACTTAAAG	39	GGACAAAATCAATTAGCTACCAGTAAAGCTATTGATAGGAGTAATTTATTAGACTCGCTTCCTCTGCTCATCACCCACACACGACTGTTGAGCACCAATGTTTGGTGACCTTTTCCTATCCTTCACGCTAGATTTTTCTTTTGGCGTTTCTAGAAGCCCCGTCGCTATAGACCGGGTGACACGCGGCGGCAAAGCACGGGCGGTAGTCGGTGGCCGAAGCACCCCAACCCCCAACTAACCGTGCTCACGATCATGTCCACGATATCACTTTGCCTGTGTGGGCTAACCGGCTAAACAAAAAGACCCTTGTCAAAATCAAACAGGAAAAGAATAAAGTGCGAACGAAAAGAATATCGCTAGAAGATCGTCACAAACAGAGACGATCGGGTCGCTGCCGTG…	AATTAGCTACCAGTAAAGCTATTGATAGGAGTAATTTATTAGACTCGCTTCCTCTGCTCATCACCCACACACGACTGTTGAGCACCAACGTTTGGTGACCTTTTCCTAACCTTCACGCTAGATTTTTCTTTTGGCGTTTCTAGAAGCCCCGTCGCTATTGACCGGGTGACACGCGGCGGCAAAGCACGGGCGGTAGTCGGTGGCCGAAGCACCCCAACCCCCAACTAACCGTGCTCACGATCATGTCCACGATATCACTTTGCCTGTGTGGGCTAACCGGCTAAACAAAAAGACCCTTGTCAAAATCAAACAGGAGAAGAATAAAGTGCGAACGAAAAGAATATCGCTAGAAGATCGTCACAAACAGAGACGATCGGGTCGCTGCCGTGATGTTTTCAC…
263	Chr01	19779641	20336288	TATATATATATATATATATATATATATATATATATATATATATATATATAT	T	50	TGCACGCATGTAATAGATTAAGATTTGATGCGATGCAAATGCAGGACCGTTAAGTTAGCCATTTGAAGAAATGTTCAGATGTATAATCTTAATATATAATCAGTTTCTGCGAGAAAATATTTATATATACTGCTGCTAGGAAAATTATTCTTGTTATCCCCTTGCGTAAATAACAATATTAATATAATATATATCTTGCTCCTGTATATACTATATATATAATATAATTTTACTGAAGAACTTAAAAATGTATGCGACACCATTTGAGCCGATCATACGACACCATTTGATTCTGTGTTAGCTAGCTTCTGGAGATAACTGAATAAGTCTGTGGTTGTGTGTCTTGGACATGATTCGGCAGGTGTAATTCTTTGTTTAGTTTTCTTGTTTCTTGCCCCT…	CACTATGCACACACGTAATAGATTAAGATTTGATGCAAATGCAGGACCGTTAAGTTAGCCATTTGAAGAAATGTTCAGATGTATAATCTTAATATATAATCAGTTTCTGCGAGGAAATATTTATATATACTGCTGCTAGGAAAATTATTCTTGTTATCCCCTTGCGTAAATAAAAATATTAATATAATATATATCTTGCTCCTGTATATACTATATATATAATATAATTTTACTGAAGAACTTAAAAATGTATGCGACACCATTTGAGCCGATCATACGACACCATTTGATTCTGTGTTAGCTAGCTTCTGGAGATAACTGAATAAGTCTGTGGTTGTGTGTCTTGGACATGATTCGGCAGGTGTAATTCTTTGTTTAGTTTTCTTGTTTCTTGCCCCT…
264	Chr01	19813330	20400029	GATTTATTTTAGTTCCTCTCACAAAAATATAA	G	31	AGTGGTGGTACGGGGGAGCACTTTTGATGAATTAATATTGGTCACCCCCGTTTGTAAATACATATCAGTTTGACTTTGACTGATCATGCTTTGGCTATCAGTAATTCTCAAATTAAATTATAGATTTGCGATGTAAAGTACTTTGTTCTCTCTGTTTAATATTATAAGATGTATTGATTTTTTAACTCAAAGTTTAACCATATCTTTAGGAAAAATATAGCAACATCTACAATACCAAATTAATTTCGTTAAATCGAATATTGAAAATATTTTGATACTACATTTGTTTTGTGTTAAAAATGTTACCATGTTTATCTATAAATTTGATCAAAGTTAAAAGAGTTTAACTTTAAAAAAAGTCCAAACGCCCTACAATATAAAAAAGGAGTGTATTTTTGT…	CCGAGTGGTGGTACGGGGGAGCACTTTTGATGAATTAATATTGGTCACCCCCGTTTGTAAATACATATCAGTTTGACTTTGACTGATCATGCTTTGGCTAGCAGTAATAATTCTCAAATTAAATTATAGATTTGCGATGTAAAGTACTTTGTTCTCTCTGTTTAATATTATAAGATGTTTTGATTTTTTTAAGTCAAAGTTTAACCACATCTTTAGAAAAATATAGCAACATCTACACTACCAAATTAATTTCGTTAAATCGAATATTGAAAATATTTTGATACTACATTTGTTTTGTGTTAAAAATGTTACCATGTTTATATATAAATTTGATCAAAGTTAAAAGAGTTTAACTTTAAAAAAAGTCCAAACGCCCTACAATATAAAAAATGAGTGTAT…
265	Chr01	19883206	20588139	G	GCTCGATAGAAGCTCGAACCGAGCCTAATCAGCT	33	CAATATTATGTTGAGGCAATAATGGAGCCATGGAGAGGGATATCGATCAAGGCAGGCATGCAATATTGCAATTGCAAAGCTTGGCCGGATGGAGGAGAAAGACGGAGGATTGATGATGGGGAGAGGTCAACTGGACCCACGCCAAAAAGGAAATTCTCCATGAGCACGCATGCGAAGCAGAATCAGCATCACTTCGATCTGCAGGGGCAAATCGCACCACCGGCTGTGGCCTGTCACACCACCAACTTCCCAATCCCGGCCGTTGGAGGCCGATCGATCGACAAACGTGGCAGATCGATCCCCGCAAGTGGGCATCGCATTCCCAATCCGTAAAGCCGGGAGGTCAGGGGTTGCAAGCTGAGGGAGTGAGGGGACTGGGACTGGGTAATTAATGCGCGC…	TCGATCAAGGCCGGCATGCAATATTGCAATTGCAAAGCTTGGCCGGATGGAGGAGAAAGACGGAGGATTGATGATGGGGAGAGGTCAACTGGACCCACGCCAAAAAGGAAATTCTCCATGAGCACGCATGCGAAGCAGCATCAGCATCACTTCGATCTGCAGGGGCAAATCGCACCACCGGCTGTGGCCTGTCACACCACCAACTTCCCAATCCCGGCCGTTGGAGGCCGATCGATCGACAAACGTGGCAGATCGATCCCCGCAAGTGGGCATCGCATTCCCAATCCGTAAAGCCGGGAGGTCAGGGGTTGCAAGCTGAGGGAGTGAGGGGACTGGGACTGGGTAATTAATGCGCGCACGGTCGCCTCCCTTGCTCGCGTCCTCCCTATATAGGTATCC…
266	Chr01	19885283	20590261	ACGCTTTCTTATCTCAACCACAATATTTAATTTCT	A	34	ATATTCACTTTTAACTAGAGAGTTTATCGATAGACTTATACTGTGATCTAGCTTAGTTAATTATCTAGTACGACCAGACAACAAAAAAGGGATCGCATGTCAAAAGAGAAACATGCTAATCTCACTTTCCAGATATCACTACAAAAACAAACTGCGTTTTCTCCCTTAGCTTCTTTTTTATCCTCACTTTTGCGTTCTCCATGCACGATCGATAAGCCGCATCCCATACTCTGCAAAGCCACCCACCCCGGGTATCTCACTGATGCACACCCATGAATTGAAAGAACAAAGAACTAGCATAAAAAAAAAACTTTCTTCAACTCTCGATCCTAAAATATAGAAACTGAATTTTGTTTCGAAATTAATATAGCAACTTCTACACCTACTCCTGTTACTACA…	ATATTCACTTTTAACTAGAGAGTTTATCGATAGACTTATACTGTGATCTAGCTTAGTTAATTATCTAGTACGACCAGACAACAAAAAAGGGATCGCATGTCAAAAGAGAAACATGCTAATCTCACTTTCCAGATATCACTACAAAAACAAACTGCGTTTTCTCCCTTAGCTTCTTTTTTATCCTCACTTTTGCGTTCTCCATGCACGATCGATAAGCCGCATCCCATACTCTGCAAAGCCACCCACCCCGGGTATCTCACTGATGCACACCCATGAATTGTAAGAACAAAGAACTAGTATAAAAAAAAAACTTTCTTCAACTCTCGATCCTAAAATATAGAAACTGAATTTTGTTTCGAAATTAATATAGCAACTTCTACACCTACTCCTGTTACTACA…
267	Chr01	19893296	20598052	A	ATTTTTTTCTAGCGTGTTTTTTTTTACGAACTACGGAACT	39	GACAATTAAAAAATTAGAAAATTGGAACATCTTAAATATAATAGCCCAACCTCGATGATGACAACCTTACGATGTTTGCTTTACCTAAAATAATTGGATTATTCATATAACAACATGCATATAATCTAAAATATTCTTTTAATCTCATTCTTGCAACCAATCAAATCCTACACTACCTCGTATGGTCAAGTCTACACAAAATAGAGCCACTATGCACTCTTCTCTAAATAGCAATTAAAATATGTTTATTTTCGAAGATTATTTCCATATAATATGTTATCAAGAATAATAGTTATACTTCAAAAAATATTTTTTATGATAACTGCCTACAAAAATGTGCAGGGTCTCCAATATAGGAGAATAGATGACGAAACAAGTTGTGTAGGAGACGGAAAAAAG…	AATTAAAAAATTAGAAAATTGGAACATCTTAAATATAATAGCCCAACCTCGATGATGACAACCTTACGATGTTTGCTTTACCTAAAATAATTGGATTATTCATATAACAACATGCATATAATCTAAAATATTCTTTTAATCTCATTCTTGCAACCAATCAAATCCTACACTACCTCGTATGGTCAAGTCTACACAAAATAGAGTCACTATGCACTCTTCTCTAAATAGCAATTAAAATATGTTTATTTTCTAAGATTATTTCCATATAATATGTTATCAAGAATAATAGTTATATTTCACAGAAATATTTTTTATGATAACTGCCTACAAAAATGTGCAGGGTCTCCAATATAGGAGAATAGATGACGAAACAAAAGTTGTGTAGGAGATGGAAAAAAG…
268	Chr01	19919682	20629512	GTTAACCAAATTGGCATGCTCTATTAAAATCTTACATAGATG	G	41	ATAAGAAATTTGTTCCAGCTAGGACGTTGGGTTTATTACGGTGCCGTTAGGGTCTGTTTGATACAGTTCCAACTGCTAAATTTAGCTTTAGGAGTTAGGTCTGCAGTGGAGTTATCAAGCTGTCTAAATCCAGCTTCATAACTCTAATTCATTTTGTGATAGAGCTCCACTCAGCTCCGCTCCCTTTTTGGTGGAGCTAAAACTGTTTGGCTGAGCTCCAGCTCCAGGAGGGGAGAAGCTGAAGCTGGAGCTGTGCCAAACAGATTAGGAAATTTTTTTATCCAATTACACAAGACATACCCACCGCATTCAATATATTCAGAAGTGAGATTTACTAAATTTATATTGAGAGTAAATTTTATAAAACATAGTCTATTATTATTCAACTTACACAAAACC…	GTTCCAGCTAGGACGTTGGGTTTATTACGGTGCCGTTACAGCCTGTTTGTTACAGTTCCAACTGCTAGATTTAGCATTTAGCTTTAAGAGTTAGGTCTGGAGTGGAGTTGTGAAGCTGTCTAAATCCAGCTTCATAACTCTAGTTTATTTTGTGATAGAGCTCCACTCAGCTCCGCTCCCATTTTTGGTAGAGCTAAAACTGTTTGGCTGAGCTCCAGCTCCAGGAGGAGAGGAGCTGAAGCTGGAGCTGTGCCAAACAGATTAGGAAATTTTTTTATCCGATTACACAAGACATACCCACCGCATTCATATATTCAGAAGTGCGATTTACTAAATTTATATTGAGAGTAAATTTTATAAAACATAGTCTATTATGATTCAACTTACACAAAACCACTT…
269	Chr01	19943812	20669418	T	TTTTTTTTTGAAAGGAAAAAATAGTGGTGAT	30	TTCGGGTTGGCACTTTACAATTTTGTGTTGTATGAATATATAAACAACTCAATTGTGCATGCAATTAGTGGTTGATAGAAAATTGGCTTCAATATCTTTAGTTTCGTCAGAAGATTTTGTGATCTAACTCAGTTCTTTTCCATGGCTGATACTGTTGATTCTTAATTTTCAGTTTGGATATTAAAGGAATTAATGTATGCATATGTTATACATTTTCTCTTCAAATTCGGCTTGATTACAAGAGGGTTTGTTTCTCTATATATAATCTGGATGGATTCATATGCACCTCTGCTGTGCTCTGGTATGTTGAGGACAGGAGGGATGTATATATATAATTGTGGAGTTGAAAACTTTATATGGCCATGTGACATAAGAGTGCTATGCATGTGTTCTTTCACA…	TTCGGGTTGGCACTTTACAATTTTGTGTTGTATGAATATATAAACAACTCAATTGTGCATGCAATTAGTGGTTGATAGAAAATTGGCTTCAATATCTTTAGTTTCGTCAGAAGATTTTGTGATCTAACTCAGTTCTTTTCCATGGCTGATACTATTGATTCTTAATTTTCAGTTTGGATATTAAAGGAATTAATGTATGCATATGTTATACATTTTCTCTTCAAATTCGGCTTGATTACAAGAGGGTTTGTTTCTCTATATATAATCTGGATGGATTCATATGCACCTCTGCTGTGCTCTGGTATGTTGAGGACAGGAGGGATGTATATATATAATTGTGGAGTTGAAAACTTTATATGGCCAAGTGACATAAGAGTGCTATGCATGTCTTCTTTCACA…
270	Chr01	19986278	20716586	CATGTACCCTTTTAGGCCCATTCCATGTGAC	C	30	ATAACATGTTCTTAGAGATAATAATTAGATTGCAATCCAGTGCTTCAGTTCATTAGTAGTATCTTTTGCATATATATAAATATTAAATAAATATTGAAATCATGCTTGGGATTTAAAACTGAAGGATCAAAATGGGGTGCATGGATATAGATAATATCTTACCATGCATACACACCCTATATTATATTTATCAATTTGGCTATGGCCCCAATTAATTTTGAACAAAGGTGACCGGATGTATATCTCATATCTATCGTTTAGATCCCTTCTCCAAAATAATACGTAAATACTTTGTTTTCTTTACCCTTGCCTTTCCTTCCACTCCCCTCCTCTAGTTGCCGCCTCCTACTCAACAGACATCCACCCCTTTTATAAAGCCACTACAATTAGCACATCTCA…	TAACATGTTCTTAGAGATAATAATTAAATTGCAATCCAGTGCTTCAGTTCATTAGTAGTATCTTTTGCATATATATAAATATTAAATAAATATTGAAATCATGCTTGGGATTTAAAACTGAAGGATCAAAATGGGGTGCATGGATATAGATAATATCTTACCATGCATACACACCCTATATTATATTTATCAATTTGGCTATGGCCCCAATTAATTTTGAACAAAGGTGACCGGATGTATATCTCATATCTATCGTTTAGATCCCTTCTCCAAAATAATACGTAAATACTTTGCATTCTTTACCCTTGCCTTTCCTTCCACTCCCCTCCTCTAGTCGCCGCCTCTTACTCAACAGACATCCACCCCTTTTATAAAGCCACTTCAATTAGCACATCTCAC…
271	Chr01	20056306	20786595	ATATATATATATATATATATATATATATATATATA	A	34	AGCTAGCTAGTCCTGTAGCTTATTAGCTGCATGCATGTATACAGTACTCCCTCCGTCCTAAAATATATCTCCTCCGATTCACAATATAAGTCATTTTAGCATTTTCTATATTTATATTGATGTTAATGAATCTAGACATATATATCTATCTAAATTCATTAACATTAATATAAATGTGGGAAATACTAGAATGACTTACATTGTGAAACGGAGGGAGTAAGTATTTTTAGACTTCGACATAGTCTTCGAGATGTTACTTTGACCAACGATATATATAAAAGTAAAATGTTTTAAATAAAAAGAGTTATATATTATGATAGTTTATTTAATGATAAATCTAGTAATATCAATTTTACATGATTGATCTTTTTAATTTTTTTTTGCTATTAATAGTCAAAG…	AGCTAGCTAGTCCTGTAGCTTATTAGCTGCATGCATGTATACAGTACTCCCTCCGTCCTAAAATATATCTCCTCCGATTCACAATATAAGTCATTTTAGCATTTTCTATATTTATATTGATGTTAATGAATCTAGACATATATATCTATCTAAATTCATTAACATTAATATAAATGTGGGAAATACTAGAATGACTTACATTGTGAAACGGAGGGAGTAAGTATTTTTAGACTTCGACATAGTCTTCGAGATGTTACTTTGACCAACGATATATATAAAAGTAAAATGTTTTAAATAAAAAGAGTTATATATTATGATAGTTTATTTAATGATAAATCTAGTAATATCAATTTTACATGATTGATCTTTTTAATTTTTTTTTGCTATTAATAGTCAAAG…
272	Chr01	20232221	20962448	T	TATATATATATATATATATATATATATATATATATATATATATATACAT	48	TACTTAAGTCTAAAACTCAACATGCAAACATGCTACCTCATCATCCACTAGCAATAACTACTTATCAAATAGCTCATGCAAACATGCATCATACATAATTTATTTAATCCTACAAATCAAAATGCAAATAGATCCAATCAACCTCTCTCATCATTTCCATAATATTTCAACAAATATATCCATCATTTTTTATAATACTCAACGTATATTCATTCATATATTCCATATCAAAGCAAAGATATTATTTAGTTTGTTTCATGCTTACTACTAATAAATCCTAGCTTTTTATTTCTTTTTTCCTTCTCTTCCGCTTATTGTGATACAAATCTTGGCCAACAACATAAATATTATCTATAATCCTCTACAAAGTCTATTAAATTTGTTTCTCTTCAAATATGG…	TACTTAAGTCTAAAACTCAACATGCAAACATGCTACCTCATCATCCACTAGCAATAACTACTTATCAAATAGCTCATGCAAACATGCATCATACATAATTTATTTAATCCTACAAATCAAAATGCAAATAGATCCAATCAACCTCTCTCATCATTTCCATAATATTTCAACAAATATATCCATCATTTTTTATAATACTCAACGTATATTCATTCATATATTCCATATCAAAGCAAAGATATTATTTAGTTTGTTTCATGCTTACTACTAATAAATCCTAGCTTTTTATTTCTTTTTTCCTTCTCTTCCGCTTATTGTGATACAAATCTTGGCCAACAACATAAATATTATCTATAATCCTCTACAAAGTCTATTAAATTTGTTTCTCTTCAAATATGG…
273	Chr01	20573038	22088778	CTGGCTTTCGGCAGTCGGCTGACTTTCGGCAGTCGGC	C	36	TGGCACACTTCCTCGTCTTCTTTTTGTCGATTTATGACAATACCGGCGGCTTGTGAGTTCTCGTCCCACCATTTGATCAAGATAGGGGGACGAGAGCTGTCGGTCGCCTTTATGCGGAGGACTTCTTCTTCGTCGTCGCCCGGCGGTCCTGATGTGTTTCCAGGACGTTAGGCGGATAAACTGAAGTTATTTAAATCAGCATTACTTGAGAAGATGATTTACCCGAAGATATTCCCAGCTGAGCGTGAGATGATTCTTGCCCTTTATATGGAGACCCAATCATCGAGTTGTTACCAGCCTCTGGTCCTTGAGAGGTTGTCTGCGCTTCGGCTTCAGGAATCTCTTGATTTAGACCTTCATCCGACTGGTTTCCAGTCGGGGGCTCTTGGGTTGTTGCAG…	CACACTTCTTCATCTTCTTTTTGGCGGTTTATGACGATGCCGGAAACTTGAGAGTTCTCGTCCCACCATTTGAGTAAGATAGGAGGACGAGAGTCACCAGCTGCCTTTATCCGGAGAATTTCTTCTTCGTCGTCGCCTAATGGACCTGATGAATTCCCAAGACATTAGACAAACAAGCTGGAGTTATTCAGAACGGCATTACTTGAAAAGATGAGTTACCTGAGGATGTGCCTAGCTGAGCGTGAGATGATCCTTGCTCTTTATCTGGAGAACCAACCACCGAGTCATTGCCAGCCTCTGGTCCTTGAGAAGTCGTCGTTTGCGCTTCAACTTCAGGGATTTCTTGGTCGGGACCTATATCCGACTGGTTTCCAGTCGGGGGCTCTTGGGTTGTTGCAG…
274	Chr01	20626863	21603611	A	AGCCTTTAAGGTGAGGGGCTCCCCCACTTATATCTTAGTTCCTT	43	CCCCAAGCCGACTCCCAGTCCATCACCGCGAATACTCTCCCGAGACATCGAGTCACCTACACATGAAATAAACAAAGAAACCATATTCCAAGACCAAGCTATCTACAACTTGACTCATTAGTAGCAAACAACAGTATTACATACGTATAGTATCCATCTAGAAGTCATAATCATGAAGTAATCACGGATATCCAAACAAACAACCCGAAACTGAAACCGACACAGCGTCGGCGGGTCAGACCGCGGGCTGCGCCGGTCTGACCGCGCATTACACGCCGGTCTGACCGGCTACCAGAGCCCGGTCTGACCGGTCACATGAAATAATGAATCCTGCGATCACCTGTGAATCCAATCATCTCTAAAACCACTTCGTGAATAAATTCCAAATAACAAAACCAA…	CCCCAAGCCGACTCCCAGTCCATCACCGTGAATACTCTCCCGAGACATCGAGTCACCTACACATGAAATAAACAAAGAAACCATATTCCGAGACCAAGCTATCTCCAACTTGACTCATTAGTAGCAAACAACAGTATTACATATGTATAGTATCCATCTAGAAGTCATAATCATGAAGTAATCACGGATATCCAAACAAACAACCCGAAACTGAAACCGACACAGCGTCGGCCGGTCAGACCGCGGGCTGCGCCGGTCTGACCGCGCATTACACGCCGGTCTGACCGGCTACCAGAGCCCGGTCTGACCGGTCACATGAAATAATAAATCATGCGATCACCTGTGAATCCAATCATCTCCAAAACCACTTCGTGAATAAATTCCAAATAACAAAACCAA…
275	Chr01	20674986	21643340	ATATATATATATATATATATATATATATATATA	A	32	TCATATGTATGTTAATTAGAGTTTTTAACATTTAATTTACTAGCATTCATATGCTAATTATAATTGACTAGAGGATTTTTAAAAGTTTTAAATCACGCAAGTGGCAATTTCATATGTTAATTATAGTTTTTAACATTTAATTTACTATCATTCATATGCAAATTATAATTGACTGGAGAATTTTTAAAAGTATTAAATTTAATATATTTTTAAAACTATCATTCATATATTAGAGTTTTTCACAATTTAATTTACTATCTTTCATATGCTACTTATATATGACTATTCGAATTTTTAAAAGGTTTAAATCATGCATGTGGCATTTACATATGTTAATTAGAGTTTTTAGCATTTAATTTAATATAATTCCTACGCTAAGTATATATGATGATTACAATT…	TCATATGTATGTTAATTAGAGTTTTTAACATTTAATTTACTAGCATTCATATGCTAATTATAATTGACTAGAGGATTTTTAAAAGTTTTAAATCACGCAAGTGGCAATTTCATATGTTAATTATAGTTTTTAACATTTAATTTACTATCATTCATATGCAAATTATAATTGACTGGAGAATTTTTAAAAGTATTAAATTTAATATATTTTTAAAACTATCATTCGTATATTAGAGTTTTTCACAATTTAATTTACTATCTTTCATATGCTACTTATATATGACTATTCGAATTTTTAAAAGGTTTAAATCATGCATGTGGCATTTACATATGTTAATTAGAGTTTTTAGCATTTAATTTAATATAATTCCTATGCTAAGTATATATGATGATTACAATT…
276	Chr01	20676222	21644571	GAGCTAGGGAACGTGAACGAGCGAACGAACGAGGACG	G	36	CGCCGCCCGCCACGAGACGCCGCGCCACGACGACGACGCGCCACGCCGCCGCCTTCGCCGCCACCGCATGCCAACGCCACGCCGCCGCCGCCTTCACCACGCCGCCGCCGCCTTCGCCGCCGCGCGCGCAATGCCGCCGCCGCCACGCCACGCCACGCCGCCGCCGCCAAGCCACGCCGCCGCCGCCACGGCCCCGCAACGCCACGCCGCCGCCGCCGTCGCCACGCCGCCGCCGCCGCCGCCACGCCGCCGCGCCAACCGCCGCCCCGATGCCGCCACACCGCCGTTAACGAACGAGAACGAGAACGATCGAACGAACGAGAGCGAGAACGAACACGTCAACGTACGTTGCCGCGAGAACGTGAACGAGAACGAGAACGATCGAATGAACGAGAGCGA…	CCACGACGACGACGCGCCACGCCGCCGCCTTCGCCGCCGCCGCATGCCAACGCCACGCCGCCGCCGCCGTCGCCACGCCGCCGCCGCCTTCGCCGCCGCGCGCGCAATGCCGCCGCCGCCACGCCACGCCGCCGCTGCCACGCCACGCCACACCGCCGCCGCCACGGCCCCGCAACGCCACGCCGCCGCCGCCGTCGCCACGCCGCCGCCGCGCGCCGTCGCCACGCCGCCGCCGCCGCCGCCACGCCGCCGCGCCAACCGCCGCCCCGATGCCGCCACACCGCCGTTAACGAACGAGAACGAGAACGATCGAACGAACGAGAGCGAGAACGAACACGTCAACGTACGTTGCCGCGAGAACGTGAACGAGAACGAGAACGATCGAACGAACGAGAGCGA…
277	Chr01	20719296	21686702	GTAGACATATATATCTATCTAGATTCATTAACATCAATATGAA	G	42	TTGATGTTGTGTTGGCCAATGGTTTCCTCCGTGAAGGAGATCAAATAGTTACATGTGGCATGCAGGTATGAGTTATTCCATTCCTTTATTAACTAATTTAAAATGTTTATGGTCTTTCCGATACATTACTGATCATATTGCTTTTGTGCTTCCTAGGGGCCCATTGTGACTCATCAGGGCTCTGTTAACACCTCATCCTATGAAAGAGCTTCGAATTAAGGTGTGTAAGTGGTGATTTTGATGCTTTCTTAGTTTCTTGTTATTATTATTTGTTAACACCTGGAATCCTGGATTCATTAAGTGAGCCATAATATCTTTTCACCGTTTTAAGGATGAAATACCTCTAGTATGAATTTGTTCGAGCAATTGGATTCATTATGTTTAAACAGTACTCCCTCC…	ATGTTGTGTTGGCCAATGGTTTCCTCCGTGAAGGAGATCAAATAGTTACATGTGGCATGCAGGTATGAGTTATTCCATTCCTTTATTAACTAATTTAAAATGTTTATGGTCTTTCCGATACATTACTGATCATATTGCTTTTGTGCTTCCTAGGGACCCATTGTGACTCATATCAGGGCTCTGTTAACACCTCATCCTATGAAAGAGCTTCGAATTAAGGTGTGTAAGTGGTGATTTTTGATGCTTTCTTAGTTTCTTGTTATTATTATTTGTTAACACCTGGAATCCTGGATTCATTAAGTGAGCCATAATATCTTTTCACCGTTTTAAGGATGAAATACCTCTAGTATGAATTTGTTCGAGCAATTGGATTCATTATGTTTAGACAGTACTCCCTCC…
278	Chr01	20765600	21729881	GCATAAGCATTCATCTTTGGCCTCAAGAATATCACGGGATATAGA	G	44	TTTGATTTCATCCGATTTCATATTATGGGTCTGTTTGGCACAGCTCCAGCTCCAGCTAGCTCCACCCCTCTTGAAGCTAGAGCTCAGCCAAACAGTTTCAGCTCCACCAAAACTGGGAGTGGAGCTGGGTGGAGTCCTCTCACAAAATGTACTAGAGTTGTGGAGCTGGGTTTAGGCAGCTCCACAACTCCACTCCAAACCCAATTCCTGGAGCTAAATTTAGGAGTTGGAGATGTACCAAACATGCCCTATATATTTGAAAATTGTGAAAATATAGAGGTGACAAGCTATGAGGGAAAATTTGCTTTCAGCCACTTCTCTTATAAGAGGGCGCACAGCTTTTTTATATTAATTAAAAAAGTGCCCTCCGAGAGGGCAGGAGGAGCCTCTCCTCCAAAC…	TTTGATTTCATCCGATTTCATATTATGGGTCTGTTTGGCACAGCTCCAGCTCCAGCTAGCTCCACCCCCCTTGGAGCTAGAGCTCAGCCAAACAGTTTCAGCTCCACCAAAACTGGGAGTGGAGCTGGGTGGAGTCCTCTCACAAAATGTACTAGAGTTGTGGAGTTGGGTTTAGGCAGCTCCACAACTCCACTTCAAACCCAATTCCTGGAGCTAAATTTAGGAGTTGGAGATGTACCAAGCATGCCCTATATATTTGAAAATTGTGAAAATATAGAGGTGACAAGCTATGCGGGAAAATTTGCTTTCAGCCACTTCTCTTATAAGAGGGCGCACAGCTTTTTTATATTAATTAAAAAAGTGCCCTCCGAGAGGGCAGGAGGAGCCTCTCCTCCAAAC…
279	Chr01	20765742	21729979	ATATATATATATATATATATATATATATATATATATATATAGGGATTATTTTGCAG	A	55	CAAAATGTACTAGAGTTGTGGAGCTGGGTTTAGGCAGCTCCACAACTCCACTCCAAACCCAATTCCTGGAGCTAAATTTAGGAGTTGGAGATGTACCAAACATGCCCTATATATTTGAAAATTGTGAAAATATAGAGGTGACAAGCTATGAGGGAAAATTTGCTTTCAGCCACTTCTCTTATAAGAGGGCGCACAGCTTTTTTATATTAATTAAAAAAGTGCCCTCCGAGAGGGCAGGAGGAGCCTCTCCTCCAAACCCTGTATGCGCTCTCTAGTAGCGTGAATGCACACTTCTTTCCTTGAACAAGCTGCCCCATTGTCTTTATGAGCAAACATCTATGCAACAAAATAAACATAGCATAAGCATTCATCTTTGGCCTCAAGAATATCACGGGATAT…	CAGCTCCACCAAAACTGGGAGTGGAGCTGGGTGGAGTCCTCTCACAAAATGTACTAGAGTTGTGGAGTTGGGTTTAGGCAGCTCCACAACTCCACTTCAAACCCAATTCCTGGAGCTAAATTTAGGAGTTGGAGATGTACCAAGCATGCCCTATATATTTGAAAATTGTGAAAATATAGAGGTGACAAGCTATGCGGGAAAATTTGCTTTCAGCCACTTCTCTTATAAGAGGGCGCACAGCTTTTTTATATTAATTAAAAAAGTGCCCTCCGAGAGGGCAGGAGGAGCCTCTCCTCCAAACCCTGTATGCGCTCTCTAGTAGCGTGAATGCACACTTCTTTCCTTGAACAAGCTGCCCCATTGTCTTTATGAGCAAACATCTATGCAACAAAATAAACA…
280	Chr01	20796816	21768956	GGAATGATAAAACGGAGGAATAGGAAAAACGGT	G	32	TTTCAGTGGTGGACGACGTAACCGTCGACGGTGAGACGTCCGTATTAACTTCATCAATTTCAAGATGTGTTGGCGTAGTCCGGAGGTACTCATAGTGATAAGATGTGTGCGTGTACGTTCATAGAGAGAAGAGTGTGTCCATGTTGTAAACGCCTATATTTATACTATGTTGTTTTTTATAAAAGAAAAAGATTAACTCACTGCTAAGTTTGGGGGGAGCACATCGATCAACATCTCCGGTCGTGGCCGGTCTCCAGCCGAGACGACCCTTCCATACGTACGTACGTTGATTAGTTGAAGCCAGCCAGCCAGCCAAGGTTATTGTCGCTGTCTGCCCACTGCTCTGCCTTGACCACCCCCGGCCCCGCGCCGTGCCACCGGGCTCACGTCGCTGCGCTA…	TATGACTAATTATTTTTTCAGTGGTGGACGACGTAACCGTCGACGGTGGGACGTCCGTATTAACTTCATCAATTTCAAGATGTGTTGGCGTAGTCCGGAGGTACTCATAGTGATAAGATGTGTGCGCGTATATTCATAGAGGGAAGAGTGTGTCCATGTTGTAAACGCCTACATTTATACTATGTTGTTTTTTATAAAAGAAAAAGATTAACTCACTGCTAAGTTTGGGGGGAGCACATCGATCAACATCTCCGGTCGTGGCCGGTCTCCAGCCGAGACGACCCTTCCATACGTACGTACGTTGATTAGTTGAAGCCAGCCAGCCAGCCAAGATTATTGTCGCTGTCTGCCCACTGCTCTGCCTTGACCACCCCCGGCCCCGCGCCGTGCCACCGGGCT…
281	Chr01	20801440	21773708	A	ATATATATATATATATATGTATATATATGTATATG	34	CGCAGTTATACCGAGAAGAAGGATAAAAAAATGGTAAAAAGATAAAAAGAAGGAGAAGAAAAGAAAGGAAAAGGATAATTTTAAGTGGGTCATAGCCTTGGGGAAAAAGTATGAATTACCCCCCCCCCCTCCCCAAAAAAAAACTATCGTGGTCGGCCAAATTACCCCCATAAACTTGAAAACCAGACATTGCTCACCCTAAACTTTCAATATCGGACGAATTACCCCCTAGACCCAAACCAGAACGGTTTTATATACATTTTGAGAGTTTGGGGACCTAATATGGTTTTGTAGAACTCTAACTATAATATCCGGGGTTACGTTCTATGAAATTTACTCATAAATTTATAGCATGAACATCGTTTGCGGTACACTAGATTACACTATTGTTACATAAAA…	AGTGCCCGCAGTTATACCGAGAAGAAGGATAAAAAATTGGTAAAAAGATAAAAAGAAGGAGAAGAAAAGAAAGGAAAAGGATAATTTTAAGTGGGTCATAGCCTTGGGGAAAAAGTACGAATTACCCCCCCCCAAAAAAAAAACTATCGTGGTCGGCCAAATTACCCCCATAAACTTGAAAACCAGACATTGCTCACCCTAAACTTTCAATATCGGACGAATTACCCCCTAGACCTAAACCAGAACGGTTTTATATACATTTTGAGAGTTTGGGGACCTAATATGGTTTTGTAGAACTCTAACTATAATATCCGGGGTTACGTTCTATGAAATTTACTTATAAATTTATAGCACGAACATCGTTTGCGGTACACTAGATTACACTATTGTTACATAAAA…
282	Chr01	20823629	21796425	T	TTGCAATTATTAAACTCCATTTTTATCTTAAGTTCC	35	TTACCAGCCTATGCTTGATGCACCTGTGTATGGAAGAATTGCAACAATTGAGCTCTTCCGTCCTTGTGTAAGTTTGTACTCTGTTTCTCCAGCTAAAAAATTGAAAGATTCTCCCTGCCTTCAGACAGTATTGTTGTAGGACTGATCTTAAGATCTTATGTTTTCCGGTCCCATCGTTATGGCATATTTGCAAACGAAAAATAATTTGTGAATAAAACTTTTATATACGTGTTTTTAGCAATCTAAAAGTAAAAGCTGAAAAATAAATTTCAATGAAAAAACCCTAAAATCAACTCCAAATTTAAAGTTAAAAATTGAAATTTTAGTTGAAAAACATAAGCATAAGCGAAAAGATAAGGCTAAAATGAAACTCAAGAATCAAGATTCTCTTTTCATTTG…	ATGCTTGATGCACCTGTGTATGGTAGAATTGCAACAATTGAGCTCTTCCGTCCATGTGTAAGTTTGTACTCTGTTTCTACAGCTAAAAAATTGAAAGATTCTCCCTGCCTTCAGACAGTATTGTTGTAGGACTGATCTTAAGATCTTATGTTTTCCGGTCCCATCGTTATGGCATATTTGCAAACGAAAAATAATTTGTGAATAAAACTTTTATATACGTGTTTTTAGCAATTTAAAAGCAAAAGCTGAAAAATAAATTTCAATGAAAAAACCCCAAAATCAACTCCAAATTTGAAGTTAAAAATTCAAATTTTAGTTGAAAAGCATAAGCATAAGCGAAAAGATAACGCTCTTCATTCCTTGAATGAACCTCAAGAATTAAGATTCTCTTTTCATTTG…
283	Chr01	20863201	21836156	T	TATATATATATATATATATATATATATATATATATA	35	ATGTGTTGTACTTGATAATAAGTTTGCTAAAATTTATGATAACAATTAGCAATCTAAATTTAGAATTATGGTTAATGAAAATTTAAAAGTCAATGGTGGAATAAAATTAGCAATAGGTTTAAGAACATGAACATTTTGTTTTTTTATTACATGCATGCATGGAAGACGTGCACACTCATAATTGTTTTTGAGAACTCGTACATCACTAATCATGCACACCTCTTAATCATCATCGTTGCTACATTATTATCATACTCACCATTGCATGGCCCTCATATATTTTGTTGGCCCTCATATAAGTTTATTTTGATCGTCCAATTAAAAGTAAGAATTAGGATATGACGAAATCAACATTAAAATCATTTATTAAAATAAGTTGTACTATCCCAAATTAAAAGA…	ATGTGTTGTACTTGATAATAAGTTTGCTAAAATTTATGATAACAATTAGCAATCTAAATTTAGAATTATGGTTAATGAAAATTTAAAAGTCAATGGTGGAATAAAATTAGCAATAGGTTTAAGAACATGAACATTTTGTTTTTTTATTACATGCATGCATGGAAGACATGCACACTCATAATTCTTTTTGAGAACTCGTACATCACTAATCATGCACACCTCTTAATCATCATCGTTGCTACATTATCATCATACTCACCATTGCATGGCCCTCATATATTTTGTTGGCCCTCATATAAGTTTATTTTGATCATCCAATTAAAAGTAAGAATTAGGATATGACGAAATCAACATTAAAATCATTTATTAAAATAAGTTGTACTATCCCAAATTAAAAGA…
284	Chr01	20888755	21858550	AGTACTATTTTAAGGATTATTCTATCTACCTACTCATC	A	37	GAGGAAGGCACATAATCTCATTTTGTTATAACGTCACACAAATATAACTTTAGATAAAAGCATATCTAACACCCTAACCTAAACGCTTCAACTTACTACATAATATTGTTCATATAACTTCTAAGGTTGTTTTGAACATGCTGATTTCCGTATACAGATACTAAATAAGGTTTTGGTAAACAAAGATGACAAATTTCAGGATTAATCCTCGATTATTGTGATTGTATCGATCCTCAGTTATTGGTGTAAAAAAAGAGTGCATGGGAGAATTTGACATATATCTTGAATATATCTACTCCTCAGTCCGAAGATAACTTCATTTCTAATATGAACAGTTTATTCTAAAATAAGTTCATTTCTAGCCTATTATAAATTGTATTTCTTTTATACCTTTTATTC…	GCACGTAATCTCATTTTGTTATAACGTCACACAAATATAACTTTGGATAAAAGCATATCTAACACCCTAACCTAAACGCTTCAACTTACTACATAATATACATAATATTGTTCATATAACTTCTAAGGTTGTTTTGAACATGCTGATTTCCGTATACAGATACTAAATAAGGTTTTGGTTAACAAAGATGACAAATTTCAGGATTAATCCTCGATTATTGTGATTGTATCGATCCTCAGTTATTGGTGTAAAAAAGAGTGCATGGGAGAATTTGACATATATCTTGAATATATCTACTCCTCAGTCCGAAGATAACTTCATTTCTAATACGAACAGTTTATTCTAAAATAAGTTCATTTCTAGCCTATTATAAATTGTATTTCTTTTATACCTTTTATT…
285	Chr01	20946631	21913200	A	ACTAAAGAGATTGAATAACGAACGACTACGAGTT	33	GCAGTACCAAAACATTTTCGATCGTTGGATCTAGCTGTGCAGGATGGACATTGTTAGATCCAACAATCGGAAATGATTTGGTACCGTGAGGTACTGATACCTCGAGGTACTTTTTTGTTGGACCGGAGCAAACCACTTTTTTCAGCCTCGTCTCCACGAGTAGCCGCCTGTAGCGGTGTCTCATCACCCCTTCCCTGATACGCTTGTCCACGGGAAGCCGCCACCACAGACAACCCCAACAGCAATAAGGTAGGCATTTCTGGTTATGTACATGGATATTCCTCTCTCTAGGCTCATATTATTTTTATGAAATAAAATTGAATCAATTATATTCGTATTCAAAAGTAGTTATGATTATGCTTTTATAACATAAGACATAAGTGATATCCTAATAGAATA…	GCAGTACCAAAACATTTTCGATTGTTGGATCTAGCTGTGCAGGATGGGCATTGTTAGATCCAACAATCGGAAATGATTTGGTACCGTGAGGTACTGGTACCTCGAGGTACTTTTTTGTTAGACCGGAGCAAACCACTTTTTTCAGCCTCGTCTCCACGAGTAGCCGCCTGTAGCGGTGTCTCATCACCCCTTCCCTGATACGCTTGTCCACGGGAAGCCGCCACCACAGACAACCCCAACAGCAATAAGGTAGGCATTTCTGGTTATGTACATGGATATTCCTCTCTCTAGGCTCATATTATTTTTATGAAATAAAATTGAATCAATTATATTCGTATTCAAAAGTAGTTATGATTATGCTTTTATAACATAAGACATAAGTGATATCCTAATAGAATA…
286	Chr01	21043929	22016689	ATAATCTGAACATCTCTTTATATTTTATGACTAGTTCTTTTCTTCAGGCC	A	49	AGGGCTCCATGCTGTGCTCCGACATCGCGAAATCAGCTTGCCCCCTCGTCCCCTCTGCCTTTCTTTCTCTCTCTCTCTTTTCTTTCTCTTTTCGGTGAATTGACTGATGTACTGCTCGTCGTTGTTGGTGTTGTCGCTGCACTGTTGCTAGTGCTGCAATACAGCGTTGCTGCTGTGTGTATCTTCCTCCTCGCTTCCTCGTCTTTTTTCCATCACGCTCTGTGTTGTTTTTCTTGTCTCATCTCTCTGTTTTTTTTTAATCTTTCTTTCTCTTTCTTTCTTTCTTCTTCGCTTTCGATCGATGTGGCATAGGAGTACTGGGGACACGCCGAACAGTAAACTGTACCCCAATTCGTTGTAACGTCCGGTGTGGGGTATGGTTGATCGGAGACAGCCCAC…	GTGCTCCATGCTGTGCTCCGACATCGCGAAATCAGCTTGCCCCCTCGTCCCCTCTGCCTTTCTTTCTCTCTCTCTCTTTTCTTTCTCTTTTCGGTGAATTGACTGATGTACTGCTCGTCGTTGTTGGTGTTGTCGCTGCACTGTTGCTAGTGCTGCAATACAGCGTTGCTGCTGTGTGTATCTTCCTCCTCGCTTCCTCGTCTTTTTTCCATCACGCTCTGTGTTGTTTTTCTTGTCTCATCTCTCTGTTTTTTTTTTAATCTTTCTTTCTCTTTCTTTCTTTCTTCTTCGCTTTCGATCGATGTGGCATAGGAGTACTGGGGACACGCCGAACAGTAAACTGTACCCCAATTCGTTGTAACGTCCGGTGTGGGGTATGGTTGATCGGAGACAGCCCAC…
287	Chr01	21066422	22039123	A	AACAACAATAATAATAATAATAATAATAATAATAATA	36	TTTCATGCAATTTATCCCATGACAGCAACTTTAAGTTCGACTAGACAAGCACTTGACAATGCTTTAACTGGTTATGGCGTCGTAGATAGAAGAGAAATCTTATCATGTTCTATGACCAACAAATACGAGTCCCAAAAGGTTGTTACCAAGTTCAATGTGAAGTTTTTGTTTATCTATCTTGTAGATATCCTCACCATCTACCTATAAAGGATGAACCAAACAAAAAGTTTATACTATACTACTCTTGATTAGGATTATATCGTCGAAGCAAAGCCACCCAATTTCCATCAAGACAAAAAAAAGATACACCCTAGACATCTCCAAACGATTCCTACATTGCATCCTTTACTAGTGATATAGCACATCAGACGAACTTATCCACCATAAGATTCCGAATGA…	TTTCATGCAATTTATCCCATGACAGCAACTTTAAGTTCGACTAGACAAGCACTTGACAATGCTTTAACTGGTTATGGCGTCGTAGATAGAAGAGAAATCTTATCATGTTCTATGACCAACAAATACGAGTCCCAAAAGGTTGTTACCAAGTTCAATGTGAAGTTTTTGTTTATCTATCTTGTAGATATCCTCACCATCTACCTATAAAGGATGAACCAAACAAAAAGTTTATACTATACTACTCTTGATTAGGATTATATCGTCGAAGCAAAGCCACCCAATTTCCATCAGGACAAAAAAAAGATACACCCTAGACATCTCCAAACGATTCCTACATTGCATCCTTTACTAGTGATATAGCACATCAGACGAACTTATCCACCATAAGATTCCGAATGA…
288	Chr01	21122593	22124184	A	ATAAGAAATCCTGCCAAAATTTTGGCAAGTTGCCAAAATTTTGGCAACTATG	51	ATGGTTGAAGGGAGGGGAAGAGAGTTCAAGAGAGTTAGGGGGTTAGGGATATGACCATTAGTTTTACTAGATGATGCTCCGCGCTCTGCTGCAGGATATATGTTAATATTGTAGAAATGATTAAATGATTTGGATTGAAATATTGTGAAAATGATTTGAGAATGATGATTTAGCATGCGTATGTTTAGTATTAGATTGAAATAGGTTGTAGATATAATTACTATATGTTTGCATGTTGAGCTTTGTGTGCTTAATGGGTTATTAATGTGGCATACTTGCATGTTGAGCTTTAGGTGTTTAGTGGGCATTAGCTTTATAGAAAGAAGAGATATGGAGGTAATGAGTGATATAGAAGGTTGGATTTAGGTTGAGACAATTGAATCACGTCGAGGAGGTTTG…	ATGGTTGAAGGGAGGGGAAGAGAGTTCAAGAGAGTTAGGGGGTTAGGGATATGACCATTAGTTTTACTAGATGATGCTCCGCGCTCTGCTGCAGGATATATGTTAATATTGTAGAAATGATTAAATGATTTGGATTGAAATATTGTGAAAATGATTTGAGAATGATGATTTAGCATGCATATGTTTAGTATTAGATTGAAATAGGTTGTAGATATAATTACTATATGTTTGCATGTTGAGCTTTGTGTGCTTAATGGGTTATTAATGTGGCATACTTGCATGTTGAGCTTTAGGTGTTTAGTGGGCATTAGCTTTATAGAAAGAAGAGATATGGAGGTAATGAGTGATATAGAAGGTTGGATTTAGGTTGAGACAATTGAATCACGTCGAGGAGGTTTG…
289	Chr01	21149762	22151283	C	CTGTCATGCCGGTGTCTTCTTCCATAATTTT	30	ACATAAAAAAGCTAGAGGCTAACTGATCCATCCATTAACATTAAGAAAAAGACATACATATGTAAAAGATAAATAGATAATTTTATCTGATCTTCCGAGAAAGCTCTAGTTAGCCTGAATGGTTCTGTATATGAGAGATTATATATGTAATCTTGAGATGGTGACAACCTAATTAATTAATTAATTAACAAGCAAGCATCCAGGCTAATAAACCAGTGACTGCTAATAAACCAGAAGTACTGTAGACAATGCCCATTGAGGTGTCCCTGAACAATTTTCAGGTCTGGGTCTGCTGGCTCTCAAACACTAATTAAGTCAGTAAAAAACACCTTGTATGTCATCGGAGATCAGATAATTAATCTGATTATGGTAGCCGAATATTATATGGCTCTGGTTCGT…	ACATAAAAAAGCTAGAGGCTAACTGATCCATCCATTAACATTAAGAAAAAGACATACATATGTAAAAGATAAATAGATAATTTTATCTGATCTTCCGAGAAAGCTCTAGTTAGCCTGGATGGTTCTGTATATGAGAGATTATATATGTAATCTTGAGATGGTGACAACCTAATTAATTAATTAATTAACAAGCAAGCATCCAGGCTAATAAACCAGTGACTGCTAATAAACCAGAAGTACTGTAGACAATGCCCATTGAGGTGTCCCTGAACAATTTTCAGGTCTGGGTCTGCTGGCTCTCAAACACTAATTAAGTCAGTAAAAAACACCTTGTATGTCATCGGAGATCAGATAATTAATCTGATTATGGTAGCCGAATATTATATGGCTCTGGTTCGT…
290	Chr01	21176054	22166610	A	ATATATATATATATATATATATATATATATATATATATATATATATATAT	49	GCGGCGGCGGCGGCGGCGGCGGCGGGGGGTTGGTGGTGCCGGAGATCAAGTTCACCAAGCTCTTCATCAACGGCCAGTTCGTCGACGCCGCCTCGGGTAATATATAGATATATGCCTCATCGTCATTGATTAACTTAATTAATTAATTAATTAATTCCCATGGTTTCCTTACAAGATAGGCGTACTGCTACACGTTTCATCGTCTTTGATTATAATTTTTCATCCTTATGTGTGTTTCTACCCATTCTCTTTCCAGCTATCTGATACGAGAAATTTAATTTACCATACCCGAGGTACCAGTACTTAGGATATTTAGGAAGTACCAAAGTTTATATAAAAAATATGATACCAATACAACTTAATTCAGAACTGTCTCTAATATTTATAGGAAACTATTTA…	GGCGGCGGCGGCGGCGGCGGCGGGGGGGGGTTGGTGGTGCCGGAGATCAAGTTCACCAAGCTCTTCATCAACGGCCAGTTCGTCGACGCCGCCTCGGGTAATATATAGATATATGCCTCATCGTCATTGATTAACTTAATTAATTAATTAATTAATTCCCATGGTTTCCTTACAAGATAGGCGTACTGCTACACGTTTCATCGTCTTTGATTATAATTTTTCATCCTTATGTGTGTTTCTACCCATTCTCTTTCCAGCTATCTGATACGAGAAATTTAATTTACCATACCCGAGGTACCAGTACTTAGGATATTTAGGAAGTACCAAAGTTTATATAAAAAATATGATACCAATACAACTTAATTCAGAACTGTCTCTAATATTTATAGGAAACTATTT…
291	Chr01	21203712	22231090	AGTCCTCTACACCAATACTGTACACAGAGTTCATTA	A	35	TCTAATAAATCATGGAGTATATATATTTCTACTTTAGCTGGAATACATAGCAAACAAATTAAAAGATATATTGATAAATCTAGATATATTGATAAATCTAGAAATACTAACATAACATATAATTTTAAAATGTGTTACCTCTTTCTAGACATTTACACTGCTCTTGAAGGATGGGATCAAACTCATCTCATGTTAAGCTTACATGGTTGCACTGCTCAACCTATGCACATATAGCTAATTTCGCAAGAAAACAAAAAATTGAGTAAATAACAGATGCACTATTGAAATGATAATATTCATTCAATAATTTAGTTCACATTAAACTATAAACAGAAGTGAGAAACACAAAAAATTTTGGGTTCATAACACGATGTAACAAAAGTAAACATCACCAAATCC…	TCTAATAAATCATGGAGTATATATATTTCTACTTTAGCTGGAATACATAGCAAACAAATTAAAAGATATATTGATAAATCTAGATATATTGATAAATCTAGAAATACTAACATAACATATAATTTTAAAATGTGTTACCTCTTTCTAGACATTTACACTGCTCTTGAAGGATGGGATCAAACTCATCTCATGTTAAGCTTAGATGGTTGCACTGCTCAACCTATGCACATATAGCTAATTTCGCAAGAAAACAAAAAATTGAGTAAATAACAGATGCACTATTGAAATGATAATATTCATTCAATAATTCAGTTTACATTAAACTATAAACAGAAGTGAGAAACACAAAAAGTTTTGGGTTCATAACACGATGTAACAAAAGTAAACATCACCAAATCC…
292	Chr01	21208707	22236809	GATTTGTGTGTCAAAGGATGAATTAAACACTCTAC	G	34	CGCCTTCCTCGCCCGCCAAAATCTCTCTCGCGCGCGTTGAAATAGCCCCCACCCCTGCGTTCCCCATCCAACCATATTTCGATCTGGCCACCATGTCGCGGCAGGCACGGAAGGAGGCGGCGGCGCAAGATATGCTGAAGTTGGATGCGGCTTGGATGCGCAAGCCAGCTGCATCGCAATCTCGAAAAGGTGCGGTGGCACCGATGCGGAAGGCCCAGGGAGGAGCTCGGGCGGCGTCGATGGTGCCGGAGCAGAGCAGTTCAGGGTTGGCGGCGCATGTGCCAGAGCACCGGAGTTCAGGATATGGCGCGGCTAGTCCACCACCAAGCTCCTTCACCGACTGCAGCTACTTCTTCTAAGATCATTTCATATATAAATATATATAATTATTATATACAT…	CACCTTCCTCGCCCGCCAAAATCTCTCTCGCGCGCGTTGAAATAGCCCCCACCCCTGCGTTCCCCATCCAACCATATTTCGATCTGGCCACCATGTCGCGGCAAGCACGGAAGGAGGTGGCGGCGCAAGATATGCTGAAGTTGGATGCGGCTTGGATGCGCAAGCCAGCTGCATCGCAATCTCGAAAGGGTGCGGTGGCACCGATGCGGAAGGCCCAGGGAGGAGCTCGGGCGGCGTCGATGGTGCCGGAGCAGAGCAGTTCAGGGTTGGCGGCGCATGTGCCAGAGCACCGGAGTTCAGGATATGGCGCGGCTAGTCCACCACCAAGCTCCTTCACCGACTGCAGCTACTTCTTCTAAGATCATTTCATATATAAATATATATAATTATTATATACAT…
293	Chr01	21312013	22345668	GTCCATGCCTTGTTTATAAGGGGGTGATTATGA	G	32	CTATTCAACTATTGCATTTATTTTTGAATGTCATTGGGTGGAATTAACCTATTGTTTGTTATAGCCCTTTTGTTCTTGTTTACCTTATTCCTTGATACCTTGGGTTATTATAACTTGACTAGTTGAGCTTTACATATTGGTTCAACTAGATATTAGATATGATTGCTTAGCCATTCTTAGAAACATTAGCACACTATTGGGATAACTTATGACTCACTATTATTTAATGATGGCTTAATGATAGTTCACGATGGTCAATCGTGATTGGTTAATTAATTACTTGCCAACTAAAACTTGATAATGGTGGGTTGTGAGCACATGGTTTTGAGAGTTGTGCTCATGGCAATTAAGGACCGGTTCACGAGTTTCGGTTGTGAAACATTAACCGTGCCAACCACA…	CTATTCAACTATTGCATTTATTTTTGAATGTCATTGGGTGGAATTAACCTATTGTTTGTTATAGCCCTTTTGTTCTTGATTACCTTATTCCTTGATACCTTGGGTTATTATAACTTGACTAGTTGAGCTTTACATATTGGTTCAACTAGATATTAGATATGATTGCTTAGCCATGCTTAGAAACATTAGCACACTATTGGGATAACTTATGACTCACTATTATTTAATGATGGCTTAATGATAGTTCACGATGGTCAATCGTGATTGGTTAATTAATTACTTGCCAACTAAAACTTGATAATGGTGGGTTGTGAGCACATGGTTTTGAGAGTTGTGCTCATGGCAATTAAGGACCGGTTCACGAGTTTCGGTTGTGAAACATTAACCGTGCCAACCACA…
294	Chr01	21366161	22401311	AAACATCACGCAAACATACTATATCTTTATAGTTTTTATAATTT	A	43	CGAAGTTCATATGGAGAGCAGTTCAGTTCTCTTTTAGTTTTAATCTTCCAGTTAACATATCTCATATTTTTAATGGGTGTCTTTTGGGAGTTGATAAGAAAAAGAGTAAACTGATACTTGTTGGAGCTTTTGCCATTTGTTGGGCAATATGGCTGAGTAGGAACGATATGGTTTTTGATAAATCACCATCATTTTCCTATATGCAGGTCATTTTTAGGACAACTCATTGGCTCCAGTTTTGGGCACAACTACAAAGGTATGATGAAGATGAAGAGTTTCTGAAAGTTGCATGTCGAAAGTCGGAGACTACGGTTATGCAACTTTTTGCTAATTATGGTTGAGGATTTACAAATCCTATCTTACTATAAAGTTATCCCCCACTAACTCCTTAAGCTTAAC…	TTGCGAAGTTCATATGGAGAGCAGTTCAGTTCTCTTTTAGTTTTAATCTTCCAGTTAGCATATCTCATATTTTTAATGGGTGTCTTTTGGGAGTTGATAAGAAAAAGAGTAAATTGATACTTGTTGGAGCTTTTGCCATTTGTTGGGCAATATGGCTGAGTAGGAACGATATGGTTTTTGATAAATCACCATCATTTTCCTATATGCAGGTCATTTTCAAGACAACTCATTGGCTCCGGTTTTGGGCACAACTACAAAGGTATGATGAAGATGAAGAGTTTCTGAAAGTTGCATGTCGAAAGTCGGAGACTACGGTTATGCAACTTTTTGCTAATTATGGTTGAGGATTTACAAATCCTATCTTACTATAAAGTTATCCCCCACTAACTCCTTAAGCTT…
295	Chr01	21375846	22409952	C	CACACACACACACACACACACACACACACACAT	32	CGATTCAAATTCAAATTCAGATTCAAATATTATATATATATATATAGAATATTTCTATACATAAAGTTTATGCGTGCAAAGTTTATGATATAAAGTCTATGCACATGAATGAAAGTATTAGATTTTTTTCTATTTTTTACTAACTTTGTTTTTTTTTTGAAATTTATGATGAAAGGAGAGAAGGGAGAAGAGTATGGAGGGAGGGCGGGTTGATCGCTGGGAACGATCACCCGCCCATTAGGGGCACCCGTATCTAGATATCTAATTACATGTGTTAATTAAGAACTTTCTTTGGGAAAAAAAAAACATCTTAGACCCCATGTCCCATGCACAAGGGTGGAACAATGTGGTGTTGCCATATGTAAACTAAATAAGTAGATAAATTAGATAAAATATGAT…	TATTCGATTCAAATTCAAATTCAGATTCAAATATTATATATATATATAGAATATTTCTATACATAAAGTTTATGCGTGCAAAGTTTATGATATAAAGTCTATGCACATGAATGAAAGTATTAGATTTTTTTCTATTTTTTATTAACTTTGTTTTTTTTTTGAAATTTATGATGAAAGGAGAGAAGGGAGAAGAGTATGGGGGGAGGGCGGGTTGATCGCTGGGAACGATCACCCGCCCATTAGGGGCACCCGTATCTAGATATCTAATTACATGTGTTAATTAAGAACTTTCTTTGGGAAAAAAACATCTTAGACCCCATGTCCCATGCACAAGGGTGGAACAATGTGGTGTTGTCCATATGTAAACTAAATAAGTAGATAAATTAGATAAAATATGAT…
296	Chr01	21377080	22411217	T	TATCTATGACGGGCATTAACTATAGCCCGTCACAGATGAGTC	41	ATATTTTTTTATATATGTTTTAAAAAAGGACCCCTGAATTATTTTTAAAGGGCATTGTTCAATTTATAGTTTGCTATTTATGAGACAATTTCTGAATAAAGTATAATCTTACCTTTCAACGATATAAATGCCCGCGCGTCGCATACGCGCAGGCTACTTTCCTAGTTAGTAATATAATAAGTCATCAGTAATAAAAGACCAACAAATTCAAACTGAATGTTGTTTTATACATAATGTGTCACTAGAACGGATACCCTCATCTCAATCGGGCGGTAAGCCCCATCTCAATCGGGCATGGCGTCCGTCACAGGCTAGAAGTCACTGATGTGAAGAGTTATCTCAATCGGGCAAACAGCCGTCACGGATGATTCTATCTCAATCGGGCCCTAAGTAAAGCCC…	AATATTTTTTTATATATGTTTTAAAAAAGGACCCCTGAATTATTTTTAAAGGGCATTGTTCAATTTATAGTTTGCTATTTATGAGACAATTTCTGAATAAAGTATAATCTTACCTTTCAACGATATAAATGCCCGCGCGTCGCATACGCGCAGGCTACTTTCCTAGTTAGTAATATAATAAGTCATCAATAATAAAAGACCAACAAATTCAAACTGAATGTTGTTTTATACATAATGTGTCACTAGAACAGATACCCTCATCTCAATCGGGCGGTAAGCCCATCTCAATCGGGCATAGCGTCCGTCACAGGCTAGAAGTCACTGATGTGAAGAGTTATCTCAATCGGGCAAACGGCCGTCACGGATGATTCTATCTCAATCGGGCCCTAAGTAAAGCCC…
297	Chr01	21410312	22444174	A	ATTATTATTATTATTATTATTATTATTATTATTATTATTATTA	42	ATGGGAGAGATATTTTTTTATAGTGAAAATTAATTCAGCCTCTAATTAAAACAAAAGATCTATATGTATCTGGCCAGCTTATAATTCCTTTGCATAGAATTGCTAAACTAGAAAACGTTGGATAATCTCTAGTACATGTATATACATTTGGCTCTCACAGAATAGGTACTCTGCATATATATGTTTACAGACGTGGTTGGTCTAGCTTGATTAGCTGGCAGCAAATTCAGAGTTGTCTACAAATTAGCCTACCAAACAGTACTAATCACATGTTTAGAGAGACATCAGGATCATGGAGCTTTTCAACAAAAATGCATGGTAGTAGGTCTAGCCGCAATATATAGGTTATTTGTGAACTAAAATTTTGTGTTTTTATCACCTGTTACATCATATTGCTTT…	ATGGGAGAGATATTTTTTTATAGTGAAAATTAATTCAGCCTCTAATTAAAACAAAAGATCTATATGTATCTGGCCAACTTATAATTCCTTTGCATAGAATTGCTAAACTAGAAAACGTTGGATAATCTCTAGTACATGTATATACATTTGGCTCTCACAGAATAGGTACTCTGCATATATATGTTTACAGACGTTGTTGGTCTAGCTTGATTAGCTGGCAGCAAATTCAGAGTTGTCTACAAATTAGCCTACCAAACAGTACTAATCACATGTTTAGAGAGACATCAGGATCATGGAGCTTTTCAACAAAAATGCATGGTAGTAGGTCTAGCCGCAACATATAGGTTATGTGTGAACTAAATTTTGTGTTTTTATCACCTGTTACATCATATTGCTTTA…
298	Chr01	21418394	22451436	T	TCGGGGATACAGACTTGATGACATACTATATCTTG	34	CCATGTTGGGTGTTGGCCAGATGGATCGGTGCATTCTGCATTGCAGGGCACTCTTCAATGATGTTTATGCATTGCTTCTGTAAGAGTGTATATATGTTTTTTTGGGCATTTGCTAAGTTCATTTGCACTTCAAGCTGAATATGATGTGAGGCATCTGACTTCTGATGGATTCACTTAGTTATGATTCAGACGAGTATAGTATCTGGGTAATCGGGGCAGAACATTGAGTATAGTGTTTCTTTGTACTTGACCTGGATATGATTGAAGGATAATTTTTTTAGATAAAACCTGGCCTTTACATGATTGAAAGTTCATTTTATTTTTGGATTGATGAGCTATTGAATCAACTAATTTCTGATTGTACTATCAGGCAATAGTGCATCAAACCATCTCAATTTT…	TTGGGTGTTGGCCAGATGGATCGGTGCATTCTGCATTGCAGGGCACTCTTTCTTCAATGATGTTTATGCAATGCTTCTGTGAGAGTGTATATATGTTTTTTTGGCATTTGCTAAGTTCATTTGCACTTCAAGCTGAATATGATGTGAGGCATCTGACTTCTGATGGATTCACTTAGTTATGATATCAGACGAGTATAGTATCAGGGTAATAGGGGCAGAACATTGAGTATAGTGTTTCTTTGTACTTGACCTGGATATGATTGAAGGATAAATTTTTTTAGATAAAACCTGGCCTTTACATGATTGAAAGATCATTATATTTTTGGATTGATGAGCTATTGAATCAACTAATTTCTGATTGTACTATCAGGCAATAGTGTATCAAACCATCTCAATTTT…
299	Chr01	21532969	22550896	G	GTTCTATCATGACAAAGATGTCACTCGCCCT	30	GAAAAGCTATCCGAAAATATACAGAAGCCAATCTCAGATTCGCAGCCATTTTCGGAATTTCCGAAATTTTCGGAGTTTCCAATAATTTTTCGGAGTTTCCGAAAAGCACAGAGTAAAATGACTATAACTTTTCGCTCGGGAGTCCGTTTTTGATGAACTTGGACTCTATGGAAAGCTCACTCAGAGGACTACCCAACTCAACAAAAAACGAGGTCTAAAACCACTCAAAGGATAGGTTAAAGCTTGGGTTTCTCTCAAGGTAGAATTATAATAGGTCACTTTGAGCACCGAGACATACGCAAACATATCGACGTTGCATCCCTCTTAATAGTACGGCATTCCTAAACTCAAATATAAATAGCAAGAGAATTATACCAATAGGAATGCCTTCTTTTCATC…	GAAAAGCTATCCGAAAATATACAGAAGCCAATCTCAGATTCGCAGCCATTTTCGGAATTTCCAAAATTTTCGGAGTTTCCAATAATTTTTCGGAGTTTCCGAAAAGCACAGAGTAAAATGACTATAACTTTTCGCTCGGGAGTCCGTTTTTGATGAACTTGGACTCTATGGAAAGCTCACTCAGAGGACTACCCAACTCAACAAAAAACGAGGTCTAAAACCACTCAAAGGATAGGTTAAAGCTTGGGTTTCTCTCAAGGTAGAATTATAATAGGTCACTTTGAGTACCGAGACATACGCAAACATATCGACGTTGCATCCCTCTTAATAGTACGGCATTCCTAAACTCAAATATAAATAGCAAGAGAATTATACCAATAGGAATGCCTTCTTTTCATC…
300	Chr01	21598709	22607722	TCAGGAGAAAGAGCCCCCCCCCCCCCCCCCCC	T	31	TATGGACTTGGTAGTACGGGTAGGGATAGCTTGTGCTTGTGCACACAGCACGTCGTCCACAGACCAGTGTGGAAATTTCTCCACTGCACGCCTCCATGTGCCGCCTCGACCCGTCGACCGTGCCCGGTGCAACGGACGGCACATGCCGTATGCACACCCAGACCACGGCCGTTGTCTCTTCTCCCCGGAAAAAACCACGGGAGGAGGTTTACGTTTTTCTCACGGATCAGTTCACTAGCCAGCCCCCTATAGCTCCTGCTCGCGGCCGCGGCACGCGCGCGGCGTGGTGCCAACCAGATTACCGGAGCAAGGCGTGGCGTGCGCGGCTCCCCCCTCTTCCGGCAACGAATCCCGCGCCCCGATCTGGGACGGTGACGCTCTCGATCGGTCGGTTTCGCA…	CTACTTTATGGACTTGGAATAGTACGGGTAGGGATAGCTTGTGCTTGTGCACACAGCACGTCGTCCACAGACCAGTGTGGAAATTTCTCCACTGCACGCCTCCATGTGCCGCCTCGACCCGTCGACCGTGGCCGGTGCAACGGACGGCACAAGCCGTATGCACACGCAGACCACGGCCGTTGTCTCTTCTCCAAGTCCCCGGAAAAAACCACGGGAGGTTTACGTTTTTCTCACGGATCAGTTCACTAGCCAGCGCCCCCTATAGCTCCTGCTCGCGGCCGCGGCACCGGCACGCGCGCGGCGTGGTGCCAACCAGATTACCGGAGCAAGGCGTCGCGTGCGCGGCTCCCCCCTCTTCCGGCAACGAATCCCGCGCCCCGATCTGGGATGGTGACGCTC…
301	Chr01	21723983	22731789	GCAGCCGCGGCGGACTCGATGCGACGCGACGG	G	31	GACAGTTTTGTACTTTCGTCTTTATTCTGTGTCACGCACGCACACGGCATCTCTTCCTCCTCTGTCTTTGCATCTCACAGGGCAGGAGCAGTGTTGAACTAACCGGCGGCGAGAGATGGCGGCGGGAGCAGGGGCATATAGGTCCCGAACCCTAGATCGGAAACCCGACGGCGGCCCAGATCGGCGATGGGTGGCGGGAGGACCGGGATAGCTGCAAGCTGCGTCGGGAGCTTGATGATGGTTGCGGCGACGAATCATCGGCGACGGCGGCCGTGGCGATGGTTGCGGTGGTGATTCGTCGGAAGCTCGATGTGACGGTGGCCGCGGCGGGCTCGATGCGACGGTGGCCGCGGCGGGCTCGATGCGACGCGACGCCGACACGGAGATGCGGCAAAGGGA…	GGGCAGTTTTGTACTTTCGTCTTTATTCTGCGTCACGCACGCACGCGGCATCTCTTCCTCCTCCGTCTTTGCATCTCACAGGGCAGGAGCAGTGTTGAACTAACTGGCGGCGAGAGATGGCGGCGGCAGCAGGGGCATATAGGTCCCGAACCCTAGATCGGAAACCCGACGGCGGCCCAGATCGGCGATGGGTGGCGGGAGGACTCGGATAGCTGCAAGCTGCGTCGGGAGCTTGATGATGGTTGCGGCGACGATTCATCGGCGACGGCGGCCGTGGCGATGGTTGCGGCGGTGATTCGTCAAAAGCTCGATGTGACGGTGGCCGCGGTGGGCTCGATGCGACGGTGGCCGCGGCGGGCTCGATGCGACGCGACGCCGACACGGAGATGCGGCAAAGGG…
302	Chr01	21893466	22887640	ATATATATTATATATATATATATATATATAT	A	30	AATAAACTCTAATCACAAGATGTTATAGGGTGAATTGGTTAGTAGAGCATTTCTTTGAACCATGAGGTCACGGGTTCAAGTCTTGGTTTTGTCACTTTAATTTTTAAATTTCTCTCCAAGGTGTGATAGATTTAATTTTTAAATTTCTCTCCAAGGTGTGATAGAAGAGGGAGAAAGAGGGCGCCAGATCGTGAAAAAGAGAAAAACAAGAAGGGAGGGAGAGAGAGAAAAGAGGGGGCACCGGGAGAGAGAGAGTGAGAGATCGAGAAAAAAAACAGGAGGAGAGAGAGAGAAAAGAGGGGGCGCCGGGAGAGAGAGATCGAGAAAAAAAATCAGGAGAAGGAGAGAGAGGGCGCCGCCATCAAAGGGAGGGGGCGCGGGATGGGAATCGGGGAGGAG…	AATAAACTCTAATCACAAGATGTTATAGGGTGAATTGGTTAGTAGAGCATTTCTTTGAACCATGAGGTCACGGGTTCAAGTCTTGGTTTTGTCACTTTAATTTTTAAATTTCTCTCCAAGGTGTGATAGATTTAATTTTTAAATTTCTCTCCAAGGTGTGATAGAAGAGGGAGAAAGAGGGCGCCAGATCGTGAAAAAGAGAAAAACAAGAAGGGAGGGAGAGAGAGAAAAGAGGGGGCACCGGGAGAGAGAGAGTGAGAGATCGAGAAAAAAAACAGGAGGAGAGAGAGAGAAAAGAGGGGGCGCCGGGAGAGAGAGATCGAGAAAAAAAATCAGGAGAAGGAGAGAGAGGGCGCCGCCATCAAAGGGAGGGGGCGCGGGATGGGAATCGGGGAGGAG…
303	Chr01	22071613	23101001	AACAGTGGCAAGCGTTTTGAATTCCTTTTTGACGAA	A	35	GGGTTACGCACATGCTTTGACACAGGTCCCACACCACAAAAAACCAATGTGGTTTAAGGGGAGGACGTGTTTCCATTGGTTTTAATAGTTGAGGGACGAAAGATGATAGGTCAATGTTCAAGGAGGTTTTCTGAATCTAAATTGTACTCGAATGGTCAAGAATGGAGTTGTTCCAAAGAAAATATGTCCATACCAGTGCATTTGCTGGAGACGTCAAACTTCCAGCACCATCAGAGCCAAACATTACCAATGGTTTTGCGGAACCACCATTCTGCTGCAGCTGTGGCATAGACATTGCATCTCCCGGTGTATGAGTGGAAGGCGTTGATGGTGCAGAACTTGGAGAAGGGCCAGCAGTATTTGCAGTTCCTGAACTATTGGCTCTACCAGAGGATGAAC…	GGGTTACGCACATGCTTTGACACAGGTCCCACACCACAAAAAACCAATGTGGTTTAAGGGGAGGACGTGTTTCCACTGGTTTTAATAGTTGAGGGACGAAAGATGATAGGTCAATGTTCAAGGAGGTTTTCTGAATCTAAATTGTACTCGAATGGTCAAGAATGGAGTTGTTCCAAAGAAAATATGTCCATACCAGTGCATTTGCTGGAGACGTCAAACTTCCAGCACCATCAGAGCCAAACATTACCAATGGTTTTGCGGAACCACCATTCTGCTGCAGCTGTGGCATAGACATTGCATCTCCTGGTGTATGAGTGGAAGGCGTTGATGGTGCAGAACTTGGAGAAGGGCCAGCAGTATTTGCAGTTCCTGAACTATTGGCTCTACCAGAGGATGAAC…
304	Chr01	22115843	23145190	GCGCTGCAACTGCTGTTATTACAACCGCTGTAACTA	G	35	TGGCCTATTTTGGTTGTAATTTTCAAGGACTTTGCAACCTGTTGCATTCGTGTTCTTTTTAAGCTATAGCACCTATTTGCACTTAAATACAATTTTGTGCACCATGGACACTATTTACTCGAACAAAGAGTACCACATTTATGAAAACTAAGTGTGTAAATACAGCAATTCATGATTAGAGTTTTAGCACAGGTTCTTCCGTTGAAATGATAAAAGTAATGATCATAAGATGTTGCTCGCATTATTGGGACTAGATCCTCACGCATCCTCTTTATTGTCGACAAATTATTTCACTAAATTCATCTAATAATTATTTTTAGTCAATAGGCATTATTCCCTAAATATTTCATCATATCTCAGGTCCAGAGTTTCTTTTAGATTGATTTTCAAAGATTTATT…	GTGGCCTATTTTGGTTGTAATTTTCACGGACTTTGCAACCTGTTGCATTCGTGTTCTTTTTAAGCTATAGCACCTATTTGCACTTAAATACAATTTTGTGCGCCATGGACACTATTTACTCGAACAAAGAGTACACATTTATGAAAACTAAGTGTGTAAATACAGCAATTCATGATTAGAGTTTTAGCACAGGTTCTTCCGTTGAAATGATAAAAGTAGTGATCATAAGATGTTGCTCGCATTATTGGGACTAGATCCTCACGCATCCTCTTTATTGTCGACAAATTATTTCACTAAATTCATCTAATAATTATTTTTAGTCAATAGGCATTATTCTCTAAATATTTCATCATATCTCAGGTCCAGAGTTTCTTTTAGATTGATTTTCAAAGATTTATT…
305	Chr01	22120094	23148791	TCCTCTAACACAAAATTAATGGCTGCCATTTAAAATAGCT	T	39	GATTTGGTGCCGTCAACCTCAGTCCACCACTACATACCCAAGGCACGAGTGTTTGACATGCCCTTAATTACCATCTTCTCTCGTAGCATCGATTTCTTCTCGCCGCAACTCACCAAGTGAGAAATCAGCTTTCCCTTGTACTTCTCCATAATGCCCTTAGACTTTATGCTCACTCAAATATAAAAAGGTTTAACTTACTAACAAATAAAAAATGTTAATATTTGATTAATTAAAATGACATCAATTATTTGTTTTAAAAATTTTCTTTTTTGTGCATCAATGTTATTACTCATGGTAGTCATCAAGATTTGGTTAAACTTCAAAACTTTAACCATCAATAGTTTTTCAAATGCTTAGTTTAAATCTATTTTTAAAAATCAAATAAACCTATTTTTTAAA…	GATTTGGTGCCGTCAACCTCAGTCCACTACTACATACCCAAGGCACGAGTGTTTGACATGCCCTTAATTACCATCTTCTCTCGTAGCATCGATTTCTTCTCGCCGCAACTCACCAAGTGAGAAATCAGCTTTCCCTTGTACTTCTCCATAATGCCCTTAGACTTTATGCTCACTCAAATATAAAAAGGTTTAACTTACTAACAAATAAAAAATGTTAATATTTGATTAATTAAAATGACATCAATTATTTGTTTTAAAAATTTTCTTTTTTGTGCATCAATGTTATTACTCATGCTAGTCATCAAGATTTGGTTAAACTTCAAAACTTTAACCATCAATAGTTTTTCAAATGCTTAGTTTAAATCTATTTTTAAAAATCAAATAAACCTATTTTTTAAA…
306	Chr01	22164902	23191469	AGTAGCCACTAGCGATGATGTGTGTTTTTAAAAGAAAAG	A	38	GGACTGAATTTGAATATATTTAAACCACATTAAAAAAAGGAAAATCAAAAAATTTCGGCCGAGATAGTTGCTTGCTTGGGGGGTCCAAAATTTCGAACCAAAATCTCTAACCTTGGGTACAAGGTTTTTCTTTATGCATGTTCTAAAAGTCAAGGATGAATAATAACCGATTTTATAGTTTAGGGTGGAAGTAGACTTTGAGAAAGGTTCAAGGGCTAAAACTAGACTTTTCCCTTTTTAAAAATCTAGGTTATGAGTTGAGAGACCAAAATTGATTACATTAAAACATATTTATATGGACTATTAAAGTAAGAAAGATTGTTATAAACCACACGTACATATATATACGGTTTTGCTAAAAAACTTTCGATAAATTTATTTTCTCAAAACTTTCAAATT…	TTTGGACTGAATTTGAATATATTTAAACCACATTAAAAAAAGGAAAATCAAAAAATTTCAGCCGAGATAGTTGCTTGCTTGGGGGGTCCAAAATTTTGAACCAAAATCTCTAACCTTGGGTACAAGGTTTTTCTTTATGCATGTTCTAAAAGTCAAGGATGAATAATAACCGATTTTATAGTTTAGGGTGGAAGTAGACTTTGGGAAAGGTTCAAGGGCTAAAACTAGACTTTTCCCTTTTTAAAAATCTAGGTTATGAGTTGAGAGACCAAAATTGATTACATTAAAACATATTTATATGGACTATTAAAGTAAGAAAGATTGTTATAAACCACACGTACATATATATACGGTTTTGCTAAAAAACTTTCAATAAATTTATTTTCTCAAAACTTTCAA…
307	Chr01	22164944	23191473	AAGTTAAATACTAGTTATATAATAGTTACATTG	A	32	AATCAAAAAATTTCGGCCGAGATAGTTGCTTGCTTGGGGGGTCCAAAATTTCGAACCAAAATCTCTAACCTTGGGTACAAGGTTTTTCTTTATGCATGTTCTAAAAGTCAAGGATGAATAATAACCGATTTTATAGTTTAGGGTGGAAGTAGACTTTGAGAAAGGTTCAAGGGCTAAAACTAGACTTTTCCCTTTTTAAAAATCTAGGTTATGAGTTGAGAGACCAAAATTGATTACATTAAAACATATTTATATGGACTATTAAAGTAAGAAAGATTGTTATAAACCACACGTACATATATATACGGTTTTGCTAAAAAACTTTCGATAAATTTATTTTCTCAAAACTTTCAAATTTTCCACCGTCAGATGTTCTTTAAGATTCGTGCTACCGAGATA…	GACTGAATTTGAATATATTTAAACCACATTAAAAAAAGGAAAATCAAAAAATTTCAGCCGAGATAGTTGCTTGCTTGGGGGGTCCAAAATTTTGAACCAAAATCTCTAACCTTGGGTACAAGGTTTTTCTTTATGCATGTTCTAAAAGTCAAGGATGAATAATAACCGATTTTATAGTTTAGGGTGGAAGTAGACTTTGGGAAAGGTTCAAGGGCTAAAACTAGACTTTTCCCTTTTTAAAAATCTAGGTTATGAGTTGAGAGACCAAAATTGATTACATTAAAACATATTTATATGGACTATTAAAGTAAGAAAGATTGTTATAAACCACACGTACATATATATACGGTTTTGCTAAAAAACTTTCAATAAATTTATTTTCTCAAAACTTTCAAATTT…
308	Chr01	22200172	23238654	AATATCACTCAGCAGCAAGGTATACAGTTTTTGGGACATGTCACCTA	A	46	AATTTATAGCAAAACTTCACTCATACCTCGTATGAAAATCATATCTACAGACACCAGAATAATTCTGATTTATATAGGATTTGCAATTTTTACCTTCATAAACGCATCAATATCAGCATCAGGCTTAATATTTGCTGCCTTCTCTCGCCTTGACAGCTCGGTCAGCATATCTAATGACATAACAAGAGAACTCTATAAGTATCAGTCAACCCATGACGATTTTCTCAAAAGGCGAATTCTGCAGAAAAGAATGCATGCACTTGTGGTTGTTCCTTGCACATAGTCATACCAAAGCGGCTTCCAACACCCTGGCAGCGTGCCGAGAATGAGAGTGTCTCCCGAACAGTCATTTCCCCAATATGAAGATCATGCTGGCTGATGTATGCAGCTGTCCTCTGT…	AATTTATAGCAAAACTTCACTCATACCTCGTATGAAAATCATATCTACAGACACCAGAATAATTCTGATTTATATAGGATTTGCAATTTTTACCTTCATAAACGCATCAATATCAGCATCAGGCTTGATATTTGCTGCCTTCTCTCGCCTTGACAGCTCGGTCAGCATATCTAATGACATAACAAGAGAACTCTATAAGTATCAATCAACCCATGACAATTTTCTCAAAAGGCGAATTCTGCAGAAAAGAATGCATGCACTTGTGGTTGTTCCTTGCACATAGTCATACCAAAGCGGCTTCCAACACCCTGGCAGCGTGCCGAGAATGAGAGCGTCTCCCGAACAGTCATTTCCCCAATATGAAGATCATGCTGGCTAATGTATGCAGCTGTCCTCTGT…
309	Chr01	22469342	23502302	A	AGGGGCGGGGGCGGCGGCGGCCGGGCGGGCGA	31	TAATCCTCCATATCCTCATATGGATGGCCATCCAAAAAAGATTCCTTCTTCATATACCTTCCTACTCCAATAGATCATCCATATTACATCCTCCATATTACAACCTCCTATATTTTACTAATATCTTCCAACTAACCATATATTTGTGTTATTTTTTAAGGGCTATATCTTGAACAACTAAATTTTAACGGTGTTATTTATCACGATAATGTAAATAAGTGTATTTTAACCTATATATTTTTAATGGATAATTTAATGCATTAAATTGTGACTTTCTCCCAGACTATATTTCTCTTTTTCTCTCCTTTTCTATTCCTCCTTCTCTCTGCTTCTTTCTACACTCTTCTCCATTCTTTCCCCTTCTCTCTTCTGCCGACTGCCGCAACTCTCCTCTCCTCT…	AAATTTAATCCTCCATATCCTCATATGGATGGCCATCCAAAAAAGATTCCTTCTTCATATACCTTCCTACTCCAATAGATCATCCATATTACATCCTCCATATTACAACCTCCTATATTTTACTAATATCTTCCAACTAACCATATATTTGTGTTATTTTTTAAGGGCTATATCTTGAACAACTAAATTTTAACGGTGTTATTTATCACGATAATGTAAATAAGTGTATTTTAACCTATATATTTTTAATGGATAATTTAATGCATTAAATTGTGACTTTCTCCCAGACTATATTTCTCTTTTTCTCTCCTTTTCTATTCCTCCTTCTCTCTGCTTCTTTCTACACTCTTCTCCATTCTTTCCCCTTCTCTCTTCTGCCGACTGCCGCAACTCTCCTCT…
310	Chr01	22689597	23722309	AGTACCGGTTCTATAGCCGATATATATTGGTCGACACCTTTATTTTAAACGTT	A	52	GCTGATCACGGTCACGGAGCCGGCCAGTCGTCGGCTCGTCGCAGCCGCAGCAGCAGCATTCCCCATGCACACGCACCACCACCACCACACGAGCAGAGCAGAGCAAGCAGGACAGCAGGTGCGGTGCCGTCAATCTCGAGGCAAACCACGTGCCTCCCGCGTCCCGCCCCGGCCGGTCCATCCTCCCCCGCCCCGCCCCGCCCGTCAGAGGCGGCAGCGAATCTCTTCACCAGGATAAGTTACGCCGCGCGTTTGCATGCCTATGCCAATGCGTAGCACCACCGCGCCGGCGACCGCCGATCGATCATGTGGCTCACTGCCTCTCGCCACTCGCCAGCACGCGCGGTCACGGACTTCTACGGAGTTAGGAGTACTCTACCACAGCACTTCAAAAAGGTA…	GCTGATCACGGTCACGGAGCCGGCCAGTCGTCGGCTCGTCGCAGCCGCAGCAGCAGCATTCCCCATGCACACGCACCACCACCACCACACGAGCAGAGCAGAGCAAGCAGGACAGCAGGTGCGGTGCCGTCAATCTCGAGGCAAACCACGTGCCTCCCGCGTCCCGCCCCGGCCGGTCCATCCTCCCCCGCCCCGCCCCGCCCGTCAGAGGCGGCAGCGAATCTCTTCACCAGGATAAGTTACGCCGCGCGTTTGCATGCCTATGCCAATGCGTAGCACCACCGCGCCGGCGACCGCCGATCGATCATGTGGCTCACTGCCTCTCGCCACTCGCCAGCACGCGCGGTCACGGACTTCTACGGAGTTAGGAGTACTCTACCACAGCACTTCAAAAAGGTA…
311	Chr01	22917380	23948002	GCGCCTGTGGTGACTTCGTTAGGTTAGGGTGTGCGTGTGTG	G	40	GATATGGTCATATCATATGGAGTATATAATAAGAATTCAGCAACTATACCAGTGAAGGTTTCGACCAGCAAATTGGACCGTGCTCCTGCCTTCTAATTTTGTTTTTTTTATTGAAACACGATATGATGAACAGATAGCATATAAACAACCCGTAACTAATCTTGATACCTCGCACTATAAAACTCGCTGGATGCTAGGAAGAACGATAACCAAATTAAAGTACCAAACAAACCAGGAGACCTCGTGTTACATTCTAGTATTTCATAATACTCATGTGAACATGTGAGCTCACCGCCGCGAAGTGAGTATAGCTCAACTGGTTAGGTTCCTTGTGGTGGAACCAGCCCACCCGGGTTCAAATCCTAGATTTGACATCCTAGATTTGACACCCGTCGACAG…	GATATGGTCATATCATATGGAGTATATAATAAGAATTCAGCAACTATACCAGTGAAGGTTTCGACCAGCAAATTGGACCGTGCTCCTGCCTTCTAATTTTGTTTTTTTTATTGAAACACGATATGATGAACAGATAGCATATAAACAACCCGTAACTAATCTTGATACCTCGCACTATAAAACTCGCTGGATGCTAGGAAGAACGATAACCAAATTAAAGTACCAAACAAACCAGGAGACCTCGTGTTACATTCTAGTATTTCATAATACTCATGTGAACATGTGAGCTCACCGCCGCAAAGTGAGTATAACTCAACTGGTTAGGTTCCTTGTGGTGGAACCAGCCCACCCGGGTTCAAATCCTAGATTTGACATCCTAGATTTGACACCCGTCGACAG…
312	Chr01	22926649	23970029	T	TGTTTAGTTCACGTTAAAATTGAAAGTTTGGTTGAAATTGAAAT	43	GAGCAACGCCCGGGAGGACGGGGTGGTGACGCGGGACGAGGTGGCGGCGGTGGCGAGGGAGCTCATCACGGGGGAGAAGGGCGCCGCGGCGCGGAGGAAGGCGCGGGAGCTGCGGGAGGCGGCGGCCAAGGCCACGCGGGCGCCGGGCGGCCCGTCGCGCCAGGCGTTCGAGGCCGTCGTCGGTGGCGCGTGGAAGAAGGCCGCCGCCGCTGCACGTGACGGTCGTGCCGGCGAGCCCGACGACAACGGAACAGCAGTGACGGCCCAATGATTTGTGTCGGTGTCGGCAGATCGATCGGGTTCGTTCCCTCGCGCGCGCGCGGCGTTGTGGGCTCGTGCGGTTCCCTTCTTCCCCCCGGTTGCAAACACGTTTGTCTGCTTGGTTGGTGGTGGTCTGAT…	GAGCAACGCCCGGGAGGACGGGGTGGTGACGCGGGACGAGGTGGCGGCGGTGGCGAGGGAGCTCATCACGGGGGAGAAGGGCGCCGCGGCGCGGAGGAAGGCGCGGGAGCTGCGGGAGGCGGCGGCCAAGGCCACGCGGGCGCCGGGCGGCCCGTCGCGCCAGGCGTTCGAGGCCGTCGTCGGTGGCGCGTGGAAGAAGGCCGCCGCCGCTGCACGTGGCGGTCGTGCCGGCGAGCCCGACGACAACGGAACAGCAGTGACGGCCCAATGATTTGTGTCGGTGTCGGCAGATCGATCGGGTTCGTTCCCTCGCGCGCGCGCGGCGTTGTGGGCTCGTGCGGTTCCCTTCTTCCCCCCGGTTGCAAACACGTTTGTCTGCTTGGTTGGTGGTGGTCTGAT…
313	Chr01	22930372	23973803	G	GCTGGCATGAGGGTCCCACAGCTTGTCGACCCA	32	AATTCACTCTAGAAGAAATTAATTACCTCCCTTAATTACTTTCATATGTAACGGCTCACTACCGGTTATTTCTTACGTCGGTTCACGAATGTTGAACCGTTAGTGGTACCCCCAAAAAAAAATAATCATCCACACCATATACTAATCGCCATCATTGTGCTGAGGATGCCTTGCCTGTAATCGTGGTTGTCGTCATTGTCAATGTAGCCACTATTACACCATCGCCATCGCTGCGCACGAAGATGAGAGAAGGATATCTTTCATAAAGTTTATTAATATCCGAAGTCACTGCTTTATCCCTGGACCCATAAACAATGGGTCTTAATTCAGGAGAAAGAACCAGCAATAAGTACAAAATCCATTCTGGTTCTACATTTGTTTGAATAAAATATTTCACCA…	TAATTCACTCTAGAAGAAATTAATTACCTCCCTTAATTACTTTCATATGTAACGGCTCACTACCGGTTATTTCTTACGTCGGTTCAGGAATGTTGAACCGTTAGTGGTACCCCAAAAAAAAATAATCATCCACACCATATACTAATCGCCATCATTGTGCTGAGGATGCCTTGCCTGTAATCGTGGTTGTCGTCATTGTCAATGTAGCCACTATTACACCATCGCCATCGCTGCGCACGAAGATGAGAGAAGGATATCTTTTATAAAGTTTATTAATATCCGAAGTCACTGCTTTGTCCCTGGACCCATAAACAATGGGTCTTAATTCAGGAGAAAGAACCAGCAATAAGTACAAAATCCATTCTGGTTCTACATTTGTTTGAATAAAATATTTCACCA…
314	Chr01	22942027	23987510	TGGATAAAAATATGGATAAACATCTGTCTAGGTTT	T	34	TTATTACAATTGTTTCACCTTTTTCAGTCCAAGAACAAAGTAAACATAGGAACTGTTGGATACGAGTTAATAAGAGCGGTAAACTAAGTAACTTCACTTGATAAATAGGTAGTCCATTTTTCAATTTTGATTTCTAAAAATTCTTGGTAGCGTTTGAATGTAGATTTAAGGACACCACCCTGTTGTTTTTGGATGAAGAGCCGATGGATGATGGATTTGTTTATATGGATGAAAAATAAATATGATCTAAGCAGTACTGACGTAAAAGAGTTTTAGATAAATCATGTATTTTTTAAAGCACGGGACAAATAATCTGTAAAAGTAATCAATTATCCTAGGCCTCCGTAGATCAATTTATACCAGTAAATAGGATATGCCATACCGGCGTACTTTCTCCGT…	TTATTACAATTGTTTCACCTTTTTCAGTCCAAGAACAAAGTAAACATAGGAACTGTTGGATACGAGTTAATAAGAGCGGTAAACTAAGTAACTTCACTTGATAAATAGGTAGTCCATTTTTCAATTTTGATTTCTAAAAATTCTTGGTAGCGTTTGAATGTAGATTTAAGGACACCACCCTGTTGTTTTTGGATGAAGAGCCGATGGATGATGGATTTGTTTATATGGATGAAAAATAAATATGATCTAAGCAGTACTGACGTAAAAGAGTTTTAGATAAATCATGTATTTTTTAAAGCACGGGACAAATAATCTGTAAAAGTAACCAATTATCCTAGGCCTCCGTAGATCAATTTATACCAGTAAATAGGATATGCCACACCGGCGTACTTTCTCCGT…
315	Chr01	22952865	23998314	CCGCTCCGCCCGCCCCTCCGCCGCTCCGTCCGCCGGCATGCTCCTGCCGT	C	49	CCTCTTCAACTAGAGCCCCTCTTCTTCCTCCTCTCTCTCTCCCTTCTCCCATCCCCGAGGCGGCGGGCAGTGTTCGAGTGAGGGATGGCAGCTCGCGGCGGCCGGGAGAGGAGGGAGGCGGCGCGCGGCCGGGCGAGGAGAGGCGACGTGCGGTGGCCTGGCGAGGAAGGAGGCGGCGCTCGGCGGCCCGACGAGGAGAGGCGACGCGCGGCGGCCTGGCGAGGAGAGAGGCGGCGCTCGGCGGCCCGGCGAGGAGAGGCAGCGCGCGGCGGCCGGGCAAGGAGAGGCAACACGCGGCGGCCGGGCGAGGAGGGAGGCGGCGCTCGGTGGCCCAGCGAGGAGGGAGGCGGCGCGTGCGGCTACCGAGCGAGGAGGGGCGGCGCCGTCCGGCTGGGCATC…	CCTCTTCAACTAGAGCCCCTCTTCTTCCTCCTCTCTCTCTCCCTTCTCCCATCCCCGAGGCGGCGGGCAGTGTTCGAGTGAGGGATGGCAGCTCGCGGCGGCCGGGAGAGGAGGGAGGCGGCGCGCGGCCGGGCGAGGAGAGGCGACGTGCGGTGGCCTGGCGAGGAAGGAGGCGGCGCTCGGCAGCCCGACGAGGAGAGGCGACGCGCGGCGGCCTGGCGAGGAGAGAGGCGGCGCTCGGCGGCCCGGCGAGGAGAGGCGGCGCACGGCGGCCGGGCAAGGAGAGGCAACACGCGGCGGCCGGGCGAGGAGGGAGGCGGCGCTCGGTGGCCCAGCGAGGAGGGAGGCGGCGCGTGCGGCTACCGAGCGAGGAGGGGCGGCGCCGTCCGGCTGGGCATC…
316	Chr01	22957123	24002387	AGTCCAAAATTTAAAAAGTAGAAAAAAAATGGTT	A	33	ACAACATATCATTTTTACTCGCATTTGAGAAAGTTCAATGTTTGGTCTCTTATAGTATTAGCACAAGTATGAATTGCCGTTGAGCTGCTTCTTATTATCAAAGTTTCACTTTATTACTTTCAACTAGTTAACTTTTATGCTTATTGTACTTTGGACCACCTTAATTCTCTATTTTCTAGCAATGTTTAGCCTTACTTTTAGGTCAAAACTAATTTAATTATAAAACTTTTTATGTGTTCGTAGCGATTTAAAAGTCAATGCTGAAAAAGAAATTATGTTGAAAATATCTTAAAATCAACATCAAAACTAAGATTGAAAATTTAAAATTTGTTTTTTTTTTTTGCTTTAGCTTATTAGACAGCCAATGTGTGGTTCTTAGCAAAGATAAGTCTCCCATAT…	ATCATTACAACATATCATTTTTACTCGCATTTGAGAAAGTTCAATGTTTGGTCTCTTATAGTATTAGCACAAGTATGAATTGCCGTTGAGCTGCTTCTTATTATCAAAGTTTCACTTTATTACTTTTATTACTTTCAACTAGTTAACTTTTATGCTTATTGTACTTTGGACCACCTTAATTCTCTATTTTCTAGCAATGTTTAGCCTTACTTTTAGGTCAAAACTAATTTAATTATAAAACTTTTTATGTGTTCGTAGCGATTTAAAAGTCAATGCTGAAAAAGAAATTATGTTGAAAATATCTTAAAATCAACATCAAAACTAAGATTGAAAATTTAAAATTTGTTTTTTTTTTGCTTTAGCTTATTAGACAGCCAATGTGTGGTTCTTAGCAAAGAT…
317	Chr01	22995530	24040697	CAAGCATCTTCGAAGACTGCCGGCAAATCCTGAA	C	33	AAGTGTTACTACCACGAACTAAATCTTGAGAGGAAAGGATTCTGCAGGTGGTGGCGGCAGCTTTGATTGGTCCGCCCGTAAAGTTTTTCAGCGGGGTGGGGTACACGGGGGTTTAGATCTTTATCTTTCGGGGAAAATGAGGCTGTGACTGTGAAAGCTCAGCACAGCCACAGCAGAAGCGTTTCTGTGACCGAAAGGTGGAAAGATCGCAACCGTGGCCGTGCCAAAGTGTGGATGTGCAGGCGGCCGGCCGATGCAGAGCGCAATGGCGGCTGGAGAATGTGTAGAAAGCATCGCCTTTGTAGTTTGGCCTCCCTGGGAACCGAGGAATTTAGCGGAAATTTCAAAAGAAACAAACTAATTTCTGTTAAAAGAAAGTTATACAAAATTCTTGTGTTC…	AGTGTTACTACCACGAACTAAATCTTGAGAGGAAAGGATTCTGCAGGTGGTGGCGGCAGCTTTGATTGGTCCGCCCGTAAAGTTTTTCAGCGGGGTGGGGTACACGGGGGTTTAGATCTTTATCTTTCGGGGAAAATGAGGCTGTGACTGTGAAAGCTCAGCACAGCCACAGCAGAAGCGTTTCTGTGACCGAAAGGTGGAAAGATCGCAACCGTGGCCGTGCCAAAGTGTGGATGTGCAGGCGGCCGGCCGATGCAGAGCGCAATGGCGGCTGGAGAATGTGTAGAAAGCATCGCCTTTGTAGTTTGGCCTCCCTGGGAACCGAGGAATTTAGCGGAAATTTCAAAAGAAACAAACTAATTTCTGTTAAAAGAAAGTTATACAAAATTCTTGTGTTCT…
318	Chr01	23063948	24112619	TGTGTGTATATATATATATATATATATATATATA	T	33	AGGCCTATGGATGAAAATCCATTACTAATTTTAGGTTGGTTCGAATGATATCAACAACAAACGTTAAGTCTTTCTTGAAAGCGCAATTTTGGAGAACTATATACCTTTTCATCTTACTTATAAGAGTGTTAGCTGTCACTAGGGACCATGATATTTTTGTGTCCTCTTGTTTTTTTATGTGTAATGAAATGTCCATTTGCATCGTAAAAATGTGATACTCCATCTAGTTATAAATATTTAACATTTAAAATCAGATCTAATCTAACTTTTGGAAATATGAGCAATAATAATTTCTCAAATGCTTAATATACACACGTATGGTTGCCTTAAAAATACTTGTATTTCCATACGTATGCTTAAATACAGGAATCAGTTTCTCAAAAGTAAACTTGTCATACT…	GGCCTATGGATGAAAATCCATTACTAATTTTAGGTTGGTTCGAATGATATCAACAACAAACGTTAAGTCTTTCTTGAAAGCGCAATTATGGAGAACTATATACCTTTTCATCTTACTTATAAGAGTGTTAGCTGTCACTAGGGACCATGATATTTTTGTGTCCTCTTGTTTTTTTTATGTGTAATGAAATGTCCATTTGCATCGTAAAAATGTGATACTCCATCTAGTTATAAATATTTAACATTTAAAATCAGATCTAATCTAACTTTTGGAAATATGAGCAATAATAATTTCTCAAATGCTTAATATACACACGTATGGTTGCCTTAAAAATACTTGTATTTCCATACGTATGCTTAAATACAGGAATCAGTTTCTCAAAAGTAAACTTGTCATACT…
319	Chr01	23064458	24113077	A	ATCCCCACAAAAAAAAAATATATGCATATGA	30	ATATATATATATATATATATATACATATATATATATATACATATATATATATATACATATATATATATGCTTTGTAGTTTTCTTGTTTTTTAATTAAGCCGCGTAGTTTTGTAATTGATAAACGTTCTTCCTGCAACCTATATTATAATAATTGGTTATATATATTTTTTAAGTAAAGCATGGATGAATTTCATTATCTAACACAAATTTGCTTGGTTAATTGGGGGAACTCACCTTAATTACATGTCACTGTGACAAAGCATGAGTCATCTAAATCCTAAATGAACCCTGAACAAGTGGACAGCGCGCTAAACCTCCTACTAGAAATTAAAGCTCCTCCTTTTTTTTTTCTTTAAGCACAACGCTCCGCATATCTTTTCCTTGATAAATTCTAAATAA…	TGTTCCTGATGCCATGCATACACGTATTTTTAGTGTGTGTGTCTATATATATATATATATATATATTTGCTTTGTAGTTTTCTTGTTTTTTAATTAAGCCGCGTAGTTTTGTAATTGATAAACGTTCTTCCTGCAACCTATATTATAATAATTGGTTATATATATTTTTTAAGTAAAGCATGGATGAATTTCATTATCTAACACAAATTTGCTTGGTTAATTGGGGGAACTCACCTTAATTACATGTCACTGTGACAAAGCATGAGTCATCTAAATCCTAAATGAACCCTGAACAAGTGGACAGCGCGCTAAACCTCCTACTAGAAATTAAAGCTCCTCCTTTTTTTTTTCTTTAAGCACAACGCTCCGCATATCTTTTCCTTGATAAATTCTAAATAA…
320	Chr01	23064946	24113593	TGGTAACTTCAACCGGGACTAAAGTTCATTTTTAGTCCCGGTT	T	42	ATATGCATATGATGACCTTATATGCTTCGACTTTACGTGACATGTGTATGAAATATATATATAGTTCTGGCCGGGCTCTACTTATATATCTATGTGGGATATATATCAGTATACATAAATGTAGATATAGACTAGACAAATAAAGCCCTAAAGCAACTTCCGTCCATTCTGTTTTAATTTCTTTTCTTTTTTTAACCATTGTTACCGCTTTTTTTTTTTCACTTCTCTTTCCGGGGACAAAAAACAATGTGATGTAGTATGCCGTTCGTGATCGACTCGCGCTCTAGCCTTTCCTTCACATGCTATCTCGTGTTGGTCTACTCCGTTCGTATTCACTGGTAGAGAAAACATTTTTGGTCGGTCGACCCAAATCCACAATAGTCCCGGTTCCATTAAAAA…	ATATATGCATATGATGACCTTATATGCTTCGACTTTACGTGACATGTGTATGAAATATATATATAGTTCTGGCCGGGCTCTACTTATATATCTATGTGGGATATATATCAGTATACATAAATGTAGATATAGACTAGACAAATAAAGCCCTGAAGCAACTTCCGTCCATTCTGTTTTAATTTCTTTTCTTTTTTTAACCATTGTTACCGTTTTTTTTTTCACTTCTCTTTCCGGGGACAAAAAACAATGTGATGTAGTATGCCGTTCGTGATCAACTCGCGCTCTAGCCTTTCCTTCACATGCTATCTCGTGTTGGTCTACTCCGTTCGTATTCACTGGTAGAGAAAATATCTTTGGTCGGTCGACTCAAATCTACAATAGTCCCGGTTCCATTAAAAA…
321	Chr01	23065743	24114339	T	TTGGTAACACCAACCGGGACTAAAGATCGATTT	32	TTCACCCACAGTGCAGAAGCGTGCCGGCGCCGCGGCGGCGGCGGGCACGCGGGGGACGGCGCGGAGGTGGCCTGCGCGGCGGTGGCGGCGGGCGGCCGGCGTGGGGGGGCAGCGCGGAGGCGGCCTGCGCGGCGGCAGCGCGGGGGGCCGCTCGGCGGCGACCGGCGCGGCGGCGCGGGGGGCCGCGCGGCGGCGGGTGGCGGCGGTGCGGCGCCGGCCGACTGGCGCGGAGGGGAGGCGGCAGTGGCCGCCGGCCGGATTTTTTTTTTTAGATGTGAATCTGTGATGCATTTTTGTGTGAGATGTGAATCTGTGATGAATTTTTTAGAACCCTGTGATATAATTTTTTTTAAGAGTTTGTGATGTATTTGGAGATGATTTGTTTGAGGATTTGAGGAT…	CTTCACCTACAGTGCAGAAGCGTGCCGGCGCCGCGGCGGCGGCGGGTGGCCGGCGCGGAGGCGGCGACGCGGGGGGACGGCGCGGAGGTGGCCTGCGCGGCGGCGGCAGCGCGGGGGCCGCGCGGAGGCGGCCTGCGCGGGGGGCCGCTCGGCGGCGACCGGCGCGGCGGCGCGGGGGGCCGCGGCGGCGGGCGGCGGCGGTGCGGCGCCGGCCCGCCGGCGCGGAGGGGAGGCGGCAGTGGCCGCTGGCCAGATTTTTTTTTTAGATGTGAATCTGTGATGCATTTTTGTGTGAGATGTGAATCTGTGATGAATTTTTTAGAACCCTGTGATATAATTTTTTTTAAGAGTTTGTGATGTATTTGGAGATGATTTGTTTGAGAATTTGAGGATTTGGAG…
322	Chr01	23327529	24376849	AAAAAATTTACCAAACAATAAAGATATGATTGATGATT	A	37	CATCGCATCCAATCGCGCCACAGTTCCCGGTTGCATCCGCGCCCGCCGCATCCAGCCGCGTCGCCATGCCCGGCGCCCCGGCCGTGCTCGCCCTCCGGCCGCTTGCAGCGCCGGCCACTCGCGACGACGGCCCCCCACCATGGCCACCCGCCCGCTCCGTCGCTCGCACAGCACCAGCATCCGTAGCGTCGACTGTCCGCCTCGCCCCTGGTGTCCACTGGCCGCCGTGACTCCCCACCTCGCCCCCCCTCCCCCCTACGCGAACAGAGCGGGCAGGTGCAGCTGGAGCGGCGTCACGTGACGACGAGGCATGCGCCGGTGCCGCGTGCGTGAGGGCAATCCGGTCTTTTTTGATTGTTTCTCTCTCTATGTTGTTCGGAAATAATAAAATAATATCAT…	CATCGCATCCAATCGCGCCACAGTTCCCGGTTGCATCCGCGCCCGCCGCATCCAGCCGCGTCGCCATGCCCGGCGCCCCGGCCGTGCTCGCCCTCCGGCCGCTTGCAGCGCCGGCCACTCGCGACGACGGCCCCCCACCATGGCCACCCGCCCGCTCCGTCGCTCGCACAGCACCAGCATCCGTAGCGTCGACTGTCCGCCTCGCCCCTGGTGTCCACTGGCCGCCGTGACTCCCCACCTCGCCCCCCCTCCCCCCTACGCGAACAGAGCGGGCAGGTGCAGCTGGAGCGGCGTCACGTGACGACGAGGCATGCGCCGGTGCCGCGTGCGTGAGGGCAATCCGGTCTTTTTTGATTGTTTCTCTCTCTATGTTGTTCGGAAATAATAAAATAATATCAT…
323	Chr01	23479517	24528794	GTGCAACAAGAGAAACAAGAGGAAAAAAAGACACTG	G	35	CGCACCTCCGCCCGCACGACGAGCTACCCGCCGTTCGTCGCGGTGTGCGGGCGCCCGCGCGGCTATGGAAACCACCGGCTGCCGCGGGCCGGAGGCGGCCTCGCCCTCCGGGAACACGCGTCTCGCATGTGCGACGCCACGGAGAACGCGCGTCGATCATGTGGGCGGTTGCGCCGGGAGCGTCTGGTTACTGGCGGACGTGCCTCCGCGCGGACGACGCAGTAAACTCCGATCTGATCCGGTTAAACGTTCTAGTAGCAGCTACACGACGCATGGCGCTATGGCAGTCACCACCTGTGAGAGCCGGTGCCAGTCTGAGCATCACTTCACTCGTGGTACACGTATACTCGTTCACCGTGTGGCTGGTGATGAAATGAGCTCGCAGCTGCTCTGTACTAT…	CGCACCTCCGCCCGCACGACGAGCTACCCGCCGTTCGTCGCGGTGTGCGGGCGCCCGCGCGGCTATGGAAACCACCGGCTGCCGCGGGCCGGAGGCGGCCTCGCCCTCCGGGAACACGCGTCTCGCATGTGCGACGCCACGGAGAACGCGCGTCGATCATGTGGGCGGTTGCGCCGGGAGCGTCTGGTTACTGGCGGACGTGCCTCCGCGCGGACGACGCAGTAAACTCCGATCTGATCCGGTTAAACGTTCTAGTAGCAGCTACACGACGCATGGCGCTATGGCAGTCACCACCTGTGAGAGCCGGTGCCAGTCTGAGCATCACTTCACTCGTGGTACACGTATACTCGTTCACCGTGTGGCTGGTGATGAAATGAGCTCGCAGCTGCTCTGTACTAT…
324	Chr01	23479556	24528798	AATCATGAACGTGCTTAGGCTATAGTACGAGT	A	31	GCGGTGTGCGGGCGCCCGCGCGGCTATGGAAACCACCGGCTGCCGCGGGCCGGAGGCGGCCTCGCCCTCCGGGAACACGCGTCTCGCATGTGCGACGCCACGGAGAACGCGCGTCGATCATGTGGGCGGTTGCGCCGGGAGCGTCTGGTTACTGGCGGACGTGCCTCCGCGCGGACGACGCAGTAAACTCCGATCTGATCCGGTTAAACGTTCTAGTAGCAGCTACACGACGCATGGCGCTATGGCAGTCACCACCTGTGAGAGCCGGTGCCAGTCTGAGCATCACTTCACTCGTGGTACACGTATACTCGTTCACCGTGTGGCTGGTGATGAAATGAGCTCGCAGCTGCTCTGTACTATCCGGAATTAACCTGCATCTGCATCGCTCCTCTGCATGCC…	CCTCCGCCCGCACGACGAGCTACCCGCCGTTCGTCGCGGTGTGCGGGCGCCCGCGCGGCTATGGAAACCACCGGCTGCCGCGGGCCGGAGGCGGCCTCGCCCTCCGGGAACACGCGTCTCGCATGTGCGACGCCACGGAGAACGCGCGTCGATCATGTGGGCGGTTGCGCCGGGAGCGTCTGGTTACTGGCGGACGTGCCTCCGCGCGGACGACGCAGTAAACTCCGATCTGATCCGGTTAAACGTTCTAGTAGCAGCTACACGACGCATGGCGCTATGGCAGTCACCACCTGTGAGAGCCGGTGCCAGTCTGAGCATCACTTCACTCGTGGTACACGTATACTCGTTCACCGTGTGGCTGGTGATGAAATGAGCTCGCAGCTGCTCTGTACTATCCGG…
325	Chr01	23573919	24625620	TATATATATATATATATATATATATATATATATATATATATATATAT	T	46	TATTTACCTATGGGGGGTGTATTTTATATACGTAACAAATGCTTTATTTTCTGCCCGCAATAAATAATGGAATAACTCTATACTTCTCTAACATATTTTTAGCGTATATTGCCCTTTTATATTGTGTACTAAGTGATTATATATAATTAAGTCTTGTAAAATTTTACTATGCCCACGTAATATCATAGTACTGCACTTTACATGAAATGTATTTAATGTATGATATGATTTTAATTAAAGTTCAAATGCACAGATCATATAAAAATATTTTTTGGTAACATGAATTTTTTTAAAAAAATACAAACAAAAAGAATTGCACCGTAACATTTAGCACGAGCATATTACTAGTAAAGATAACGTATCAAAGTACCGGCAAAAACATCTTCAATTTTTATAATA…	TATTTACCTATGGGGGGTGTATTTTATATACGTAACAAATGCTTTATTTTCTGCCCGCAATAAATAATGGAATAACTCTATACTTCTCTAACATATTTTTAGCGTATATTGCCCTTTTATATTGTGTACTAAGTGATTATATATAATTAAGTCTTGTAAAATTTTACTATGCCCACGTAATATCATAGTACTGCACTTTACATGAAATGTATTTAATGTATGATATGATTTTAATTAAAGTTCAAATGCACAGATCATATAAAAATATTTTTTGGTAACATGAATTTTTTTAAAAAAATACAAACAAAAAGAATTGCACCGTAACATTTAGCACGAGCATATTACTAGTAAAGATAACGTATCAAAGTACCGGCAAAAACATCTTCAATTTTTATAATA…
326	Chr01	23580761	24632420	GAATATATATATATATATATATATATATATATAT	G	33	GATGGTGATGGACCCGTCGTCGCTTCCTCGGTCGCCCCGATTTCCTCCCCCGCGGCACCGCTGCCGGGTTCCGGTCCCCGGTGGCGACGCTCCCGGATTGGCTTATACATCCGGAGGCCAATCCTGCACGGGATGCCCTGTACCACCATCTCGTCCTCCGCTTCACCGTCTCGGCGACACGCTCGGTGCCACTAACTCCCTGTTTCCCTAAGTACTCAATTACTCATATCATTCTCATCATTAATGTCCCTTCTGCAACAAAATGGTAAGCTATGTTTTGGACACATTCCCATTCATTTCCCTAGTACAGCGGTGGTGGTTCTTTTGAGTTTGCATATGATGGAGGGGATAGGTTTGCGTTGCGTTCATCCTTATGTATCCAATATTAAGATAAGTGTA…	GATGGTGATGGACCCGTCGTCGCTTCCTCGGTCGCCCCGATTTCCTCCCCCGCGGCACCGCTGCCGGGTTCCGGTCCCCGGTGGCGACGCTCCCGGATTGGCTTATACATCCGGAGGCCAATCCTGCACGGGATGCCCTGTACCACCATCTCGTCCTCCGCTTCACCGTCTCGGCGACACGCTCGGTGCCACTAACTCCCTGTTTCCCTAAGTACTCAATTACTCATATCATTCTCATCATTAATGTCCCTTCTGCAACAAAATGGTAAGCTATGTTTTGGACACATTCCCATTCATTTCCCTAGTACAGCGGTGGTGGTTCTTTTGAGTTTGCATATGATGGAGGGGATAGGTTTGCGTTGCGTTCATCCTTATGTATCCAATATTAAGATAAGTGTA…
327	Chr01	24279352	25407196	A	ATATATATATATATATATATATATATATATA	30	TTCAACACTCACGCACAAAGCACATTGATATTCGTTTTCACTTTTTGAGGGATCATGTTGAGAAGGGAGATGTTGAATTGCAGTTTTTGGACACCAAGTTGCAAATTGCTGATATTTTCACTAAACCTTTGGATTCTAACCGATTTGCTTTTCTTCGTGGTGAATTGGGAATAATTCATCCTTTTGGCATGGTTTGAGGGGGAGTTTGTACCTCATGCTTTTATCAAGCAATAATATGACAATGAGAAAAATTGATAAAAGATAGCTTTGTTTATACATATGGTATTTTCTTGTGCATGCTAGCAATACTTTGAAAGTTTATTTGTCTCTAGCACAGCTTGTATTTATTCTAGTCTTTTCATGAGATTTAGATTTTGCTTTTAAGGGAGATGATGCATG…	TTCAACACTCACGCACAAAGCACATTGATATTCGTTTTCACTTTTTGAGGGATCATGTTGAGAAGGGAGATGTTGAATTGCAGTTTTTGGACACCAAGTTGCAAATTGCTGATATTTTCACTAAACCTTTGGATTCTAACCGATTTGCTTTTCTTCGTGGTGAATTGGGAATAATTCATCCTTTTGGCATGGTTTGAGGGGGAGTTTGTACCTCATGCTTTTATCAAGCAATAATATGACAATGAGAAAAATTGATAAAAGATAGCTTTGTTTATACATATGGTATTTTCTTGTGCATGCTAGCAATACTTTGAAAGTTTATTTGTCTCTAGCACAGCTTGTATTTATTCTAGTCTTTTCATGAGATTTAGATTTTGCTTTTAAGGGAGATGATGCATG…
328	Chr01	24588233	25716139	ATATATATATATATATATATATATATATATATATA	A	34	TATTTCCAAAAGAGAACGAACTTTAATAGTCGACTAAAACACGGATGACGTACGAAAATACCGACACAAACATCTTCAATTTTTATAACAATAGAGATATGGACTCTAGATTTTTTTCAATATTCTTTATTTCGAAAGATTTCTAGCTTGCTTTGCTAATTTGTGTTTTGCTAGGAGTATGTACTTATCGACACGGCATGTTCTGGTGCAATTCGAAAACGGTGCAGATTTTGGTTTCAATTGGTTTATCTCTCACGGTTTCCAAAGACAATTGTGTCTTGTCCCTTTTTTTCTGTATATACAATGGATACAATACGAAAATGGTATTCAAAAATACATTGTCCGTTTCTGATGTCCTAATATCTAGTTTTTTTTTCTTTTTTCTATCCGCAAGTATAT…	TATTTCCAAAAGAGAACGAACTTTAATAGTCGACTAAAACACGGATGACGTACGAAAATACCGACACAAACATCTTCAATTTTTATAACAATAGAGATATGGACTCTAGATTTTTTTCAATATTCTTTATTTCGAAAGATTTCTAGCTTGCTTTGCTAATTTGTGTTTTGCTAGGAGTATGTACTTATCGACACGGCATGTTCTGGTGCAATTCGAAAACGGTGCAGATTTTGGTTTCAATTGGTTTATCTCTCACGGTTTCCAAAGACAATTGTGTCTTGTCCCTTTTTTTCTGTATATACAATGGATACAATACGAAAATGGTATTCAAAAATACATTGTCCGTTTCTGATGTCCTAATATCTAGTTTTTTTTTCTTTTTTCTATCCGCAAGTATAT…
329	Chr01	24659509	25787452	ATATATATATATATATATGTGTGTGTGTGTGTGTGTGTGTG	A	40	CTGGAGTTGGCACGCCGGCTCCGGCTAGGGACGAGAGCCAGGAAGCTCTCATCATTCCGACGGGACGGGGCGAGGCGTGTGACAGGCCGCCTGTTGCCACCTAACCCGCGATCTGGCCGGTCTGTGACCGGTCACACACCGCGACCGGTCACGGACCAGATAAGCATGCGCTGCGCCGCATTAAATGCGGCGTGGTGCACTTCGTCCAACCTGCTATAAATGCGGTTAGGTGAGCCCCGCTGTGCTCACCTAACCCACACACGTGGCGCCAAAACCACAGGGGGTCGGGGCGCCCCAGCCCTCGGGGCCGAAACGGGAGCGGCCCGACCCCTCGGGGAGACAGAGGGAGGGGTGGCCACGTCACCTTCGGGCCCGACCCCCCCGAGGGGGTCAGGCCAC…	CCTGGAGTTGGCACGCCGGCTCCGGCTAGGGACGAGAGCCAGGAAGCTCTCATCATTCCGACGGGACGGGGCGAGGCGTGTGACAGGCCGCCTGTTGCCACCTAACCCGCGATCTGGCCGGTCTGTGACCGGTCACACACCGCGACCGGTCACGGACCAGATAAGCATGCGCTGCGCCGCATTAAATGCGGCGTGGTGCACTTCGTCCAACCTGCTATAAATGCGGTTAGGTGAGCCCCGCTGTGCTCACCTAACCCACACACGTGGCGCCAAAACCACAGGGGGTCGGGGCGCCCCAGCCCTCGGGGCCGAAACGGGAGCGGCCCGACCCCTCGGGGAGACAGAGGGAGGGGTGGCCACGTCACCTTCGGGCCCGACCCCCCCGAGGGGGTCAGGCCA…
330	Chr01	25511561	26650283	CCAACCGCAAACACACGCTACAGAGAGGGGAGC	C	32	TTTGTTGTCTGTGACAGTCTAAAGTTTTGCTGGATGAACTAATATGTGTCCTGCCACCAATCTGCACGTTTTTTTTTCTGTAATGTTGATTACTTCTCTTTCTATATAGCGCAAGTGCTGAGCAGCAAGCCGTCGACTGTAAAATCTCACCAGTTTATCTAATATATGGACAGCGAGCATTCTAGACCCCCCTATCGCTTGTACTAGTACTAGCAGCGAGCATTTGGTTGGGCCAAATTTAGTTGAGCTTACGTGATTGGGTTGCGCAGGGTTCGGTACAGTGTCACCGGTGCACCGCGCAGGCGAGCGGAGTGCGGAAACTCTCGGCGGTCAGGTGCTGGGTGTTGCTAACTTGTCGTGTTGGCCACTTATTTTGCCGGAAAGACCGAAGGAGGTCAT…	TTTGTTGTCTGTGACAGTCTAAAGTTTTGCTGGATGAACTAATATGTGTCCTGCCACCAATCTGCACGTTTTTTTTTCTGTAATGTTGATTACTTCTCTTTCTATATAGCGCAAGTGCTGAGCAGCAAGCCGTCGACTGTAAAATCTCACCAGTTTATCTAATATATGGACAGCGAGCATTCTAGACCCCCCTATCGCTTGTACTAGTACTAGCAGCGAGCATTTGGTTGGGCCAAATTTAGTTGAGCTTACGTGATTGGGTTGCGCAGGGTTCGGTACAGTGTCACCGGTGCACCGCGCAGGCGAGCGGAGTGCGGAAACTCTCGGCGGTCAGGTGCTGGGTGTTGCTAACTTGTCGTGTTGGCCACTTATTTTGCCGGAAAGACCGAAGGAGGTCAT…
331	Chr01	26261349	27414829	ATATATATATATATATATATATATATATATATA	A	32	AGAGTAGAGATTATGTGCTTCGTAGGACTTCTTGAGATGTTGGGGGTGTAACCCCTTATTCAGGCATTAATAGTAATCTCTTTACCCTAAAAAATAACACATTATGCGAAAGATGGTACTCTACATTGAGGTGATCTCGATGAATTTCGAACTTAAAATATATTTGTCTTGTAAATAGCTAACTGATTTGGATCTTCCACACGCTAAATGTGTTTGCTATGTAATAATATGAAGTTTCAACACAACGTCAAATGTTTATCCAAGCATCCCATATTTTCTGCATCTGTCTTTCATCATATGCTAGCTGGCTCGGTTAGCTGCTAAATTTTGTGTTTTTGAAACTTAGGGGTGTGTTTGAACTGGACATTCGGCTGGTCTAATTCGTTTCACGCAAAATGA…	AGAGTAGAGATTATGTGCTTCGTAGGACTTCTTGAGATGTTGGGGGTGTAACCCCTTATTCAGGCATTAATAGTAATCTCTTTACCCTAAAAAATAACACATTATGCGAAAGATGGTACTCTACATTGAGGTGATCTCGATGAATTTCGAACTTAAAATATATTTGTCTTGTAAATAGCTAACTGATTTGGATCTTCCACACGCTAAATGTGTTTGCTATGTAATAATATGAAGTTTCAACACAACGTCAAATGTTTATCCAAGCATCCCATATTTTCTGCATCTGTCTTTCATCATATGCTAGCTGGCTCGGTTAGCTGCTAAATTTTGTGTTTTTGAAACTTAGGGGTGTGTTTGAACTGGACATTCGGCTGGTCTAATTCGTTTCACGCAAAATGA…
332	Chr01	26263507	27416955	ACGGCTATTTTGGTTTCAATCCAAACACAATTTTTCCTTTGCCAAAATTAA	A	50	GAGATCGAACTACAACTACGGTAGAGAAAATTCTAAAAAAATACGGTAGAGAAGATGGGCCTTTTTCTTGTCCTTTTTCTTATTGCGCTGCTCAGTTGCTGTGTTTGGCTCGTGAGCAGCTAGCTCGTTATAAATAACGAGCTAAAACGCTGAGCCGAGTGAGCTTTTCGTCCAGCCCTACACATGCATGAAAAATTTGCCATATTTTTTATTGCTTTATTTATTTATCTACAACTTATATTCTTTTTCTTAGCAAACATCCCTGTTCAGTTTTGACAGGAGCAATTTCTCAACCACTTGAAAAGAACCACAATCACTATGGGTTGGTTTGGTTTGAGGCCTATATTGGCCTTACCAATATTTAGCAATTTCAATAGTGTTTATTGTCTATTTGGTTTG…	GAGATCGAACTACAACTACGGTAGAGAAAATTCTAAAAAAATACGGTAGAGAAGATGGGCCTTTTTCTTGTCCTTTTTCTTATTGCGCTGCTCAGTTGCTGTGTTTGGCTCGTGAGCAGCTAGCTCGTTATAAATAACGAGCTAAAACGCTGAGCCGAGTGAGCTTTTCGTCCAGCCCTACACATGCATGAAAAATTTGCCATATTTTTTATTGCTTTATTTATTTATCTACAACTTATATTCTTTTTCTTAGCAAACATCCCTGTTCAGTTTTGACAGGAGCAATTTCTCAACCACTTGAAAAGAACCACAATCACTATGGGTTGGTTTGGTTTGAGGCCTATATTGGCCTTACCAATATTTAGCAATTTCAATAGTGTTTATTGTCTATTTGGTTTG…
333	Chr01	26299958	27455216	TATATATATATATATATATATATATATATATATATATATATATATATA	T	47	CTCATTATTCATTTCAAATAGAGTAAACTGAATATCTTGTTTTTTCAGGTTTTCAAATTTAACAGGGACTGATTACAGTGAAGGAGCCATTGAACTTGCAAAAAACCTTGCTGCACGTGATGGGTTTACTTCTATAAATTTCTTGGTTAGTGTACTATATTCAAGTCGAAGTTTCTTCTTCCTTGAGTGCTGCAAATACTTTCTACTTGAAGAGAATCTGCCCGGCTACATTTTTCAATAAATATCATGTAAAGTTCTAAATAATGTTGAGTTACTATTGTCAGATGCACTGCAGCTCAAATAGCAAGAGTCTATGGGAACAATTGCTACTCTACTTGTTTTATCCTAGAAGCATATTTGCATCAGTGTAGAATGAAAAACTAAAGGTTTGATAGGAAA…	CCTCATTATTCATTTCAAATAGAGTAAACTGAATATCTTGTTTTTTCAGGTTTTCAAATTTAACAGGGACTGATTACAGTGAAGGAGCCATTGAACTTGCAAAAAACCTTGCTGCGCGTGATGGGTTTAGTTCTATAAATTTCTTGGTTAGTGTACTATATTCAAATCGAAGTTTCTTCTTCCTTGAGTGCTGCAAATACTTTCTACTTGAAGAGAATCTGCCCGGCTACATTTTTCAATAAATATCATGTAAAGTTCTAAATAATGTTGAGTTACTATTGTCAGATGCACTGCAGCTCAAATAGCAAGAGTCTATGGGAACAATAGCTACTCTACTTGTTTTATCCTAGGAGCATATTTGCATCAGTGTAAAATGAAAACTAAAGGTTTGATAGGAAA…
334	Chr01	26360839	27505296	G	GACCTTTCCCTTTGATCCCACACGCATGAAA	30	CCTGGACCGGTGGCGCCGCGAGCGAGACGGGGAACTGGAGCGGGTCCGATGCCGCCGCGACGGGGACGGGGACCGAGAGTGACGGCCTGTGCGGGACGGCTCGTGTGGCGGCGGCGGCGGCGGCGGCGGCTGCTTGGTGGGTTGCGCGGGGGCGGGGGTGGCGCCGGCGCGGACGAAGCCGGAGAGGAAGGAGGAGGAGGTGGAGGGGGGTTTGGAGGGGAAGGAGGTGGATTGGGGATCGGAGGAGGAGAAGCCGAGGCCCTGCTTGAAGCGGCGGGCGCCCTCGCCCTTGCGGCTGAGCTCGTCGTAGTACGCCGCCGCCTTCTCTTCCTCCATGGCTTCCGGCGAGTCTGGGGCTGTGTGGGCTTAGGTCGTAGGCTTGCAACGTCGCGATACCTT…	CTCCCTCGACCTGGACCGGTGGCGCCGCGAGCGAGACGGGGACCTGGAGCGGGTCCGATGCCGCCGCGACGGGGACGGGGACCGAGAGTGACGGCCTGTGCGGGACGGCTCGTGTGGCGGCGGCGGCGGCTGCTTGGTGGGTTGCGCGGGGGCGGGGGTGGCGCCGGCGCGGACGAAGCCGGAGAGGAAGGAGGAGGAGGTGGAGGGGGGTTTGGAGGGGAAGGAGGTGGATTGGGGATCGGAGGAGGAGAAGCCGAGGCCCTGCTTGAAGCGGCGGGCGCCCTCGCCCTTGCGGCTGAGCTCGTCGTAGTACGCCGCCGCCTTCTCTTCCTCCATGGCTTCCGGCGAGTCTGGGGCTGTGTGGGCTTAGGTCGTAGGCTTGCAACGTCGCGATACCTT…
335	Chr01	26566263	27702636	GGGCTCGATGGCCGACGCCGGCAGCAGCGGCG	G	31	ACAGTTTTGATCGATGAATCTCATGTACTGACGCACGTGATCCAATTTTTGCTCTAATCTCTCTCTGCAAAAGACACATGCGTGAACTTCAAACTACAGCATCCTCATCGACGAAACGAAATACAAACCACTCGCAAGGCAGTGGCCGGAAAATATCTGAAAGATACCGTTTGTCGTACTCCTTTTCTTCTCTATTCTTCTCAGTACTTCTAAACTTGTACTCTAATAGTATTCAACAATCCACGTCAAGGTTCGTTTGGTAAAACTCTAATTCCTAAAATCAGGAGTTAGATTTAAAGGAGAGTTATGAAGAAGCCTATGAGATTTTTTACTGTCGAGGTTGTACAATATCAAATCCTGACCGTTAATCTAGTATCATCCAACGGTTAGAAATCATCC…	AGTTTTGATCGATGAATCTCATGTACTGACGCACGTGATCCAATTTTTGCTCTAATCTATCTCTGCAAAAGACACATGCGTGAACTTCAAACTACAGCATCCTCATCGACGAAACGAAATACAAACCACTCGCAAGGCAGTGGCCGGAAAATATCTGAAAGATACCGTTTGTCGTACTCCTTTTCTTCTCTATTCTTCTCAGTACTTCTAAACTTGTACTCTAATAGTATTCAACAATCCACGTCAAGGTTCGTTTGGTAAAACTCTAATTCCTAAAATCAGGAGTTAGATTTAAAGGAGAGTTATGAAGAAGCCTATGAGGTTTTTTACTGTCGAGGTTGTACAATATCAAATCCTGACCGTTAATCTAGCATCATCCAACGGTTAGAAATCATCCGT…
336	Chr01	26582198	27718529	C	CCACCGGTCTGGTCCGGTCCGTGGGGGCTCTGGTTCTGGTTTTTTCCGGT	49	AAGACTTTGTAGGAAAAATTTCTATAGAAATAAAATCCTCTAAAATTCTTATGAATTTCCTTTGAATCAAAGGGGGCCTTAGTGGTCGGATCACTTGTTTGCCCGGTCGAACCGTGGTTTGATTGGTAATATAGAAAGTACTATGTTTTAGGCCGGGTTTAGTTCCTAACTTTTTCATCACATCAAAACTTTCCTACACATATAAATTTCTAGCCTTTTTTCTTCAAACATCCAACTTTTTTTCTTCAAACTTCTAATTTTAATCAAACTTTCAATTTTAGTGTGGAACTAAACACACCCTTACTAATGGCACAAGCTGTACAACGGTAGCTTGGCTAGCGCACGGTGCTCTCAAACCCACGACCAGAGGTCGAATCCCCATCTCCGGTTTATAAAAAA…	AAGACTTTGTAGAAAAAATTTCTATAGAAATAAAATCCTCTAAAATTCTTATGAATTTCCTTTGAATCAAAGGGGGCCTTAGTGGTCGGATCACTGGTTTGCCCGGTCGAACCGTGGTTTGATTGGTAATATAGAAAGTACTATGTTTTAGGCCGGGTTTAGTTCCTAACTTTTTCATCACATCAAAACTTTCCTACACATATAAATTTCTAGCCTTTTTTCTTCAAACATCCAACTTTTTTTCTTCAAACTTCTAATTTTAATCAAACTTTCAATTTTAGCGTGTAACTAAACACACCCTTACTAATGGCACAAGCTGTACAACGGTGGCTTGGCTAGCGCACGGTGCTCTCAAACCCACGACCAGAGGTCGAATCCCCATCTCCGGTTTATAAAAAA…
337	Chr01	26595929	27758237	T	TCGGCGGCGGCGGGAGATGAGGAGGAGGCGGCGC	33	TGTGTGATAACCTTAATCTCATATTAATTTTTAGATGTTTTGTCAATGGGATTGACTCTGATAAATCTATGACCGACAATTGCCACTATCTTAGTTTGTTATGAAGTATTTTGATGGATATAAGTTTATATAAAATTGTTCCTATATATAGGGTAGTACATCACTACATTGTACTAGAGCCTTTGCTTCATACTGTAACATTTGTTTTTGGAAAAAGTACGAATTACTCCCCCGAACTTTCGCGGTCGACCGAATTACCTCCCTGAACCACAAAACCGGACATTCTTCACCCCCCAACTATACAAACCGAACGAATTACCCCCCTCGACCCAATTTGTGGTGGTTTTGGTCTACGTGGCGTACGCGTGGCAGCCCAGTCAGCATTATATTTATAAAAAA…	TGATAACCTTAATCTCATATTAATTTTTAGATGTTTTGTCAATGGGATTGACTCTGATAAATCTATGACCGACAATTGCCACTATCTTAGTTTGTTATGAAGTATTTTGATGGATATAAGTTTATATAAAATTGTTCCTATATATAGGGTAGTACATCACTACATTGTACTAGAGCCTTTGCTTCATACTGTAACATTTGTTTTTGGAAAAAGTACGAATTACTCCGCCGAACTTTCGCGGTCGACCGAATTACCTCCCTGAACCACAAAACCGGACATTCTTCACCCCCCAACTATGCAAACCGGACGAATTACCCCCCTCGACCCAATTTGTGGTGGTTTTGGTCTACGTGGCGTACGCGTGGCAGCCCAGTCAGCATTATATTTATAAAAAAATAT…
338	Chr01	26656104	27814738	GCAGACGAATCTTTTGAGCCTAATTAGTCTGTCAT	G	34	AAAAGCTGGAAAAATAAACTTCGATGTAAAACCCCAAAATCAACTCCAAATATAAAGTTAAAAATTCAAATTTTGGCTGATACGTATAAACATAAGAAAAAAGAAAAGGATGAGGGACAAACTCTTCCATGCTAGTAGTAACTGTTCGTGCTGTTGTCAAACAGTAGTCTCGCGCTACTGTTTGTATTCTTTTCGAAAAAAAATGAACTAGCTATACTGCTTTTTTATATGTGCTAATGGAATCCTAGCTACTCCGTATTTGAATTGACAAAATTAAAGCAGCATGTCATGCATTCTGCAGTTCTCTGCAGAGAGAAATTGGATCTGCGCACAGCAGGTCGGTTTACTTCGCGAAAAGAAAATTTTTAGTTATCACATCGAATGATTAACCGTATGTGG…	AAAGTAAAAGCTGAAAAAATAAACTTCGATGTAAAACCCCAAAATCAACTCCAAATATAAAGTTAAAAATTCAAATTTTGGCTGATACGTATAAACATAAGAAGAGGATGAGGGACAAACTCTTCCATGCTAGTAGTAACTGTTCGTGCTGTTGTCAAACAGTAGTCTCGCGCTACTGTTTGTATTCTTTTCGAAAAAAAAATGAACTAGCTATACTGCTTTTTTATATGTGCTAATGGAATCCTAGCTACTCCGTATTTGAATTGACAAAATTAAAGCAGCATGTCATGCATTCTGCAGTTCTCTGCAGAGAGAAATTGGATCTGCGCACAGCAGGTCGGTTTACTTCGCGAAAAGAAAATTTTTAGTTATCACATCGAATGTTTAACCGTATGTGGG…
339	Chr01	26689691	27831317	CGAGGTGGGGGAGGGGGAAGAGGAAAGGCGGCGGC	C	34	CCCATCACCAGCCGCGCCGCCGGTCGCCGCCGTCCGCGAGCCTCGCGCCGCCGTCGCCGTCGTGCAGCCGCCGTCGCTCGGCCCGCTGCCACCAGGGCCGGTGGCGCTGCAGCCGTCGCTCGCCCCCAGCGGCGCGAGCACCGCCGCCCGCGCGCATCTCGCCGTCGCGGCGGCTGCCGTGCGAGTCGTCGCCGTGACGTCGCCGCCGCCTCTACTGCCGACGCCGCGCCATCGCCGCCGCCCTTGACGCGTCGCCGCGCCGCGGCCTCCTCCGCCACTAGCGCCCACACCAGCCGGATCCGGCCAGGGGATGGCCAGATCCGGCGAAGGTGATGCCGGATCCGCCGTCTCCTCGCCGGGATCGGCCGCCGCCGTCGCTCCCCAACCGCCGCCGTTCGC…	CCCATCACCAGCCGCGCCGCCGGTCGCCGCCGTCCGCGAGCCTCGCGCCGCCGTCGCCGTCGTGCAGCCGCCGTCGCTCGGCCCGCTGCCACCAGGGCCGGTGGCGCTGCAGCCGTCGCTCGCCCCCAGCGGCGCGAGCACCGCCGCCCGCGCGCATCTCGCCGTCGCGGCGGCTGCCGTGCGAGTCGTCGCCGTGACGTCGCCGCCGCCTCTGCTGCCGACGCCGCGCCATCGCCGCCGCCCTTGACGCGTCGCCGCGCCGCGGCCTCCTCCGCCACTAGCGCCCACACCAGCCGGATTCGGCCAGGGGATGGCCAGATCCGGCGAAGGTGATGCCGGATCCGCCGTCTCCTCGCCGGGATCGGCCGCCGCCGTCGCTCCCCAACCGCCGCCGTTCGC…
340	Chr01	26805685	27927822	C	CCACGGCCTCAGCCGCCGTCCGCGCCATCGCCAGC	34	ACTTTTTTACACCTATTTAACGGTCAACTAGTGGTCAATTGATGGCAAGGGTATGGAAGCGATCAAAATCTAAAGTTAGGGGGTATACAAGGAAGCGAAGAAAATTTAGCGACATAGAAGGGATCGACTAAAGTTTTAGGGGCATAGAGGGAATTTTCTCAAGATTGTATGGAAAACCACTTATCACCTATACTTCAGATTTTGTTAGGTGTAAGAGAATCTCCAACAGCCTCTCCAAATGACTCTCCAAGCCAAATTTTAGCCATTCCAGTGAAAAAAACACCCTCCAACAGCCTCTCCAACCGGATGGCTAAGCCATCTGGCTGGCCAAAACCCTCCCTCCACTAGCCAAATTTGGCCAGCCAAAATGACTAGCCAACTATGGGCCCTACGCACATT…	ACTTTTTTACACCTATTTAACGGTCAACTAGTGGTCAATTGATGGCAAGGGTATGGAAGCGATCAAAATCTAAAGTTAGGGGGTATACAAGGAAGCGAAGAAAATTTAGCGACATAGAAGGGATCGACTAAAGTTTTAGGGGCATAGAGGGAATTTTCTCAAGATTGTATGGAAAACCACTTATCACCTATACTTCAGATTTTGTTAGGTGTAAGAGAATCTCCAACAGCCTCTCCAAATGACTCTCCAAGCCAAATTTTAGCCATTCCAGTGAAAAAAACACCCTCCAACAGCCTCTCCAACCGGATGGCTAAGCCATCTGGCTGGCCAAAACCCTCCCTCCACTAGCCAAATTTGGCCAGCCAAAATGACTAGCCAACTATGGGCCCTACGCACATT…
341	Chr01	27219380	28317002	T	TATATATATATATATATATATATATATATATATA	33	TGTTAATCAATTACTAATGATTAAGATTAACAAAAAGGTGGATATTCTCATCCGACCAATTTGGTCAGATACGCTCATCCAACATATGTGTGAGTTATTTCCTCTTTGGACCACCCTATCCACCTTTATCCACCAACCAAACATACCAAAAAACTGGATAGGAGAGATCATCTCCTATCCAGGGATATCCCTTTAACCAAATATAAACTAAGATGCTCATATGATTAGTGTATACACTAGAAAAAGCGCGCGGCTTTGCCACGTGTGGTACAGTGAGCCTGGCTCATTAGGCCTAGTGAATAGGTAACAAATTAATACACATATATAGAAGAGCCAGATTAATAGTAGAGATAACTAAACTTATATTAGAGCTTATAAGTTGGCTATAAGATTGTCTCT…	TGTTAATCAATTACTAATGATTAAGATTAACAAAAAGGTGGATATTCTCATCCGACCAATTTGGTCAGATACGCTCATCCAACATATGTGTGAGTTATTTCCTCTTTGGACCACCCTATCCACCTTTATCCACCAACCAAACATACCAAAAAACTGGATAGGAGAGATCATCTCCTATCCAGGGATATCCCTTTAACCAAATATAAACTAAGATGCTCATATGATTAGTGTATACACTAGAAAAAGCGCGCGGCTTTGCCACGTGTGGTACAGTGAGCCTGGCTCATTAGGCCTAGTGAATAGGTAACAAATTAATACACATATATAGAAGAGCCAGATTAATAGTAGAGATAACTAAACTTATATTAGAGCTTATAAGTTGGCTATAAGATTGTCTCT…
342	Chr01	28112500	29029805	GAGGTACCATGAGGTATCAAAATTTACACTAA	G	31	CTAGGAGAAGGAAACACAGCTTTTGCTTCTCTGTGACGGCCGGAGCAGTTGCTGGATGGCATATTGACAACATTGGGCATCTTCTGCTGCCTAGCTAGAGTTGTTCAAGCGATCGTCAGACTTTGCCTCTCGGCCAGTTTGAGAGTTTTACCTTATGGGACAGTGCTGAACTGCTGACGTGATTTATATGTGTTGAGAATAACATTTTATTATTCTAAAAACAGCAATAATGCAAATCATTGTTGGGGTTGACACTGCCATTACTAGATATGCCTCTTTCGCAACTAAACAGTGACAGATGTCTTTGCATGCACTAGCTGTACTAATTTATTTTTTTCAGGGCAATTGAAATTAATCGCTTCCGTTTAGGCGTGCTGCTGTTCGTCGCTGCTGTCTCGA…	CCTAGGAGGAGGAAACACAGCTTTTGCTTCTCTGTGACGGCCGGAGCAGTTGCTGGATGGCATATTGGCAACATTGGGCATCTTCTGCTGCCTAGCTAGAGTTGTTCAAGCGATCGTCAGACTTTGCCTCTCGGCCAGTTTGAGAGTTTGACCTTATGGGACAGTGCTGAACTGCTGACGTGATTTATATGTGTTGAGAATAACATTTTATTGTTCTAAAAACAGCAATAATGCAAATCATTGTTGGGGTTGACACTGCCATTACTAGATATGCCTCTTTCGCAACTAAACAGTGACAGATGTCTTTGCATGCACTAGCTTTACTAATTTATTTTTTCAGGGCAATTGAACTTAATCGCTTCCGTTTAGGCGTGCTGCTGTTCGTCGCTGCTGTCTCGA…
343	Chr01	28121659	29038989	A	AGATAGATAGATAGATAGATAGATAGATAGATAG	33	TCTGAGTTGTTAGGTATACCTTATACTCAGAAGGATAAATACGTTTTTTTCCTTGAGAATTAATGGTCAACACACGGTCAACTGACGGGAGTGGCATAAGAGGGTGTGCAAATTTGTATCAATGGCATATAAGGGAAGAACCAAATTTCATGGCATATAAGGGATCAGACCAATTTTCAGTGGCATATAAGGTATTCTCTCATATTCCTTATTTTTAATTCCGAATTTCAGTTATTTTTAAATTGTATTCCTACTTGGACTCTCCTTTTCTTTTCTAATTTCGGATTTTATTTTGGTTTTATTCCGAATTTGATTAATCTCGTATTGGGTTCTTATATAGACCCATCTTTCAATATTCCTTATTTTTAATTCCGAATTTCAGCTATTTTAAAATTGTAT…	CAGAAGGATAAATACGTTTTTTTCCTTGAGAATTAACGGTCAACACACGGTTAACTGACGGGAGTGGCATAAGAGGGTGTACAAATTTGGATCAATGGCATAAAGGGAAGAACCAAATTTCATGGCATATAAGGGATCAGACCAATTTTCAGTGGCATATAAGGGATTCTCTTATATTCCTTATTTTTAATTCCGAATTTCAGTTATTTTTAAATTGTAATCCTACTTGGACTCTCCTTTTCTTTTCTAATTTTGGATTTTATTTTGTTTTTATTCCGAATTTGATTAATCTCGTATTGGGTTCTTATATAGACTCATCTTTCAATATTCCTTATTTTTAACTCCGAATTTCAGCTATTTTAAAATTGTATTTCTACTTGGACTCTTCTTTTTCTTTTC…
344	Chr01	28162266	29080919	ATCACATCGTTCCAATTTCAACCAAATTTTCTG	A	32	ACGTTCGATGTGACAGGGTGTAAAATTTTGGGGTGGAATGTGAACAGGGTCTCAGTGTTGGTATTGTCAAGATCCAGAGTAGGTCCATCATATGGCACAACAAAACAATACGATACCGTAATGGCAACAGACAAGGGTCAAGTAATTTGATTGATTCACTTCTTACTTCTTATAGCTAATGTTTTAGCTATTAGCATGGAGTCTCCCACTTTTCGAATTTGCGCTACTATTGTACATTGCGGCCGTGTTTAGATCTAAAGTTTTTCTTCAAACTTCCAACTTTTCCATCACATCAAAACTTTCCTACACACAAACTTTTAACTTTTCCGTCACATCGTTCCAATTTTAATCAAACTTCTAATTTTGGCGGGAACTAAACACAGCCTGCATCTAGGACGG…	TTCGATGTGACAGGGTGTAAAATTTTAGGGTGGAATGTGAACAGGGTCTCAGTGTTGGTATTGTCAAGATCCAGAGTAGGTCCATTCATATGGCACAACAAAACAATACGATACCGTAATGGCAACAGACAAGGGTCAAGTAATTTGATTGATTCACTTCTTACTTCTTATAGCTAATGTTTTAGCTATTAGCATGGAGTCTCCCACTTTTCGAATTTGCGCTACTATTGTACATTGCGGCCGTGTTTAGATCTTAAAGTTTTTCTTCAAACTTTTAACTTTTCCATCACATCAAAACTTTCCTACACACAAACTTCCAACTTTTCCGTCACATCGTTTCAATTTTAATCAAACTTTCAATTTTGGCGGGAACTAAACACAGCCTGCATCTAGGACGGA…
345	Chr01	28226268	29140363	C	CACTACAAAATATTGCAGATAAAAGAAGCAC	30	GCTCACCTTCTTGACACCACGGATCTTCTTAGCTCTGTTCTTGCGTTCTTTCATTTGCTTGCGAGATTTCTCAACCTTGGTAGCAAGACCATTCTGACAAAAAGGAACAAAATGAAGTAAATTTACAGGAACAACATACAGGAGAATATGGCGCTGGACACAGATACAACTAGTTAATTGCTCTCCACAACGAAGAAATGTGCAACTCATAGACAACTAACTAGACATGACAAGTCCACCTTTAGTGGCTTAATCAAAAGTCACAAAATCAAATCTCACCGTTCCTTTCTAATCATGTATTACTCCTAACATAAGAGATCAACAATGGAGAAGGCGACGATTGGTTGGTGTTGTTGCATCTCATCAAAAGAGATGCATGGCATTTCATTGGAGCACTAT…	GCTCACCTTCTTGACACCACGGATCTTCTTAGCTCTGTTCTTGCGTTCTTTCATTTGCTTGCGAGATTTCTCAACCTTGGTTGCAAGACCATTCTGACAAAAAGGAACAAAATGAAGTAAATTTACAGGAACAACATACAGGAGAATATGGCGCTGGACACAGATACAACTAGTTAATTGCTCTCCACAACGAAGAAATGTGCAACTCATAGACAACTAACTAGACATGACAAGTCCACCTTTAGTGGCTTAATCAAAAGTCACAAAATCAAATCTCACCGTTCCTTTCTAATCATGTATTACTCCTAACATAAGAGATCAACAATGGAGAAGGCGACGATTGGTTGGTGTTGTTGCATCTCATCAAAAGAGATGCATGGCATTTCATTGGAGCACTAT…
346	Chr01	28227609	29141744	ATACAAAATTTATATATGTGTATACAAAGTTTATA	A	34	CGCCGCCACCGGGAGAGGAGAGGAGAGGAGAGGAGAGGAGGAGGAGCGCGGCAGAGGTTTGGCTGGCGGCACGAAAACCCTAGGCGAGGGTGCTGCGATCGCTTATATACGGTGGGCTTGTAGCTGGAGGCGGAGGAGCTTTGAGATTTGAGATTTGTATCCGGAGGCCCATACTTTGATTCTTTGCCTTGATGGGCTTCGGGCCCACTATGAGGTTTACGTTACGAGACATTATTTCTCTCGGCCCAAATGATGCCTGGAGTACCTTTTCTTTTTCTTTTCTTGACTGCTATAAGGCTGTAGGTATTGATGTGGGTGCCCCTAATGGGCGATCAGTCGCGCCTCACGCTGGACGCGCGGTCAGTTTATGCCCTCTGGTCTCTCTCCTCTACTACAGGT…	GGGAGAGGAGAGGAGAGGAGAGGAGAGGAGGAGGAGGAGGAGGAGGAGGAGGAGCGCGGCAGAGGTTTGGCTGGCGGCACGAAAACCCTAGGCGAGGGTGCTGCGATCGCTTATATACGGTGGGCTTGTAGCTGGAGGCGGAGGAGCTTTGAGATTTGAGATTTGTATCCGGAGGCCCATACTTTGATTCTTTGCCTTGATGGGCTTCGGGCCCACTATGAGGTTTACGTTACGAGACATTATTTCTCTCGGCCCAAATGATGCCTGGAGTACCTTTTCTTTTTCTTTTCTTGACTGCTATAAGGCTGTAGGTATTGATGTGGGTGCGGCGATCAGTCGCGCCTCACGCTGGACGCGCGGTCAGTTTATGCCCTCTGGTCTCTCTCCTCTACTACAGGT…
347	Chr01	28296339	29222098	ATATATATATATATATATATATATATATATATATATAT	A	37	TGCCGGCTGCCGCCGCCTGCGGCCCCGCCGGGAGGAAAGGGGAGGATCGATCTGTGTGAGGAAGTGGTTGCGATTGTGGAGGAGAGGATAAGTGCTAGGGATTATATACTACGTGTTGAATTTTAGTTCCGGTTGGTAAATACCAACCAAGAGCAAAGATCTAGATGATCTAAAGTGGTGATGTTTAGTCCCAGTTGATCCTCGGCCCGCTGACATGCCTGTGACAGGGAATGAACCGGGACTAAAGATCATAGAATGGCTGTGGGGTTTTCAACCGGGGCTAAAGATCATTTTTAGTCCCGGTTCGTTTTTGAAACTGGGACTATTGTGGTTTTGGGTCGACCCAGCAAAGATCAGTTCTCCAGCAGTGTGTAAATATCTGAGAATAGTACTTATGTA…	GCGGCCCCGCCGGGAGGAAAGGGGAGGATCGATCTGTGTGAGGAAGTGGTTGCGATTGTGGAGGAGAGGATAAGTGCTAGGGATTATATACTACGTGTTGAATTTTAGTTCCGGTTGGTAAATACCAACCAAGAGCAAAGATCTAGATGATCTAAAGTGGTGATGTTTAGTCCCGGTTGATCCTCGGCCCGCTGACATGCCTGTGACAGGGAATGAACCGGGACTAAAGATCATAGAATGGCTGTGGGGTTTTCAACCGGGGCTAAAGATCATTTTTAGTCCCGGTTCGTTTTTGAAACTGGGACTATTGTAGTTTTGGGTCGACCCAGCAAAGATCAGTTCTCCAGCAGTGTATAAATATCTGAGAATAGTACTTATGTATACATATATATATATACA…
348	Chr01	28298670	29224486	GGTAGGCGGCCGGGCAGGCGGGCGGCGAGGCCCGCGAGGCG	G	40	TTGTCGGGTCGAGTTAGGTCCCAGCTCATTTTTAGTCCCGGTTGGTATAAACAACCGGGACTAAAGATCTATTTTTAGTCCTGGTAAAAATAGATCTTTAGTCCCGGTTGTTTATACCAACCGGGACCAAAAATCAACTGAGCCGCGCGCACCAGTCCACCATCCTCTCCCCTCTCATTAATTATCCCTTATCCCTTCGATCCCACCGTCCTCTCCATCCCTTCGCTAGCTAGCTTATCCCTCTCAGCCTCAACCTCCTCCATCCATTCTCCTCTCACCTTCCTCCCCCTTCTCTTCCTCCTCCTCCTCCTACCACGTGAGGCCGAGCGGCAGCGGCAGGGAGGCGGGCAGCCGAGCAGGCGGCAGGCGAGGCCGGCGAGGCGGCGGGCGGCCGACGAG…	AAACAACCGGGACTAAAAATAGTTACCAACCAGGACTAAAAATAGATCTTTAGTCCCGGTTGTTTATACCAACCAGGACTAAAAATAGATCTTTAGTCCCAGTTGTTTATACCAACCGGGACCAAAAATCAACTGAGCCGCGCGCACCAGTCCACCGTCCTCTCCCCTCTCATTAATTATCCCTTATCCCTTCGATCCCACCGTCCTCTCCATCCCTTCGCTAGCTAGCTTATCCCTCTCAGCCTCAACCTCCTCCATCCATTCTCCTCTCACCTTCCTCCCCCTTCTCTTCTCTTCCTCCTCCTCCTCCTACCACGTGAGGCCGAGCGGCAGCGGCAGGGAGGCGGGCAGCCGAGCAGGCGGCAGGTGAGGCCGGCGAGGCGGCGGGCGGCCGGCGAG…
349	Chr01	28300150	29225865	A	ACATAAGCTGTTCCAGAATGTAGTTGTCTAAA	31	GTGGGGCCCCAAGTTGCCGACCGGAACACGACTGCAGCAGCATATCCCTTGCCGCTGTTCGTCGGGGGCTTTCTTCTTGGCGCGCGTCTTTCTTGGCAATGCTGTATTGCTGTGCCTGTGCCCTGTGAGCCTCTGACCTCCGTTCTTGTTTGAGTTGCCAATCAGGCTGTATTGAATCAGCCATGGATAAGCTTGAGGCTTTAGCCCTTGGGAGCAGCCATAGCCCAAGTACGCGACGCCAACCTCGCCGCGGCATGGCTCGAGTCCTGCTCCGACGAGAGCCTCCTGCGATCTGCGCCTCGGCCTATCCTCCCCTTACACGCTGCCGCCGCAAAAAGATCCCTCAGTTGCCTCGACCGATAAATCTTAGTGACATTTTGGATGATCTCGTTCAGTCAT…	GTGGGGCCCCAAGTTGCCGACCGGAACACGACTGCAGCAGCATATCCCTTGCCGCTGTTCGTCGGGGGCTTTCTTCTTGGCGCGCGTCTTTCTTGGCAATGCTGTATTGCTGTGCCTGTGCCCTGTGAGCCTCTGACCTCCGTTCTTGTTTGAGTTGCCAATCAGGCTGTATTGAATCAGCTATGGATAAGCTTGAGGCTTTAGCCCTTGGGAGCAGCCATAGCCCAAGTACGCGACGCCAACCTCGCCGCGGCATGGCTCGAGTCCTGCTCCGACGAGAGCCTCCTGCGATCTGCGCCTCGGCCTATCCTCCCCTTACACGCTGCCGCCGCAAAAAGATCCCTCAGTTGCCTCGACCGATAAATCTTAGTGACATTTTGGATGATCTCGTTCAGTCAT…
350	Chr01	28313400	29239142	ATTTCGTAGTAAAACTCTTGTTTGAATTGAGGCCCCAACAGAGCAGATCTTGCCTA	A	55	TTCCCTTCTTCCTCAGCACGACAGAGTTTCCTCCACTGCAACAACAGAGAAATAATTTGAAACGGCAAAGTTAGTGGTGAGTAAAGCAGGGTTTTCCTGAAAACCATGTTGTTTCTTGTCAGCCACAAACACCAGCAAATGGCAGCCAGCAACATAATATGTAATCTATCATTAATAAATGCAAAGCTGTGGTTGCATAAGAGAAAAAACTCATCAAGATTTTTAGGAGGGTAAGGCCAGTTCAGAACATCTCTGCACCAACACCACACAAAGCGAGCCATAGGGCATACAAAAAGGATGTGATTAGTAGACTCAAAATCTCCACACATGCCACAATTAACATCCCCCCATCCTTTCTTTTGCAATTGTTCAGCAGATTGAATACGATCTCTGTGAGCC…	CCTTCTTCCTCAGCACGACAGAGTTTCCTCCACTGCAACAACAGAGAAATAATTTGAAACGGCAAAGTTAGTGGTGAGTAAAGCAGGGTTTTCCTGAAAACCATGTTGTTTCTTGTCAGCCACAAACACCAGCAAATGGCAGCCAGCAACATAATATGTAATCTATCATTAATAAATGCAGAGCTGTGGTTGCATAAGAGAAAAAACTCATCAAGATTTTTAGGAGGGTAAGGCCAGTTCAGAACATCTCTGCACCAACACCACACAAAGCGAGCCATAGGGCATACAAAAAGGATGTGATTAGTAGACTCAAAATCTCCACACAAGCCACAATTAACATCCCCCCCCCATCCTTTCTTTTGCAATTGTTCAGCGGATTGAATACGATCTCTGTGAGCC…
351	Chr01	28345200	29281230	TACTGTCATAGAACCTTAAGTGTATGGTTTGTGTGAGTTTAGGGATAC	T	47	GTGGGTCTGCATCGTGGCGCGCTTGTCACCGCCGTCGCTGCCGCACGGTGAGTCCCACCTCCATGATGCGCATCCTCCCAGCCAGGGACACGGACCCGAATGCGACGAGCCATACCGCGGCCGCCGTCAACGCTTTAGATGGCTGCAGAAGTTGGGCTGCGGCGCCGTGGAAGGAGCATCCTCGTGGTAGTCGGACGAGCTGTCGGAGGAAGCCGATAGGGACGGCGACGTGGAGGACGCAGGCGCCGGTGTGATCCTCTTCTCACCCCCACCACCGGCTATGGCCGCGGCAATGTTGTTGTTGTTGTTGTGATCCCCCTCGTCGGACGGAGCATAGGCAGCGGCTCCGGGCACGGGAGGAGCAGAGGGGCGGGGTAGTGTGGCGGGCGAGCACCGGCT…	TGCATCGTGGCGCGCTTGTCACCGCCGTCGCTGCCGCACGGTGAGTCCCACCTCCATGATGCGCATCCTCCCAGCCAGGGACACGGACCCGAATGCGACGAGCCATACCGCGGCCGCCGTCAACGCTTTAGATGGCTGCAGAAGTTGGGCTGCGGCGCCGTGGAAGGAGCATCCTCGTGGTAGTCGGACGAGCTGTCGGAGGAAGCCGATAGGGACGGCGACGTGGAGGACGCAGGCGCCGGTGTGATCCTCTTCTCACCCCCACCACCGGCTATGGCCGCGGCAATGTTGTTGTTGTTGTTGTGATCCCCCTCGTCGGACGGAGCATAGGCAGCGGCTCCGGGCACGGGAGGAGCAGAGGGGCGGGGTAGTGTGGCGGGCGAGCACCGGCTCCCTCAC…
352	Chr01	28403298	29339377	CGTTTATATCTCATTACCTTCACAGAAAAAAAAATACTACTACA	C	43	GACATCAAATTTGTAGTTTTGAGATATAATGATTTAAATCTATAATTTTTTGATAAATATATTCTTAAATTTGTAGTTTAGTGATAATTTTATCAAAGTATATGTAGTTTTGCAAAATTTACTCAATATATTAATTCCTTGTTGATGCATAAGTTACTACTCTTAACTTTTTGACAGAAGGGATTTTAACCCTACTTAGTTTTGGTACTAAAATTGTACTGGTAATTTTTCAAACTTCTACTCTTTTTTTATGTTGGTCTTCGTGTCCATAACCAACACCAACAGAGAAACTTTCTTGGATGACCTTCTCTTATTTTTGTATGAAATTCTCACGGACATTAACCAACAACTGACTTCAAAATAGATGACGTGAATATTTATATGAGCGTCAGTCTTTGC…	GACATCAAATTTGTAGTTTTGAGATATAATGATTTAAATCTATAATTTTTTGATAAATATATTCTTAAATTTGTAGTTTCATGATAATTTTTTCAAAGTACATGTAGTTTTGCAAAATTTACTCAATATATTAATTCCTTGTTGATGCATAAGTTACTACTCTTAACTTTTTGACAGAAGGGATTTTAACCCTACTTAGTTTTGGTACTAAAATTGTACTGGTAATTTTTCAAACTTCTACTCTTTTTTTATGTTGGTCTTCGTGTCCATAACCAACACCAACAGAGAAACTTTCTTGGATGACCTTCTCTTATTTTTGTATGAAATTCTCACGGACATTAACCAACAACTGACTTAAAAATAGATGACGTGAATATTTATATGAGCGTCAGTCTTTGC…
353	Chr01	28418121	29356345	A	ATTGACGTGGCATTAGAATTAAAAACATATA	30	AGACAATACACATCGTGAAACTACTCGCTTTGTAGTTGAGAGTCCGAGATCAAAACGACCTTGGTTTCATAGGGAATTTCTTACTAGGTCGTAACTATGGACATGTGCCACATCCAACCTATAAATAGTCCAGTTTAACAGAGCAGCAGAGTTTGACAACAAATCAAAGCATATGCTTGGCAAACAGTAGTGTTATCTTTTTTTTTTAAGGAAACCGAAGTGTTTGTATGTATACAGAAACACATATTTTGTACGGGTTAACACTTAATGAATGGGATATATAGGTCAGAAGTCCTAAAATGCTTAGCATTCTTGTGAGGAATAAGTTCACTTTGACTCCCATAATTAGCGACCGAATCTGATTTGTATCCTTAACCATAATACCGGATATCTCGATCC…	AGACAATACACACCGTGAAACTACTCGCTTTGTAGTTGAGAGTCCGAGATCAAAACGACCTTGGTTTCATAGGGAATTTCTTACTAGGTCGTAACTATGGACATGTGCCACATCCAACCTATAAATAGTCCAGTTTAACAGAGCAGCAGAGTTTGACAACAAATCAAAGCATATGCTTGGCAAACAGTAGTGTTATCTTTTTTTTTTAAGGAAACCGAAGTGTTTGTATGTATACAGAAACACATATTTTGTACGGGTTAACACTTAATGAATGGGATATATAGGTCAGAAGTCCTAAAATGCTTAGCATTCTTGTGAGGAATAAGTTCACTTTGACTCCCATAATTAGCGACCGAATCTGATTTGTATCCTTAACCATAATACCGGATATCTCGATCC…
354	Chr01	28452723	29396393	C	CGTGCTTGCCTCCTCTGCCGCACCCCGCCGCC	31	ATTGAAACATTATGTGAATTATGTTGGATGATAATTTAACATGTTTATATTTGAAAAGCTTTTAAATTATAAAAACTATAAAGATATAGCATGTTTCCATAATGTTTAAATGTGATGATTGTTAGTGGATGATGATGTGGCATCTTGTTAGTGGATGATGATGTGGCATCTTTGCATGTTAAGCTTAAGAAGTTAGTGGGGGATAACTTTATAGTAAGATATGATTACTCTATATTAGAGTATAGTTGGCCATTCGGCCCGACGCCCGACGACTCGACCCAAGGCACGGTATTTTGGCTCGGCCCAAGCACGGCCTGGCCCGACGGGGTTGGGCCTGTGCCGGCCCGACGCGGCCGCCGGGTCGTGCCTGGGCCCCTCCATCGGCACATTGGGCAGGCC…	ATATCATAAAACATAATAAAGATATACATTGAAACATTATGTGAATTATGTTGGATGATAATTTAACATGTTTATATTTGAAAAGCTTTTAAATTATAAAAACTATAAAGATATAGCATGTTTCCATAATGTTTAAATGTGATGATTGTTAGTGGATGATGACGTGGCATCTTTGCATGTTAAGCTTAAGGAGTTAGTGGGGATAACTTTATAGTAAGATATGATTACTCTATATTAGAGTATAGTTGGCCATTCGGCCCGAGGCCCGACGACTCGACCTACGGCACGGTATTTTGGCTTGGCCCAAGCACGGCCTGGCCCGACGGGGTTGGGCCTGTGCCGGCCCGACGCGGCCGCCGGGCTGTGCCTGGGCCCCTTCATCGGCACATTGGGCAGGCC…
355	Chr01	28467674	29409070	TATGTTTTCTAAGAATGCTGAGGTAGTCCACT	T	31	CTTGTAATGGCCTATGAGAACGTGACTGATAATTCCAATGTTAGATCCATGAACTAGCTTTGCTCATAGGATAAGTAACAAAATGGAGTAATTTGTTCTTTTCATTATGTTTTAGATGAATCAGCCTTTTGAGTGGCACCAATACTGTACTTTTGAGATTAGAAACAAAGTACTGAACTTTTGAGCGTTCTGAATCTATATAGTAGGTATGAGAGACTAGTGCTTCCTAGTAGGGGCTCCAAACAATTCTTGAATATGGCGATGGTCTCTCACATAGTGAAAGAAATGTGCCAGCCATTGTGCCATTCTGCATGCTTCTTATAAAGAAATCTGGGCGTGATGATCTCATCTAGTGGGAAATTAAATAAGTGCTAAAACTTCCTAATTTAACTTTGTGGT…	CTAGATTGAACTTGTAATGGCCTATGAGAACGTGACTGATAATTCCAATGTTAGATCCATGAACTAGCTTTGCTCATAGGATAAGTAACAAAATGGAGTAATTTGTTCTTTTCATTATGTTTTAGATGAATCAGCCTAAAATTTGAGTGGCACCAATACTGTACTTTTGAGATTAGAAACAAAGTACTGAACTTTTGAGCGTTCTGAATCTATATAGTAGGTATGAGAGACTAGTGCTTCCTAGTAGGGGCTCCAAACAATTCTTGAATATGGCGATGGTCTCTCACATGCCAGCCATTGTGCCATTCTGCATGCTTCTTATAAAGAAATCTGGGCGTGATGATCTCATCTAGTGGGAAGTTAAATAAGTGCTAAAACTTCCTGATTTAACTTTGTGGT…
356	Chr01	28527113	29455639	AACGTATGTGGTATCCATAACTGACACAAGCATTATCACG	A	39	GTCGTTGCTCTTATTCACCATAATCACACCAGTACAATATTTGGGGTAGCCTATCTAACTGTTGTCGACTTGGCTGTCTGAAGTGCTAACTCGTAGTTGACAACAGGGTAGCTTTCCTTCTCGAATCTACATCCGGCGAGATCAAAGACAACGCTATGTCTCTCCTGACAATATCCGTAGACATCGTAGGGGACTAGCCATGCTTATCTCTGAAGCCAATATCCGGCGTCTTGTCTTGGCGCATGTTGGCTTGTATGTTGATCTCATGTCTTGATCTATTGTCCCGTGTCCCCTCTCCTCCTAGGGGCCTTGTATTTATACCCATAGATGTCCCCTTGTCTAAGTAGAACTAGGGAAATCAATATGGATACAATCCGAGCAGTCCTTGTCGTTTCAATG…	GTCATTGCTCTTATTCACCATAATCACACCAGTACAATATTTGGGGTAGCCTATCTAACTGTTATCGACTTGGCTGTCTGAAGTGCTAACTCGTAGTTGACAACAGGGTAGCCTTCCTTCTCGAATCCACATCCGGCGAGATCAAAGACAACGCTATGTCTCTCCTGACAATATCCGTAGACACCGTAGGGGACTAGCCATGCTTATCTCTGAAGCCAATAACCGACGTCTTGTCTTGGCGCATGTTGGCTTGTATGTTGATCTTATGTCTTGATCTATTGTCCCGTGTCCCCTCTCCTTCTAGGGACCTTGTATTTATACCAATAGGTATTCCCTTGTCCAAGTAGAACTAGGGAAATCAATATGGATACAATCTGAGCAGTCCTTGTCGTTTCAATG…
357	Chr01	28571963	29500913	AATTCAATCAGCGTAATTGATAAAACACCTA	A	30	CTGCTTATCAAGCAAATATCTTCAGTGGGAACACACTTTAAAAAGAGGCAGAAGTATACAGAGAGATGAAAACTAACAATTATACTTCCAACAGTTGCAAATATGGGAGATGCCATATTTGTATATACTTTTTTTTGTTAACAATGCTCCAAGCATATTGAAGATCTTTTTTCTGAACAAACTTAAAAAGTCAGAAGGCCATTTATTATCATCTTCTTGTTCTTCTTTTGCCTGAACTTTAAAAAGAAAATCATCGCACTACCTTGGCATACAACTTTTTCAGTTGACTGAGCATTTCGTAATAAGTTTGACTACCTTAAGTAAAAAAGTTTTGAATCTTATAATATGATGCAGCAGGAATCCAGGATCAGTCAAAAGAGTCAAGTTATTGACATTTCA…	ACTGCTTATCAAGCAAATATCTTCAGTGGGAACACACTTTAAAAAGAGGCAGAAGTATACAGAGAGATGAAAACTAACAATTATACTTCCAACAGTTGCAAATATGGGAGATGCCATATTTGTATATACTTTTTTTTGTTAACAATGCTCCAAGCATATTGAAGATCTTTTTTCTGAACAAACTTAAAAAGTCAGAAGGCCATTTATTATCATCTTCTTGTTCTTCTTTTGCCTGAACTTTAAAAAGAAAATCATCGCACTACCTTGGCATACAACTTTTTCAGTTGACTGAGCATTTCGTAATAAGTTTGACTACCTTAAGTAAAAAAGTTTTGAATCTTATAATATGATGCAGCAGGAATCCAGGATCAGTCAAAAGAGTCAAGTTATTGACATTTC…
358	Chr01	28575075	29503984	CCCGTGCAATTACCTTTACAATGTTTATTTATACT	C	34	CACGGATAGCAAAAAACCGAGAAAGACAGGGAAAACGACGATACCATCGGTTTTAGGTGTGGATCCGGCGCAACCCATGGCGACGGCCGGTCAGACGCTCATGAGTGAGAGCGACCTTCCCCCTGGGGAAGCTTCTGGAAGCTGGCGCGGCTTCTGGCGTGTGGATTGGCGGCTGCGGGTTCGGGGGAGAGGACGATGCGAGAGAAAAAGCGGTGGATTAAAAGGGGGGAAGTGGAGCAGCAGTGGGGGGGAGGGACGCATCTCGGCATGTGATTAGCTAGCTAACCAACAAAAACCGGTGCGGGGGTGCAGAGGTGGCGCCGAGCCGAAGGCCGAATTCGTCAGTACTAGTATTTCTTTTTCCCCGATTTCCTTGGCCTTCTCGATGCACCGCGATGG…	AAAACGAAAACACGGATAGCAAAAAACCGAGAAAGACAGGGAAAACGACGATACCATCGGTTTTAGGTGTGGATCCGGCGCAACCCATGGCGACGGCCGGTCAGACGCTCATGAGTGAGAGCGACCTTCCCCCTGGGGAAGCTTCTGGAAGCTGGCGCGGCTTCTGGCGTGTGGATTGGCGGCTGCGGGTTCGGGGGAGAGGACGATGCGAGAGAAAAAGCGGTGGATTAAAAGGGGGGAAGTGGAGCAGCAGTGGGGGGGAGGGACGCATCTCGGCATGTGATTAGCTAGCTAACCAACAAAAACCGGTGCGGGGGTGCAGAGGTGGCGCCGAGCCGAAGGCCGAATTCGTCAGTACTAGTATTTCTTTTTCCCCGATTTCCTTGGCCTTCTCGATGC…
359	Chr01	28584865	29513776	G	GGTAATCAAGAGGAAGCCGGTGTCGCGGCGCGCGCTCC	37	GTGTGGTGTGGAGAGGCCGGCGGCGCCGTGAATCCGGGTGAGACCTGTCGCCTGAGCTGAGGGTAAGCTCGGTGTGTTGTCGGGGGCGATGAGGATCATGGTGCGCACGCTGCGCGGGGACTGGGTGGCGCTCGACGTGGACGGCGCCACGACGACGGTGGCGCAGGTCAAGGGCATGGTCATGGCCCGGGAGCGCATCGCGGTGGCCATGCAGCGGCTGTTCTTCGCTGGCCGGTGCCTCGACGACGACCACAGCACGCTCGCGGACTACGGCGTTCGGCACGACTCCGTCGTCTTCCTCAGCCTCCGCCTCGCCACCGACGCCTATCAGTACGTGCAAATTTCACGACGAACTGTTATGAATTTTTCGACAAACTGATAGATCGATCTATAGCAGGA…	GTGTGGTGTGGAGAGGCCGGCGGCGCCGTGAATCCGGGTGAGACCTGTCGCCTGAGCTGAGGGTAAGCTCGGTGTGTTGTCGGGGGCGATGAGGATCATGGTGCGCACGCTGCGCGGGGACTGGGTGGCGCTCGACGTGGACGGCGCCACGACGACGGTGGCGCAGGTCAAGGGCATGGTCATGGCCCGGGAGCGCATCGCGGTGGCCATGCAGCGGCTGTTCTTCGCTGGCCGGTGCCTCGACGACGACCACAGCACGCTCGCGGACTACGGCGTTCGGCACGACTCCGTCGTCTTCCTCAGCCTCCGCCTCGCCACCGACGCCTATCAGTACGTGCAAATTTCACGACGAACTGTTATGAATTTTTCGACAAACTGATAGATCGATCTATAGCAGGA…
360	Chr01	28587619	29516596	CTTAAAGCACATCCAATATAATGGTCTAAAT	C	30	GATTTTTGGACACCGGATGGGCTTCAAGATTCGTGTTGTACGCCTTCTCCTCCAACTCCGACGACCTCCTCTTCTTCTCCAGCGCCGGTGAGGACCCTACGGGTTAGGGTCCCGGGGTGGGGTGGGGTGGGGGTGGGAGGGGGAGGGGGCAGGGGAGGAGTTCGCCGGCTCTAGAGGGATGGCTGGGGGAGGCGGCAACTCGATGGTGGGTGGCGGATCGGGCGGGTGGCGACAGAGCCGTAGGGCTGGAGGAGGGCGGTGGGCCGGCGTTGGTGGCAGGGGCACCTTGCCGCCGACGGCTCGAGGAGGAAGGAGGGGAGGAGGGGGGAGGAGGAGGGGGAGGAGGCTGGTCGGGGGGGTCTCGCCGGCGCCATTGACGCCCTCCGGCCAGCCGGCAAG…	GATTTTTGGACACCGGATGGGCTTCAAGATTTGTGTTGTACGCCTTCTCCTCCAACTCCGACGACCTCCTGTTCTTCTCCGGCGCCAGTGAGGACCCTACGGGTTAGGGTCCCGGGGTGGGGTGGGGGTGGGAGGGGAGGGGGCAGGGGAGGAGTTCGCCGGCTCTAGAGGGATGGCTGGGGGAGGCGGCAACTCGGTGGTGGGCGGCAGATCGGGCGGGCGGCGACAGAGCCGTAGGGCTGGAGGAGGGCGGTGGGCCGGCGTCGGTGGCAGGGGCACCTCGCCGCCGACGGCTCGAGGAGGAAGGAGGGGAGGAGGGGGGAGGAGGAGGGGGAGGAGGCTGGTCGGGGGGGGGGGGGTCTTGCCGGTGCCATTGACGCCCTCCGGCCAACCGGCAAG…
361	Chr01	28612983	29541874	A	ACTACTAGCGAAGCTTCGCTTGGCTGGCTGGTG	32	CTAGCTTGTGCAGCAGGGGAGGGCTCGAGCGTTTGGAGCGGCCATGTGCAACGGTTGGCGAATTGGCGCGGTTGGTGGCCACCACATCAGACGGACCGGTAGATAGACAGGAGATGGTTGGCGGCGAATCGCGCCAACCGGGGACTCGCGTACCGCTTTCTCCTGCGCCGTCGCCATCGGCGGCGCGTCGATCGACCGAACCGTCCTCTCCCCGCGCGCGCAGGCCACGGCCCACGGGCAAAAGCCCCAGCCGGGATTCCGCGCCTTTGTACGCATCTTGGAGTATACGGACAGCCTCGTCGTCTGAATATGCTAAATGGAATATTTGCAAACGAAAATTAATTTATAAATAAAACTTTTATATATGTGTTTTTAGCGATCTAAAAGCAAAAGACTGAA…	GCTAGCTTGTGCAGCAGGGGAGGGCTCGAGCGTTTGGAGCGGCCATGTGCAACGGTTGGCGAATTGGCGCGGTTGGTGGCCACCACATCAGACGGACCGGTAGATAGACAGGAGATGGTTGGCGGCGAATCGCGCCAACCGGGGACTCGCATACCGCTTTCTCCTGCGCCGTCGCCATCGGCGGCGCGTCGATCGACCGAACCGTCCTCTCCCCGCGCGCGCAGGCCACGGCCCACGGGCAAAAGCCCCAGCCGGGATTCCGCGCCTTTGTACGCATCTTGGAGTATACGGACAGCCTCGTCGTCCTAAATGGAATATTTGCAAACGAAAATTAATTTGTGAATAAAACTTTTATATATATATATGTGTTTTTAGCGATCTAAAAGTAAAAAGCTGAAA…
362	Chr01	28706297	29643544	GTTAATGAATCTAGGCATCATTAACATCTACTCC	G	33	TTTTGTGAGCATGACCGAGTTTAGTTCCAAACTTTTTCTTCAAACTTCCAACTTTTCCATCACATCAAAACTTTCCTACACACACAAACTTCTAACTTTTCCGTCACATCGTTCCAATTTCAACCAAACTTCCATTTTTAGCGTGAACTAAACACACCTATGTCAATAAAAGCATAATCTTAAACCCCACGATTATACCCGCAGCAACACATGAACACACGGTAGGTTCGTCTAGTAAGGGAGCAAGCACATATAAATAATGGATACTCCATCTATTTTAGGTTATAAGATGTTTTGACTTTGATCAAAATCAAACTGCTTCAAGTTTGACTAAGTTTTTAGACAAATATAATAATAATATTTACTTTACCAAAATAGTTTTATTAAATTAATAATTAA…	TTTTGTGAGCATGACCGAGTTTAGTTTCAAACTTTTTCTTCAAACTTCCAACTTTTCCATCACATCAAAACTTTCCTACACACATAAACTTCTAACTTTTCCGTCACATCGTTCCAATTTCAACCAAACTTCCATTTTTAGCGTGAACTAAACACACCTATGTCAATAAAAGCATAATCTTAAACCCCACGATTATACCCGCAGCAACACATGAACACACGGTAGGTTCGTCTAGTAAGGGAGCAAGCACATATAAATAATAGATACTCCATCTATTTCAGGTTATAAGATGTTTTGACTTTGATCAAAATCAAACTGCTTCAAGTTTGACTAAGTTTTTAGACAAATATAATAATAATATTTACTTTACCAAAATAGTTTTATTAAATTAATAATTAA…
363	Chr01	28718277	29655518	C	CGACGTGGTTCCCCGGCCTCCCCTCCCAGAT	30	AGGCATGCATGTTTCTCCCCTCTACCATGTCGTCCTCCAGACAGCGATACAATCACGCGGCCGCGTCATAATAGTCATTTCCCGGCCTTAATTCACGTACCAGCACTACTAAAAAAGTATTTTTTTTCTAACGTAGGAGTCTTTTTTTCGCAGGCGGACATGAGCCTGGGAGTCAAATGACCGCCAACAAAAATATAAATCGGGGTGAAATTCGTTGTCCGTCTGCGAAAATCCTGCAAAAATCGTACCTACCGAAAAAAAACTTTGATCCTTATCTATTGCTCCAACCCCCTCCCCACCACTCATTTCTATCTTCTCAACTCTCTCTCCCTCCACCACCGGCTTTTCAGCACCCCATCCCCTCCCCTCCCTCCCTCCACCGGCGGCGGAGGCGGCCGC…	AGGCATGCATGTTTCTCCCCTCTACCATGTCGTCCTCCAGACAGCGATACAATCACGCGGCCGCGTCATAATAGTCATTTCCCGGCCTTAATTCACATACCAGCACTACTAAAAAAGTATTTTTTCTAACGTAGGAGTCTTTTTTTCGCAGGCGGACATGAGCCTGGGAGTCAAATGACCGCCAACAAAAATATAAATCGGGGTGAAATTCGTTGTCCGTCTGCGAAAATCCCGCAAAAATCGTACCTAAAAAAAAAAACTTTGATCCTTATCTATTGCTCCAACCCCCTCCCCACCACTCATTTCTATCTTCTCGACTCTCTCTCCCTCCACCACCGGCTTCTTAGCACCCCATCCCTTCCCCTCCCTCCCTCCACCGGCGGCGGAGGCGGCCGCGGA…
364	Chr01	28726221	29663380	ATATCTAGAATTGCATATGGAATATTCTAGTATGATAAA	A	38	TGTAAAACACAATACGATATTAACTAAAAGTTTAAATAATAAGTAAATTCTGGAATTAGAAAAATAGAAATAAGAGTTTAAGTAGAAATACAATTTAGAAATAACTAAATTTAAGATAAATAATGAAAATATTTTAAAGAAAAGATCACAAAGGACACAACACGAGATTAGGTAAAATCCGAAATAGTAAATAATCACGTGTCATATGCTGCACCACGAGTCCACAACTGCCAGTTGACTCTTCCATTTTCATACGTGTAATTACAGAACAGAACGCTTGTTTCTCTCATGTGCCGTGTCTTCCTCCAGACCCCATCAGTCACGTGGCCGCGTTATAATAGTCATTTATTTTTTTTGTCGAAACAATAATAGTCATTTACTATTGGCCAAACGAATCAT…	GTAAAACACAAGACGATATTAACTAAAAGTTTAAATAATAAGTAAATTCTGGAATTAGAAAAATAGAAATAAGAGTTTAAGTAGAACTACAATTTAGAAATAACTAAATTAAAGATAAATAATGAAAATATTTTAAAGAAAAGATCACAAAGGACACAACACGAGATTAGGTAAAATCCGAAATAGTAAATAATCACGTGTCATATGCTGCACCACGAGTCCACAACTGCCAGTTGACTCTTCCATTTTCATACGTGTAATTACAGAACAGAACGCTTGTTTCTCTCATGTGCCGTGTCTTCCTCCAGACCCCATCAGTCACGTGCCCGCGTCATAATAGTCATTTATTTTTTTTTGTCGAAACAATAATAGTCATTTACTATTGGCCAAACGAATCAT…
365	Chr01	28729915	29667058	CTGGTGAAATAACCGGGACTAAAGATCCCTATCTTTA	C	36	CGAGGTGGCTCATGGATTCTGACGGTGGAAGAGAGCTCCGGGAGCGGACTTTGGCGGCCATGCGAGAGGTGAAAGAGGCGCCAAGTGACAAAGGTGAGTCCAAAATGACGTTGTTAGAACTCGTAAGCCAGTGGAAAAGTGACTGAAAGGAGACGGATAGGGAGATGAACAGTAATGTTAACGGGCTAGCCTTCTGCACCGTTTGGTCCAAAATAAACATACCAGGTCATACTATAGTATATTTCCGCCAGAGTAGTAAAAATCCTTGTAGAATATTTAAGTTGGAGTGAATTGCATGCTGGATCATTTATTTTTATCAATGTTGTAGCTTAGACTAGAGGTAACACAATATTTTCAACATTTAACCGGGTAAGCTTGCAAAAGGTTTCTGCTTACACG…	GAGGTGGCTCATGGATTCTGACGGTGGAAGAGAGCTCCGGGAGCGGACTTTGGCGGCCATGCGAGAGGTGAAAGAGGCGCCAAGTGACAAAGGTGAGTCCAAAATGACGTTGTTAGAACTCGTAAGCCAGTGGAAAAGTGACTGAAAGGAGACGGATAGGGAGATGAACAGTAATGTTAACGGGCTAGCCTTCTGCACCGTTTGGTCCAAAATAAACATACCAGGTCATACTATAGTATATTTCCGCCAGAGTAGTAAAAATCCTTGTAGAATATTTAAGTTGGAGTGAATTGCATGCTGGATCATTTATTTTTATCAATGTTGTAGCTTAGACTAGAGGTAACACAATATTTTCAACATTTAACCGGGTAAGCTTGCAAAAGGTTTCTGCTTACACGG…
366	Chr01	28730791	29667841	TAGGTTGGACTAAAGATGATTTTTAGTCCCGGTTGGT	T	36	AAACCACATAGGCGCTGCTCGGCCGGCCGCTGTCGCCTCCTCTCCGCGCCAGCCGGCCACCGCCGCGCCGCCCTCCGCGTCGCCCTGCGGCCCTCCGCGCCGCCGCGCTGGCCACCGCACCGGCCGCCGCCCCGCGCGCGGCCCTGCGCGTCGCCACCGCGCCGCCCGCCGCCATGTTGGCCGCGCCGCCCGCCGCCCGGCCGGCCCTCGATCTCGCTCGATCCAAAAAAAAAAGAGAGGAAGGAAGAAAGAGATAAGGCAGGAGTTAGAGAGGAAGAAAGAAAGAAAGAGGTAGAGTTTGTTGCGTGGATGAGAGAAGAGGATAAGTAATAGGGATTATATAGTATGTGTTGATTTTTATTCCCGGTTAGTAACACCAACCGGGACTAAAGTTAGATC…	AAATACATCACAGAATCATGCAATAAATCACAAATTCTAAAAAAAAAGAAAAAAACCACATAGGCGCCGCTCGGCCGCCCGCCACCGTGCCGCCCTCCGCGTCGCCCTGCGGCCCTCCGCGCCGCCGCGCTGGCCACCGCACCGGCCACCGCCCCGCGCGCAGCCCTGCGCGTCGCTGCCGCGCCGCCCACCGCGCCGGCCGGCCCTCGATCTCGCTCGATCCAAAAAAAAAAAGAGAGGAAGGAAGAAAAAGATAAGGCAGGAGTTAGAGAGGAAGAAAGAAAGAAAGAGATAGAGTTTGTTGCGTGGATGAGAGAAGAGGATAAGTAATAGGGATTATATAGTATGTGTTGATTTTTATTCCCGGTTAGTAACACCAACCGGGACTAAAGTTAGATA…
367	Chr01	28734680	29671702	G	GCATCCACCGCCACCGCGCCCGTCGCGCGAAG	31	GAACTTATTGTAATATTCACAAAGTCAAAGGGCTAAAATGAAAAAAAATGAATCCTTATACACTCAGGCAGTACTGGCTAATGGGATAGGGAAATAATTTCCCACCCAAAAAAGACATTTAAATCCTAACCATTTATTCTACATCTTTCATTTAATCCTAACCCTTCCGGTTTGTTTGGTAACTTGAGGGAAAGGGATTGGGAGTTTAAGAGCCTGTTTGGTTGCTACCCTGAGAGAAGCATGTCTGGCCTTAGACAAGCCTGACCAAATATAGGTTTGTTTGGTTGCTACCGTGAGACTATTCTCCACTAGCCTGGCCTGACGGATACAGGCATGCAATTAGCCTGAGTCAGGCGACCGTAGGCTCCAGGCGCAACAAATGCGTGCTTACCATCAAAA…	CACAAAGTCAAAGGGCTAAAATGAAAAAAAATGAATCCTTATACACCCAGGCAGTACTGGCTAATGGGATAGGGAAATGATTTCCCACCTAAAAAAGATATATTTAAATCCTAACCATTTATTCTACATCTTTCATTTAATCCTAACCCTTTCGGCTTGTTTGGTAACTTGAGGGAAAGGGATTAAGAGTTTAAGAGCCTGTTTGGTTGCTACCCTGAGAGAAGCATGCCTGGCCTTAGACAATCCTGACCAAATATAGGTCTTGTTTTGGTTGCTACCGTGAGACTATTCTCCACTAGCCTGGCCTGACGGATACAGGCATGCAATTAGCCTGAGTCAGGCGACCGTTTTGGGTCGCCTGAGGCTCCAGGCGCAACAAATGCGTGCTTACAATCAAAA…
368	Chr01	28764418	29693305	CTGGTGAGGCCAAGCTGTGCGGCCCTTGATCCACGATA	C	37	ATATTCCTTATTTTTAATTCCGAATTTCTATTATTTCCTAATTGTATTTCTATATGGACTCTATACTTCTACTTCTAATATTCCTTATTTTTAATTCCGAATTTCAGTTATTTTCTAATTGTATTTCTATATGGACTCTAGTCTCCTCTTCTAATATTTCTTATTTTTTAATTCCGAATTTAAGCTATTTCTAAATTGTATTTCTATATGGACTCTAGTCTTCTCTTCTAATATTCCTTATTTTTTAATTCCGAATTTCAGCTATTACTTTTTTTTTCTTTTTCTCTGATTAATGTGAGAATTTCTAGGCCACGAGAGCGAATGTAGAGGCTCCTTTTTCTATTTCTTTAATAATATAATAGATAATAGATAGATGATTTACCAAGGCTCTTGTTCATA…	CGTGACGACGTGTGGGACGAGCCCTTGCCACCGGACGAGCTCCTTGCAAAAATTTGTAAATTGAAGGAATCATTATATATGGTATTTTGGTCTAGAGACGAATTTCAGATTCGGCGACAAGTTGAGAGACCTAAAGTGAACTTATCTCTTCCTTCATCGATGGAGCAGCCAAATAATCTTGATTGCGATCATATCAGATAAATGATGTAAGACGAATTATCTTTATTTGATCTGTCACCATATTGTACCTTCCACTTTTATTCTTTTTAAGCCTATAATTTTATCTTTTATCTAGACATATTCGCTACCTATGATGTTGTTCATATTTTGATAGTAGTACTCCTATGCCTTTACTAGCTTATTTCATATAAAAATGATTTACCAAGGCTCTTGTTCATA…
369	Chr01	28788481	29716976	TATGCGCAACATGTCGAACACGTACCGAGGTGGCAGAAAGACCGG	T	44	CTCCTTTCCTTCCTCCGCCATGGCCCATGTACCGGGGTCTCCGTCGCCACAACTCGGAGGGGGTCGGCTCTCTCCACTTATTACGGCTTTACCTGTGAGTAACCTAGTAACCTGTGTATCCCAATTGCTGGCTTACTTCTTGTCCCCTTGTTCTTTTTCTGCGAGGCTCTTGCTGTCGTTGTTCTTGCTGAAGCACGATATGATTGTTCTCCGGTTCTTCGATTGTGTGATACTAGATGCGAACATGTGTACTTTATAAACCGTTCCCCTTTTCTCATCTCTGCTTTGGTCGCCGACGCGAGAAGTGGAATCCGCACGCAAGTGCTAGATGTGTTTATTGCAGATTTAGCAACCGATCGACCTGTTGAAATTATAAGCACATGATAATTTAATTTATTT…	GGTGCTCCTTTCCTTCCTCCGCCATGGCCCATGTACCGGGGTCTCCGTCGCCACAACTCGGAGGGGGTCGGCTCTCTCCACTTATTACGGCTTTACCTGTGAGTAACCTAGTAACCTGTGTATCCCAATTGCTGGCTTACTTCTTGTCCCCTTGTTCTTTTTCTGCGAGGCTCTTGCTGTCGTTGTTCTTGCTGAAGCACGATATGATTGTTCTCCGGTTCTTCGATTGTGTGATACTAGATGCGAACATGTGTACTTTATAAACCGTTCCCCTTTTCTCATCTCTGCTTTGGTCGCCGACGCGAGAAGTGGAATCCGCACGCAAGTGCTAGATGTGTTTATTGCAGATTTAGCAACCGATCGACCTGTTAGAAATTATAAGCACATGATAATTTAATT…
370	Chr01	28793350	29721843	G	GCTACATGCCTACATCATAAGTTACTATTGTTAGTGTTTATTAATTTCAA	49	TGTGTGTGTCTAGTTGATAATATATACTTGCATGGGCAGTTCTAGCCTTCTAGCATGGCTGATAGTTGTTATGTGGTGGCAGATGGTTGTGGCGTGCAATCTTTTGTGGAGTTGAGCAATGCTGGCTCAAATCTGCTGATCTTTTCCCCCCTTTCATGTTCAACTTTAAGCATAGTTACTATATCTGGATGCTAGAAGTATTATGGTACTATCAATGCCCCAAGTGAACCTTGTGATATATTGTTTCATGGCTTTATGTTTTTTACCGGTTTTAGGCTAGTGGGATGTATTATGGTATTACTTTGTTTGCTGATATGAAATCTGGTAATCTGGTCCGTCTTCAGAGAGGTCATGTTGGAATTAACTTGAAAGTGAAGGTCCCAGCAGAGGGTTATTCGA…	TGTGTCTCTAGTTGATAATATATACTTGCATGGGCAGTTCTAGCCTTCTAGCATGGCTGATAGTTGTTATGTGGTGGCAGATGGTTGTGGCGTGCAATCTTTTGTGGAGTTGAGCAGTGCCGGCTCAAATCTGCTGATCTTTTCCCCCCTTTCATGTTCAACTTTAAGCATAGTTACTCTATCTGGATGCTAGAAGTATTATGGTACTATCAATGCCCCAAGTGAACCTTGTGATATATTGTTTCATGGCTTTATGTTTTTTACCGGTTTTAGGCTAGTGGGATGTATTATGGTATTACTTTGTTTGCTGATATGAAATCTGGTAATCTGGTCCGTCTTCAGAGAGGTCATATTGGAATTAACTTGAAAGTGAAGGTCCCAGCAGAGGGTTATTCGATA…
371	Chr01	28806415	29729915	ATATTTGTTCCTTACCTGTTGAAACGGCTTATCAGTTAGG	A	39	CCAACTCTCCCGAGCCGCCCCCTCGTCTCTACCGCCGCTCGCCCACGCATCGCCCGCGGCGGCCCCATGTCCACCGCACCGGCGGCGTCCGCCGCCGCGAAGGCGACCATCTCCGTCGAGTACGCCAAGTCCGGTCGGTCCTCCTGCAAAGTATGCAGCGAGGGCATCGCCAAGGGCGCGCTCCGCCTGGGCGCCTCCGCCCGCGACCCCCGCGGCTTCGACAGCACCAAGTGGTACCACGTCGCTTGCTTCCCCTCCTCGTCGCACCCGATTGACCCCGTCGAGAAGGTCAAGGGGTTCGACTCCATCAAGGTTTGGGCTCTGAGTCGGTTTACATTTGCTTCCTACGGGTGCTAATATGTTGATTTTGGGGGGAGTGCAGGAGGAGGATCGCGAGGA…	GCCCAACTCTCCCGAGCCGCCCCCTCGTCTCTCCCGCCGCTCGCCCACGCATCGCCCGCGGCGGCCCCATGTCCACCGCACCGGCGGCGTCCGCCGCCGCGAAGGCGACCATCTCCGTCGAGTACGCCAAGTCCGGTCGGTCCTCCTGCAAAGTATGCAGCGAGGGCATCGCCAAGGGCGCGCTCCGCCTGGGCGCCTCCGCCCGCGACCCCCGCGGCTTCGACAGCACCAAGTGGTACCACGTCGCTTGCTTCCCCTCCTCGTCGCACCCGATTGACCCCGTCGAGAAGATCAAGGGGTTCGACTCCATCAAGGTTTGGGCTCTGAGTCGGTTTACATTTGCTTCCCGCGGGTGCTAATATGTGGATTTGGGGGGAGTGCAGGAGGAGGATCGCGAGG…
372	Chr01	28847706	29767152	ACTTCCTCCGTTTCACGATGTAAGTCATTAC	A	30	ATGCATAAACAACAAATGAATATGTAGTGCTTACTAAAGGCATGGGAATCATCCTGGCTAGGAGATTTCACTGTCGGCCTCCAAGTTATGACACCCTACAATAATTTAAGAAAAAAAACTTAACCCAGGACATGGACAAAATATGCTTATGAATATGATACATTAGGGTGATAGCACTCTAGGGAACAGGAAAGAAAAGAATAGTGTGGAAAAATGTTTCTTTTTTTTACTTGTTACTATATTGTCAACAGGAAAGAAAAGAATAGTGTGGAAAAATGTTTCCTTTTTTTACTTGTTACTGTATTGTCCATCCCTGTTGTAAACACAATAGCTCACATTACAAAGAAATGATGCTGTGCAAAATTTTCCAAGGAACAAATTGAACTAATTCTTAATCAC…	CATAAACAACAAATGAATATGTAGTGCTTACTAAAGGCATGGGAATCATCCTGGCTAGGAGATTGCACTGTCGGCCTCCAAGTTATGACACCCTACAATAATTTAAGAAAAAAAACTTAACCCAGGACATGGACAAAATATGCTTATGAATATGATACATTAGGGTGATAGCACTCTAGGGAACAGGAAAGAAAAGAATAGTGTGGAAAAATGTTTCTTCTTTTTTACTTGTTACTGTATTGTCAACAGGAAAGAAAAGAATAGTGTGGAAAAATGTTTCATTTTTTTTTACTTGTTACTGTATTGTCCATCCCTGTTGTAAACACAATAGCTCACATTACAAAGAAATGATGCTGTGCAAAATTTTCCAAGGAACAAATTGAACTAATTCTTAATCAC…
373	Chr01	28879753	29797818	ATTTAACTCATCTTTTCATATGGACACAACACCACA	A	35	CACGGATATGTATCTTCAAAAGCGGGTGAATTTAAAAACCGACTCAAACACGGATGACGAAAAGTACCGACAAAAACATTTTTAATTTTTATAATAATAGAGATTTGGTGAAGATTGCAAATATGTGGCACATAAAAGTCACACCAACCTTTCATCCTTCGATTTTCTGTCTTTGATTGGGTTCCATATTTAGATGGCGTGATTTTGTTCAGCTTATATGCTCACTGCCGGTTGGACCGCTCATCAGATGTCGATCTGATCGTTAAGATATAGTTCTCTCCTAAATAATATCTTCTAGCCTCAACCCCTCTTCTATGTATACCCACAATGTTGCCCCTAGCCATGAATCCAACTAGAAGTATGACTTCTAAATCCTAATCATATAAGAAACCTACCAAA…	CACGGATATGTATCTTCAAAAGTGGGTGAATTTAAAAACCGACTCAAACACGGATGACGAAAAGTACCGACAAAAACATTTTTAATTTTTATAATAATAGAGATTTAGTGAAGATTGCAAATATGTGGCACATAAAAGTCACACCAACCTTTCATCCTTCGATTTTCTGTCTTTGATTGGGTTCCATATTTAGATGGCGTGATTTTGTTCAGCTTATATGCTCACTGCCGGTTGGACCGCTCGTCAGATGTCGATCTGATCGTTAAGATATAGTTCTCTCCTAAATAATATCTTCTAGCCTCAACCCCTCTTCTATGTATACCCACAATATTGCCCCTAGCCATGAATCCAACTAGAAGTATGACTTCTAAATCCTAATCATATAAGAAACCTACCAAA…
374	Chr01	28902783	29820863	G	GATAGATAGAAATATGTTACATTCTATATTAAATTTATTTTTTTATGAG	48	CCCGCCCTGGAAGCCGTCGCTTCCCCCATCCGCCCTGGAGGGCGCGGTCGCCGCCCTGGACGCCGCCGCTTCCCCCGCCCGCCCTGGAGAGCGCCACTGCCGCCGTCGCTTTCTGTCTGCGCTGCACGAGACGAAGAGAGGGGAAAGTGGAAGACGGGAAGAGCATGACGTGTGGGACCACCTAATTTTAGAATATTCATTTTATTGAGATGTTGCTGACTGGATTAATACATTGCCACGTGGATATCATATAGGACTAAAACCACCTTGTACAGCACCAAGGGGGGTTATTTATCCGGTTTAGAAAATTAAAGATGTTAAATGTCTGGTTTTGTTGTTGAGGGGGGTAATTCAGTCGACCGTCATAGTTTAGGGTAATTCGTATTTTTTCCTATTATA…	CGCCCGCCCTGGAAGCCGTCGCTTCCCCCATCCGCCCTGGAGGGCGCGGTCGCCGCCCTGGACGCCGCCGCTTCCCCCGCCCGCCCTGGAGAGCGCCACTGCCGCCGTCGCTTTCTGTCTGCGCTGCACGAGACGAAGAGAGGGGAAAGTGGAAGACGGGAAGAGCATGACGTGTGGGACCACCTAATTTTAGAATATTCATTTTATTGAGATGTTGCTGACTGGATTAATACATTGCCACGTGGATGTCATATAGGACTAAAACCACCTTGTACAGAGCCGAGGGGGTTATTTATCCAGTTTAGAAAATTAAGGGTATTAAATGTCTGGTTTTGTTGTTGAGGGGGTAATCCAGTCGACCGTCATAGTTTAGGGTAATTCGTATTTTGTCCTATTATA…
375	Chr01	28921587	29839664	G	GCTTAACTCTGGCGCAGTAACACTCTAGGTTAATGCACGGCTG	42	AGGGCGAGAGGGCGCTGGAGTCGTCTCGGCGGCGCTAGGGTTGAAGCTGGTGGGGGAAGGAGGAGGAGGGGCATGAGGATTAGCGAGCTGGGAGAGTGTGACGGGGTGCGGTCGGAAGGGGAGGAGGAGCAGCAGGTGGTGGTGGAGGAGGCCAGCGTCCGCGGCGGCGTGGTGGTAGCGCGGCTGAGCGCGAAGCGTGCGCTCGTCGGCGCCGGCGCCAGGGTGCTGTTCTACCCGACGCTGCTCTACAACGTGCTGCGCAACCGGTTCGAGGCGGAGTTCCGGTGGTGGGACCGAGTCGACCAGGTGGGTTTGCCCCCTCTTTCCTTGCGTCTGAATTCGACTCGCGTGATTAAACTCTCTACAAGCCTCGCGCGATTATAGGCTTCGCTTTTGGTT…	AGGGCGAGAGGGCGCTGGAGTCGTCTCGGCGGCGCTAGGGTTGAAGCTGGTGGGGGAAGGAGGAGGAGGGGCATGAGGATTAGCGAGCTGGGAGAGTGTGACGGGGTGCGGTCGGAAGGGGAGGAGGAGCAGCAGGTGGTGGTGGAGGAGGCCAGCGTCCGCGGCGGCGTGGTGGTAGCGCGGCTGAGCGCGAAGCGTGCGCTCGTCGGCGCCGGCGCCAGGGTGCTGTTCTACCCGACGCTGCTCTACAACGTGCTGCGCAACCGGTTCGAGGCGGAGTTCCGGTGGTGGGACCGAGTCGACCAGGTGGGTTTGCCCCCTCTTTCCTTGCGTCTGAATTCGACTCGCGTGATTAAACTCTCTACAAGCCTCGCGCGATTATAGGCTTCGCTTTTGGTT…
376	Chr01	29052299	30008008	A	ACTCAGAACAGCTCGGAAACATAGAAAAAACA	31	CATTTGTCAAATTTTTCGTTTAAGGCTGTGTTTGGTTCCTTTCAAAGTTAGAAGTTTAGATTGAAATTAGTATGATGTGACTGAAAAGTTGTGTATGACAGGTTGATGTGATGGAAAAAGTTACAAATTTGGATCTAAACACAGCCTAAAATCTACTACTCTAGTATGGTCTATAGTTTCATTTGTGTACTGGCACTCTATATCGAATTGAGTAGAGCATCAAAAATAAAAGCCAGAATCTCCTAAGAGCGATTCTAGCGGTTCTATCTAGGCCACCCCTCAATTTCGGCCTAGGAGAATCCCATGCCACACCGAATCCACAACACCTGCATGACCATTATCACATAACATAGATTAGAAGCGGTCAAACGAAGGCCGAAGGTATAGAACGTCATCGCT…	CATTTGTCAAATTTTTCGTTTAAGGCTGTGTTTAGTCCCTTTCAAAATTAGAAGTTTGAATTGAAATTAGTACGATGTGACTGAAAAGTTGTGTATAACAGATTGATGTGATGGAAAAAGTTACAAGTTTGGATCTAAACACAGCCTAAAATCTACTACTCTAGTATGGTCTATAGTTTCATTTGTGTACTGGCACGCTATATCGAATTGAGTAGAGCATCAAAAATAAAAGCCAGAATCTCCTAAGAGCGATTCTAGCGGTTCTATCTAGGCCACCCCTCAATTTCGGCCTAGGAGAATCCCATACCACACCGAATCCACAACACATACATGACCATTATCACATAACATAGGTTAGAAGCGGTCAAACGAAGGCCGAAGGTATAGAACGTCATCGCT…
377	Chr01	29085212	30033463	TGCGAGCGAGGAGGCGAGACCGGAGGCGGCGGCCGGC	T	36	TTTAAACTGTTAAACACAATTTTTTTTAAAAAATATATGTTATAGTTTCTTAAAAAATCAAACAAATCCACTTTTTAAGTTGTGCTAAGGAAGTGAACCGAGGGTGTAGGCTTAGGGTGTGTTTGGATGGAGGGATTTGGGTGGATAGGAGATGGCGCCCATTTTTTGTGGGTGTTTGGTTGATGGATAGGGATAGGATCGGGCGGCCCAACAGGGAATATTCCACTGATATGCCGGATGGAGGGATCCGGGCAGCCGCTCGAGTGCAGGGCGAGCGAGGCGAGCAGGGTCTCGTCACCCCCCACCACGCGACAACGGCGACGAGCACGGCGGCCAGTGCGAGAAGGGAGCGCGACACGCGGCGGGAAGAGGCGACGGCGGCGGCAGCGGGAAGAGGCG…	TAAACACAATTTTTTTAAAAAAATATATGTTATAGTTTCTTAAAAAATCAAACAAATCCACTTTTTAAGTTGTGCTAAGGAAGTGAACCGAGGGTGTAGGCTTAGGGTGTGTTTGGATAGAGGGATTTGGGTGGATAGGAGATGGCGGCCCATTTTTTGTGGGTGTTTGGTTGATGGATAGGGATAGGATCGGGCGGCCCAACAGGGAATATTCCACTGATATGCCGGATGGAGGGATCCGGGCAAATCGCCCGGATGCAGCCGCTCAAGTGCCGGGCGAGCGAGGCGAGCAGGGTCTCGTCACCCCCCACCACGCGACAACGGCGACGAGCACGGCGGCCAGTGCGAGAAGGGAGCGCGACACGCGGCGGGAAGAGGTGACGGCGGCGGCAGCGGGAA…
378	Chr01	29087644	30036149	TTTTTTTCTATATGCTATTAAGAAAGATGGTGTC	T	33	GTCGGCCATCCGTATCAGTATATATCACCATATGCGTAACGGCCGATCGGTTTCATTGCGCCTTTCAGTCCCATTACTGCCACTGCCACTGGTGCCGCTTCCGCTTCTGTCCGCATGTGCAGGATCTCTGTGCTGGAGCGGCGACGGTGGGAGATCTCTACAGTCCACTCTACACTTCTACAGTGGTGTGGCATGTTGGGGGGCTCACACCGTGTAGCGAAGAATTGGAGTGGAGCGCGTGCAACATGCGTTAATGCAGGCCGCCGTGGGTGGTGGTGCATGCCGACGCCAACATGAGCAGTTGAGCATTCAACTCAACTGGCTACGTGCGTTAAAAGTTTATCATCGGAGAGCGCTCTAGCTGACTGCCGAAGGGTGCCAAGGGCCACATGCGTGTAC…	TAGGGGTCGGCCATCCGTATCAGTATATATCACCATATGCGTAACGGCCGATCGGTTTCATTGCGCCTTTCAGTCCCATTACTGCCACTGCCACTGGTGCCGCTTCCGCTTCTGTCCGCATGTGCTGGAGCGGCGCCGGTGGGAGATCTCTACAGTCCACTCTACACTTCTACAGTGGTGTGGCATGTTGGGGGGCTCGCACCGTGTAGCGAAGAATTGGAGTGGAGCGCGTGCAACATGCGTTAATGCAGGCCGCCGTGGGTGGTGGTGCATGCCGACGCCAACATGAGCAGTTGAGCATTCAACTCAACTGGCAACTGGCTACGTGCGTTAAAAGTTTATCATCGGAGAGCGCTCTAGCTGACTGCCGAAGGGTGCCAAGGGCCACATGCATGTACG…
379	Chr01	29116695	30075700	GGAGCTGCGCGTGGAGCACCGCCGCGGTGGAGAGGGCGAGGAGCTTGCTC	G	49	ACCGTCGATGAAGAGGTGGGGGACGATGTTAGCTAAACTCCAGCAACTGCAGTGAAACCTGCAACACACACACGCTTGGACGCGAGAAGAACAAACCAATTGGGAAAGTCTTTTTGGCGCTGCATATTACTTGCTTGTGACATTTTCTGTTTCTTTCCCTTTTATCCATACGCGATTACAGAACGTGGGCACGATGACCCAACTTACGTGGACACGATCCTTTCTCAGCGGATGCCATCCCAAATGCTAGGATCATGGCCACGCGGCGTCTTCGACGCCTAGGCCGAGCTCCGCCGAGTCGCCGACGCTGATCTGGGGAGCGAGGCTGCCGTGTCCTCCCTTTGGATCCACGGCGACGAGAGGAGAGGGGAAAAGGGAGAAGGAGGTGCCGTCGTTTGT…	GCCGTCGATGAAGAGGTGGGGGACGATGTTAGCTAAACTCCGGCAACTGCAGTGAAACCTACAACACACACACGCTTGGACGCGAGAAGAACAAACCAATTGGGAAAGTCTTTTTGGCGCTGCATATTACTTGCTTGCGACATTTTCTGTTTCTTTCCCTTTTATCCATACGCGATTACAGAACGTGGGCACGATGACCCAACTTACGCGGACATGATCCTTTCTCAGCGGATGCCATCCTAAATGCTAGGATCATGGCCACGCGGCGTCTTCGACGCCTAGGCCGAGCTCCGCCGAGTCGCCGACGCTGATCTGGGGAGCGAGGCTGCCGTCTCTTCCCTTTGGATCCACGGCGACGAGAGGAGAGGGGAAAAGGGAGAAGGAGGTGCCGTCGTTTGT…
380	Chr01	29151267	30114164	A	ACGCGATGCGAGCAGCACCGGTCGGTCTCGCGGATTTTGTCGGTGCCGCG	49	TCCCCGTAGACTTAGTTTCTTGGAAAATGACGTATAGGCACTGACAGGAGAAAAAAAAGCTTCAGGAGCTCCTCTCGACATCCTTATAGCTCTGTACAGTCTTTTCACCTTATTTATAGGGATTGTATTTTCCTCCTATATATAACGAAATAGCACAATCTCTTTCTTTCTGATTCATTGAAGAAAAAAAAAGTAGTGGCTGCCCATCAACACGACCACGCCAGACGCAACAGATCCTTTTTAAAAAGGAACACGGCCTACCTGGGCCGCGACCGCGAGGAGGAGCAGCCGAGCAGGGAGAGCCGTGCGAGCACGCACGCACGCAGCGGGACGAGATCACGGGGAGCGCCGCAGACCGAGTGGGGCGTGTACAACAACCCCCCACCACCCCCCCGCCCC…	CCGTAGACTTAGTTTCTTGGAAAATGACGTATAGGCACTGACAGGAGAAAAAAAAGCTTCAGGAGCTCTTCTCGACATCCTTATAGCTCTGTACAGTCTTTTCGCCTTATTTATAGGGATTGTATTTTCCTCCTATATATAACGAAATAGCACAATCTCTTTCTGATTCATCGAAGAAAAAAAAAGTAGTGGCTGCCCATCAACACAACCACGCCAGACGCAACAGATCCTTTTTAAAAAGGAACACGGCCTACCTGGGCCGCGACCGCGAGGAGGAGCAGCCGAGCAGGGAGAGCCGTGCGAGCACGCACGCACGCACGCAGCGGGACGTGATCACGGGGAGCGCCGCAGACCGAGTGGGGCGTGTACAACAACCCCCCCCCCCCCCGCGCCCCCCGC…
381	Chr01	29170775	30134800	C	CTTTTAAAACGAGTTATTTATTTATAAAATTCATGTAAACCTTC	43	GCTACAAATAGGAGAAAATCGAAAAAGAAAAAGGAAAATCGAAAAAAAAGGCGTCGCGTGGAGGCTGCCAGCTGGCGCGCGCGTGCCAAATAGCAATCGCGCATTAACTTTAGGTATGAAATTTATTATGCTAACGATGCGGTAGGGTTTTCGGACCGACTACATAAGGGCTTTCGACACTCTTATACTGCCGGTTTGTTGGATGGTTTGGAAGAAGAGAAACGTGCGTGTGTTTCCAGAATCAGAGCCGAAGCTAGGGTTTTCAAAGATTTAGGTGAGTAACATCTTATTGTAACCCGTCTTTCTTTCTGAAAGTTGCTATTGTGGCAACCTCCATTCACTTCAGCAGCCTCTTGTCGAAGCCTGAATTCTGTATATGTGTATATACTCTATTCTTAA…	GCTACAAATAGGAGAAAATCGAAAAAGAAAAAGGAAAATCGAAAAAAAAGGCGTCGCGTGGAGGCTGCCAGCTGGCGCGCGCGTGCCAAATAGCAATCGCGCATTAACTTTAGGTATGAAATTTATTATGCTAACGATGCGGCAGGGTTTTCGGACCGACTACATAAGGGCTTTCGACACTCTTATACTGCCGGTTTGTTGGATGGTTTGGAAGAAGAGAAACGTGCGTGTGTTTCCAGAATCAGAGCCGAAGCTAGGGTTTTCAAAGATTTAGGTGAGTAACATCTTATTGTAACCCGTCTTTCTTTCTGAAAGTTGCTATTGTGGCAACCTCCATTCACTTCAGCAGTCTCTTGTCGAAGCCTGAATTCTGTATATGTGTATATACTCTATTCTTAA…
382	Chr01	29213226	30163774	TCCACAGAAATTTACATCAACAATTTACAGTAAAAA	T	35	ATAATGGTAGATCGAGCAAGCAAATAAAAAAGGAGATGACAGAAGTAAGGGGTAGCAACTGGTGTGACTTTTAAAAACTATATAATTAGAAACACGGGGATGAAAATGTTTAATCTTTCAAAGTTTTAAAGACAACGAGATAACTATTCAATAAATTTGAAGTAAAATCATAAAAAAAATGATTTTGTTTGGGTGCTAGCCGCGCAATTGCGCGTGCTACCCAGCTAGTTCTAAAAATTCATCAATTTTGTAGAAAGATTTGGTAGCGCTACTAGAAAAATCGTTTTTTGCCGGCGGCCAAAATGAATTTTTGCTGGCGTCCAACAGCGCCGTCAGCGACTAAAGGCCAGTGATTGGCGGTAGCTGAATTTTCACGGGCGGTACACTATATCAGCCGCC…	AAATAATGGTAGATCGAGCAAGCAAATAAAGAAGGAGATGACAAAAGTAAGGGGTAGCAACTGGTGTGACTTTTAAAAACTATATAATTAGAAACAAGGGGATGAAAATGTTTAATCTTTCAAAGTCTTAAAGACAATGAGATAACTATTTAATAAATTTGAAGTAAAATCATAAAAAAATGATTTTGTTTGGGTGCTAGCCGCGCAATTGCGCGGGCTACCCAGCTAGTTCTAAAAATTCATCAATTTTGTAGAAAGATTTGGTAGTGCAACTGGAAAAATCGTTTTTTGCTGGCGGCCAAAATGAATTTTTGCTGGCGTCCAACAGCGCCGCCAGCGACTAAAGGCCAGTGATTGGCGGTAGCTGAATTTTCACGGGCGGTACACTATATCAGCCGC…
383	Chr01	29293250	30230402	GACGTCTTTCAAGCTATATTTATAGTAATTA	G	30	TGAGTTATAAACCTCTCGTTATAACCTCATATTCTTTTATTTCTGTATTACAACTTATTGTATTTATATAGGTCGATTATATAAAACATTTCTATTATATATTATTAGAAAAAAATAGCGGATTGTCATGTGTAACTTTACACGAGGCTAGCTAAAAGTATAATTGGATTTGGTTTACAATTCTTCACTTTTGATTACATAAATATAATTGTAATTCATATACAATAGATTTCAAAAGCCAAATATATTTTATATACAACTCTTAGCATATATATTTTTTATAGATATAATTATACTTTCAAAACAATAGATTTTTTTTAAAGTATGATTGGATTCACATACATCTCTTAGATTTTGTTTTCATAAATGCAACCACATTTTCTATAAAACTATATTAAT…	TGAGTTATAAACCTCTCGTTATAACCTCATATTCTTTTATTTCTGTATTACAACTTATTGTATTTATATAGGTCGATTATATAAAACATTTCTATTATATATTATTAGAAAAAAATAGCGGATTGTCATGTGTAACTTTACACGAGGCTAGCTAAAAGTATAATTGGATTTGGTTTACAATTCTTCACTTTTGATTACATAAATATAATTGTAATTCATATACAATAGATTTCAAAAGCCAAATATATTTTATATACAACTCTTAGCATATATATTTTTTATAGATATAATTATACTTTCAAAACAATAGATTTTTTTTAAAGTATGATTGGATTCACATACATCTCTTAGATTTTGTTTTCATAAATGCAACCACATTTTCTATAAAACTATATTAAT…
384	Chr01	29304606	30238467	AGTTAGGGGATGCGTTGTATCCGGTGTCGTGGA	A	32	CAAGGACTACTTCCTCCCCATCCTCCCACGCGTCCCCATGCCGTGCCATGATTTTGACACACCACTTGTGTCGTTCCTATGTGAGCGATGGTGGCAGCGAGTGTCGACCTTGCCATCGGGGGTGGAGAGAAGCTCGCCTCCACCATACATACACGTCAGGAGTGTGGAGGAGCAAGAGAGGGGGCGATGGGGAAGAGATTGGAGAGGGGGAAAGAGGAGGAAGACCAACAACAGAGGAGAGAGAGGAAAGAGAAAAAAAATGGCAGGTGTGAGGATGACACGTGGGGCCCACATGGGTCCCACCATTTTTTTTATTGTTATGTGGTGTAACTGACACGTGGGCCCTATAGTTTTATTATTTTTCCAGACCAAATTGTCACGTAAGCGCCATGTTAACAC…	GCAAGGACTACTTCCTCCCCATCCTCCCACGCATCCCCATGCCGTGCCATGATTTTGACACACCACTTGTGTCGTTCCTATGTGAGCGACGGTGGCAGCGAGTGTCGACCTCGCCATCGGGGGTGGAGAGAAGCTCGCCTCCACCATACATACACGTCAGGAGTGTGGAGGAGCAAGAGAGGGGGTGATGGGGAAGAGATTGGAGAGGGGGAAAGAGGAGGAAGATCAACAACAGAGGAGAGAGAGGAAAGAGAAAAAAAATGGCAGGTGTGAGGATGACACGTGGGGCCCACATGGGTCCCACCATTTTTTTATTGTTATGTGGTGTAACCGACACGTGGGCCCTATAGTTTTATTATTTTTCCAAACCAAATTGTCACGTAAGCGCCATGTTAACAC…
385	Chr01	29305007	30238836	A	ATGCACGATGAGCTGCAGAGAGATCTGGAGATGCTCCACT	39	CATAGGATAAAGATCTAGTCAAACGAATCACGTGGGTACCACATCAGCCAAAATCATCATCGAAACCACCCTAGGACCTCGTGTTCACTTGTTTTGTAAGTTAGGGGATGCGTTGTATCCGGTGTCGTGGAGATGTTTTTGAAACTCGATGACAACACAAGGGACTAAAAATGAACTTTATCCAAAACCGAATCCCTTCGCCTGCGTTCGGACGCTCTAATGGGCCAAGGGGCACTGCAGGCCGCGGGGCTCGTCCTTCCGTTCGTCGGAGGCCGAATTGCAACCGCTGATGCTAAACAACCCATGAAAAAATGCAAATCATCTCGAGCCGTCCGTCGGATCGAAGTTGAATCCTGTAGATGTATCTGTTCTGTTCAGGTGACCCTAGATGCCTAGTCA…	CAAATTGTCACGTAAGCGCCATGTTAACACCACATAGGATAAAGATCTAGTCAAACGAGTCACGTGGGCACCACATCAGCCAAAATCATCATCGAAACCACCCTAGGACCTCGTGTTCACTTGTTTTGTAAGATGTTTTTGAAACTCGATGACAACACAAGGGACTAAAAATGAACTTTATCCGAAACCGAATCCCTTCGCCTGCGTTCGGACGCTCTAATGGGCCAAGGGGCACTGCAGGCCGCGGTGCTCGTCCTTCCGTTCGTCGGAGGCCGAATTGCAACCGCTGATGCTAAACAACCCATGAAAATATGCAAATCATCTCGAGCCGTCCGTCGGATCGAAGTTGAATCCTGTAGATGTATCTGTTCTGTTCAGGTGACCCTAGATGCCTAGTCA…
386	Chr01	29350217	30287084	AGATAATGGAATAAAACAACTACAAATAATCTTATA	A	35	TTGCGGTTGATTAATCGCATGGCCAGTGTGAACTGGCTGACCCGCCGGAAGAACTAAACAAGCAGATCAGAGCAAGTATAATAGTAGGCTATAAGCCGGCTAAATGCTGAGGTGGAGGAGAAAAGAGAGGAGAGAGAGAAGAAGCGGGCTGTAAACTTACAGCCGCCTTAGACACAAGAACTAAGAAACTCTGTAAGAGAGACGAGTGTGTCATATATTAATTGTAAAGAGCTAACTATTACTCTCTCTATCCATAAAAGTTGCACATATTACTTTTGACACCAAGATCAGAAAAAAATTAAATCACCTTAAATGTTACAAAATCAAGGAGTGAATACAAGCATGCAACCAATAAACATTTAGATGACTCCTTAGGTTCTAATAAAACATTTAATTTAT…	TTGCGGTTGATTAATCGCATGGCCAGTGTGAACTGGCTGACCCGCCGGAAGAACTAAACAAGCAGATCAGAGCAAGTATAATAGTAGGCTATAAGCCGGCTAAATGCTGAGGTGGAGGAGAAAAGAGAGGAGAGAGAGAAGAAGCGGACTGTAAACTTACAGCCGTCTTAGACACAAGAACCAAGAAACTCTGTAAGAGAGACGAGTGGGTCATATATTAATTGTAAAGAGCTAACTATTACTCTCTCCATCCACAAAAGTTGCACATATTACTTTTGACACCAAGATCAGAAAGAAATTAAATCACCTTAAATGTTACAAAATCAAGGAGTGAATACAAGCATGCAACCAATAAACATTTAGATGACTCATTAGGTTCTAATAAAACATTTAATTTAT…
387	Chr01	29350663	30287471	C	CCCCTTCTCCTTTCCCCCTTTGAAATAAGTT	30	TTATTTGGAAAAACTAAAATGTGTAATATGTGTAACTTTTGTGGATTTCTTTTAGATAATGGAATAAAACAACTACAAATAATCTTATAGCCAACAGATCGGTTATATTATTAGCCTCTCTCTCAGTATGCTTTACGGACTTGATGACACCACATGGCGCCCCACCTTAACTAGTCCTGAGCCCTGAATTTAATTGTCGCCCCCATGCATCATGCATCATCACATGAGAGTAACTAATGATCCTGATTAGTTTATGAACAGTAACATGTGAGGAGAAAAGATGCATGGCCCTCGCATCCATCCGATCGGCCACTAATTAAACAAGCACTGGATCCCCCAACTACGTACAGCTACTGCACGCTGCGCGACGATCCACCGGTGCAGACAAGTCAAACAAGG…	CATTTAATTTATCTCTTCATTTAAGTCTTGAATGCATAAAGACTACAAGGAGAAACAACTTATTTGGAAAAACTAAAATGTGTAATATGTGTAACTTTTGTGGATTTCTTTTAGCCTCGCTCTCAGTATGCTTTACGGACTTGATGACACCACATGGCGCCCCACCTTAACTAGTCCTGAGCCCTGAATTTAATTGTCGCCCCCATGCATCATGCATCATCACATGAGAGTAACTAATGATCCTGATTAGTTTATGAACAGTAACATGTGAGGAGAAAAGATGCATGGCCCTCGCATCCATCCGATCGGCCACTAATTAAACAAGCACTGGATCCCCCAACTACGTACAGCTACTGCACGCTGCGCGACGATCCACCGGTGCAGACAAGTCAAACAAGG…
388	Chr01	29366938	30303782	T	TTCTTCCGGTGTTCCAGCATTACTTGCCCTGGTT	33	ATGAACAGCCAAGGCTCCAAATGGAACAAACATAACAGCAACAGTAACCAGGCTTCTGTGACTATAAATACGAACAAAAAAAAAATCTTTGCTTCGACGCAACTAATTGGCCCACCCTCGTCCTTCCAGACTGGACGCCACCTCACATGTCTCCTTTCACCCATCCCCAACCGCGTGCAGCGCATCCACTCTATTTACGTAACCACCAGATCCAATGTTACTCAATACCCATCTAGTCCATTCCTAATTATATGGGCCTAACCCATTATGACGTATGAGCATGTTACTATGACATTAAGCGATACAGGCAGCATCCAAAACTTGACCTGAATAAGAGAGTCCTCAAATAATCCGAACACTAGGGAGTTTCACCCGTCGTCTTCATCTTTCTCAGCTCCC…	AGCCAAGGCTCCAAATGGAGCAAACATAACAGCAACAGTAACCAGGCTTCTGTGACTATAAATACGAACAAAAAAAAAAAAATCTTTGCTTCGACGCAACTAATTGGCCCACCCTCGTCCTTCCAGACTGGACGCCACCTCACATGTCTCCTTTCACCCATCCCCAACCGCGTGCAGCGCATCCACTCTATTTACGTAACCACCACCAGATCCAATGTTACTCAATACCCATCTAGTCCATTCCTAATTATATGGGCCTAACCCATTATGACGTATGAGCATGTTACTATGACATTAAGCGATGCAGGCAGCATCCAAAACTTGACCTGAATAAGAGAGTCCTCAAATAATCCGAACACTAGGGAGTTTCACCCGTCGTCTTCATCTTTCTCAGCTCCC…
389	Chr01	29375096	30311970	T	TTTCCACGCGTACGCTTTTTAAACTAATAAACGGT	34	ACGACGTCCGGCTCGGCGGGTGAACCGCGCCGCGCATCTGCTTCCAGGAGAACCTGGTCCTCTGGAGTCGGGACGGGGAGGCGTCGCGCAAGAGCACGAGTGGCATGAGGAGATCTGGCCGCCGGGGCACTGGGAAAACAGTGTGTTGACATTCGCAAGCCGCAAAAGGGAGGACGAGATCGGTGGAGCGGTGGGCTGGAAAGCCTGGAAGGATAGTGAATGGGCTTACATGAGGGTATGGAATTGGCCCAAGGGGACGACACATTATGTTGCTCCAGTGGGTTGGGCTGTCATTTCCGGCCTTCATAGATCAAGACCCACATGGGCCTTCGATTTATCATTTTGGTTTTTGCTACATGTCACTCATGTATTTTTTTTTTCACTCAAATTTCCGCCCGA…	GTCCGGCTCGGCGGGTGAACCGCGCCGCTCATCTGCTTCCAGGAGAACCTGGTCCTCTGGAGTCGGGACGGGGAGGCGTCGCGCAAGAGCACGAGTGGCATGAGGAGATCTGGCCGCCGGGGCACTGGGAAAACAGTGTGTTGACATTCGCAAGCCGCAAAAGGGAGGACGAGATCGGTGGAGCGGTGGGCTGGAAAGCCTGGAAGGATAGTGAATGGGCTTACATGAGGGTATGGAATTGGCCCAAGGGGACGACACATTATGTTGCTCCAGTGGGTTGGGCTGTCATTTCCGGCCTTCATAGATCAAGACCCACATGGGCCTTCGATTTATCATTTTGGTTTTTGCTACATGTCACTCATGTATTTTTTTTTTCACTCAAATTTCCGCCCGACACTC…
390	Chr01	29395185	30332245	GTGGATATGTATCGAAGAATTGTGGAACTAATA	G	32	GACACTCATCATCTCTGATTTGTTGGATGTTGCCACTTCCTACTGTAAGGTATATATGCACATATCCTCCATGTGAAGAAAGAGCTATTAGATTCTACTTTCTCTAACATCAGGTAGAACAAGGAATCCTTATCGTAAAAAGAATGAAAGTAAAAAAAAAGAACGAAAGTAACAGTCAAATTTGGATTGCATGGCTAGAATTTCATGTGCTAGGAAGAATATGTATGATTGTACCAGAAACTTGTGTACATGGCCTAAAAGATAAGCTGCCACATACTACCTCCGTCCCGAAATAAGTTAATCTAGTACGGGATGTGCATGTCCAGATTTGTAGTACTAGAAAATGCCATATCCCATACTAGATTAACTTATTTTGGGACGGATGTAGTATGCTTATGA…	ACACTCATCATCTCTGATGTGTTGGATGTTGCCACTTCCTACTGTAAGGTATATATGCACATATCCTCCATGTGAAGAAAGAGCTATTAGATTCTACTTTCTCTAACATCAGGTAGAACAAGGAATCCTTATCGTAAAAAGAATGAAAGTAAAAAAAAAAAGAACGAAAGTAACAGTCGAATTTGGATTGCATGGCTAGAATTTCATGTGCTAGGAAGAATATGTATGATTGTACCAGAAACTTGTGTAGATGGCCTAAAAGATAAGCTGTCACATACTACCTCCGTCCCGAAATAAGTTAATCTAGTATGGGATGTGCCTGTCCAGATTTGTAGTACTAGAAAATGCCATATCTCATATAGATTAACTTATTTTGGGACGGATGTAGTATGCTTATGA…
391	Chr01	29406659	30343659	CAGCATCTTGACTATTCACGGTTGTTAGGAATTAAG	C	35	GAGCATCGATCTCCAGATTTGTTCTGCCATTTATAGCGTGGACCGAGAAATGCATCACTATCTTTTGTACGTTTGTGCTTGTGTCAGCAAGCCTAGTAGTAGATCATAAACAAGCTGTTGATGTTGTCTCCCGTTCATTTGGAAGCCTGTACGGCTGTACCTGTCTGTTGCGATGCATTCGTCCTGGAAGAGAACAAAGTAAGAAGTGGTCGCCATCGACGTAAATACGAGGACGCATGCTCCTTCCTGAATTCTGATGCGGCTTCTACTTCTGCCATTGCAATAATCTTTTTGGTATTATGGTATATGATTCGGTGGATATCAGGGCAGCTTCCAAGTGGAACGAATGGAAGCTATTAAAATCGACTTCTTTTCCATTTTCCTCCCGTTTGGATTTTT…	AGCATCGATCTCCAGATTTGTTCTGCCATTTATAGCGTGGACCGAGAAATGCATCACTATCTTTTGTACGTTTGTGCTTGTGTCAGCAAGCCTAGTAGTAGATCATAAACAAGCTGTTGATGTTGTCTCCCGTTCATTTGGAAGCCTGTACGGCTGTACCTGTCTGTTGCGATGCATTCGTCCTGGAAGAGAACAAAGTAAGAAGTGGTCGCCATCGACGTAAATACGAGGACGCATGCTCCTTCCTGAATTCTGATGCGGCTTCTACTTCTGCCATTGCAATAATCTTTTTGGTATTATGGTATATGATTCGGTGGATATCAGGGCAGCTTCCAAGTGGAACGAATGGAAGCTATTAAAATCGACTTCTTTTCCATTTTCCTCCCGTTTGGATTTTTT…
392	Chr01	29446362	30384673	TGCCTGGCATAGGCGATGACAATAGGAGTTGTT	T	32	TCATTAGTCTAAGTGATGAGAGCGGTTAAAAACATGGTAAAATTATTTTCTAAAACGATATATATTATCAGCTCAAAAAAAGTATATGTTTTGACGAACTAGTACTAAGTGTGCCGATATCATTGAATAAAACATGAGTAAATAGTTTGTACAAGTAAAAGCGAGAAATTGTAAAAAGAAAAGTAAAATCAGGGGATGAGCTATAAAGCGGTGTTGGCTTCCTCCTTAATTTTTGCCACCACCGCTATTGTAGAGTGATCTTTATGCTCGAAGACTCTTTGGTTACTTTCCTTCACACCTATCAAGCCATGAGGAGGATAAACGAGCAAACTCCATTCTTTGGTATAGATCTTTGGCAATTGCTAGCGCTATCCACTAGGTGTATACCGACGTAGACAC…	AACACCAACCGGGACTAAAGATAAAGTATCTTTAGTCCCGGTTGGTGTTACCAACCGGGACTAGAGATCAATTTTTACTCCCGGTTATTTCACCCGGGACTAAAGATAGCGATCTTTAGTCCCGGATTCGTAGTCCCGGTTGAAAAACCGGGACTAAAGGGGGGTTACGAACCGGGAGTAAAAACCACTTCTCCACCAGTGTATAAAGCGGTGTTGGCTTCCTCCTTAATTTTTGCCACCACCGCTATTGTAGAGTGATCTTTATGCTCGAAGACTCTTTGGTTACTTTCCTTCACACCTATCAAGCCATGAGGAGGATAAACGAGCAAACTCCATTCTTTGGTATAGATCTTTGGCAATTGCTAGTGCTATCCACTAGGTGTATACCGACGTAGACAC…
393	Chr01	29471570	30413641	C	CGGGCGGGGAGGCCGGATCCGCCGCCGCTAGGCCACGGGG	39	CATCGCACACTACTAGAAAAATGATTTTTTATGGCGTTTGGAAAATATTTTTCATGGCGGCTATAAGAAAAAACAGCCAGTGTAGAAAATCGGGGGGGGGGGGGGGGCGCCAGTGAAAACTGATTTTCGCTGGCGGCCATATTAAGAGGTCCGCCATAAAAAATACTATATTATTTTGAGGCGGACCTCTTAAATGTTCGCCAGCAAAAATCAGCGTTTTCGCTAGCGGCTACTATAGAGATCCGCCAGCGAAAAAACGGATCCGCCAGCGAAAAGCACAGCTCACAAATCGATTCCTTCACAGCATCACCCACCCACGCATTTAAAAGCAATTTCACCCACCCACCCACCCACTGCATCCATCTCTCCTCTCTATCTCTTTCTCATCTCCACCTCACC…	TCGGCAAAGGCGCCATCGCACACTACTAGAAAAACGATTTTTTATGGCGTTTGGAAAATATTTTTCATGGCGGCTATAAGAAAAAACAGCCAGTGTAGAAAATCGGGGGGGGGGGGGGGTCACGGGCCGCCAGTGAAAATTGATTTTCACTGGCGGCCATACTAAGAGGTCCGCCATAAAAAATACTATATTTTTTTGAGGCGGACCTCTTAAATGTTCGCCAGCAAAAATCAGCGTTTTCGCTGGCGGCTACTATAGAGATCCGCCAGCGAAAAGCACAGCTCACAAATCGATTCCTTCACAGCATCACCCACCCACGCATTTAAAAGCAATTTCACCCACCCACCCACCCACTGCATTCATCTCTCCTCTCTATCTCTTTCTCATCTCCACCTCACC…
394	Chr01	29550175	30475377	G	GTTCACCGGGCAACACCTCCACAAGCTGTCTA	31	TGTAGGATCAAGAAGGCCGACTAGAGGGGGGTGAATAGGCGGTTTTTCAAACTTTTGGCTAAAACCGAGTTTTGTATGCGGAAGCGTAAATCAAAATGGTTTTGCACAATTCGAAACCTAAATCAACTAGTCTCAAGTAAGTGCACAAAGAAGCTAGCCTATGTTGAGGTTTGCAAGCCTAGGGTGATAATAGCACAAAGTATGTAAACTTGCTCAAAGTAAATTTGCACAAAAAAAGGAGACAAGAGACAAGGAATTTTCACCGAGGTTCGGAAACTCGCCGGTTTCCTAATCCCCGTTGAGGCGAGCCCAACTCCACCGCTCAACCACGAAACCACCGCACGCCCCCTTCGTCAAGGGGTGGGCAAGGCGGGAGCCGGCCCACGGAGAGAACTACCA…	AGAAGGCCGACTAGAGGGGGGTAAATAGGCGGTTTTTCAAACTTTTGGCTAAAACCAAGTTTTGTATGCAGAAGCGTAAATCAAAATGGTTTTGCACAATTCAAAACCTAAATCAACTAGTCTCAAGTAAATGCACAAAGAAGCTAGCCTATGTTGAGGTTTGCAAGCCTAGGGTGATAATAGCACAAATAAACTCTAGTATGTAAACTTGCTCAAAGTAAATTTGCACAAAATAAAGGAGACAAGAGACAAGGAATTTTCACCGAGGTTCGGAAACTCGCCGGTTTCCTAATCCCCGTTGAGGCGAGCCCAACTCCACCGCTCAACCACGAAGCCACCGCACGCCCCCTTCGTCAAGGGGTGGGCAAGGCGGGAGCCGGCCCACGGAAAGGACTACCA…
395	Chr01	29566454	30490944	T	TCCCGAAAGAAAGGGAGACTTTTTTGGTTCGAGCGGCGTTG	40	AATGAAACATAACTATAGATTATCAAAACAACAATGTGTTTTATAGTCTATCTATTTGACAGAAGTAGCAAGTTTCCTTGGTATGGGACATTTTACTTCAATACGTGGGCTGTAGGGTTTTCGAATGAGAGCTCAAGAGTAGGATATTAAATAATGCTAATTAGTGCCTCACTTTTTTTTTCCCTCTGTGCTGTGAGCTCAGCTGCCAGATTTTTAATGTTATATGCCTACGTTCTTGCAGATATTCCATTTTATGATTGGCCTATGCAACTTAGGTGAGATCTGTATTGCTATGATAATACCTTTTTCCCTTTATTTTGCTTGAGGTTTCTTTATTATTTTTTGTGCACTGGAAATTTCTGCATAATGTAGTCAGTAGTTAATGACTGTCTTAATTGT…	CTATAGATTATCAAAACAACAATGTGTTTTATAGTCTATCTATTTGACAGAAGTAGCAAGTTTCCTTGGTATGGGACATTTTACTTCAATACGTGGGCTGTAGGGTTTTCGAATGAGAGCTCAAGAGTAGGATATTAAATAATGCTAATTAGTGCCTCACTTTTTTTTTCCCTTTGTGCTGTGAGCTCAGCTGCCAGATTTTTAATGTTATATGCCTACGTTCTTGCAGATATTCCATTTTATGATTGGCCTATGCAACTTAGGTGAGATCTGTATTGCTATGATAATACCTTTTTCCCTTTATTTTGCTTGAGGTTTCTTTATTATTTTTTGTGCACTGGAAATTTCTGCATAATGTAGTCAGTAGTTAATGACTGTCTTAATTGTTCTGAATGGTTC…
396	Chr01	29576720	30501245	T	TTGTTTTCATTATTTTTGTCATGATGGAAATGGAAAAGCT	39	GCGACGATGGCGAAGAGAAACTGTACAGCAAATCGACCAGCTTACTAGAGGCTCGTCTCCAGCGTACAGAAGAGATAGGCCCAAAACTATTTTGGGCTGTTCCCGTACCGTACTGAGCTTAAAAGGGCGCGGCCGCTACAGTGTTCGGAGATTTGGCCCTACGTAGAGCTTGGACGATCGTTCTTAATTACTTCTTCTTAGCCTTCGAATTTCCACATTTCCTCCCATTTTTTTTTATCTTGGTTTTGTTTGTCTCTTTCAAGGCATTACTAAGTATAAGATGAATATTTATTTTTCTCTGCATCTTCAACTACGACTCCGTGGCCCAATGGATAAGGCGCTGGTCTACGGAACCAGAGATTCTGGGTTCGATCCCCAGCGGAGTCGTTTTGTTATTTC…	AGCGACGATGGCGAAGAGAAACTGTACAGCAAATCGACCAGCTTACTAGAGGCTCGTCTCCAGCGTACAGAAGAGATAGGCCCAAAACTATTTTGGGCTGTTCCCGTACCGTACTGAGCTTAAAAGGGCGCGGTCGCTACAGTGTTCGGAGATTTGGCCCTACGTAGAGCTTGGACGATCGTTCTTAATTACTTCTTCTTAGCCTTCGAATTTCCACATTTCCTCCCATTTTTTTTTATATTGGTTTTGTTTGTCTCTTTCAAGGCATTGTTGAGTATAAGATGAATATTTATTTTTCTCTGCATCTTCAACTACGACTCCGTGGCCCAATGGATAAGGCGCTGGTCTACGGAACCAGAGATTCTGGGTTCGATCCCCAGCGGAGTCGTTTTGTTATTT…
397	Chr01	29710118	30632668	A	ATATATATATATATATATATATATATATATATATC	34	TGAAAAAATTTGGAACTAAACTCGGCCTTAGTTGGAAAAGAAAATTTTTGGGTGTCACATCGGACGTTTAACCAAATGTCGGAAGGTTTTTCGGATACGAATGAAAAAAATAATTTCATAACTCGCCTGGAAACTGCTTGACGAATTTATTCAGCATAATTAATCCGTCATTAGCACATGTGGGTTATTGTAGCACTTATCGCTAATCATGGACTAATTAGGCTTAAAAGATTTGTCTCGCGATTTCTCCCCTAACTGTGCAATTAGTTTTTCATCTTATCTATTTAATGTTCTATGTATGTGTCTAAAGATTCGATGTGATGTTTTTAAAAAAAAATTTGGGAACTAAACAAGACATAAGGGTATAATCATTGTTTTCTCTGCAAATTTTTACAATCG…	GAAAAAATTTGGAACTAAACTCGGCCTTAGTTGGAAAAGAAAATTTTTGGGTGTCACATCGGATGTTTAACCAAATGTCGGAAGGTTTTTCGGATATGAATGAAAAAAATAATTTCATAACTCGCCTGGAAACTGCTTGACGAATTTATTCAGCCTAATTAATCCGTCATTAGCACATGTGGGTTATTATAGCACTTATCGTTAATCATGGACTAATTAGACTCAAAAGATTCGTCTCGCGATTTCTCCCCTAACTATGCAATTAGTTTTTCATCTTATCTATATTTAATGTTCTATGTATGTGTCTAAAGATTCGATGTGATGTTTTTAAAAAAAAAATTGGGAACTAAACAAGACATAAGGGTATAATCATTGTTTTCTCTGCAAATGTTTACAATC…
398	Chr01	29724552	30647136	A	AGAGCCGCCGCCACTGCCGCCCGAGAATCATCGGTG	35	CATACAAGCATTTTGAACATGAAAAAAAGAAAAAGAAAAACAGCAACAACAGAAGAGAGGAAGGAGGCCGTCGTCGCCGTCACCGACCGAGCAGCACCGGTTGTGCGAGCCCCGTCGCCGAGCATCACCGCCGCTGAGCTCTTCTGCTGTACCAAGCCCCGATCTAGGAAGCCGGGCTCACCAGCGAAACCGTGGGAGGGGGAAGGGTTGGGGGAGGGGGAGGAGGAGGAGCTCGCCATGCCCTCTGTCACCGTTGTCGTCCCGTCGCCGTGCCCCCGCTTCCCATCGCAGTCGTCACCGCGCCCCCCGTCGTCGTCGCGCCCCAAAACAGCTCCTCCCGTCGCCGTCACTGCACCCCCACCTCCCGTTGCAGTCGCCGTCGCGCCCCACGACTCCTCC…	CATGGAAGTGAACACATCATACAAGCATTTTGAACATGAAAAAGAGAAAAAGAAAAACAGCATCAACAGAAGAGAGGAAGGAGGCCGTCGTCGCCGTCGCCGACCGAGCAGCACCGGTTGTGCGAGCCCCGTCGCCGAGCATCACTGCCGCTAAGCTCTTCTGCTGTACCAAGCCCCGATCTAGGAAGCCGGGCTCACCAGCGAGACCGTGGGAGGGGGAAGGGTTGGGGGAGGGGGAGGAGGAGGAGCTCGCCGCGCCCTCTGTCACCGTTGTCGTCCTGTCGCCGTGCCCCCGCTTCCCATCGCAGTCGTCGCCGCGCCCCCCAAAACAGCTCCTCCCGTCGCCGTCACTGCACCCCCGCCTCCGTTGCAGTCGCCGTCGCGCCCCACGACTCCTCC…
399	Chr01	29729591	30652198	A	ATTATCCATCTTTTCTGGCGGCGCATCTAAGTGACCGCCAGCGAAAA	46	GGATTTATCTCACACCTCGTTGGCTGTCGCAGCTCCGTCGCCGGTGAATCGACAGCGCCGCTGCCGCCGCCGCAGGAGTGAGACCAGGTCGACTGAAAACGAGAGAAGAGAGGGATCTGTGGTGAGGCTGTGTTATGAGTGAGAGGGGCAGGGGTAAGATGGACATTTCACGCTCTCAGTGCCACCTTGGTTGGTGATGTGGCAGCCGTGGGACCTAAAATTGGGTGTAAAATGGCAGAGGAGAGCTGGTTTGTGGGGACCTGGGGTAAATTGTCTAAGTTATTTGGGAAGATGGCATTTGGGAATGCTACATCTAAGTGAATGGCAAATAGTCCAAAATCCCGAGGTGGGTGGATAAGGACACATGGGTGGTGCTAAAATATGGAGGTTGTTCTACCA…	AACGGATTTATCTCACACCTCGTTGGCTGTCGCAGCTCCGTCGCCGGTGAATCGACAGCGCCGCCGCCGCCGTAGGAGTGAGACCGGGTCGACTGAAAACGAGAGAAGAGAGGGATCTGTGGTGAGGCTGTGTTATGAGTGAGAGGGGCAGGGGTAAGATGGACATTTCACGCTCTCAGTGCCACCTTGGTTGGTGATGTGGCAGCCGTGGGACCTAAAATTGGGTGTAAAATGGCAGAGGAGAGCTGGTTTGTGGGGACCTGGGGCAAATTGTCTGAGTTATTTGTGAAGATGGCATTTGGGAATGCTACATCTAAGTGAATGGCAAATAGTCCAAAATCCCGAGGTGGGTGGATAACGACACATGGGTGGTGCTAAAATATGGAGGTTGTTCTACCA…
400	Chr01	29732700	30655554	ATTCTCCCCCTCCCCCCCCCCCCCCCCCCCCTTTTGT	A	36	TTGCCGACAACGGTGTATTGAAGATCTTTTCAGCAGATTGAGTAGCGCCATTTTTATTTTTATTTTTACCGTCAGAAAACAACCTTCTTCTATTAGGTGTTGTGGTGTAATATGCCTCTTATACTCACCGATAATGACCCAAAAACTTTATTTCCTTTCATCCATCAAATCTAACATAAAGGAGAGTCCAACGTTGGACGTAACGCACGAGGCAGGTTGCTTGGGCGTTGGCTTCCACAATGCATCAGGAGGGGGCAATGGGAGTATTCCGTTGAGAAATGTGGACAGATTTGAGATCAGATCATGCACGCAGCATCAGTTGCTGCAGGTTGTAACTCAAGCAGATTCGACTTTCGATCCACGAGAAGATTGCCAGCGTACGGTATGATTAAGTATAGC…	GGACGTAACGTACGAGGCAGGTTGCTTGGGCGTTGGCTTCCACAATGCATCAGGAGGGGGCAATGGGAGTATTCCGTTGAGAAATGTGGACAGATTTGAGATCAGATCATGCACGCAGCATCAGTTGCTGCAGGTTGTGGTCCCCATCGTTTGGCTTATTTCCTAATAAGCCAAAACGGCTTATTAGGAAATAAAAATGAATTTGTGGGTAAAACTTTTATAAATGTGTTCTTTGTGACTTAAAAGCCAATGTTGAAAAAGAAACTACGTTGAAAATATCTCAAAATCAATCTCAAAATTAAGCTTGGAAATTCAAAATTTGGCTTTTTCTTTGGCTTATTAGGCCATCCGATGGGAGCCTGTAACTCAAGCAGATTCGACTTTCGATCCACGAGAAGA…
401	Chr01	29749726	30672532	GACGATAGATGTGTCTGATCATCGCAAATGGGAGG	G	34	GAGACCGGGGGTAAGGCTTTCGCCCATAGCTCCGTCAACCATCAATCACATGTGCAAAAACGGACATGAAGGTGTTATGGGTTATTATTGTTCGGCTAGCCACACCCGACACAAAAGCTCCGATTCCGCCACAGTAAACACAACCACGCCACAAAAGAAAACGATACTACACAAAGATCCTTTTTTTCCTCCTTTTGGAGGGTACAGTCGTTTCAAGATCTATCAATTCAAAACCAATAAATTAATTAAAGGTATGACCCCCTTAATCCATACACAGTTAATATATATATGTACCTGCACGGCGAGAGGAAACCCTTCATTAATTCGTGCCATGCATATGCTGATATGCAACTAACCACGTTTATCTGGTTTCATTCAGTATAGGCATGTCCTCATCAA…	GTCAGATACCGGGGGCAAGGCTTTCGCCCATAGCTCCGTCAACCATCAATCACATGTGCAAAAACGGACATGAAGGTGTTATAGGTTATTATTGTTCGGCTAGCCACACCCGACACAAAAGCTCCGATTCCGCCACAGTAAACACAACCACGCCACAAAAGAAAACGATACTACACAAAGATCCTTTTTTTCCTCCTTTTGGAGGGTACAGTCGTTTCAAGATCTATCAATTCAAAACCAATAAATTAATTAAAGGTATGACCCCCTTAATCCATACACAGTTAATATATATATGTGCACGGCGAGAGGAAACCCTTCATTAATTCGTGCCATGCATATGCTGATATGCAACTAACCACGTTTATCTGGTTTCATTCAGTATAGGCATGTCCTCATCAA…
402	Chr01	29786387	30709100	T	TAAATATGACTTTGTCCGAATTCGTTATAATGGAAT	35	GAGCTTTATAGCGCACGCGAGGTGGGACGGGACGACGTCGTGGCACGGTACCATCTCTACAGGGAGCCGACTGCCGAGTGACCGGGCCGGTCTCGCACCTAAGCGGCATGTGGGGCGGACGCCACTCGCGAGCATTGATGGGTTAGTGCTGCCGCTTTGCCCCGATCGAATTGTGGATTGCTTTTCGCGCGAGCAAACCCTCGATATAATCATTTCACCCAGTGCTCCAGCTGTCACCATGAACAATCAAATTAGCATATACTGGCTCCTTAAAAAAGTCCAACATATATAGTATTGGATTAGACTTAGGCCGAGTTTAGTTACAGACTTTTTCTTTAAACTTTCAACTTTTCTATCACATCAAAACTTTTCTACACACACAAACAAACTTTCCTACAC…	AGCTTTATAGCGCACGCGAGGTGGGACGGGACGACGTCGTGGCACGGTACCATCTCTACAGGGAGCCGACTGCCGAGTGACCGGGCCGGTCTCGCACCTAAGCGGCATGTGGGGCGGACGCCACTCGCGAGCATTGATGGGTTAGTGCTGCCGCTTTGCCCCGATCGAATTGTGGATTGCTTTTCGCGCGAGCAAACCCTCGATATAATCATTTCACCCAGTGCTCCAGCTGTCACCATGAACAATCAAATTAGCATATACTGGCTCCTTAAAAAAGTCCAACATATATAGTATTGGATTAGACTTAGGTCGAGTTTAGTTACAAACTTTTTTTTTTAAACTTTCAACTTTTCTATCACAATAAAACTTTTCTACACACACAAACAAACTTTCCTACAC…
403	Chr01	29789485	30712238	C	CCAACGAGTTATGAAAATAGTTTTTTCATTCGTGTCCAAAAAC	42	CCGCTGCGGAACCAATGAGTGGATTGGTCCTGCTTCTGCTCCTGCCTGCGCGCAGGCATCACAAGTGCTTTGTTCCTGCCTGAGTGGCCCTCATGGAATCCCAATTCTGAATAGGAACCGAGATCCAACATCGTATTAAGTTGGTGACAGATCGCAGTAAAATCGCTGCGACACTAGTCTGGTCATGAAAATGAGGCTTGTTTCAGCGGATCTGACCTGTTCATTCTTACTCAGGGTATGTTTAGTTCCTAGAATTTTTGCCCCAAAACATCACATCGAATCTTTGACACATACATAGAGCATTAAATACAGATAAAAAACTAATTACACATTTTGCATTCAAGTCGCGAGACGAATCTTTTAAGCCTAATTAGTCCATAATTAGCTATAAGTACTACA…	AACCAATGAGTGGATTGGTCCTGCTTCTGCTCCTGCCTGCGCGCAGGCATCACAAGTGCTTTGTTCCTGCCTGAGTGGCCCTCATGGAATCCCAATTCTGAATAGGAACCGAGATCCAACATCGTATTAAGTTGGTGACAGATCGCAGTAAAATCGCTGCGACACTAGTCTGGTCATGAAAATGAGGCTTGTTTCAGCGGATCTGACCTGTTCATTCTTACTCAGGGTATGTTTAGTTCATAGAATTTTTGCCCCAAAACATCACATCGAATCTTTGACACATACATAGAGCATTAAATACAGATAAAAAACTAATTACATATTTTGCATTCAAGTCGCGAGACGAATCTTTTGAGCCTAATTAGTCCATGATTAGATATAAGTGCTATAAGTACTACA…
404	Chr01	29828119	30751806	T	TTTTGTTGACCAAATTCGTCAAATTTGAAAAGTCAAAGTATTTTAAA	46	CGCTGGTACGTTTTTTTTCCTCCCTCACAAATCGTAGATTCGTAAGTAAGCCGCTCTTTTCCAAGCGAACCGATGAAGAGAAGTTAAGCTTTATTGTTTTCTATATAGTATGTACGTACTTATGGAATATTTATGTTTTTTTCCAGTAAGGTATTAGTTTCTTTTTAAATAAAATACATCTAATCTAATCTAATGGTCTAAATTATCGGATCCACCAATTTAAGTGAAAATCGACGGCGAGATTAGACATTGCCACATGGCGGTCTAGGATCGTTTGTAGTAGTGCCACGTGGCGGCTTGAGAGCATTTGTAGGAAGTTTAATGGACTTGTAGTATATAATATATAATAGAAGATGGTAGCTACTACCTAATCTCGTGGAACAAGTCTCCCGGTCTCAT…	TAAATACGCTGGTACGTTTTTTTTTCCTCCCTCACGAATCGTAGATTCGTAAGTAAGCCGCTCTTTTCCAAGCGAACCGATGAAGAGAAGTTAAGCTTTATTGTTTTCTATATAGTATGTACGTACTTATGGAGTATTTATGTTTTTTTCCAGTAAGGTATTAGTTTCTTTTTAAATAAAATACATCTAATCTAATCTAATGGTCTAAATTATCGGATCTACCAATTTAAGTGAAAATCGACGGCGAGATTAGACATTGCCACATGGCGGTCTAGGATCGTTTGTAGTAGTGCCACGTGGCGGCTTGAGAGCATTTGTAGGAAGTTTAATGGACTTGTAGTATATAATAGAAGATGGTAGCTACTACCTAATCTCGTGGAACAAGTCTCCCGGTCTCAT…
405	Chr01	29837429	30761183	A	AGGGGATGGGGGCGACGCGGCAGAGGGAGGAGGA	33	CTACGGGAAGGCTACACATGCTACTACCGAAAACTAAGGGGAGGAGATGGATCGAGGAGGGAGAACGGGGGAATGCACTACCGAGATGAGGCGGGGCGCTGTGACGAGAGGCCGACGGCACGGGAGTGATCTCTCCGGCCTCGGGCCGGGGAAGAGGAAGAAGGCGAGCGCCCAGAGTCCCCTTCCGTGTCCTCGCTCGTGCCGGCTCCTCCGACACGCGCGACGGCGAACGGCGACAGCGAACAGAGCACGGGAGGCGGCAACAATGGAGTGGAGGCGAATGGGAGAGGAAAGGAAAGGGGGGAAGCTTGGGTTTATATTGGCGACAATGTCGGTTTGGTAGAGGGGAACCAACTTTGAACGGTCAAGCCAGCGAGCTGGCGCTCCGGCTAGCAGCCA…	CTACGGGAAGGCTACACATGCTACTACCGAAAACTAAGGGGAGGAGATGGATCGAGGAGGGAGAACGGGGGAATGCACTACCGAGATGAGGCGGGGCGCTGTGACGAGAGGCCGACGGCACGGGAGTGATCTCTCCGGCCTCGGGCCGGGGAAGAGGAAGAAGGCGAGCGCCCGGAGTCCCCTTCCGTGTCCTCGCTCGTGCCGGCTCCTCCGACACGTGCGACGGCGAACGGCGACAGCGAACAGAGCACGGGAGGCGGCGACAATGGAGTGGAGGCGAATGGGAGAGGAAAGGAAAGGGGGGAAGCTTGGGTTTATATGGGCGACAATGTCGGTTTGGGAGAGGGGAACCGACTTTGGACGGTCAAGCCAGCGAGCTGGCGCTCCAGCTAGCAGCCA…
406	Chr01	29859670	30779643	T	TGTACATAACTAGAACTAGAATCGTGTCTTTTTGGG	35	TGGTTATTTTGTAAATTCTCTCGTTGAGTTGGCAAAAACAATAAAATATTGTAGGCGGGGCCTTAAAAAAGTAACAAAAAATCACATTTTTAAATGCCTATGAGCGACGAGGCCACGTTTTTTCCTCTCCAACAAAGACCGTATTTTTGGAATATCTTCTGATAAATTTTTTAATTTATGTAAATTAGTATGCAATGCAACTATACAATTTTCTAAAGGTGGAAAACAACTAACTACATGCATAGCATATGTTGGACATGTTCGACTGACCTATACAATTCTCACTGCCACCTTATTGCTAGCTGCTACAAAAAGTGAATTGGTGCAGACAACGGGGTAACACTATACTACCTCCGTCAGGTTATAAGACTTTCTAGCATTGCCCAAATTCATATTCAT…	AGATGGCAAAAACAATAAAATATTGTAGGCGGGGCCTTAAAAAAGAATAACAAAAAATCACATTTTTAAATGCCTATGAGCGACGAGGCCACGTTTTTTCCTCTCCAACAAAGACCGTATTTTTGGAATATCTTCTGATAAATTTTTTAATTTATATAAATTAGTATGCAATGCAACTATACAATTTTCTAAAGGTGGAAAACAACTAACTACATGCATAGCATATGTTGGACATGTTCGACTTACCTATACAATTCTCACTGCCACCTTATTGCTAGCTGCTACAAAAAGTGAATTGGTGCAGACAACGGGGTAACACTATACTACCTCCGTCAGGTTATAAGACTTTCTAGCATTGCCCAAATTCATATTCATTAACATATATATGAATGTGAGCAG…
407	Chr01	29898271	30822164	CATTAGTTGGCTATACTATTAAACTTGCTCTT	C	31	TATTTGTCTTGTTTCGGTTTGTCATCTAAATTGACAGAATTTTTATCAATCGCGAAAATTATTTTCACCTGTTGCATCACACAGTCTTTTTTCTATTATCAGTAAAAATAAAAGGATTAGAATACCATCGCTCTTATACGGAGGGTGTAGAAGCAGATGGACTTGGTGCCTCAGATATTTCGACAGCTGTTTTGCTCCTTTTTGACAAGTGGCTGCTAGTACCGCTATTTACGCTTTACAGCTTTTAGATGTCAGATGTCCGATCCCAACACAGTTATTAGAGCAAGTACAATAGCATGCTACAAGTCAGTTGTAAGCACAAGAGAAGAAAAGAGAAGAGAGAAGGAAAGCGGGCTACAGATTTGTAGCTAGCTGGAATACTCATTACAATACGTTATA…	TTTATTTGCCTTGTTTCGGTTTGTCATCTAAATTGACAGAATTTTTATCAATCACGAAAATTATTTTCACCTGTTGCAACACAGTCTTTTTTCTATTATCAGTAAAAATAAAAGGATTAGAATACCATCGCTCTTATACGGAGGGTGTAGAAGCAGATGGACTTGGTGCCTCAGATATTTCGACAGCTGTTTTGCTCCTTTTTGACAAGTGGCTGCTAGTACCGCTATTTACGCTTTACAGCTTTTAGATGTCAGATGTCCGATCCCAACACAATTATTAGAGCAAGTACAATAGCATGCTACAAGTCAGCTGTAAGCACAAGTGAAGAAAAGAGAAGAGAGAAGGAAAGCGGGCTACAGATTTATAGCTAGCTGTAATACTCACTACAATACGTTATG…
408	Chr01	29900915	30824780	CCTTTTATGTTTTTGAGAGATGGGCTAAAGTTTAG	C	34	TCTTTTCGAAGAAATGTACCGGGTTATCTTTTTCAGCTTTAGTCCATGTTTTTGTCCTTTTTCTTTTCAGAAAAGCTGGAATACTCCCGGTTGAAGAAAAGCAAAACTTTCTGGGCCATTTATATCTTCTCGTACAAAAGTCAAAATCACGTTCCAACAGAAGGTACCGGGTTGGTACTGTTCACAACTGATACTGTAGCTTGTAGTAGCAATCACTGCAGTCTTGCTTAATTACCATTGAGCAGTGAGCAGTACACATCGTAATATTTAGTACGTGCAACGGTAGGTTTCACTCTTTGAATGAACTGCCAGTTTAGTAGTTCCACATTACATCATGCTTAATTATTGCGAAGGAACACAATCAAGTGGTACTATTTATCTAGAGTGGTATGTTTGGAT…	TGGGGTATCTTTTCGAAGAAATGTACCGGGTTATCTTTTTCAGCTTTAGTCCATGTTTTTGTCCTTTTTCTTTTCAGAAAAGCTGGAATACTCCCGGTTGAAGAAAAGCAAAACTTTCTGGGCCATTTATATCTTCTCGTAAAAAAGTCAAAATCACGTTCCAACAGAAGGTACCGGGTTGGTACTGTTCACAACTGATACTGTAGCTTGTAGTAGCAATCACTGCAGTCTTGCTTAATTACCATTGAGCAGTACACATCGTAATATTTAGTACGTGCAACGGTAGGTTTCACTCTTTGAATGAACTGCCAGTTTAGTAGTTCCACATTACATCATGCTTAATTATTGCGAAGGAACACAATCAAGTGGTACTATTTGCCTAGCGTGGTATGTTTGGAT…
409	Chr01	29909935	30833770	CTAGCGCCGAGCTCGAATCCACGGCTGAACCATCTCGTTC	C	39	GGACTGGACAGATTGTATCTAGATGGATCAAAATCACACACGGTACATGACTTCTGAGCACGATTGGGTATGAGCTTTTAACAAACCCTTATCGTGTTATGAGCTCATGATACGCGAGCACCGTTGAATCACCGTGGTTCACTGTGGTGTACAGACTACAGTGGTGTATGTCGTCCTTATGAATTGAGATAAGAAGGGGGAAAAAAAAGAACACGTGAAAGAACACCAATCAGTACGCAGCCGTATCAATGCAGCATGTGGCCTTTCAGAAAGATTTTGTTTCTTTAACCTTTCCAATCATGATGGGCCGGCCCAGAGGCCCATTGCCGCCAGTGGAGGACAAAAGATCAGCATGCTGCATTGCTGCCGTGCAATTCATTCCACGGCTATGAAAATGAT…	GGACTGGACAGATTGTATCTAGATGGATCAAAATCACACACGGTACATGACTTCTGAGCACGATTGGGTATGAGCTTTTAACAAACCCTTATCGTGTTATGAGCTCATGATACGCGAGCACCGTTGAATCACCGTGGTTCACTGTGGTGTACAGACTACAGTGGTGTATGTCGTCCTTATGAATTGAGATAAGAAGGGGGAAAAAAAAGAACACGTGAAAGAACACCAATCAGTACGCAGCCGTATCAATGCAGCATGTGGCCTTTCAGAAAGATTTTGTTTCTTTAACCTTTCCAATCATGATGGGCCGGCCCAGAGGCCCATTGCCGCCAGTGGAGGACAAAAGATCAGCATGCTGCATTGCTGCCGTGCAATTCATTCCACGGCTATGAAAATGAT…
410	Chr01	29953987	30911696	C	CGCCTTTCTCCGCGCGCTAGCCTCCAAGGGACGGAGGCAAAGCTCCCCTCCCTCT	54	GACGCAATCGAAGGGAAAGTGTAGCGCCCGTTCCGTCGTGGCGTCTAGCGGGAAAACTATCTCTTAAAAACCTTAATTGCGAAAATTATTTCCTCGCTTGCAGTCAGTCTCCGTGCTATTCCGGATCTCAAATCCCCGATCTATCGTCAAGTTCAACTCCCGAATCCAAATTCAAATCCCTCCGCAAAAGTCTATTTTGCCCCCCTCAGGTTCGATGGGCCGAATTCCTCTCGGCCCATCTCCCCCTCCCTCCCCATCTTCCTTCTCTCTCTCTCTCTCTCTGCCCGTGAGCCGCGCCGAGCCCTCCCTCTCCGCTCTCGCTGCCGTTCCCGCCGACGCCGCCCAAATCGCCGCGCCGCCCTCGTGCGCACGCCGTGGTGGCCGACCGCCTGGTCGCCG…	GACGCAATCGAAGGGAAAGTGTAGCGCCCGTTCCGTCGTGGCGTCTAGCGGGAAAACAATCTCTTAAAAACCTTAATTGCGAAAATTGTTTTCTCGCTTGCAGTCAGTCTCCGTGCCATTCCGGATCTCAAATCCCCGATCTATCGTCAAGTTCAAGTCCCGAATCCAAATTCAAATCCCTCCGCAAAAGTCTATCTTGCCCCCCTCAGGTTCGATGGGCCGAATTCCTCTCGGCCCATCTCCCCCTCCCTCCCCATCTTCCTTTTCTCTCTCTCTCTCTCTGCCCGTGAGCCGCGCCGAGCCCTCCCTCTCCGCTCTCGCTGCCGTTCCCGCCGACGCCGCCCAAATCGCCGCGCCGCCCGCGTGCGCACGCCGTGGTGGCCGACCGCCTGGTCGCCG…
411	Chr01	29980807	30965302	CAAGCAAGCTTTGTGCCAAAGTTAAGCAAGCTTTGTGCCAAAGTT	C	44	CCTAAAGATTCTGCAGTCATACATGACTACACTGAGGACTGCAGATTTACAAGTCTTCCTCATCCTGGATACATATACAGATTTAATAGGATCCCAAACACACAAGCACAACGTTGCATTATGACATGATACGGCAACACCTCACATATAGAATTACACTTTCGGCCTGTTTCACTTTGAAAACCCTTTATCCCATCTTTTCACTCTGGACTACTCAAACTATTCTTTTCAGCACATCAACGATCTTGACCGCATTAGCTCCAAAGTGCTGATGAACTCCCGTAACCATGCACAAGCTATATCTCTTGTCGGAGTTGTTAGACGACATGGCTAGAGACGAGAACAAAATGGTCAGAATGGGCAACAAAGACTGTAATGTAGGATGTTAGCCTCATTTTA…	AGATTCTGCAGTCATACATGACTACACTGAGGACTGCAGATTTACAAGTCTTCCTCATCCTGGATACATATACAGATTTAATAGGATCCCAAACACACAAGCACAACGTTGCATTATGACATGATAATACGGCAACACCTCACATATAGAATTACACTTTCGGCCTGTTTCACTTTGAAAACCCTTTATCCCATCTTTTCACTCTGGACTACTCAAACTATTCTTTTCAGCACATCAACGATCTTGACCGCATTAGCTCCAAAGTGCTGATGAACTCCCGTAACCATGCACAAGCTATATCTCTTGTCGGAGGAGTTGTTAACGACATGGCTAGAGACGAGAACAAAATGGTCAGAATGGGCAACAAAGACTGTAATGTAGGATGTTAGCCTCATTTTA…
412	Chr01	30056708	31071981	CGCGTGAAGCGTTTCTCCCCTTTCTGGCGCGGCCGCGC	C	37	TCCAAAATACGAAGGAGCAAAAAATCAATAGAAATTCCCCCAAAACACCTTACCTCGGTCCGGTAGGCGCCGACGCCGAGATTGACCTTCACGGGGCTGGGATCCTTGTTGTACGCGACCGTCACCTACCACAACACCAACGGGAGCACCGATCAGGTCGAGCGAACCCAAAAAACCGCGCGATCACGGCCGAAACCGGTGAAGACAGCGATGGGGAGCGGGAGTGAGATTGGGAGACGAGAGGGGGATCTTACCCCGAGGATGGGGTCCTCCGGCGCCTGCGCGAGGCCAGCGAAGACGGACGACGACGCCATGGTGGGGAAAGCTTGGAGGGAGGAGTCGGCGTCGGCGGCGGAGGAGGAGGTGCTGGTGGTGGTTGCTGTTCGTGCGGAGGAAGGC…	TCCAAAATACGAAGGAGCAAAAAATCAATAGAAATTCCCCCAAAACACCTTACCTCGGTCCGGTAGGCGCCGACGCCGAGATTGACCTTCACGGGGCTGGGATCCTTGTTGTACGCGACCGTCACCTACCACAACACCAACGGGAGCACCGATCAGGTCGAGCGAACCCAAAAAACCGCGCGATCACGGCCGAAACCGGTTAAGACAGCGATGGGGAGCGGGAGTGAGATTGGGAGACGAGAGGGGGATCTTACCCCGAGGATGGGGTCCTCCGGCGCCTGCGCGAGGCCAGCGAAGACGGACGACGACGCCATGGTGGGGAAAGCTTGGAGGGAGGAGTCGGCGTCGGCGGCGGAGGAGGAGGTGCTGGTGGTGGTTGCTGTTCGTGCGGAGGAAGGC…
413	Chr01	30098255	31113439	TTACATAATTAAGATTGCATATATAATTGAGATTAGA	T	36	TCCAAATTAGTGCGTCTGCTATATCCTGGAGAAAGAAGCGACAAATTTAGCATTTCTAATTCTCTCCTCACGCCATATTGCAACCCTTTTTTTCTGCACCGAGCTCATGCCCATATCCGGATTGACCAAACGACGCCTTGTCTATTGTTGTTGTCATCACTACTCGGTGCAGCTGAGCCCCCCTCCCCCCCCTCTACTTTTTTTTGGCGGCAATGGCAACAATGGGGCACCGGCGAGTGGAACCACAGAGGAGTGAAGGTGGAGAGGAAGGAGCATACTAAATCTGTAGGTAGGGATGGATTGTAGGGTGGTGGATGTGGTCGGCGGCGGCATACCCACTCTGCCTGCAGCACCTCCGGCCATGCACCGCCCACACGGACCCCAGTTGCGCCATCCTTG…	CACATATACCATCCGGTCCTCCAAATTAGTGCGTCTGCTATATCCTGGAGAAAGAAGCGACAAATTTAGCATTTCTAATTCTCTCCTCACGCCATATTGCAACCTTTTTTTCTGCACTGAGCTCATGCCCATATCCGGATTGACCAAACGACGCCTTGTCTATTGTTGTTGTCATCACTGCTCGGTGCAGCTGAGCCCCCCTCTCCCCCCCCCCCCCCCTCTACTTTTTTTGGCGGCAATGGCAACAATGGGGCACCGGCGAGTGGAACCACAGAGGAGTGAAGGTGGAGAGGAAGGAGCATACTAAATCTGTAGGTAGGGATGGATTGTAGGGTGGTGGATGTGGTCGGCGGCGGCATACCCACTCTGCCTGCAGCACCTCCGGCCATGCACCGTCCA…
414	Chr01	30156457	31164769	C	CACGTACTAAAAAATCAACGGTGTCAAATATTTTAAA	36	GAGACCTCATATTTTCATTTCCTTTGAGATGTTTCAGAGCATTCTGATCTTTCTGATCTCTGTGTGTGTGTGTGTGTGTCTAAGATAAATTGTGCAGACTTTTTCTTTAAGAATTTCTGCAAATTTCAGTGCCTAAACGATTCTTCATGTTTAATTCTTGTATGATTAAACTAGCCATGCATGACATGCATCCAAATTCTTGTATATATAATACATTACATTCCAAATGGGCCCTATATAGACTGGAGCAGCCTATATATGTCTAAAACAACTACTCCAGATCGTTGTGGAATATCCATAGTACTAGTTAATTACTCCCTCCGTTTCAAAATGTTTGACACCGTTAACTTTTTAGCACATGTTTGACTGTTCGTCTTATCAAAAAAAATTGTGAAATAT…	TGAGACCTCATATTTTCATTTCCTTTGAGATGTTTCAGAGCATTCTGATCTTTCTGATCTGTGTGTGTGTGTGTGTGTCTAAGATAAATTGTGCAGACTTTTTCTTTAAGAATTTCTGCAAATTTCAGTGCCTAAACGATTCTTCATGTTTAATTCTTGTATGATTAAACTAGCCATGCATGACATGCATCCAAATTCTTGTATATATAATACATTACATTCCAAATGGGCCCTATATAGACTGGAGCAGCCTATATATGTCTAAAACAACTACTCCAGATCGTTGTGGAATATCCATAGTACTAGTTAATTACTTCCTCCGTTTCAAAATGTTTGACACCGTTGACTTTTTAGCACATGTTTGACTGTTCGTCTTATCCAAAAAAAATTGTGAAATAT…
415	Chr01	30234904	31243294	G	GCCGCCGCCGTCGCCCGCACGCCCTCGCCGCGG	32	GATAGAATGTGTGACCTGGATCAGGAGTGCATCGACTGCAGGTTAAGCACTTGGGTGAAACTGACCGTCCAAGAACCAGCGAACGTTTAGGATTCTCTGACCTCGCCTTCTCCTTCCCTTCCCTTCATCAAGATTTGGTTACAATTTTGGGGCAATTGCATCTACGCCCCCACTTTCAAACCCAATTGCTGTTTTATCTTCACTTTTTAGGGACATGTATACCCTCTGCATCCAGCAATATCGTGCAGGGGAGGACCTGGAACAAGGGACGGGGAGGAGGGCGCCGTAGGCGCCGACGTCGACGTCGAGCAGGATGGGGTCGTCGCCGGCCACGGGAGCAGTAGCAGCAAAAGCGATGGTGGGGGCAGGCGGAGGCGGGGGCTGACGACGATGCCTCGG…	TCGACGGGATACCGGATAGAATGTGTGACCTGGATCAGGAGTGCATCGACTGCAGGTTAAGCACTTGGGTGAAACTGACCGTCCAAGAACCAGCGAACGTTTAGGATTCTCTGAAAGCTTCCCTTCATCAAGATTTGGTTACAATTTTGGCGCAATTGCATCTGCGCCCCCACTTTCAAACCCAATTGCTGTTTTATCTTCACTTTTTAGGGACATGTATACCCTCTGCATCCAGCAACATCGTGCAGGGGAGGACCTGGAACAAGGGACGGGGAGGAGGGCGCCGTAGGCGCCGACGTCGACGTCGAGCAGGATGGGGTCGTCGCCGGCCACGGGAGCAGTAGCAGCAAAAGCGATGGTGGGGACAGGCGGAGGCGGGGGCTGACGACGATGCCTCGG…
416	Chr01	30256201	31264386	GAGACCAAGAGTTACGAAGGTTTACATAGGGATTACA	G	36	GGACTCTGCCTTTTCTTTTTCTTCGATTAATGTGAAAATTTCTAAACCATGAGAGTGAACGTGGAGGCTCATTTTTCTATTTCTTTAATAATATAATAGATTTTATAAATTAATCCTTTAACTTCTCAATATTAAAAACAAGCAAATGTAAATGGATAAGCACATATAAAATTGAATTGGGGTTGATATTCTCTATAGCAAAAGAGAATGGGTAACACATTTTGTGAAAAATATATTTTTATTTATTTCAGATAGTATAATTTCTTTCATCCTTAGCAAAGTACAGGAATTCAGCTAGTCATAAAAAAAGACTCAAAATTTATACAAACAAATTACTGTTATATACTTGTTGTTGACGGATCGTTCGGAAAGGGCCCACCTATCCCGTACCGAATAAGA…	GATTCTGCCTTTTCTTTTTTTCGATTAATGTGAAAATTTCTAAACCATGAAAGTGAACGTGGAGGCTCCTTTTTCTATTTCTTTAATAATATAATATATTTTATAAATTAATCCTTTAACTTCTCAATATTAAAAACAAGCAAATGTAAATGGATAAGCACATATAAAATTGAATTGGAGTTGATATTCTCTATAGCAAAAGAGAATGGGTAACACATTTTGTGAAAAATATATTTTTATTTATTTCAGATAGTATAATTTCTTTCATCCTTAGCAAAGTACAGGAATTCAGCTAGTCATAAAAAAAGACTCAAAATTTATACAAACAAATTACTGTTATATACTTGTTGTTGACGGATCGTTCGGAAAGGGCCCACCTATCCCGTACCGAATAAGAAG…
417	Chr01	30293583	31290139	TGTTTGTTGTTTTTTTCATCGATTTTAGATCCAGCGCCAGGCAG	T	43	TCTATACAGTGGCGGATCCAACGCGAGTACTTGGGGCCTAAGCCCCCTATCCCATGGAGTAGAGGAAGATGGAAGAAGAATAAGAGGGGAGATGGAGGGATAAGGCGGCAACGAGCCCCTCGCCAACCTCTCTCTTTGCTGGTGTAAGAATTATTAGTCGTTGTTTCTTCATTTATTTAGAACTAGGATCTCGATCTGCCCTGCCTCTCGAAGAGGGAGGATCATCCTATTTTGCTCGTGTAAGAATTATTAGTTGTTGTTTTTTCATTGATTTAGATCTAAGATCTCCTTTTCTCATCATGTAAGAATTACTGGTTGTTGTTTATTCATTGATTTAGATCTAAGATCTCCCTTTTCCATCATGTAAGTATCACTGGTTGTAGTTTTTTCATCGGTTTA…	CTCTATACAGTGGCGGATCCAACGCGAGTACTTGGGGCCTAAGCCCCCTATCCCATGGAGTAGAGGAAGATGGAAGAAGAATAAGAGGGGAGATGGAGGGATAAGGCGGCAACGAGTCTCTCGCCAACCTCTCTCTTTGCTGGTGTAAGAATTATTAGTCGTTGTTTCTTCATTTATTTAGAATTAAGATCTCGATCTGCGCTGCCTCTCGAAGAGGGAGGATCATCCTATTTTGCTCGTGTAAGAATTATTATTAGTTGTTTTTTCATTGATTTAGATCTAAGATCTCCTTTTCTCATCATGTAAGAATTACTGGTTGTTGTTTATTCATTGATTTAGATCTAAGATCTCCCTTTTCCATCATGTAAGTATCACTGGTTGTAGTTTTTTCATCGGTTT…
418	Chr01	30308457	31304989	T	TCTGATCGTGCAGGAACAGCGAGCTGAGCATT	31	ACTCCGCCACGGCACCGAGACGCCCCGGATTCTCGCTCCACGCCCTCACGTTCTCGTCCGCCTCCGCGTCCCTTCGCCTCGTCGCCATGGGACTTCCTCGCGGGGAACCTGCACACGGCGCGTAAAAGCGGATTGAGCGACGAAGCAACCGAAAATTGAGGGGAATTATACGCGGAGAGGAGACTTAGATTAGATTAGATCCGGGCGGCAGCACCCACTCACCATGCGGAAGAACTCGCTTGGGCAAATCCATGGCGGCGAGGGGGTTGATTTGATGGTTCGGAGCGGCGGCGGGTGTCGATTCGGGGGGGTGGGATGATGGGGAGATGGGAAGAGACGGTGGCTTGGGGATTTGAACCGGTTTGGATCTTGCCGACCGTTGGAGCCGGCGATGCGGTT…	ACTCCGCCACGGCACCGAGACGCCCCGGATTCTCGCTCCACGCCCTCACGTTCTCGTCCGCCTCCCCGTCCCTTCGCCTCGTCGCCATGGGACTTCCTCGCGGGGAACCTGCACACGGCGCGTAAAAGCGGATTGAGCGACGAAGCAACCGAAAATTGAGGGGAATTATACGCGGAGAGGAGACTTAGATTAGATTAGATCCGGGCGGCAGCACCCACTCACCATGCGGAAGAACTCGCTTGGGCAAATCCATGGCGGCGAGGGGGTTGATTTGATGGTTCGGAGCGGCGGCGGGTGTCGATTCGGGGGGGTGGGATGATGGGGAGATGGGAAGAGACGGTGGCTTGGGGATTTGAACCTGTTTGGATCTTGCCGACCGTTGGAGCCGGCGATGCGGTT…
419	Chr01	30781920	31561049	CTACCCCTCACGGCAGCCTGATGACCAGAGACTAGGGA	C	37	CTTTGCGTGTTCTCCATAACATTTGGATGCAGAATTACAGTGATTCTTAAGGACCTTCTTATTACTCCTTTACTGTTTCTCTTAAAAAAATACCCCTGTTACTATAGTGCAGTTCTAGAATATGTGGATCATATAGACATTACTCAAAGAAAATGTGGCGACGTCCCGTGCTCCACTCCTCCATCGTGCATCGCAGTTGCGTCTAGGGGTGCGGCGTGTGGCATTGGAAAATTTTCAAGAGCTACTCGATGTGACACAGGCAGGCAAGGCCATCTACGATGGTGAGTGAACACTGCTGCCAGCTAGTTTTGGGTTGTTTAGGCCAGCGAGTTGGGCCAGGAAAGCAGGGAGGCGGCAAGCAGGCCCAAACAGTGAAGAAGATGAACTGAATACATCATT…	CTTTGCGTGTTCTCCATAACATTTGGATGCAGAATTACAGTGATTCTTAAGGACCTTCTTATTACTCCTTTACTGTTTCTCTTAAAAAAATACCCCTGTTACTATAGTGCAGTTCTAGAATATGTGGATCATATAGACATTACTCAAAGAAAATGTGGCGACGTCCCGTGCTCCACTCCTCCATCGTGCATCGCTGTTGCGTCTAGGGGTGCGGCGTGTGGCATTGGAAAATTTTCAAGAGCTACTCGATGTGACACAGGCAGGCAAGGCCATCTACGATGGTGAGTGAACACTGCTGCCAGCTAGTTTTGGGTTGTTTAGGCCAGCGAGTTGGGCCAGGAAAGCAGGGAGGCGGCAAGCAGGCCCAAACAGTGAAGAAGATGAACTGAATACATCATT…
420	Chr01	30820596	31599696	A	ATGATCATAAATAGTTTTATAATAAAGCATGACGGATTTTTGTTTCAAGTTTGGTT	55	ATCTGTACTTCATGATCATAAAATAGTTTTGTAATAAAGCATGACGGATTTTTTTCTACCAGTAGACAGTCCCATAGCTCAAAGCAAAGTGATTTGTGGGTGATCTAATATTGTTCTATCAGTTCAGTTGCAGAACCCCATCCCCCTCCCTCTACGAAGAGCCCCGACTGTCTCCACTATTCATCACAACTCTTGTGGTTGGCTTTAGCCAACACCCAGTGGCCATCCTATGGGTTCAGTCACCGAGGTGCTTAGAGGGTTTCCCATCGAGAATCCAAGATCAAGATGATCATTGAGGAATGATCCTTTTAAAGGTGATTGGATATATATGTGTATGTCTCTGTGTTTTAGCCTTTTAAAAACTAATTTTATAAATAGGCTTGGAAAAAAAAGCATCTA…	CTATCTGTACTTCATGATCATAAATAGTTTTGTAATAAAGCATGACGGATTTTTTTTCTACCAGTAGACAGTCCCATAGCTCAAAGCAAAGTGATTTGTGGGTGATCTAATATTGTTCTATCAGTTCAGTTGCAGAACCCCATCCCCCTCCCTCTACGAAGAGCCCCGACTGTCTCCACTATTCATCACAACTCTTGTGGTTGGCTTTAGCCAACACCCAGTGGCCAACCTATGGGTTCAGTCACCGAGGTGCTTAGAGAGTTTCCCATCGAGAATCCAAGATCAAGATGATCATTGAGGAATGATCCTTTTAAAGGTGATTGGATATATATGTGTATGTCTCTGTGTTTTAGCCTTTTAAAAACTAATTTTATAAATAGGCTTGGAAAAAAAAGCATC…
421	Chr01	30836890	31618755	G	GTTATATATATATATATATATATATATATATA	31	CCCTCACCATCGTCGTTGCCCGCCGCCGCCGGATGGGGAGAGAGAGCGGGAGAGGAGAGGAGTGGAGTGGGGGTGAGGGGGGGGAGAGAATGAGAGAGTGAAGAATAAAAAAAGGAGTGGGAAACTTCTAGGGGTATTTTTTGCAATCGGGTGAGATAAGAGTCCCGCATGTGAAAACACCCTTATTTTCGTGTGCGGATATTTTAAGCGGTCTGTTCGAAAAAAATATTTTTTTCATACGAATATCTTAAGGAGCTGTATGGAAAAATGAGGGTCGATTTTTACATACACGAACACTTATGATCCGTCCGTAAACTATTGGGGTGCCCATTCAAAAAAGTCATTTTTAGTGGGGGCCGTTGATTATCATTTATTTTATTATGAATTAATTAATCATCA…	TCACCATCGTCGTTGCCCGCCGCCGCCGGATGGGGAGAGAGAGCGGGAGAGGAGAGGAGTGGAGTGGGGGTGAGGGGGGGGGGGAGAAAATGACAGAGTGAAGAATAAAAAAAGGAGTGGGAAACTTCTAGGGGTATTTTTTGCAATCGGGTGAGATAAGAGTCCCGCATGTGAAAACACCCTTATTTTCGTGTGCGGATATTTTAAGCGGTCTGTTCGAAAAAAATATTTTTTTCATACGAATATCTTAAGGAGCTGTATGGAAAAATGAGGGTCGATTTTTACATACACGAACACTTATGATCCGTCCGTAAACTATTGGGGTGCCCATTCAAAAAAGTCATTTTTAGTAGGGGCCGTTGATTATCATTTATTTTATTATGAATTAATTAATCATCA…
422	Chr01	30867482	31649454	C	CCAAAAGAAAATCTCACAATTCACAACTATACGT	33	AATGGTCATATGTAGTACTAGGGATTATGTGTTAGGATAACAGTAGCTTATCATGTGTGTTTTGTTTGCAAAATGCTATGCCCAGCTAGCCGCTAGCGTTACGAGCGTCCACCGCCAACCCATTCTGCAGGGTAAAAGATTGGACCCCTTTGTGCGGCCCATGGGGCGGTGAACAGAATCACCCCGCACGACGCACACGCGTTCGCCGCGCGCGCGCGACTACGCGACCGTGACCGCGACGCGGGCATATTTGCAAAAAAAAAAAATTGTGAATAAAACTTTTATATACATGTTTTTACCGATCTAAAAGCAAAGACTGAAAAATAAATTTCGATAAAAAAACCCCTCAAAATTAAATTTAAATCTAAGATAGAAAATTTAAGTTTTAGCTGATAAGTA…	GTAGTACTAGGGATTATGTGTTAGGATAACAGTAGCTTATCATGTGTGTTTTGTTTGCAAAATGCTATGCCCAGCTAGCCGCTAGCGTTACGAGCGTCCACCGCCAACCCATTCTGCAGGGTAAAAGATTGGACCCCTTTGTGCGGCCCATGGGGCGGTGAACAGAATCACCCCGCACGACGCACACGCGTTCGCCGCGCGCGCGCGACTACGCGACCGTGACCGCGACGCGGGCATATTTGCAAAAAAAAAAAAAAAAAAGAATTTGTGAATAAAACTTTTATATACGTGTTTTTACTGATCTAAAAGTAAAGACTGAAAAATAAATTTCGATAAAAAAACCCCCTCAAAATTAACTTTAAATCTAAGATAGAAAATTTAAATTTTGGCTGATAAGTA…
423	Chr01	30993987	31804753	TTTTATTAACAGGATGTACGAGCAGACGCCCT	T	31	AATCCGCCACCGGATTCGTGTAGTGGGGAATCAGAGTAGGCAGTAGTGGGGGGGGGGGGGGGGTACTTGCGTGTTCGGTTCGACAGGACACCTGGCGCTTCCCTTTCTCTGCGATTCGCTTGCGCCGCATGGTGGATGAATCCCCTTTTGGGATCCGGCCGTGGTCTCGAATTGTCTCCCATGGAATCGGGATGCTCATTCCTCGGCGACCTTTCCCCACTGCTACTTTTGTGGGTCAATGACGTTTTCATAGGTATAAAGTTGAATGTACAATCCTTTTCTGCGAAGGAAATGCAGACTTGTTTTGGCCGTCGGATCATGCAGCTGACGGTTCAGATCATTGATGGTCTGATGAAGGAACTGTCATCTCTGTTCTTCAGCGTGATCCATTGAGGGCAT…	CGCCACCGGATTCGTGTAGTGGGGAATCAGAGTAGGCAGTAGTGGGGGGGGGGGGGGGGGGGGTACTTGCGTGTTCGGTTCGACAGGACACCTGGCGCTTCCCTTTCTCTGCGATTCGCTTGCGCCGCATGGTGGATGAATCCCCTTTTGGGATCCGGCCGTGGTCTCGAATTGTCTCCCATGGAATCGGGATGCTCATTCCTCGGCGACCTTTCCCCACTGCTACTTTTGTGGGTCAATGACGTTTTCATAGGTATAAAGTTGAATGTACAATCCTTTTCTGCGAAGGAAATGCAGACTTGTTTTGGCCGTCGGATCATGCAGCTGACGGTTCAGATCATTGATGGTCTGATGAAGGAACTGTCATCTCTGTTCTTCAGCGTGATCCATTGAGGGCAT…
424	Chr01	31015927	31826584	A	ATGTGTGTGTGTGTGTGTGTGTGTGTGTGTGTGTGTGTG	38	ACTATTCCAATTTTTTTTTAAAAAAAACAAGTTAAAATGTTTTATATTTTTATTATTATGCTAATTTGTCATTTAATGCATCAGGGAGCTGTGAAACGCTAGAAACAAAACCAAAAGAGAGGGGATTGGACATTAGACAGGAGCTTCTGAAGTTCTATGAGAATTATTCAGCAAACCTTATGCACCTTGTTGTTTATGGAAAGGGTAAATATTACTGGTTAGTCCATTCTCATACAAACTTATCTGTTACTGAGATTATTTATTTATTTTGGTAGAGAGCCTGGATTGCATCCAAAGCTTTGTTGAGCACATGTTTAGTGACATCAAAAACACTGATCAGAGAAGCTTCAAATGCCCAAGTCAACCTCTTTCAGAAGAGCATATGCAGGTAGAAACTTG…	ACTATTCCAAATTTTTTTTAAAAAAAACAAGTTAAAATGTTTTATATTTTTATTATTATGCTAATTTGTCATTTAATGCATCAGGGAGCTGTGAAACGCTAGAAACAAAACCAAAAGAGAGGGGATTGGACATTAGACAGGAGCTTCTGAAGTTCTATGAGAATTATTCAGCAAACCTTATGCACCTTGTTGTTTATGGAAAGGGTAAATATTACTGGTTAGTCCATTCTCATACAAACTTATCTGTTACTGAGATTATTTATTTATTTTGGTAGAGAGCCTGGATTGCATCCAAAGCTTTGTTGAGCACATGTTTAGTGACATCAAAAACACTGATCAGAGAAGCTTCAAATGCCCAAGTCAACCTCTTTCAGAAGAGCATATGCAGGTAGAAACTTG…
425	Chr01	31051786	31862458	C	CGCCGCCGGCCCCTCCACCGCGCGCACGGCT	30	GCAGGCGGATCGCCTGCTTGCAAAGATGATCTTCGCAGGCGGACCGCCCGCGTGCGAAGATGATCTTCGCAGGCGGACCGCCCGCCTACGAAGATCTTTGCCCTATATAAGGGCAAGCCCGCAGCGCCAAAATTTCTAAGTCCAGGCGGGAACCCTAGAAATTTTGGCGCCGTCAGGCTGCCGAAATTTTTCACCGCCGCACGCCTCCGCCGTCCTCCACCGCCGCCCCGCCTGTGACCTTCGCTCTCCGATCGTCGTCCTCCGCCGCCGCCAACCGTCGTCGTCCACCACCGAGACCGACGTCCTCGGCCGCCGCCGACCGTCGTCGAGCTCTCTGCCACCGCCGCCGCCGACCCCTCCACCGCGCGCCCGCTCCACCGCCGCCGGCTCCTCCACCGC…	TTACCAGTTTGTTAAAAAGATCTTCGCAGGCGGACAATCCGCTTGCGAAGATAGTAAAAAAAGATCTTCGCAGGCGGACCGCCTGCCTGCGAAGATCTTTGCCCTATATAAGGGCAAGCCCGCGGCGCCAAAATTTCTAAGTCCAGGCGGGAACCTTAGAAATTTTGGCGCCGTCAGGCTGCCGAATTTTTCACCGCCGCACGCCTCCGCCGTCCTCCGCCACCGCCCCGCCTGCGACCTTCGCTCTCCGATCATCGTCCTCCGCTGCCGCCGACCGTTGTCGTCCACCACCAAGACCGACGTCCTCGGCCGCCGCCGACCGTCGTCGAGCTCCCTGCCACCGCCGCCGCCGACCCCTCCACCGTGTGCCCGCTCCACCGCCGCCGGCTCCTCCACCGC…
426	Chr01	31052172	31862779	G	GAGGGGGTATATATGTGTGTGCATGTGGGTGTG	32	GCTCCTCCACCGCCGCCGGCTCATCCACCGCCACAGGCTCCTCCACCGCCACCGGTCTCTGCCACCGCCACCGGCTCCTCCACCGCGAGCGCGGCCGTCGGTGGCCCCTCCACCGCCGCCAGCCCCTCCACCGCCGTCGGCCACCCCTCCACCGGCGCCGGCCGTCGGCCCCTCCACCGCTGTCGGCCACCCCTCCGCTCGCGGCCGAACGGCTTCATCGGCCGATCGTCGTCCACGAGCGAAGACTTCCTCGGCCGAACGACGTCTTCGGCCGGTCGTCGTCCACGGCCGAACCTCGTCGTCGGCCGTTCGTCGTCCACGGCCGACGCCGGTCGTCGTCCACGGCCGAACCTCGTCGCCAGCCCTTCCTTCGTCGTCCACGACCGAAGCTCGTCACCG…	GTCGTCGAGCTCCCTGCCACCGCCGCCGCCGACCCCTCCACCGTGTGCCCGCTCCACCGCCGCCGGCTCCTCCACCGCCACCGGCTCATCCACCGCCACAGGCTCCTCCACCGTCACCGGTCTCTGCCACCGCCACCGGCTCCTCCACCGCGCGCGCGGCCGCCGGTGGCCCCTCCACCGCCGCCGGCCCCTCCACCGCGCGCACGGCTGCCGCCAGCCCCTCCACCGCCGTCGGCCACCCCTCCACCGGCGCCGGCCGTCGGCCCCTCCACCGCTGTCGGCCACCCCTCCGCTCGCGGCCGAACGGCTTCATCGGCCGATCGTCGTCCACGAGCGAAGACGTCCTCGGCCGAACGATGTCTTCGGCCGGTCGTCGTCCACGGCCGAACCTTGTCGTCG…
427	Chr01	31083901	31890781	CATTAAACATTCTATAAATGTTTCTAAACCGTTATA	C	35	GGTTTGCTAAGTCCCAGTGTCCCACTGGTCAGGCAATTGCAATCGGATGCATTTTTGGTTAACTTTTCGCTGGAGATCATACAACTATCTATCTATCTGTCTTCCTGTCTATCTATTTATATATTCTGTCTTAAAATATAGATATTTTGAACGGATAAAACACATCCTACTATTTTAAAATCACTTATATTTTACGACAGAGAGACTACTAAAAATTTATTAAACTTTCTACAAACGCTCTCGAGCTGCTACGCGACACCCTATAAATACATCTAAGTCAATACGTGATACTCTAATAAAGTATATCACTATATCTATTTTACCAAACCAAAACCTCCCACCATCCCCACCTCCTTGCGGCATGTGCACGCACGCAAGTACCGACTGTTGTACGCACCC…	TTGCTAAGTCCCAGTGTCCCACTGGTCAGGCAATTGCAATCGGATGCATTTTTGGTTAACTTTTCGCTGGAGATCATACAACTATCTATCTATCTGTCTTCTTGTCTATCTATTTATATATTCTCTGTCTTAAAATATAAAATATTTTGAACGGATAAAACACATCTTACTATTTTAAAATCACTTATATTTTACGACGGTGAGACTATTAAAAATTTATTAAACTTTCTACAAACACTCTCGAGCTGCTACGCGACACCCTATAAATACCTCCAAGTCAATACGTGATACTCTAATAAAGTATATCACTATATCTATTTTACCAAACCAAAACCTCCTACCATCCCCACCTCCTTGCGGCATGTGCACGCATGCAAGTACCGACTGTTGTACGCACCC…
428	Chr01	31179709	31958205	G	GAGGAGGAATCACCTCTCTTTTTTTTCAGGGAATTACACAGTACAACGCA	49	AAACAATGCGTCCAACCTGTGTTGAGTACTCCCTCCAAGCTGATAATACTTGTCATTTAAGATAAATGTGAGGTCAAACTTTAGAATCCTTTATTATGAATCATTTTAAAAATATTTATCTTTCAAATATGGTGACTACGTGTATAGATTAGTCTTAAAAGGTACTTTAATAAAATCATGTATTTATTAACACTTTTATACATATTATAATGGAAAAATAATGGTCAAAGTTGTTTTTTAAGATCGTGCACTACCGACAAGTATTATCAACTCGGAGGGATTAATTATTATTCTATGCTCAAATAGAATAGAGCATTTTGAGTAATTTTTTATAAGTTTATGGTCTCTATTTGCTCTCAAACCTGTAACAAGGTGGTTGATCGTCTGGCTGCTTTGGTT…	AAACAATGCGTCCAACCTGTGTTGAGTACTCCCTCCAAGCTGATAATACTTGTCATTTAAGATAAATGTGAGGTCAAACTTTAGAATCCTTTATTATGAATCATTTTAAAAATATTTATCTTTCAAATATGGTGACTACGTGTATAGATTAGTCTTAAAAAGTACTTTAATAAAATCATGTATTTATTAATACTTTTATACATATTATAATAGAAAAATAATGGTCAAAGTTGTTTTTTAAGATCGTGCACTACCGACAAGTATTATCAACTCGGATGGAGTAATTATTATTCTATGCTCAAATAGAATAGAGCATTTTGAGTAATTTTTTATAAGTTTATGGTCTCTATTTGCTCTCAAACCTGTAACAAGGTGGTTGATCGTCTGGCTGCTTTGGTT…
429	Chr01	31245520	32033877	AGCACCCTGCCTCGAGCGTGAAACGGGATCAACG	A	33	ATTTTTTCTTTATATGTCAATCGAATTTAGACTTGCATGTTTGTATATTGTCTTATATTATTATAGTCTATCTTATCAAATTTTATGAAACTTTTATATAACTGTTTAAATTACATGCATACACCTATGTGTCATGGCACCTAGATGTAAAAAAATACTTTCTCAATTTATGAGCAAGCACTTGACACTCCACAGCAGTACAGATACAAAGTTTTGAAAATCACACCTGGCATGTAAACACGACATACACAAAGCCCGTCAGAAACACGGGTTTTGCCGGTTCTCACTTCTCACTGCTTGGTTTCAGCTAACAGCGAGCATCCGAGCAACAGCGCGGTGATCGCCGTCGTCGTCGCGACCATTTCCGGTGTTCTCCTGCTTGGAGCAGTTGGCGGCTGG…	ATACTACACCAACTATAGTAATATTAGTATCTCCCATACCACGTAACGCATTCTCTGGATTAGGTGAGGTGCAGTCAAAACAACAAACGTCCAACACCACCCAACTTGATAGTGACTCTCAACAACGAAAAGATGTTCTCTGGATATGCTAATTTATGAGCAAGCACTTGACACTCCACAGCAGCACAGCTGTACAGATACAAAGTTTTGAAAATCACACCTGGCATGTAAACACGACATACACAAAGTCTAAGCCCGTCAGAAACACGGGTTTTGCCGGTTCTCACTTCTCACTGCTTGGTTTCAGCTAACAGCGAGCATCCGAGCAACAGCGCGGTGATCGCCGTCGTCATCGCGACCATTTCCGGTGTTCTCCTGCTTGGAGCAGTTGGCGGCTGG…
430	Chr01	31294646	32085104	GCCCGCGCCGCTCCTTCCCGGCACCGATGCCGCCGCCCGCGGCTCTCCTCCCTGGC	G	55	TATGAGTATTCTATTAATCCTATTAAACCCTGGGCCGGGATGTTACACTAAACCAGGCTATACAGTTAGTAATGTATCATACCGAACCAAGCCTACAATTAACGGAAGAAATCAGCCGCTACCCATTTTTAGTCCTGTTTTTTTTAATCTTATTCACTGAATTAGTTTAGGGATGGACAGGAAGCTCGTGGCAGGCTCGGCTCGGCTCGCCTTGCCTCATTTGAATTTCCTAACGAGCCGAGCTGGCATTTCAGCTCGTTAGAGATAACGAGCCAGCTCGAGCTGGCTCGCGAGCAGCTCGCGAGCCTTAACGAGCCAGAGCAGATGAGGCCCAGGCGCCCAGCCCAACTCAACAGCCCATCACCTTCTAAAAACCCTAGAGTAAATCCCCTTCTGGCT…	TCTGAAAAAAGAAGTTGCAACTTGTTGATATGAGTATTCTATTAATCCTATTAAACCCTGGGCCGGGATGTTACACTAAACCAGGCTATACATTTAATAATGTATCATACCAAACCAAGCCTACAATTAACGGAAGAAATCAGCCGCTACCCATTTTTAGTACTGTTTTTTTTATCTTATTCACTGGATTAGTTTAGGGATGGACAGGAAGCTCGTGGCAGGCTCGGCTCGCCTCGCCTCGCCTCGTTTGAATTTCCTAACGAGCCGAGCTGGCATTTCAGCTCGTTAGAGATAACGAGCCAGCTCGAGTTGGCTTGCGAGCCTTAACGAGCCAGAGCAGATGAGGCCCAGGCGCCCAGCCCAACTCAACAGCCCATCACCTTCTGAAAACCCTAGAGT…
431	Chr01	31295521	32085905	ACTACCATTAGTGAGTTAATTTGCATGCATGT	A	31	ATGCTTTTTAAAAAACACATTTTTTAAAAAAACATTATGCATTACATAGATTACTTTTTTAATATAATCTATTCTTATAACCTGAAATGGATGGAGTAGTCTACAGTTGTTATAAAACGGATGGAGTAGTCTATAGTTTCAATGGAGTAGTCTGCAGTTTCAATGGGAGGAATTTTACTGGCCTTGAAATAACCGGTTAGAAATTCTACTCCCTCCATTCGAAAATATAAGGCACAACCACCATTAAACCAAAGACCAAGAAATAATTATTATCATCTTGTAGTTTGCATCATCCTAATAAATATAATGCATGCATCCAATAGGATTAGATAACATGAGAGTGGAGGATTTAAAAAAGTAGTAATTTAATATAGAAGATGTCATAGTTAATTACATGCT…	TTATCCATGCTTTTTAAAAAACACATTTTTAAAAAAAACATTATGCATTACATAGATTACTTTTTTAATATAATCTATTCTTGTAACCTGAAATGGATGGAGTAGTCTACAGTTGTTATAAAACGGATGGAGTAGTCTATAGTTTCAATGGAGTAGTCTGCAGTTTCAATGGGAGGAATTTTACTGGCCTTGAAATAACCGGTTAGAAATTCTACTCCCTCCATTCGAAAATATAAGGCACAACCACCATTAAACCAAAGACCAAGAAATAATTATTATCATCTTGTAGTTTGCATCATCCTAATAAATATAATGCATGTATCCAATAGGATTAGATAACATGAGAGTGAAGGATTTAAAAAAGTAGTAATTTAATATAGAAGATGTCATAGTTAATTG…
432	Chr01	31310229	32100608	T	TATATATATATATATATATATATATATATATATATATATAT	40	ATACTTTCTCCATTCATAGCCACAGTGGGCCTTGATCTTTTCTAATAAAAAGATAATAGTGACCCTAGAAAAAATAATGAAGTGTCTATTTTTTTAGATAATGGAATGAAACATTTCGGTCTTTACTCTGAAGAGCTATAGCTAATTATTACAAAAAGTAGCATACTTAAAAGGACGTAGTCCAAAATAAAGCTAGCGAACCAACCAAAATTCAAAGAAGACACATGACAAGAAAAACATTATTCTGGTCTATTGGTGAATCTCCATCCATGGTTGGCGAAAAGTTGCATAACTGTTATGAAAATAGATGCACAACGGAGACACGAATTTTTACGTGGAAAACCCTTGCGGGAAAAAACCACGAGCGCCGACCAGCAATAATCACTATAGAGGGGATAC…	TTTCTCCATTCATAGCCACAGTGGACCTTGATCTTTTCTAATAAAAAGATAATAGTGACCCTAGAAAAAATAATGAAGTGTCTAATTTTTTTAGATAATGGAATGAAACATTTCGGTCTTTACTCTGAAGAGCTATAGCTAATTATTACAAAAACTAGCATACTTAAAAGGACGTAGTCCAAAATAAAGCTAGCGAACCAACCAAAATTCAAAGAAGACCTAACATGACAAGAAAAACATTATTCTGGTTTATTGGTGAATCTCCATCCATGGTTGACGAAAAGTTGCATAACTGTTATGAAAATAGATGCACAACGGAGACACGAATTTTTACGTGGAAAACCCTTGCGGGAAAAAACCACGAGCGCCGACCAGCAATAATCACTATAGAGGAGATAC…
433	Chr01	31356488	32146751	C	CCTCCATGCGTGCGGCCGCGCCGCCACCCGT	30	CTTTAGTCCCGGTTTTCTAACCGGGACTACGAATCCGGGACTAAAGATCGCTATTTTTAGTCCCGGTTCAAAATCGATCTTTACTCCCGGTTGGTAACACCAACCGGAAGTAGAGAGGGGGAACCAACCGGGACTAAAGAGGGGAAGCGACAGTTCCTCGAGATTTTTTTTATTATTATTTTGTTGTTGATTTGCTAATGGCTAGTGTTAATCTATATATTTTCTCCCGAATTGAATGAGATGCACATCCTAAATCAACATCACAAATCAAATACATCACAAATTCTAAAAACTACACACAAATTAAATACATCACAGATTATACAAATTATACATCTTAGATCCATGCGATGCAATGAATCACAAAATTATACATCCAGTGAAACACAACTTACAAAA…	TTTAGTCCCGGTTTTCCAACTGGGACTACGAATCCGGGACTAAAGATCACTATTTTTAGTCCCGGTTCAAAATCGATCTTTAGTCCCGGTTAGTAACACCAACCGGAAGTAAAGAGGGGGAACCAACCGGGACTAAAGAGGGGAAGCGACAGTTCCTCGAGATTTTTTTTATTATTATTTTATTGTTGATTTGCTAATGGCTAGTGTTAATCTATGTATTTTCTCCCGAATCGAATGAGATGCACATCCCAAATCAACATCACAAATCAAATACATCACAAATTCTAAAAACTACACACAAATTAAATACATCACAGATTATACAAATTATACATCTTAGATCCATGCGATGCAATGAATCACAAAATTATACATCCAGTGAAACACAACTTACAAAAA…
434	Chr01	31358236	32148555	GACTAAAGATCATATCTTTAGTATCTTTAGTCCT	G	33	TGATTCACCACCTATCTCGGCGACCCATCTGCCACCCTAGCCTCCCTCTAATAACTGGTGAATTTCTGGTCTAATCATATCCACACCCAACCGCAATACCACATACCTTGATCCCCCTAACCCAACTATTAAAACATGCATAAATTCACTTCATCCAAGATCAAGAGGTTCATTGGTTTTCGTTGGCAAGACTAAACTGTAAAGATGACTAGTAAAAGGAACATAATACACTGCAATGGTAAAGGAAAACCGAATCATAAAGATCACTACTGGAGAAGAGGTCTTTGGAGGGTCGGCCGATTTCCACAATAGTCCCGGTTCCAAAACGAACCGGGACTAAAGTGGCTTATTAGTCCCGGTTTATTACTTCAACGGGACGAAGGGATCTTTAGTCCCGGT…	TCCAGTATCTGTTTGTTGTTGATTCACCACCTATCTCGGCGACCCATCTGCCACCCTAGCCTCCCTCTAATAACTGGTGAATTTCTGGTCTTTTCTTATCCACACCCATCCCCTCCCACCTTGATCCTAACCCTACTCTTTATATCCTAACTATTGACTTCATCAAGGTCAAGGGCGTTGTTGGTTAGTCTCTTGGCTAACAAACTGAGAGATGAGTAGCGAAGGGACGTAATCCATCAAGGTAAAGGAAAACCGAATCATAAAGATCACTACTGGAGAAGAGGTCTTTGGAGGATCGGCCGATTTCCACAATAGTCCCGGTTCCAAAACGAACCGGGACTAAAGTGGCTTATTAGTCCCGGTTTATTACTTCAACGGGACGAAGGGATCTTTAGTCCC…
435	Chr01	31371781	32158784	TGCCTCGTCGATCCCGGCCGTCGCCGCATGGATCCGCGTCC	T	40	CGGCAGCGAGGGCGGAGGGCGCTCGGCTAGGCGCGGCTCACGCGCACGCGTGCGCAGCGCACGGGCAGAGCGGGGGAGAGGAAGAGAGAGAGAGAGATGGGGAGGGAGGGGGAGATGGGCCGAGAGGGATTCGGCCCATCGAACCCGAGGGAGGCGAATCAGACTTTTGCGGAGAGATTTGATTTGGGAAGGATTTGGATTCGGGATTGAACTTGATGATAGATCGAGGATTTGAGATATGAGATGGCACGGACACTAGGCAACAAGCAGGGAAACGGATTTCGCAAATAGAGTTTTTAAGAGATAGTTTTCCCGCTAGGCGCCACGACGGAACGGGCGCTACAGCTCGCCATCAACTCGAGCTCCCGCGCCATTGCCATCATAGTCGAGGTCGAGGTC…	GCAACCGATTCGCGCACAAGGGGCCCAGGGCCAGGGCCGCTGCGCCGCCTGAGCCTGCGCAAGCTATATGTGGGCCATGTATTGAGTGGGCTAAAAAGGTTCCCGGTCTCTTGCGTAGCTCCACCAAGTGAGATTTAGGGCATGCCCAAGGCTCCACCCTCGAGCAAGATCTCACACCTCCCAAAGCGAATATTCGCGCCACGTCGGAAGGAGCCGCGTCCCTGCAGGGGTGCATGAATGCTATAGGAGGTCTGCACACCCTTGTCAGAGGTATCACACTTTTGACCGGAAGAATCGACGAGGATGCGCGTTGGGTAGCTGTGTCGCCCCATGCTATCGCTTCAGCTCGCCATCAACTCGAGCTCCCGCGCCATTGCCATCATAGTCGAGGTCGAGGTC…
436	Chr01	31425885	32217936	A	AGCAGCTACTTCTTGTAATTTTAAGCTTCCAAATTGACCCTCG	42	GGTCGGCCGGGTACCGCGTCACCGCGCCGGACCTCGGCGCGTCGGGCGTCGACCCGCGGCCGCTGCGCGAGGTGCCGACGTTCCGCGACTACACCGCGCCGCTGCTGGGCCTCCTCGGCTCCCTCCCTCCAGGGGAGAAGGTGGTCCTCGTCGGCCACAGCCTCGGCGGCATCAACGTCGCGCTGGCCGCCGAGCTGTTCCCGGACAAGATCGCCGCCGCCGTGTTCCTCTGCGCCTTCATGCCGGACCACACGTCCCGGCCGTCGCACGTGCTCGAAAAGGTGAGTCCATTCTTTTTTTTTTTGCCTATCAAATAGCTGCTTAATTTATTTCTCCTGCTAAGATTTGCTGATCAGCCGAGGGGCTCTCGAAATGCTAGCTCAGGGCTTGTTTGGGGAG…	GGCGTCGACCCGCGGCCGCTGCGCGAGGTGCCGACGTTCCGCGACTACACCGCGCCGCTGCTGGGCCTCCTCGGCTCCCTCCCTCCAGGGGAGAAGGTGGTCCTCGTCGGCCACAGCCTCGGCGGCATCAACGTCGCGCTGGCCGCCGAGCTGTTCCCGGACAAGATCGCCGCCGCCGTGTTCCTCTGCGCCTTCATGCCGGACCACACGTCCCGGCCGTCGCACGTGCTCGAAAAGGTGAGTCCATTCTTTTTTTTTTTGCCTATCAAATAGCTGCTTAATTTATTTCTCCTGCTAAGATTTGCTGATCAGCCGAGGGGCTCTCGAAATGCTAGCTCAGGGCTTGTTTGGAGAGATTCTACCAGCTGTATAGCTTCTTATAGAATTTTCAGTTGCCAG…
437	Chr01	31479815	32267998	C	CCAATATTCGTGAAACCGCTAATTTTCGTGAAAC	33	GATCGTGATGTGGAGTGGAAGATGGAAGCGCTGACGGAGGGAGGAGACGACTCCGAGTCTTGGACTAGTTCGTTCCACTTCAGTCCCAGGGAGTGCCACGGTGGTGAACTGGTGAAGTGCCGGAGTGGGAGTGGGGATAAAAGTGACAGTCTCATTGGCGCCACATACCTTCATAGCGAGGTTATTTTAGGAGGATGTTAGTACTGTACAGCTAGCCAATCTGACAAACGAGATTGGATCTGATTTGTTCTGATCTTCCTACAGCCTACCACATCGATGGGCATGTTTGTGGAGTGGTGAGTAGGATGTAGTGTATCGTTCCACTTCAGTGATATGCATACCGCATAGTGCAGACTTTCAAAGTTTCAACTAGGATCCTTGCAAGTTGTTCAGATGAGT…	ATCGTGATGTGGAGTGGAAGATGGAAGCGCTGACGGAGGGAGGAGACGACTCCGAGTCTTGGACTAGTTCGTTCCACTTCAGTCCCAGGGAGTGCCACGGTGGTGAACTGGTGAAGTGCCGGAGTGGGAGTGGGGATAAAAGTGACAATCTCATTGGCGCCACATACCTTCATAGCGAGGTTATTTTAGGAGGATGTTAGTACTGTACAGCTAGCCAATCTGACAAACGAGATTGGATCTGATTAGTTCTGATCTTCCTACAGCCTACCACATCGATGGGCATGTTTGTGGAGTGGTGAGTAGGATGTAGTGTATCGTTCCACTTCAGTGATATGCATACCGCATAGTGCAGACTTTCAAAGTTTCAACTAGGATCCTTGCAAGTTGTTCAGATGAGTC…
438	Chr01	31484951	32273168	T	TAGCTGCAGCCTTAAATGCAGCAAATCTGCATCCGAACATATCTCTGCAGCA	51	GCCGTTCGATCAGATGTATATTTATTGTACTGCATTAAAGGGTGATAGACGTTGTAGTGTTGGGTGTCCGCTAAAATTGCTAAATCGTGGAGCGTTATCAGATATGTTTGCATTAGTTGCATGGAGCCGAAGCACACACATCATGCGCGTCCGTAGCATCGAAATCATTTATCAATTTGCAAGCGACGTTGGGCTGCCAGGATGACACAGGGGGCACAGGGCCACTTCATTTATGAGTCACACCTGACAATTGTGCGCAATTTTGTACTGGCTCTCCTTCTCCCCACCTTGACCATGGAGAACCACAGATGCATATCTCCAATCCCATCTGTTGATGCATACTTTTGACGCTATGGCTAGATAGCTTACGTCGTTTCTATCTCTAAGCTTGATCTCTCT…	GCCGTTCGATCAGATGTATATTTATTGTACTGCATTAAAGGGTGATAGACGTTGTAGTGTTAGGTGTCCGCTAAAATTGCTAAATCGTGGAGCGTTATCAGATATGTTTGCATTAGTTGCATGGAGCCGAAGCACACACATCATGCGCGTCCGTAGCATCGAAATCATTTATCAATTTGCAAGCGACGTTGGGCTGCCAGGATGACACAGGGGGCACAGGGCCACTTCATTTATGAGTCACACCTGACAATTGTGCGCAATTTTGTACTGGCTCTCCTTCTCCCCACCTTGACCATGGAGAACCACAGATGCATATCTCCAATCCCATCTGTTGATGCATACTTTTGACGCTATGGCTAGATAGCTTACGTCGTTTCTATCTCTAAGCTTGATCTCTCT…
439	Chr01	31490031	32278150	T	TTATTATTATTATTATTATTATTATTATTATTATTAT	36	ATAACCAACGAACAAAGGTGAATGTTATTTTTGGCATGTTATAGATGCCTTGTACATTATCAGTTTCTGATGGCTTTTAAATTATTTGTTTTTTTTTTTCAGTTCAATGTGCCGGAGTATTATGTTTTAGCTCTCTGACTGACTATAATTTGTAGAATGAATTGTGAATCTAGCACTGAGAGTATCTTGTTTCTTTTAATCAGAATGATGGGGAGCAGAGAATGAGTATTCCAGCAAGAGAATTATTTGCAGCAATTGAGGCCGACTCAGGCTTGTTGCCTGTGAACAGTAGCAACACTAATGAAAAAAGGAAGAGGCGTCTACAGAGGCTCACTGGCAAACAGTCGGAGGTACTTGAGGGGTATGTTTCTTGAAGCACATATCATCATTTATTGAAAG…	TATAACCAACGAACAAAGGTGAATGTTATTTTTGGCATGTTATAGATGCCTTGTACATTATCAGTTTCTGATGGCTTTTAAATTATTTGTTTTTTTTTTTCAGTTCAATGTGCCGGAGTATATGTTTTAGCTCTCTGACTGACTATAATTTGTAGAATGAATTGTGAATCTAGCACTGAGAGTATCTTGTTTCTTTTAATCAGAATGATGGGGAGCAGAGCATGAGTATTCCAGCAAGAGAATTATTTGCAGCAATTGAGGCCGACTCAGGCTTGTTGCCTGTGAACAGTAGCAACACTAATGAAAAAAGGAAGAGGCGTCTACAGAGGCTCACTGGCAAACAGTCGGAGGTACTTGAGGGGTATGTTTCTTGAAGCACATATCATCATTTATTGAAAG…
440	Chr01	31494166	32282263	CAAAACTTCATTCTCTTTTAGTTTGAAGAGTAAAAAGGA	C	38	GAAAAGGGAGGTCCGTGTGCAGATAAAAATCAAGAACATGCGAAGGGGATTCATCGGCTCCGATCACCCTGCATCTCCCAGAATTTGCTGAATTAATTAGAACTTTAAGGTTGTGTTAACAACCTGTAATAATGTTTTTAAGGCCAAACTTATATCGTGTCTTTGCTGTAATAATGTAGTATGCGCCTGATGGATGTCGACTGCCGTGTACCGATGCAGTTTGCTTCGCAGAGACGCGGATACATTTGCTATCGTATGGATGCTCCTTTAGAACCTATGTTGCCTCTTAATTTCTATGGGTGCTATTTTAGAACATCGATGTGCAGTTTTCTTTGCAGATTTGGTATTCTATGGATGCTCTTTTAGAACTTAAATTGCCTCTTCAATTACCTCCATTTG…	CTTATTCCTGATATATGCTAGTGTTGCTGATGAGCTCTCGTCTGTTTTGTACAGGGAGAAAAGGGAGGTCCGTGTGCAGATAAAAATCAAGAACATGCGAAGGGGATTCATCGGCTCCGATCACCCTGCATCTCCCAGAATTTGCTGAATTAATAAGAACTTTAAGGTTGTGTTAACAACCTGTAATAATGTTTTTAAGGCCAAACTTATATCGTGTCTTTGCTGTAATAATGTAGTATGCGCCTGCTGGATGTCGACTGCCATGTACCCATGCAGTTTGCTTCGCAGAGACGCCGATACATTTGCTATCGTATGGATGCTACTTTAGAACCTATGTTGCCTCTTAATTTCTATGGGTGCTATTTTAGAACATCGATGTGCAGTTTTCTTTGCAGATTT…
441	Chr01	31619438	32332487	G	GGGGATGGAGGGAGGGGAAAGGGGTGGGGGAGGGGGAGAAAGCGGCGACA	49	ATTTACACTACTACAAAAGATGTCGTAGGTTCTGGTTTGTAAGGGTCCATATGTGTTGGATTTTCATCCAGCACCAATAGAAGCTACCGACACCTATGAGGAAAATAGAACCGACAACTTTAGGTTCGCATGAGCCCAAAAAAAAAAAAAGTCAGCCAGCTCAAATCGAGCTGAACTCACCAACCATGTTGCCGTCGTTGTCATCCTGCTCTATCCGCTATCTTCAACTACTATCATCATCCTGTTGTATCCGCCATCTTCATCCGGCATCGTCTCCGTCAAAGCCCAGTCCCGCCGCCACCGTCTCCCACCTATCGGATCCGAAGACAAAAACGAAGAGGCCGAGGGGCAGAGGGAGAGAGGGGCGCACTGCTGTCGTTGCGTCGTTGCTGCCATCAT…	TACAATCAAAAGATTTACACTACTGTCGTAGGTACTGGTTTGTAAGGGTCCATATGTGTTGGATTTTCATCCAACACCAATAGAAACTACCGACACCTATGAGGAAAATAGAACCGACAACTTTAGGTTCGCATGAGCCCAAAAAAAAAAGTCAGCCAGCTCAAATCGAGCTGAACTCACCAACCATGTTGCCATCGTTGTCATCCCACTCTATCCGCTATCTTCAACTACTATCATCATCCTGTTGTATCCGCCATCTTCATCCGGCATCGTCTCCGTCAAAGCCCAGTCCCGCCGCCACCGTCTCCCACCTATCGGATCCGAAGACAAAAACGAAGAGGCCGAGGGGCAGAGGGAGAGAGGGGCGCACTACTGTCGTTGCGTCGTTGCTGCCATCAT…
442	Chr01	31619442	32332540	A	ATGGGGGAGGGGATAAAGCAGTGTCGCCAAAGCGGCGA	37	ACACTACTACAAAAGATGTCGTAGGTTCTGGTTTGTAAGGGTCCATATGTGTTGGATTTTCATCCAGCACCAATAGAAGCTACCGACACCTATGAGGAAAATAGAACCGACAACTTTAGGTTCGCATGAGCCCAAAAAAAAAAAAAGTCAGCCAGCTCAAATCGAGCTGAACTCACCAACCATGTTGCCGTCGTTGTCATCCTGCTCTATCCGCTATCTTCAACTACTATCATCATCCTGTTGTATCCGCCATCTTCATCCGGCATCGTCTCCGTCAAAGCCCAGTCCCGCCGCCACCGTCTCCCACCTATCGGATCCGAAGACAAAAACGAAGAGGCCGAGGGGCAGAGGGAGAGAGGGGCGCACTGCTGTCGTTGCGTCGTTGCTGCCATCATTGTG…	ATGTGTTGGATTTTCATCCAACACCAATAGAAACTACCGACACCTATGAGGAAAATAGAACCGACAACTTTAGGTTCGCATGAGCCCAAAAAAAAAAGTCAGCCAGCTCAAATCGAGCTGAACTCACCAACCATGTTGCCATCGTTGTCATCCCACTCTATCCGCTATCTTCAACTACTATCATCATCCTGTTGTATCCGCCATCTTCATCCGGCATCGTCTCCGTCAAAGCCCAGTCCCGCCGCCACCGTCTCCCACCTATCGGATCCGAAGACAAAAACGAAGAGGCCGAGGGGCAGAGGGAGAGAGGGGCGCACTACTGTCGTTGCGTCGTTGCTGCCATCATTGTGTCGTGCCCCAGCCATCGCTGCGCCGTGCCGTGCCCCGCCATCGCAATGT…
443	Chr01	31928070	32372618	TTCCGATCTCATTGGGAGAGACGATATTGGCTTTGTCT	T	37	TATTTAATATTGTAAAATAAATATTAAAAATGAACAAATAATGTCTTTTAGATTTTCTATCTTTTCAGATGACTAGATGGCGCCTCTAACCTTCATCTTCCACGTGGCGGTTCCCCATAGGCTCTCAATGACGGTTGCAAGTGAATCGACGTTGGAAACCGCCATATCCAATCGTCATTGGGCACTATATAAGGAGGAGAAGCTTTCTTGACTTCCCTGATTTTTAGAATCTTATTCTCCCCAAACAGGACCCAAGGCGATTGAGAAGTCATTGAGCATGGAGAAAGTCAACTATGTCGTTGACTACTAAAAGAGGCCATTTCAGGCTGACTCCAAGTGTGAAACTAAACTTTTACAGAAACTTCCATGAAAAAATTTTATGTGTGTTTTTGAATTATC…	ATATTTAATATTGTAAAATAAATACTAAAAATGAATAAATAATGTCTTTTAGATTTTCTATCTTTTCAGATGACTAGATGGCGCCTCTAACCTTCATCTTCCACGTGGCGGTTCCCCATAGGCTCTCAATGACGGTTGCAAGTGAACCGACGTTGGAAACTGCCATATCCAATCGTCATTGGGCACTATATAAGGAGGAGAAGCTTTCTTGACTTCCCTGATTTTTAGAATCTTATTCTCCCCAAACAAGACCCAAGGCGATTGAGAAGTCATTGAGCATGGAGAAAGTCAACTATGTCGTTGACTACTAAAAGAGGCCATTTCAGGCTGACTCCAAGTGTGAAACTAAACTTTTACAGAAACTTCCATGAAAGAATTTTATGTGTGTTTTTGAATTAT…
444	Chr01	31979858	32428029	C	CTCTCTCGTTTTTCTCGTGCACACATTTTACGAAAAGTTTATATATAAAAGTTGCT	55	TGAAATGGCTCGCTGTGCTTGCGCGTTTGTATACATGCATTCCATTCAACTTCATATTCTTGCCTGCTAAACATCTCTGAGTGTCTAGCCTTCACTAACCTCGGAACCAGTTTCTACAGCGGATTTATGTATCAGGATGTATAAAACCAACCGTGCTATCTAGGGTAAAAGTTCCCTACTTCATCCATCTCAGAAGAAGATATCTTTTGTATATAAATCTATACATAACATTCCAGAACAAGATAACTTTTATATATAAATATGGGACATACGACACTAAATTCATAGGATTTTAAAAGTTCCATTCTTTCAATCGATAGGATATTATAGGAATAAAATCCTAATGAAACTTTTTGGAAGAGAGAGCTGTAGTACTATAGACTACTTGTAACTACGCTC…	TGAAATGGCTCGCTGTGCTTGCGCGTTTGTATACATGCATTCCATTCAACTTCATATTCTTGCCTGCTAAACATCTCTGAGTGTCTAGCCTTCACTAACCTCGGAACCAGTTTCTACAGCGGATTTATGTATCAGGATGTATAAAACCAACCGTGCTATCTAGGGTAAAAGTTCCCTACTTCATCCATCTCAGAAGAAGATATCTTTTGTATATAAATCTATACATAACATTCCAGAACAAGATAACTTTTATATATAAATATGGGGCATACGACACTAAATTCATAGGATTTTAAAAGTTCCATTCTTTCAGTCGATAGGATATTATAGGAATAAAATCCTAATGAAACTTTTTGGAAGAGAGAGCTGTAGTACTATAGACTACTTGTAACTACGCTC…
445	Chr01	31995493	20570393	CGAGTCCGATCCGTTTTCTTAGCTTCTTTCCCGGTGC	G	36	CATTGACCCGTTATCTTCCTGACAGGCAACAGTTATCCACTTATCCTCCCAAGTTCCAAAATGATAAAGAGTATATATACTCCCGACGACGGGCCCATATAACTGGCCGGATCCACCTAGTGCCATTAATTTGCCTGAAGTCGCCGTCTTACATATATTTTGTTTAGTATCTATGTATTCAGAAATCTGTTAGAATAATTGGGCTAGGCCCAACTTATAATATTAAATCTCAAAGGCCCATAATAATTGTTGAGGATAATAATACCACCTCAGGATTTAAGCGAGAAATATCTCAACCTAAATAGGGAGTTATTGGAGGCTCCCTGTTGACCAGTTGAGGTAGGGGTCGGAATGCCACGCGCGCGCGCGCGCGCCGGGCCGTGGGCGAGGTCGCGGCGC…	ACGCGATAACATGCTAGAGGCATCATGTAGAACAGGAACAAGAACATAGCGCACATAATATAGCGATAGCGCTAACAATGGGAACAGGAATAGCGCTAACAACAGTAGCAGGAGGAGAAGATTATACCCCGAGAATGGCCCTCCGCTGGATGGTGAGGCAGAATTGCCTCCGTTGTTGTTGTCGTTCACGGCACCTCCTGGCGCACCAACTCCAGATCCAGATCCAGCTCCTGTCGGCGGCGGCGGCGTACCACCTCCGCCAGCAGTGGCGGCGGCAACTCCAGACATGGCGATGAGCAGTCGTGCGGGAGGCACTCCCCAAAAACCTGATCACCCGCCTACCCGGTGCAGATCTCAGGCGAAGGTGTGGTTTCAGAGGCACTGCTCCTTCCAATCTCT…
446	Chr01	32099918	32702395	CACGGCGCGGCGGGGAGGCGGCGGCGAGGGA	C	30	GAAAAAGTTAGGAACTAAACTAAACCAGGCCATAGTTTGACGGTCTCATGGAATGGAAACAGTGTTTTTATTTTTCTTTTTCTTTAGGAACCGCGAGCCCGTCAACTTTATTGAATAAAGCATAATAAACAATGTAATTGTTGCCTAAAACATGCATTTTCTGGTAGTCTGAAGTGGATTTTTTTGGGACAATTGCATACGTGCCCTTACTTTAAAAGCCAATTGCTATTTTGCCCTCACTTTTTAGGGTTTGCAATTTTACCCCCACTTTTTTAATCTGAAGCAGCCGTCTACCCTCACTTGTGACAGCCGTTTGGTGGGTCCCACGTTGTGTGTTAAAGAAATACAAAAGGAAATAAAAAAAGGTTTTAGGAATTATGAAATGACATTTGTACCCTG…	TTTGAAGAAAAAGTTAGGAACTAAACCAGTCCATAGTTTGACGGTCTCATGGAATGGAAACAGTGTTTTTATTTTTCTTTTTCTTTAGGAACCGCGAGCCCGTCAACTTTATTGAATAAAGCATAATAAACAATGTAATTGTTGCCTAAAACATGTATTTTCTGGTAGTCTGAAGTGGATTTTTTTGGACAATTACATATGTGCCCCTACTTTAAAAGCCAATTGCTATTTTGCCCTCACTTTTTAGGGTTTGTAATTTTATCTCCACTTTTTTAATCTGAAGCAGCCGTCTACCCTCACTTGTGACAGCCGTTTGGTGGGTCCCACATTGTGTGTTAAAGAAATACAAAAGGAAATAAAAAAAGGTTTTAGGAATTATGAAATGACATTTGTACCCTG…
447	Chr01	32124075	32726446	GCGCGAGAGGCGCGGCTGATGGAGGGAGGCCAGAT	G	34	CGGCTGGCGACGGCAGCGATGGTGGTGGTCGCGGCAGTTGGCAGCGACGATGTCGGCTGACGACGCCGATAGAGGACTTGACGGCGATGTGGCAGACGGCGACAGCGAAGCGGCCGCTGGCAATGGCGGCTGTTCGCGGAGGCGGTGGCAGCGGCGATAGCGGTTGACTTGCGACGGCTGTGACTATGGAGGCGCTGGCGATGTCGGCGGATGTGGGTCGCTGGTGGCAGCAAGTGGAGGTGCGCGGTGAGGATGGCGACGGCGAGGTGGCTAGGCGTTCAACAGTAGCGGCTGTGGTGGTGGTGGCCGTGATCGCGGTCACCGGAAGCATGGCGGCCTCAGACGGCTAGCCGAGGGAGTGGGAGACGGCTACATTTGGCCGGCGCGGCATCGTCTGGT…	CCAAGTCTTGGCTTCCGTTTCCCTTTTGTAATGCAGTTGTGAGCTCGGTATCTGTCCGCAGCCCAACATGACTGTACCTCTACTCTATAGTAAAGAGACCTCTGTTGCTGTGATAATCCGTCTTCCTGCGATACCAGCACTGTTTCTTGGGACTGGTATCGATTAACAGGTTAATTTGGAGCGTCACGGGCTAGTTCCGGTCGGTACTAGTTCGGGGCGTGACATGGCAGCAAGTGGAGGTGCGCAGTGAGGATGGCAATGGCGAGGTGGCTAGGCGTTCAACAGTAGCGGCTGTGGTGGTGGTGGCCGTGATCGCGGTCACCGGAAGCATGGCGGCCTCAGACGGCTAGCCGAGGGAGTGGGAGACGGCTACATTTGGCCGGCGCGGCATCGTCTGGT…
448	Chr01	32163191	32771803	TAAGTATAAAAGTGATGGCTGAGATGTGGAGGGG	T	33	TTTCACCGGGGATGACCACTAACGTGGCACTCCATGTAGGCATAACTTTTGCACTCAGCCCCCTCCGCGTCTCGGCGTGACAGTAATGTTGTAATTAGCCCTTGTTGCTATAGTGCCATCCCGAAATCCACAAAATCCCTCTGCCCCTCCCATTTCCCCCAATACGACGCTTTTGGGGGAGGGAGAGGCGAGTGGGTGACACTGGGGATCGTCGGCAGTGTGAGCTGATTTGGGCCCAATTTGAGCTGTGCGAGTAGTTGCACTTGATAGGTTGTGCGCTGTGCAGATCCCTTGTCGGCGCGAATCCACACTTCGTCCCCTACCACCGCTACCTCATTGTCTCCCACCACCTTCAAATGCTGTCCTCATTGTCGCAACCCTAGCCATCGGGTGGAATGG…	TTTCACCGGGGATGACCACTAACGTGGCACTCCATGTAGGCATAACTTTTGCACTTAGCCCCCTCCGCGTCTCGGCGTGACAGTAATGTTGTAATTAGCCCTTGTTGCTATAGTGCCATCCCGAAATCCACAAAATCCCTCTGCCCCTCCCATTTCCCCCAATACGACGCTTTTGGGGGAGGGAGAGGCGAGTGGGTGACACTGGGGATCGTCGGCAGTGTGAGCTGATTTGGGCCCAATTTGAGCTGTGCGAGTAGTTGCACTTGATAGGTTGTGCGCTGTGCAGATCCCTTGTCGGCGCGAATCCACACTTCGTCCCCTACCACCGCTACCTCATTGTCTCCCACCACCTTCAAATGCTGTCCTCATTGTCGCAACCCTAGCCATCGGGTGGAATGG…
449	Chr01	32218494	32820849	C	CATCCTCACTATGTAACGTAGTCCCTCCGTCTAA	33	CTAATATGACTCTAACTATCATATACTCTAACAGATCGATCGATGGGTGGAGACGGGGAAAGGTTCATGGCGCTGCGCTGTCTTCGCATCGGCGATTCGGTGCGGCGTTCGTTTGCTACATCCTACTCTACTAAAATTCAAGGTTCCTAAGTTAGGTCGAATAATAATGAGGGAGTGCGCGAACTGCGAGTGCTGCTCCGAATCTAAGAGCTGTGTTGCGAAAGGTATACGTGAAAAACATGGACATCGATTGTACTACTATTGTAAAATGGAAAGGAGATTCCCGGGGGTTCCCTTTTGACATTTCAGCCGAGCGACGAGCCTATGTAAGCCTGACAAGGAAATTGTAGTGTTTTCTCCGGTGCGTGCAATGCAAAGTGGGGTTCAAAAGCGAGGAAA…	CCCCCGGTCTTAGCGGCGTTGGCCGTTTGCACGCCATCCATCCGATCATCCGCCACATCAGTGCGGCGGCACACACCCTCCCTCCCCGCGTGCGGCGACAGCGAAGGGCTTCGATTCCGTTGGGCGTTCAGCCGTTTGGGCCACCAAGCGCAGCGGGCCACGCAAATATACTCTAACATAGCCTTAGGGGGCCGGTATACATAGAAGTACACGAGGAGGAGATAAGGAAGGATTACAGATATGAAAGGAGTCTACATAAATCAGTCTTATTCTAATATGACTATAACTATCATATACTCTAACAGATCGATCGATGGGTGGAGACGGGGAAAAGTTCATGGCGCTGCGCTGTCTTCGCATCGGCGATTCGGTGCGGCGTTCGTTTGCTACATCCTACTC…
450	Chr01	32243398	32885669	GTCTATATATATATATATATATATATATATATATATATATATATATATATATATA	G	54	GAAGGGGAAGAAATCTAAAGGAGATTGAAGTACTAAGGCCATATTTACATCATTCTAAAAAATTTTCACCCCTGTCACATCGAACGTTTAAATACTTGTATAAAGTATTAAATATAGGCTAAAATAATAATTAATTATACAGATTGTGACTAATTTACGAGACAAATCTTTTAACCCAATTACTCCATGATTTAACAATGTGGTGCTACAGTAAACATTCGCTAATGACGGATTAATTAAGCTTAATAAATTCGTCTCGTGGTTTACTGACGGATTATGTAATTAGTTTTTTTATTAGTGCCCGAACATCCTATGCGACACCCTATATAATACCCGATGTGACACGCCAAAATTTTATACCCCTGGATCTAAACATCCCCTAATTGTTCTACCGAACTC…	GAAGGGGAAGAAATCTAAAGGAGATTGAAGTACTAAGGCCATATTTAGATCATTCTAAAAAATTTTCACCCCTGTCACATCGAACATTTAAATACTTGTATAAAGTATTAAATATAGGCTAAAATAATAATTAATTATGCAGATTGTAACTAATTTGCGAGACAAATCTTTTAACCCAATTACTCCATGATTTAACAATATGGTGCTACAGTAAACATTCGCTAATGACGGATTAATTAAGCTTAATAAATCCGTCTCGTGGTTTACTGACGGATTATGTAATTAGTTTTTTTATTAGTGCCCGAACATCCTATGCGACACCCTATATAATACCCGATGTGACACGCCAAAATTTTACACCCCTGAATCTAAACATCCCCTAATTGTTCTACCGAACTC…
451	Chr01	32264542	32906858	CTAGTACATATTCCCTTCGTCTCAAAAAAAAAAAAACAAACAAACCATGT	C	49	CCACGACGGCGGCAGCAGGACGAAGAGTGCAGGGCCCTCCGCCGCGCCGGCGAGCAAGCGTGGCCAGAAGTGCGTGATCCTGTAATAATTGAGCCAGCACTGAGATTCTCATGAGTCAATGAGCTACACGAATGATGTGTGTTGTTGTAAAATGGCAAAACAATTGTGTGGGCGTGTAGTATGATGCTCCACTGAAAGATCGAGAAATAACACTGGCCAGTGCAAGTTCACAGCCGTAGTCCGTAGTCCGTACGCTGTGGGCCCGTGCCGGCCCATGGGCAACAGACCAAAACTTACTCTTTCTATCCTCGTGTTTCCTAAATTTGGCAGTGCTAAATTTCATAGCAATACTAAAATCAAATTTAGTAAGATTTCAAATGGCAGCAAACGAAACCATCC…	GCACGACGGCGGCAGCAGGACGAAGAGTGCAGGGCCCTCCGCCGCGCCGGCGAGCAAGCGTGGCCAGAAGTGCGTGATCCTGTAATAATTGAGCCAGCACTGAGATTCTCATGAGTCAATGAGCTACACGAATGATGTGTGTTGTTGTAAAATGGCAAAACAATTGTGTGGGCGTGTAGTATGATGCTCCACTGAAAGATCGAGAAATAACACTGGCCAGTGCAAGTTCACAGCCGTAGTCCGTAGTCCGTACGCTGTGGGCCCGTGCCGGCCCATGGGCAACAGACCAAAACTTACTCTTTCTATCCTCGTGTTTCCTAAATTTGGCAGTGCTAAATTTCATAGCAATACTAAAATCAAATTTAGTAAGATTTCAAATGGCAGCAAACGAAACCATCC…
452	Chr01	32366839	33065184	GCATGGCCTTAAATTGCAGTCGATCGATGGC	G	30	CCCCGGGAAGCGACGCACCCGCACGCCCGAGGCGGGCCCCACCTGTCAGCGACCCCGCGAGATCCGCGTGCAGGGCCCCACCTCCGCGTCTCCTATATAATCCCCTCCGCCTCCAAACTCTACCGCCTCTCTCTCTCTCCGGCGTCTGTCCTGACCACCTCGCACGTCCGCCGTCTCCTCCTTCCTCTCTTCGCAATCACAATCCTGAAGAAATTCCGGAACACATCGAGATCGATCGAGGAGAGAACGACGAGCGGTCTCGTCCAGCAAGCTGTGCAAGGTTTGGCTTTAATTTTTTTTCGTTTTTTTTGGTCTCTACCCGCTTCTGATTTTTCTGATCTGATTTGGCGCCGTTTTTTGAACTTTGGGAATGTGGTTATGTACTGCATATGTATATAT…	CTTCCCCGGGAAGCGACGCGCACGCCCGAGGCGGGCCCCACCTGTCAGCGACCCCGCGAGATCCGCGTGCAGGGCCCCACCTCCGCGTCTCCTATATAATCCCCTCCGCCTCCAAACTCTACCGCCTCTCTCTCTCTCCGGCGTCTGTCCTGACCACCTCGCACGTCCGCCGTCTCCTCCTTCCTCTCTTCGCAATCACAATCCTGAAGAAATTCCGGAACACATCGAGATCGATCGAGGAGAGAACGACGAGCGGTCTCGTCCAGCAAGCTGTGCAAGGTTTGGCTTTAATTTTTTTTTCGTTTTTTTTGGTCTCTACCCGCTTCTGATTTTTCTGATCTGATTTGGCGCCGTTTTTTGAACTTTGGGAATGTGGTTATGTACTGCATATGTATATAT…
[truncated: 3,470 more rows]
