# Supplementary material for: Development of Whole-Genome Agarose-Resolvable LInDel Markers in Rice
Source: Rice (N Y). 2020 Jan 6;13:1. doi: 10.1186/s12284-019-0361-3 (PMC6944724; doi:10.1186/s12284-019-0361-3)
Supplement: Supplementary file 4 — Additional file 4. The 1838 unique LInDel markers designed by 30-55 bp LInDels. [file 12284_2019_361_MOESM4_ESM.xlsx]

## Sheet: ZS97 MH63 1838 LInDel markers
InDel NO.	Marker Name	Chromosome	ZS97 Position	MH63 Position	Forward primer	Reverse primer	Forward primer size	Reverse primer size	PRIMER_LEFT_TM	PRIMER_RIGHT_TM	PRIMER_LEFT_GC_PERCENT	PRIMER_RIGHT_GC_PERCENT	PRIMER_PRODUCT_SIZE
1	LInD1-1	Chr01	63771	47425	CTATTGAGGTAGCTCTCTTC	TGTTGTGGATTGTGTAGTAC	20	20	61.826	61.48	54.545	44	300
2	LInD1-2	Chr01	131161	127268	TGTGATGGATTGACACACACAC	TGTTTGCTTTCGCTTCTTGGCT	22	22	60.684	61.844	43.478	45.455	301
3	LInD1-3	Chr01	191159	179845	CGGTGACCCACAGGATCTACTG	ATACGTACAGGGTGGGATTGGC	22	22	62.104	62.133	59.091	54.545	345
4	LInD1-4	Chr01	204478	192975	CGATCACCCTGAAGCAGCTA	TGACGTGGATCCCCTCACAT	20	20	61.849	62.059	54.545	54.545	346
5	LInD1-5	Chr01	282006	254643	TCCTGCTTCATCGACGCATGTA	TCTTTGCCCCTGCTCAGTGTAA	22	22	62.098	61.884	50	50	328
6	LInD1-6	Chr01	292676	265299	ACCAACCAAAATACAGTAAGGACCA	TCCCTACCATACAACTAACACGCA	25	24	60.399	61.596	40	45.833	344
7	LInD1-7	Chr01	309685	280305	GACTCTGCAACCAAACCATGCA	AACAAGACGGTGAACATACGGC	22	22	61.909	61.438	50	50	300
8	LInD1-8	Chr01	357588	328140	CGCCCTTCGACAAAAACAAA	ATGCCATGCTGTAGCCATGA	20	20	61.36	62.145	50	50	327
9	LInD1-9	Chr01	368992	339623	TGTGGTGAGGACTGATGGTCAC	ACAGCCTAAGTGGTGGTGGATC	22	22	61.931	62.009	54.545	54.545	309
10	LInD1-10	Chr01	387708	361891	ACTCGTCAATGGATTGCTGCTT	TCCATTTCCATTTCGACCCCCT	22	22	60.877	61.705	45.455	50	325
11	LInD1-11	Chr01	448245	432462	CCCTCGAACGACTTGAGCTACA	TCGTCGGTTAGTGTTGTGCTCT	22	22	62.024	61.903	54.545	50	302
12	LInD1-12	Chr01	550376	511112	TCTTCAGAAGAAAAGAACACCACCT	GCTTCTGCTTCCTTCTTCGTCA	25	22	60.339	60.868	40	50	349
13	LInD1-13	Chr01	595946	555531	GGCCAGAACTCATCAGTAGCCA	GGTCACCATGCTAGAAAAGGCG	22	22	62.064	61.826	54.545	54.545	300
14	LInD1-14	Chr01	865814	785591	GGCCATCAATGACAAAGGTGGT	TGACGACTCACAGAGCACAACA	22	22	61.41	62.098	50	50	342
15	LInD1-15	Chr01	998906	924559	TGTGCGCCACTTCTTTTAATGCA	CCCTGCAGAGAAATAACGGCAA	23	22	62.102	61.199	43.478	50	320
16	LInD1-16	Chr01	1285306	1244043	AGGGCATGCCTAACAACTCAGA	AAAACGGAGCAACGGATTAGCG	22	22	61.69	62.062	50	50	311
17	LInD1-17	Chr01	1371791	1340925	ACTGCGAGACGAATTTATTAAGCCT	AGCGACAAGTAATATGGGATGGAGA	25	25	60.9	61.454	40	44	332
18	LInD1-18	Chr01	1453345	1414044	TTGCAACGTTTGACCACTCGTC	TAAACTGGTAGCCTTTCGCCGT	22	22	62.121	62.245	50	50	330
19	LInD1-19	Chr01	1545434	1499759	TGGTGATGCGCTAGTATCAC	TACATGTCACATATTACGTC	20	20	61.909	62.025	50	50	301
20	LInD1-20	Chr01	1569784	1523743	GCGTGTATGTGCGGTCATATGG	TCTGACTTTCATCCAAGAACAGCA	22	24	61.991	60.445	54.545	41.667	335
21	LInD1-21	Chr01	1642471	1596402	GTTGTTGTGTGTGAATTGTG	CGGCGCCGTACATACACTATTT	20	22	61.303	61.114	40	50	345
22	LInD1-22	Chr01	2050799	1996901	GAATGATAGTGGCGCAGTGAGC	TCTCTCTCTCGTTCCCCTCCAA	22	22	61.936	61.963	54.545	54.545	335
23	LInD1-23	Chr01	2122714	2076784	TTGGGGTCCTTGTCGTATGC	AAAAGACGACCGACATGGAG	20	20	61.947	61.928	50	50	310
24	LInD1-24	Chr01	2496831	2414016	CTTTGTCTTGAGAGCGAGCTGC	AGGAAGAGGAAAGCAACCGTGA	22	22	62.054	61.875	54.545	50	339
25	LInD1-25	Chr01	2577655	2485362	CTTGGAACGGACGAACCAAAGG	AGGGAGACGGACGAAAAGAAGA	22	22	61.948	61.08	54.545	50	349
26	LInD1-26	Chr01	2679750	2600827	TGTGCACTCAAAATACCCGGTG	GGGCCTAATGCTGACGATAGGT	22	22	61.39	61.932	50	54.545	337
27	LInD1-27	Chr01	2709219	2630151	AGTTCACGTGTTTCAAACGGGG	AGTGAAAAGCCTCCTTGGGGAC	22	22	61.828	62.481	50	54.545	315
28	LInD1-28	Chr01	2735871	2657851	AGGATCTAACCTAGGTGAGC	GATTCAGTGCTAGATTGAGC	20	20	61.985	62.011	54.545	50	325
29	LInD1-29	Chr01	3411199	3337820	ACATGCCAGATAATGTCCCCGT	ACGGACTCTCTTTATTGTCATGCA	22	24	61.821	60.323	50	41.667	340
30	LInD1-30	Chr01	3415476	3346018	AAGCAGAGGTCTAGTGCTGT	ATGCACCACGCTACAGTACC	20	20	62.032	62.059	54.545	50	348
31	LInD1-31	Chr01	3438761	3369561	GGATTGGTCCAGTTGTACCCAT	AGAACAGACGCATAGAGGCCTT	22	22	60.025	61.477	50	50	340
32	LInD1-32	Chr01	3509634	3450257	CCAACTTTCACCAAACTTCTCC	GGGGGAGTTTGATGTGACGGAA	22	22	62.005	62.523	50	54.545	336
33	LInD1-33	Chr01	4502751	4437051	ACCTAATCATATGATGAGTG	ACCTTGCCAGAGTTGCAGTC	20	20	61.866	62.009	47.826	54.545	329
34	LInD1-34	Chr01	4633520	4570562	TTGGGACGGAGAAAGTACTGCA	TGCAGCACGGATTTCAAGACAC	22	22	61.608	61.951	50	50	300
35	LInD1-35	Chr01	5049092	4619746	AGTGAGCATATGGGTACAACAACT	GCTCATCCAATTTGCACCACCA	24	22	60.019	61.985	41.667	50	337
36	LInD1-36	Chr01	5193689	4777580	AGGAGCAAAAGACGCATACC	CTGCTGCCTTGACGTTGATC	20	20	60.29	61.511	45.455	50	338
37	LInD1-37	Chr01	5236177	4820594	CTCGAGTTTTCTTGGCCACGAG	GCGCAAAAATATTGCACGCCAA	22	22	61.744	62.049	54.545	45.455	324
38	LInD1-38	Chr01	5265315	4849654	GCGAATGCACATTTGGCACATG	TACACACCATGGTCTTAGGC	22	20	62.111	62.055	50	54.545	311
39	LInD1-39	Chr01	5283521	4866523	GGCATGTAATGTCCTTTTCGG	TCTTGGACTAATTCGCGAGACG	21	22	61.661	60.477	44	50	303
40	LInD1-40	Chr01	5573082	5197960	CCTTAGACTGAGAATGTGCGGC	GCAAGCACAAAAACACGCTGAC	22	22	61.311	62.156	54.545	50	347
41	LInD1-41	Chr01	5691707	5302500	TCGCAAGCTACTCAAATTCG	AGGGTTTATCGTAGCTGATG	20	20	61.939	61.86	54.545	50	301
42	LInD1-42	Chr01	5776969	5392820	AGGGGCATTTAACAGTGTTACACA	GCTGCACGCAACATGAAATATACG	24	24	60.69	61.583	41.667	45.833	320
43	LInD1-43	Chr01	5805344	5420842	CAAACCTGAAGTCACGTCCATGT	TGAGAGCTAATCTGCGAGACGA	23	22	61.298	61.001	47.826	50	317
44	LInD1-44	Chr01	5842723	5457682	ATGGATGGTCAAAACGCTGAGC	CGCAGACAAGAGTAGCTGTCGT	22	22	61.773	62.573	50	54.545	350
45	LInD1-45	Chr01	5893210	5493404	CCGGGAATTTGGTTTTCGAGGT	TGCCACGAGGAACAGATGAAGT	22	22	61.397	61.931	50	50	312
46	LInD1-46	Chr01	5937829	5520011	GGGGCTAAACTCAAACGATGGC	ACTGACTCCTCCAGTGGTTTGG	22	22	62.088	61.879	54.545	54.545	327
47	LInD1-47	Chr01	6006252	5588710	ACCCAAGCACATTAATTCCA	TCGCTACAGGTTTCAGAGAGA	20	21	60.502	61.289	43.478	45.833	304
48	LInD1-48	Chr01	6116020	5706754	TTGTTACAAACCCCACCTACTTTCT	TGTTGTTGGGGTAAAATCACGAGT	25	24	60.34	60.928	40	41.667	336
49	LInD1-49	Chr01	6155152	5747254	CCATGAGTCTATGGCTGCCTCA	CCGGAGATGCACGAGTCTACTT	22	22	61.872	61.836	54.545	54.545	304
50	LInD1-50	Chr01	6155823	5747884	ACCCTTTGGATTGTTTGCTGAACA	TCTGGACCAATAAACTCGGCAC	24	22	61.662	60.614	41.667	50	343
51	LInD1-51	Chr01	6177835	5767922	CAGGTCGAGTGGTTCCAAAA	TCTCTGATCGACACCAACCGAG	20	22	61.952	61.771	54.545	54.545	321
52	LInD1-52	Chr01	6204504	5790449	GTGGCTGGCACATAAAAGGACA	AGAAAAATGCAAAGCCACGA	22	20	61.399	60.864	50	45.455	311
53	LInD1-53	Chr01	6315506	5989661	AGGTCATTCATGTAGTCGATGTCAA	AGCGTCAACTTTCCAAAACTCCT	25	23	60.105	60.936	40	43.478	333
54	LInD1-54	Chr01	6325048	5999154	CATGGCGCAACAGTAAATCC	TCGATCTGACTGTTGCGACA	20	20	61.778	62.213	50	50	336
55	LInD1-55	Chr01	6336368	6010525	GCTATCAGCTGTTGGTCCCTGA	TCAGCAACATTTGTGTCCTGCG	22	22	62.064	62.205	54.545	50	317
56	LInD1-56	Chr01	6392755	6091003	TTGGTAGCCGATGTACCTGTCG	GTCTCGAGTGTCCAGCAGCT	22	20	62.095	62.028	54.545	54.545	344
57	LInD1-57	Chr01	6432960	6131192	CATGCGATATCAGCGAGCGATC	GCATGTCCTCAAGGGCTTAGGA	22	22	61.906	62.075	54.545	54.545	347
58	LInD1-58	Chr01	6459774	6158274	TAGAAGTAGCACCAGCAGCT	GTGCAGTGCTTGCCTAAGTC	20	20	61.935	62.092	50	50	342
59	LInD1-59	Chr01	7090371	6785901	CGGTTTGACTCGAGTTTGACCG	GGATAAGTTGACCGCCGGAAAC	22	22	61.978	61.819	54.545	54.545	338
60	LInD1-60	Chr01	8321532	8341481	CGCAGCAATTGGGATCACATGA	ATTGGCCCCATAGTGCAGCTTA	22	22	61.837	62.097	50	50	329
61	LInD1-61	Chr01	8411895	8452253	CCCCTAGGTTAGTACTCGCACA	GGATGACGCACCAAAGTATCCG	22	22	60.947	61.624	54.545	54.545	300
62	LInD1-62	Chr01	8513112	8553361	ACGCCTCGCTGCTCGGCTGC	TGGTTTCATCTGACGTGTCG	20	20	62.135	62.09	54.545	54.545	338
63	LInD1-63	Chr01	8736030	8779761	ACAACAAAGCGTACAGACACGT	TCAGGCAAGCTAGCTGAGGTTT	22	22	60.992	61.945	45.455	50	300
64	LInD1-64	Chr01	8785089	8835641	TGGTCAGTCATATCTCGAAGGCC	TGGGTTAAGGGTAGTTGTGCCT	23	22	61.811	61.301	52.174	50	349
65	LInD1-65	Chr01	8785663	8836280	TGATGAAATTGGGACGGAGA	CCAATTTGGTTATTATTCCGGG	20	22	61.605	60.453	45.833	44	343
66	LInD1-66	Chr01	8799333	8849940	ACTGATGGCCTTGCATGAAACG	GCTCCTGTGGTGGGTTTGTTTG	22	22	62.03	62.421	50	54.545	350
67	LInD1-67	Chr01	8810967	8861560	TTTCTATATGGCGGGCCTGGAG	TCAGTGCTCTCCCGGAAATGAA	22	22	61.941	61.678	54.545	50	321
68	LInD1-68	Chr01	9689550	9740139	GGTGACATACTAGCATCGTGCC	ACATATGGCAGTCACGTGCAAC	22	22	61.118	61.761	54.545	50	302
69	LInD1-69	Chr01	10176874	9916450	CTTCAGTTGCATTGATATGG	TTAGCACCGATTAACTCAGC	20	20	62.1	62.001	59.091	50	343
70	LInD1-70	Chr01	11927343	11721558	AGATCAACGATGAGGGACACCG	AATCCATGGGCCCCACATGTTA	22	22	62.104	62.051	54.545	50	344
71	LInD1-71	Chr01	11934297	11728526	TTCAGCAGTGACCAATGATT	AGCAAAAGCATACCTTTCTCG	20	21	60.498	61.976	43.478	47.826	317
72	LInD1-72	Chr01	11952466	11746736	TTCACACCGAAGTTTGGAAG	TCGGTTACCCACGAACATTG	20	20	61.93	62.099	45.833	54.545	322
73	LInD1-73	Chr01	11983763	11766876	CAGTCAGTGCTCCTTAACCGCT	TTTCGGCTTTTCTGGCTTACCC	22	22	62.554	61.397	54.545	50	334
74	LInD1-74	Chr01	12382896	12154692	AGGTTTTCTCCCATCCTTAGGCA	CCATGAAGGGAGGTACCGAAACT	23	23	61.346	61.953	47.826	52.174	335
75	LInD1-75	Chr01	12447102	12219078	AGGCCTCGTTTGAAACAAGG	ACTCAGCCTAGAGTCCCAGA	20	20	60.686	61.705	45.455	54.545	323
76	LInD1-76	Chr01	12591896	12428643	ATTTAGGGCCCGTTCTTCTGGT	TGAGCCTGTCGCCTAAGTTCTT	22	22	61.697	61.67	50	50	339
77	LInD1-77	Chr01	13261943	13142809	CATGCCATGCACGCATTTCAAC	AGCAGCATGTGTATTCATCCCCT	22	23	62.111	62.035	50	47.826	335
78	LInD1-78	Chr01	13312430	13185184	TCCAGCTGATTCTAGTCAGTCTCA	TAGTAACCGTTCCAGGGACAGG	24	22	60.569	61.149	45.833	54.545	336
79	LInD1-79	Chr01	13401457	13332817	GCTCAATGTTGAGGAAGTCC	GACTGGACTAGCCAATGTCC	20	20	62.316	61.907	50	54.545	301
80	LInD1-80	Chr01	13428624	13359236	CGGGCTGTTTTCTTTAGCTGGG	AGATAGAGATTGGACCAGCA	22	20	62.027	60.887	54.545	47.826	334
81	LInD1-81	Chr01	13450004	13380669	GGGCTAAAAGGTGGGGGCTAAT	GGGACTGGAGAATTTGTTGCCG	22	22	62.372	62.027	54.545	54.545	335
82	LInD1-82	Chr01	13754279	13718593	CTGGTGCGCTGGTTTCATTCAT	AACATAACTGATCGATGCGGCC	22	22	62.03	61.379	50	50	304
83	LInD1-83	Chr01	14055813	14012943	TGGGGGCGAAAAGGAGTAAA	GACTTGGCCTAAAGGGAGGAGG	20	22	61.891	62.076	50	59.091	349
84	LInD1-84	Chr01	14267021	14080675	CTGTCACAGGATCCCGTTGT	CGGTACTTCAAAGACAATGG	20	20	61.987	61.364	54.545	47.826	335
85	LInD1-85	Chr01	14314824	14144977	TGACTAGGACATCCTTCCAGGC	TGCTGAGGCAATGACTGTGAGA	22	22	61.22	61.934	54.545	50	312
86	LInD1-86	Chr01	14645664	14563203	ATAACACTAGCCACCCGTCACC	TCGGTAGAACCTTGTGCACCAA	22	22	62.056	62.128	54.545	50	347
87	LInD1-87	Chr01	14708788	14646252	TGGAGCTTAGCTGGTGTGTGTT	TCTCCAGCTCTTCTCTGTGCAC	22	22	62.137	61.981	50	54.545	312
88	LInD1-88	Chr01	14776380	14740678	AATAGATGGGCCAGACAGGTCG	CTATGCTCATTGGCTGCCCATG	22	22	61.869	61.972	54.545	54.545	346
89	LInD1-89	Chr01	14912156	14861137	AACCAATGGAATACACGTCC	ACTTCATAGATCAGATCTGG	20	20	60.942	61.918	47.826	52.174	300
90	LInD1-90	Chr01	14923679	14875611	TCGCAGATTAGGGAAATTTGTTGCA	GGACCCGGTCAGCAGTACTATT	25	22	61.782	61.538	40	54.545	350
91	LInD1-91	Chr01	16412690	16597888	TCTACTGGAGTTCGGGTTCG	GATGGGATGAGTGACACTTG	20	20	62.072	61.788	54.545	45.455	334
92	LInD1-92	Chr01	16617329	16759796	TAGATGTGCTGAGGCTATCCGC	TGGGTTTGATAATGCGTCACCA	22	22	61.977	60.553	54.545	45.455	318
93	LInD1-93	Chr01	17626127	17910456	GACAGGCAAGCTCTCCTAAC	GGAGTGTAGAATAGATTTGC	20	20	61.998	61.512	54.545	47.826	301
94	LInD1-94	Chr01	17766514	18063343	GGAAGATTTGTGTTCCTGCCGG	GCCGGATGACTGGATGAGCTAT	22	22	62.027	61.991	54.545	54.545	320
95	LInD1-95	Chr01	18055484	18348855	ATCATGCGAAGTGAGCGTAGGT	GTTATAGCGACAGGGCTCGACT	22	22	62.104	61.898	50	54.545	310
96	LInD1-96	Chr01	18069499	18362897	GGAAGTGCTTGTGGTCGGAA	GGGGAAAACGCTCCATAAAC	20	20	61.952	61.453	54.545	50	344
97	LInD1-97	Chr01	18089620	18387119	CGGCTACCAGGGAACGTAGAA	TGGGACGAAGGGAGTAGCAATT	21	22	62.041	61.422	54.545	50	345
98	LInD1-98	Chr01	18113191	18391598	TGTCTGAGTGGCATGCTACCAT	TTGACAGGCAGCTTGTTTTGCA	22	22	61.748	62.046	50	45.455	342
99	LInD1-99	Chr01	18142414	18422949	ATGCATCGTACTCTCTCCGTCC	TAGCTTCAGTCGGTACTCGGAC	22	22	61.645	61.255	54.545	54.545	349
100	LInD1-100	Chr01	18188999	18469267	TCCAGTTGCGACCTTATTCC	TCCGCTGCTGTTGCTTTCTT	20	20	61.683	61.844	50	45.455	337
101	LInD1-101	Chr01	18204342	18497385	TTGGTCACCTCCTGTGCTCTTT	GCCAAAGACATAGAATGCCGCT	22	22	61.821	61.581	50	50	337
102	LInD1-102	Chr01	18254130	18547147	GGCTTCTTACCGTGCTTTGCTT	GCGCGTTGCTCTTGTACACTAG	22	22	61.962	62.094	50	54.545	323
103	LInD1-103	Chr01	18265628	18558609	CTGAGCCATCTTTACTCCCGGT	AGACACACACACACACATATGCA	22	23	61.803	60.744	54.545	43.478	308
104	LInD1-104	Chr01	18722702	18994341	GCCACCTGAAAGTAATCAAAGCCA	TGCCACTAAAACCAATAACCAACCA	24	25	61.826	61.395	45.833	40	324
105	LInD1-105	Chr01	18776236	19058491	ATCTGGCTGCTCCTCATCCATG	CCGTCTCACTCTCATCGTCG	22	20	62.206	61.628	54.545	54.545	343
106	LInD1-106	Chr01	18826566	19093609	CCAAGTTATGGCTCCCATCGGA	ACTGCTGTTGAATGGTTCTGCT	22	22	62.137	60.751	54.545	45.455	331
107	LInD1-107	Chr01	18868546	19155942	CCCCCAAACAGTCCAGCTTT	CTGGTCTGCTACATGCCTGCTA	20	22	62.179	62.118	54.545	54.545	347
108	LInD1-108	Chr01	18906824	19211029	TCATATTCAAGGTAGCCCGCGC	CGTGCGGTTTCATGAGACGATT	22	22	63.054	61.804	54.545	50	342
109	LInD1-109	Chr01	18939291	19232900	ACAGCATTCGAACCGGGACTAA	GCTGCTACTGCCCTAATTACGC	22	22	61.989	61.689	50	54.545	328
110	LInD1-110	Chr01	18950066	19243706	AAGCGACTGAAGCCACTTGC	GTAAGTACACACATTTCATC	20	20	61.972	62.446	50	54.545	302
111	LInD1-111	Chr01	19298587	19926902	TCGATCGACAGCAACAGTACGT	TATGCCACACACTTCAGCCGTA	22	22	62.009	61.988	50	50	339
112	LInD1-112	Chr01	19491445	19950778	AGCACAACAATCAACCCAAGCC	CTATGGGGGATGCCAGTCAG	22	20	62.179	62.197	50	59.091	325
113	LInD1-113	Chr01	19497220	19957007	CCTTTGCAGAGGTGGTAGGTGA	TCACCTCGTGGATCATTCACCC	22	22	61.941	62.059	54.545	54.545	310
114	LInD1-114	Chr01	19515136	19975437	GGGGAGGAAGAGGGGAAAGAGA	GAGATTCCCGCGCATACCATG	22	21	62.592	61.533	59.091	57.143	300
115	LInD1-115	Chr01	19551011	20011357	TCCATGTTGTCTTTGTTGCG	ATCCAAATCCCCTTCAGCAC	20	20	61.839	61.712	45.455	50	347
116	LInD1-116	Chr01	19562160	20022552	CAGTCCGACTGTAAATCGCAAGAC	GGGAGAGAGAAGGAGAACAGGC	24	22	61.945	61.798	50	59.091	301
117	LInD1-117	Chr01	19607779	20073690	TGCGAGACGAATCTTTTGAGCC	CGGAGGAGCAAAGGTTAATGGC	22	22	61.498	61.835	50	54.545	345
118	LInD1-118	Chr01	19734612	20294361	CGCTTTGACTTTCTCTTTCGAACG	CAAGGGCTGCAACAGGTCTCTA	24	22	61.119	62.258	45.833	54.545	324
119	LInD1-119	Chr01	19779641	20336288	TCTTGGACATGATTCGGCAGGT	GCCCACATATTTGCCTTGCACT	22	22	62.007	62.052	50	50	319
120	LInD1-120	Chr01	19883206	20588139	GACAAACGTGGCAGATCGATCC	AGTCGAGCTCTTGAGCCTAACC	22	22	61.868	61.785	54.545	54.545	349
121	LInD1-121	Chr01	19885283	20590261	GGACGGAGGGAGTACTTCCTTG	GCCAAGTGTTTGTTGGTAACCG	22	22	61.79	60.797	59.091	50	321
122	LInD1-122	Chr01	19986278	20716586	TTACCCTTGCCTTTCCTTCCACT	AGAAATGCACTATGGTTGGGCG	23	22	61.792	61.524	47.826	50	300
123	LInD1-123	Chr01	20056306	20786595	TCGAGATGTTACTTTGACCAACGA	TCAGATTACTGTCGACCATGCGT	24	23	60.262	61.982	41.667	47.826	338
124	LInD1-124	Chr01	20626863	21603611	ATGCGATCACCTGTGAATCC	CGGAGCCCGTATACCCAATG	20	20	62.041	62.013	57.143	54.545	332
125	LInD1-125	Chr01	20719296	21686702	ACAGTACTCCCTCCGTTTCACA	CCTAAAACCAACAGAGCCAGCG	22	22	61.018	62.016	50	54.545	333
126	LInD1-126	Chr01	20801440	21773708	AGGTTGTGTTCGGTAGAGCTGG	GGCCTACCTATCGCCAATCCAT	22	22	62.243	62.009	54.545	54.545	307
127	LInD1-127	Chr01	20946631	21913200	TCGGTCAAACTCTTACCCTGACA	ATGACCGGTCGCTGATTTCAGA	23	22	61.257	62.048	47.826	50	318
128	LInD1-128	Chr01	21122593	22124184	GGCCTGTTCACTTTGATGCCA	GCCATGACCAACTGACCATG	21	20	61.919	62.03	50	54.545	328
129	LInD1-129	Chr01	21149762	22151283	TATGGCTCTGGTTCGTCTGCAA	ACGCTTGCACGATAGCTACCA	22	21	61.992	62.157	50	52.381	300
130	LInD1-130	Chr01	21176054	22166610	AGCTCTCGACAATTCCGTACCA	TCCATGCTCGATGTTAAGCCGT	22	22	61.464	62.369	50	50	303
131	LInD1-131	Chr01	21375846	22409952	CTTAGACCCCATGTCCCATGCA	TCCTTCTTAACGGTGTCTCTGTCA	22	24	62.085	61.231	54.545	45.833	316
132	LInD1-132	Chr01	22071613	23101001	TGGTGCAGAACTTGGAGAAG	TGCTTTACTGTAATCACTGG	20	20	61.916	61.855	50	54.545	333
133	LInD1-133	Chr01	22115843	23145190	CCTCACGCATCCTCTTTATTGTCG	GTTAGGATTTTCGTGCAGCGGA	24	22	61.783	61.503	50	50	348
134	LInD1-134	Chr01	22164902	23191469	CTTGCGCACAAACAAGGAGGAT	CGAGGCACAGTCGTTAAAACCG	22	22	61.965	62.286	50	54.545	340
135	LInD1-135	Chr01	22164944	23191473	CTTGCGCACAAACAAGGAGGA	CGAGGCACAGTCGTTAAAACC	21	21	61.965	62.286	50	54.545	340
136	LInD1-136	Chr01	22200172	23238654	TGTATGCAGCTGTCCTCTGTGG	TGGCAAACCAGTCCATATTCCCA	22	23	62.312	62.173	54.545	47.826	340
137	LInD1-137	Chr01	22930372	23973803	CTGCTTTGTCCCTGGACCCATA	GATGCCTAGATAAAACGCGGCC	22	22	62.018	62.003	54.545	54.545	334
138	LInD1-138	Chr01	22942027	23987510	CGGCGTACTTTCTCCGTTCCTA	GGTGCATCAGCTGTAATCTGGC	22	22	62.081	61.894	54.545	54.545	317
139	LInD1-139	Chr01	22995530	24040697	AGCATCGCCTTTGTAGTTTGGC	CTTGTGCTTTCAGTGGTAGGCG	22	22	62.027	62.006	50	54.545	312
140	LInD1-140	Chr01	23063948	24112619	AGCATCCTGATTCCTGTTCCTGA	AGGTGAGTTCCCCCAATTAACCA	23	23	61.399	61.543	47.826	47.826	302
141	LInD1-141	Chr01	23064458	24113077	AGCGCGCTAAACCTCCTACTAG	ATAAGTAGAGCCCGGCCAGAAC	22	22	61.898	61.866	54.545	54.545	301
142	LInD1-142	Chr01	23479517	24528794	GAGCATCACTTCACTCGTGG	CGCTAGTGATCTATTGCTGG	20	20	61.901	62.064	54.545	50	305
143	LInD1-143	Chr01	23479556	24528798	TCGCAGCTGCTCTGTACTATCC	AGTGATCTATTGCTGGGCACGT	22	22	61.901	62.064	54.545	50	305
144	LInD1-144	Chr01	23573919	24625620	ACGTATCAAAGTACCGGCAAAAACA	ACGGAGATACGTAGAAGACCGT	25	22	61.71	60.419	40	50	324
145	LInD1-145	Chr01	24588233	25716139	AAGCTACTCCCTTCGTTTCAATGT	GAAAAAGGAGCCTCCACGTTCG	24	22	60.505	62.003	41.667	54.545	333
146	LInD1-146	Chr01	26261349	27414829	AGGGGTGTGTTTGAACTGGACA	TGCGAAAATTGGGAAGCATGCT	22	22	62.025	61.985	50	45.455	340
147	LInD1-147	Chr01	26263507	27416955	AGGAGCAATTTCTCAACCAC	CTTGTGACGGAGCAGAGTTG	20	20	61.874	61.71	50	50	306
148	LInD1-148	Chr01	26299958	27455216	ACTATTGTCAGATGCACTGCAGC	AAAACCATCACAACTGCCAGCT	23	22	61.481	61.279	47.826	45.455	325
149	LInD1-149	Chr01	26360839	27505296	GCAACGTCGCGATACCTTGAAT	TTGAGCAACCTGGAACCCTGAT	22	22	61.864	61.898	50	50	304
150	LInD1-150	Chr01	26595929	27758237	TCTCTCTCTCACGGTCATGGGT	TTTCCACCTCCAGTTGCCTCAA	22	22	62.284	62.092	54.545	50	308
151	LInD1-151	Chr01	26656104	27814738	AGAAATTGGATCTGCGCACAGC	ACAGTTAGGGGGAAAATCGCGA	22	22	62.085	62	50	50	309
152	LInD1-152	Chr01	28162266	29080919	CACAGCCTGCATCTAGGACG	CACAGCCGTACGAACTGCTG	20	20	61.325	62.233	50	50	341
153	LInD1-153	Chr01	28226268	29140363	TGCATGGCATTTCATTGGAGCA	TCGTGATCTCTGCTGCTCTT	22	20	61.737	62.91	45.455	54.545	332
154	LInD1-154	Chr01	28296339	29222098	GGTTTTCAACCGGGGCTAAAGA	ACATCCAGATCCGCCGAAGAAA	22	22	61.077	62.059	50	50	340
155	LInD1-155	Chr01	28300150	29225865	AAGATCCCTCAGTTGCCTCG	TGGCCAGGAGGTGAAGTGTT	20	20	62.054	61.941	54.545	54.545	348
156	LInD1-156	Chr01	28403298	29339377	GAAGGGAGGGGCCACATAAACT	GCCTGTCGTCACTCCTCTTGAT	22	22	62.031	62.043	54.545	54.545	317
157	LInD1-157	Chr01	28452723	29396393	CTTCATCGGCACATTGGGCAG	GGTTTTGGTCTACGTGGCGTAC	21	22	62.209	61.743	57.143	54.545	350
158	LInD1-158	Chr01	28467674	29409070	TCCCAGAGTGTGCTGACGAATC	CAACTGCATCCATACCCTGCAA	22	22	62.296	61.207	54.545	50	333
159	LInD1-159	Chr01	28527113	29455639	CTATTGTCCCGTGTCCCCTCTC	TGGTATCACGGCGATGGAAAGA	22	22	61.856	61.794	59.091	50	307
160	LInD1-160	Chr01	28571963	29500913	ATGCAGCAGGAATCCAGGATCA	GGTCAGATCCACCCAATAGGCA	22	22	61.828	61.821	50	54.545	347
161	LInD1-161	Chr01	28575075	29503984	CGCATCTCGGCATGTGATTAGC	TTTTCGTTGCCTTCACCCGTTG	22	22	62.299	62.398	54.545	50	323
162	LInD1-162	Chr01	28584865	29513776	TTGTTGCATGTCCATGTTGCCG	GTCTACATGGCAGTGGTGACCT	22	22	62.786	61.998	50	54.545	305
163	LInD1-163	Chr01	28612983	29541874	TAGAAATATGCCAGGCCCGGAG	CCTACGACCAAAGTGATCCCGA	22	22	61.941	61.786	54.545	54.545	317
164	LInD1-164	Chr01	28726221	29663380	GTGTCTTCCTCCAGACCCCATC	AACACACCCCACCTGAATGTGA	22	22	62.065	62.092	59.091	50	306
165	LInD1-165	Chr01	28729915	29667058	AACCGGGTAAGCTTGCAAAAGG	TTTGGGATTTGGGGATATGCATGC	22	24	61.916	62.027	50	45.833	300
166	LInD1-166	Chr01	28806415	29729915	GGTTTACATTTGCTTCCTAC	TTCACCATAAGTTTATCAAG	20	20	61.993	60.324	54.545	41.667	328
167	LInD1-167	Chr01	28879753	29797818	TTGCCCCTAGCCATGAATCCAA	GGAGTATAGCCGGTGATGGGTC	22	22	62.039	61.984	50	59.091	323
168	LInD1-168	Chr01	28921587	29839664	TGGGATTTGTTCACTTGGGGGT	GTCCACAAATCCCTCCACATGC	22	22	62.115	61.783	50	54.545	321
169	LInD1-169	Chr01	29087644	30036149	GCCACATGCGTGTACGAGAATT	AGAGTGAAAGGGCAAGAGGGAC	22	22	61.813	61.946	50	54.545	311
170	LInD1-170	Chr01	29116695	30075700	CCCAAATGCTAGGATCATGGCC	GATACAGGAGAGAAGGGAGCGG	22	22	61.405	61.657	54.545	59.091	340
171	LInD1-171	Chr01	29170775	30134800	GGCAACCTCCATTCACTTCAGC	GCGGTCACATTTCACGCCATAA	22	22	62.031	62.072	54.545	50	302
172	LInD1-172	Chr01	29305007	30238836	TGTTCAGGTGACCCTAGATGCC	TTTGTGTGTGTTGTACGTGCCC	22	22	61.745	62.078	54.545	50	331
173	LInD1-173	Chr01	29350217	30287084	GGAGTGAATACAAGCATGCAACCA	GATGCATGGGGGCGACAATTAA	24	22	61.877	61.594	45.833	50	330
174	LInD1-174	Chr01	29366938	30303782	GCAGGCAGCATCCAAAACTTGA	CTGTGGGCAGAATGTGGTTGTG	22	22	62.233	62.221	50	54.545	327
175	LInD1-175	Chr01	29375096	30311970	CTCAAATTTCCGCCCGACACTC	TAAGAAACGGCCGTGTTTGGTG	22	22	62.066	61.888	54.545	50	327
176	LInD1-176	Chr01	29395185	30332245	AAGCTGCCACATACTACCTCCG	TGGTGGGTAGCTAGTTGGAT	22	20	62.115	61.224	54.545	54.545	338
177	LInD1-177	Chr01	29406659	30343659	GTGGATATCAGGGCAGCTTCCA	TGTCCCTGCGGAAATACCAAGT	22	22	62.141	61.947	54.545	50	311
178	LInD1-178	Chr01	29446362	30384673	TACCGACGTAGACACATGCC	GTGGAGACTCGAGAGCACACAT	20	22	62.335	62.032	54.545	54.545	327
179	LInD1-179	Chr01	29471570	30413641	TCTCCCTCTCCCAGATCTAGCC	GAGAGGGAGAGGGAAAGGGAGA	22	22	61.904	62.047	59.091	59.091	301
180	LInD1-180	Chr01	29566454	30490944	TGGCCTATGCAACTTAGGTGAGA	TCCTTGTGCACATGGTTCCTCA	23	22	61.394	62.147	47.826	50	337
181	LInD1-181	Chr01	29576720	30501245	GATAAGGCGCTGGTCTACGGAA	TGTTCATTGGGTGCAGCTCTGA	22	22	62.161	62.465	54.545	50	302
182	LInD1-182	Chr01	29710118	30632668	CTCTGCAAATGTTTACAATCGTCCA	ACAATTGAGCGGTTCCCTAAACT	25	23	60.335	60.498	40	43.478	301
183	LInD1-183	Chr01	29749726	30672532	CAGAGACGGATGGGCAAGTGTA	AGATCCATCAACTCTTGCCCGC	22	22	62.048	62.958	54.545	54.545	311
184	LInD1-184	Chr01	29828119	30751806	CCGGTACTCTCTCCGTTTCAGA	GCTGAGGCAGACTCCAACTACT	22	22	61.198	61.731	54.545	54.545	347
185	LInD1-185	Chr01	29898271	30822164	GAGAAGGAAAGCGGGCTACAGA	GCGAGTACTCCCTCCTTCTCAA	22	22	62.049	61.206	54.545	54.545	347
186	LInD1-186	Chr01	29909935	30833770	AGGCCGCGAAAACTACTCGTAT	CGCGAGGGAGAGAGATCATCAG	22	22	62.096	62.015	50	59.091	319
187	LInD1-187	Chr01	29980807	30965302	TCCCGTAACCATGCACAAGCTA	CGGCATTCCAGGCATTTGCTAT	22	22	61.999	61.913	50	50	321
188	LInD1-188	Chr01	30056708	31071981	GCACCAGCGTACTTAACCTGC	TCGAACAAAGAATAGCGCGCAC	21	22	61.859	62.349	57.143	50	332
189	LInD1-189	Chr01	30156457	31164769	AGCACATGTTTGACTGTTCGTCT	CATCAGCAGAAAGGCATGCACA	23	22	60.989	62.033	43.478	50	343
190	LInD1-190	Chr01	30256201	31264386	TGACGGATCGTTCGGAAAGG	AATGTCCTCTCTCCTCTGTG	20	20	61.801	61.99	54.545	52.174	335
191	LInD1-191	Chr01	30308457	31304989	GCCGAGTAGGAGTACACTCTTGT	TCCGTCAGTAAACCGTGAGACA	23	22	61.428	61.329	52.174	50	349
192	LInD1-192	Chr01	30820596	31599696	CCCGTTCACTTGCCTTGTTAGT	GGCCGTATCCGTATGAGCAGAA	22	22	61.069	62.226	50	54.545	324
193	LInD1-193	Chr01	30836890	31618755	CGTCCGTAAACTATTGGGGTGC	TCGTTAACATCGTCGTGCAGGA	22	22	61.565	62.269	54.545	50	300
194	LInD1-194	Chr01	30867482	31649454	GCGCCACCATACACTGTGAAA	CGGGTCACGGGTCACATAGA	21	20	62.566	61.332	54.545	54.545	340
195	LInD1-195	Chr01	31015927	31826584	TGCATCCAAAGCTTTGTTGAGCA	CGCCTTCAGATATCGGGATAGCT	23	23	62.057	61.742	43.478	52.174	340
196	LInD1-196	Chr01	31179709	31958205	AGATCGTGCACTACCGACAAGT	TCCCATTGCATGAGAGGTGGTT	22	22	61.715	61.965	50	50	339
197	LInD1-197	Chr01	31295521	32085905	AGGCACAACCACCATTAAACCA	TGCTTTTGAGGAAGTTCGGTGC	22	22	60.691	61.896	45.455	50	348
198	LInD1-198	Chr01	31310229	32100608	TCCCCATGCAGCTTACAAGGAA	AAGTCAATCTTAACGCGCCTCG	22	22	61.961	61.552	50	50	306
199	LInD1-199	Chr01	31479815	32267998	AGCGGACAAGCTTCACAAAATTGA	TGCAGATGCTGTAGTCCAAGCA	24	22	61.994	62.257	41.667	50	331
200	LInD1-200	Chr01	31484951	32273168	GCAAAACTTCCACTCTCTGCCC	GGTAAGAGAACGCTGCATGCAA	22	22	61.966	61.761	54.545	50	307
201	LInD1-201	Chr01	31494166	32282263	GCAGAGACGCGGATACATTTGC	GCTTGTGGCAATTGGGCTCATA	22	22	62.482	61.791	54.545	50	350
202	LInD1-202	Chr01	31619438	32332487	GACAAAAACGAAGAGGCCGAGG	TCCACTGGCCGAACCTTATCAG	22	22	62.003	62.059	54.545	54.545	301
203	LInD1-203	Chr01	31619442	32332540	CACCTATCGGATCCGAAGAC	GAGCCGAGCCTGTGCTTATC	20	20	62.015	61.817	50	54.545	313
204	LInD1-204	Chr01	31979858	32428029	CAAGCAGACTAGTCCACGTCGA	GGGCCGTACTTCAGTCGAGATT	22	22	62.013	62.1	54.545	54.545	312
205	LInD1-205	Chr01	32099918	32702395	GAAAAGCTGGTCGGGTCGAAAC	CTCTCGCTCCTGATCTCCATGG	22	22	62.251	61.974	54.545	59.091	317
206	LInD1-206	Chr01	32163191	32771803	TTTGGGCCCAATTTGAGCTGTG	AACTACCGATGTGATGCCACGT	22	22	62.19	62.303	50	50	349
207	LInD1-207	Chr01	32218494	32820849	GAGACGGGGAAAAGTTCATGGC	TCATCTCACAGTTTACAGGCGGA	22	23	61.771	61.628	54.545	47.826	343
208	LInD1-208	Chr01	32243398	32885669	TAATACCCGATGTGACACGCCA	ACGGATTAGTTGGTGGGACTGT	22	22	61.79	61.355	50	50	312
209	LInD1-209	Chr01	32264542	32906858	CATCCAAAATCACCTCCGCGAG	CTGGGTTTCCGTGTCCAACTTT	22	22	61.881	61.268	54.545	50	328
210	LInD1-210	Chr01	32366839	33065184	CTGATCTGATTTGGCGCCGTTT	GCGAAGGCCGAATCTGTGAATT	22	22	62.081	61.826	50	50	301
211	LInD1-211	Chr01	32389483	33085724	TGTTGCAAGGAGCTAGCTGAGT	TGAAATCTAAGCCAGCCGAGCT	22	22	61.935	62.064	50	50	343
212	LInD1-212	Chr01	32396956	33093425	AACTGCACATGACCATGGTCCT	GTCTTCACATGGAATCGGCAACT	22	23	62.22	61.423	50	47.826	342
213	LInD1-213	Chr01	32420096	33116629	TTGTCCGAGTTGAATGTTGG	TCAGCTTCTCCCCCTTCTCT	20	20	61.947	61.983	50	54.545	315
214	LInD1-214	Chr01	32493706	33183651	TGGACGGAGGGAGTACAGTTCT	AGTCCAAACTTAACTCACACGTCG	22	24	62.225	61.261	54.545	45.833	335
215	LInD1-215	Chr01	32501911	33191783	GCAAAACCGCCATTGAAAACCA	CCCTCCTCTTTGGGCTGACATA	22	22	61.317	61.492	45.455	54.545	348
216	LInD1-216	Chr01	32508718	33198264	GGGATTACTGGCCGTCAAGAGT	ATTGAGTATCGTTTTCCGCGCG	22	22	62.06	62.164	54.545	50	339
217	LInD1-217	Chr01	32527873	33218162	GGTGAAGGCGGCAGTTATTTGT	GAAATCTCCTGGGTGCAGTGCT	22	22	61.714	62.847	50	54.545	335
218	LInD1-218	Chr01	32541597	33231939	TGTGTACTTGCCATTCTAGCTTTGT	CCACCTTAGCCGATCTCGTTGA	25	22	60.977	62.099	40	54.545	345
219	LInD1-219	Chr01	32573260	33263640	CCTGTCCACCAAGACACAATGC	GGTATGAGCCGAAGACTACCCC	22	22	61.965	61.918	54.545	59.091	315
220	LInD1-220	Chr01	32597614	33300089	AGCCTGCTCCAGTCCATATCTG	TCATCGGCAAGGCAATCAACTT	22	22	61.613	61.141	54.545	45.455	340
221	LInD1-221	Chr01	32678207	33389500	TGCATCGTCGTGTACAGTCTCT	GCGTATAGCCACGTAGGACGAA	22	22	61.449	62.194	50	54.545	341
222	LInD1-222	Chr01	32715721	33427078	AGCTACAGATCCAAAAGGCGGT	TGGCTAGCTCACCGTTCATGAA	22	22	62.009	61.992	50	50	314
223	LInD1-223	Chr01	32722808	33434150	AAGATTTTACGCGCCCAATGCA	GCCTAGAGGTGCCTGTTGCTAA	22	22	62.032	62.321	45.455	54.545	340
224	LInD1-224	Chr01	32901645	33597267	TGGTGCTACTACCGGCAAGAAG	ACCATGCACGGTAACCTTTTCG	22	22	62.303	61.702	54.545	50	300
225	LInD1-225	Chr01	32973312	33675239	AGGTCCTTCAACTTGACGTCGA	TCGAACTTAAGCCTGAGTCGGA	22	22	61.592	61.138	50	50	313
226	LInD1-226	Chr01	32983122	33685090	CAATTGTGAGAACGGTTATG	ACGTAGCGCAAGATTCGAAG	20	20	61.937	61.673	54.545	50	321
227	LInD1-227	Chr01	33040563	33745557	TTAATGGGAGGCGTGAAAGTGG	AGGAAACATGCAGGGATGGAGG	22	22	60.878	62.355	50	54.545	323
228	LInD1-228	Chr01	33092251	33787191	AGGTGTTGCAAAATAACCGCT	CTGAGATTGAGTCCAGGGTG	21	20	61.557	62.068	43.478	59.091	334
229	LInD1-229	Chr01	33224634	33884932	GAGGCGCGCAATTCGAAATCTA	GCCCAAACTATAAGCCATGCCG	22	22	61.928	62.218	50	54.545	318
230	LInD1-230	Chr01	33225153	33885492	ATCGAGAAGGCATGAACTTGTCT	ATGACAGTACTGCAGCGTCACT	23	22	60.056	61.977	43.478	50	336
231	LInD1-231	Chr01	33471668	34109969	TTGGCAAGGTTACACTCCCTCC	CCGTGGATGATGCAGGACAGTA	22	22	62.212	62.114	54.545	54.545	306
232	LInD1-232	Chr01	33514224	34140911	CCGGTGTGGTCGTGATGATATAT	GCGTGTGAACTGTTCAATTTTGTCA	23	25	60.057	61.403	47.826	40	329
233	LInD1-233	Chr01	33660670	34303832	GAGCCGAGTATCCTAACCAGCT	AGTCAATCTGGGCTCGCTATCC	22	22	61.338	61.926	54.545	54.545	303
234	LInD1-234	Chr01	34288333	34919283	GAGCTCGGACTTGTCCTCTTG	TGGTACATCAAATTAATTCG	21	20	61.978	61.722	54.545	50	324
235	LInD1-235	Chr01	34578391	35204403	TGCGTGTATGGCTAGTCAACGA	GCACGGTTTGATGAGGGTTGTC	22	22	62.029	62.267	50	54.545	327
236	LInD1-236	Chr01	34854624	35473145	TCCCGGTGATCAATGTCGAGAT	AATCGATTCGTGCGTGGGTTTC	22	22	61.277	62.062	50	50	345
237	LInD1-237	Chr01	34871014	35489509	CTTTCCGTTGGCTGCTTCAACT	GGTGTCCAGTTCAGGTGAGTGA	22	22	61.9	61.865	50	54.545	342
238	LInD1-238	Chr01	35140568	35746719	CGTTGTGCGGCTAAAAGGACAT	GGCCCAAACCGATCACAACAAA	22	22	62.012	62.17	50	50	342
239	LInD1-239	Chr01	35710293	36184954	AAAGCATTTGGACGGTGGATGG	ACGAATCTGGACACGCATATGT	22	22	61.726	60.159	50	45.455	332
240	LInD1-240	Chr01	35920172	36394778	TCAAATCTGTGAATGCTTCGTCCT	TCACAGGTAGACTTTCTGATACCCT	24	25	60.804	60.519	41.667	44	329
241	LInD1-241	Chr01	36027978	36513347	AGTTCCGTAGAGAAACATGG	ATCGGAACGAATCGAGCAGG	20	20	61.961	61.842	50	50	320
242	LInD1-242	Chr01	36674317	37135401	TCAAGGCATCAACGATGAAG	CAGATGTCGACTGTAAACTG	20	20	62.135	61.69	50	50	315
243	LInD1-243	Chr01	37437801	37899648	CCCCTAACACGGTCAGCACATA	AATCAGGCTGGCCCTACTCATC	22	22	62.055	61.883	54.545	54.545	303
244	LInD1-244	Chr01	39171541	39642501	GCCAACGAGCAAACGATAGAGC	CATGGCCACCGTTACGACTTAC	22	22	62.418	61.557	54.545	54.545	303
245	LInD1-245	Chr01	39193781	39664825	ACAATGTTGTGGATTCACTGGTGG	GGATATGGGAGGGGATGGTGTG	24	22	61.768	61.956	45.833	59.091	301
246	LInD1-246	Chr01	39251795	39724607	CGGATCGCTAAACTCTTGACG	TGGACAAGTCATGTTTGAGCAGT	21	23	61.357	60.685	54.545	43.478	309
247	LInD1-247	Chr01	39307744	39781933	ACAATACCACTCCCTCCATC	AGCTGGGTTTAGGTTGCTCC	20	20	61.233	61.967	54.545	50	336
248	LInD1-248	Chr01	39316283	39790434	TGTGCGCACGTTTTTCAAACTG	GCTGTACGTAAACCACTCGCAC	22	22	61.54	62.038	45.455	54.545	315
249	LInD1-249	Chr01	39356897	39835896	AAGAATTACTCCCTCGTTCC	CCGAACGGGCTACACAATTC	20	20	60.457	61.191	40	50	340
250	LInD1-250	Chr01	39367236	39845522	ACTGCCTATTTCAATAGTCC	TTGGTCTTGAAGCTGGCTTC	20	20	60.816	61.941	45.455	50	319
251	LInD1-251	Chr01	39566564	40094724	ACAAACGGTTCATGGGCGAAAA	ATTTGGTGGTGAGCAAGGCAAC	22	22	61.846	62.179	45.455	50	308
252	LInD1-252	Chr01	39571069	40099730	GGCGCCCATGCTCCATTTATTT	TTTGCGCCCTTTGAACTCATCC	22	22	62.179	61.971	50	50	332
253	LInD1-253	Chr01	39709668	40232065	TCCCCCGCATCTCCATTTTCTT	ACAACCGTTGTGACCTGTGAAC	22	22	62.029	61.51	50	50	303
254	LInD1-254	Chr01	39816563	40406272	GCAAGATCATGGGCACAACGAT	TGGCTGCCGATCGATGCATATA	22	22	61.838	62.047	50	50	303
255	LInD1-255	Chr01	39826146	40415871	AGTTGCTCTGTTCCTTTCCGCT	GCCCCCATGCCTGCAAAATTAT	22	22	62.454	62.14	50	50	335
256	LInD1-256	Chr01	40081205	40665078	GTGGAAGTTCATTGTACATG	AGCACATCATGTTGCTTCAG	20	20	61.402	61.575	47.826	50	334
257	LInD1-257	Chr01	40304522	40872741	CTGGAACGCAAGCCAAAGGAAT	TCTCCTTGTTATGCCACCACGT	22	22	61.976	61.937	50	50	328
258	LInD1-258	Chr01	40311746	40879934	GCAGTGGAGTAGTGGAGTGTGT	CTTGGCGGTGATCGAGGTTAGA	22	22	61.921	62.099	54.545	54.545	342
259	LInD1-259	Chr01	40321945	40889182	ACAAGGGACGACTTCTCCTTTCT	AGCTCTGACGAGTACTCCATGG	23	22	61.262	61.268	47.826	54.545	346
260	LInD1-260	Chr01	40401328	40966433	CATTCCATGGCAGCTGCTATCG	TCTTCCTTCTCTGGCCTTGTCG	22	22	62.013	61.987	54.545	54.545	330
261	LInD1-261	Chr01	40437584	40997674	CCCGCACAGAGAAGACAGAGAG	CAAAGATGGTGGTGTTGGAGGC	22	22	62.342	61.976	59.091	54.545	330
262	LInD1-262	Chr01	40469269	41035110	ACTAGAAGAGGGCGGCTGTTTT	CCAGGGGAAAACTGACCGTACT	22	22	61.942	61.938	50	54.545	314
263	LInD1-263	Chr01	40559101	41136621	CCGTCTAGCTCAGTCGGTAGAG	GGCGGGAAAGGAGATCAGGAAT	22	22	61.374	62.143	59.091	54.545	350
264	LInD1-264	Chr01	40583588	41159371	TGAGACGATGAAAGCCTCAAGC	ACGTGGTATGGCGTCTCTTTGA	22	22	60.933	61.979	50	50	344
265	LInD1-265	Chr01	40597898	41173740	CCACTGTGGAGATGGAGACTCG	TCGATGTGACACGCCAAAACTT	22	22	62.097	61.318	59.091	45.455	300
266	LInD2-1	Chr02	29273	3223	AGAAAAACAATGACGCCCCAGG	GTGCATGGGCCCATCAATCAAT	22	22	61.66	61.871	50	50	344
267	LInD2-2	Chr02	406627	377067	TCCTACTCGTACGCCTCAATGC	CGAGGAGACGACAGCTAGCTAC	22	22	62.149	61.934	54.545	59.091	334
268	LInD2-3	Chr02	607260	575706	AAATCGGGCGTTGTTTCACCTT	ACCGGCGGGGGAGTAAAATC	22	20	61.591	62.261	45.455	60	304
269	LInD2-4	Chr02	727458	698287	ATATTGCATGGTTTGGCGACCC	ATGTGATCAGTAGCTGGCTGCA	22	22	61.854	62.067	50	50	321
270	LInD2-5	Chr02	731173	701925	CGTTGCATTGCCAGAATCCATG	CGGTAGCAATAGAACGGGGAGA	22	22	61.051	61.592	50	54.545	350
271	LInD2-6	Chr02	862356	835925	GCCTGCCTTTAGCTTTCAGA	CCAGCCCAGTTAGATCCAAC	20	20	60.878	62.059	50	54.545	348
272	LInD2-7	Chr02	1028786	1000925	ATGCCTTCTTGCCTGCCTAC	CTGTTTGGTTGGTGGCCTCAG	20	21	61.976	62.161	54.545	54.545	312
273	LInD2-8	Chr02	1411088	1394595	CCACAACACACACACACACACA	ATAGATGCGGCATTCGGGACAA	22	22	61.956	62.447	50	50	343
274	LInD2-9	Chr02	1458125	1445878	GGAGGTAGACGCAATGACCAGT	TGAGAGGGGAGAGGAGATCGAG	22	22	62.049	61.884	54.545	59.091	325
275	LInD2-10	Chr02	1585521	1573299	GTTTGCCGGTTTGCCCTAGT	CGGATAGAAGATCTGCCCTG	20	20	62.019	61.925	54.545	54.545	328
276	LInD2-11	Chr02	1969436	1956914	GATGTGTGAGGAGAGGGAGTGG	TGTTGTTGAGCTGCTGTTGAGC	22	22	61.797	62.145	59.091	50	309
277	LInD2-12	Chr02	2003637	1993406	TTTGGTTTGAGCAGAAGCCGTC	TGTACCACTTTGTACAGCGTGC	22	22	61.896	61.374	50	50	323
278	LInD2-13	Chr02	2058625	2048489	GGCCAACTATAGTCGAGGGAGT	GGTCGCTGAAGATGGCATGAAG	22	22	61.016	61.884	54.545	54.545	312
279	LInD2-14	Chr02	2110077	2077912	ACGGCACAAGAGAATGCATTC	CCCCATCTGGATCAGCGGTAAA	21	22	61.969	62.137	47.826	54.545	316
280	LInD2-15	Chr02	2275755	2197731	GCTGATGACTATGTGGAACGCG	ATCGCATTGTTGGAGCACCTTG	22	22	61.922	62.03	54.545	50	327
281	LInD2-16	Chr02	2322755	2234501	GCATCAATGTGCGAAGTTTCATCT	GGGAGTATGTTTTAGAGCATGCGT	24	24	60.674	61.216	41.667	45.833	334
282	LInD2-17	Chr02	2657111	2586368	TGTGTCGGGCGCCATCTAATAA	CTCTCTGTCCGCGTACTTGTCA	22	22	62.116	62.013	50	54.545	338
283	LInD2-18	Chr02	2726983	2668861	AAGTCAAAACCACAGTGTAG	CTAGAATCTAGATGGAGATG	20	20	62.148	62.121	50	50	343
284	LInD2-19	Chr02	2727272	2669109	CCCTCGGAGGTAAAGCATCTCC	TTAAGGGACGGAGGGAGTAGTTT	22	23	62.182	60.503	59.091	47.826	336
285	LInD2-20	Chr02	2786392	2744684	CGCTTTTCGTTTCCTGCGTTGA	TAGCAGTCTCCCTCCGTTTCAC	22	22	62.733	61.724	50	54.545	329
286	LInD2-21	Chr02	3024427	2990411	TGTGTCACAGGTCTTGGTTGGT	TTGAAGGGCCAGTTCCAAATGC	22	22	62.014	61.93	50	50	328
287	LInD2-22	Chr02	3027448	2993513	GCACTAAGTCGCACTGTTTGACA	AGTACGTCCGAGTAGGCGAGTA	23	22	61.829	62.104	47.826	54.545	315
288	LInD2-23	Chr02	3100021	3058107	AAGTGGGGGAGAGAACGACATG	GCCTAGTCCGATTTTCGTCCCT	22	22	61.998	62.112	54.545	54.545	348
289	LInD2-24	Chr02	3966115	3910590	ATGAACCCTAATGCCGCCTCTT	AGCACATGTGGAGGGAGATTGA	22	22	62.086	61.427	50	50	343
290	LInD2-25	Chr02	4010269	4030249	TCGGATGGACACTTAGGGAGTT	CGCTTGATGAACTATGGAGCCG	22	22	60.559	61.682	50	54.545	304
291	LInD2-26	Chr02	4200872	4232908	GTGTCTTCTTGCATTGTGAG	GTAATCGGTTGTAGTCTAGC	20	20	61.984	60.027	54.545	45.455	303
292	LInD2-27	Chr02	4361192	4397471	ACGTCTGTCCAGATTCGTGGTA	AAACGAAGACAAGTGGCCATCG	22	22	61.138	61.696	50	50	329
293	LInD2-28	Chr02	4381910	4406817	CCACTATCCAGCCCAAAGACCA	AATAGGAAAGGAGCTGGGTGGA	22	22	62.018	60.835	54.545	50	302
294	LInD2-29	Chr02	4478341	4491606	CGGAGGGAGTACATTCTATGCCC	GCCTAGCTGTGGACATTTAGGC	23	22	62.183	61.324	56.522	54.545	315
295	LInD2-30	Chr02	4492769	4506906	TAGCTGAGGGGATCATACCG	CATGCATGCCCATTTCCGTC	20	20	61.905	62.106	54.545	50	349
296	LInD2-31	Chr02	4495525	4509692	CAAACCTGCACAACACTTTCTGT	GCATGTCAAAGTGGGCAGACTC	23	22	60.367	62.02	43.478	54.545	350
297	LInD2-32	Chr02	4799269	4807721	CAACACCCGGAGCCACGAAA	GCGACATTGCTGCCCAAATCTT	20	22	63.279	62.604	60	50	338
298	LInD2-33	Chr02	4842607	4831527	GGCACTGAAGCATATGGTCC	AATGTCCCACTACACTGTGG	20	20	61.317	61.854	54.545	50	313
299	LInD2-34	Chr02	4870857	4859802	CGGGCCTGTTCACTTTGATGTC	GGGGGCTTTTATTCCCTCCGAT	22	22	62.016	62.161	54.545	54.545	325
300	LInD2-35	Chr02	4895682	4905817	TTCGATTATTCGCGTCAACGGC	GGTCACAACCAGAACCCAAAGC	22	22	62.159	62.164	50	54.545	335
301	LInD2-36	Chr02	6064148	6067260	CGCATAAATATCAAGCGTGC	CTGTTCTGTTTAGTTAACAC	20	20	61.351	60.391	40	40	305
302	LInD2-37	Chr02	6282383	6274029	ACCTGGGTTGAAAGCACTATGACT	GCAATTGAAAGCAATGGAACGAGT	24	24	62.039	61.088	45.833	41.667	328
303	LInD2-38	Chr02	6289476	6282097	ACTCTGCTATTTGTGCCGCAAG	TGCCTGTCCGTGTAATCAAGCT	22	22	61.764	62.254	50	50	320
304	LInD2-39	Chr02	6424448	6437801	TCAGGTATGTGAGGTTGCCGAG	GCACACCGTTCTTACGTGACAG	22	22	62.048	61.978	54.545	54.545	336
305	LInD2-40	Chr02	6818464	6893392	GCCGATTCTATGGCCTCTTTGG	GCTGGCTAGCTGATGATAAACTAGG	22	25	61.389	61.082	54.545	48	349
306	LInD2-41	Chr02	6820200	6895075	TTCGGTTTGTACCTTGAGTG	GTAGTAAAATGAGACATCAG	20	20	61.938	62.046	50	44	300
307	LInD2-42	Chr02	7259407	7369884	CCAAGGCAACCTCCAAGTCCTA	AGCCACCACCTCCTTTCTCAAG	22	22	61.952	62.209	54.545	54.545	345
308	LInD2-43	Chr02	8494360	8213047	GGCTCCGATAATGTCGATGG	GCCTTACACATGCTTTGACC	20	20	61.98	61.986	54.545	50	323
309	LInD2-44	Chr02	8520237	8239635	CTTCGCCGGGTAGCATCTCTAA	CAATTCGCACGGCAAAAGCAAG	22	22	61.907	62.281	54.545	50	331
310	LInD2-45	Chr02	8522426	8241763	TTGCAAACAAGCTAGGGGACC	GCAATGGACGTCAAATCGAG	21	20	62.42	62.065	50	50	333
311	LInD2-46	Chr02	8582819	8326907	GTAAGGCAGGGGCAAACTTGTC	ACAGAGTTGGCGTTCATTTGGG	22	22	61.972	61.651	54.545	50	326
312	LInD2-47	Chr02	8613313	8355083	ACCTAAGGTTGGGCCAAGACTC	ACGGAGGGAGTAACAAGCAACA	22	22	61.953	61.871	54.545	50	326
313	LInD2-48	Chr02	8616630	8358412	GGAAGGAGTTCAGATAGCGGCA	TCCAAATCGCGACGAACACTTG	22	22	62.115	61.987	54.545	50	336
314	LInD2-49	Chr02	8720862	8458035	CACGTGGGTTTCATCTGCTGAC	CGTCGGTGCACCTTTTACTCAG	22	22	62.006	61.74	54.545	54.545	307
315	LInD2-50	Chr02	8756462	8493809	ACCTTTCACTCCCATCTTGGCT	TAGAGCAATTCCTCGTCCGTCG	22	22	61.635	62.138	50	54.545	341
316	LInD2-51	Chr02	8774850	8512417	AAAACCGAATCCTAGCATGAGGC	CCAGGTAGCCTTTCTCTGCTCC	23	22	61.244	62.38	47.826	59.091	300
317	LInD2-52	Chr02	8788821	8524768	TAGAGGAGAGGAAGATCCGC	TGACCTGAACCAGTTCTACC	20	20	61.832	61.201	54.545	47.826	306
318	LInD2-53	Chr02	8824498	8561639	GGCAAACCAACCCACAATATCCA	GACACCTTTTCGCTTCGTCCTG	23	22	61.636	61.992	47.826	54.545	328
319	LInD2-54	Chr02	8826879	8564542	ATCAACCGGGTTTGTGGTCT	GGGTTAGACCGGACCTTCATA	20	21	62.408	61.196	50	52.174	314
320	LInD2-55	Chr02	9020932	8748231	TGGATACCTTTACCCCATGCCG	TTGATGCGATCTGAGCCATCCA	22	22	62.144	62.129	54.545	50	339
321	LInD2-56	Chr02	9071045	8798295	TGCGTGGGCATGTATTATACACA	AGCGGAGACTTCACCTGATGTG	23	22	60.432	62.301	43.478	54.545	350
322	LInD2-57	Chr02	9083313	8810261	ATAGGTTGCTAGCCGGTACACG	ATGTGCTGTGGCGTACTGTACT	22	22	62.161	61.983	54.545	50	307
323	LInD2-58	Chr02	9083883	8810852	CGCCAACGTCTTCCTCTCTCTT	ACCGACGAAGAATATTTGTGGAGA	22	24	62.285	60.082	54.545	41.667	314
324	LInD2-59	Chr02	9108372	8838842	TGGGATCGGTAAAAGATGAGCCA	GGAAGTCTTGAAAAATGCTGGCC	23	23	61.709	60.862	47.826	47.826	347
325	LInD2-60	Chr02	9122455	8852782	AAAGAGGCTTAGGCTGACTGC	CATAACCCACATCCTCCTCC	21	20	61.945	62.192	50	59.091	309
326	LInD2-61	Chr02	9123642	8854006	GTTCAACAACACCGGAGCGTAT	TGTTGTCAACGTCACCTCCCAA	22	22	61.438	62.322	50	50	349
327	LInD2-62	Chr02	9429312	9143817	GCGGAGGTTAAAGCAAACAGGT	ACAGATAGCAATCCCGGAATCCA	22	23	61.649	61.522	50	47.826	328
328	LInD2-63	Chr02	9474847	9189638	GCCACATTCATGCTAGATCCGC	CCACCTTCGGGGATAGATCGAC	22	22	62.01	61.973	54.545	59.091	323
329	LInD2-64	Chr02	9690683	9332833	ATGTTGCCTACATGCACAAGCC	GGACCTCCGTTAGAGTTTGGGT	22	22	62.041	61.676	50	54.545	324
330	LInD2-65	Chr02	9732375	9391968	CCACAACCCAACATATGGTG	CCCTAGAGGATTTGAACTTC	20	20	62.031	61.965	54.545	50	343
331	LInD2-66	Chr02	9849806	9534103	GTACAAGCTGCCTCCCATGAGA	TAGTCCCCCAAGGTGAGGTTCT	22	22	62.064	62.198	54.545	54.545	301
332	LInD2-67	Chr02	10132332	9607948	CCTGCACAGAGAGACGACGTAA	CGCATCTCCATCATCTCCCCAT	22	22	62.013	62.005	54.545	54.545	322
333	LInD2-68	Chr02	10160393	9633886	CGTACGCCACGTAGACCAAAAC	ATCCAATCCTCCTGCAGAAGATG	22	23	62.034	60.181	54.545	47.826	337
334	LInD2-69	Chr02	10242204	9738235	CCCAAAGAGCCGAAAAAGAAAACC	ACCCCAGGTTTGAAGACATTTCT	24	23	61.268	60.117	45.833	43.478	327
335	LInD2-70	Chr02	10247312	9743401	CTTCCCGCTCCTTGCCAATT	GACGGTCATTGGAAGCTTAC	20	20	61.986	62.116	50	54.545	320
336	LInD2-71	Chr02	10292766	9795926	CGCTTGGTCTCCCTCTCTTCAT	TGCTCCATTGTCTGCTCATCGA	22	22	61.797	62.052	54.545	50	343
337	LInD2-72	Chr02	10400359	9854211	ACAGTGAAGAAGTGAGTGTGCA	TGTTGTTGGTTGCAGCAAAGGT	22	22	60.093	61.991	45.455	45.455	319
338	LInD2-73	Chr02	10409171	9870560	CTGGGCTGGGAGAGGGAGTATA	TCCACTGGAGTTTTGGTACGTCA	22	23	62.178	61.757	59.091	47.826	316
339	LInD2-74	Chr02	10874722	10297063	CCACAGCCTCCACAGTACATGA	GGCTCAATAGATTCGTCTCGCG	22	22	61.997	61.477	54.545	54.545	334
340	LInD2-75	Chr02	12634816	12044223	GTCATTATCACTCGCCACTAATTTC	TGATAGGCTCAACTCCTACACTCAC	25	25	62.304	62.218	59.091	54.545	343
341	LInD2-76	Chr02	13306754	12716645	TCTAGCAGGTAGGAGGTGACGA	AAGACCACCATTGGACTCGGAG	22	22	61.751	61.998	54.545	54.545	313
342	LInD2-77	Chr02	13598629	12996737	ACATGAGTCCATGCCACATTG	GTCGGTGTGTTCCGATCTGGGC	21	22	61.56	62.075	47.826	54.545	310
343	LInD2-78	Chr02	14164389	13572791	TTGTGAGACATGTAACTTTG	GAACGACACCGTGAACGAAC	20	20	62.072	61.925	50	54.545	302
344	LInD2-79	Chr02	14757880	14169360	AATTGGAGGTGGTGGGGAAAGT	ATCCTCGAGAGTTGTGCCCATC	22	22	61.851	62.12	50	54.545	345
345	LInD2-80	Chr02	16278228	15722439	CCACTGAGACCAATGGGACC	TGGAGTTCGTCCTGCAGCTG	20	20	62.044	62.153	50	54.545	316
346	LInD2-81	Chr02	16335001	15763362	TTTTGGGGCATCCTCACATGGT	GCGCGAATGCACGACTTAATAC	22	22	62.506	60.903	50	50	330
347	LInD2-82	Chr02	16486181	15903281	ACGATCTTCGGGTGTCTCACAG	TGGGCCCATAGAGGTTAGAGGA	22	22	62.028	61.793	54.545	54.545	332
348	LInD2-83	Chr02	16685460	16090883	AACGGGCGACTAAGAGCAAG	GGAGCGAGATTTGCATCTTC	20	20	62.049	61.639	50	54.545	338
349	LInD2-84	Chr02	16711262	16129591	AGGGAGGGTGTGTAGGGTAGAG	GGTGGGTTTGACTGAGGACTGT	22	22	62.043	62.138	59.091	54.545	303
350	LInD2-85	Chr02	16724450	16145860	TGATGCTGCATCAGTTAGGTTCG	ATGTTTATAGCATAGCCGATCAGGT	23	25	61.231	60.046	47.826	40	306
351	LInD2-86	Chr02	16726950	16148335	ACGGCGTTTTGCTTTTAGTGGT	CTTGTCCCTAGTGGCCAGATCC	22	22	61.837	62.131	45.455	59.091	337
352	LInD2-87	Chr02	16841124	16260809	TCGTCGTAGGTGATGCTAAGCA	CGATTTTTCCATACGGGCCACT	22	22	61.518	61.262	50	50	326
353	LInD2-88	Chr02	16852847	16275245	GGCCGAGTTTAGATCCAAACGT	TCAGACAGGACCTTCAATGGCT	22	22	60.934	61.36	50	50	323
354	LInD2-89	Chr02	16882701	16302246	TAGAGGCATACCGAAGAGCGAC	TCTGAAGCTGCAAGAGAAAGCA	22	22	61.641	60.486	54.545	45.455	303
355	LInD2-90	Chr02	16935296	16370786	ACCATGGAGTTTTAGGCCCA	TGCCTTGGGAGTGTAGAGAT	20	20	61.904	62.064	50	54.545	314
356	LInD2-91	Chr02	16951578	16387190	TTCGATCCGTTGATCCGTTGGA	GTTGCAACGGATGAAGGCTATTT	22	23	62.04	60.119	50	43.478	310
357	LInD2-92	Chr02	16952328	16388899	GAAGAAGCGAGAGGAAGGGAGG	CTGCAAGATGGCTCGCGAAG	22	20	62.109	62.033	59.091	60	315
358	LInD2-93	Chr02	17032684	16470096	TGATAACTCACCGGTTCGAGGC	CAACCGACTGTGACCTTTGCTG	22	22	62.352	62.194	54.545	54.545	329
359	LInD2-94	Chr02	17088912	16521762	GAGATCATCCGAGCGCCAAAAG	AGGGACGACAGGTACAGGCT	22	20	61.936	62.443	54.545	60	336
360	LInD2-95	Chr02	17155731	16588653	TGGTGGGAACGAAGACTAGAGG	GCTGCGAGCTGTTTGTTTTCCT	22	22	61.145	62.461	54.545	50	347
361	LInD2-96	Chr02	17189338	16630902	AACATGGGAGGTACACTGGTGG	GATAAGGCTTCCCGTCTCCTCC	22	22	61.952	61.922	54.545	59.091	319
362	LInD2-97	Chr02	17201562	16642984	AGTTTCAGCCTCAGTCCTTGTCT	GTGGCTTGGAGGTTCAGGTTTT	23	22	61.519	61.277	47.826	50	347
363	LInD2-98	Chr02	17272919	16723969	ATGCACCTTAATGTCATCGG	CGCTGGATCTGACAATTGAG	20	20	61.635	61.884	50	54.545	304
364	LInD2-99	Chr02	17347417	16800819	TGCAATATCTTGAACGGTGAACGA	TCTCCTCTCCTCTATCATCCACCT	24	24	61.094	61.201	41.667	50	341
365	LInD2-100	Chr02	17363869	16813158	CCTCTGTCGACGGGAGATACAC	ACACATCCACCACAGCTTACGA	22	22	61.888	61.927	59.091	50	300
366	LInD2-101	Chr02	17367548	16816509	TCAGCCGTGACATCACTGTTCA	CCTCACTTCACTAGTCCGTAGCC	22	23	62.175	62.036	50	56.522	337
367	LInD2-102	Chr02	17371967	16820965	GCTGTGTACTGCCTCTCTTTGG	GCTCCACCCTCCACCACATTTA	22	22	61.19	62.278	54.545	54.545	323
368	LInD2-103	Chr02	17723992	17000221	TCACAGGCCGAGCAGAGTATTG	ATTGTGTTGTGTGTGGGGGTTG	22	22	62.361	61.797	54.545	50	340
369	LInD2-104	Chr02	17749543	17023827	CCTGCAAGCTTCAGCATCCATC	ACTGCGGTACACCATTACACTTT	22	23	62.154	60.495	54.545	43.478	345
370	LInD2-105	Chr02	17749593	17023835	CCTGCAAGCTTCAGCATCCATC	ACTGCGGTACACCATTACACTTT	22	23	62.154	60.495	54.545	43.478	345
371	LInD2-106	Chr02	17946341	17218364	ATTCCAGTACAGCCGTCCTTGG	ACGTACGTTGTGAGAGACTCCG	22	22	62.321	61.999	54.545	54.545	332
372	LInD2-107	Chr02	17992229	17305851	GAGGGCGAGAGAGAGGGAGATA	AGCCCGACTGCCTGTAACAATA	22	22	61.947	61.741	59.091	50	341
373	LInD2-108	Chr02	18016304	17333973	TGTATGTGTGCATCTTCCATGTGA	ATCTGCCCGCTACTGCAAACTA	24	22	60.565	62.059	41.667	50	311
374	LInD2-109	Chr02	18038590	17356217	TGGTGTCCAATCATTCATCC	CTTTGGTCTTGTTGGCACTG	20	20	62.405	61.946	50	54.545	350
375	LInD2-110	Chr02	18038957	17356536	AGAGTGTCCTTCGCCTCAAGAC	GAAGGCGGCAAAAGGGGTTAAA	22	22	61.978	61.922	54.545	50	320
376	LInD2-111	Chr02	18055630	17373242	CGGAATCGCGACATCAAACGTC	CCGAATGGGCGACATCGATA	22	20	62.692	61.491	54.545	54.545	304
377	LInD2-112	Chr02	18542561	18011364	GGATCAAGGGGGAGACATGG	ATGGGAGCGCTGCTGGTAAATA	20	22	61.883	62.137	59.091	50	347
378	LInD2-113	Chr02	19013439	18482004	ATTTACGAGTCCGGAGACCCAC	CCTCATGGGCCTAGAGTTTGGG	22	22	61.787	62.405	54.545	59.091	305
379	LInD2-114	Chr02	19154921	18621175	CCTTTCCTGCTCTCTCACCTCC	CCTCACGCTTAGACTCCGTTCT	22	22	62.058	61.772	59.091	54.545	311
380	LInD2-115	Chr02	19362953	18717442	CCGATGCCACCACATCGAGG	AATTACCTTGTTGCAATAGC	20	20	62.024	61.977	54.545	54.545	300
381	LInD2-116	Chr02	19456564	18805457	GGCTTTTCTTAATTGCAGAGTGAGT	GCCTGCAGACTAGAGACCTGAC	25	22	60.048	62.098	40	59.091	345
382	LInD2-117	Chr02	19780954	19115605	GTGGCTTTGAGAACTTCTGCCC	ACGATTTTGGATGGGATACGCG	22	22	61.966	61.376	54.545	50	348
383	LInD2-118	Chr02	19830032	19165924	ATTACTCCCTCCATTTCACAACGT	TGTGTGACCTCGCTTCTTTTCG	24	22	60.263	61.37	41.667	50	331
384	LInD2-119	Chr02	19862785	19199763	TCCCGTACTGAAAATGCTCCGT	TTCCATGGCTGTCCGTCTTACC	22	22	61.989	62.316	50	54.545	331
385	LInD2-120	Chr02	19885295	19222115	ACCACTACAGTAGCATCAAAACCG	TAGCGCAGTGGTAAACCTGACT	24	22	61.096	61.666	45.833	50	311
386	LInD2-121	Chr02	20049392	19402482	ATGGGACTAAGGGGGTGTTT	AAAAGTAGCGGTGGTGGTGA	20	20	61.973	62.133	54.545	50	326
387	LInD2-122	Chr02	20149892	19507981	TTACGCTCCTCTGCCATTTCCA	AGACCAAACAATTAAGCGGCCG	22	22	62.003	62.022	50	50	338
388	LInD2-123	Chr02	20157389	19515505	CGGCATCAACATGGTTCTGGTC	CCTACCCTGCGTGGTATTCACA	22	22	62.081	62.055	54.545	54.545	347
389	LInD2-124	Chr02	20189659	19542020	TGGCGTATCACTGTCTGGAAGT	CAGTGGCCCTGTTCAATGTTCT	22	22	61.407	61.077	50	50	326
390	LInD2-125	Chr02	20214583	19567113	GAACTTGTAGCTGATGCGGCTG	CGTTTCTACAGCTACCTCTGCCT	22	23	62.124	61.987	54.545	52.174	331
391	LInD2-126	Chr02	20273785	19615376	AGTACAACAGACACCCACTGCA	CATGCATTTCGGGGTCCATA	22	20	61.807	61.651	50	54.545	332
392	LInD2-127	Chr02	20409781	19741009	GTGCACTGCGATTGAGCTCAAA	GGCTTGGCTTTTGGTGGATTGA	22	22	62.258	61.93	50	50	321
393	LInD2-128	Chr02	20451936	19788316	GATTGCAATTAGATATACAC	TTGTAAAATGTCTGTTTCAG	20	20	62.012	62.474	50	54.545	336
394	LInD2-129	Chr02	20474150	19814946	AATGACACGAGACCGCTTGA	TTACAGGCACTCCTACTGCACG	20	22	62.231	62.291	50	54.545	304
395	LInD2-130	Chr02	20616708	19946843	TGCATTTGATCATCGATCGCCG	TACACCCTAAGTACGCAGTCGC	22	22	61.994	62.081	50	54.545	341
396	LInD2-131	Chr02	20675976	20012022	CCAAGGCCGTGGAAACTGAATC	CTGCTGCAGCTGTTTCCTCTTC	22	22	62.027	62.014	54.545	54.545	318
397	LInD2-132	Chr02	20771052	20108123	AGAGGCTGTTGCAGTTGTTCTT	GCAGTCTTCTCACCTGAAGCCT	22	22	60.685	62.252	45.455	54.545	325
398	LInD2-133	Chr02	20794947	20138362	CGCATATGGCTTCTCAAGTGGC	CGCCATCAACTAGCAGGAACAA	22	22	62.199	61.193	54.545	50	328
399	LInD2-134	Chr02	20878769	20216180	TCTGCACGTCACCCTAAATCCT	GGCTCAATAGATTCGTCTCGCG	22	22	61.415	61.477	50	54.545	304
400	LInD2-135	Chr02	20924046	20260331	AGTGGCTGCAATTCACTCTAAAAGA	CGTGGGCAAGCATCTTAGGTTG	25	22	60.978	62.081	40	54.545	344
401	LInD2-136	Chr02	21105809	20377426	TGTGTAGCCTTCACCGTACG	CTACTTACTCATAAGTCAAATC	20	22	61.471	62.01	54.545	50	329
402	LInD2-137	Chr02	23893626	23086868	CATGGAGATCCTCTGTGCCC	AGCCAAATTTGTGCACTCCTCG	20	22	61.886	61.965	54.545	50	337
403	LInD2-138	Chr02	24924951	24153763	GCAGGCCGTTCATCTTCTTCCT	AGGCTAGCTCAGGTTGCAACTT	22	22	62.893	62.209	54.545	50	350
404	LInD2-139	Chr02	28526955	28291928	TCCGTCCGGATTTGCTGAATCA	GCCGATATGCCCATGTGTTCTG	22	22	62.314	61.955	50	54.545	347
405	LInD2-140	Chr02	28558188	28327419	CCAACTAATGTTTCTGATAC	ACTATGAAGCTGCAAACAGG	20	20	61.577	62.194	45.833	54.545	335
406	LInD2-141	Chr02	29961251	29480960	TATTTACGGACGACGGAAGC	AAACCAGACCGGTCCCATCC	20	20	61.412	62.798	52.381	54.545	339
407	LInD2-142	Chr02	30135615	29658026	TTCCACGAGGGCAAGAGCAATA	TTGGCGGCAAGAGAAAAGAAGG	22	22	62.003	61.651	50	50	337
408	LInD2-143	Chr02	30137727	29660166	ATTGATCACGGGGAGGAGCAAT	TGGACCTCTGGAAAGACTGCAG	22	22	61.825	61.935	50	54.545	349
409	LInD2-144	Chr02	30252415	29793369	CGCACTGTGCTACTGCCTACTA	CCAGCGTGCATGCACTTCTTAA	22	22	62.088	62.015	54.545	50	309
410	LInD2-145	Chr02	30266533	29807543	AGGAAGCATCTTTCTGCGTTGC	GTAAGCAAAGTGACGCAACCGA	22	22	62.02	61.934	50	50	318
411	LInD2-146	Chr02	30379687	29918269	TGGGACCGTCCTAATTAAAAAGGGA	TGCTTTCTGGATTCCTAAACGGT	25	23	61.762	60.245	44	43.478	332
412	LInD2-147	Chr02	30783871	30325135	CTGCTGCAGCTGTCTTGTCA	CGCTGAAGGTTTGCCGGAAT	20	20	61.706	62.13	50	54.545	350
413	LInD2-148	Chr02	30840366	30381577	CGCGTTGATAATGTGACGACCT	CCTCTCGCATTGAAGCAGCAG	22	21	61.299	61.927	50	57.143	348
414	LInD2-149	Chr02	30847001	30388285	TTGCCATAAACCTGGTCCCACT	GTGTTAGCCTCAAATTCAACCCGT	22	24	61.904	61.814	50	45.833	303
415	LInD2-150	Chr02	30885830	30432257	GGACAAGCCCACGGGTAAAATT	AAGCTTCAACCCAACCAGAG	22	20	61.405	62.098	50	50	310
416	LInD2-151	Chr02	30961262	30507849	ATACATGCAGCAGGAGTCATCTC	AGGAAATTGATTGCCATGCCGT	23	22	60.244	61.476	47.826	45.455	318
417	LInD2-152	Chr02	31016438	30562993	ACGTGTCTTAAAAAGTCAACGGTGT	GGCATGCGTCGTCCAAATCTAG	25	22	61.591	61.932	40	54.545	340
418	LInD2-153	Chr02	31305819	30856401	CGAGTACTGCGTCTGCATTG	ATCGCCACTGCATTCTCTAG	20	20	62.034	62.284	50	54.545	308
419	LInD2-154	Chr02	31535219	31087171	ATGACACATACTGGTGCTGCCT	TGACAATTCAATCCGCCAGACA	22	22	62.012	60.552	50	45.455	342
420	LInD2-155	Chr02	32908870	32349696	CAGTGCCTACTATCTCTCTC	ATGTCTAGACAGTCCCATTC	20	20	60.024	61.597	41.667	50	325
421	LInD2-156	Chr02	33114301	32556467	CCACAAATCCACTGCCAAAGCT	GTCTGATCCGGCTCTCACGTAT	22	22	61.924	61.645	50	54.545	301
422	LInD2-157	Chr02	33458016	32979166	ATCCGTCTCGTTGCAGTCGTTA	ACACCGACAAACCAATTCCCAA	22	22	62.019	60.951	50	45.455	311
423	LInD2-158	Chr02	33756707	33129048	GTAAGTCGTAACATGGGCACGG	GCCTCTTGATTGAGAAGGACGC	22	22	61.557	61.566	54.545	54.545	347
424	LInD2-159	Chr02	33900648	33288650	ACGGAGATAGTAGTATTGTC	GTAGAACCTCATGGAAGAAG	20	20	61.446	60.281	50	40	303
425	LInD2-160	Chr02	34544511	33927739	TAGGGTAGGGTGTCTGGTTCGA	AGATGTTGGTGGTAAGCAAAGTGT	22	24	61.965	60.931	54.545	41.667	343
426	LInD2-161	Chr02	34705829	34090246	AGCACCTGATCCGGCCTAATTT	CTAGCCAACAATGCAAGCTGCT	22	22	62.086	62.034	50	50	342
427	LInD2-162	Chr02	34715230	34099631	TAACGAAACTTGGATGCATG	AGCATGCTCTATTCGATGAC	20	20	62.058	61.985	54.545	50	336
428	LInD2-163	Chr02	34915557	34313588	TCTGAATTCTGATCGCCGATCG	TGGGTACACCAGGATTTGATTCCT	22	24	60.606	61.566	50	45.833	338
429	LInD2-164	Chr02	35000082	34391612	AGCTGCGGGTAAACCTTTTATTCA	AGTGGACAAGGCATAGCACCAT	24	22	61.05	62.023	41.667	50	301
430	LInD2-165	Chr02	35103642	34499789	CAAATTGGAGCTGTCATCTG	ACGAAATATTCCCTGAACTGC	20	21	61.833	61.924	54.545	50	326
431	LInD2-166	Chr02	35124596	34521110	TTGGGTTGACGAAAGGGATGGA	CGATCGATCAGCACGCTACCTA	22	22	61.89	62.003	50	54.545	300
432	LInD3-1	Chr03	132719	22283	CGGCCCCATATATCCGTTTCGA	CCCTCCGTTTCACAATGTAAGTCA	22	24	62.298	61.041	54.545	45.833	300
433	LInD3-2	Chr03	160229	51952	TCTTCTTCACCTTCTCCGACGC	GCTGCACGTTTATCAGCCCATT	22	22	62.28	62.092	54.545	50	333
434	LInD3-3	Chr03	381460	322788	CAAGAGCACACACCCTTGCAAG	AATGCACTTACGGTTGTCCAGC	22	22	62.465	61.705	54.545	50	343
435	LInD3-4	Chr03	444864	386191	CTCCGCTGTACCTAGAGTGTGG	GAATTCCACGTAAGCCAACCGG	22	22	61.836	62.073	59.091	54.545	319
436	LInD3-5	Chr03	1059554	1000498	TCACCCAACCAGCTTGACTTC	AACTTTCATGGCGGACGACC	21	20	62.081	61.989	50	50	322
437	LInD3-6	Chr03	1774895	1499233	CTACCTACGGTGTGCTTGGTCA	TCAGCAAGTCTGACCACCAACA	22	22	61.979	62.069	54.545	50	317
438	LInD3-7	Chr03	1929384	1642581	GAAGCTTCGTTTCGGATCACGG	GTCGCCGAGCTTTTACACACAA	22	22	62.105	61.934	54.545	50	312
439	LInD3-8	Chr03	1952920	1666062	CCGTCTCGCAAATTAGTCGCAA	CAGCGTGGTGTTTGCTCGTATT	22	22	61.8	62.001	50	50	349
440	LInD3-9	Chr03	2071104	1774753	TGCTGCATGCGCTCGTGTCG	AGTACTAGTAGCCAATGTAG	20	20	61.918	60.748	54.545	50	334
441	LInD3-10	Chr03	3170928	2879284	AGTCAAACTTCCAATTTTAGCGTGG	TGTTACCATAGCATCGTCGTTCA	25	23	60.507	60.119	40	43.478	314
442	LInD3-11	Chr03	3273766	3001251	TAAATGGGGTTAGAAGGGCCCG	GGTGGGGCTTTCTAAAAGCTGC	22	22	62.089	62.296	54.545	54.545	312
443	LInD3-12	Chr03	3393566	3124906	TGCACGTTACATGCCAGACAAC	ACTCCACAAACATGCGAAACCA	22	22	61.947	61.268	50	45.455	330
444	LInD3-13	Chr03	3395992	3127346	AGATAGTCAACCGTTGGACATGAA	GTCCGTACGGTCCTACATAGGC	24	22	60.021	61.956	41.667	59.091	348
445	LInD3-14	Chr03	3690773	3414121	TATCCCTGAATCACATACTG	AACTCGCTCATCTGTAAGTC	20	20	62.192	62.192	59.091	50	319
446	LInD3-15	Chr03	5839065	5560984	CGGTACTCAGCATGGTCAAG	ACATGCGACAACTGAAGGTG	20	20	62.092	62.238	50	54.545	314
447	LInD3-16	Chr03	5859290	5579583	TACTCTGGTCACCAAGCCTCCT	GAAACGATCGGAACCACCTCCA	22	22	62.509	62.557	54.545	54.545	321
448	LInD3-17	Chr03	5873059	5593386	CCGTCTCGAGAGCTTTGACTGT	TTTTGGCGATGACCTGGTCTCT	22	22	62.273	61.941	54.545	50	317
449	LInD3-18	Chr03	5880989	5611973	CCTCTCCTGTCTGTCACAAGCA	ACGTGATTGGCTCTCGATCGAT	22	22	61.925	61.901	54.545	50	327
450	LInD3-19	Chr03	6007172	5738164	GAAGTCTCATATGGGATCTG	TAAACTCAACAACTCGAGAG	20	20	61.29	60.883	45.833	50	326
451	LInD3-20	Chr03	8108885	7904900	GCAGGCGGCATAAATCATCA	ATCTAGGCCACGATGCTAGC	20	20	61.646	61.981	50	54.545	338
452	LInD3-21	Chr03	8139687	7931518	CCCTCATCTTCCTTGAGCTCCG	TTTCTCACTCTTCTCCACGGCG	22	22	62.433	62.535	59.091	54.545	342
453	LInD3-22	Chr03	8271655	8063055	GCCGATGGGTGTGCCTCTAT	GTTGAGGGGAGCTTCTCTCGT	20	21	61.998	61.988	54.545	54.545	313
454	LInD3-23	Chr03	8373211	8138437	GAGAGCGCGAAGGAGAAGAAGA	TAGCACGCGTCACCAACAAATG	22	22	62.083	62.249	54.545	50	350
455	LInD3-24	Chr03	8501987	8237197	GCCACCTTCATCTGTCCTGCTA	ACGTCCTCTTTGGTTAGCTGGT	22	22	62.064	61.612	54.545	50	332
456	LInD3-25	Chr03	8520228	8269912	CATCATGGATCAGAGGGGCAGT	GGATCGGTCTTCACAGCTCCTT	22	22	61.886	62.054	54.545	54.545	327
457	LInD3-26	Chr03	8520999	8270646	ATGCACACAACATGGTCCATGG	CTACAGTTTCCCACCTCCCCTG	22	22	61.728	62.009	50	59.091	314
458	LInD3-27	Chr03	8526684	8276612	AGATCGTCTTTGTCGTAGAGCACT	TCACGAAGCTATGTGTTGCACG	24	22	61.633	61.739	45.833	50	350
459	LInD3-28	Chr03	8606209	8344721	TGAAGATGACGGATAAGTATGTGCA	AACGTGGTGAAAAGGCTGGATT	25	22	60.163	61.015	40	45.455	340
460	LInD3-29	Chr03	8663807	8401983	CGTGCAGGAATCCACAAAGACC	GAGGAATACCACGCACATGCAG	22	22	62.016	61.881	54.545	54.545	344
461	LInD3-30	Chr03	8807919	8547519	CCATCCTCGACGCAATTTGGAG	CATTCCCGAGTCCCATCCCTTT	22	22	61.881	62.086	54.545	54.545	333
462	LInD3-31	Chr03	9018182	8771228	TGTTGTTACGTGCAACTTGGCA	TGTATCCCCAGGAAACGGACAC	22	22	61.771	62	45.455	54.545	347
463	LInD3-32	Chr03	9029380	8782602	TCGAGGCAATAAGAGCAGGAGG	CAGAGGATAGCCACCCACACTT	22	22	61.859	61.749	54.545	54.545	325
464	LInD3-33	Chr03	9203205	9015985	ATATGGCGCATGATGCAATCCC	TGCGAGACAAATCTTTTGAGCCA	22	23	61.786	61.303	50	43.478	349
465	LInD3-34	Chr03	9282638	9083895	AATGGAGTATTGCTTAAACG	TAGCCATACCAGCCAATTAG	20	20	61.257	62.102	47.826	50	312
466	LInD3-35	Chr03	9420956	9211655	TGTCAGCGAATCCGGTTATAATGC	CGAGGAATGGAGGAACCCGTAA	24	22	61.561	61.795	45.833	54.545	348
467	LInD3-36	Chr03	9444050	9235493	CTCGAACCGCATAGAAGTTGCT	ACAAACTACTCCCTCCGTCGAA	22	22	60.991	61.077	50	50	341
468	LInD3-37	Chr03	9497074	9283962	CATTTCAGATGTCACCCAGC	AGCTCCAACTCTCTTGGCAA	20	20	61.527	61.883	54.545	50	318
469	LInD3-38	Chr03	9521974	9309476	TCCCGACAGGTATACTCGGTCT	TTAGCATGGCTAAATCGCTGCG	22	22	61.815	61.941	54.545	50	311
470	LInD3-39	Chr03	9583189	9364859	ATGGGCAGAGAAACAGAGCCTT	GGTGGTTCCTTTGTTCATCTGTCG	22	24	61.96	62.092	50	50	332
471	LInD3-40	Chr03	9644361	9415909	ATGGACCCAGATAACACACCCC	ACGTATAAACCCACAACTGCACT	22	23	61.764	60.495	54.545	43.478	341
472	LInD3-41	Chr03	10144039	9904880	AGCTTTCTCGTCAATCAAGCGTG	GCGCCCATTCTCATGCATGATT	23	22	61.947	62.226	47.826	50	343
473	LInD3-42	Chr03	10155575	9916398	ACATTCCCAAATCACAGATTCGCA	ACGCGGCGTATATAACTAGCACT	24	23	61.348	61.907	41.667	47.826	315
474	LInD3-43	Chr03	10168812	9926972	ACCGTCTTCCCCTCATCATTCC	TCTTTTTGAGCAAAGGCAGGGA	22	22	61.812	60.689	54.545	45.455	346
475	LInD3-44	Chr03	10209435	9969392	AGCGAGTCGTTCGTGGGAAG	GAGGTGATGGCGATAGCATG	20	20	61.931	61.813	50	54.545	323
476	LInD3-45	Chr03	10345438	10100836	ACGGTGGGAGTAACTCATACACC	TGGTCAGTCTGAGTCCTTTCGT	23	22	61.69	61.015	52.174	50	350
477	LInD3-46	Chr03	12313587	11737826	TAGCTAGCTAAGTGTCATGC	TTGCAGTCTCATTGTTTGTC	20	20	61.141	61.375	45.455	50	338
478	LInD3-47	Chr03	12328127	11752283	GGTGTGTCACATCCAGTACAGGT	GCACTGTGGTCCATGGACTAAA	23	22	62.13	60.552	52.174	50	350
479	LInD3-48	Chr03	12374577	11807811	GCACAAGAATCGCACGCAGTAT	GTGGGGTAGCATGGTGGGTAAT	22	22	62.119	62.093	50	54.545	319
480	LInD3-49	Chr03	12798431	12464265	AGAGAACGTGCAAACTGTGG	TATATGTAAGGATCGATGTC	20	20	61.932	61.579	54.545	54.545	324
481	LInD3-50	Chr03	12799600	12465448	GCCATCCAACTCACACGGTTTT	CCCGCACATGCATATTCCGTTA	22	22	61.906	61.383	50	50	310
482	LInD3-51	Chr03	12872772	12540467	CTTCCCCGATTCATCTGCATGC	CGGAAGAGGCTTCTCTGACGTA	22	22	61.959	61.514	54.545	54.545	315
483	LInD3-52	Chr03	12872820	12540474	CTTCCCCGATTCATCTGCATGC	CGGAAGAGGCTTCTCTGACGTA	22	22	61.959	61.514	54.545	54.545	315
484	LInD3-53	Chr03	12873984	12541587	AGGGAGTATCTAAAACACTACCGCT	TCTCGAGGCTTGTGCATGAAGA	25	22	61.102	61.986	44	50	336
485	LInD3-54	Chr03	13038721	12700723	CCAGGAGGCCAGAAAGATCA	TCCATCACTGTCCAGGCATA	20	20	62.012	62.13	54.545	54.545	308
486	LInD3-55	Chr03	14007802	14044825	GCGTTCCATTTGGCAACGTCTA	CATGGCTGGCAAAAGGGATCAC	22	22	62.008	62.365	50	54.545	325
487	LInD3-56	Chr03	14015963	14053011	TGCCTAGCTAAGAGGAGCAG	ATGGTTTCTACGAGTGGGAC	20	20	62.024	62.554	50	54.545	350
488	LInD3-57	Chr03	14025489	14062381	ACTGGGACAATCTTCTGTAGCG	TGCATGCAAAATCCATTGTCCCT	22	23	60.094	61.641	50	43.478	344
489	LInD3-58	Chr03	14056839	14103075	GGTTCGAGTAGGGGCCCTTTTT	ACCATCTCACATGCGTGCAAT	22	21	62.538	62.084	54.545	50	346
490	LInD3-59	Chr03	14316053	14362092	GATGGTTCTTCTGGCAACGGTG	GGCAAGAACAACGAGAAGGCAG	22	22	62.016	62.259	54.545	54.545	314
491	LInD3-60	Chr03	14385392	14444369	AGCTTTGACCCAGACGACAT	CAGGATGGATGACCGATCAC	20	20	62.192	61.91	50	54.545	347
492	LInD3-61	Chr03	14419705	14479635	ACAGTGCACAGATGACAGTCCA	TCTAGTCCCCACAGTGAACGTG	22	22	61.868	61.657	50	54.545	345
493	LInD3-62	Chr03	14430109	14490183	GGAGGATAGGAACGAAGGCCTG	ATGGGACCCCTTAACCATTGGG	22	22	62.182	62.052	59.091	54.545	347
494	LInD3-63	Chr03	14456121	14522066	GCATGGTTGTTGGGGTAAGCAA	ACCGGTTTCCTCTCAACGACAA	22	22	61.926	62.117	50	50	313
495	LInD3-64	Chr03	14481011	14547062	GCAACATTGCGCATGGAGGATA	ATGGTGGTTTAGGCTGACGTGA	22	22	61.899	61.937	50	50	306
496	LInD3-65	Chr03	14672577	14737173	TGGACCCACCTTGTTTTCTCCA	GCACGTGCCTCTAGTTTTGCAT	22	22	61.768	62.016	50	50	345
497	LInD3-66	Chr03	14819753	14887231	AATGTGTTCCCAGACGAGGAGG	GACGAGATTTTTGGCTGCCCTC	22	22	61.998	62.082	54.545	54.545	331
498	LInD3-67	Chr03	14833561	14905419	GACAGACGACCCGAATCCTGAA	TCGCAGGCGGACTATTTTCGTA	22	22	62.034	62.09	54.545	50	339
499	LInD3-68	Chr03	14851536	14935687	ATGCATCCTGACGTCGTTAGCA	TCACCCATAGCATGATGGCCAA	22	22	62.356	62.095	50	50	318
500	LInD3-69	Chr03	14943053	15019191	ACCTTTTTCAGATGCTTCGGTCA	AATTACTGACAGGCCCCAGTGG	23	22	60.747	62.283	43.478	54.545	301
501	LInD3-70	Chr03	14945429	15026670	GAATGGAAGAGCCGCACTGC	TAGTTCCACACAATTGCGCTGG	20	22	61.987	61.704	60	50	338
502	LInD3-71	Chr03	14955564	15039551	GAGGAGGAAAGCAGAAGGAGCA	GGGTTGAGGACAAAGGCTTTCG	22	22	62.002	61.962	54.545	54.545	326
503	LInD3-72	Chr03	15220640	15258023	TTGTACTGCATGAGAACCAG	ATTAGGTGTGGAGCTTCTTG	20	20	61.203	62.007	50	54.545	348
504	LInD3-73	Chr03	15262241	15298877	TGTCTAATTGGTTGGGCCCAGT	ACTTCGATGATAGCTAGGTTGGGT	22	24	61.904	61.18	50	45.833	331
505	LInD3-74	Chr03	15346482	15403779	TGCGTGTTTATAGGGGTGAGTGT	CTACCTGCCTGCTCCTACCTTG	23	22	61.885	62.12	47.826	59.091	315
506	LInD3-75	Chr03	16260164	16262258	AGCATGTCGGTATCAACTCCCA	GGGATTGGATAAGGAGGTGGGG	22	22	61.481	61.899	50	59.091	313
507	LInD3-76	Chr03	16261015	16263068	CACTCTTTTTAGCTCTCCGGCG	TCTCACTGTCGCTTGTTCCTTT	22	22	61.555	60.159	54.545	45.455	301
508	LInD3-77	Chr03	16287645	16274310	ATTCTCGGCGAGTTAACACG	GTGGGTATAGTGTGTCATAG	20	20	62.287	61.879	50	50	317
509	LInD3-78	Chr03	16315158	16307772	AGAGGGCAACAAAGAAGAGGGA	GCAAGGGCTTCACTAGAGAGT	22	21	61.3	61.937	50	52.174	314
510	LInD3-79	Chr03	16342425	16338133	GGATTCGATCAAGGGGGAGTGT	ACAACCCTACTCATGCTTTCTCGA	22	24	61.812	61.835	54.545	45.833	337
511	LInD3-80	Chr03	16344382	16340126	CATGCCACTAATCTCTGCAC	GCATAGCACAACGGAAACCC	20	20	62.187	61.714	54.545	50	349
512	LInD3-81	Chr03	16438969	16437526	TCTGTCTTTGCGGTTTCTGAGGA	ATGCTTCAAGTGACTGACGTGT	23	22	62.066	60.484	47.826	45.455	340
513	LInD3-82	Chr03	16554682	16525471	TAACCGAGCGTTGGAGAGATCG	GCAGGGTCCAAGATCTTGCAT	22	21	62.138	61.585	54.545	54.545	348
514	LInD3-83	Chr03	16719651	16654394	TGCAAATTGGAGCAGCTGTAGC	TTTCCCCTCCAAATTTGACGCG	22	22	62.03	61.967	50	50	323
515	LInD3-84	Chr03	16886702	16783781	CGAAACTTGAGGCACGGAGAAC	TGCAGATCGATACAAAGATTTGGGC	22	25	61.992	61.939	54.545	44	347
516	LInD3-85	Chr03	16938961	16835953	ATTGAAGACCCTGCACGTGTCT	CCTAGCACCAACGATCCCCATA	22	22	62.192	61.611	50	54.545	325
517	LInD3-86	Chr03	18061057	18584794	CCTGAGAATAGTTGGACCAC	AACCCCAGAAGAGGAGTTCC	20	20	62.058	61.899	54.545	54.545	313
518	LInD3-87	Chr03	19649466	20277899	AATGATATGTCATCTGCAAC	TTCCTGTATAACACAAAGTG	20	20	61.997	62.09	50	50	328
519	LInD3-88	Chr03	20112919	20944954	GTCAACAGCATGGCCACTCTTC	GATAGGTGGCTCGGATGACGTT	22	22	62.02	62.166	54.545	54.545	347
520	LInD3-89	Chr03	20170154	21014811	ATGAGTATGTCGTCGTGGCGAT	GACAAGTCAAGCCACTCTGCAC	22	22	61.897	61.946	50	54.545	326
521	LInD3-90	Chr03	20246068	21086384	TAGTCTCCAGGTAGCACCGTAG	TATGTGCTTGCCGGAGAAGTGA	22	22	60.421	61.992	54.545	50	332
522	LInD3-91	Chr03	20379273	21228366	AGGAGGTGTACAATGGAGGGGT	TGTGAGGGTGCTGCACATATGA	22	22	62.537	62.006	54.545	50	326
523	LInD3-92	Chr03	20725549	21607616	TACCGCTCTACTTGTGGGTTGG	CTTGTGCAGTGGCCGGAATAAA	22	22	61.989	61.713	54.545	50	350
524	LInD3-93	Chr03	20726302	21608330	ATCTTCTCTCCCATTTGCCCCC	ATCGTCCCCGGATCAAGTAAGC	22	22	62.102	62.177	54.545	54.545	349
525	LInD3-94	Chr03	20741748	21623723	CCGGCCAAAAGCAGAAGAGAAC	AATCAACATCGACGGTGCCAAC	22	22	62.271	62.012	54.545	50	339
526	LInD3-95	Chr03	20838486	21708050	TAAGAAAGAACACGTGAGCG	GCGTGTGTGACTATTGATTG	20	20	62.003	62.141	50	54.545	333
527	LInD3-96	Chr03	20928085	21802104	AGACAGTTGCGCTAAATTTGCAGA	TCAGCTGATGCCACTATCACGA	24	22	61.808	61.531	41.667	50	304
528	LInD3-97	Chr03	21071331	21950119	GCAAACATCCTCATAGGTGCCG	AGGGAGGTAGAGAGGCTGAGAG	22	22	61.89	61.831	54.545	59.091	321
529	LInD3-98	Chr03	21084619	21963402	CATGTAACTGGCTTGGCAACCA	AAGGTGGTCAAACAGTGCAAGC	22	22	61.659	62.103	50	50	303
530	LInD3-99	Chr03	21171348	22046157	GATCGTCAGCTAAAACCACCTGT	CCTACGATCAAACGGACGGCTA	23	22	60.865	62.145	47.826	54.545	318
531	LInD3-100	Chr03	21201356	22075710	CGCTTTGGAATGAGAGAGGGGA	ACCGTGTCATGTATGGCTCCTT	22	22	62.064	61.745	54.545	50	321
532	LInD3-101	Chr03	21399721	22248997	GAGACACCTCCATGGAGATCCG	TTGGCCAAATCATGACCACAGC	22	22	61.915	61.985	59.091	50	340
533	LInD3-102	Chr03	21649334	22489852	TCTTGTGGCTTTGTTCATCCGC	ACACAAGGTTTGCTGCTTTGCT	22	22	61.961	62.052	50	45.455	348
534	LInD3-103	Chr03	21744026	22597020	GGTCTTGTTCGGTTTAGAGCGG	CGTGTGTATGACAGGTGGACCA	22	22	61.496	62.237	54.545	54.545	333
535	LInD3-104	Chr03	22128993	23044999	AAGACTATGCACCACTCATC	GCTTATGCCATGATCATTGC	20	20	62.231	62.357	54.545	54.545	349
536	LInD3-105	Chr03	22208300	23142920	TGCGAAACTCCTCCTATATCCGA	AGCTTCCAACTCTTGAGATGAATGT	23	25	60.75	60.514	47.826	40	349
537	LInD3-106	Chr03	22244657	23232228	GATGCGGCGTGGATGTTGTC	CATCTTGCATGTGCTTCCTCCG	20	22	62.31	62.138	60	54.545	300
538	LInD3-107	Chr03	22467678	23468244	GCCTACGTAGAGGAAGGGCAAT	GAAAAAGGTTCACAGGGCTCCG	22	22	61.866	61.962	54.545	54.545	349
539	LInD3-108	Chr03	22520088	23553776	TGTTTGGTTCAAGCCTGAGAAGG	TTGCCGGGTGATTAGAGGAAGG	23	22	61.249	62.071	47.826	54.545	337
540	LInD3-109	Chr03	22585335	23602655	ACGTAGGCACCTCGTAAGTTCC	GTGACCCTAACCTCACTCCATCC	22	23	62.031	62.008	54.545	56.522	345
541	LInD3-110	Chr03	22803565	23670960	GATGGAGAAGGTGGAATACG	GCGACATACCCATTGACAGC	20	20	61.989	62.022	50	50	314
542	LInD3-111	Chr03	23818328	24705439	CATGAGAAGCAGGGAGTCACCT	CTCGTGCCGTTGGATTATGA	22	20	61.743	61.918	54.545	54.545	319
543	LInD3-112	Chr03	23867164	24754316	ATATGTGACGTGTGGAGGTGGG	CCGTGTTCCCTCATCTACCGTT	22	22	62.059	62.045	54.545	54.545	322
544	LInD3-113	Chr03	23925585	24843810	CTGTCATCACCACTACCCTCTTTT	CCCCACCATCCCTCTCCTATTT	24	22	60.263	60.971	45.833	54.545	350
545	LInD3-114	Chr03	23929593	24847860	ATGTTTGGGAGAGACATGGGGG	GCATCTCCCTCGATGAAGCTCT	22	22	62.034	61.919	54.545	54.545	326
546	LInD3-115	Chr03	23963851	24883008	GTGGAGGAGGATGGAGAAGC	ACCGCCTTCATCATTCCTTC	20	20	62.124	62.018	59.091	50	306
547	LInD3-116	Chr03	24014407	24958871	AAGCTGCCAGATGTAAGTGGGT	TGGTTAGCAAAAAGAGCAGCGG	22	22	61.956	61.961	50	50	313
548	LInD3-117	Chr03	24044602	24992646	GTGTGAGGTTTTGAGAGGATTTGCT	TGCCTCATGTTACCTCTCAAGGA	25	23	61.723	61.077	44	47.826	347
549	LInD3-118	Chr03	24098349	25046060	GCTGCTATGCAACCTAGATGGC	GATCTCACGACGTAAGCCCGTA	22	22	61.703	61.881	54.545	54.545	331
550	LInD3-119	Chr03	24181599	25110942	GCTCGTGTGTTGCAACAGGTAA	TGATAGGTCGAAGGAGGCATGC	22	22	61.883	62.181	50	54.545	331
551	LInD3-120	Chr03	24185235	25114529	ACGTCTGCTTTGAGGAGTACCC	ACGTTGTGCGGAAAATTCTAACGT	22	24	61.984	62.025	54.545	41.667	344
552	LInD3-121	Chr03	24226682	25156041	GTGCCGTAATCGTGCTTTTCGA	GTGTCCAACGTTTAACCATCCATCT	22	25	62.047	61.545	50	44	318
553	LInD3-122	Chr03	24267682	25199945	ACTCTTGGACTAAAGGAGAG	AAATCGAATCCGATTCTATC	20	20	61.464	62.084	50	54.545	324
554	LInD3-123	Chr03	24575934	26457078	AGTGCCGGGAAAATGGAGTAGT	CCCACCCTCCCTTTTGCTTTTC	22	22	61.687	61.931	50	54.545	318
555	LInD3-124	Chr03	24596603	26502725	CGCTTTTATCTGGTGCTCGGTG	CTAGAACGCCCGTTTTTCCGAG	22	22	62.119	61.801	54.545	54.545	302
556	LInD3-125	Chr03	24670323	26638509	CGTGGGTGAGAGTGGTGAAAGA	ACTGCATGGAAGAGCATAAGGGA	22	23	62.176	61.716	54.545	47.826	349
557	LInD3-126	Chr03	25172785	27132733	AAAAGGGGGCAGGTGATCTCTC	TCGGGTGCTTCATGTTCCTTCA	22	22	62.024	62.198	54.545	50	330
558	LInD3-127	Chr03	25217346	27176716	TTGAAGAAGTCGCAGCGTAC	ACAACATACAACATAAAGAG	20	20	61.912	61.154	59.091	50	341
559	LInD3-128	Chr03	25684544	27640423	TAAGGCAAGATCGACGACAGCA	TGGCTCCAAAACAATGGGGTTT	22	22	62.033	61.229	50	45.455	329
560	LInD3-129	Chr03	25884414	27828222	TGTGTGTAGGAAAGTTTTGATGCGA	GGACTGATTAGGCCGTGTTTCG	25	22	61.428	61.56	40	54.545	319
561	LInD3-130	Chr03	25887036	27830813	TCATGCACAATTCGCACAGACC	TCATCCCCACCGTCAATTGTCA	22	22	62.015	61.946	50	50	326
562	LInD3-131	Chr03	26144355	28097347	GGAAGAATCCGGTTCCAGGACA	CCCCGATGACGATCCTTCATGA	22	22	62.004	61.92	54.545	54.545	331
563	LInD3-132	Chr03	26177866	28129301	TGGCTTTTTAACCACCATTCGTCT	ACCTGCCTTTTGGTGTTGCAAA	24	22	61.23	62.002	41.667	45.455	348
564	LInD3-133	Chr03	26575867	28454866	GGAAGTCATGGATCCACAAGACC	TCCTTGCTCTCGATGTCTCTGA	23	22	60.933	60.619	52.174	50	349
565	LInD3-134	Chr03	26882338	29041926	CTCCTCCGCTTTGGTGACTC	AGCACGTCCTTCTTCACCAG	20	20	61.924	61.976	50	54.545	305
566	LInD3-135	Chr03	27150321	29309105	TGAAGCCAGTTTATGCCTACAGGA	AGCCAGGGATGTGTCGCTTATT	24	22	61.853	62.075	45.833	50	341
567	LInD3-136	Chr03	27250865	29752474	TCAAGGTCGCTGCTTGCTCTAT	TCCGTCCAGATGGCTAAGCAAA	22	22	62.053	62.003	50	50	300
568	LInD3-137	Chr03	27372616	29876205	CCACTTTGCCTTTGCTGTTCGA	ACATAGGACCCCCACTGTACCA	22	22	62.152	62.261	50	54.545	313
569	LInD3-138	Chr03	27422362	29925895	GAGACAAGTAACAGGTGCAGCC	GCACATTTTCAATATGCCATCCAGT	22	25	61.444	60.683	54.545	40	334
570	LInD3-139	Chr03	27463479	29966598	TGAGGCCTAAGATGCACTCACG	GGAGGGCCAGGGCTTTTCTTAG	22	22	62.361	62.925	54.545	59.091	344
571	LInD3-140	Chr03	27508583	30013255	TTGGTCCAACTTTCCTGCTCCT	AAGTGGCTATCGCACAAGACCT	22	22	61.831	61.998	50	50	328
572	LInD3-141	Chr03	27576648	30079803	GACTTGTTGAGTGGCACAGTGT	AGGCCCTTTTTACATGCGTTCG	22	22	61.258	62.022	50	50	331
573	LInD3-142	Chr03	27634558	30139350	ATCGTCGTGTGATGAGGTGGAG	TGTGCTAGATCTCTCTTGCCGG	22	22	62.093	61.849	54.545	54.545	346
574	LInD3-143	Chr03	27683547	30164073	GACAGAACGACCCGGTGTTCAA	ACAAGATTTGTTCTGGTGAGGAAGA	22	25	62.983	60.398	54.545	40	332
575	LInD3-144	Chr03	27714558	30191125	CATGGATACCCTCTAAGCCCCC	CCGCAACTGGCTACAAATCTGT	22	22	61.691	61.451	59.091	50	345
576	LInD3-145	Chr03	27835967	30313357	TGCCACATAACGAACTGTGCAG	CGTGTCCAACTTTGACTGTCCG	22	22	61.695	61.928	50	54.545	350
577	LInD3-146	Chr03	27836407	30313765	TCTCTGCCATCCCTATGTTGACA	TTGGCGCTAAACCCACAAGATC	23	22	61.141	61.455	47.826	50	342
578	LInD3-147	Chr03	27868135	30346085	CTAAGCCAATCAAAGCATAC	ATTCCATTGCAGATGGAGAC	20	20	62.075	62.016	54.545	54.545	336
579	LInD3-148	Chr03	27916714	30383201	TAGCCACTTCGTTTCTCCAGGG	GTGGTGATGAGAGGAGTCCGTC	22	22	61.993	62.094	54.545	59.091	338
580	LInD3-149	Chr03	28136578	30564287	GAGGGACCCGCTGTATATGGTT	TGGTGGGCAAAAGGGCATTAAC	22	22	61.612	61.936	54.545	50	300
581	LInD3-150	Chr03	28248552	30694856	CAAAAGAGCACGTGGGGAAGTG	AACTGGACTAGCACGTGTGGAA	22	22	62.206	61.861	54.545	50	343
582	LInD3-151	Chr03	28254107	30712952	TTGCGCAGATCGAGTTCTACCA	CCTTCACGCACGTCATATGCTC	22	22	62.033	61.922	50	54.545	324
583	LInD3-152	Chr03	28268074	30727051	GTGGTCCCGCATTGGATGAT	GCTAGGCGGCCCATATAGCT	20	20	62.156	61.607	54.545	54.545	350
584	LInD3-153	Chr03	28352872	30808451	AGCTTGGATTTGTAGAGGCAGTT	ACGATGTAACGGAAAAGTTGGAAGT	23	25	60.245	61.2	43.478	40	301
585	LInD3-154	Chr03	28403695	30859944	GCTTTCCTACGAGGACACATGC	GTGGAGCCACATACAAGCTGTG	22	22	61.563	61.764	54.545	54.545	324
586	LInD3-155	Chr03	28539794	30981308	TCGCACAACGGGAAGACATTTG	AAATTGCTGTGTGGTTGTGCCA	22	22	61.947	62.057	50	45.455	345
587	LInD3-156	Chr03	28577568	31016966	TCCATGTGCTGATTTTCCTC	CAGGCCACTTCCGCATAAGG	20	20	61.589	62.059	45.833	54.545	350
588	LInD3-157	Chr03	29796866	32637869	AAGGGGTTTCGGAGAATGTCCC	CGTGGCATGCTTCGTGTAGTTT	22	22	62.279	62.001	54.545	50	344
589	LInD3-158	Chr03	30239060	33075765	TCCCTCCCTGCCTCCTCTATTT	CCATCAAGAACCGACACGAACG	22	22	62.069	62.041	54.545	54.545	344
590	LInD3-159	Chr03	30386178	33231648	GTTTGGCTAGTGTGAATGGGCC	ACACCCAAAGAATTAAACACACCCT	22	25	62.038	61.106	54.545	40	303
591	LInD3-160	Chr03	30387311	33232907	ACGAAGTCTTCCAGACCGACG	GAAGTAGACCTTGGCGGAGT	21	20	62.068	62.647	57.143	59.091	318
592	LInD3-161	Chr03	30435172	33280179	CAGCAAGTGCCTGAACCATCTG	AGTTGGCTTTGTAGTTTGCTTCCT	22	24	62.024	61.174	54.545	41.667	350
593	LInD3-162	Chr03	30489800	33327576	TAAGACGGAGAGAGCAGTCCCT	TGCAAACACCCCTGTCTAGTACA	22	23	62.021	61.516	54.545	47.826	342
594	LInD3-163	Chr03	30509263	33347102	TGACTGTCAACCTGCCATCCAA	AACCCTGGTTTTCGTGTCCAAC	22	22	62.147	61.526	50	50	321
595	LInD3-164	Chr03	30509490	33347365	CGTATGCAGTATTCAGGTTCGTTGT	GAGGCGCCCGTGATTATTCATC	25	22	61.636	61.753	44	54.545	349
596	LInD3-165	Chr03	30776975	33602666	AACTTTGGAAGTGTTCGGCA	ACCCACAAGCCAATTCCCAAAC	20	22	61.586	61.874	50	50	330
597	LInD3-166	Chr03	30928344	33754075	GCAAGAGGTTGGCGAGAAGTTG	GCTCCATCGATGATTAGTCGCG	22	22	62.259	61.54	54.545	54.545	300
598	LInD3-167	Chr03	31098776	33861771	CGTGACAGCGTGTAGACCTC	CGAGTTACTGCCAATCTTGG	20	20	62.025	62.056	50	54.545	301
599	LInD3-168	Chr03	32466234	35483596	AGAAATATCATCATCATTAG	CGTGTTTGGAAAGACTCCTC	20	20	60.081	63.101	41.667	50	312
600	LInD3-169	Chr03	32767316	35787482	CACATGATGCTGGATTCGCTCC	TGTGTCCCTCCAGCACTCAAAA	22	22	61.949	62.081	54.545	50	330
601	LInD3-170	Chr03	32772438	35792557	GGGACTGAATGCAGCATGTGAC	AACAGACAAGCAACAGCCAACG	22	22	62.085	62.395	54.545	50	307
602	LInD3-171	Chr03	32888167	36033913	GCAGCCATAACTGTTGCAGCTA	CACGAAGACGCCAGCCATAAC	22	21	61.516	61.915	50	57.143	302
603	LInD3-172	Chr03	32990149	36143629	CCACCATTGCCAGAGTTAAC	CGTGTGCAGGAAGATGGCTT	20	20	61.77	61.965	54.545	50	311
604	LInD3-173	Chr03	33033988	36187068	AAAGATCGAAGGAGGTCGTCGC	AACCCTAGCCCATTTCCTTCCC	22	22	62.647	62.042	54.545	54.545	349
605	LInD3-174	Chr03	33061223	36214701	CGATGATGGATGAGTGAGGGCT	GCGTTTGGGGTAAAAGTCGACA	22	22	61.929	61.634	54.545	50	341
606	LInD3-175	Chr03	33255318	36440035	TGGGAGCAAGGTTAAGGTGAGA	ACTGTAGCACCATATTGCCAGATCA	22	25	61.03	62.154	50	44	343
607	LInD3-176	Chr03	33279914	36463867	ACAAGCACCAGATCGAGGAGAG	CGACCCATCTCCATCTCCATCC	22	22	61.787	61.991	54.545	59.091	345
608	LInD3-177	Chr03	33296723	36480733	GAGCTTTGGAAAACCCCGGTTC	TTTCCTGCGGTCCAATCAAACG	22	22	62.226	61.957	54.545	50	338
609	LInD3-178	Chr03	33324921	36508565	TGCACCACCGTACCATCCATTA	AACAACCCTCTATGTGCCGTGA	22	22	61.746	61.937	50	50	311
610	LInD3-179	Chr03	33504631	36688090	ATTTGTGGATGGAGCGCTGATG	CCACAAAGCAAAGGCCAGTGAA	22	22	61.584	62.113	50	50	303
611	LInD3-180	Chr03	33507089	36692559	CGGATAAAGTGTCTTTTGGCAAAGA	CCTGCTACGGATGAGTCTCCTC	25	22	60.278	61.648	40	59.091	350
612	LInD3-181	Chr03	33525906	36711303	TAGTTGGGGTGCAATGCAAGGA	TTCTGGGATGGACGGAGGTAGT	22	22	62.487	62.305	50	54.545	348
613	LInD3-182	Chr03	33532559	36717361	TGCCCACCGTACGCTATTAG	ATCTCCTATAGCTCCGATGG	20	20	62.291	62.032	54.545	59.091	346
614	LInD3-183	Chr03	33599592	36784558	AACTTCCCTGTCCCTCTCCTCA	ACACCGTATATGGGGCTCAAGA	22	22	62.19	60.958	54.545	50	338
615	LInD4-1	Chr04	722459	456088	GACCATAGAGGAGGTGTCACGG	TGACAGTGGTTTTGCTGACGTG	22	22	61.846	61.821	59.091	50	344
616	LInD4-2	Chr04	1147185	936406	CAACCAACATTTGCAGCCTCCA	CTTACGTAGCCCACACGCAAAA	22	22	62.178	61.689	50	50	343
617	LInD4-3	Chr04	1242719	1010205	TGTGCGCTCCCTCATATCTGTC	AGGGGGAAGAGGAACGGAAAAG	22	22	62.169	61.953	54.545	54.545	349
618	LInD4-4	Chr04	1306006	1069093	TCCGTACGAACCAAATCCCACA	AAATTCCAAGCAGCGCGTGTAA	22	22	61.929	61.957	50	45.455	305
619	LInD4-5	Chr04	1322781	1085820	GATGGAGTATGTACGACGCCCA	ATTGTTTTGTGTGCCGGGATCC	22	22	61.903	61.982	54.545	50	348
620	LInD4-6	Chr04	1395774	1463213	TTTCCACCTAGTAGAACAATTGGCT	GGATGGGACCGATTCACACGTA	25	22	60.222	62.106	40	54.545	350
621	LInD4-7	Chr04	1692476	1808125	CAGCAACGAACGTATCGCAC	TTCCCTTTTCACAGTGGATC	20	20	60.831	60.925	50	50	302
622	LInD4-8	Chr04	2016858	2120831	TGTTTCCGTGCGGATCCATAGT	CTGGTCGGTCGATAGCTAGACG	22	22	62.055	61.993	50	59.091	306
623	LInD4-9	Chr04	3043519	2752721	AGTAGCACCATCCCGGCCTA	TGATCGAGGTGTAGGGCAATCA	20	22	62.599	61.217	60	50	344
624	LInD4-10	Chr04	3044752	2753989	CTCTGTAGTACACGGTACAC	AAACTACCCACTTTCATTTC	20	20	61.092	61.848	47.826	50	343
625	LInD4-11	Chr04	3046605	2755819	AGTAAGAACTATTGGGCGGTTAGCT	CAGGACGATGACGAGCTAGAGG	25	22	61.86	61.947	44	59.091	340
626	LInD4-12	Chr04	3499554	3516311	TCATCCCCAGGAGGTTGAACTG	CAAAGTGGATGCCATGCTTCGA	22	22	61.69	61.773	54.545	50	312
627	LInD4-13	Chr04	3715593	3690010	TTGCTAGTGTTGATGACAAC	ACATACATCAGATGGAAGTG	20	20	62.328	60.322	54.545	41.667	350
628	LInD4-14	Chr04	3719978	3694370	AGCAAGGCTTTTCTACCGGTCT	AGCCTCAATCAGATAGGGTTGCA	22	23	61.942	61.716	50	47.826	318
629	LInD4-15	Chr04	3727950	3702305	GAAGCGCTCGATGATCCATGTG	TGTTGCTTGTGAGTTTCAGAGGC	22	23	61.989	61.791	54.545	47.826	345
630	LInD4-16	Chr04	3819377	3903716	TCGCCACAGCTTCATCCGTG	CCCAGGAGTACACCTCAACAC	20	21	63.112	62.255	60	59.091	334
631	LInD4-17	Chr04	3845723	3918920	ACGATCTAAATTTCTGGATCCGCT	AGGATGGATGGAAAGGTGGTGG	24	22	60.202	62.034	41.667	54.545	319
632	LInD4-18	Chr04	3846804	3922910	CATCGTTAGGCGGTAGGGAAGA	TGCAGCATCTTCACTGTCAACT	22	22	61.592	60.486	54.545	45.455	322
633	LInD4-19	Chr04	4233725	4012229	ACACACCCATACACATGCCTCT	GCACTGAGACCACACAGTTCGA	22	22	61.69	62.724	50	54.545	343
634	LInD4-20	Chr04	4262386	4064773	AGGAAGTTGTTGGCCCACTCTT	CGTCCATCCGAAGTGGGTTTTG	22	22	62.098	62.012	50	54.545	348
635	LInD4-21	Chr04	4270169	4074088	GGAGTGTACGAAGCCATGGGAG	ACTCAATGACGTAAAAGCGATGGAC	22	25	62.68	61.862	59.091	44	309
636	LInD4-22	Chr04	4374509	4115472	GCAAGGGCAAAAAGGAGACACA	GATGCACGGTATCTTGTGTCGC	22	22	61.854	62.168	50	54.545	319
637	LInD4-23	Chr04	4380668	4121703	GACAGTCCAAATCCACGTGCAT	CCGAAGCCACTCGAGTTTGATG	22	22	61.451	61.807	50	54.545	350
638	LInD4-24	Chr04	4430215	4187300	GGAGGGAGTAGCATCGATCGTC	AACATGTGAGTGCGGATTGCTG	22	22	62.018	62.019	59.091	50	310
639	LInD4-25	Chr04	4541200	4307201	CTATTTCGAGAGGCTTGTCG	AGAAGTAATTTAGTCAACTC	20	20	60.627	60.917	40	40	335
640	LInD4-26	Chr04	4622791	4402048	CACGATTGGCTGGGGAAATTCC	CGCCCATTAGCCACACATCATC	22	22	62.103	61.955	54.545	54.545	326
641	LInD4-27	Chr04	4798347	4556855	TCGGATCTAACATATCATGCCCAGA	ACCACTTATCCACCCCACTTACA	25	23	61.279	61.02	44	47.826	316
642	LInD4-28	Chr04	5465149	5229564	ATCAAATTGTGCCGCTCCAGTG	CAAAGGTGGGAGAGGCAGCATA	22	22	62.03	62.337	50	54.545	335
643	LInD4-29	Chr04	5587933	5379527	GTTTGACTAAGTTTACAGAG	ACGACATGATGTTCTACTTG	20	20	61.682	60.355	54.545	50	350
644	LInD4-30	Chr04	6130905	5757251	TTCGTTTGGCATGTGTACCAGC	ACCCTTCCAGGCACATGTTACA	22	22	61.957	61.894	50	50	324
645	LInD4-31	Chr04	6189605	5810249	TCAGCCAAATATGTGCATAG	AAAGCCTCCACCTCTAGAAG	20	20	61.96	61.501	50	45.833	307
646	LInD4-32	Chr04	8149408	13277034	CAAAGCATATGCCCACTTGCCA	CGCCTAAAGCCGGAAAACCTTT	22	22	62.051	61.968	50	50	308
647	LInD4-33	Chr04	8856870	8560365	TTGGTCAAGACGAAGGGGAAGG	AGCGGGCGAAGAGAACAAAATG	22	22	62.2	62.016	54.545	50	308
648	LInD4-34	Chr04	10092429	10000262	AGGAGGAATCACTGCTCGCAAT	GGCTCCCATTTCTCGTAGGAGG	22	22	62.068	62.182	50	59.091	343
649	LInD4-35	Chr04	11067244	11815522	ACGGTATATGGAACAGGCAG	AACCAAACGTTCATCGGTTC	20	20	61.936	62.478	54.545	54.545	320
650	LInD4-36	Chr04	11084783	11830077	CTGTGGCAGGCTAAATATGCGG	CCAGGCGATAACCCTCAACTGT	22	22	61.955	62.321	54.545	54.545	318
651	LInD4-37	Chr04	11086402	11831730	TGACCAGCAGGAGAATTGGAGG	GAATCTGCTTGCGAGAACGGTT	22	22	62.012	61.753	54.545	50	300
652	LInD4-38	Chr04	11093859	11839067	CATGCTCGTCTTGCTCATCGTC	GGCCGAGATGGAGAAGACAAGT	22	22	61.916	62.054	54.545	54.545	350
653	LInD4-39	Chr04	11510039	12231170	CACTGTCGCACACACTCGGA	ACTCATTTGGAAACCACGAGACG	20	23	62.678	61.351	60	47.826	315
654	LInD4-40	Chr04	11636320	12480379	GTTTCATTCGACCGAAGAAG	CTGCAGTATTTCTGAAGCAC	20	20	62.167	61.223	50	41.667	350
655	LInD4-41	Chr04	12673949	13606119	GTCTAGGAGATCTACTTAGC	TATGACATCGGATCTCTAGC	20	20	61.833	61.595	54.545	54.545	349
656	LInD4-42	Chr04	13227179	14040731	TGCTGTTCGTGGATATGTGGTT	CGACGAGGAGGATGATGGAGAC	22	22	60.29	61.957	45.455	59.091	349
657	LInD4-43	Chr04	13278480	14109203	GAGGAGTGGGAGGAGGTATTGC	GTAGCGGGTGGGTATTTGCAAC	22	22	61.87	62.084	59.091	54.545	327
658	LInD4-44	Chr04	13314700	14140519	AAATCAGAGGTACCTTGCTG	CCTACGATACGTCATTCATC	20	20	61.553	61.611	54.545	50	304
659	LInD4-45	Chr04	14098993	14929138	CCTGCAGTAACGTACGTTGTTCC	TCTTACGCTCCCTAAATAGGCCT	23	23	61.936	60.693	52.174	47.826	340
660	LInD4-46	Chr04	14563507	15262906	GCAGCTTGCCATCGCACAAG	GCTCGCTTCATAAGGACAAC	20	20	62.027	62.241	50	50	343
661	LInD4-47	Chr04	14866125	15587083	TTGCTAGTGGGCATTTTTGG	ACCCGGTGTCGTATCCTTCT	20	20	61.677	62.045	50	54.545	331
662	LInD4-48	Chr04	15008690	15677119	TGAGCGTTCAACGTTTGGATGG	CAGAGACAGAGTCAAGTGCGGA	22	22	61.947	61.966	50	54.545	327
663	LInD4-49	Chr04	15010940	15679406	AGCTAGTAGAGTGCACTGCGAC	TGTAACCAGTGCCCCAGAGATG	22	22	62.083	62.007	54.545	54.545	345
664	LInD4-50	Chr04	15050010	15733670	CAGAGCTCTGTCAGGCTTCACT	AGCACCGAAGAAGCAAAGCATC	22	22	61.985	62.02	54.545	50	343
665	LInD4-51	Chr04	15484214	16320177	AGAAGCATTTCCTCGGGTAC	GTTGTAAATGCATCCTCACG	20	20	62.072	62.352	54.545	50	329
666	LInD4-52	Chr04	15662371	16553576	TTTGCCATCATCGTCGTTGCTC	CCTCCATGTCCCCACCATCATT	22	22	62.065	62.101	50	54.545	324
667	LInD4-53	Chr04	15745188	16643304	CAGCACCTGAGCTTTCAGCATC	GAAGGACGCTACGGAACTCCAT	22	22	62.078	62.1	54.545	54.545	308
668	LInD4-54	Chr04	15747748	16645825	TACCAGGATACATGGACGCGTG	TCCATGCGAAAAGACAGTGTTGT	22	23	62.16	61.241	54.545	43.478	309
669	LInD4-55	Chr04	15933049	16822083	CGCCATTGCAACCTATCCATCA	TCCTCTCATTCCTTGACGCAGC	22	22	61.329	62.619	50	54.545	327
670	LInD4-56	Chr04	15979215	16858775	TTCTGATCGGGCAGGGGATT	GAGCTGTGACGAAGCGAAATCC	20	22	62.029	62.109	50	54.545	333
671	LInD4-57	Chr04	16056753	16949810	AGAACCGAGCTTTGTCAGTGCT	TAAGGCGCCGGAACATCTTTTC	22	22	62.441	61.51	50	50	336
672	LInD4-58	Chr04	16087367	16984339	TGGAACCAAAGAAAGTGCAG	CTTGCTTTTCTTGCCCACGG	20	20	60.623	62.421	45.455	50	350
673	LInD4-59	Chr04	16129546	17017910	CCTCTGTTCGTCAGGCCAAGTA	AACCCAATCCCACCACACAAGA	22	22	61.983	62.104	54.545	50	320
674	LInD4-60	Chr04	16779489	17603532	TACGTAACGTACATCCCCGTGC	AGCTTGGCTCAACTCAACATCA	22	22	62.39	60.488	54.545	45.455	319
675	LInD4-61	Chr04	16790524	17614704	ATCCCGTTTCTCCCATGCTAGG	GTTAAGCATGCTTGGCCTGGAG	22	22	61.879	62.096	54.545	54.545	336
676	LInD4-62	Chr04	17079239	17740988	TAGTTTGGAGGTGTGGCCGTAG	TGCAGCCTAGCTCTTATGCTCT	22	22	61.989	61.283	54.545	50	322
677	LInD4-63	Chr04	17156743	17818863	AGTTCAGACTTTCGGAGTAG	TCAAGTGTTTTATCGAGCAC	20	20	62.365	62.008	54.545	50	350
678	LInD4-64	Chr04	18735609	19470730	TGATAGATGTTGACAATTAG	ACTAGTAACAACCATAGTGG	20	20	62.055	61.407	54.545	50	315
679	LInD4-65	Chr04	18777098	19520945	ACGGGACCAAATTACCCTCGTT	CGGATGGCCATCTTGTGAACTG	22	22	61.944	61.829	50	54.545	336
680	LInD4-66	Chr04	18860187	19584434	GGCAACGCTTCTACTTGACCAC	TAAGATGGCACCAACCAGACCA	22	22	62.003	61.628	54.545	50	334
681	LInD4-67	Chr04	18934946	19640000	AAGCTCTCCCAAACAGACCC	GGCTCTAGTGGAATCGAGGC	20	20	61.946	61.926	54.545	54.545	320
682	LInD4-68	Chr04	18947923	19653045	TCTTCCACCGTTCCATGACTCC	CAGCCATCCTACTCGTGTGTGA	22	22	61.993	62.038	54.545	54.545	317
683	LInD4-69	Chr04	19360435	20370369	CCAGCCACGGCAAATTGAAAAG	CCGTACTGCAGCTGGCTACATA	22	22	61.436	62.164	50	54.545	350
684	LInD4-70	Chr04	19368329	20378195	CATCGCTGAGGATGCAGTAG	AGGTTACAAGGAGAATGAAC	20	20	62.857	60.225	54.545	45.455	307
685	LInD4-71	Chr04	19400419	20410702	AACCGCTTTCAAAACCACCGAG	TTGTCACACGTTTGGTTGGGTG	22	22	62.148	62.028	50	50	327
686	LInD4-72	Chr04	19495551	20528585	TCACGCACTGTACTTACTGCCT	ACTCGTCGTCTCCGTTTTGTTT	22	22	61.657	60.736	50	45.455	350
687	LInD4-73	Chr04	19600170	20627826	TCGCGTTCTGTTGACTGGGT	TTCCAACGACCATGAGGAAC	20	20	61.979	61.88	50	50	321
688	LInD4-74	Chr04	19832922	20865461	GTCCCTTCTGTCTCCGTCTTCC	CTCACCTCTGGAGTCAGGAAGC	22	22	62.04	62.047	59.091	59.091	327
689	LInD4-75	Chr04	20300276	21005170	CGGTCTACAAGCGATCAAAG	AGAAGAGAGGTGATTAGATG	20	20	61.875	60.202	50	41.667	307
690	LInD4-76	Chr04	20370925	21075967	AGGACGGAAGGGAGTACTAGCT	AACTTTTTGGGGACAGAGGGGT	22	22	61.766	61.783	54.545	50	319
691	LInD4-77	Chr04	20810784	21629736	CATTTCGTTGCTGCCTGTGGAT	TTAGCCTTGATGTGCATGCAGC	22	22	62.03	62.095	50	50	327
692	LInD4-78	Chr04	20865424	21684552	AGATTCCTGCAGAGTAGACTGTGT	ACTCTTGGGATCCCTTCGTAGC	24	22	61.056	61.541	45.833	54.545	344
693	LInD4-79	Chr04	20881382	21703798	CTTGAGGTGGTCACTGTCCTCC	TGGCGTGACAGTAAAGCACAAC	22	22	62.247	61.883	59.091	50	349
694	LInD4-80	Chr04	20965991	21776813	GTTAGCTTGTGGGGTTTGGGTG	TCCAGTCTAGTCCACCATCTCCT	22	23	61.916	61.669	54.545	52.174	327
695	LInD4-81	Chr04	20989225	21800716	GGTCTAAGAACAAGACGGGCCT	GCAAATCTTCTGTGTGGTGCCA	22	22	61.995	61.909	54.545	50	343
696	LInD4-82	Chr04	20993753	21805325	TCGGCCGAATTGTAAATCGAAAAGT	TCACTTCTAACGCAAAAGACCGA	25	23	61.818	60.491	40	43.478	350
697	LInD4-83	Chr04	21024366	21835983	CAAGAATCGCGGAGGCGATG	TCTAGAGCTCTGAGAATTCC	20	20	62.258	61.942	54.545	44	350
698	LInD4-84	Chr04	22982246	23726008	AATTTCAACAATGGTGCCCGGG	GCTGCCGTTTTATTAATTTGGGGA	22	24	62.252	60.382	50	41.667	350
699	LInD4-85	Chr04	24694295	24960587	CACGCTAATCAGGTGATTTG	TAGGACTAAGGAATTAGGTC	20	20	61.937	61.784	50	54.545	301
700	LInD4-86	Chr04	26091393	26437908	TCACTCTCCTCACTTTAATCGAGCT	CTTGGGAGGGAGGGGGTATAGA	25	22	61.327	61.862	44	59.091	349
701	LInD4-87	Chr04	26819309	27266388	GTGTGCATCTTCTATGGCTG	GAATAGATTGTTTCCATTCG	20	20	61.955	61.963	47.826	54.545	341
702	LInD4-88	Chr04	26926061	27360953	AAGCGAAAGAGGAAAAAGCGGC	GCGATGTGATGCTCATTGGGAT	22	22	62.521	61.391	50	50	318
703	LInD4-89	Chr04	27222282	27664973	TATACCCGTTCGAGTTCATG	TGATTCAAAGTGCCATATAG	20	20	61.856	62.441	45.833	59.091	319
704	LInD4-90	Chr04	27641002	28065646	TGCGATTCTTTCTTGGGTGTGA	ATGTGAGCCTGTGAGCAAATGC	22	22	60.486	62.034	45.455	50	327
705	LInD4-91	Chr04	28008475	28464663	CCCACAAATCAAATGGCTCCCG	AGACCACACCTTCGAGAAGCTC	22	22	62.36	61.978	54.545	54.545	345
706	LInD4-92	Chr04	28020757	28477191	AAGGCTGCAGCTTTCCTCAGTA	ACCTGACGATGAGATGGCGAAA	22	22	61.945	62.048	50	50	325
707	LInD4-93	Chr04	28041393	28498653	GCTAGCTAGCGTGGAAGGAGAA	CCCTTCTCTTGACATAGGCCAGT	22	23	61.846	61.708	54.545	52.174	326
708	LInD4-94	Chr04	28114734	28573761	TCTCCAAGGCTGTGCTGAAAGA	GTGCATGTTCACTGTCACAGGT	22	22	61.878	61.323	50	50	333
709	LInD4-95	Chr04	28379643	28660251	CAGGGCTATCGATAGGAGAG	TCATCATTTCCGTCGTTATG	20	20	62.002	62.135	54.545	54.545	333
710	LInD4-96	Chr04	28540254	28935165	TGGAATTGATTGTTGGGGCTGT	CAGCCATGTCAAGCCATATGCA	22	22	60.759	61.591	45.455	50	350
711	LInD4-97	Chr04	28540424	28935300	ATGGCTTGACATGGCTGGAT	ACATCTTCAGTGACGTTGGG	20	20	62.094	61.875	50	50	345
712	LInD4-98	Chr04	28584852	28982201	CTTGACCTGCAGTGGATCTCCA	TCCTACGGTGACTCTTGGTTGC	22	22	62.001	62.238	54.545	54.545	304
713	LInD4-99	Chr04	28940928	29344489	TTATGATCTGCTGCCTGCTGGT	TGTGGCTTGCCACACTTTTTGT	22	22	62.078	61.991	50	45.455	334
714	LInD4-100	Chr04	28944615	29348347	TCCCTTCCGCTGTTTGGAGTAG	CGGTGTAAACTAATGGGTCCACC	22	23	61.993	61.177	54.545	52.174	332
715	LInD4-101	Chr04	29217096	29561728	TTATACCGTTATACGATCAG	TAGTATATATGAAGTCGGTG	20	20	61.66	62.003	50	50	329
716	LInD4-102	Chr04	29847914	30199210	TAAGTATAGGTTGCGTCTTG	TTCAGCGCACTAGGCATAAG	20	20	62.004	61.865	54.545	50	307
717	LInD4-103	Chr04	29889005	30267483	ACTAAGAGCACCCGCAATGGTA	AGCTACAGGACCACAAGGATCG	22	22	61.741	61.793	50	54.545	347
718	LInD4-104	Chr04	31431285	31797684	ACACTACATGCACCGGAAACTC	TGATACCCGGTTTTGCCTAGCA	22	22	60.87	62.01	50	50	307
719	LInD4-105	Chr04	31431644	31797997	TCGGTTTTTCTCTGGTTCTTCTGT	GCGGCGGCTAATACTACTAGGA	24	22	60.384	61.454	41.667	54.545	329
720	LInD4-106	Chr04	31447122	31825211	CCAACTTTGTGCAGTACCTGGC	GGCTGGTAGCTTCCCTCTGA	22	20	62.218	62.009	54.545	54.545	342
721	LInD4-107	Chr04	31454538	31832668	CACCTGAAACTTTCTCAAAC	TCAAAATGCTGTCCTCCGTC	20	20	61.579	60.487	54.545	45.455	304
722	LInD5-1	Chr05	16738	14110	GGGATGGGATGAGGTGAATG	CTAGTACATGTGTCTCTGAC	20	20	60.633	61.965	50	54.545	345
723	LInD5-2	Chr05	29746	27273	TGGACATCAAAGTAGGGGCAAGA	GGTTCGAAACCCTAATTGGTAGTGT	23	25	61.591	61.032	47.826	44	350
724	LInD5-3	Chr05	45595	43032	CCACCGTTTTCAGGACATTCGA	ATGAGGAATGTGCGGTGGAGAT	22	22	61.126	61.815	50	50	303
725	LInD5-4	Chr05	82297	79723	AGAGAGAGAGAGAGAGCAGGGC	GTCCTCATGGCATTGCACCTTC	22	22	62.405	62.096	59.091	54.545	309
726	LInD5-5	Chr05	97493	88605	CAACTGAAGCACTGAGTGGCTG	CCTTGCTGGTTGTTGGTACGTG	22	22	61.949	62.201	54.545	54.545	335
727	LInD5-6	Chr05	152512	144166	TGCTTTGTTCTTGCCAGTTTCGT	GTTGACGAGTCAGTGAAGCAGC	23	22	61.981	61.986	43.478	54.545	328
728	LInD5-7	Chr05	654523	625275	TTAGCTGCGTGACGAGTAGGAC	TCCTCCGCTAGAGAGTGTCAGT	22	22	62.074	62.01	54.545	54.545	346
729	LInD5-8	Chr05	687384	669099	GCATCGTGTAGCGCTTGTATGT	TAGACCGTTTTCCACCCGTTGT	22	22	61.615	62.124	50	50	325
730	LInD5-9	Chr05	688627	670381	CAGCTCACTGCCGTTTCTTTCT	TCATTACAGCAGTGATCAGTGAACA	22	25	61.382	60.511	50	40	340
731	LInD5-10	Chr05	791217	783028	AGGGTGTGTTTAGTTCTACGCCA	TCTTCAGGTTTTGGTCGGTGGA	23	22	61.822	61.813	47.826	50	312
732	LInD5-11	Chr05	809082	812194	GTAGCTGACATGTGGACCCACT	GGGTTTAGATGGGCCAGAGGTT	22	22	61.998	62.031	54.545	54.545	317
733	LInD5-12	Chr05	830066	833145	ACAATTCCTCGTTCCCACCAGT	AAATGGAGGGACTAGCACGCAT	22	22	61.885	62.075	50	50	326
734	LInD5-13	Chr05	841991	849748	CATCACCCCTCCCAACCTTTCT	GGGTTTTTCTTTACCCGGCCTC	22	22	61.967	61.72	54.545	54.545	337
735	LInD5-14	Chr05	866527	874318	CAACCCTCTTCGCCTCATTCAG	TCGGCACTCCACCTGATGTAAG	22	22	61.255	62.048	54.545	54.545	348
736	LInD5-15	Chr05	958117	962516	GATCTCGTGGTGAACTTGTG	AAGGAGCAGTTGATCGAATG	20	20	62.104	61.947	47.826	50	311
737	LInD5-16	Chr05	1010541	1010057	CCAATTGCGTGGATGGCGATTA	GCAGCTGTTTGGTAGCCAACTT	22	22	61.895	61.91	50	50	333
738	LInD5-17	Chr05	1027169	1026747	ACCGTGGTCAAATTGGCTGTTG	TTGTGCAAATGTGGCTTTGGCT	22	22	62.163	62.384	50	45.455	315
739	LInD5-18	Chr05	1281194	1275516	GTGCTTCATCGTTTGGTGGAGG	CAAGCTCTGCCAACCTGTAGGA	22	22	62.016	62.258	54.545	54.545	350
740	LInD5-19	Chr05	1302087	1296328	TGGCTCTGACTACTCCCTCC	GCCTCTGTATGTCACACCGG	20	20	62.046	62.115	54.545	54.545	335
741	LInD5-20	Chr05	1308552	1302762	CCGAGCTCATTTAAGCCAAGCC	ACGTTGCTCGCTGATGAACAAG	22	22	62.146	61.995	54.545	50	333
742	LInD5-21	Chr05	1761408	2098269	TTGTGGGGGCTGATGTGGAT	ATTAACCCAATCAGCAAGCG	20	20	62.085	62.103	54.545	50	337
743	LInD5-22	Chr05	1769965	2107403	GACTATCCCTCTAAGCCCAGCG	CGGCTGACCTCTAATTGTGCAC	22	22	61.978	61.817	59.091	54.545	346
744	LInD5-23	Chr05	1825052	2154465	ATGCCCCTAGTCGGTTTTGGTT	GCACGGTTCATCACAACACAGT	22	22	62.224	61.886	50	50	305
745	LInD5-24	Chr05	1830327	2158993	GTGGACGCCGACAAACAGTTAG	ACGTGTGATTGACATTTCCACCA	22	23	61.988	60.996	54.545	43.478	350
746	LInD5-25	Chr05	1834362	2170714	ACAGTGTTGCCTGCTAGGTCA	CACGCCAACACGCTAGCTTT	21	20	61.945	61.997	50	50	350
747	LInD5-26	Chr05	1841310	2177918	CTCACCCTCATCGCTACTCCAG	CGTGCTCTCCCTCTTTGCATTC	22	22	61.905	61.82	59.091	54.545	303
748	LInD5-27	Chr05	1892633	2228974	TTAGTGAGTGAAATGGGCCGCT	CCTGCATGCCTTGTGATTGCTT	22	22	62.266	62.303	50	50	348
749	LInD5-28	Chr05	1893188	2229567	GATTAGAGTTGCAAGATTAG	GAGGGAGTATATGGCATGAG	20	20	62.053	61.937	50	52.174	320
750	LInD5-29	Chr05	2109914	2431791	TGTCGGAATTTCACCAAAGCCG	CTGCTGTCCCAATCAGATCCCA	22	22	61.957	62.078	50	54.545	307
751	LInD5-30	Chr05	2202041	2521859	GTGCCCATCAGGTCGGATATGA	GAGAAACACGAACGGGAGGCTA	22	22	61.931	62.287	54.545	54.545	330
752	LInD5-31	Chr05	2572194	2887182	CCGGAGCCATCGTTACGAAAAG	AGACACAGTACGTACCACCAGT	22	22	61.864	60.751	54.545	50	350
753	LInD5-32	Chr05	2620713	2937012	TCCTCATCCACGGTCATCTCCT	TTCTTGTCGGCCTGTGGTAGTT	22	22	62.364	61.871	54.545	50	304
754	LInD5-33	Chr05	2672903	2987839	TCACACGAGCAATTTTACGGTTCT	ACGTTGCACTCGACATTCTGTA	24	22	61.272	60.288	41.667	45.455	300
755	LInD5-34	Chr05	2698050	3012648	AGCATGGGTTAGAATGGTGAATGA	CGGGAGGTATTGAGGCATGGTT	24	22	60.325	62.4	41.667	54.545	346
756	LInD5-35	Chr05	2851815	3232978	AAAGGCGTAGTCAACAACAG	TGGATCTCTTAAACCGCAAC	20	20	62.064	61.894	54.545	50	323
757	LInD5-36	Chr05	2868368	3249307	GCCTGCAAAATTGACAGCGTGA	TGCGATTTTTGCAGAAGTCCCT	22	22	62.772	61.075	50	45.455	340
758	LInD5-37	Chr05	2891431	3272587	TCCTCCATTTGTCGCCCATTCT	TGAGCCCACCTTATCAACGACA	22	22	62.018	61.674	50	50	346
759	LInD5-38	Chr05	3489908	3997845	ATTAATCTGGACAAGCTGTCTGTCT	CAGATGAGAATGGACGATGGGGA	25	23	60.046	61.823	40	52.174	334
760	LInD5-39	Chr05	3497320	4005269	CCAAATATCCGATGTGACAAGGACT	GTTCTGTTTGGGAAGCGTGCAT	25	22	60.916	62.218	44	50	320
761	LInD5-40	Chr05	3508086	4016002	TCATGTTTCCTCTGTCCCCCAC	TGTTTGGAGGCATTTACTCTGTGA	22	24	61.952	60.446	54.545	41.667	335
762	LInD5-41	Chr05	3519616	4027401	CCGGCAATTGACCTAGGTTCCT	CCCATCCGGTCGTAAGTTCGTA	22	22	62.333	61.835	54.545	54.545	350
763	LInD5-42	Chr05	4151240	4655349	ACATTAGACCAGCTGTGGAG	TGAATCAGTTAGGATTGATG	20	20	61.604	61.983	54.545	50	348
764	LInD5-43	Chr05	4207261	4717104	GTTGCAACGCACGGGTATTTTT	AGCATACTAGCTGTTTACACACCTT	22	25	61.113	60.28	45.455	40	308
765	LInD5-44	Chr05	4449316	5081365	TGGAAGACGTACACGCACTACT	TTTCAAATGGTCAAGCTCGGGC	22	22	61.388	61.971	50	50	310
766	LInD5-45	Chr05	4611807	5244175	ACTATGCCCTCGAAGTCGAG	TAATGGTTCGGAAAATGTGC	20	20	62.022	61.702	54.545	50	322
767	LInD5-46	Chr05	5151361	5746412	CCTTCTTCCTCCTCCGATCG	GACGCCGCTGATCTGAAAAC	20	20	61.902	62.001	59.091	50	318
768	LInD5-47	Chr05	5206158	5823064	TGGGACCCACATGTCAGTTTCA	CACAAAGCTCCTTCTGCCATCG	22	22	61.826	62.074	50	54.545	342
769	LInD5-48	Chr05	5264552	5866825	TGAAGCAGAAGCAGCAGGGAG	TGTATGCCTGTATGCACGTCTT	21	22	62.657	60.094	57.143	45.455	335
770	LInD5-49	Chr05	5298643	5914471	TGGTAGATAGCACCCGACCCAT	TAACTATTGACACCGGCGGCTT	22	22	62.701	62.311	54.545	50	325
771	LInD5-50	Chr05	5301333	5917214	TCTCTCTCTCCCCCATTCCCAT	TGCTTACTGCTACCACACAGGT	22	22	61.801	61.611	54.545	50	311
772	LInD5-51	Chr05	5347202	5973573	ACTCCCTCCAGTCATGACTATTTGA	ACTGCATACTCCATCCAGTCATACA	25	25	61.051	61.397	44	44	322
773	LInD5-52	Chr05	5366281	5988322	TGAACGCGACTAGAGCTAGCTC	GATCAGTAGTCGCCATGTCGCT	22	22	61.879	62.462	54.545	54.545	300
774	LInD5-53	Chr05	5383312	6002986	TGCATGCGTTCGCCATACATTT	GGTACGCATGGGATTCTTTAAGGT	22	24	62.086	60.926	45.455	45.833	348
775	LInD5-54	Chr05	5402376	6021947	CTACTATCCCCACCGGTGACAC	TTGCCAATTTCCAACAGGGGAC	22	22	61.852	61.61	59.091	50	339
776	LInD5-55	Chr05	5410986	6030185	CATGGATTTCACGTGCAAGT	GGGGCAGCGATGCGATTAAT	20	20	61.233	61.817	50	54.545	325
777	LInD5-56	Chr05	5426388	6045779	GAGCTTTTACTGGGGTTGTGGC	CACACAGGCAGCCAAAGATCAG	22	22	61.972	62.024	54.545	54.545	348
778	LInD5-57	Chr05	5449935	6069304	ACTGTTGCTCCGATCCAAGT	CCGTCCTCTCTATGTATCCA	20	20	62.192	61.233	50	50	343
779	LInD5-58	Chr05	5568465	6166969	GATGGGCTAAGTTAGTCATG	GGTGAATCGGTGTGTAATTG	20	20	62.023	61.898	54.545	50	332
780	LInD5-59	Chr05	5908499	6390018	ACGCATATGCATCACATGGCTA	ACGAGGATGTGCCACATTATCAA	22	23	60.551	60.37	45.455	43.478	332
781	LInD5-60	Chr05	6206196	6719624	CGCTCTCATTGTGCTGTTGTGT	GCCTGTTCTCTGAGCTGTGGAA	22	22	61.945	62.506	50	54.545	305
782	LInD5-61	Chr05	6208159	6721464	CCGTTTTCACCCATGAGTGC	CATGTACGCAGACACAGCTT	20	20	61.905	61.894	50	47.826	350
783	LInD5-62	Chr05	6217664	6731229	TCATTGGTTTTGCGGCTACACC	TCCGAGGGTTTCTCAAGAGATGT	22	23	61.967	61.072	50	47.826	315
784	LInD5-63	Chr05	6249925	6763458	ACTGACTCTGTGAACAACCCCG	GGTCACAACCAAGTTCACTGAGC	22	23	62.435	62.087	54.545	52.174	342
785	LInD5-64	Chr05	6655053	7191596	TTCGAGAAAGAGCACTGGAGGG	TGCAGTACACCATCTTGAGGCA	22	22	61.987	61.94	54.545	50	337
786	LInD5-65	Chr05	7693013	8174666	ACATGACAATGCGATGTTTC	CAAAGAGATTACAGGCGAAG	20	20	62.173	62.076	54.545	50	328
787	LInD5-66	Chr05	9611253	9788249	AATTTCAACAATGGTGCCCGGG	GAGAGCTGAGAAGAGGTGGGTG	22	22	62.252	62.047	50	59.091	332
788	LInD5-67	Chr05	10878003	11456788	CGTACGGTTGTAGTCGGATCGT	GCTCCACTGGTCCTAACAAGGT	22	22	62.119	61.942	54.545	54.545	324
789	LInD5-68	Chr05	11515807	12099249	TGACAAGCTAATCATGAATG	GCTAGAGATGGTACAATTAG	20	20	62.076	61.866	54.545	54.545	326
790	LInD5-69	Chr05	12368237	12936933	ATCAGTCCATGTTCCGGCTCAA	TGTACCCTGGATCCAATGGACG	22	22	62.007	61.807	50	54.545	350
791	LInD5-70	Chr05	12863931	13662411	AGCCACAGTTCTAGTTTGAG	CATATGTCAAGAAATGCTGC	20	20	61.819	61.949	54.545	50	333
792	LInD5-71	Chr05	13498935	14296702	CGTGATATCTCCGTCCAATG	CAAACCTACTGGATGGCACG	20	20	61.149	62.378	45.833	50	344
793	LInD5-72	Chr05	14333214	15320674	AGTTGAGCTCCGAAAAATCCGA	ACCTTCTCCATGTCTACTCCAACC	22	24	60.289	61.606	45.455	50	334
794	LInD5-73	Chr05	14534233	15642130	TTAACATTTGTGCGCGGGATGG	TGGGTTTCATTTGTTGGGATGGAC	22	24	62.337	61.782	50	45.833	327
795	LInD5-74	Chr05	14577581	15684541	GTAATATGCCAATAGACACC	AGTTGGCGACGACGACGCAG	20	20	61.903	62.113	50	59.091	317
796	LInD5-75	Chr05	14788501	15833235	TTTTGACGTATACGGACGCACA	GCTGTCGAGATGTGGGAGCTAG	22	22	60.607	62.467	45.455	59.091	335
797	LInD5-76	Chr05	14955495	16031284	TTTGCATTTAGGTCCCTTGCCG	AGTTGGTGACCTCTCTTGCTCC	22	22	61.722	61.936	50	54.545	342
798	LInD5-77	Chr05	15158297	16290635	CTTTGCGCCACATGATCGATCC	TGATGACGAAGCTTGGTCCGAT	22	22	62.499	62.048	54.545	50	341
799	LInD5-78	Chr05	15227362	16335562	AGGCGCGTAATCTTTGGCTTTC	GCAAAAGGGGAATGCTTGTGCT	22	22	62.077	62.505	50	50	302
800	LInD5-79	Chr05	15393532	16503298	AAGAAGAGATCAGCACCTGC	ACGCCTCTTCCTCCTCCTCC	20	20	61.885	62.258	50	50	323
801	LInD5-80	Chr05	15407709	16517823	TGTTGTACGCAAAAGTTCCAACCT	TGGAAACACGAAGCGACCAGAT	24	22	61.641	62.495	41.667	50	324
802	LInD5-81	Chr05	15617613	16753977	TCAATTCAAACTCGATATAC	AGACATGCTGATATGCGGTC	20	20	62.109	62.187	50	54.545	339
803	LInD5-82	Chr05	16903322	18160067	ACCGTACGTACGTATACGTG	TACTGGCTAACCTTGATCAG	20	20	62.03	62.202	54.545	59.091	301
804	LInD5-83	Chr05	16919263	18175328	ATATCAAGATGCGCAATGCCGG	GCGAACCTCTGGTACCCTTCTT	22	22	62.019	61.995	50	54.545	332
805	LInD5-84	Chr05	17111501	18385636	GTTGTAAGTCGACACAGGCT	CGCAATCCCCATCTCACTCT	20	20	61.992	62.118	54.545	54.545	335
806	LInD5-85	Chr05	17164292	18454352	GCAGCAAGCTTGTGTGTATAGGA	GCTGCGATTTCATATAGCCACGT	23	23	61.175	61.651	47.826	47.826	347
807	LInD5-86	Chr05	17472405	18800196	TTTTTCCTTGTCAGCCTGCAGC	AGTTTCAAGTCTTCAGGGGCCT	22	22	62.168	61.568	50	50	310
808	LInD5-87	Chr05	17611763	18950790	TCACTTGCACTGCTACTGCCAT	TGTGCCCAGGATATCTTTTGAAGC	22	24	62.519	61.409	50	45.833	327
809	LInD5-88	Chr05	17653456	19003103	GCCATGCCGCATCGTAAATACA	CCGTCGTTGCTGCTACCCTATT	22	22	61.947	62.674	50	54.545	344
810	LInD5-89	Chr05	17817038	19183306	TCATCATGGCGTGAAAACACCC	GCGTACTTAGCACTGCAGTCTG	22	22	61.713	61.547	50	54.545	308
811	LInD5-90	Chr05	18780240	20443829	AAATAGGAATGGAGGCGAGGGG	ACTCAGAGCCTTGACAGTTGAGA	22	23	61.889	61.258	54.545	47.826	305
812	LInD5-91	Chr05	18809601	20472624	ACACCAGGAACGAGTACAAC	CAGCCTCTGCAATACTCATC	20	20	62.083	62.118	59.091	50	345
813	LInD5-92	Chr05	19724087	21213864	AGCGAACAGGCCGTAAAGGTAA	GACGTCCCTCTTCCTTCCTCAC	22	22	62.245	62.04	50	59.091	335
814	LInD5-93	Chr05	19725652	21215485	TGCAAGTATTGTATACAATC	CTACTAGAGAGAGCAAGAAG	20	20	61.888	62.059	50	54.545	325
815	LInD5-94	Chr05	19730114	21219678	CATCAACCTCCACGAACATGCC	AAAACGAGGCAAGACACACGAC	22	22	62.081	61.874	54.545	50	326
816	LInD5-95	Chr05	20270205	21936858	CTGCCAACCTGCCTCCTCAT	TCCTCCTCCTCCCTCCTCTAGA	20	22	62.208	62.082	60	59.091	337
817	LInD5-96	Chr05	20409037	22057617	CCCTTTCAATACGCGCTCGATC	ATACCATCTGCGGATCAGGACG	22	22	61.982	61.977	54.545	54.545	347
818	LInD5-97	Chr05	20455805	22088332	ACAGTGTAGTGGCCGATCAGAC	TAGCCCCATGTGGTTATGTCCG	22	22	62.039	62.132	54.545	54.545	350
819	LInD5-98	Chr05	20568794	22193618	AACATTGGCAAATACGCAAC	TGACGAGCTTAGCAACGATG	20	20	62.26	61.962	54.545	54.545	326
820	LInD5-99	Chr05	21482067	23171952	AGATTCACCGGATCTAGCAG	GTATTTCTACTTGGACTCTTC	20	21	62.02	62.048	50	54.545	332
821	LInD5-100	Chr05	23977099	25568196	ACCGCCAGACTTGTGGGTTTAT	AAAGGGGTGCACTTATTTCAGGA	22	23	62.212	60.181	50	43.478	327
822	LInD5-101	Chr05	23989563	25579578	TGCCATGCAACGATACACACTG	TGTGTTCTCTCGTCCAACTGCA	22	22	61.76	62.109	50	50	343
823	LInD5-102	Chr05	24137888	25763766	TTGCTTGCACTCTATTTGTG	GAGATAAAGTCAGACTCCTA	20	20	61.002	61.543	54.545	50	346
824	LInD5-103	Chr05	24170306	25794937	AGGACTACGAATCTGGACGGAG	CAGCGTACTTTCACCACGACAC	22	22	61.006	61.978	54.545	54.545	335
825	LInD5-104	Chr05	24423809	26042620	GCTGAGTTGGCCACCCTCAG	TTAACAGAAAGCTGAGGTAG	20	20	61.951	61.782	50	50	312
826	LInD5-105	Chr05	24554136	26170804	TCAGGAACAGATCGGCTTACGT	AGGCCATCAGCTATGTAACTTAGCA	22	25	61.464	61.921	50	44	340
827	LInD5-106	Chr05	24611286	26227655	ACTGAAGAAGAGCCGATCGGTC	TCCAAATGGGGGAGGGAATCAG	22	22	62.094	61.776	54.545	54.545	314
828	LInD5-107	Chr05	24669303	26280975	ATAACCGCTGAGCTTCCCCA	GCACTGGCATCCATAGCATC	20	20	62.086	61.706	50	54.545	323
829	LInD5-108	Chr05	24720715	26355923	AGAGAAAATCACTTCTACGCCCCT	CACATGGTAATTTCAGACGGGGC	24	23	61.606	62.034	45.833	52.174	342
830	LInD5-109	Chr05	24722926	26358177	AATACGCTGAAGAGCCTCCTCG	TCTTCATGTCTTCACCACCTCTTGA	22	25	62.159	61.687	54.545	44	311
831	LInD5-110	Chr05	24765742	26385946	AAATGACACCGTTGCAACTCCA	GGTTGACCTGTAGTGGTGAGAGT	22	23	61.268	61.569	45.455	52.174	322
832	LInD5-111	Chr05	24773993	26394245	GCCATGTAAGCAATGTTCCCTACC	ACTATGGAACGTGGGGACTTCA	24	22	61.995	61.09	50	50	350
833	LInD5-112	Chr05	24888949	26500019	ACAACCGCACTCTCCCGAATAG	GCACCCCATTGTTGTCTGTGTT	22	22	62.357	61.854	54.545	50	303
834	LInD5-113	Chr05	24918921	26530845	GTCAGCCCCCATCATCTCTCTC	GAGACAACGACGGATTTGGGTG	22	22	61.93	61.749	59.091	54.545	341
835	LInD5-114	Chr05	25111282	26750266	ATCGAGATACGCCAGCGATACG	TCCTTGCTTTGATGTTGCCAGC	22	22	62.368	62.233	54.545	50	308
836	LInD5-115	Chr05	25167649	26812714	CGCTCATTTCTCACGGTTGACC	CTCGCGGCAGTAAAAAGAGCAA	22	22	62.056	62.001	54.545	50	323
837	LInD5-116	Chr05	25214749	26863660	CAGAGCCTTTGGACCGAGCTAA	GCAACCGGGGGAATCTTTTTGT	22	22	62.308	61.927	54.545	50	310
838	LInD5-117	Chr05	25225253	26874271	CCACTACACTCATCTTCACC	GTCTTTAGTCCATGTAGATG	20	20	62.411	60.617	50	43.478	319
839	LInD5-118	Chr05	25417355	27069808	ACTTAACCCTGCATTTTCCGCC	GTTCAAGAGGAATGGATGCTGCA	22	23	61.723	61.432	50	47.826	349
840	LInD5-119	Chr05	25425906	27078135	TATTATCCACCGAGACCGACCG	AGATGGGCCCTAAGCTTCAGAC	22	22	61.388	61.816	54.545	54.545	320
841	LInD5-120	Chr05	26126168	27807650	TCCGAATCCGAAAATTTTCCGGA	CGGTAGCAAATTTGTAAATGCCCC	23	24	60.869	61.208	43.478	45.833	303
842	LInD5-121	Chr05	26181660	27863104	AGCGTCGGCGTCGAGATTTC	AATTCCATAGAGATTGCAAG	20	20	62.016	60.34	54.545	40	316
843	LInD5-122	Chr05	26336116	28014498	CCAGCAGCATCGACAGTTCAC	CCACCACATCTTAGGCCGATCT	21	22	61.856	61.869	57.143	54.545	336
844	LInD5-123	Chr05	27316495	28826375	ACGGAGGGAGTAGGTACGTAGG	GCGGGCGGGTATTAGGAATACT	22	22	62.131	61.99	59.091	54.545	336
845	LInD6-1	Chr06	13476	26304	GCATGGACCAATCGAATTCCGG	CGGCAAGGTCACCGTCAACTAA	22	22	62.206	63.048	54.545	54.545	317
846	LInD6-2	Chr06	151086	176801	CCCCTCTATGTACCCCACACAC	AGGTATTGGAGATAGGGGCGGA	22	22	61.808	62.186	59.091	54.545	320
847	LInD6-3	Chr06	181292	193272	CGAGCGTGAGTCAGTACTGTGA	ACACGGAAACTCATGGTTGTGC	22	22	62.003	61.896	54.545	50	340
848	LInD6-4	Chr06	195838	207945	CAGCTTCTTCCGTCCAACATCG	GTCATCGATGACGGCACTAGCT	22	22	61.807	62.462	54.545	54.545	321
849	LInD6-5	Chr06	324780	331052	TGCACCAAGTGAACTTACACGC	CGACATTAACACGATCGCCCTC	22	22	61.883	61.668	50	54.545	330
850	LInD6-6	Chr06	354827	375069	ACATGGGTCGCTGACATATGGT	CCGTTTCAAAATGTTTGACACCGT	22	24	61.811	61.201	50	41.667	307
851	LInD6-7	Chr06	422092	443688	GTTGGCTTCGCAATCACCTCTC	TCACGGGGTCGGAGTACTAGAT	22	22	62.071	61.815	54.545	54.545	348
852	LInD6-8	Chr06	423209	445289	CGAGTACTCGTACTTCCGCCTG	GCGTGTGGCATGCAAGATATGA	22	22	62.427	61.889	59.091	50	345
853	LInD6-9	Chr06	524556	539535	TTTGGGACGGAGGTATTACTTAGC	TGCTCTCTAAACCCTAGCTGCTG	24	23	60.142	62.001	45.833	52.174	349
854	LInD6-10	Chr06	550583	566050	GTGGTCGCTAGCTTCCTTTTGG	CTCTGTCGAAGTCCTGCTGTGA	22	22	61.762	61.966	54.545	54.545	327
855	LInD6-11	Chr06	683441	692109	CTTGGTGACTCTGCTGGCAAAG	TAGTGAGCGATCGACGAGCATG	22	22	61.959	62.495	54.545	54.545	347
856	LInD6-12	Chr06	709094	717315	GCACAGCTCGGTTCTTGCATC	TAGTTGGCACATCAGCATCAGC	21	22	62.445	61.26	57.143	50	300
857	LInD6-13	Chr06	730128	738321	GGCAATGAATCAGCCTTGGTCC	TGCGAGACGAATCTTTTGAGCC	22	22	62.107	61.498	54.545	50	306
858	LInD6-14	Chr06	785047	793500	CCTAGTACTGCAGTGCGGCTAT	TTTTGCCTCCCTCATGTCTCGT	22	22	61.911	61.941	54.545	50	311
859	LInD6-15	Chr06	965091	1133707	CCTCGCCGAACAAAAGAACTCC	ATAGAGCCCTCCAAAGCTGCTT	22	22	62.003	61.762	54.545	50	308
860	LInD6-16	Chr06	1017212	1188795	TCAGCATGTAATCCTGTATG	GTGTCACATCCAGCACTAAG	20	20	61.754	61.46	50	50	333
861	LInD6-17	Chr06	1105087	1275648	TACATGGCAGTTCAGTGCTGGA	CGAGCTTGTGTAATCGCTTTGC	22	22	61.94	61.034	50	50	317
862	LInD6-18	Chr06	1105905	1276516	GCCCGTTAATTCCACGTGAAGT	TCAGGCCTGTTTGGAAGAGTGT	22	22	61.446	61.821	50	50	329
863	LInD6-19	Chr06	1117722	1288830	TTGTCAGGTTTCCGTCGGGTAA	GCTCAACCATGTTTGCCTCCTC	22	22	61.863	62.031	50	54.545	341
864	LInD6-20	Chr06	1162817	1325426	CTCTCAGAGCAAGAAGGGGGAG	GCAGATGCATCCAGGACCCTTA	22	22	61.801	62.141	59.091	54.545	314
865	LInD6-21	Chr06	1221731	1384542	GGGGGTTCGGAGTCTAATTCTCC	ACGTAATTCCACTCATCGCCCT	23	22	62.068	61.799	56.522	50	348
866	LInD6-22	Chr06	1227219	1390075	GAACACACGGAACAAATAAACTTGC	AGCTTCCTGAAACAAAAGATGGTGG	25	25	60.052	61.961	40	44	319
867	LInD6-23	Chr06	1262250	1422369	GCATTGGCGTCTTCTGAAACGA	AGTACTTGACTCAGCTTGGCCA	22	22	62.001	61.615	50	50	321
868	LInD6-24	Chr06	1282226	1441891	TCAACAATTTGGACGTGGAAGAAGA	TGCTACCGTCAACACGTCCATA	25	22	61.148	61.716	40	50	350
869	LInD6-25	Chr06	1313007	1472487	TTCGTGACCTAACTGAACCGCT	GCCTGTAAACTGCGAGACGAAT	22	22	61.913	61.244	50	50	305
870	LInD6-26	Chr06	1358383	1517643	GCTCCATGGCACGAACTTGTAG	CCGCCACAACTTAAGACTTGCC	22	22	61.817	62.267	54.545	54.545	314
871	LInD6-27	Chr06	1625755	1805565	CTCGACCGCTCTAGGATGAGTC	ACTCCAAAGTCCGATCAGTTCCT	22	23	61.693	61.326	59.091	47.826	324
872	LInD6-28	Chr06	1705730	1881156	AGCCTGCATCACAATTGACAAACA	TTGGGGGAGCTTCTGATTCTCG	24	22	62.007	62.064	41.667	54.545	314
873	LInD6-29	Chr06	1713815	1889300	CTAGATTGGTGCCTTTGCCGTC	TACAGATCTGTAGCCAGCTGCA	22	22	61.826	61.213	54.545	50	333
874	LInD6-30	Chr06	1788747	1907367	GCACTTTGATGCTGTAACCT	ACACCTTAACCGGTCCAATG	20	20	61.12	62.212	47.826	50	302
875	LInD6-31	Chr06	1925251	2051668	CGCCAAAAAGTTCAGGTCTCCC	CTGATGAGCCGGACCATCCATC	22	22	61.962	62.816	54.545	59.091	348
876	LInD6-32	Chr06	1942164	2064560	TGGTCCACTTGTCTGTCTCACA	CACAGGGACTCCGTTGTACTCC	22	22	61.217	62.292	50	59.091	310
877	LInD6-33	Chr06	1987627	2109858	ATGTGGTATCTTAAGATGAG	TCATGAGCCTGTTTATAGAC	20	20	62.018	61.873	54.545	50	348
878	LInD6-34	Chr06	2176447	2251807	TGGAGTTTGGAGGAGCTCAAGG	GTTCTTGCCCAACTTCCTGGTG	22	22	61.945	61.91	54.545	54.545	350
879	LInD6-35	Chr06	2213783	2294944	AAGGCCAATACTCCTTCGCCTT	ATTAGCAGCAAGGAAAGCACGG	22	22	62.019	61.773	50	50	350
880	LInD6-36	Chr06	2595470	3006790	GACGTCAGGAGAGAAGCTAGGC	CCACATGTCATCCTCACCCCTT	22	22	62.148	62.023	59.091	54.545	318
881	LInD6-37	Chr06	2652286	3063696	AGGTCTCCAAGACTTGTCGTGG	CGATGGGGATTGGTTTTTGCGA	22	22	61.921	62.032	54.545	50	342
882	LInD6-38	Chr06	2668601	3080007	CCTCAACGAAGCCGAACTTGC	TCGACACCTCTAAAACCCTCGC	21	22	62.373	62.287	57.143	54.545	335
883	LInD6-39	Chr06	2755449	3266593	ACGCCGACCAATCTACTGGC	CACATAGCACAGCTTGCCAC	20	20	61.989	61.884	50	54.545	308
884	LInD6-40	Chr06	3145890	3666636	TGACGTAATATGGTGAGAGGGGT	CAGGAATGACGGTTTGATTGGACT	23	24	60.629	61.342	47.826	45.833	350
885	LInD6-41	Chr06	3166306	3687012	ACAAGTTGCTGTTGACTGGAGT	GCTTGGCTTAGTTGCACCAGTG	22	22	60.356	62.525	45.455	54.545	348
886	LInD6-42	Chr06	3862938	4673631	CGCGCTAATAAATTGCTCCGGT	GGCGTGCCAAGAAGTCAAGAAT	22	22	61.938	61.709	50	50	303
887	LInD6-43	Chr06	3903134	4714072	TGGATCACGGTGACAATAAC	ACTATGTTAACCCAAATGAC	20	20	62.159	61.782	54.545	50	350
888	LInD6-44	Chr06	3932759	4746025	GTGCCTCTGCCGATGGAAAATT	CACATCTGCCCACTCGAAAACT	22	22	61.783	61.13	50	50	341
889	LInD6-45	Chr06	4074376	4850864	AGTCACTGACATGTGGACTCCG	CGAGCCCAAACCAATTCAGTCC	22	22	61.977	62.027	54.545	54.545	347
890	LInD6-46	Chr06	4125514	4901932	ACTCATATCAAGCCCACCTAGGT	ACCATTTATTCCCTTCATGGCACC	23	24	60.634	61.423	47.826	45.833	307
891	LInD6-47	Chr06	4143085	4919485	TCTCCTCTCTTTCGGCTCTCCT	TGTGAGCCGTCTATTGGAGAAGA	22	23	62.025	61.128	54.545	47.826	335
892	LInD6-48	Chr06	4153540	4931188	GCTCCAGCAAGGACTTTCAACT	GATGCACACAGCTGAGGAAGGA	22	22	61.073	62.572	50	54.545	300
893	LInD6-49	Chr06	4986822	5642703	ATTTGATACCATGGTGCCCGGG	AGCAACTTCAATTCCGGACAGA	22	22	63	60.225	54.545	45.455	317
894	LInD6-50	Chr06	5225737	5874080	GCTATTTACAGTTTGGTCAG	TGGAAGCAGGAGTAAATCAC	20	20	62.238	61.687	54.545	54.545	325
895	LInD6-51	Chr06	5240598	5890549	ACCAAAAACAGGCCCCAAACAG	TACCGGCTCAGTTTTCTGGAGG	22	22	62.069	61.993	50	54.545	305
896	LInD6-52	Chr06	5241755	5891716	CCACCCCACCCTCTCTTTAGAC	GTTTCCATGTGCCCTCAAACGT	22	22	61.746	61.906	59.091	50	312
897	LInD6-53	Chr06	5364452	6004242	AGTTGTGTGTATGGATGCATGCA	CATGAAAACGGTCGGCACATGA	23	22	61.124	62.011	43.478	50	304
898	LInD6-54	Chr06	5648707	6304203	CGAACTCACTGCCGAATGATGC	GCGCCCCCAAAAGGACTATTTC	22	22	62.422	62.099	54.545	54.545	311
899	LInD6-55	Chr06	5745813	6422148	CGAGCCAACTAGCGAGCCTATT	TGTGGGCTTAAGTGATTTCAGCA	22	23	62.475	60.75	54.545	43.478	344
900	LInD6-56	Chr06	5767120	6459060	GCTCGGATCCAACACAAGATGC	CCCCCATCTGACCAAGGAGATG	22	22	62.135	62.146	54.545	59.091	338
901	LInD6-57	Chr06	5810776	6479381	GTGGTGACTGGTAAAAGCTGCC	AAAAGGGAGGGTGACTGACAGG	22	22	61.962	61.889	54.545	54.545	310
902	LInD6-58	Chr06	5885928	6545501	CCTTGAGGTAGGCAGGGTGATT	TTGAGTCACGCAATGCTTAGCA	22	22	61.758	61.128	54.545	45.455	332
903	LInD6-59	Chr06	5942906	6581147	CGACCTCACACCGTCAGAAGAT	GCTGGACACACCTCTGATCTGT	22	22	62.028	61.991	54.545	54.545	316
904	LInD6-60	Chr06	6371628	7006724	ACTGGTCTTACCTCTCGTACACA	ACTTCTCTTCTCCACCTCATCACT	23	24	60.497	60.756	47.826	45.833	350
905	LInD6-61	Chr06	6463182	7099046	CGCAACCATAAGTTTTCGTGTCC	CAGCGTCATGATTCACGAGTCG	23	22	60.908	61.902	47.826	54.545	349
906	LInD6-62	Chr06	6463607	7099506	TCCACTTTCCACACTCTAGCCA	AGCAAGTACAATAGCAGGCTACAA	22	24	61.025	60.323	50	41.667	325
907	LInD6-63	Chr06	6644493	7234659	ATACATACTCACCGGCAGAAGCA	GTTTAGCAGTTTAAAAAGCGTGTGC	23	25	61.756	60.554	47.826	40	300
908	LInD6-64	Chr06	6670395	7260482	ATCATGTTTCCTGTAGCTTC	CTATATGCAAATCTCCTCAC	20	20	61.8	62.034	54.545	50	340
909	LInD6-65	Chr06	6939450	7461942	AGCAGAAAAGATACAGCCCCGT	ACACCAGGATTTCACTAGCCCC	22	22	62.009	62.019	50	54.545	330
910	LInD6-66	Chr06	6949861	7471774	AAAGGGTCCGTCACGTACTCTG	TCGTCGGTGGCATCTTTCTGAT	22	22	61.969	62.048	54.545	50	333
911	LInD6-67	Chr06	7409980	8735994	CAAATGTGCCTTCGTGCTCACT	GTAGTTCATCTACGAGCACCTTGT	22	24	61.955	60.381	50	45.833	325
912	LInD6-68	Chr06	7910705	9242054	ACATTTTGGGATGTAGGGAG	AAGGAGTTGTTACATGTTGG	20	20	61.83	62.631	48	59.091	337
913	LInD6-69	Chr06	7939780	9269365	AGAATAGCGGTAGTCCCACACG	GGCAACGGCGTTGTTTTCTCTC	22	22	61.842	63.048	54.545	54.545	300
914	LInD6-70	Chr06	8505784	10011508	GTGCAAACTGTCTCAGCTACGG	ACTTGGCACCATGTCAGGTCAT	22	22	61.744	62.22	54.545	50	349
915	LInD6-71	Chr06	8510143	10022347	GGTACCACCTCCTCCATCCCTA	GACAGTTCGTCGTCCTCCATGA	22	22	62.118	62.024	59.091	54.545	301
916	LInD6-72	Chr06	8561066	10069547	GGAGCTTTGTTACTCCCTCCGT	AGACATGGTAGGAGACTATTGCCA	22	24	61.995	60.88	54.545	45.833	315
917	LInD6-73	Chr06	8591382	10100142	AGACTTTCACCGTGTTCAGATCCA	GCCGTTTAGCCGTTTGAAAAGC	24	22	62.015	61.728	45.833	50	330
918	LInD6-74	Chr06	8619714	10128505	TCGTTTCGCTTGGTAGGATCGT	AATTAATTGCTGCAGTGCGCGA	22	22	62.03	62.33	50	45.455	333
919	LInD6-75	Chr06	8745277	10260156	ATTGATATGTGACATGCGAG	GTGCTGTCGTCAACATCGGC	20	20	61.983	62.022	54.545	54.545	328
920	LInD6-76	Chr06	11631514	12992865	GGGATTCTCGACTCAGCGAG	ACAAGATTCACATATTCCAC	20	20	61.85	62.014	59.091	54.545	311
921	LInD6-77	Chr06	11641249	13002568	CCCTCACGATCAACACAACACC	AGACGCGTCGTTTTGGTTCTTT	22	22	61.696	61.565	54.545	45.455	331
922	LInD6-78	Chr06	12445653	13512781	CGCATGCTAACTTGAGAATCGGA	TCCATCCATTTTCTCCCGTGCT	23	22	61.285	62.018	47.826	50	307
923	LInD6-79	Chr06	12799797	13942703	AGACTTTATCTGAGAAAGAC	TGCCTTGCACCCCTCCCTAG	20	20	61.154	61.868	50	54.545	326
924	LInD6-80	Chr06	12850910	13982813	ATTGGCAGTAACATCGTGGTGA	CGCGGTGATTTCGGGAGTTTTT	22	22	60.29	62.262	45.455	50	300
925	LInD6-81	Chr06	13082434	14111705	ATTTGCATGGCCCTATTGCAGC	AAATTCCGGGCGTGACAAAGTC	22	22	62.443	61.958	50	50	345
926	LInD6-82	Chr06	13445360	14379802	ACGTCATCAACGATCTCATC	GGAATAGGAGGATCTAGTTG	20	20	62.674	61.638	54.545	54.545	335
927	LInD6-83	Chr06	13657395	14850321	TGGCACCGCATTTCTTTTCCAA	AGAGGATTGATGGCCCAAAAGGA	22	23	61.859	61.926	45.455	47.826	346
928	LInD6-84	Chr06	13707402	14896788	CGGCGTAAAGGGACAGTAGGAT	GAAGGGGAGGAGGAATAGGGGA	22	22	61.852	62.134	54.545	59.091	308
929	LInD6-85	Chr06	13879230	15472509	CGGCTACCAGTTGAGCAAGCTA	TCCGAACTTCCATTTGGTCCGT	22	22	62.613	62.195	54.545	50	342
930	LInD6-86	Chr06	13955046	15329369	GTTGTGGAGGTTAGGGAGGTGG	AGCAACAGTAGTCGTGCCTCTT	22	22	62.267	61.921	59.091	50	341
931	LInD6-87	Chr06	14024496	15514805	TTGTGAGTAGTGGCAGCCTC	AGGATGGGCAGGGAAGATCA	20	20	61.874	62.091	50	54.545	343
932	LInD6-88	Chr06	14273227	15676005	CCACATGTTGACTAACCAATCGCA	ACGTGGAGATGATGAAGGTGTGT	24	23	61.864	61.883	45.833	47.826	322
933	LInD6-89	Chr06	14291587	15711946	ACCGGCTCATCAACCAGCTAAT	TGTGTATCTGCTAGACCAGGCC	22	22	62.075	61.54	50	54.545	309
934	LInD6-90	Chr06	14434308	15968675	TCTGCACCTATGAGCAACAGGT	GCACAAGCGAATCCATCACCAA	22	22	61.681	62.026	50	50	306
935	LInD6-91	Chr06	14507631	16016305	AGTAACTTGTATGAGTGTTG	TGGCTAGCGCTAAGGTTAGAG	20	21	62.075	62.125	54.545	50	327
936	LInD6-92	Chr06	15022649	16556682	CGTTGTGAAACGGAGGGAGTAA	CACAACTTGCCGCCTCTGAAAA	22	22	60.546	62.152	50	50	309
937	LInD6-93	Chr06	15023949	16557976	TATGTTCGGCGGCAAGTTTTCC	TGGGTATAGATTGCTGCTGCGT	22	22	62.018	62.125	50	50	337
938	LInD6-94	Chr06	16157748	17787776	AAGAAACGATGGAGCTGGTAGC	TTGTGGGCCTGATCGATTGAGT	22	22	60.678	62.007	50	50	320
939	LInD6-95	Chr06	16645616	18366060	TCGCATTCTTTTTGGATGGTGGT	GGAGACGACCAAATTGACAAGGT	23	23	61.316	61.055	43.478	47.826	342
940	LInD6-96	Chr06	17221823	18873284	CAGTTCAAACTTGCGTTGAACTAGT	AAAATGGAGCAAAGCATCGGGG	25	22	60.447	62.052	40	50	337
941	LInD6-97	Chr06	17685679	19371393	AGAGACGTACGGGTGTCCTGTA	TCGTCTCACAATTTACAGGCGA	22	22	62.258	60.03	54.545	45.455	342
942	LInD6-98	Chr06	18071556	19717691	TTCCAGGTACAAGACTCATG	CCAAACCGGATATATGCAAC	20	20	62.19	61.74	50	50	342
943	LInD6-99	Chr06	18118753	19764932	GTTGTGCCTCTGTAGGTGTTGC	GAGGCTGAACTGGACTTGGACT	22	22	61.952	61.936	54.545	54.545	348
944	LInD6-100	Chr06	18180059	19823500	TGTAGGATGACGAGCCAGCTTC	GAAGAGGACTTCGTCGACGTCC	22	22	62.104	62.615	54.545	59.091	311
945	LInD6-101	Chr06	18284680	19938727	AGGGGGAAAGGTGACTAAAGGC	AGCATGGACTCAAGACACAGTGT	22	23	61.963	62.074	54.545	47.826	320
946	LInD6-102	Chr06	18339158	19991108	GGACATAGAATACCGTCGGGGG	GGCTTTGCAGCTTTCTGACTGT	22	22	61.98	61.904	59.091	50	314
947	LInD6-103	Chr06	18357502	20009446	AGTGGCTGTGAACCAATACCAA	AACATGCAAGTGAGAAGACGCC	22	22	60.159	61.7	45.455	50	346
948	LInD6-104	Chr06	18712736	20438392	CTCATTGTTGCCCCTCTCTCCA	ACAGGTTGTACACGCATTTGGC	22	22	62.012	62.213	54.545	50	336
949	LInD6-105	Chr06	18740430	20465948	TCTCCTGGGTACACAAGCTTGG	CCAACGGCGATTGTTTCTCGAT	22	22	61.941	61.813	54.545	50	310
950	LInD6-106	Chr06	18783347	20498083	CTGACTCAGCCACCACGTAGAA	TGGAGGAGTCGAAACCACCATC	22	22	61.972	61.993	54.545	54.545	349
951	LInD6-107	Chr06	18822965	20533934	GAAACCATCTTTCGTCGGTCGG	AAAGATCCCCGTCTTTAGCCCC	22	22	61.801	62.083	54.545	54.545	312
952	LInD6-108	Chr06	19055299	20742623	AGACCTTGGTGTTCGCATAGACT	TGATGCAGAGTACATGATGAGCCA	23	24	61.632	61.96	47.826	45.833	307
953	LInD6-109	Chr06	19059041	20746217	AGATGATGGATTGGACGGCCAT	TCAATGCCTCCACTTTTCCTCCA	22	23	61.892	62.102	50	47.826	301
954	LInD6-110	Chr06	19123106	20784135	GCTGGTTCCCAACTCTATTC	CAACCATATAGTAGGTGTAC	20	20	62.152	61.908	50	48	310
955	LInD6-111	Chr06	19189621	20860408	CGCACACCCTGAAAACGAGAAG	CGGCAACATTCGCATCTACTCC	22	22	62.243	61.932	54.545	54.545	338
956	LInD6-112	Chr06	19192172	20862914	TCGGTATCTGCATGCATTGTCTG	CAGACAGGGGAGTTCATGCTCA	23	22	61.293	62.001	47.826	54.545	337
957	LInD6-113	Chr06	19269052	20908799	ATTCGCTTGTCATAGTTGGC	TCATACACCAGTACACCACG	20	20	62.13	62.298	50	54.545	310
958	LInD6-114	Chr06	19269587	20909375	TGTCGCCTTGGTGGATATCTAT	TGTGGTGCCACTCATTGCAA	22	20	61.482	61.796	45.833	45.455	321
959	LInD6-115	Chr06	19272989	20910768	TGCATTGGTAAGTTTTCCCCCT	ACTATGCAAGCCATCTCCCAAGT	22	23	60.158	61.971	45.455	47.826	302
960	LInD6-116	Chr06	19315791	20955507	TTCAAATCCACATGCGGGGAGA	GTCACTTAGGTAGGGTGTATGGCA	22	24	62.277	61.66	50	50	305
961	LInD6-117	Chr06	19972772	21558789	ATTATTGCCCCATCCCGAAG	ACTACGTCGCCACCGTCGTC	20	20	62.024	61.968	54.545	50	301
962	LInD6-118	Chr06	20339895	21757048	TCTGCAGGATTTAGGACGTGCT	AGTCATGGCGTGATGATCAGCT	22	22	61.736	62.123	50	50	343
963	LInD6-119	Chr06	20627810	21989774	GGATCAGCCTACCTGTCAAGCA	AGGTTAGCTCACCGTGGAAAAGT	22	23	62.064	62.078	54.545	47.826	300
964	LInD6-120	Chr06	20935229	22092700	CATCGGACGCGAGGATGAAC	AATCCGATTCACCATAGCGC	20	20	62.072	61.934	50	50	320
965	LInD6-121	Chr06	21026498	22183343	ACGTCAACAGCCAGAAACACTT	TCACCAAGAATGCAAATTGCCTCT	22	24	60.94	61.538	45.455	41.667	322
966	LInD6-122	Chr06	21061435	22204949	TTTGGTGTGGTTTGGTTGGGTG	AAACCGCACGGATCCAAACATC	22	22	61.998	62.022	50	50	309
967	LInD6-123	Chr06	21073274	22227991	TGGCTATTGGGGTAGAAGTGGT	GTACTGGTGCTTCCCCAAATGC	22	22	60.833	62.038	50	54.545	312
968	LInD6-124	Chr06	21167531	22293212	GACATGCCGATATCGTGACGTG	CGAGAGTTGGTTTCAAAGTCACCG	22	24	61.722	62.3	54.545	50	350
969	LInD6-125	Chr06	21204797	22353182	TGGAGCAGAGCTTAAGGTGTGT	CGAAGGGCAAACATTCCTGCTT	22	22	61.615	61.976	50	50	343
970	LInD6-126	Chr06	21237826	22386088	AGCACATCAAACAACACACGGT	TCACCGAGTGATTTCAGAGGCT	22	22	61.52	61.41	45.455	50	304
971	LInD6-127	Chr06	21258362	22406684	CCACACAGAGAGAAAGGGGGAG	CTTTGCTTTGCGCCGTCAATTT	22	22	62.002	61.678	59.091	45.455	305
972	LInD6-128	Chr06	21315432	22463680	GGCCCCTTTGTTTTACAGCAGT	GAGAGCAAGCGAGGCAAATCAG	22	22	61.603	62.128	50	54.545	320
973	LInD6-129	Chr06	21696535	22855362	GTCCGAGACCCAGAGAGAGAGA	ATCTTGGCTTCTTGGCTGGACT	22	22	62.066	61.96	59.091	50	343
974	LInD6-130	Chr06	21715896	22875959	CCCACAGTAACGCGCAGATATC	AACGACTGGTACGAGCTCAAGG	22	22	61.427	62.28	54.545	54.545	350
975	LInD6-131	Chr06	21746715	22907429	GGACTTTTCTTCTTCGGTGG	TCCGTCAGTAAACAGCGAAACA	20	22	61.648	60.482	52.174	45.455	330
976	LInD6-132	Chr06	21760967	22927049	GCAGTTTGAAAAGCGTGTCACG	GGTGATCACCCTCTGTTCCACA	22	22	61.651	61.941	50	54.545	326
977	LInD6-133	Chr06	21784372	22954774	GTGCACCCCAGCTGAATCTTTG	CTGTAGGAACCGTGCATGGG	22	20	62.287	62.055	54.545	54.545	311
978	LInD6-134	Chr06	21953356	23103376	TCTTCCTCTCCTCCTAGCAG	AGATGTATAGCTTCTCCCAG	20	20	61.83	61.944	54.545	59.091	323
979	LInD6-135	Chr06	22375037	23580886	ATCTTACCCGGTGCAGGAAAGG	CATCCGAAGTGGGTTAGGAGCA	22	22	62.333	62.059	54.545	54.545	303
980	LInD6-136	Chr06	22432380	23631463	TGTTCCAGTACCGTCTTCACCA	GTGCTAACCCAAACTTCATCTTC	22	23	61.279	61.496	50	44	349
981	LInD6-137	Chr06	22502461	23705015	ACCCCTCACTTTGCTTTAGG	ACTCCTCCACTCTTTACGGCAA	20	22	61.899	61.348	50	50	302
982	LInD6-138	Chr06	22506735	23709363	CGAAGTCAAGATGGCCGAGTTG	AATTTTTGGCCGTGGTGTGGTT	22	22	61.807	62.065	54.545	45.455	316
983	LInD6-139	Chr06	22535243	23737809	TATGAGGGTTAGTGCTGGTGGG	AATGGGAGCCTTGAAGTTACAACT	22	24	61.489	60.448	54.545	41.667	326
984	LInD6-140	Chr06	22708040	23911232	TGTGGGGGTTTCGATGAAATGC	TGTCGTCGCCTCTTTCTCTACC	22	22	61.722	61.768	50	54.545	324
985	LInD6-141	Chr06	22710206	23913413	TGGGTATCGTACACTCATCCACA	TGCATCCTCGTCGCACAAATTG	23	22	60.879	62.317	47.826	50	347
986	LInD6-142	Chr06	22758324	23974304	AGGGAGAAACGGAGGGAGTA	CCACATCAACGCCACGTGTA	20	20	61.975	61.943	54.545	50	336
987	LInD6-143	Chr06	22758987	23974923	CTGAAATGGCGATGGCGATGG	ACGAAGACGGAGGAGACCAAAG	21	22	62.327	61.973	57.143	54.545	350
988	LInD6-144	Chr06	22768634	23985878	ATCTCATCCGCGAAAAACTG	AGCTGATGATGACTTCGGGC	20	20	61.826	62.068	50	50	306
989	LInD6-145	Chr06	22799795	24017383	GTACTACCACATGCTCCCTCCG	TTCCGTGAGATGGTAGAGTGCG	22	22	62.166	62.088	59.091	54.545	344
990	LInD6-146	Chr06	22848498	24040695	AGATAGGAGTACCAATCATC	TGTTAGCAGCTCCGATGACC	20	20	61.871	61.817	50	54.545	310
991	LInD6-147	Chr06	23729480	24852337	GGCTGCATCATTCCTAACGCAA	TTGACGCGTGATGCTTAGCCTA	22	22	61.835	62.351	50	50	334
992	LInD6-148	Chr06	23904778	25027522	AGGCCATCAAGAAGGACATGAAA	GGCCGATACTACCTGCGAGATT	23	22	60.245	61.973	43.478	54.545	316
993	LInD6-149	Chr06	24433127	25498706	TTGATGGCCGCAAGAGAGGTAA	GCTGCTTAGCATCATCACGTGG	22	22	62.003	62.187	50	54.545	342
994	LInD6-150	Chr06	25003081	26240013	ACGGAGGCTGGCGATGAATC	ATCCTCCTCCTCCCACACTTCT	20	22	62.651	61.994	60	54.545	328
995	LInD6-151	Chr06	25011159	26249243	TGTGTGCACGTACCGGATAC	GCAGTTGCGTAAAGCGTCTG	20	20	62.227	62.01	50	54.545	323
996	LInD6-152	Chr06	25021329	26259054	ATCTCTCTGGAACACTGGCACC	CCTCTTCCTCTTCTCCTGCCAC	22	22	62.002	62.058	54.545	59.091	340
997	LInD6-153	Chr06	25650248	26886252	CCTGACATGATTGCGAACGGAC	CGAGAGATTGCTACGGACTGGT	22	22	62.119	61.836	54.545	54.545	325
998	LInD6-154	Chr06	25650294	26886256	CCTGACATGATTGCGAACGGAC	CGAGAGATTGCTACGGACTGGT	22	22	62.119	61.836	54.545	54.545	325
999	LInD6-155	Chr06	25669294	26901060	CCAAACATCTTCCCCCACTCCT	TCACCGTCAATTTCCGATCGGA	22	22	61.967	62.04	54.545	50	313
1000	LInD6-156	Chr06	25834942	27054628	TTCACGGCGTCAACATCATTGG	AATGGACCCTTTTTCAGCACCG	22	22	62.011	61.66	50	50	303
1001	LInD6-157	Chr06	26008049	27230653	GTTGCTCCATTGTTTGAATC	ATCGCATGAACTTGTTCCAC	20	20	62.036	62.312	50	50	345
1002	LInD6-158	Chr06	26152414	27369603	GCTAATGGACCGCTCCGTTTTC	TGTGATGGAGTGGCATGGTTCT	22	22	62.127	61.955	54.545	50	349
1003	LInD6-159	Chr06	26181533	27391034	TGACGAGAGGTTGCCGATCATT	GGTGCAAGCGTTTACAATCCCA	22	22	62.048	61.967	50	50	315
1004	LInD6-160	Chr06	26257608	27464845	ACTGGCTTCAGACTTCAGAGTTCA	TGATCTGTACAGGAGGAGGTGGT	24	23	61.72	62.18	45.833	52.174	300
1005	LInD6-161	Chr06	26317710	27520171	CCATGTGATGGGTGATGGGGTA	AGGAGTAGTTGATGCTTGGGCT	22	22	61.83	61.428	54.545	50	337
1006	LInD6-162	Chr06	26421480	27615065	ACAAAGTGGGGCTTTCTATGTGC	CAGTGAAACGTCAGCATGCAGT	23	22	61.623	61.945	47.826	50	350
1007	LInD6-163	Chr06	26602972	27803353	TCCGCCCGATCAACTGTTAGAA	AGCCATCCAAACTACATTGACACG	22	24	61.728	61.631	50	45.833	327
1008	LInD6-164	Chr06	27537783	28780031	GCTAGAGGGTGGTGCAAAGTAA	AGAGCTACCCACATGACTGGAT	22	22	60.29	60.628	50	50	350
1009	LInD6-165	Chr06	27640430	28879258	CGTGAAACTATGTGTAGACCTTCCC	TGCCTCTACGTACATCCAACCG	25	22	61.134	62.095	48	54.545	300
1010	LInD7-1	Chr07	94901	534139	GATGAGGGAGGGAGAGAATG	AGCGGATCCAAAGGGTGGTC	20	20	62.177	61.833	54.545	54.545	316
1011	LInD7-2	Chr07	103727	542940	ACCAAAACAACGGCGGAAGATC	AAGTCCTCCGCTACTTGTCGC	22	21	61.958	62.414	50	57.143	331
1012	LInD7-3	Chr07	119968	558640	CGTACGACAATGAATCTGCTCCT	TACGTACATGTCCATGGTGGGC	23	22	60.735	62.376	47.826	54.545	350
1013	LInD7-4	Chr07	132706	572408	CGTGGCATGAAAACCGGGTTAG	TGGCCCAACCTCTGAAGCTAAA	22	22	62.326	61.894	54.545	50	320
1014	LInD7-5	Chr07	207206	647001	CCTCGTGGCTCGGAAAACAATC	GGAAAACTTGCAGCTCCGTTCT	22	22	62.066	61.644	54.545	50	309
1015	LInD7-6	Chr07	213004	650576	ATCGTCCTGGAACTTGGTGTGT	GCTCGGTGCACTTGTGGAATAC	22	22	61.875	62.066	50	54.545	336
1016	LInD7-7	Chr07	215265	653178	TGGCGGAAAATATAGGCCCT	CACATCGAAGTTTTGGACAT	20	20	61.827	60.392	50	40	320
1017	LInD7-8	Chr07	225178	663096	CTGCTTGGTGTGCCTCCAAAAT	ACGGTTGTTGTTGCTGGTAC	22	20	61.924	60.942	50	45.455	334
1018	LInD7-9	Chr07	276836	710705	AAGATACATCATTGTGGCGGCA	GCTTTGTTGACTGCCAAATTG	22	21	60.683	60.989	45.455	43.478	346
1019	LInD7-10	Chr07	287478	721353	AGCTTAATCTGTCGACGGGG	AAAGGATCGGCACCTCCATTG	20	21	61.278	62.018	50	50	324
1020	LInD7-11	Chr07	292203	726128	TCAATGGAGAGGGAGAGCTTCC	ATCAGCCAAGATTGCTCCCTGT	22	22	61.223	62.027	54.545	50	349
1021	LInD7-12	Chr07	335098	763783	ACTGGTAGTTGAATGCCGACCA	GTCGGCAAGCAATTTGGTCGTA	22	22	61.937	62.008	50	50	322
1022	LInD7-13	Chr07	342337	771034	TGGTCCAAGCAAGAAGGTGACA	TGCATATGTATCGCTCCCTCCG	22	22	62.081	62.038	50	54.545	332
1023	LInD7-14	Chr07	449781	911576	CGTTTCACTTGCTCGCTCACTT	CCACATCCCTACCTCCGTCATG	22	22	61.932	62.181	50	59.091	332
1024	LInD7-15	Chr07	798557	1260429	AACCCCGTCCTGTCACAATGAT	ACTAGGTCGGTCAGCCTTATGC	22	22	61.952	61.856	50	54.545	316
1025	LInD7-16	Chr07	929612	1487419	ACTGCCGGTTCTTGTGTGAAAC	ACCGGTTCACAACTTAGAGCCA	22	22	61.832	61.871	50	50	348
1026	LInD7-17	Chr07	962261	1520117	CGTCACACCCACCCAAAATCTC	TGACTTTCGATGTAGAGGCTGGA	22	23	61.705	61.128	54.545	47.826	326
1027	LInD7-18	Chr07	1049895	1586421	CGAGTTGAGCTTGAGCTATG	TGACTACGAAACTACTGTTC	20	20	60.484	60.325	50	41.667	301
1028	LInD7-19	Chr07	1430177	1651803	AGCCACTGTTTCTAGTCGCCAT	GCAAGGCGATATTGGCACGTAA	22	22	61.998	61.883	50	50	313
1029	LInD7-20	Chr07	1518777	1732704	TCGGTCGTAGCTCAAAAACCCA	TTAATGGGCTGGACGGCTACAG	22	22	62.178	62.381	50	54.545	348
1030	LInD7-21	Chr07	1539630	1753518	GAGCCAAGCCAAGCCTAGTTTG	TGACGTGCCTTACATATGGGCT	22	22	62.031	61.807	54.545	50	301
1031	LInD7-22	Chr07	1580796	1798474	GGTGACATTTGTTAGTTGGTGTGC	TCCCAATCGAAAATGGAAGTGCA	24	23	61.027	61.064	45.833	43.478	315
1032	LInD7-23	Chr07	1634298	1846873	TTTGGTGTTTGCTCTGATGGGC	CGAGAGACCAACTCCCCACTTT	22	22	61.919	61.932	50	54.545	349
1033	LInD7-24	Chr07	1677725	1878331	TGTTCGGTTTGGAAGTTGCCTG	ATCCGGTTGTATGTAGAGGCCG	22	22	61.84	61.917	50	54.545	342
1034	LInD7-25	Chr07	1711723	1908902	ATAGCGGGTTGTTGGTGTCACA	CATTTCTCGCCCGCTCCATTAC	22	22	62.455	61.942	50	54.545	348
1035	LInD7-26	Chr07	1793590	1931215	AATGATCCTTCGCTTGACCGA	TCTGCAGGCTCAAAGATGATC	21	21	60.355	60.308	45.455	43.478	350
1036	LInD7-27	Chr07	1797668	1935383	TCATCGATCAAGGACTCCGACG	ACAGCTTGCGATGGAAATCTGG	22	22	61.887	61.519	54.545	50	335
1037	LInD7-28	Chr07	1844365	1978496	GAGGAAGGGAGAGAAGAGGGGA	ATTGACTTGGACACCGAGACGT	22	22	62.047	61.917	59.091	50	339
1038	LInD7-29	Chr07	1941024	2072369	CGTTGGGTGCTCTTCTTGTTCG	GTCAGACGTGACGACTTGCAAA	22	22	62.243	61.612	54.545	50	304
1039	LInD7-30	Chr07	1971401	2100898	TATGCAACCACAGGAAGAGCCA	CCCCGTTCAAAAGGATCCCTCA	22	22	61.951	62.278	50	54.545	314
1040	LInD7-31	Chr07	2042009	2172931	GGCTGTCTCTGGTCGATCTCTC	AGCAGCGATACGAATGGATGGA	22	22	61.896	61.92	59.091	50	346
1041	LInD7-32	Chr07	2042493	2173446	CCCTACGGTCACAGCTGACTAA	AATTAGTGGCAGTGGCAGCTTG	22	22	61.464	61.72	54.545	50	304
1042	LInD7-33	Chr07	2399972	2851922	CCTTCCACCTCCTTACCACTCC	CCGTAAGTAGCATCCTCCTCCC	22	22	61.746	61.662	59.091	59.091	301
1043	LInD7-34	Chr07	2451855	2945554	TCAATCAAGCGGTCAAACAC	CGGAGGAAGTAGTAGCGAAC	20	20	61.318	61.82	45.455	54.545	323
1044	LInD7-35	Chr07	2476696	2985145	TCCCGCTAGATCTGGTGGAG	TCTCTCTCTCTGCGCTTTCGAG	20	22	60.468	61.821	60	54.545	341
1045	LInD7-36	Chr07	2488379	2996928	ATATCCGGCATTGCAATGGGTG	TCGGACTCCTGATGCTCATGAT	22	22	61.663	61.019	50	50	328
1046	LInD7-37	Chr07	2502299	3012644	GTGAAGCACGGGTATTTTGCTAGT	ATGGTTCGTCGCTTCCGTACTT	24	22	61.629	62.287	45.833	50	326
1047	LInD7-38	Chr07	2505716	3017179	CCGGATCTAGCGCCAAATTGAT	TGGAAGACCATCATGCTACAGCT	22	23	61.13	61.707	50	47.826	334
1048	LInD7-39	Chr07	2568488	3078501	TTGAACCTGGTTGCACCACAAG	TGAACACAAAAGGATGCGCTGA	22	22	61.787	61.327	50	45.455	349
1049	LInD7-40	Chr07	2767971	3276965	AGAGAAGTACTCCATCCGTTTCACA	ACGGTAACTACGTCGAGCGG	25	20	61.504	61.971	44	60	339
1050	LInD7-41	Chr07	3438321	3946952	AGCATGTGAGGCTTTAACCCAT	GCACTCACGCTGTCTCTTTGTC	22	22	60.292	61.986	45.455	54.545	325
1051	LInD7-42	Chr07	5745371	6347578	TAGCCTATGGCATCACCTCC	TCCGTAATTAGCACTTAGGC	20	20	61.798	61.918	54.545	40	342
1052	LInD7-43	Chr07	5774283	6377043	CCTGAGCGCAAGGACAAAAAGT	GGACATGCTGCACGTTCTTCAG	22	22	61.9	62.311	50	54.545	301
1053	LInD7-44	Chr07	5793430	6395138	AGGGGCAAGCCTAACTTTTCCA	CGACGTGGGTTGTGCTACAA	22	20	62.172	61.693	50	50	319
1054	LInD7-45	Chr07	5848859	6446388	AGTAGGCTTGGGATGTCTTGGA	GCAACAAACAAAAGGCTTTGGCA	22	23	60.831	61.97	50	43.478	350
1055	LInD7-46	Chr07	5947527	6553713	GCTTACAAGTTCAAGGACCGCC	CGGCGGGGTATGATCTAGTACC	22	22	62.013	61.777	54.545	59.091	304
1056	LInD7-47	Chr07	6174251	6784809	TTTGTGTGCTGCATGTTGGTCT	TTTGTGCAAGTTGGGGAATGCA	22	22	61.531	61.806	45.455	45.455	340
1057	LInD7-48	Chr07	6956103	7579361	CAACAAATATCAAGCGTACG	ACTTAACTAGCTAGGTTCAC	20	20	61.345	61.817	47.826	54.545	342
1058	LInD7-49	Chr07	7668448	8288510	CAGGGACATGGCTACTGGTTGT	AACAACGACTGGTCACATCCCT	22	22	62.271	61.875	54.545	50	345
1059	LInD7-50	Chr07	7683347	8303701	CACGATTCAATGTAACACTG	CATCACATGGTTGATAGGTG	20	20	61.979	62.052	50	45.455	344
1060	LInD7-51	Chr07	7820444	8438022	TGGGGATATGCATTCCACTGGA	AGTGTGCAAAGTAGGACCAGGG	22	22	61.238	62.204	50	54.545	301
1061	LInD7-52	Chr07	7947809	8568621	CCGGTGTTTAGATCTTGCCA	AACCCAGGCAAAGGTGAAGG	20	20	61.513	62.744	54.545	54.545	333
1062	LInD7-53	Chr07	8010745	8631873	TGCCACAAGGACTCAAGGACAT	AACACTGCAGCATCAGAAGTGC	22	22	61.888	61.959	50	50	350
1063	LInD7-54	Chr07	8117851	8787303	CACTGATCGACAACACCAACGG	TTTACAGTGGCCCCCAACTTCA	22	22	61.991	62.099	54.545	50	349
1064	LInD7-55	Chr07	8183775	8837405	TGTACACCAGACCAGGCCAATT	TCATACGGACTCGGAATCAGGC	22	22	61.894	61.907	50	54.545	327
1065	LInD7-56	Chr07	8199963	8853645	GCTGAGTACAGTTGCACATGGT	TACGGATCAGAACAGCAGTC	22	20	61.13	61.456	50	50	316
1066	LInD7-57	Chr07	8204729	8858463	ATACCTTAATACGTCCGGCCGG	CGGCGAAGAAGGGGAGTAGATC	22	22	61.976	62.22	54.545	59.091	305
1067	LInD7-58	Chr07	8225987	8868028	CCCTCCTAGCCACTTGAAGCAT	TGGAGACGGCGGCTTAGTTTAT	22	22	62.08	61.795	54.545	50	349
1068	LInD7-59	Chr07	8511000	9154481	AGTTTGACTGGCTACATGTC	CTAGTTTTGAAGACAAGCAC	20	20	61.678	61.427	50	43.478	346
1069	LInD7-60	Chr07	14005923	14705867	TCCAGAGTGTGACGAGCAGTAC	GCACTGAGCATGGCTAAGCATG	22	22	61.706	62.457	54.545	54.545	310
1070	LInD7-61	Chr07	14926648	15704043	CGGGTCACAGATCGGTCAAAAA	GGTCCATGGTCTAGGGGGAAAG	22	22	61.126	61.822	50	59.091	331
1071	LInD7-62	Chr07	15039076	15817978	GGAGAAGGAAACCTGCACTACCT	GCGTGCTCCCACCTTAAGTTTC	23	22	61.894	62.013	52.174	54.545	316
1072	LInD7-63	Chr07	15045975	15824857	TGTCTTACCGGCGACCTTTCAT	GGTGCATGCAAACTGAGGTGAA	22	22	61.989	61.909	50	50	314
1073	LInD7-64	Chr07	15200149	16027597	CTTGAGCCGGACTAGCTTTTGC	GATTCGCATCAACAGCTAGGCG	22	22	62.071	62.236	54.545	54.545	344
1074	LInD7-65	Chr07	15410503	16279008	TCTGTACCCATCACCCAAAGCA	TGTTGCGGGATATTTGAATGGTGT	22	24	61.628	61.352	50	41.667	341
1075	LInD7-66	Chr07	15460293	16409733	CTTTTCAGCCACTGGACGTAGC	CATCCACCTCCCTTGCCAACTA	22	22	61.753	62.018	54.545	54.545	339
1076	LInD7-67	Chr07	16070493	16907462	AACTTCAGACCACATGATTC	TACCATTACAAAATTCTATC	20	20	60.118	62.421	43.478	54.545	344
1077	LInD7-68	Chr07	16117392	16954959	CATACCCCTGTGTAGCGAGAGG	ATGGAGGGGGTACACCATTGTC	22	22	61.911	61.764	59.091	54.545	318
1078	LInD7-69	Chr07	16146787	16982476	GACTCCGCTGCGACGATGAT	CGTTCGTTCGTTCGTTCTCGTT	20	22	62.67	61.951	60	50	347
1079	LInD7-70	Chr07	16246348	17075348	GTCGGCTACAGGGGAAAAGA	CGGGAGAATAGAAAACACGC	20	20	61.995	62.413	54.545	54.545	311
1080	LInD7-71	Chr07	16386959	17169005	CTGCGAAGGTAGGTGCGTTTG	CCTCGTCTGATCGTCTCGTC	21	20	62.111	61.924	57.143	59.091	347
1081	LInD7-72	Chr07	16418232	17199483	TTACTACACCCACACCGCGATC	ACTCTGCATCAGTTCCCGTCAA	22	22	62.347	61.931	54.545	50	334
1082	LInD7-73	Chr07	16453708	17239058	TTGCCTAGGGAGAGCACTGAAC	GGCGTTGTCGATTGGTATGTCG	22	22	61.998	62.164	54.545	54.545	337
1083	LInD7-74	Chr07	16479058	17268495	AAGGTGACGAGGAAGAGCGG	CCAAAGAGGAAACCGCTGGGT	20	21	61.879	62.879	60	57.143	339
1084	LInD7-75	Chr07	16618876	17471836	GGCTCGTGGCTGTCTGATTTTT	CTAAAGTTTGTGCCGTGCCAGT	22	22	61.709	61.896	50	50	326
1085	LInD7-76	Chr07	16789961	17645814	ACTGAAATTGTGCAGCTGTAGCC	CCCATGCAAGTTCACTGCCTTT	23	22	61.917	61.924	47.826	50	309
1086	LInD7-77	Chr07	18577661	19129793	CCGTGGAACAAGCAGTAATCGC	CTTTTGAGTCCTTGGGCTCAGC	22	22	62.366	61.712	54.545	54.545	315
1087	LInD7-78	Chr07	18601310	19159790	AGCTAACTTGGTGGCTACGC	CGTTAGAAACCAATAGTTAC	20	20	61.666	61.882	54.545	45.455	303
1088	LInD7-79	Chr07	18779169	19334213	CTGGGGCTTTGGTCTAGGAGAG	ACGCGGAGGGAGTAGTTCTTTC	22	22	61.806	62.035	59.091	54.545	307
1089	LInD7-80	Chr07	19721221	20631046	CCCTAAATGTTTGACACCGTGGA	ACCATTGACCAGTTTGTCTCGC	23	22	61.058	61.386	47.826	50	311
1090	LInD7-81	Chr07	19769015	20677849	GTCTTCTTGGGATGCAGAGTGC	GTGAGCTCAGCTGCATGGTTTG	22	22	61.512	62.581	54.545	54.545	309
1091	LInD7-82	Chr07	19802516	20692133	CGTGGGCCTAATTTTAGTCGACG	ATTTGGGTTCGGTGGAATTGGG	23	22	61.817	61.414	52.174	50	346
1092	LInD7-83	Chr07	20130986	21025329	TCATATGGTAGGTAGTGTAC	GTACTTCACCGCCCTCCTAC	20	20	61.93	61.353	47.826	50	302
1093	LInD7-84	Chr07	22033011	22836588	TGCGACAACGTATGACACAACG	TGTGTTGGAGTAGGCCCAATGT	22	22	61.973	61.894	50	50	313
1094	LInD7-85	Chr07	22328220	23146519	CATTGTCTTACGTGGCGATG	CGTAGTCCATGACGAGGTAG	20	20	62.058	62.104	50	54.545	318
1095	LInD7-86	Chr07	22546905	23369500	TCCCTCCGTCCTAAAATAAGTGCA	TTGGGATGGTCGGATTCAGCTT	24	22	61.606	62.018	45.833	50	348
1096	LInD7-87	Chr07	22603255	23413189	CAAAAGCAGCTAGGTGACACGG	CTTGCCTCCTGACGCGAAAAAT	22	22	62.006	62.016	54.545	50	301
1097	LInD7-88	Chr07	23096331	24007603	TGAATAACGCTAAAGATAGC	TGTTTAACACACTTTGTGTG	20	20	62.291	61.573	54.545	54.545	300
1098	LInD7-89	Chr07	24175482	25218396	TTAAGCCTAATTGCTACAGG	TGGGGTGTCTAATCAAGAAG	20	20	61.941	61.957	54.545	50	306
1099	LInD7-90	Chr07	24337056	25368419	AGAGAATCACGGAGCAGGTACG	ATCGGCTATCGGCTGGAACTAC	22	22	61.836	61.973	54.545	54.545	348
1100	LInD7-91	Chr07	24337202	25368599	CCCATCTCCTCCCAAAACCCAT	CTGGTATCGGCGTCGGCTATTA	22	22	62.045	62.019	54.545	54.545	314
1101	LInD7-92	Chr07	24427795	25447372	ACGAGGGACATCTCCGTGGT	ACTCGTCGTAAAACAAACCGGT	20	22	62.783	60.738	60	45.455	320
1102	LInD7-93	Chr07	24619262	25641378	CAAAATTTGCAGAGGCGACGC	GTCCAGATGCCACGGCTACTAG	21	22	61.572	62.475	52.381	59.091	314
1103	LInD7-94	Chr07	24746495	25775270	GGTTATCGATCGTCGTCGTCGT	TCGTCGTCTACTTCCACGGC	22	20	62.469	61.916	54.545	60	324
1104	LInD7-95	Chr07	24896861	25928779	TTCTACTACTCCCTCCGTCCCA	AACACGGCAAGAGAGCTTTTCG	22	22	61.435	61.942	54.545	50	325
1105	LInD7-96	Chr07	25328139	26360137	GGACTTACGAGACTGGTTCG	ACGAGGATCTTTGCAAGGTAC	20	21	61.821	61.861	50	50	318
1106	LInD7-97	Chr07	25520885	26552642	ACATCATCTCGCGGGTGAATCT	TCGCACATGGATGGAAGAAGGA	22	22	61.859	61.744	50	50	342
1107	LInD7-98	Chr07	25579759	26611679	GGCCTCCTATGATAAGCATG	AGTAACATATTACTCATGCG	20	20	61.255	60.969	54.545	40	315
1108	LInD7-99	Chr07	25596216	26629316	GTGTGCTGCTCCACTCAAAGTC	TCCCCGTCGTCTAACATGTCAG	22	22	61.946	61.776	54.545	54.545	307
1109	LInD7-100	Chr07	25601243	26634267	CGCAGAGTACGGTTGCATTCTT	TCTCCAAAACGAATGCAGCCTT	22	22	61.498	61.075	50	45.455	302
1110	LInD7-101	Chr07	25827737	26864332	CGCTATTCTTGCTGTACGAATAGGA	TGAGATTCGAAAACTTTCAGGTCCA	25	25	60.79	60.686	44	40	346
1111	LInD7-102	Chr07	25849050	26884864	CACCCCACGATGAAGAACAAGC	GTGGAGCGGCAGGATTTGAATC	22	22	62.016	62.146	54.545	54.545	316
1112	LInD7-103	Chr07	25858747	26895497	GGGGATAAGCCAAAAACTGCGT	AAGGTGGCTACTCTAGGTGC	22	20	61.723	61.477	50	54.545	323
1113	LInD7-104	Chr07	25869669	26905807	GCGAGACGAATCTTTTGAGC	GCTGAAGCATGGCTGGGATAAA	20	22	61.247	61.273	50	50	343
1114	LInD7-105	Chr07	25898514	26935020	GATGTACTGTGTGTGTGTGGCG	GCTCGTAAGTTACATGTGGGCG	22	22	61.991	61.864	54.545	54.545	322
1115	LInD7-106	Chr07	25937346	26977839	ATCTGCATGCGTGTGTCAACTG	AGTGGGAAGACGGTTTGTGCTA	22	22	62.009	61.871	50	50	304
1116	LInD7-107	Chr07	26153035	27193549	ATCCAAAGACAAGAACAATG	AAAGCTTACTAAGGACAAAG	20	20	61.937	60.491	50	45.455	348
1117	LInD7-108	Chr07	26161321	27201865	AGAGGCTGCCATGGAGGATTTC	CGTGCAAAGCCTCCAAAGAGTT	22	22	62.41	61.9	54.545	50	332
1118	LInD8-1	Chr08	318615	310055	CTTCTGGCCTGTCAGCTTCTCT	GGCGCCCCTTATCTGATCTTCT	22	22	61.996	61.936	54.545	54.545	337
1119	LInD8-2	Chr08	414613	400573	TCACCACAAGAAGCACCATGAGA	TAGGACCTCATCAGTGGCCT	23	20	62.08	62.309	47.826	54.545	318
1120	LInD8-3	Chr08	427159	413194	ACCAATAGAGTGTGGCAGCAGT	GACCAAGCTGCTACTCCTCACT	22	22	61.945	61.731	50	54.545	300
1121	LInD8-4	Chr08	619835	605473	GATCCCAACCCCCGATGGAATA	GTAGCATTAGCCAGCCAGCAAG	22	22	61.628	61.894	54.545	54.545	332
1122	LInD8-5	Chr08	666549	652619	TGCAGCAATTAGAAGCTCCCCA	GTGGCCCGGAAAAATGGACTAG	22	22	62.282	61.521	50	54.545	350
1123	LInD8-6	Chr08	932983	894305	TCAATTGTCTAGTTTGCATG	CTAGTAGTACGAGGAGGCTC	20	20	62.001	62.059	44	54.545	350
1124	LInD8-7	Chr08	2001748	1759427	GTTTGTCACCGAAACCAAAAACATG	TGCTTCTCATGAGTTGCGCTAA	25	22	60.445	60.613	40	45.455	314
1125	LInD8-8	Chr08	2704687	2423260	TAGGGTAGTGTCGGGCTCTTCT	TGACTCATGAATCTGGCAGGGT	22	22	62.027	61.427	54.545	50	342
1126	LInD8-9	Chr08	2817341	2504746	ATCTTCGCTCCATGTGCAAA	CGGTTAGTGCAGGACAGAGAC	20	21	61.135	61.972	45.455	54.545	322
1127	LInD8-10	Chr08	2825106	2512697	TGAAACGTTTGAGGTGGTTCGG	AGGATGCAAAGCACCACTCTCA	22	22	61.572	62.208	50	50	306
1128	LInD8-11	Chr08	2863050	2547720	TATGCCGTTCCAGTCGTTTG	CTCTCGAAGCGAAGCGGAAG	20	20	62.019	61.942	50	54.545	306
1129	LInD8-12	Chr08	3212885	3464001	ACAAGTAGTAACGGGTGCTTACTTT	GGGATCCATCGAGCGGAACATA	25	22	60.454	61.983	40	54.545	320
1130	LInD8-13	Chr08	3779157	4051040	ACGTCTCGTGTGCCGTGTATAT	AGCACTAAACTCTGAGCACGCA	22	22	61.829	62.487	50	50	326
1131	LInD8-14	Chr08	3867962	4138735	ACAGTAACGATTCCTACACC	TCGTCCTCTCTCGGCAATAG	20	20	62.023	61.679	54.545	50	303
1132	LInD8-15	Chr08	4110912	4564641	CAACTTGGGCTCTGACACAACC	CCTGGGATCGAGTCTCTGGTTG	22	22	61.9	62.108	54.545	59.091	347
1133	LInD8-16	Chr08	4118525	4572296	CTGGCCTCTTCACTCATCCACT	CCACGCTATTGGACTAACACAGT	22	23	61.743	60.617	54.545	47.826	350
1134	LInD8-17	Chr08	4167979	4621858	CATCCCTGACCCTGAAAGTGA	TGCTCTGCAAAGATTCTGAAC	21	21	61.897	61.223	52.174	41.667	336
1135	LInD8-18	Chr08	4216208	4669617	ATCGCCACCATTCTAACCTCCC	AAGAACGTAGCCTGATGACCCC	22	22	62.138	62.06	54.545	54.545	342
1136	LInD8-19	Chr08	4221420	4674873	TTGCCAGCAAAAGCAAAAGCTT	AGGAGGGTAGCTATGGCGACTA	22	22	60.941	61.896	40.909	54.545	325
1137	LInD8-20	Chr08	4306447	4746337	GGAGGTGATGCATGGATGTGTG	ATCAGACCCTGACGAGCACTTG	22	22	61.584	62.301	54.545	54.545	315
1138	LInD8-21	Chr08	4536095	4980492	CTGCCGCTACCCTCTCTTCTTT	TGCAAGCGACCTGAATCTAGCT	22	22	62.054	62.053	54.545	50	331
1139	LInD8-22	Chr08	4598253	5046438	TGCCATGCTTTGATCTGTGCTG	TAATCATCGCGTGTGCCAATGC	22	22	62.033	62.441	50	50	320
1140	LInD8-23	Chr08	4636154	5084220	CGGCAAAGCATGGGGTATCAAC	GCCTAGCTAGTTACTCCCTCCG	22	22	62.408	61.395	54.545	59.091	348
1141	LInD8-24	Chr08	4889409	5302944	ACGAGATTGCCCTTGTGCATTG	TTCTCATCGGCAGCGTTGTCTA	22	22	62.03	62.033	50	50	337
1142	LInD8-25	Chr08	5004448	5446399	AATATGTTAGGATCACACGG	CCTAGGAGAGGTCACATCTG	20	20	61.102	61.945	50	59.091	339
1143	LInD8-26	Chr08	5008883	5450104	GATCTTCACATGACGTGGCA	TAGCTCAGCTCGAATCCATGG	20	21	62.124	62.493	54.545	54.545	321
1144	LInD8-27	Chr08	5130807	5553624	TGTACCGATTATTAGCTGCACATGC	AGGGCCCTGTTTTTGAGTCATT	25	22	61.758	60.426	44	45.455	325
1145	LInD8-28	Chr08	5153532	5578045	GCATCATCGATCTGCGTCCAAA	GTTCTGTTGTTTCTGCCCGAGG	22	22	61.626	61.952	50	54.545	312
1146	LInD8-29	Chr08	5690232	6486978	CATGGATTGATCTGTCGTAC	GCTGTACATTGTAATCTTGG	20	20	63.001	61.764	59.091	54.545	348
1147	LInD8-30	Chr08	6120384	6649043	GCATGAAATGGTCGTCTCTGCT	TCGCCGTGTCCATTTGCATTAC	22	22	61.255	62.072	50	50	307
1148	LInD8-31	Chr08	6153373	6694927	TGGAATGCCAAACACTCAGCAA	TCCAACGGCCTTAGAGTCTATCT	22	23	61.276	60.373	45.455	47.826	350
1149	LInD8-32	Chr08	6277942	6812207	ACGATGGAAGCAAATTGAATCGGA	TGAGATGATCAGATTGCTAACTGCA	24	25	61.4	60.396	41.667	40	332
1150	LInD8-33	Chr08	6278910	6813220	CAAAGGACCCAAGCGTCAAACA	CATAGGCTGCGTTCGAATGTCC	22	22	61.84	61.932	50	54.545	307
1151	LInD8-34	Chr08	6394449	6992875	GATGGCCTTTCCCTGCTGAATG	CCAGAAACTGTGTGGCCAGACA	22	22	61.852	62.966	54.545	54.545	320
1152	LInD8-35	Chr08	6463635	7016619	TGCTGACATCCATGGTCACCTT	AGAACAAGCGATCATTAACCCCA	22	23	61.955	60.308	50	43.478	306
1153	LInD8-36	Chr08	6532367	7076163	CCCACCCCCATCACTTTGTTCT	TGATGGGGGTAATTGGAGGCTG	22	22	62.493	62.097	54.545	54.545	324
1154	LInD8-37	Chr08	6538120	7081961	TGCAAGCGGTCCATTTATTCGT	AAAACACGCCAAAAAGCCACAC	22	22	61.196	61.502	45.455	45.455	349
1155	LInD8-38	Chr08	6560558	7103838	AATTTACGCTTTGCCAGACCTTG	TCCCTTTTTAATGGCTAGCTGCA	23	23	60.305	60.563	43.478	43.478	337
1156	LInD8-39	Chr08	6573386	7112414	TGCAACGCAATATATATCGG	ATCATCATCTCCTCCAGTGG	20	20	62.117	60.881	50	45.455	313
1157	LInD8-40	Chr08	7084224	7409132	CTAATGGTGGGGGACAGACTCG	GAAGGTCGGAATGGGGAGACAA	22	22	62.115	62.004	59.091	54.545	334
1158	LInD8-41	Chr08	7112832	7436539	GCAGATAGAAAGGGTGAGAGG	ACTGACATCTATGAGTTGAC	21	20	61.901	61.568	50	44	326
1159	LInD8-42	Chr08	7242422	7583173	CATCCACTTCCCCCACCCTA	TCCCCCTTCTCGATCCAGAT	20	20	62.153	62.109	59.091	54.545	342
1160	LInD8-43	Chr08	7297039	7637356	CCAACTCTATGAGCCGAAAGCC	TCGATGACAAGTTGAGGGACCT	22	22	61.317	61.086	54.545	50	300
1161	LInD8-44	Chr08	7358691	7700329	ACTTAGGGGCACATCGGTCATC	GGCAAGTGGAGCATTGTAGTGG	22	22	62.126	61.773	54.545	54.545	328
1162	LInD8-45	Chr08	7366930	7708607	TCGTGGTTGCAATTGTCCAACT	TGTAGGCCATTAGCAACACG	22	20	61.268	61.999	45.455	50	318
1163	LInD8-46	Chr08	7466000	7775929	CCACTGGGCGTGTCTTACTTTT	TGTTGCTTTGTTTGCAGTTGCG	22	22	61.069	61.802	50	45.455	350
1164	LInD8-47	Chr08	7491582	7801721	TCGAAGCACTGCCCATTACG	ATCACGCAAGAGATCCAGCCTC	20	22	62.04	62.433	50	54.545	318
1165	LInD8-48	Chr08	7501995	7812101	TGTGGACACATGTTGGTGAACA	GCATGGAGCTTTCAAACCAGGA	22	22	60.619	61.402	45.455	50	307
1166	LInD8-49	Chr08	7508786	7818864	TGACGTGAAAGAGAAAGAAGGGAGA	ATAGTCAACTGCAGCACGGACT	25	22	61.677	61.987	44	50	329
1167	LInD8-50	Chr08	7528309	7843816	ATCACAGGTGCTGGATTTCCCA	ACTTCATCATCGCCAACCTCCA	22	22	61.965	62.007	50	50	319
1168	LInD8-51	Chr08	7562114	7892733	TGCTTTAATATTTGTGCAAGCGGAG	TCTGTTTAGATTTTGCGCACTGGT	25	24	60.903	61.518	40	41.667	322
1169	LInD8-52	Chr08	7573318	7904229	TCCCTAAATACTTTGAGGTAG	TGTCATTTCCCTGAACTTTC	21	20	61.627	61.711	54.545	41.667	322
1170	LInD8-53	Chr08	7637075	7972330	GTGTGGCAGCTTTGACCAAGAA	CCCCACCCTATTAAGTCGTGCT	22	22	61.844	61.808	50	54.545	300
1171	LInD8-54	Chr08	7768989	8119044	ATGCCACTCAATCCGCATGTTG	TAGGTGCTGGTGCTAAGGATGC	22	22	62.095	62.387	50	54.545	302
1172	LInD8-55	Chr08	7785790	8135891	TTTTGCCCGGCCTTCTAGAGA	GATTCTCCCTACATGCGAGG	21	20	62.321	61.926	54.545	54.545	318
1173	LInD8-56	Chr08	7785825	8135894	TTTTGCCCGGCCTTCTAGAGAG	GATTCTCCCTACATGCGAGGCT	22	22	62.321	61.926	54.545	54.545	318
1174	LInD8-57	Chr08	7791847	8141904	ATACAAGGTGCTGGCTCGAGTT	CGGAAAACGTGCTTGGAGTTGA	22	22	61.998	61.883	50	50	307
1175	LInD8-58	Chr08	7823388	8171623	ACAACCGATCCATACTTGCAGC	AAATGCTGACTGGATTGCCACG	22	22	61.258	62.03	50	50	349
1176	LInD8-59	Chr08	7893678	8244132	AAAGGTTTGCAACAGGGCCTTT	AGTGGTGTTGTTGGGTGAGGAA	22	22	61.753	62.025	45.455	50	317
1177	LInD8-60	Chr08	8121396	8389229	AAGCCTAGCAGATGGTGATC	TACAGAAACCAACCAGTTCC	20	20	62.164	62.165	54.545	50	339
1178	LInD8-61	Chr08	9138419	8895591	GCCGGGCGAATTCTGCTAATAT	TGCATTGGTTATACATGCCGGC	22	22	61.194	61.905	50	50	344
1179	LInD8-62	Chr08	10998066	10873137	TCCTCTCCATCTGACCATAC	TAACTTGTGCCGCTACTACG	20	20	62.005	62.148	50	54.545	348
1180	LInD8-63	Chr08	14398605	13756125	TCCAACTGTAGTGTTCTGTGCCA	ACTAGCAAGTTCAAGCTGTTCATCA	23	25	62.012	60.974	47.826	40	344
1181	LInD8-64	Chr08	14645319	14002970	TGCGTGGGTTGAAAATACAGCA	AATTTCAACAATGGTGCCCG	22	20	61.331	62.252	45.455	50	313
1182	LInD8-65	Chr08	14786678	14113361	ACGGCGAATCGATACTCCCTAA	ACTCAAATACGTGGTGGTGGGT	22	22	61.072	61.881	50	50	324
1183	LInD8-66	Chr08	15266748	14360043	TAGCGATTAAGTTTGCTTCC	CAGAAAGCAGAAGTGAGAAG	20	20	61.783	61.7	45.833	50	346
1184	LInD8-67	Chr08	15631768	14647613	TTAGTCCGCAACATGGTCAGGT	ACATTCCCCTTTCAAACGCCTG	22	22	61.937	61.66	50	50	326
1185	LInD8-68	Chr08	15646221	14662132	AACCTCTACTCGTTCACCAC	GGACCCACGCTATCAACCCA	20	20	61.969	61.871	54.545	54.545	339
1186	LInD8-69	Chr08	16139642	14857315	TGGGATGATGATGAGAGGGAG	ACGGCAACCCGTACGTCGTC	21	20	60.091	61.002	54.545	50	317
1187	LInD8-70	Chr08	16151016	14869276	TGGTCCATTCCTCATTCGCCTT	CATGACACACCCTGGGATCACT	22	22	62.018	62.012	50	54.545	308
1188	LInD8-71	Chr08	16327709	15032955	TCCATTTGCCCATCCCATTTGC	GGTCTAACCGTCGATCTACCGG	22	22	62.073	61.946	50	59.091	302
1189	LInD8-72	Chr08	16474809	15108815	AAGCTTTCGACCCAAAACCCAA	CCACAGAAGAGCGACTTGATGG	22	22	61.215	61.248	45.455	54.545	338
1190	LInD8-73	Chr08	16649372	15288654	GGGCAATTTCGCTGAACAGGAA	ATCTTCCGGGCTTCAGTGTCAA	22	22	61.971	61.941	50	50	349
1191	LInD8-74	Chr08	16858154	15580438	GCTGGGCCACTTCTCTCCATAT	ACTGATCAATTCTCGCGGCAGA	22	22	61.883	62.361	54.545	50	300
1192	LInD8-75	Chr08	16955141	15750424	TTGCTTGCAACGTTTGACCACT	TACTGCCGCCCACGATATAACC	22	22	62.032	62.233	45.455	54.545	306
1193	LInD8-76	Chr08	16982479	15776957	AACCCTTTTGTTCAGCGCCAAA	AGCACAGTAATCCTGGCCAACA	22	22	62.054	62.215	45.455	50	300
1194	LInD8-77	Chr08	17065469	15863033	AGTTGGGTCTGGAGTGGAGTTG	CCTGAAACGGAGGGAGTAGTGG	22	22	61.879	62.049	54.545	59.091	303
1195	LInD8-78	Chr08	17079585	15877190	ACTCTGTGGGCTGGCTACTG	GGTGGCCCATTTGTTACGTG	20	20	61.452	62.032	50	50	313
1196	LInD8-79	Chr08	17176432	15966946	GGGAATAGTTTGCTGTGCCGAG	TTGCTTTCGTGCCAGTTCTAGC	22	22	61.826	61.696	54.545	50	313
1197	LInD8-80	Chr08	17576657	16320537	AGAAGTTCCAGGAGCCCATC	CCTTTTTGTGGTTCCCGTTGGT	20	22	62.013	61.794	54.545	50	304
1198	LInD8-81	Chr08	17585276	16330038	ACGCACGGACCTAGCAAATA	TCTGCAAGTGTGGCTCCTTT	20	20	61.786	61.589	50	50	338
1199	LInD8-82	Chr08	17599897	16357789	TGCTTTTTGAAAAGGGCAAAGGC	CGAGGGTCGCCTTTTATGTTCAC	23	23	61.489	62.011	43.478	52.174	336
1200	LInD8-83	Chr08	17605499	16363419	ACGGTTTGGATCAGGAAGAGGG	GCCCTGTAGCGAGTGAGATAGG	22	22	62.009	61.967	54.545	59.091	334
1201	LInD8-84	Chr08	17607016	16365027	AGTGGTGCTATGCTCATTCCGT	CTATTGCAGTGCCAGGTGAAGC	22	22	62.064	62.085	50	54.545	350
1202	LInD8-85	Chr08	17742243	16505275	ACGGGACCAAACCTTATAGTGCA	CTTGGGCATGTGCTGATGGAAG	23	22	61.895	62.099	47.826	54.545	314
1203	LInD8-86	Chr08	17958848	16719466	GACGTAGCGGCAATGGTGATTC	TAGCGGCACTAATTAGGGAGCC	22	22	62.179	61.928	54.545	54.545	348
1204	LInD8-87	Chr08	17985222	16731874	AAGTGGGCCAACATGAGGAG	ATGACTGGGATGTCCTCATC	20	20	62.127	62.216	59.091	54.545	311
1205	LInD8-88	Chr08	18029088	16782058	CACTCCTCCGGTTATTCCCCTC	GGTTGGCAAATGCAAGTCCCAA	22	22	61.866	62.446	59.091	50	302
1206	LInD8-89	Chr08	18035747	16788573	GAGTGGGTGGCATTAGGGTCTT	TAACCATGCAGCAACGAACAGG	22	22	62.019	61.704	54.545	50	346
1207	LInD8-90	Chr08	18064939	16817841	CAATGCCGGTTCGTTAATCGCT	GTCGCGGAGTTGGAGAGTTACT	22	22	62.126	62.025	50	54.545	331
1208	LInD8-91	Chr08	18084354	16837052	ACTCACTATTGCCGGGCATCTT	GTAGGCAGAGACACCAGTAGGC	22	22	62.075	62.105	50	59.091	348
1209	LInD8-92	Chr08	18099404	16862404	TTGGTAAGGTGCACTGGTGTCA	TGGAGTGGTGGCAATAGCTTTT	22	22	62.076	60.491	50	45.455	300
1210	LInD8-93	Chr08	18102752	16865754	GTCCATACCTTGCAATCGTACGT	GTCCAAGACGCAAAGCAGGC	23	20	60.982	62.464	47.826	60	324
1211	LInD8-94	Chr08	18131185	16897284	GAGAAGTGAACAGGAGAGCGGA	ACGACAGCCCTAAACTATGCGT	22	22	61.718	62.045	54.545	50	312
1212	LInD8-95	Chr08	18169490	16936777	TCGTGCATGGGATGAGCTGATA	TAGGCTGATGCATGTTTGACGC	22	22	61.605	61.825	50	50	347
1213	LInD8-96	Chr08	18179374	16946612	CTGATCGTCTCCTTCGTGTGGT	ACTCATCAACAACACGAGCGAC	22	22	62.028	61.427	54.545	50	347
1214	LInD8-97	Chr08	18210617	16979309	ACGGATCAAGTGATGCCTGGAT	GACCGTTTTGCTCTCGTTGGTT	22	22	61.815	61.884	50	50	306
1215	LInD8-98	Chr08	18215482	16984230	ATGCTGCGCCAGAATTTGTG	AGGACGGAGGGAGTAAGTGA	20	20	61.786	61.964	45.455	54.545	327
1216	LInD8-99	Chr08	18328680	17083540	TTCCACGACACCACCCATTCTT	CGCGTAAGAAATGAGCTAGCCC	22	22	62.144	61.68	50	54.545	302
1217	LInD8-100	Chr08	18396870	17141499	ACCCCCTAGTCAGCAACTCCTA	CCCGTCACTAAGATGTTAGGAAAGA	22	25	61.985	60.105	54.545	44	305
1218	LInD8-101	Chr08	18462121	17206784	AGGTTGTGCGGTTGGGCCAG	TAAGGGTGAAGACGGAGGAG	20	20	63.001	62.054	54.545	54.545	302
1219	LInD8-102	Chr08	19149984	17912169	CCTGCTTGATTGCCTCATTT	TGGCATGCTCAGCTCCTTATGT	20	22	61.894	62.078	45.833	50	334
1220	LInD8-103	Chr08	19223211	18002573	AGGCGCCTCCAGAAATTTCTCT	TGGGTGATGGATCTGCTCATG	22	21	62.013	62.145	50	54.545	312
1221	LInD8-104	Chr08	19326875	18115611	CCATGCATTTTCTTTGAGCAGATGA	TGTCAACTGCAAGGCTGTAGAGA	25	23	60.624	61.819	40	47.826	348
1222	LInD8-105	Chr08	19383452	18181311	GTGCGTGTATATCTTTTGGTCCCA	GCATGATGCGCTACCATGTACT	24	22	61.159	61.125	45.833	50	309
1223	LInD8-106	Chr08	19494813	18270521	CGAACTACAACTTTCCGTTTCCGT	TGAACCAACAGGAAGAACCAAAGG	24	24	61.782	61.413	45.833	45.833	300
1224	LInD8-107	Chr08	19506187	18293909	TATGATTTAGGCCCTGTTTG	ATCCAAACGAACTTCCACAG	20	20	60.424	60.093	45.455	45.455	336
1225	LInD8-108	Chr08	19776945	18557060	TGACACGCCCATCTGTTCTGAT	TAACTTCCGCTCACGCAAAACC	22	22	61.997	61.944	50	50	307
1226	LInD8-109	Chr08	19777772	18557931	TCTCTGGCGAGGCAAGGAATTT	CCCCCAAACAGTCCAGCTTTTG	22	22	62.271	62.179	50	54.545	346
1227	LInD8-110	Chr08	19852486	18631817	ACGTTGACTGGTTTCGGTCT	CATCACACGCAAGATGCCGA	20	20	61.852	62.134	50	50	344
1228	LInD8-111	Chr08	19897218	18676907	AAGGTTCATTCAAGCCTCCAGC	CGACTTTTTCCCACCAGCCAAA	22	22	61.144	61.85	50	50	333
1229	LInD8-112	Chr08	19916027	18695166	TAGGCCCTGCTTTGATTCAGG	TCAGGCGTCCATTGTTAGAT	21	20	61.699	61.7	50	47.826	323
1230	LInD8-113	Chr08	19994667	18775678	ATCACCTTCCTCCTCACCAACG	AATTGGGCATGTAGGTCGACGA	22	22	61.998	62.055	54.545	50	311
1231	LInD8-114	Chr08	20078696	18863311	ACTGAACACGGAAAACCCTTAGAC	TCCTGCCGGGATTTAGTCAACT	24	22	60.981	61.422	45.833	50	335
1232	LInD8-115	Chr08	20169050	18961976	AGGGAGTACTTATTTGAATCAC	TACCCACTAAGTTTTGTTTAC	22	21	61.632	62.284	40	52.174	300
1233	LInD8-116	Chr08	21168517	20296560	TGTCTTAGAAGTATGGTGAC	ATACCTTGCATTAACTGTTG	20	20	60.506	62.139	47.826	50	300
1234	LInD8-117	Chr08	22198669	21192335	CCAATCAAGATGAGGCAGCTGC	ACTCATTGATGCATACCCCGCA	22	22	62.154	62.398	54.545	50	331
1235	LInD8-118	Chr08	22759020	21736750	GGATGCCCCCTCAAATAGTTATGA	GGGATGTCTTTTCGTTGCTTGC	24	22	60.203	60.922	45.833	50	348
1236	LInD8-119	Chr08	23978312	23016322	CCATTGTTCCATTTATCGAG	TGGACCCTCACACTCGTTAG	20	20	62.599	62.14	60	48	311
1237	LInD8-120	Chr08	24070342	23099622	TGAACTGTTAAGATGCACGGCG	TAGTGTTTCTTCTCTGGCGGCA	22	22	61.748	61.927	50	50	310
1238	LInD8-121	Chr08	24073621	23102857	GATCAGAGGATGCTGGAGCCTC	AACTTGGAGGACCACTTTGGCT	22	22	62.245	62.098	59.091	50	325
1239	LInD8-122	Chr08	24109401	23145653	ACGAATCATGCACATTGCCACA	GAATAGGCCGTGAACTCCACCT	22	22	61.716	62.06	45.455	54.545	337
1240	LInD8-123	Chr08	24136631	23171941	TTTGGGAATGGACTGGCTGACT	TGGGCTCCATCGATCAAAGGAA	22	22	61.898	61.753	50	50	344
1241	LInD8-124	Chr08	24239472	23274687	CACAAGGAGTGCACAGCATCTG	ACACATACCTCGTCGGAGATGC	22	22	62.013	62.154	54.545	54.545	304
1242	LInD8-125	Chr08	24488889	23572390	GGCTTGATTTCCTATCCAGCACA	GCCTGGGCCGAGTAAGAAAGAA	23	22	60.937	62.576	47.826	54.545	342
1243	LInD8-126	Chr08	24624978	23639980	GAAGCAGAGATGGCCATGCATC	TCAGTACCAGCCCATCCACATG	22	22	61.963	62.074	54.545	54.545	311
1244	LInD8-127	Chr08	24636119	23651222	TCACCATGGTCAAGTGCCTGAT	ATTCGGATCCGGTGCAGTTACA	22	22	61.955	62.055	50	50	326
1245	LInD8-128	Chr08	25201510	24233857	CCCAAGTTGGAGGGATGCAG	TCAAAGTTGTCAGCAGTGAG	20	20	62.474	62.085	54.545	50	312
1246	LInD8-129	Chr08	25441278	24460034	GATTTTTACTCGTCACGCCCGG	CACATCCTTGCATCGCATCTCC	22	22	62.112	61.949	54.545	54.545	343
1247	LInD8-130	Chr08	26191238	25106366	AGTTGGACGGAACTACGGAAGG	ACACCTGTAAACTGCGAGACGA	22	22	61.98	61.903	54.545	50	343
1248	LInD8-131	Chr08	26278477	25193644	TGAAGAGAGGTTTGTGCCAC	TGCGCATGTGTTGTACTATG	20	20	61.602	61.758	59.091	54.545	300
1249	LInD8-132	Chr08	26982218	25881838	GAAGTCGCTGGAGGAGATGTCC	CGCCGACGACAACGACAAAATA	22	22	62.416	62.033	59.091	50	330
1250	LInD9-1	Chr09	83032	159934	CTTTTGTTGTTCAGCTCCTG	AGCCAAAATTCACACACCTC	20	20	61.622	62.177	50	59.091	335
1251	LInD9-2	Chr09	546548	219274	ATGAGCTGCAGTTAGGAGTC	TTCCTATTCGGTCCACGTGA	20	20	62.108	61.143	54.545	50	300
1252	LInD9-3	Chr09	593554	272743	GGGTCCCTCCAAATCTTGAC	CGGAATTTTTGGTGGGGAGT	20	20	61.962	61.982	54.545	54.545	332
1253	LInD9-4	Chr09	599679	278972	AGAAGAAGAAACCGCACTCCCA	TGTTTCCGCATACTGGTGGACT	22	22	61.875	61.937	50	50	319
1254	LInD9-5	Chr09	696487	388992	TGGCAGGCGCGCAATTAAATAA	TTCTGGGAAGACAGATGGCTGG	22	22	62.093	62.012	45.455	54.545	313
1255	LInD9-6	Chr09	721570	415714	TAGTGGATACTACCTCCGTC	ACTAAGCTGTGAGATGAATC	20	20	61.886	61.931	50	50	347
1256	LInD9-7	Chr09	913151	619457	GAGAGAGAGGGTGATGACGTGG	ACGATGATTGTTGGAGCAATGCA	22	23	61.84	61.677	59.091	43.478	344
1257	LInD9-8	Chr09	915239	621637	CCACAGCTGGCATCACAGTTTT	GCAGCGATCTCTCACCGTAGAT	22	22	61.913	61.957	50	54.545	330
1258	LInD9-9	Chr09	1141446	874919	TAAATGTAGCGATCGCAAGCGG	CGATTCCCATGAGCTAGAGTGC	22	22	61.676	60.866	50	54.545	345
1259	LInD9-10	Chr09	1185139	938947	GGATGCAATAAAAACCGGGGCT	GGCATGACCTCCCCTCTCTTTT	22	22	61.798	62.024	50	54.545	333
1260	LInD9-11	Chr09	1359694	1135531	GTTAGGGTTAGATGGCTCGGCT	AGAGCTAACAAGTTGTGCTGGAA	22	23	61.866	60.434	54.545	43.478	301
1261	LInD9-12	Chr09	1684942	1564142	GCTGTTTTGGGCCTTCTATGGG	ATCTTCCCGAGCATGTGGTTGT	22	22	61.792	62.271	54.545	50	318
1262	LInD9-13	Chr09	1684946	1564180	GCTGTTTTGGGCCTTCTATGGG	ATCTTCCCGAGCATGTGGTTGT	22	22	61.792	62.271	54.545	50	318
1263	LInD9-14	Chr09	1868495	1807823	TCTCGCTCCAACCGTACCAA	GCAGCCAACTCTACCGTTCA	20	20	61.989	62.003	50	54.545	308
1264	LInD9-15	Chr09	1928669	1857537	AAAAAGGGGAGAGGGGAAGGAG	GCTGAGCCTTCTGTTGACGAAC	22	22	61.375	61.996	54.545	54.545	338
1265	LInD9-16	Chr09	1982689	1916789	GGGGCAAACAAGATTAGCAGCA	TCGCCGTTCTGATCGATCTGTT	22	22	61.726	62.088	50	50	328
1266	LInD9-17	Chr09	2168973	1960592	TTCGTAACACGTTTTCCTAC	GCCATCATCCCGAACCATTG	20	20	61.432	62.041	50	50	339
1267	LInD9-18	Chr09	2174920	1969304	CTAATCGTGGAGGTTGTTGGCG	ATCTTCTCCCCTGGACCTCCTT	22	22	61.813	62.005	54.545	54.545	326
1268	LInD9-19	Chr09	2211352	1998373	TCAGACACAGCGGTAACCAC	GCACCTAGCCTAACAAAACC	20	20	61.861	60.021	50	41.667	347
1269	LInD9-20	Chr09	2281978	2078112	GGCCTTGCCCTCAGCTATAGTT	ACGCCGGATTCATCTGTTCTCT	22	22	62.143	61.793	54.545	50	311
1270	LInD9-21	Chr09	2312926	2198727	ACAACATTGCCATGTGGTCACA	GCCGAAAGCAATCTATGAGACACC	22	24	61.276	62.027	45.455	50	332
1271	LInD9-22	Chr09	2432178	2328201	TAAGCTGATAGGGAAAGGCGGG	CCTGAGTGGGTGTGCCTATGAA	22	22	61.875	62.007	54.545	54.545	310
1272	LInD9-23	Chr09	2465184	2357773	TGGAAATATGGTTGCACGAGGA	AAAATAGTGGGGATTGTGCATGC	22	23	60.027	60.119	45.455	43.478	322
1273	LInD9-24	Chr09	2801109	2988727	AGATCGAAGTGTGGTACTGTTGGA	GCTAAATTCCCGTACGTGTTGCT	24	23	61.533	61.715	45.833	47.826	336
1274	LInD9-25	Chr09	2825216	3008616	AAACTAGTTATGTTACCATG	TATAGGACATGTCTAACAAC	20	20	60.498	61.149	50	50	346
1275	LInD9-26	Chr09	2943231	3094444	ACCGAGTTCCTCATGACATGAACA	AATTTTGGAGGCTTTGAGGGCT	24	22	62.076	60.761	45.833	45.455	325
1276	LInD9-27	Chr09	3061057	3268832	CAGCGCTAGATCCCTATACCCG	CAGGACCCACCACATACCATGT	22	22	61.836	62.018	59.091	54.545	341
1277	LInD9-28	Chr09	3227438	3472634	TGTCACGTCAACCGGCTAGAT	TGACCTTAACCTTGTCCAAA	21	20	61.979	60.868	50	41.667	341
1278	LInD9-29	Chr09	3329694	3636334	TCACTTATATGTGGGCCCCAGC	GTCCCCTAACCGCAATACCAGA	22	22	62.148	61.805	54.545	54.545	338
1279	LInD9-30	Chr09	3395441	3711473	ATCTCGCTCCCCACTTTCATCC	TGGCTGAGTTATCATGATGGTCCT	22	24	62.131	61.432	54.545	45.833	322
1280	LInD9-31	Chr09	3443520	3791196	AAAGGTGGTTTTCTGGGTGGGA	GAATTGCTGCGAGACGTGAACA	22	22	62.047	61.991	50	50	346
1281	LInD9-32	Chr09	3476920	3824679	ATGGAGCAGCAACATGGACATG	AAATGCTGACTGGATTGCCACG	22	22	61.529	62.03	50	50	329
1282	LInD9-33	Chr09	3541552	3888826	CACCCATAATGAGTTGATTC	ATCATTTATACACACTCTAG	20	20	62.043	61.666	50	54.545	318
1283	LInD9-34	Chr09	3634371	3990357	GAGTGCACTCTCTCCGTGAAAA	ACTGTGGTCGTCCAACACTA	22	20	60.546	62.172	50	54.545	321
1284	LInD9-35	Chr09	3768510	4063038	CTCGCCATGTCGATTCGAGA	TGAATGTCCCCAACGTGATC	20	20	61.663	62.878	54.545	54.545	330
1285	LInD9-36	Chr09	3801760	4097810	TATTGCTTCCCCATGGACGGTT	CTTCTCTAGGCCAGCCAACAGT	22	22	62.025	62.002	50	54.545	315
1286	LInD9-37	Chr09	3935918	4280492	TCACTGCCCCCTTTACATTGGT	CTCGTTGTGGGGAGATTGGACA	22	22	61.904	62.254	50	54.545	346
1287	LInD9-38	Chr09	4121843	4848848	ACGTTCGTTCGCGTTTCGTAAT	GCCCAACGTACATTGCTGAACG	22	22	61.722	62.861	45.455	54.545	312
1288	LInD9-39	Chr09	4280304	5006689	ATGCAGCAAACAGAGCCATG	GTATGGCTATTACCCATATC	20	20	61.717	62.31	50	59.091	308
1289	LInD9-40	Chr09	4342362	5068951	GGACGTGACACTAACAAGAGCC	ACGGAGGACAGAAAACGTACGT	22	22	61.18	61.9	54.545	50	335
1290	LInD9-41	Chr09	5139951	5885362	GATGCATGATATGCAGTGTG	CTGAAATCAGGCCCCATCTC	20	20	61.916	62.109	54.545	54.545	348
1291	LInD9-42	Chr09	5145317	5890662	TGGCTATACTCGTGGCACTGTT	CGGCTGATTGCGTTCTTTCCTT	22	22	61.732	62.016	50	50	339
1292	LInD9-43	Chr09	5214607	5960940	GCATATAGTGGGGTCTAGCC	CGCTGGTCTCCAACACAACA	20	20	62.049	62.006	59.091	54.545	325
1293	LInD9-44	Chr09	5249119	6017632	AGTGGATGTTGTTGGAGCCCAT	GGCTTGACTTATTGGGCCCAAG	22	22	62.232	61.792	50	54.545	328
1294	LInD9-45	Chr09	5339345	6490387	CTCGGGTAGCAAGGATGAGG	ATTCAACCCAACGCTGCAGA	20	20	61.915	62.03	59.091	50	335
1295	LInD9-46	Chr09	5388018	6571862	TCAAACATTTTGAAACGGACGGAG	CCGACCGACGAAAGATGGTT	24	20	60.497	61.801	41.667	54.545	350
1296	LInD9-47	Chr09	5434698	6613759	ACCTAAAATCTCTCTCAGCGCGT	GGACCATCTGGAACTGCCGTAT	23	22	61.987	62.126	47.826	54.545	347
1297	LInD9-48	Chr09	5496541	6762832	GGGTGCAACTCAGAGTCCACAT	TTCTGGTGATGGCAAAGGCAAG	22	22	62.52	61.663	54.545	50	305
1298	LInD9-49	Chr09	5691099	6899156	TTTTGGAATGTTGGGTCCAC	GTCGGGCTGACTGCACACAC	20	20	61.815	62.855	54.545	54.545	322
1299	LInD9-50	Chr09	5700348	6921551	GCCGAATGAATGCATGCCAAAG	TCCCATCTTCTTGTTCCTGGGC	22	22	61.62	62.283	50	54.545	329
1300	LInD9-51	Chr09	5713174	6934437	GGTGCATGACTCCGTTGATTGG	GGTTAGCATCGGCCTCCTAAGA	22	22	62.081	61.604	54.545	54.545	349
1301	LInD9-52	Chr09	5739933	6953855	AGACGGACCGTACAACAGTA	TTCTTCCTTCCTCCGGCAAA	20	20	61.07	62.144	50	50	336
1302	LInD9-53	Chr09	5905568	7099751	GACCGTTGCTTGTGATGGATCG	TAGACGACTGCTCTCCCGAAAC	22	22	62.119	61.768	54.545	54.545	340
1303	LInD9-54	Chr09	6132922	7330763	CACCGCATCCTCAACCTGTAGA	GCCTCCCTTGATGCAATCCTTG	22	22	62.048	61.852	54.545	54.545	331
1304	LInD9-55	Chr09	6139684	7338374	GGTCACCCTTCAAAGATGTCATGG	CCGCTATCGAAGGTGAAACGAC	24	22	61.642	61.605	50	54.545	348
1305	LInD9-56	Chr09	6158415	7357197	AGCCAGTGGACTTGTCACAGAT	TCGTGTTGAAGCTGTGTCTTGC	22	22	61.618	61.877	50	50	314
1306	LInD9-57	Chr09	6354126	7530624	ACAGAGGGAGTAGTTGTTACCGA	TTGTAAGGCAAACCAGACGTGC	23	22	60.499	61.892	47.826	50	315
1307	LInD9-58	Chr09	6367243	7543806	GAGCATGCCTGAGAACGGAG	TAGTGTCGATCGTCCTCCTC	20	20	62.058	61.645	50	45.455	321
1308	LInD9-59	Chr09	6470207	7642513	AGAAACGGAGGGGGTACAAGAT	CCCAGCGGCAGAGAAAAGAAAA	22	22	60.83	61.651	50	50	332
1309	LInD9-60	Chr09	6579079	7727307	ACCACCATTGATGACCTGCCAG	CTCACCAGCGAGGACGAGTTTC	22	22	62.862	63.136	54.545	59.091	306
1310	LInD9-61	Chr09	6784714	8193131	TGCACCACCGATCCATGTATGT	TCAGGTTGTGACATCTGTGCCA	22	22	62.069	62.136	50	50	313
1311	LInD9-62	Chr09	6890317	8319256	TTCTTGTTGCTGGACACAAGCC	CGTACGTGCAACCTGAATCGTA	22	22	61.844	60.981	50	50	333
1312	LInD9-63	Chr09	6946606	8374726	GCATGCAAGAACCGTCGTAACA	TAATTTGGGCCTGGCTCTCTCC	22	22	61.997	62.086	50	54.545	337
1313	LInD9-64	Chr09	6985313	8412397	TTTTCCCTACTGCGACACCT	GGGGATGAGTGGATTTGGGG	20	20	61.871	61.845	50	54.545	300
1314	LInD9-65	Chr09	7063019	8495732	CACAATCCAATGGGGGTGCAAT	AGCATCTCTCTCTGTGTCTTGCA	22	23	61.747	61.63	50	47.826	337
1315	LInD9-66	Chr09	7084897	8541894	TTTCATATGGCTAACATTTC	AAATGTGAGAATAAATGTGC	20	20	60.682	61.892	43.478	50	300
1316	LInD9-67	Chr09	7166766	8622238	TTGGTTGCTCTGATGGAGGAGG	GGGAAGAGATGACTTGGGTGCT	22	22	62.012	62.013	54.545	54.545	332
1317	LInD9-68	Chr09	7209174	8967438	CCACCGCCATGTCATCGTAT	GTGCGCGTTACACCAGGTAA	20	20	60.547	62.361	50	54.545	350
1318	LInD9-69	Chr09	7378822	9384336	TTTTGCCCAGGGATCAAACTGC	GGTCGTATGTGCGATCCGAGTA	22	22	61.93	61.945	50	54.545	306
1319	LInD9-70	Chr09	7398517	9402308	TGCATTCCTCCCTGTTTTCCTAGT	GGCGTGCATAAAAGCTCTAGC	24	21	61.804	61.57	45.833	50	350
1320	LInD9-71	Chr09	8201984	10300386	GTAGGACTCCCTCCGTTTCACA	GAACAACTTTGGATGCTCGGCA	22	22	61.405	61.961	54.545	50	312
1321	LInD9-72	Chr09	8239696	10351604	TTAGCTGCGGAAACTCGTCGTA	GTTCCCGACTACCATCACCACA	22	22	62.015	61.989	50	54.545	341
1322	LInD9-73	Chr09	8486931	10648471	CGGCAGTCGATCGATTCCAC	AGTACTTTGGATAATAAAGTAAGTC	20	25	62.367	62.124	54.545	54.545	347
1323	LInD9-74	Chr09	8889085	11028822	GTTGTTGGAGTTATATGGGC	TAATCTGATAAGTCGTGTTG	20	20	60.628	61.141	45.833	47.826	300
1324	LInD9-75	Chr09	9722272	11750720	CATAGACTGCCCTCACAGACCC	ACACCCAATCAGAAGAGGGACG	22	22	62.12	61.998	59.091	54.545	312
1325	LInD9-76	Chr09	9724418	11752739	TCGCCCATAATAGTTCGAGGGG	AAAGCGCTAGGAGGACAGCTAC	22	22	61.666	62.105	54.545	54.545	325
1326	LInD9-77	Chr09	9727932	11756137	AGGAGCTAGCAAGGGAGAAAGC	ACACCTGCATCTACAAGTGCCA	22	22	62.069	62.203	54.545	50	308
1327	LInD9-78	Chr09	9854290	11975249	GTCAATGAATGGGTACATTG	AGGTTTGTTCTTTTCTTCTAG	20	21	62.158	61.164	54.545	47.826	302
1328	LInD9-79	Chr09	9974627	12025127	ATTTCCTTCGGACTGAAACCCC	CACAAAAGAGATGAGCACAAAAGGA	22	25	60.555	60.221	50	40	321
1329	LInD9-80	Chr09	9990393	12045988	ACAGTACACCAACGGATCGGAG	AACTACACCCTTCCCACCATCG	22	22	62.034	62.004	54.545	54.545	310
1330	LInD9-81	Chr09	10125721	12191723	CCCAACCAGGATTAAAGATG	ATAGAAACATCATTGACATG	20	20	61.273	61.95	50	45.455	350
1331	LInD9-82	Chr09	12385148	14207397	ATGTCACATGCATGCCTGTG	CTTTGAAGTGTTGGTCTCAC	20	20	62.044	61.829	50	54.545	339
1332	LInD9-83	Chr09	14120540	15877017	GGCATGAAGCCTAGTGGTTG	TGGGGTTTAGACCACTTCAC	20	20	61.933	62.192	50	50	310
1333	LInD9-84	Chr09	14722254	16486834	TGAGAGAGACAGCCCTGTTC	AGTGAAACGATGGGTTTGTC	20	20	61.978	62.174	54.545	45.455	316
1334	LInD9-85	Chr09	15112793	16846670	GCACGCTGTTTTGCAACAAAGT	TGATGCCAGCACAATGGATGAC	22	22	61.803	61.526	45.455	50	326
1335	LInD9-86	Chr09	15299024	17030907	TTTGAGATTCGTGCAAACGG	ACTTTCTTGTTGTGTAATGAGGC	20	23	61.957	61.155	50	40	314
1336	LInD9-87	Chr09	15702209	17422070	CGGGATTTCCATTTTGCAGGCT	TCAACACAAACGAGCTGCTTGG	22	22	62.052	62.14	50	50	329
1337	LInD9-88	Chr09	15710729	17439394	ACTTCCCTCCCAACCCTCAT	ATCACCAGATGCACTACTCC	20	20	61.314	61.552	50	54.545	306
1338	LInD9-89	Chr09	16138035	17884238	TCGCGGTTTACTGACGGATTCT	GAGATCGCCTGGGACTGTTTCT	22	22	62.03	62.054	50	54.545	342
1339	LInD9-90	Chr09	16164466	17909127	CAGTTCGTTCTACGGCAGAAGC	AGTAAATTTTTCGAGCACCGGC	22	22	61.795	60.095	54.545	45.455	341
1340	LInD9-91	Chr09	16167310	17915153	GGGTCCCTGACTGCACATGTAT	CAGTCGACGTGCTTGCATTGAT	22	22	62.075	62.059	54.545	50	350
1341	LInD9-92	Chr09	16205094	17952904	ACATTCTTTCGTTCAGATAC	CATAATATAGTGCTCAAGTG	20	20	62.085	61.956	54.545	54.545	318
1342	LInD9-93	Chr09	16243827	18000575	AGATGTTTACAGCCCGAGACCA	CTGCTGGCGAGACATGTGTG	22	20	61.415	61.633	50	60	301
1343	LInD9-94	Chr09	16257558	18014295	CGGCAAAGTGACCACGACAATA	CGAACAGGTATAGCGCCGGA	22	20	61.438	62.067	50	60	323
1344	LInD9-95	Chr09	16477536	18226506	GAGCTAGAGCCTAGGGTTGCAA	GCTCCTGTGGACAGTACTCTGG	22	22	61.803	62.043	54.545	59.091	348
1345	LInD9-96	Chr09	16529002	18278465	CCACCCTCCACCATTCACTTCT	AGCCTTACTGCAGATGTGTAAAGT	22	24	61.956	60.263	54.545	41.667	315
1346	LInD9-97	Chr09	16565508	18306510	AAACAACCCGAAACCGAAAC	AGTGGCTCCAAAATCACATC	20	20	62.394	61.201	50	50	309
1347	LInD9-98	Chr09	16634181	18363282	GAGAGAGAGGGTGATGACGTGG	TGGACCCAGCCCACTAATCAAG	22	22	61.84	62.018	59.091	54.545	304
1348	LInD9-99	Chr09	16660440	18396336	GCAGCCTTGATACAGATGGTGC	GGTTGCTACGAACTTCCCGAAC	22	22	61.894	61.746	54.545	54.545	305
1349	LInD9-100	Chr09	16755717	18528411	CGTTGAGTTCCACTATCCCCCT	GCCTTGCAAGGGAATGTTTTGC	22	22	61.482	61.699	54.545	50	345
1350	LInD9-101	Chr09	16757759	18530479	ACCATGCCTAGGTATCAGCTCG	GGTGAGCGTAGATGGATCCTCC	22	22	61.664	61.978	54.545	59.091	309
1351	LInD9-102	Chr09	16776021	18548816	TGCGTACCACTGTTCTCAAACT	AGGTCCATATTTGGCTGCCGTA	22	22	60.159	61.817	45.455	50	336
1352	LInD9-103	Chr09	16798507	18568246	CCTTTACGAGTACGGAGGGAGT	CCGTGCTAAATTTGACCATGCCT	22	23	60.943	61.985	54.545	47.826	339
1353	LInD9-104	Chr09	16812870	18583048	CTGTGGTGGTGGAATCAGCC	GCGTCACGTTTCGTTTCGTTTC	20	22	62.007	61.688	54.545	50	304
1354	LInD9-105	Chr09	16868351	18674155	CATCGCTCGTCAGTGGCTTTTT	TCCTCCAAACACATCCATACTCCA	22	24	62.006	61.312	50	45.833	343
1355	LInD9-106	Chr09	16884001	18689754	ATTGCTGGGCATGTTCAAAGGT	AGGGCAGCAGAGAAATTGAG	22	20	61.353	61.96	45.455	50	349
1356	LInD9-107	Chr09	16886830	18692594	GTGGCTGCTTTTTAGCGTCCTT	TCACGTTGCTTTGTGGTGACAT	22	22	61.962	61.262	50	45.455	323
1357	LInD9-108	Chr09	16991126	18791435	TAATACCACAAATCTCAACG	ACCGAAATAGACTCCGTGAC	20	20	61.658	62.007	54.545	54.545	319
1358	LInD9-109	Chr09	17073318	18847320	CAGATCCACCTGTAAGCCACCA	GCACTGTACAGCCTCACCTACA	22	22	62.007	61.983	54.545	54.545	305
1359	LInD9-110	Chr09	17147769	18922252	TTAGGGCCAAAAAGGTGTTGCA	CTCCAGCTACTTCCCTATGGCC	22	22	61.22	61.936	45.455	59.091	301
1360	LInD9-111	Chr09	17211356	18988784	GTGAATCGGAACCTTTCGGTGC	TGTGTGTGTGGCTTGAATTGGG	22	22	62.315	61.853	54.545	50	312
1361	LInD9-112	Chr09	17275826	19054133	GCTGGTGAACGACTTGGACTTG	CGCGAACGCTCAGAAAGATTGT	22	22	61.942	62.045	54.545	50	300
1362	LInD9-113	Chr09	17295653	19074602	GGGAGTTACTGGTACCCCTC	GTTGTCTTATCAGCTGCAGC	20	20	61.218	61.195	59.091	50	325
1363	LInD9-114	Chr09	17393146	19159112	TCACCCGCTTCTTCACGATCTT	CATGTACTCCCACAGTCTCGCA	22	22	61.983	62.038	50	54.545	349
1364	LInD9-115	Chr09	17434913	19212022	GGATGGCCCAGGGGATTATCAT	TCGTCAGTAAACCGCGAGATGA	22	22	61.712	61.763	54.545	50	340
1365	LInD9-116	Chr09	17450158	19227270	ATCTGCTTGCTGAAAACCAGGT	TCGGGGCAGAAATTTGCATCAT	22	22	60.754	61.213	45.455	45.455	350
1366	LInD9-117	Chr09	17460679	19237693	TGGAGCTAGCAAACTAGGCAGG	CAATGTGTCGTTCTGCCTGCTT	22	22	62.064	61.955	54.545	50	331
1367	LInD9-118	Chr09	17461252	19238330	TCTTTCTCACGGGCCATAACGT	GATTTGTAATCCGCGGATGCCC	22	22	61.989	62.267	50	54.545	312
1368	LInD9-119	Chr09	17469810	19247264	AATATATGACACTGCACAACGACCT	ACATTTATTGATTGCTCCCAGCGA	25	24	60.627	61.168	40	41.667	300
1369	LInD9-120	Chr09	17473341	19250755	AGAGGTGGAGAGGAGAGTGACT	GCACTGTGCCACTGTGTACTCT	22	22	61.372	62.745	54.545	54.545	348
1370	LInD9-121	Chr09	17548258	19318614	AGTGCCCATGCTTAATTTGGCT	GGTACGTTTTGTGCGGAAACTT	22	22	61.155	60.223	45.455	45.455	302
1371	LInD9-122	Chr09	17553304	19323584	GTTCTCCATCACCAGGGGCTAC	ATCGGGGCAAGAGGAATTCACA	22	22	62.388	62.018	59.091	50	323
1372	LInD9-123	Chr09	17739930	19518346	ATCAGACGAACCATTAGTAC	GGCAAAGATATGCTTCACTC	20	20	61.911	61.962	45.833	54.545	331
1373	LInD9-124	Chr09	17825194	19603698	GAGGCGACATGTACCAGCTA	GGGATGTGATGGTGTGGAGC	20	20	62.475	61.811	59.091	54.545	336
1374	LInD9-125	Chr09	17841313	19633169	TTCACCATTGCTTCATTGCCGG	ATCAAGACGGTTGAAACGAC	22	20	62.293	60.801	50	45.455	338
1375	LInD9-126	Chr09	18044288	19718664	CTGCCCTTTTGCTTCAGGTT	TTGCTGAGCATGCTTCACCAA	20	21	61.858	61.968	50	50	335
1376	LInD9-127	Chr09	18109674	19783482	AAGAGAACGGTGCCAGCAAATG	ACGGGGGAGAAAGCGTATGAAA	22	22	61.965	62	50	50	320
1377	LInD9-128	Chr09	18259513	20140075	GTTGTTGGTCATGTGGGAGCAG	CGGCGTGAAACATTTCGAAACG	22	22	61.965	61.76	54.545	50	340
1378	LInD9-129	Chr09	18297794	20178535	CCCTTACAGACACACCCACACA	ACCACAGTCAGAAACTTTCCAGC	22	23	62.132	61.244	54.545	47.826	339
1379	LInD9-130	Chr09	18339610	20221461	TCTGGATTCGAAACCTCACCCC	GTCTCCCTCCTCCGTCCAAATG	22	22	62.004	62.375	54.545	59.091	339
1380	LInD9-131	Chr09	18492465	20362231	TTCTCTTTATCAATTGCTGCGGC	CCATCGTTGCTGCTGTTGGTT	23	21	60.181	62.017	43.478	52.381	324
1381	LInD9-132	Chr09	18493173	20362976	GAATGCAGCCATGGTCCATCG	TCCTAAGGCCGAGTTTAGTT	21	20	62.011	61.073	57.143	47.826	301
1382	LInD9-133	Chr09	18497831	20367669	CTACATGCCGGGATCCTATCGG	TACTATTCACACCCCACGTCGG	22	22	62.104	61.782	59.091	54.545	305
1383	LInD9-134	Chr09	18540222	20409990	TGGCATGGACGTGCAAGATCTA	CATGACCAGTGAGAGCTGAGCT	22	22	62.058	62.051	50	54.545	307
1384	LInD9-135	Chr09	18786785	20656292	CTGCCCGAATGCCAACAACATT	GGTCCACATGTCAACCACCTCA	22	22	62.551	62.461	50	54.545	330
1385	LInD9-136	Chr09	18794120	20672141	GCATGTTGGACTCAAGACGAGC	AGGTGGCACTAGAAACCTCCAG	22	22	62.06	61.682	54.545	54.545	329
1386	LInD9-137	Chr09	18837184	20715245	TCCTCTCTTCCTTCTCAGGGGC	TCTCTCTTCTCACTGCGCCG	22	20	62.897	61.928	59.091	60	350
1387	LInD9-138	Chr09	18855024	20733103	AATGTAGCACCTGAGCTGCTGA	ACCGCTAAATGCCTTAACTCGC	22	22	62.001	61.568	50	50	329
1388	LInD9-139	Chr09	18940462	20818678	TGCATCATATTTGTTTCCAG	TCATCACTGCAATCTCGATG	20	20	61.787	61.983	54.545	50	346
1389	LInD9-140	Chr09	19066802	20869492	GGCTGGCTTGAGCTATTCTCCA	TATATGGGCCGATGACGCACAT	22	22	62.392	61.992	54.545	50	320
1390	LInD9-141	Chr09	19388647	21528480	ACTACCTCAAGAGGAAGATC	TGTTCGTCCTGAACCCGTTC	20	20	61.936	61.976	54.545	54.545	329
1391	LInD9-142	Chr09	19947549	22049195	CCGAAGGTAGTGGTGATTAAACCA	GTTTCCGGAGCCAAATTTCGGT	24	22	60.564	61.968	45.833	50	312
1392	LInD9-143	Chr09	20102147	22198752	TTGCCTAGCAGTTGCATCGT	CGTGAATATTACAGTCGCCGC	20	21	62.015	61.978	50	54.545	323
1393	LInD9-144	Chr09	20108751	22205328	TTGCTCTTGCCGTTGAACATCC	GCACCTGTTAGGACTTGTTGCC	22	22	61.961	61.962	50	54.545	300
1394	LInD9-145	Chr09	20120966	22217633	AAGGACTTAAGGTTCCTCAG	GTGTCGTCGTCATCATCGTC	20	20	62.608	61.787	54.545	54.545	350
1395	LInD10-1	Chr10	300945	82985	GATTTGTGAGGTGGATTTGG	CCACCCAAGCGCTAATCATC	20	20	61.496	61.89	47.826	54.545	343
1396	LInD10-2	Chr10	1109059	903775	ATATATACCATCAACTAGAG	AGACTTACCTTCATAGCTAG	20	20	62.034	60.618	54.545	44	323
1397	LInD10-3	Chr10	1547171	1410245	CCCATGTGCAGGCTAGCTAAAC	ACAGAACAGATTCGGTGGACGT	22	22	61.581	61.917	54.545	50	325
1398	LInD10-4	Chr10	1659352	1529107	TTCCCCACTGCAGTCTAAGGTG	GCTCAACCAAGAACCAACCACC	22	22	61.941	62.164	54.545	54.545	300
1399	LInD10-5	Chr10	1682517	1571090	GACTCTAACTCCCCTCAGCGTG	CCATCTTTGCCACAATCCGGTC	22	22	62.094	62.092	59.091	54.545	346
1400	LInD10-6	Chr10	2006233	1746871	CACGAATGCAAGGCTCAGAG	TACACGGTAAACTTCTTAAC	20	20	62.064	60.28	54.545	40	312
1401	LInD10-7	Chr10	2111776	1823195	TGCCACCCGTACATCTTGCAT	CGTCTCGTCATACTGGCCTC	21	20	62.065	62.197	50	59.091	345
1402	LInD10-8	Chr10	2370066	2179003	AGAGTTGGATTTCCCGTGATGGA	AGTTGAAGTCCTATTGGGGATGAGA	23	25	61.648	61.056	47.826	44	336
1403	LInD10-9	Chr10	2429742	2238509	GAAAGCTGCCAGATGTAAGCGG	CGGCCTTCAATTAGCCTTCTGG	22	22	62.135	61.581	54.545	54.545	341
1404	LInD10-10	Chr10	2436603	2245405	GGGAGAGAGTAACTGAGTGGCA	TGGGCTGCAAATCAACGTTGTT	22	22	61.148	62.108	54.545	45.455	315
1405	LInD10-11	Chr10	2444845	2253599	AAGACATTTCGGCTTGAGAG	TGCAACTATCTCATTCGCTG	20	20	62.002	62.091	50	50	300
1406	LInD10-12	Chr10	2664046	2440914	TGGACGGATAGCTACAATAAACACA	ACAACCCATTTATATCCACGCCA	25	23	60.105	60.372	40	43.478	344
1407	LInD10-13	Chr10	3498244	3208894	TCTCCCTCTTGTGTCATCAG	GCACCTGAGCATAAACGCATC	20	21	61.739	61.825	54.545	50	348
1408	LInD10-14	Chr10	3526709	3230087	GCGTAGAGGTCATGTGTACCGT	GCGAAAAACGAGGGAGGTGAAG	22	22	62.085	62.003	54.545	54.545	311
1409	LInD10-15	Chr10	3527247	3230516	GGGAAAGAGTAGATCGTAGCAGGT	GATCTCGAAGCCCTTCCCATGG	24	22	61.469	62.766	50	59.091	342
1410	LInD10-16	Chr10	3692999	3352985	GCTCAAGGCCGACATCATTAGC	AGCAACGGTCTCAGGTCAATGA	22	22	61.946	61.931	54.545	50	323
1411	LInD10-17	Chr10	3826062	3442268	GGGAGTCCAAACCGAGTGATCT	GCCATCGCCACCATCAATTCAT	22	22	61.737	61.913	54.545	50	337
1412	LInD10-18	Chr10	4035537	3668021	ACTCCCTCCGCTTCGAAATG	AGTGCTAGATCCCCCATGCAT	20	21	62.255	61.571	50	50	318
1413	LInD10-19	Chr10	4046201	3687518	ATCGTACGCTACAATGGGCTGG	TAGAAAGCACTGGAGCGTGACT	22	22	62.739	61.661	54.545	50	314
1414	LInD10-20	Chr10	4187856	3828907	AAGGATGATCAGACACGTTG	AGGGACGATAGCTCCATCAG	20	20	61.658	61.575	47.826	47.826	327
1415	LInD10-21	Chr10	4945499	4721003	TCCAATCATTACCCCTCACATCATT	CGTTGTGTTGAGGCCATGTCAG	25	22	60.104	62.258	40	54.545	334
1416	LInD10-22	Chr10	5038003	6254997	TTGACCTATTGCAATGCACG	TGTCTATATGTCCGGTCTACA	20	21	61.778	60.684	50	45.833	304
1417	LInD10-23	Chr10	5085611	4836192	TTTTCTACTTATTAGCTGAC	AAGCAGCACCAAATCATTCA	20	20	62.137	61.93	54.545	50	300
1418	LInD10-24	Chr10	5356998	5066225	AGGTTGTGAGGGGAGCGTTTTA	GCCACCAAGTCGTAGTAGCAGA	22	22	61.881	62.034	50	54.545	331
1419	LInD10-25	Chr10	5377985	5087194	TTCACAAGCACACGTTCTTCCA	ACTGGAAATGTAAGGGCTTGCA	22	22	60.937	60.491	45.455	45.455	339
1420	LInD10-26	Chr10	5876107	5423665	AGTAGAGGTGGATGTTGACGGC	GACTCCGTTTGCTCCGGTTTTC	22	22	62.049	62.251	54.545	54.545	331
1421	LInD10-27	Chr10	5888695	5436280	AGGTTCTGCATTCGACTCACCA	TGGAAGAAACAAAACGCCCAGG	22	22	61.931	61.85	50	50	304
1422	LInD10-28	Chr10	5897960	5445495	ATGAGCGCAGATGCATTACAGC	CCCCATCCCCTTGTTACGACTT	22	22	61.949	62.015	50	54.545	341
1423	LInD10-29	Chr10	5912219	5459800	CAACGGCGAATCATCGGATG	TGCTGATGGATTGGATTGAC	20	20	61.825	61.888	50	50	303
1424	LInD10-30	Chr10	6237547	5848633	TCTCTAACCTAGACACCACGCA	CGTGTAGTGCATGATCTTGCCC	22	22	60.554	61.881	50	54.545	331
1425	LInD10-31	Chr10	6665303	6727432	TACCAACAAGTCACTACTAC	AGACGATCAGTCCAACTATAG	20	21	61.826	62.099	54.545	54.545	337
1426	LInD10-32	Chr10	7008667	7409393	GACTGCATTACTTGGCACGTGT	TGATGTTGGCTAGGGGAAGTGG	22	22	61.696	62.018	50	54.545	300
1427	LInD10-33	Chr10	7028959	7435479	GACGGTGATGGGAGAGGGTAGA	TACGAAAACCATTCTGCCGTGC	22	22	62.673	62.008	59.091	50	323
1428	LInD10-34	Chr10	7043168	7449797	TGCGAGAGACAACGTCGGAT	GCCATCCTTATGCACAGTGTCC	20	22	62.127	61.581	54.545	54.545	303
1429	LInD10-35	Chr10	7053897	7471133	ACTGCGGGCTCCAAATCATC	ATGAGCCGCCGTCTAGCATA	20	20	61.811	61.987	50	50	336
1430	LInD10-36	Chr10	7073876	7485020	TGGATGTATTTGTCGCGAGG	CGGACCGCACGGGATATTCTA	20	21	61.794	62.034	50	54.545	329
1431	LInD10-37	Chr10	7076676	7487774	TTGAGCACAGAACCTCCAGCAA	TGAGGTGTTGAGGTGGTCAAGG	22	22	62.398	62.137	50	54.545	343
1432	LInD10-38	Chr10	7083764	7494899	GGCCTCTTGCACATCTTGTCAC	CCTCCTAACAAATTAAGTGCTTCCG	22	25	62.02	60.164	54.545	44	330
1433	LInD10-39	Chr10	7435411	8070809	TCAAACAGTATCAATCAATG	ACACACATTAACACTCCGTG	20	20	62.218	62.058	50	54.545	307
1434	LInD10-40	Chr10	7440136	8075498	AATGGGTTTTCGCTTCCGCATT	ACACTCAGTCACACTCACACCT	22	22	61.982	61.214	45.455	50	302
1435	LInD10-41	Chr10	7501814	8110592	GGTTTTGCCTCCATCTGAGATCG	TAAAACCGGCACCTATGATGCG	23	22	61.541	61.318	52.174	50	306
1436	LInD10-42	Chr10	7523763	8083093	AGCTCATTGCCGTTCGAATTTCA	GATATTTACCCGGTGCAACGCA	23	22	61.666	61.572	43.478	50	350
1437	LInD10-43	Chr10	8132825	8689890	CCGACTCAAAACACGGAAGACG	TTCTGCACGGCTTTTGTTTCGT	22	22	61.978	62.083	54.545	45.455	339
1438	LInD10-44	Chr10	9034499	9224987	GCAACCCAACACCCAATCACTC	CTGGAGTGGGAGCATCAGACTT	22	22	62.229	61.743	54.545	54.545	336
1439	LInD10-45	Chr10	9360883	9563253	TGGTGGAGGTGGTGATACTTC	ACTCCGTTGTCTGGACATTG	21	20	62.045	62.087	54.545	50	338
1440	LInD10-46	Chr10	9546627	9819231	GCAAAGTTTACCCTCTAGCGGC	CACAACATCTACGGTGTGGTGC	22	22	61.823	62.001	54.545	54.545	324
1441	LInD10-47	Chr10	9713186	10125583	GACTGTGGAGTCCATCGCTTG	ACTGTCGATGTGTCAGTTGAGTGA	21	24	61.004	61.995	57.143	45.833	317
1442	LInD10-48	Chr10	9787522	10203452	TCTGTAGTTTTGTGATACAACGCCT	ACCAACAAAACATGCCTGTGGT	25	22	60.741	61.48	40	45.455	302
1443	LInD10-49	Chr10	10023149	10550071	AGGAAGTTTGCGGTCGGCAG	GTGGAGCCGGATTGTGGTAC	20	20	62.023	62.071	50	54.545	327
1444	LInD10-50	Chr10	10064176	10580104	TGACTAGCTCACCTTTGTCGGT	TGGATGGATGTGTGAATGGGGT	22	22	61.341	61.708	50	50	318
1445	LInD10-51	Chr10	10292314	10822143	CGAGAGCTCTCCTTCACATGCT	TCCAACGCCATAGATCGAATCCA	22	23	62.102	61.815	54.545	47.826	300
1446	LInD10-52	Chr10	10482409	10987510	ATGCGAACAAAGATGGTGAGCC	AGCTACTCCCTCCGTTTTACAA	22	22	61.773	62.033	50	44	350
1447	LInD10-53	Chr10	10922592	11215609	ATCATGTTCAACTCCAAATC	ATGCCTGATTCCTTCATCAG	20	20	62.014	60.87	54.545	45.455	312
1448	LInD10-54	Chr10	11042551	11336228	ACCTATTAGCCGATGGATACCGA	GGTAGCTTCAGCATCCCAAAGC	23	22	60.563	61.839	47.826	54.545	341
1449	LInD10-55	Chr10	11425824	11726373	GAGTAGCCTAATCTCTCGGC	TTGCACCGCAACTTCCATTT	20	20	62.018	62.108	59.091	45.455	312
1450	LInD10-56	Chr10	11488849	11790384	TCACAACACTCCACCACTCACT	TAGTGGCCACAGTGATTCAGGG	22	22	61.481	62.007	50	54.545	305
1451	LInD10-57	Chr10	11550357	11843558	ATCCGCCACAGGAAGCTAGATC	CGGCAACTTGCGAGCAGATAAG	22	22	61.926	62.422	54.545	54.545	300
1452	LInD10-58	Chr10	11690204	11979889	CAGTCATTAGAGACCAACTG	TCGTTTGCTAGCCATTGGATG	20	21	62.251	62.066	54.545	50	324
1453	LInD10-59	Chr10	11989717	12230424	CTTGTTTTTGTGCACGCGCTTT	GACGCGGTTTTGCACTTTTTCC	22	22	62.103	61.914	45.455	50	341
1454	LInD10-60	Chr10	12134437	12407554	CACAACGAAGCTCACCAGAAGG	GTGAACTGCGAAGTGTGGACAC	22	22	61.691	62.179	54.545	54.545	350
1455	LInD10-61	Chr10	12344132	12629599	GTTGCTAGTTGTAGCTAGTG	ATTACCACATATTCTGTATG	20	20	61.731	62.108	50	59.091	321
1456	LInD10-62	Chr10	13427662	13644128	GGTGGGTCCGTCTTAGGCATAA	TGGGTAACGTTTGTTGTGTGGG	22	22	61.805	61.522	54.545	50	302
1457	LInD10-63	Chr10	13648023	13867006	AAATTTCGCTGTCACGGCTCTC	GGAGCGAGAGTAGAAGACGACG	22	22	61.753	62.17	50	59.091	321
1458	LInD10-64	Chr10	13686358	13894070	CCCGAAACTGAAACCGACACAG	CTCCCTACAAACGCTCCAAAGC	22	22	61.938	61.762	54.545	54.545	324
1459	LInD10-65	Chr10	13693012	13901014	GCTGTGCAAATGGGATCCTACG	GCAACATCAGGTCAACCGGATC	22	22	61.89	61.826	54.545	54.545	308
1460	LInD10-66	Chr10	13708323	13916302	GCAGCCCCTATGGACATGATCT	TTTCTCCCCCAACTGCTTGACT	22	22	61.949	61.831	54.545	50	336
1461	LInD10-67	Chr10	14062074	14268248	TGGACTTGTGCAAACCCGAGTA	AGCCGATTCGACTCTAAACA	22	20	62.128	61.875	50	45.833	331
1462	LInD10-68	Chr10	14335551	14550684	AGGAAGCTTGGAACATCCCTGT	TGATTTGTGGTGAGTTTGGGGG	22	22	61.635	61.019	50	50	343
1463	LInD10-69	Chr10	14337947	14553062	GTGCAACCACCCCACTTATGTC	CAAACACCACCTTAAACGGGGC	22	22	61.714	62.477	54.545	54.545	306
1464	LInD10-70	Chr10	14414682	14629716	ACCTAACCAAGCGAACGAGAGG	CCTCCTCCTCCTCTTCCTCCAT	22	22	62.292	62.12	54.545	59.091	350
1465	LInD10-71	Chr10	14512896	14727981	GCGAGAGGAGAGTGAGAGAGGA	CTGGCTAGGGATTCGACCTCAG	22	22	62.381	61.915	59.091	59.091	300
1466	LInD10-72	Chr10	15090097	15220352	ATCCAATCAGCACTCTTATC	TTGCTGTTGTCCGAGGTTTC	20	20	61.465	61.252	45.455	54.545	309
1467	LInD10-73	Chr10	15129208	15288399	GAGGCGAGAAAGAGGGGGTAGA	CTTATTCTGTGACAAGCGGCCC	22	22	62.936	61.826	59.091	54.545	338
1468	LInD10-74	Chr10	15159504	15318483	TGGGTGTGTTTAGTTCACGTCA	CGCTGCACCGTGTACTACTACT	22	22	60.094	62.074	45.455	54.545	311
1469	LInD10-75	Chr10	15243063	15387955	CTGGCAGCTTCATCCACTTGTG	TAGAAAAGGCTTGGCGTGCATG	22	22	62.024	62.026	54.545	50	336
1470	LInD10-76	Chr10	16228189	16207366	CTTCGGGTGTCTACGCATAGCT	CCGTTGGACAAGACTCCGTACT	22	22	62.154	61.969	54.545	54.545	347
1471	LInD10-77	Chr10	16288792	16275320	TAGCTTGCGTGTACTGCTAG	GATGGGCACGTGCTTGCTTG	20	20	62.116	62.51	54.545	50	333
1472	LInD10-78	Chr10	16446897	16415117	GGGGATGAATTGAGTTTTCTCTGCA	TCGTAGTAGTGAAAAACGCACCT	25	23	61.557	60.244	44	43.478	301
1473	LInD10-79	Chr10	16460135	16428419	GATCAGCGCAGTGGTCAGTT	GTTGGTGTACATGGTGCGTA	20	20	61.593	61.124	57.143	50	321
1474	LInD10-80	Chr10	16505293	16470621	AAAACCCGTCAAAGGCTGGTTC	GCAAGTCCACTACGCTACCCTT	22	22	61.851	62.304	50	54.545	349
1475	LInD10-81	Chr10	16613018	16578092	GAGGAGTTTGATCCCCTTGCCA	GGTTCGAAGTCTCACCCCTTCT	22	22	62.283	61.671	54.545	54.545	344
1476	LInD10-82	Chr10	16617414	16582519	GGCACGGCGAAAATCGAAAAGG	TGTCCCTAAGACCAAGCATCCA	22	22	63.417	61.097	54.545	50	302
1477	LInD10-83	Chr10	17317402	17301649	ACACAAGTACATACTCCCTCCGT	CGCTTGTTTACGAGGAATGA	23	20	60.817	61.41	47.826	47.826	343
1478	LInD10-84	Chr10	17428711	17410399	CTCCGTGGCATCTTCGTTGC	GCATTTGATACCATGGTGCCCC	20	22	61.971	62.179	60	54.545	313
1479	LInD10-85	Chr10	17459165	17440698	TCAAACGCGGCCTTCGACTATA	TGGTCAGCATCAAGGCTTTGTT	22	22	62.09	61.016	50	45.455	327
1480	LInD10-86	Chr10	17474425	17455929	GACCTGCGGCATCAACAGTAAA	AGTGTGTATGACAGGTGGGATCA	22	23	61.448	61.077	50	47.826	336
1481	LInD10-87	Chr10	18081664	17983134	CTGTGGTGTTCACTGTTCAG	ACCACCACCACCACCACCAG	20	20	61.913	62.056	54.545	50	339
1482	LInD10-88	Chr10	18139644	18053835	TTGGGATAGGTTGAGGTGCTGG	AGATCGAAACCGATGCATCCCA	22	22	62.018	62.125	54.545	50	335
1483	LInD10-89	Chr10	18167481	18065245	TCTGTCTGTGTGTGTGATGA	ACTCCTTCCGTTTCTTTGCA	20	20	61.797	60.422	47.826	45.455	347
1484	LInD10-90	Chr10	18182682	18079282	ACCACGCTATTGTTGTAGCAA	TCCTCACATCCCAGTGTTGC	21	20	61.28	62.147	41.667	50	339
1485	LInD10-91	Chr10	18286477	18158835	GCTCCTGTGTGAAAATCCAGGC	CCGTGTAAGCTGCAACTTTGGT	22	22	62.031	61.896	54.545	50	335
1486	LInD10-92	Chr10	18347294	18219437	AGGGTGTAAATTGAGGGGTGCT	GCCAGCCCCACCTAATTGATCA	22	22	61.641	62.676	50	54.545	310
1487	LInD10-93	Chr10	18406800	18278572	TTGTGGCGCAGATATGTGCATG	CGCCAGACTAATCTTTTGAGC	22	21	62.144	60.929	50	47.826	346
1488	LInD10-94	Chr10	18409462	18281339	AGCAACACCTACTTCCTCCGTC	TGGTTGGGGTGGAAGAGTGATC	22	22	61.984	61.952	54.545	54.545	302
1489	LInD10-95	Chr10	18436509	18308390	TGACTTGATCAGGGAGTCTAAGTGG	GTGAAGCTGGCCATGATCGATG	25	22	61.565	61.949	48	54.545	343
1490	LInD10-96	Chr10	18456031	18327922	CACAGAGAAACGTGGAGAAGTCC	TGATGATCGGATCTGGCATCGG	23	22	61.103	62.299	52.174	54.545	350
1491	LInD10-97	Chr10	18471691	18343673	CGCACTCGCAATCACAGCAG	AGCTACAGATCTATAGCCAG	20	20	61.861	62.552	50	54.545	335
1492	LInD10-98	Chr10	19233914	19102771	AGCTGAGCGTTTGTCACATTG	AGTGAGTGAATATGTGGCATGCT	21	23	61.955	60.371	50	43.478	305
1493	LInD10-99	Chr10	19482418	19377121	AGTTCACATCAAACGGGGCCTA	GTGTCGAAACATCCGATGTGA	22	21	61.947	61.404	50	47.826	336
1494	LInD10-100	Chr10	19532514	19420758	TCCAGCGGTTCCTGAACAAC	CACCACGCCCATATACCTAC	20	20	61.932	61.913	54.545	54.545	303
1495	LInD10-101	Chr10	19682450	19545194	ACGATGGCATCTCCTGGAACTG	AGGGACGAAAACAGAGCTTGGA	22	22	62.379	61.875	54.545	50	311
1496	LInD10-102	Chr10	19988992	19850604	AATCAAGGTGCACGCCGAAATT	GATATCGTTGTCGCACTCGCAC	22	22	61.971	62.205	45.455	54.545	337
1497	LInD10-103	Chr10	20004080	19869848	CCATACTGACATCTAGGCCGT	GATCCCTAGGCCTTGTTCGG	21	20	61.811	62.072	52.174	54.545	341
1498	LInD10-104	Chr10	20707939	20532763	CTCGTTTCAGGATGCGTGAC	GACGTGTATGTCGTGTGCAC	20	20	61.708	62.124	50	50	350
1499	LInD10-105	Chr10	20715166	20540061	GGGATATAAGTGGGACGGAGGG	GCGTACGCGGCCTAAATAATCG	22	22	61.415	62.333	59.091	54.545	347
1500	LInD10-106	Chr10	20790481	20630621	AATCTCCATGGACGGTCAGACC	CAATGCCCTCGTTGAACTCCAC	22	22	61.803	62.016	54.545	54.545	320
1501	LInD10-107	Chr10	20819419	20639231	TGGATTGGCGCTCTAGAAACCA	ACCTTAAAGATTGTCCAGGCATGC	22	24	62.003	61.65	50	45.833	300
1502	LInD10-108	Chr10	20842457	20662264	CCCTCCGGCCTAAATTATATGGC	TCCACAAATACTCGCTCTGTCCT	23	23	60.936	61.38	52.174	47.826	316
1503	LInD10-109	Chr10	21390222	21251802	TCTTCATGCCTTCACCATGTTGA	AATCCTCGAGCCACCAGTTGAA	23	22	60.498	61.941	43.478	50	304
1504	LInD10-110	Chr10	21553146	21414693	AATTGCCACTCATCCCTTCG	CATGTGCCGTGTTGTAGGGGTA	20	22	62.018	62.569	50	54.545	334
1505	LInD10-111	Chr10	21823115	21684671	TACCCGTGCTACTCTTCTCCCT	GTCCCAGATTCGTAGTCTCGGT	22	22	62.027	61.263	54.545	54.545	328
1506	LInD10-112	Chr10	22177235	21873555	GTGCAAATGATGTGAGTGTG	ACTGAGTCACTGGATCACTG	20	20	61.248	61.993	43.478	45.455	337
1507	LInD10-113	Chr10	22581797	22295288	GTTGGTACCTACCTCCCTTGC	TAGCAACCGAAGTCGATCGA	21	20	61.684	61.511	54.545	50	336
1508	LInD10-114	Chr10	22641864	22344329	GGAGGGAGTAGTCACTTTTCC	CGAGCTGGAAGGAGGGGATA	21	20	61.954	62.745	56.522	59.091	347
1509	LInD10-115	Chr10	22641943	22344377	GGAGGGAGTAGTCACTTTTCC	CGAGCTGGAAGGAGGGGATA	21	20	61.954	62.745	56.522	59.091	347
1510	LInD10-116	Chr10	22665209	22367770	AATGGTGTCTGCAACAACCTGC	AGCTGAAAGACTGAACCCCACT	22	22	62.168	61.56	50	50	347
1511	LInD10-117	Chr10	22866999	22569900	CGAGAGAGGTGGGTTGGGAAAA	GGTGGAAAGGTCAAAATGGGCT	22	22	62.2	61.35	54.545	50	304
1512	LInD10-118	Chr10	22955456	22663985	ACTTGGGAAAAGTGGTCAAGGAC	CAGTGCATGAAGAGTGGTGTGC	23	22	60.94	62.263	47.826	54.545	316
1513	LInD10-119	Chr10	23017325	22726529	TGTAACCTTGGGGAAGTAGATGGA	CGTGCAGCCCCTAGTTAACCTA	24	22	60.761	61.795	45.833	54.545	342
1514	LInD10-120	Chr10	23023160	22732314	TCCATAAGCTTATGGATACC	TTCGCGTATCTCGATGACTC	20	20	60.339	62.043	40	54.545	301
1515	LInD10-121	Chr10	23180627	22897651	TCAGACTACATCCGGAAGAGCG	TACTTTGTGTACCGGGTCTGGC	22	22	61.579	62.245	54.545	54.545	349
1516	LInD10-122	Chr10	23314509	23039056	TAGTGGGAGGAAAGCGTACTGC	AATACGAAAACAAGCGGCGGAG	22	22	62.045	62.062	54.545	50	305
1517	LInD10-123	Chr10	23314855	23039429	ACAAAACCGGGGATGTAGCT	TGTTAAGCTTAAGGAGTCAG	20	20	61.947	60.28	50	44	322
1518	LInD10-124	Chr10	23361197	23198444	TAGTTGCTCCCAGTGCTTCA	GCTGCTGGGCCATCATACTAGT	20	22	61.874	62.197	50	54.545	305
1519	LInD10-125	Chr10	23396459	23232664	CCTCCTCTTCTTCTTCGTGCGA	GCTCAAAAGATTCGTCTCGCGG	22	22	62.028	62.406	54.545	54.545	343
1520	LInD10-126	Chr10	23505977	23322507	GCCAAGCTGCCACATGTATTCC	ACTGACTAGGGTCTCCGTCAGA	22	22	62.413	61.688	54.545	54.545	350
1521	LInD10-127	Chr10	23514677	23331171	AGCCTGCAGGATGGATTGGATT	AGTCCACAAACCGGCCTCTATC	22	22	62.106	62.06	50	54.545	341
1522	LInD10-128	Chr10	23516932	23333468	TCGAAAGTAACATTGCTGCGGT	TGAGCAGAATGTTTGCCCTACC	22	22	61.126	60.88	45.455	50	349
1523	LInD10-129	Chr10	23533248	23345991	AGCGGATTTGGTATATGGCA	ATATACGCCTCGTGGTCCAT	20	20	60.263	61.983	41.667	54.545	303
1524	LInD10-130	Chr10	23551869	23367929	TGATGATGCAGCAAGGTAGGCT	GAGGGTGTGTTTACTTCGCGAA	22	22	62.078	61.119	50	50	335
1525	LInD10-131	Chr10	23581243	23391537	TCGAGCGGCTGGATTTACTGTT	AAATAATGCCACGCGACGCAAT	22	22	62.303	62.39	50	45.455	303
1526	LInD10-132	Chr10	23605468	23415763	TCAGTCATGCCATACCCCTGTG	TCATTCAGGTCCCTCCACTCCT	22	22	62.074	62.259	54.545	54.545	328
1527	LInD10-133	Chr10	23644623	23454265	TCGACGAGCAAGATCGAAAG	GATGATGTCAATGCTCGTAG	20	20	61.997	61.799	50	54.545	306
1528	LInD10-134	Chr10	23706049	23497626	TTCATTCTTGGCGTGTGTGCAG	TAGTGGGCACTGTGAGTCCAAC	22	22	62.205	62.188	50	54.545	334
1529	LInD11-1	Chr11	54757	139808	GCTGCTGGTACGATATTGTGCT	CCCAACATTGTAACAGAGCGAGT	22	23	61.06	61.113	50	47.826	337
1530	LInD11-2	Chr11	109595	173913	GAGAATGCAGTTATTAGATG	AATTAATTACTTGGGCTTGC	20	20	60.618	62.052	50	50	320
1531	LInD11-3	Chr11	111491	175460	ACAGCACGTGTGAATAACAGGC	TCACATGACCGTAAACCTGA	22	20	61.696	61.879	50	47.826	344
1532	LInD11-4	Chr11	201335	261796	GAGAGAGTGGAAGAGCTGCT	TCTTCCTCTCTCTCTCACCGGT	20	22	62.395	61.692	59.091	54.545	343
1533	LInD11-5	Chr11	224478	270587	CATTACCCATGCCACGTGTAGC	AAAGAGGAAATGGCCCATGCAG	22	22	61.886	61.479	54.545	50	325
1534	LInD11-6	Chr11	332350	350099	CCCCCTACTTACAAAACCGGGT	GGGCTTATGCATTAACTGGGGC	22	22	61.955	61.92	54.545	54.545	304
1535	LInD11-7	Chr11	333625	351406	CGGTGCGTCTTCTCTCACTA	GCCCGCTGCTATTCTCTCTC	20	20	62.013	62.24	54.545	54.545	347
1536	LInD11-8	Chr11	676738	694946	GTGAGGGTTGATTTTGGGGCAG	CAAATCAACATGGGTCGCACGA	22	22	61.986	62.011	54.545	50	300
1537	LInD11-9	Chr11	708061	723172	GTGACGGGCATTAACTCAGAGC	TTCGAATATAGCCCCCGTCACC	22	22	61.563	61.924	54.545	54.545	341
1538	LInD11-10	Chr11	712497	727631	CGCTTCCATACACGTTGCAGTA	TCGAGCTTTGTTTCGGTTGAA	22	21	61.241	61.233	50	43.478	350
1539	LInD11-11	Chr11	858156	877423	GCTCGCTCTTCCTCTTCAGT	ATGTTCGAGCTGGACTGGAC	20	20	62.032	62.043	54.545	54.545	318
1540	LInD11-12	Chr11	884279	903542	TGGCAGCTTCCTTGATTGCTTT	CATGTGCGTGATTAGGGCAGTC	22	22	61.346	61.881	45.455	54.545	346
1541	LInD11-13	Chr11	945908	966404	CAGATTTGTAGCCAGCTGCAGC	AATGGTTGCAAGCAGTAGCAGG	22	22	62.393	61.72	54.545	50	339
1542	LInD11-14	Chr11	1000557	1020521	GCCTAGGGTCACACGTAAGGTT	ACCTCATACCTTTCTCCTCCT	22	21	61.99	62.134	54.545	50	344
1543	LInD11-15	Chr11	1174872	1205520	GCCTGAATTCCGCTGCCTTATC	TCCCGTCGAGTTGCTTAACAGA	22	22	61.956	61.654	54.545	50	315
1544	LInD11-16	Chr11	1630431	1667813	AGATTTTGACTGTTCCACGCACA	TGGTGTTCTGCATGAGCTCC	23	20	61.241	62.274	43.478	50	315
1545	LInD11-17	Chr11	1774228	1807879	GGAAACCACACACGTGATGC	CATTCAGCAATTCGCACTCCGT	20	22	61.896	62.07	50	50	342
1546	LInD11-18	Chr11	2128390	2162070	CATCGGCTTATGCATCGACACA	CGTGCTCAGAATGTCGTAACCG	22	22	61.372	61.845	50	54.545	350
1547	LInD11-19	Chr11	2225402	2257973	CCTGCGATTAAAAGGGGCCCTA	GTGGCGGCGAGTAGTAGAAGTA	22	22	62.408	61.573	54.545	54.545	331
1548	LInD11-20	Chr11	2329554	2311051	AGAGTGATGACGTGGCCAAC	GGCTGTAATAGGCCCAATAC	20	20	62.047	61.989	59.091	54.545	339
1549	LInD11-21	Chr11	2335308	2316870	AGCATTCACCTGCAGAGCTGTA	GGCCGTACGTACTACAACTCGT	22	22	62.001	62.066	50	54.545	304
1550	LInD11-22	Chr11	2344076	2325542	CTTACAGCCTCGATCCAGTGCT	ACCATCTCCTTCTTCCACGACC	22	22	62.108	61.737	54.545	54.545	346
1551	LInD11-23	Chr11	2378872	2359917	TTGCCGCTACCTTTCCTAGTCC	TTTCGGCATCAATTTCGGTCCG	22	22	62.056	62.072	54.545	50	301
1552	LInD11-24	Chr11	2383457	2367500	AACTTATTCGCGCCTGCATCTG	ACAGTGAACGAAACATGCACGA	22	22	61.881	61.311	50	45.455	343
1553	LInD11-25	Chr11	2429026	2405767	GAGGGCATGAAGGGAGTGACAG	TCTCCCTCTTCTTCTCCTCTCG	22	22	62.639	60.093	59.091	54.545	338
1554	LInD11-26	Chr11	2458950	2450460	ACATTGCAGCAGAGAGAGCTCA	CTAACACTCCTCCCTCACTGGT	22	22	61.995	60.824	50	54.545	346
1555	LInD11-27	Chr11	2582563	2566909	TCTGAAGCTGAAGCCCTGACAA	CTCCACTATCGATGCCCCTGAC	22	22	61.878	62.235	50	59.091	317
1556	LInD11-28	Chr11	2586694	2570937	AGATTCGCAACGTGTCTCAAGC	GCACATCAAACTCGATCGGCAA	22	22	61.744	62.065	50	50	333
1557	LInD11-29	Chr11	2657817	2635264	CTAGCCGTTGGGGTAATTGCAC	GTCACGTGACAGCTTAATAGCGT	22	23	61.832	61.216	54.545	47.826	345
1558	LInD11-30	Chr11	2830420	2814753	AGCTCATTTCGAAATGCTGG	TCATGCTCTATCTCTATTTG	20	20	60.279	60.117	40	43.478	350
1559	LInD11-31	Chr11	2974943	2957615	TCCTTTGTCTATTCTCCTCTGAGCA	AGTGAGAGGGGATCATTGAGGT	25	22	61.046	60.293	44	50	326
1560	LInD11-32	Chr11	3091905	3058891	GCAGCCATAGGTTTGCCAGATG	TTGCTGTTCTTGCGCTGTTTGA	22	22	62.161	62.086	54.545	45.455	304
1561	LInD11-33	Chr11	3127540	3094513	TCAACATGGATAGAGTGCGGAGT	AACTACAAAGCCGACATGCACC	23	22	61.444	61.705	47.826	50	304
1562	LInD11-34	Chr11	3836379	3841661	TTGGTTGCTGCTGGCCTCTC	GCTACTTTCCTTGTGATATC	20	20	62.044	61.965	45.833	50	334
1563	LInD11-35	Chr11	5259837	5397346	AGTTGATCACCTACACGTAC	TAAAGTTTGTTTAAGCATGC	20	20	61.412	61.509	50	54.545	349
1564	LInD11-36	Chr11	5282132	5424317	AGCTCACACGCATATGACGATCT	ACATGTTTCTTTGTTGCGGCCA	23	22	62.102	62.108	47.826	45.455	336
1565	LInD11-37	Chr11	5403322	5537723	TGCTCTGCCATGAAATGCACAA	TGAGTCGTTAATACTGCAGA	22	20	61.662	60.022	45.455	41.667	328
1566	LInD11-38	Chr11	6796636	6745805	ATGTAGTCGCGGAAGTCGCC	TAGGCTCGTCGGCCTTGTAG	20	20	61.983	62.059	54.545	54.545	344
1567	LInD11-39	Chr11	6891961	6826715	AGCATGCCACACAGATCACTCT	TGAACCACCTAGCCAGCAATCC	22	22	62.005	62.595	50	54.545	316
1568	LInD11-40	Chr11	6916178	6851179	ACACTTCAAGCCCCCAACTCAA	TTGGGAACGAAAGGCAAGTTGG	22	22	62.358	61.85	50	50	312
1569	LInD11-41	Chr11	7041844	7356197	AACTCGACCAATGTGCCATTGT	TGTTTGGCCCGGTTAGACCC	22	20	61.075	62.415	45.455	60	331
1570	LInD11-42	Chr11	7070456	7372276	ATCCGACCTGATGGACAATGCA	TGGCCAGTTTTGTTGACAGACG	22	22	62.074	61.831	50	50	332
1571	LInD11-43	Chr11	7079592	7381441	TCTCTAGCTACTCACCAGCATGT	TTCATTGGCATCATCAACCGGC	23	22	60.626	62.102	47.826	50	318
1572	LInD11-44	Chr11	7443181	7735040	CGCCGATAGACAACTGTGGACT	TGTCAAGTGAAAGCCTTGGCTG	22	22	62.345	61.589	54.545	50	334
1573	LInD11-45	Chr11	7491453	7783277	TTGAAATATCTCGTCGGCGCAC	TACAAGCTTCGCAGGCTCTCTT	22	22	61.612	61.987	50	50	311
1574	LInD11-46	Chr11	7761250	8262696	TGCAGATGCATGTTGACCTC	TTTCTCTGCATAGATATGAG	20	20	61.833	61.473	54.545	50	307
1575	LInD11-47	Chr11	7873363	8396917	GTCTACACGCCATCCCTCTC	ACGACGAGGATGACGACGAC	20	20	62.159	61.964	59.091	60	325
1576	LInD11-48	Chr11	8345405	8834762	AGCCATAGCAACTCTACGGTG	TGCATCCGAACTATTGGTGTGC	21	22	61.211	61.513	50	50	310
1577	LInD11-49	Chr11	8535759	9174826	TGCCACAAAGTTTTGCAACACA	CTGGCAACTTGGTGGCTTGATG	22	22	60.549	62.543	40.909	54.545	350
1578	LInD11-50	Chr11	8587475	9229439	TGGGAGTACTGTGGTCAGAC	ACTCGAGGTATGCTGCTTGG	20	20	61.944	62.108	50	54.545	310
1579	LInD11-51	Chr11	8629628	9243206	AGTCAGACTCCTAATTGCAGCT	TCTATTCACCAACTTGCACAA	22	21	61.6	61.817	45.833	45.833	313
1580	LInD11-52	Chr11	8644165	9257734	TCGCGCTCTCATGGTATCAGAG	TCACGAATCAGAGCCCTCCTTC	22	22	61.956	61.793	54.545	54.545	339
1581	LInD11-53	Chr11	8715269	9310047	ATTCCTTCCCCATATGGCGGAC	ATACAACACATGCATGCAGCCC	22	22	62.216	62.106	54.545	50	339
1582	LInD11-54	Chr11	8733648	9366388	TGGCCTTCGTGTAACATTGCAA	CCGTAACCATGGCCGCAATTAA	22	22	61.331	61.836	45.455	50	304
1583	LInD11-55	Chr11	8773866	9404781	ATACCACAGGAGCTGAGGCATG	ACAGATGATTGTGGCTCTGGCA	22	22	62.135	62.274	54.545	50	316
1584	LInD11-56	Chr11	8864191	9662275	AGTTAGGATCGGCTGAAACCCC	CGGACTAGCAGGCCTATGGATC	22	22	62.072	62.043	54.545	59.091	338
1585	LInD11-57	Chr11	8913025	9708063	AGAACAGCACATTCAACACGTGT	AGGTCTGGGCTTTGTACTGGAT	23	22	61.482	61.1	43.478	50	321
1586	LInD11-58	Chr11	9381150	10221597	TTGAAGAAGCCTCTGCCGTAGT	TCAGATTGTGCTCTGCTCTGCT	22	22	61.67	61.995	50	50	335
1587	LInD11-59	Chr11	9503896	10332324	GTTAAGAGTCCCGATCGGAC	TGATGTTGATTCTCCTCCAC	20	20	61.78	62.501	54.545	54.545	339
1588	LInD11-60	Chr11	9533998	10347220	TTAGGTCCTTCACTGCTCGAGA	CAACCCTGCAACCAAAGCCATA	22	22	60.555	61.668	50	50	309
1589	LInD11-61	Chr11	9586523	10375810	GCTCAAGATTTGATGAGGCCCG	ATTCACTTGCATGGTCAGTGGC	22	22	61.894	61.72	54.545	50	338
1590	LInD11-62	Chr11	9586526	10375850	GCCCGAGTCGAGTCCATACAA	GGGTGACGAGACTATATTCACTTGC	21	25	62.352	61.244	54.545	48	336
1591	LInD11-63	Chr11	9591892	10381278	ACAATAAGAGGGCGGCAGTACA	CGCCTGTACTACTACTGCTGCA	22	22	61.741	62.088	50	54.545	335
1592	LInD11-64	Chr11	9713133	10488037	GGCGGAAGAGGAGGATAACGAA	CAAGACCCCGACACAGGATAGG	22	22	61.852	62.115	54.545	59.091	331
1593	LInD11-65	Chr11	9807823	10616887	ACGAATCGAAGGCCATAGCACT	CGTGCCGTTTGGGTGTAATCTT	22	22	62.115	61.702	50	50	334
1594	LInD11-66	Chr11	9822048	10630662	AAGTGGGAGCTAGCACTTGAGT	AAGGGACATTTCACCTGCTCCA	22	22	61.354	61.898	50	50	332
1595	LInD11-67	Chr11	9904584	10728458	AGTAGTAGAATGAGCAAAGAGGGGA	AGGGGATGAAAGAAGCATGGCT	25	22	60.815	62.038	44	50	334
1596	LInD11-68	Chr11	9916004	10739752	AGAAAACTAGAGCCCATACATGTGT	GTGGTCTCGAACACTTCTTCCA	25	22	60.046	60.224	40	50	321
1597	LInD11-69	Chr11	10245700	11154426	GAAGACACTTCTTGCAGCTGGC	TCCCTCCATTTCGAAATGTTT	22	21	62.264	61.212	54.545	40	330
1598	LInD11-70	Chr11	10302978	11202927	TGAAGGGAAAATGTTTCGCTA	AGCAATGTACTCGTCGATAG	21	20	61.039	61.839	41.667	47.826	346
1599	LInD11-71	Chr11	10417809	11325424	AACTATCATCGATCGACGTG	TCAGTCACACACCCACCATG	20	20	62.026	61.972	50	50	319
1600	LInD11-72	Chr11	10427185	11334570	TGTCCAGTTGGCTCTCCTCAAA	GGTGTAGCCGTGTAGCTAGCTT	22	22	61.556	62.1	50	54.545	303
1601	LInD11-73	Chr11	10731474	11415374	AGGCATCCAAAACTGGAGACCT	AGGTTTCTAGCTAAGCTGTGCGA	22	23	61.635	61.934	50	47.826	323
1602	LInD11-74	Chr11	11121902	12191910	AAGAAGCGCATAGGCCTTTC	TTGTTATGCTCAAGTCAAAG	20	20	62.313	61.913	54.545	50	350
1603	LInD11-75	Chr11	12477836	13039497	CGGAAACACATCACCGAACTCG	CCTGGAGGGGCTATGACAACAA	22	22	62.041	62.018	54.545	54.545	303
1604	LInD11-76	Chr11	12602230	13177974	TTGGAGGCTGTATCAGGTGCTG	TGCAGGGACTCAAATGCAAAAGT	22	23	62.324	61.506	54.545	43.478	347
1605	LInD11-77	Chr11	13001279	13339415	AGTGCATGGCGAACTGTTAACG	CACGGTGTGATATCTCTCGGGG	22	22	62.001	62.219	50	59.091	327
1606	LInD11-78	Chr11	13275728	13507680	AGGAACAATTATGGGGCACATCT	ATCCCATGCTAGTGCTCAAGCC	23	22	60.053	62.72	43.478	54.545	301
1607	LInD11-79	Chr11	13311407	13542929	ATGACCCTCATCTCAATCGGGC	TATACGAACGGGGGATGTTGGG	22	22	62.197	61.867	54.545	54.545	346
1608	LInD11-80	Chr11	13362017	13554308	TTACACTGCGAGGCAAAGTCCT	CGATTTTCAGGCCGTGACACC	22	21	62.188	62.122	50	57.143	311
1609	LInD11-81	Chr11	13582402	13736045	CCACAAACATTACCCTGAGA	GGCGTTTGGCTCCTCCATTT	20	20	61.938	62.241	50	50	314
1610	LInD11-82	Chr11	13825304	13909121	ACTTCCAGCGTAATACTCCAT	AGAGGTTGTTGGGTTGTTGCTG	21	22	62.29	61.531	50	50	300
1611	LInD11-83	Chr11	14178413	14199466	CATCGTCGCCTCAGTTTGCAC	TCACCGAGGACGACAAATCCAC	21	22	62.426	62.543	57.143	54.545	349
1612	LInD11-84	Chr11	14371870	14575705	AGCTAGGAGGCCCCCAATACTA	GCATTTTCGTGGGCAGTAGCAA	22	22	61.862	62.277	54.545	50	340
1613	LInD11-85	Chr11	14404428	14606617	AAGCTGGTGGTGATGACGAAGA	CTGGCCCTGCACAGTACCTATT	22	22	61.931	62.075	50	54.545	338
1614	LInD11-86	Chr11	14542313	14730714	GCGGCAGTACTAAATAGTCCCCT	GCTGTGAGCGGCTTTGTGTTTT	23	22	61.817	62.962	52.174	50	318
1615	LInD11-87	Chr11	14791719	14899370	TGCTATGTATGGCCAACAACAGC	TGCGAGTCGGAAGTTCCTATCA	23	22	61.737	61.203	47.826	50	344
1616	LInD11-88	Chr11	14818427	14924891	AGATTTAGTCCTGGTTGGTGT	CGGTGGCAGGCTCCATAGATTT	21	22	60.141	62.714	41.667	54.545	318
1617	LInD11-89	Chr11	14819831	14926334	ATCGCGTGTACACATCCTGAGG	AGCTACTTCCTCCATTTCACA	22	21	62.409	61.981	54.545	44	341
1618	LInD11-90	Chr11	14968253	15020390	AAAGGAGAGGGGAGAGGGTGAT	GAGGAGGTCAGCTCGGCTAAAG	22	22	62.005	62.416	54.545	59.091	341
1619	LInD11-91	Chr11	15575207	15611096	GAGATCGTGTGCTGCATATGCC	ATTTGGCCGGCATTAATCCAGC	22	22	61.999	62.179	54.545	50	349
1620	LInD11-92	Chr11	15696756	15727387	CATGAAGTACGCGCCGGAGA	TCGAGACTCGAGACCATGCTG	20	21	62.608	61.61	60	57.143	304
1621	LInD11-93	Chr11	15701963	15732543	TAGGGATCGGCTGGAGGTAGAA	CCTCAAGACCTAGGGTTAGACACA	22	24	61.838	61.057	54.545	50	340
1622	LInD11-94	Chr11	15777814	15788555	ACAGCCCTGTAATTACCAGACCC	GATCTCCAAGGTGCTGAGGAGG	23	22	61.964	62.124	52.174	59.091	349
1623	LInD11-95	Chr11	15801263	15811927	AGCAGACCGAGTTGGAGACATC	ATCGGCTATCGGCTGGAACTAC	22	22	62.043	61.973	54.545	54.545	349
1624	LInD11-96	Chr11	16016025	16015146	GCGGGCTGACAATGTCACATAG	AGTGGAGTCATCTCTGGCAAGG	22	22	61.881	61.743	54.545	54.545	316
1625	LInD11-97	Chr11	16037541	16196309	TCAATGAGACCTTTGCCACCCA	TACAAGAGCAGCATCCCCATCC	22	22	62.159	62.141	50	54.545	322
1626	LInD11-98	Chr11	16247042	16380627	GTCCTCATCAGAGATTACTC	ATACAAAGTTGTCAGATCTG	20	20	61.33	60.765	50	50	314
1627	LInD11-99	Chr11	16374784	16486050	GATCGTGTCTGTGATTGGCTGG	TTCCAAAATATCCCGCCGCAAC	22	22	61.565	62.094	54.545	50	300
1628	LInD11-100	Chr11	16440344	16563017	AGGGATGGTGATGGCATGATGT	ACAGTGAGGTTGGGCAAATTGT	22	22	61.838	60.955	50	45.455	343
1629	LInD11-101	Chr11	16591210	16723800	GAATCCAACGTGGTGGCTTGAG	GGTTTTGGTTCACGTGTGGTCA	22	22	62.016	61.772	54.545	50	346
1630	LInD11-102	Chr11	16812912	16873701	ACCGTAATCTACAAGTCCTGGCC	GGGATGAATCTCGGCGCAAATC	23	22	62.004	62.259	52.174	54.545	310
1631	LInD11-103	Chr11	16817194	16869438	CGCGTGCCGGATTATCCTAAAC	ATAGCAGCACAGAGTCCGAGTC	22	22	61.988	61.84	54.545	54.545	314
1632	LInD11-104	Chr11	16817473	16869166	GGCGGCTCAGCAAATTACAGTT	AGGGCTGCTGTCTGCTGATATT	22	22	62.027	61.819	50	50	331
1633	LInD11-105	Chr11	16990440	17163849	CACATCCACAACGTCAAGCCTC	CCAATGGTGCTCTTGGATCGTG	22	22	62.006	61.829	54.545	54.545	344
1634	LInD11-106	Chr11	17030999	17214014	CGCAACACGCAAGATTGAGAGA	CCCCCTCCTTTTCATGTTGCAA	22	22	61.743	61.35	50	50	310
1635	LInD11-107	Chr11	17034581	17217571	GGCAAAGACTTAGACCCTGTT	GCCCCTGTTTGTTTCAGCTT	21	20	61.228	62.171	45.833	52.174	349
1636	LInD11-108	Chr11	17035762	17218716	TCACGCTCGTCAAAACAAACACT	TCGCAAGAGTAAAGAAAAGTGCTCA	23	25	61.714	61.196	43.478	40	350
1637	LInD11-109	Chr11	17737254	17801679	CCGAAGTTTCCACCGAAATCACC	CGTGGCGGATTGAGAGTGTTTG	23	22	62.203	62.306	52.174	54.545	333
1638	LInD11-110	Chr11	17744000	17808379	AGCCAAGCTTCTTTTGCATCCT	TGCTCCTCGGTTGTGAGAAGTT	22	22	61.085	61.865	45.455	50	331
1639	LInD11-111	Chr11	17907390	17949696	GTGGACAGGCAACGACAATCTG	AACCGAGACTGGACCCCAAAAA	22	22	62.006	62.089	54.545	50	332
1640	LInD11-112	Chr11	18313754	18381894	AGCGGCCATTTGGAACATGG	AAACGCATGAAATATTCTTG	20	20	62.061	61.311	45.833	50	335
1641	LInD11-113	Chr11	18314777	18382886	TGGGCTTGAGGTTTTCGGTTTG	AGGAAAAGCTATGTGTGGGGCT	22	22	61.85	61.967	50	50	317
1642	LInD11-114	Chr11	18622321	18694173	TCGTTATTGCGGATGACAGAAA	TGTCTCCGCATCCATCCACT	22	20	61.95	62.007	45.833	50	309
1643	LInD11-115	Chr11	18690169	18807412	GACTTGGGAGCTATATGGGGGC	CAATGGATATGGTCACCGTCGC	22	22	62.272	61.688	59.091	54.545	304
1644	LInD11-116	Chr11	18725525	18834692	GGGGTATGACACGAGGAGTTGT	AGCACTAGCCTTCCTCCAGTTG	22	22	61.733	62.002	54.545	54.545	346
1645	LInD11-117	Chr11	18758714	18869026	TGGATTGCTTGTTGGATGCCAG	CATGCGGGTGTGTGATTTTGGT	22	22	61.728	62.228	50	50	326
1646	LInD11-118	Chr11	18954023	19069836	CCTGAAACCAAGGATAAGGCCT	TGGATCCACTTCATACCAGGGA	22	22	60.025	60.294	50	50	350
1647	LInD11-119	Chr11	19088927	19730426	GAGGGCACTCATAGCTCAACTCA	GCGGTGTGCTCCTACTTTGTG	23	21	62.001	61.795	52.174	57.143	300
1648	LInD11-120	Chr11	19090468	19732000	TGCGTCGGTTATACATATTGGCT	GGGGTGAGAAGAGAGGAGAGGA	23	22	60.244	62.036	43.478	59.091	344
1649	LInD11-121	Chr11	19218371	19854725	GCCATTCAGAACAAAATACGGTGC	CCACGTAGGATCCTAGAGGGGA	24	22	61.431	61.896	45.833	59.091	306
1650	LInD11-122	Chr11	19225802	19873250	TTGTTCTCGGCGAGGTCCTT	CAGGAGTGGCATAAAGAAGC	20	20	61.979	61.573	52.381	54.545	345
1651	LInD11-123	Chr11	19347479	19996189	TGCTCCCATTGTTTTGCTTGTTCT	TTGCACCGGGTCCTACCTTATG	24	22	61.956	62.066	41.667	54.545	350
1652	LInD11-124	Chr11	19401548	20039842	ACCATGCTCCAGTCTGTCACAA	AGGTGGTGCAGTCCAGAACTTA	22	22	61.878	61.291	50	50	332
1653	LInD11-125	Chr11	19426233	20072974	ACTATCGAAGAACAAGGTCATCGAC	GATGATGTGCTGCAATTTCTCAAGG	25	25	60.677	61.186	44	44	300
1654	LInD11-126	Chr11	19585902	20232036	TGGGTAGGTGGCGGAACTTATG	GAGAGGGGAGATTGATCGTCCG	22	22	62.066	61.967	54.545	59.091	306
1655	LInD11-127	Chr11	19585963	20232043	TGGGTAGGTGGCGGAACTTATG	GAGAGGGGAGATTGATCGTCCG	22	22	62.066	61.967	54.545	59.091	306
1656	LInD11-128	Chr11	19606129	20251778	GTCCAGTTCGATCGACCTCACC	TCTAGCGATGCGACGGTGAC	22	20	62.647	62.319	59.091	60	309
1657	LInD11-129	Chr11	19622039	20271490	GGGACGGAGGGAGTACTAAACA	TCCAGCACTCCGTTTTACGTGT	22	22	60.886	62.425	54.545	50	300
1658	LInD11-130	Chr11	19654173	20300889	CCTCAAGTGTCCGTTGGAGGAT	GTCCGTGCTGTAGCTGGCTATA	22	22	61.998	61.907	54.545	54.545	324
1659	LInD11-131	Chr11	19957322	20695972	CACCGTACGTCGTAATTGCACC	GGAGAGTAGGGACGAAGAACCC	22	22	62.096	61.531	54.545	59.091	319
1660	LInD11-132	Chr11	19957928	20696544	AACATATTGGTGGTGGCTTG	GAGCTCCACCCAACTCCACTC	20	21	62.048	61.935	54.545	54.545	346
1661	LInD11-133	Chr11	19958035	20696617	TTGGGTGCTAGATCTCCGTGTG	TTGCTCCAGGAGTTGAGTCTGG	22	22	62.048	61.935	54.545	54.545	346
1662	LInD11-134	Chr11	19997715	20736099	TGCACAAACATACTCCCTCCGT	GTTCGTGGATTGGATTTGGGGG	22	22	61.937	61.788	50	54.545	303
1663	LInD11-135	Chr11	20082717	20821684	CATCACTTCAACCACCCGCTTG	CAAGGCCTTGGTGTTGATGCAT	22	22	62.27	61.989	54.545	50	339
1664	LInD11-136	Chr11	20165820	20896569	CTCCTACAGGGGCAAGATCGAG	ATCACACCCCCAATAACTCCCT	22	22	61.915	60.839	59.091	50	311
1665	LInD11-137	Chr11	20514729	21238895	ACGAATGGTCTCGAAAAGTAAACGA	CCTGATCGGTCACAAACCCGTA	25	22	61.018	62.298	40	54.545	305
1666	LInD11-138	Chr11	20517734	21241944	ACTGCAGTTGCTTATCTTAGC	CAGCACTGCGCAGATATATATG	21	22	60.338	60.679	40	45.833	349
1667	LInD11-139	Chr11	20521000	21245220	CACGAATTCCACCGTTGCCTTT	GTCTGGACTAGTGCGGATCTGG	22	22	62.213	62.159	50	59.091	301
1668	LInD11-140	Chr11	20560591	21279515	TGCACGTCTCCTGTAAGCAAGA	ACGGTGTCAAACATTTTGAAAC	22	22	61.916	61.201	50	41.667	348
1669	LInD11-141	Chr11	20572204	21291162	AGAGAGAGAGAGGGAGAGAGCG	CTCCTTCCTTCTCTCTCACCGC	22	22	61.869	62.098	59.091	59.091	319
1670	LInD11-142	Chr11	20649774	21365571	CGGCGTACGTATCTGCTCGATA	GGGTGTTTGGTTGGCAGCATT	22	21	62.048	61.926	54.545	50	314
1671	LInD11-143	Chr11	20973076	21797604	AGCGCCAACGTGGTATCATC	CTCGGAGGCATCGATATGTG	20	20	61.952	62.215	54.545	50	323
1672	LInD11-144	Chr11	21452767	22501333	CAGAGGTCCTGGTTGTGATCCT	GGAAGTGGCTGCACTAATCTGC	22	22	61.421	61.83	54.545	54.545	349
1673	LInD11-145	Chr11	21460784	22507993	AGCATGTCTAGCACACTGAGGA	CCCCACCAGCCACACCTATAAA	22	22	61.149	62.025	50	54.545	339
1674	LInD11-146	Chr11	21492484	22539115	CCCATTGGGTCAATTGACAATGC	AGGATGAACAGGGTGGAGTAAGT	23	23	60.928	60.762	47.826	47.826	329
1675	LInD11-147	Chr11	21580813	22645247	TACGGCGCAATATCGAGAGGAG	TGGACGATACGACCATGCAACA	22	22	62.013	62.297	54.545	50	350
1676	LInD11-148	Chr11	21754524	22782889	TGGCCAGTGTCCACGTGACAAC	CTCTGTCCCATATTAAGCTC	22	20	61.109	61.806	50	54.545	302
1677	LInD11-149	Chr11	22115753	23135791	TCTGATGGAAAAGTTGGCAGC	ACCTGTAGTAATTTGTCCTGT	21	21	60.752	60.748	45.455	44	317
1678	LInD11-150	Chr11	22232426	23246672	ACCTCGACACGATCACACCAAA	ACGCAGGAATCGGATGAGAGAG	22	22	62.171	61.905	50	54.545	327
1679	LInD11-151	Chr11	22316739	23367821	CCGAGCTCCATATCCACCATCA	TGGAAGCTCAATTTGAGGGGTT	22	22	61.672	60.158	54.545	45.455	331
1680	LInD11-152	Chr11	22320953	23372000	ACCAGGTGTAGCCGTAACTCAG	TATGTGAGTCATGCTGGCCACA	22	22	61.724	62.006	54.545	50	346
1681	LInD11-153	Chr11	22367311	23418568	ACGCGAGTCTCATTTTCTGCTT	ACTTCCCACATCTGCAGCTCAT	22	22	60.868	62.016	45.455	50	332
1682	LInD11-154	Chr11	22475084	23520544	CTGTACCTGTGGTAGTGTTTG	TCCCTTATGTGTGGCTTGAAC	21	21	60.684	62.097	44	47.826	346
1683	LInD11-155	Chr11	22521086	23563502	AGCCACTGGATCAAAAATCGAGT	CTGCTCCTAGACACCACCGAAT	23	22	60.56	61.793	43.478	54.545	320
1684	LInD11-156	Chr11	22971997	23648627	AACAAAATTACTGCATCATG	TGATAATAGCACTGGAGGATC	20	21	62.002	61.835	54.545	50	329
1685	LInD11-157	Chr11	22993571	23680335	CACTTGCGGTAAGCTCAGTTACC	ATGGCAAGGCAATCATTCGTGT	23	22	61.71	61.468	52.174	45.455	339
1686	LInD11-158	Chr11	23099412	23814427	CGATGTCACGATGCAGCAATGT	CCCTTTAACACCCACCATGCAC	22	22	62.123	61.982	50	54.545	316
1687	LInD11-159	Chr11	23251380	24032858	TAGGATCGAGTGACCTGCAGAC	TTTTGGCCTGGTGTTTGCTCAG	22	22	61.265	62.113	54.545	50	330
1688	LInD11-160	Chr11	23449198	24459238	ACTTTCTTTGTGACGGGCCTCT	GAGCCCATTGAAAGCAGACCAC	22	22	62.138	62.031	50	54.545	317
1689	LInD11-161	Chr11	24098888	25048042	AGATGAACTATAGAGGATAC	ACCAGAGATGCCATGTGTAGC	20	21	62.076	62.181	50	54.545	307
1690	LInD11-162	Chr11	24321564	25465566	TCCGCCAGATCTAGGAGAGAGA	ATAATTGATGCCACGCCCATGG	22	22	61.294	61.663	54.545	50	307
1691	LInD11-163	Chr11	24339538	25483529	CAAGGCGAAGATGATGGTGGTG	ACAGATACTCCCTCCATCCCCA	22	22	61.829	61.797	54.545	54.545	337
1692	LInD11-164	Chr11	24358410	25502260	ATCGCTACCACGGGTAAAGCT	CGACGCATTAGCTTCTGTTGCA	21	22	62.056	62.055	50	50	300
1693	LInD11-165	Chr11	24392551	25521765	CCCTCTGAGTGTATGCTCATGCT	GCCCTAGCTTGTACATCCTCCA	23	22	62.068	61.548	52.174	54.545	312
1694	LInD11-166	Chr11	24393967	25523139	TGCTGGGCATTGTTGAATTGCT	ATTAATGCAGACGAGGCAGCAC	22	22	61.933	61.573	45.455	50	306
1695	LInD11-167	Chr11	24516546	25642856	GGCTTCTTTTCGTCCTCTCTCCA	TTGGTGGAGCCTAGACAAAGGG	23	22	62.183	61.952	52.174	54.545	341
1696	LInD11-168	Chr11	24520371	25646627	AATTTAAGGAGGTTACCGCGGT	CAAAGCCTTACCCGAACCCAAC	22	22	60.027	61.968	45.455	54.545	305
1697	LInD11-169	Chr11	24855730	25970240	CACCACTGGACACTCCCATG	TCTTCCCTCACTGATTCTTC	20	20	61.677	60.553	50	45.455	319
1698	LInD11-170	Chr11	24866072	25980619	TAGCTTTGTCCTCGCCAGTAGG	ACGGTGCGTTTAGTGCAAAA	22	20	61.789	61.044	54.545	45.455	306
1699	LInD11-171	Chr11	25065171	26151604	ATTCGCGTATCTCCTCTGACC	CACTTGAGGAAGCTGTTTCGCC	21	22	60.75	62.259	50	54.545	323
1700	LInD11-172	Chr11	25066272	26152657	GCATGTAAATCGCCCTTCCACA	GGTAGGCAGCTGAGGAGTGA	22	20	61.52	61.998	50	54.545	337
1701	LInD11-173	Chr11	25083959	26169187	GGTGATGCGGTGGATAGATGGA	TGAGCGTGTTTGTGTCCAGAG	22	21	61.931	62.369	54.545	50	321
1702	LInD11-174	Chr11	25476074	26348858	TGGAGCTGGAGGAAGAAGAAGG	GGGCACGCAAGGAATTTTCTCA	22	22	61.421	61.971	54.545	50	347
1703	LInD11-175	Chr11	25485787	26359644	CGAGTGTGTGTTTTTGGTGGCT	GGTTGGTGTCCTTGGCATGTTT	22	22	62.087	61.864	50	50	310
1704	LInD11-176	Chr11	25556746	26398000	AGTCTATCGTCACCACCACCAC	TTTTTGGCTAGCCTGGCTTCG	22	21	61.724	61.489	54.545	52.381	300
1705	LInD11-177	Chr11	25758206	26585957	TCGCTTTTGAACGGTCACTC	ATCTGCGACATACTGGTGTG	20	20	61.924	61.952	50	54.545	320
1706	LInD11-178	Chr11	25892589	26780726	ATCTGCAGGTGACACCATGGAA	GCGAAGGTGAAAATGCCGTGTA	22	22	61.955	62.008	50	50	311
1707	LInD11-179	Chr11	25912954	26801090	GTCAACCAGGGCATCTGACTGT	GCAGCTAAGGGATGTTTTGCGT	22	22	62.52	62.027	54.545	50	305
1708	LInD11-180	Chr11	26629428	27876292	TTTTAGCACATAGGGATTAG	GATATCCATGCACAATGCAC	20	20	60.084	61.791	45.833	45.833	324
1709	LInD11-181	Chr11	26702714	28435023	TCGTTTGGCAGCTGAAGATTG	TGGATCAATGGTGCTGTCCG	21	20	62.27	62.074	50	50	319
1710	LInD11-182	Chr11	26811713	28516983	GCTCTCAATTGGATTAGCGCGT	GCGCTTGGTAATTTGCATTGCC	22	22	61.627	62.118	50	50	317
1711	LInD11-183	Chr11	26825449	28543581	GTGGGCTTCTCTACCTCCTT	TTGTTCCAATCCAATCACGC	20	20	62.065	61.39	59.091	45.455	333
1712	LInD11-184	Chr11	26990855	29391093	ACTGTCCGTTCTCACCACACAT	TCAGATGTCGATCGAACACGGT	22	22	61.865	61.767	50	50	326
1713	LInD11-185	Chr11	27393969	30073526	TCATTCCGGTTTCCGTGGCTTA	GTGTGTTCAGGACTCTTTGCCG	22	22	62.256	61.942	50	54.545	339
1714	LInD11-186	Chr11	27405298	30084477	CTATTCACGTACTATGCTTG	GTGAGATGTGTCTTGCTTGC	20	20	61.935	60.554	54.545	50	324
1715	LInD12-1	Chr12	242145	241487	TTGATAAAGAACTTCAGAAG	AAGGAATTGAGAAACACAGG	20	20	61.516	61.454	50	41.667	344
1716	LInD12-2	Chr12	552813	532554	GTGTTGGGCCTGGTCTCTCTAC	TTATGGAGAACGAGGCAGGAGC	22	22	62.309	62.115	59.091	54.545	305
1717	LInD12-3	Chr12	678599	838734	CCCATCCTCCTGTGGAAAACCT	TCCCCTCCATCTACAGTCGACT	22	22	61.967	61.765	54.545	54.545	350
1718	LInD12-4	Chr12	1062915	961838	GATGTGCCAATGGTTGCATC	TCCAGATTTGTTTCTGACAG	20	20	62.032	62.143	50	54.545	330
1719	LInD12-5	Chr12	1779321	1678685	GCACAATACAACCAAACGAGGGT	ACAGAGGCAAGAGCAGAACAGA	23	22	61.857	61.61	47.826	50	319
1720	LInD12-6	Chr12	2970582	2870693	ACGCCGTTGACTTTTTCTCACA	TGGCTGTAACGTACTTCCTCCG	22	22	61.253	62.03	45.455	54.545	306
1721	LInD12-7	Chr12	3562143	3442366	TTTACCTGCAGGCTGCTCTCAT	TCACATCCCAGACGAGAGGTTT	22	22	62.012	61.086	50	50	308
1722	LInD12-8	Chr12	3585967	3466152	GCTAGCTAGTCCCCATATGAT	TGGCGACGTGGACGAATCTTAT	21	22	61.565	62.095	48	50	350
1723	LInD12-9	Chr12	3610013	3490099	CAAGTCATGCTTGCTTTCAA	AAAGTCCTATCCAGCAGGCAGC	20	22	60.277	62.654	40	54.545	349
1724	LInD12-10	Chr12	3610294	3490333	AATTTGGCTGTAGCTGCGTT	CGTACTCCGTACAACACTAG	20	20	62.282	60.084	50	45.833	344
1725	LInD12-11	Chr12	4274796	4077398	ATCAATTACGGTACAAGGTG	ATGCTAATGCATGGAGGAAG	20	20	62.044	61.284	50	50	350
1726	LInD12-12	Chr12	4993393	4795746	ACATCTGCCAGGTACGTTACGT	TGTCCAACTTGTATGGCTAATTGGC	22	25	61.72	61.84	50	44	348
1727	LInD12-13	Chr12	6020457	6056874	ACCCCAGAGGCCAGCGTCTC	TACCACTATTTGCTATCTAC	20	20	62.766	61.909	57.143	50	314
1728	LInD12-14	Chr12	6634875	6649759	CGGATTTGAGTGGTTCATGTTGC	GGAATGGCTCACTACCCGAT	23	20	60.915	61.865	47.826	54.545	302
1729	LInD12-15	Chr12	6796474	6775597	CCACCAGTGGGACTCAGGAT	ATCCCTGTTTCACCCAAGCAG	20	21	61.956	61.898	54.545	50	350
1730	LInD12-16	Chr12	6809524	6788772	GCCATAAGACCCGAAGCTCA	TTCTTCCCTCCTCGTTGGGT	20	20	61.571	62.2	54.545	54.545	340
1731	LInD12-17	Chr12	6812462	6791785	AGGCTATGTCAGGTCGCTAACG	CTGACGTCGTTGAGCCGTTG	22	20	62.154	61.876	54.545	60	340
1732	LInD12-18	Chr12	7286329	7384173	ACTAGATACAACGCGTCCTGCA	TAGAGAGGAGAGAGGGGTGAGC	22	22	61.776	61.827	50	59.091	324
1733	LInD12-19	Chr12	7402721	7421974	TTGGTTTCTTGGGACCGAGTGT	GCTTGTGTCACAGTACGTTGCT	22	22	62.077	61.624	50	50	343
1734	LInD12-20	Chr12	7459018	7561544	CTGACGGTGGAAATGAAGAG	TAGATTATGATTCTGCTTAG	20	20	62	62.077	54.545	54.545	324
1735	LInD12-21	Chr12	7654206	7697332	TCAGCGTGCCACATCATCACTA	TTCTTCGTAGCACCCAGGGAAG	22	22	62.047	61.993	50	54.545	344
1736	LInD12-22	Chr12	7708896	7751449	TCGCCTCATCTAAACTCTGCAT	TGAAGCATGTGGTCATAGGGAC	22	22	61.948	60.093	45.833	50	340
1737	LInD12-23	Chr12	7729144	7770267	AACAACATCATTGGTGGGGTGC	TCCTCGCACCTTGAACAAGACA	22	22	61.93	62.121	50	50	339
1738	LInD12-24	Chr12	8396182	7922052	TACGGCAGCGTTTCTTGTTG	TGCTCAAATTTGGAAGTTTCC	20	21	61.938	60.545	50	47.826	341
1739	LInD12-25	Chr12	8430405	7947275	GTCGGTCCGGCAAAATTCACAA	AGTGTGGAGGAGAGGATAAGGGA	22	23	62.208	61.678	50	52.174	339
1740	LInD12-26	Chr12	8460765	7991674	AGCATCACGAAGACCATGTC	TCTGCTACTTGGCCTTTAACAT	20	22	60.29	60.507	45.455	41.667	338
1741	LInD12-27	Chr12	8499472	8048303	CCGATCTTGGACCCTGTTTCCT	CGACACTCCGGAAGATGGTCAT	22	22	62.009	62.104	54.545	54.545	343
1742	LInD12-28	Chr12	8589239	8168760	TCTTCGAGAGTTGGGCCCAT	TACTACACTGCAATCCGGAG	20	20	61.952	62.404	50	54.545	339
1743	LInD12-29	Chr12	8663870	8235200	TGGGGATGATTTGGGGCATGAT	TGCCCTTCTTTAGTCCTGGTTGA	22	23	62.123	61.527	50	47.826	347
1744	LInD12-30	Chr12	8784909	8373734	CACGGATTTAGTTTCCACCGGC	TGGTGTATGTGCGTCTGTGTCT	22	22	62.073	61.916	54.545	50	324
1745	LInD12-31	Chr12	8935870	8485941	CTGACAGCATTTGAACCGGGAC	CCAAAAGGGTCGTCGTTGTGAC	22	22	62.016	62.186	54.545	54.545	320
1746	LInD12-32	Chr12	8947627	8519051	TGCAAATGTTCTGTTTAGTTCACCG	CGACCCTTTCTAAAGAAACTCAGCC	25	25	60.732	61.817	40	48	307
1747	LInD12-33	Chr12	9042973	8549230	GGTGTCGATTACAACAAGCTAGCT	TGATTGGATGGCTAAAACGAGACA	24	24	61.151	60.565	45.833	41.667	346
1748	LInD12-34	Chr12	9050717	8557059	TTCAGCCCGATTCTTTCCAC	TCAAGGGCGTTGATGGGTAC	20	20	62.071	62.013	54.545	54.545	347
1749	LInD12-35	Chr12	9394566	8852382	GCTCCTGGATGTCAAACGCAAT	AGTGGTGGAGATGTGTAGCTACG	22	23	61.773	61.739	50	52.174	349
1750	LInD12-36	Chr12	9487801	8954084	GCCGGAACTGTACGAGTTTGTG	TCCTCGGTTTGCATTACTCCCT	22	22	61.988	61.422	54.545	50	346
1751	LInD12-37	Chr12	9548647	9014694	TGGGTTCTATCTGGCTCTCAATAGT	AACCCTTCATTCATTTCCCAATCCC	25	25	60.874	61.579	44	44	300
1752	LInD12-38	Chr12	9562979	9027926	CCATCGTATTTTCATTGTCACGTCA	TCCCATAGCAATGCATGGGGTT	25	22	60.164	62.375	40	50	320
1753	LInD12-39	Chr12	9633393	9098337	AGCACACAGGTTAGGGCAGA	GATGTCGCCCTTTCGAAAGC	20	20	61.956	62.012	50	50	334
1754	LInD12-40	Chr12	9769893	9173460	TCCTTCTCCTCCCTCTCAAGCA	GGTTGCTTGGGTGCAGATACAC	22	22	62.246	62.027	54.545	54.545	303
1755	LInD12-41	Chr12	9981649	9430221	ACAATCCCAGTTGGCAAGCAT	GTGAGCAGGTATTTTAAGGCA	21	21	61.989	61.639	50	45.833	313
1756	LInD12-42	Chr12	9991261	9439787	GAGAGAATCAGTGATTGTTG	CTCCTCTCCATAGACTTGTG	20	20	61.829	61.536	47.826	59.091	313
1757	LInD12-43	Chr12	10668900	10334635	GCCTTCTTTGCTGGCAAGAGTT	TTCTCCGAAACTCTGTCAGGCT	22	22	61.914	61.344	50	50	328
1758	LInD12-44	Chr12	10670341	10336262	GCGGCACTCCACTAAGCAAAAT	AGCAAGGCTTTTTCCTGGTTGG	22	22	62.027	61.868	50	50	333
1759	LInD12-45	Chr12	10717545	10382350	CTATTCCTCGCTGCCACCGATC	ATCATCTTCTACCTGGCGACGG	22	22	63.094	61.911	59.091	54.545	339
1760	LInD12-46	Chr12	10838640	10503630	TGCTTATCCCTGCTCACACGTT	GTTGCACGGTAAGGCTCAGTTC	22	22	62.254	62.003	50	54.545	350
1761	LInD12-47	Chr12	10887816	10529831	GTTCACCGGCTCGCTCTTTTAT	TCCTTCACAGTAGCGTCATGGT	22	22	61.25	61.407	50	50	350
1762	LInD12-48	Chr12	11053718	10720510	TGGCTCCCCTATAGCTCAGG	ACGAAGACAATTCTCTCCCA	20	20	62.121	60.444	54.545	41.667	308
1763	LInD12-49	Chr12	11339228	11044325	TCTGGAAGCGAGTCGTTGGA	TCCCTACCAGTCGATTTCAA	20	20	61.983	60.82	50	47.826	332
1764	LInD12-50	Chr12	11355381	11060591	TGTCCTAGCTTCGCCATGCTTA	AAAGCCTCGGAAGTCCTCTGTC	22	22	61.798	61.988	50	54.545	325
1765	LInD12-51	Chr12	11361839	11067080	TCGCTTCGCTCCCATTATGACT	CGTGTGGCAGTCCAACCATTAC	22	22	61.855	62.012	50	54.545	325
1766	LInD12-52	Chr12	11378271	11083547	TGGAGATAGTAAGCTTGGGCCC	CGAAGAATGGCCACAAGAGAGC	22	22	61.556	61.82	54.545	54.545	300
1767	LInD12-53	Chr12	11747082	11214383	AATGCATGAACTCGAGCCATGT	CGAAGCGCATCTCGATAAGAAAAC	22	24	60.943	60.834	45.455	45.833	322
1768	LInD12-54	Chr12	12237450	11756949	GGCCAATGACGCCCCTATCTAT	TAACCCACCCCTCTACCTCTCC	22	22	62.009	62.05	54.545	59.091	338
1769	LInD12-55	Chr12	12354823	11873269	AACAGTTAATTCGGTCGGCAGG	ACAGCAGTTAATTCGTGCCGTG	22	22	61.191	62.001	50	50	314
1770	LInD12-56	Chr12	12442873	11985795	TATCTCTTCTCCCTGTGGGCAG	GTGCCTTTTGGATTTGGAGCCA	22	22	60.957	61.93	54.545	50	304
1771	LInD12-57	Chr12	12485800	12011558	AGCACGATTCCAAAACGTCAT	TAGCAGAGCAACCAGGACAA	21	20	61.604	61.874	43.478	50	301
1772	LInD12-58	Chr12	12640556	12171039	CTGCAGACCACGTAGTCTCA	GTTTAACTCCCAGCCTCCCA	20	20	61.71	61.953	54.545	54.545	324
1773	LInD12-59	Chr12	12649888	12183775	GGCCCATGAGTGTGACCTGATA	TCCCTGTCAGTTTACACACCCT	22	22	61.811	60.962	54.545	50	344
1774	LInD12-60	Chr12	13170585	12887928	GCGGAAGTGGGAAAAGGCCTA	GCATGTGGCTTTCCGATTTCCA	21	22	62.918	62.036	54.545	50	343
1775	LInD12-61	Chr12	13274965	12930534	TCGTCTGTCGACTGCTCTAC	GAAATCAGCTGCACCGCTAG	20	20	61.941	62.053	50	50	314
1776	LInD12-62	Chr12	13398598	13053062	TCGAAAAGGCCGGCAAGAAATC	GATGGGTGGACGGTTCGGATT	22	21	62.022	62.117	50	54.545	344
1777	LInD12-63	Chr12	13463325	13120276	CCTCTGCTCGAAAACTATCCCG	GCTGTTCGTTGTGCCAATCTG	22	21	60.8	61.951	54.545	50	310
1778	LInD12-64	Chr12	13627790	13329456	ACTAGATCCAGCAGAGGGGAG	GCCGGCCATCTGATCTTAGGA	21	21	62.438	62.002	59.091	54.545	349
1779	LInD12-65	Chr12	13765942	13475362	TGATCAACATGGACCGACCGAA	GCAGAAAGATAGCCATGGGGGA	22	22	61.988	62.153	50	54.545	327
1780	LInD12-66	Chr12	14272852	13973520	TGGGTCTCAAGCCTATCTCCCT	TCGTGAGCTCCTGATGGACTTG	22	22	62.058	62.042	54.545	54.545	321
1781	LInD12-67	Chr12	14289959	13990662	GGACCTAGCACCTTCACACCTT	AGCCTGTTTGGGAAAGCTTTGG	22	22	61.942	61.868	54.545	50	323
1782	LInD12-68	Chr12	14887847	15536250	ACAGGCTCAATCACACACAA	TGCTACTACGCAACATCGAG	20	20	61.646	62.088	50	50	302
1783	LInD12-69	Chr12	14925061	15584260	CAAGTCTGCAACAGAGAATGGCT	CTGGGAGAAGAACGCTACGACA	23	22	61.365	62.024	47.826	54.545	340
1784	LInD12-70	Chr12	15093024	16063344	TCGCTACGAATCGGACGGTTAA	TTTGATTGGGAGGTGGAGTCCT	22	22	61.821	61.037	50	50	331
1785	LInD12-71	Chr12	15139450	16070624	TCAGCAGCAGCAGTATCTTCGT	ATCGTCATGTACCTCGCCTACG	22	22	62.042	61.949	50	54.545	315
1786	LInD12-72	Chr12	15300323	16234594	ACATCTCCATCCCCAACTCCAC	GTCGATGATCGCGATGGTGTG	22	21	61.758	61.767	54.545	57.143	338
1787	LInD12-73	Chr12	15401899	16324245	CACGTCAGGGTACGAAGAGGAG	TAACCATCCAGCAGAGCCGTAG	22	22	62.078	61.855	59.091	54.545	322
1788	LInD12-74	Chr12	15571805	16726755	GTGCGCAAGTGCTGAGAAATCT	GGGCACTCTAAAGAAGCTCCCA	22	22	62.01	62.009	50	54.545	304
1789	LInD12-75	Chr12	15632165	16749739	GTGAGTATGTGTAGGGGAGGGC	ACTGTTCCTTTGCATCGTAGCC	22	22	61.866	61.194	59.091	50	308
1790	LInD12-76	Chr12	15664640	16782268	GTGTCGTGCTAGTGTGTTGCTT	CGGTACTTAAAGTTGAGCGCGG	22	22	61.624	62.101	50	54.545	327
1791	LInD12-77	Chr12	15712543	16844740	TGTGTTGAGAAGTATGGGCA	CATGTGTGGGTGCCTACTTT	20	20	62.125	61.075	47.826	50	301
1792	LInD12-78	Chr12	15771308	16901103	TCAAACTCAACTCACATGTCGA	CTGGTCACCATGACTGTCGT	22	20	60.202	62.229	41.667	54.545	301
1793	LInD12-79	Chr12	15803576	16934878	TGCTGCCAGAAAACACATTCCC	TCCGGCAAAATCAATCCCATGA	22	22	61.919	60.623	50	45.455	301
1794	LInD12-80	Chr12	15943078	17053258	TCCCCAATCTGCTTGTACGTGT	GCCCGAATGGTACTTAGCCAGA	22	22	61.937	62.122	50	54.545	331
1795	LInD12-81	Chr12	16390701	17539984	GAAGTCCTACGCTGCATTTCGT	TCGATTTTTGCACGCATGACCA	22	22	61.244	61.956	50	45.455	342
1796	LInD12-82	Chr12	16400351	17551311	ATCTTGTATCTCTTCCATTG	AAACTATCTGTGAAATCTTC	20	20	62.114	62.254	54.545	50	330
1797	LInD12-83	Chr12	16684917	17734374	TATACGTAAGGTCAGAGGCGGC	TCAGTTGGGCTGTACTGTACGT	22	22	61.646	61.339	54.545	50	318
1798	LInD12-84	Chr12	16756350	17805089	TGTGCCCGCAACAAATAATGGA	TGCAGGGTAAACGAGGAACAAC	22	22	61.403	61.066	45.455	50	336
1799	LInD12-85	Chr12	17071407	17973818	TATCGTGCCAAGGAGGACCAAG	GCACATACGTGGGGCTTACTTG	22	22	62.059	61.822	54.545	54.545	333
1800	LInD12-86	Chr12	17103197	17997501	TTGTCATTATCGAATGCATC	TATCACCACTCGTGGAAATG	20	20	60.611	62.034	43.478	54.545	311
1801	LInD12-87	Chr12	18012860	18888880	AAATGGATCTCGGGTGTATC	AAAAGGCACCTCTCCTCTAG	20	20	61.816	62.088	59.091	54.545	346
1802	LInD12-88	Chr12	18231246	19127607	CCCATCGGATGTCAGCCAAAG	ACCACCATCATCAACTCTCC	21	20	62.646	61.587	54.545	47.826	350
1803	LInD12-89	Chr12	18545103	19436505	GTGTGTGTGTGTGTGTGTGTGT	GGGCTCCTACAAACGCTCCTAT	22	22	61.947	61.866	50	54.545	312
1804	LInD12-90	Chr12	18558491	19449935	AGCTCTCACACACCACACAC	GAACCACTTGCATTTGAGCT	20	20	62.13	61.178	50	50	332
1805	LInD12-91	Chr12	18578944	19469045	GACCCTTTCCCTTCCTATGGC	TGGCCTTATAGATAGTTGGTAC	21	22	61.764	60.64	54.545	44	346
1806	LInD12-92	Chr12	18688489	19612853	CATGTGTATGCCCGTTTGACGT	ACATGCCTGGAGTGTCAGTTCA	22	22	61.757	61.878	50	50	350
1807	LInD12-93	Chr12	18717944	19642815	TGAGGGCTGAGGTGAGAGATCT	AAGGCCAATGTGAATGCATGCA	22	22	62.039	61.999	54.545	45.455	346
1808	LInD12-94	Chr12	18765321	19757259	TGTGGCTTATCGAGACGATG	TATGTTTTAGAGACTAGCAC	20	20	61.927	61.991	50	52.174	314
1809	LInD12-95	Chr12	19501978	20695846	AGTTCGTTAGAAGGAGATGGGAACA	CTGGAGGGGGAAGGTTACCAAC	25	22	61.511	62.279	44	59.091	310
1810	LInD12-96	Chr12	19597735	20785061	AGTAGGTCATCAGGGGAGAATATCA	ATGAAGATGCAGGTGGTGACCA	25	22	60.163	61.955	44	50	340
1811	LInD12-97	Chr12	19597741	20785098	AGTAGGTCATCAGGGGAGAATATCA	ATGAAGATGCAGGTGGTGACCA	25	22	60.163	61.955	44	50	340
1812	LInD12-98	Chr12	19765339	21160511	TGTCACATGTCACATCGTTCCA	CTCTCATGCTGCTGCCTCTGTA	22	22	60.224	62.112	45.455	54.545	329
1813	LInD12-99	Chr12	19789449	21184635	GGCGAGATTGTCCATGAACGAC	CCGTTTGTACGTAGAGACCGAGT	22	23	61.868	61.957	54.545	52.174	337
1814	LInD12-100	Chr12	19791569	21186711	GGTCGTGGCGGTTAGGGTTT	ACACTCCAATCTTGCAAAACCA	20	22	62.818	62.08	54.545	40	345
1815	LInD12-101	Chr12	19800422	21204222	CCCAATCGGCCCAGAGAGATA	GAGAGCCACAGGAACAGATCGT	21	22	61.991	62.043	59.091	54.545	302
1816	LInD12-102	Chr12	19801053	21204815	TGAAACCCCAAGATTCACTG	TACAAGGAACAGGCGGCTGT	20	20	60.158	61.933	45.455	50	339
1817	LInD12-103	Chr12	19833621	21237434	TTGGTGTGTTTGGAGTGTGC	CGAAACCACAAGAGGGAGGG	20	20	62.032	62.2	50	54.545	325
1818	LInD12-104	Chr12	19836251	21240047	ATATCTGCCTGGTGCCTGCT	CCTAGGGATCAAGAACGTGCCT	20	22	61.939	61.803	54.545	54.545	336
1819	LInD12-105	Chr12	20019974	21412381	TGAGAGTGGAGCTGGGTAAAGC	CCGCTGGAGGAGGATATTGAGG	22	22	61.998	61.991	54.545	59.091	345
1820	LInD12-106	Chr12	20133210	21587077	CGAGCGGCCAAAGTTTGAAGAT	TAGATGGACAACTGGAGGAGGG	22	22	62.016	60.627	50	54.545	345
1821	LInD12-107	Chr12	20141388	21596002	CGCTGGCATTGTCTGTGAGTAG	TCCATGGAACCACTACAGCAGG	22	22	61.557	62.007	54.545	54.545	307
1822	LInD12-108	Chr12	20426966	21904701	CATCCCAATCAGCATCGAACGG	ACCGTAAGAATAGGCCACGTCA	22	22	61.945	61.468	54.545	50	313
1823	LInD12-109	Chr12	20507138	22005979	TTGATCTATCACAATGTTAG	GCAAGGATTCAGAAGAGGAG	20	20	61.98	62.059	44	54.545	347
1824	LInD12-110	Chr12	20529280	22042394	TTTACAACTGGCATGACGGTGG	TGTCATGCATCAGCGATGTG	22	20	61.39	61.818	50	50	303
1825	LInD12-111	Chr12	20546238	22054871	CTCTGCACAGCAAAGAGATCGC	CGAGTTAACGCCCAGGTAATCC	22	22	62.117	61.057	54.545	54.545	334
1826	LInD12-112	Chr12	20574110	22083874	ACTGAGCGGTAAGGTGCATGT	GAAGTGAACATCCTGCTGGT	21	20	62.052	62.02	52.381	54.545	300
1827	LInD12-113	Chr12	20678108	22166247	AGGGATGCTCAGTATTGCTG	TTTGGGAGCACATTGTGGATG	20	21	61.819	61.985	50	50	316
1828	LInD12-114	Chr12	21449621	22945665	TGAGGCTTGGAGTGAACTCATGT	ATTTTGTGTGCGCTCACGTG	23	20	61.832	62.136	47.826	45.455	328
1829	LInD12-115	Chr12	21450088	22946100	GGCACACACTTGTTCCTTCTCC	TAAGTAGGATTCGCCACCCTGC	22	22	61.644	62.122	54.545	54.545	350
1830	LInD12-116	Chr12	21928311	23425303	AGGTATTGCCGGGAAGGATAG	CGCAAAACCGGATACAAGGCA	21	21	61.942	62.087	54.545	50	305
1831	LInD12-117	Chr12	21967955	23466238	GCAAGGAACCGTAGCAACTTGG	TCTGAACATACGTGCAAACGCA	22	22	62.267	61.373	54.545	45.455	300
1832	LInD12-118	Chr12	22023238	23533725	ACCCTTACAGTCATGCAGAG	GGAGGGGCTCTGAGAGTACT	20	20	61.749	62.353	54.545	59.091	335
1833	LInD12-119	Chr12	22052149	23582957	TTTTGCTGTTTTCGCATGCCAC	GAGCCCTGTGTCAGTGGGTATT	22	22	61.622	62.009	45.455	54.545	318
1834	LInD12-120	Chr12	23002967	24157302	CAAATCGCTGTGGGAGCTTCAA	GGAGAGTTCAGCGTCAACATGC	22	22	61.708	62.06	50	54.545	324
1835	LInD12-121	Chr12	23024786	24177821	CCCGATCCAGCATTCTACCGAT	CTTAAGCTGTGGGCCTCTCCTC	22	22	61.987	62.38	54.545	59.091	343
1836	LInD12-122	Chr12	23141722	24282256	ATGATATCATTGCCGGCGGTT	CACTGTTCACGCACTACAAATC	21	22	61.708	61.835	50	45.833	312
1837	LInD12-123	Chr12	23341038	24448658	CTGTGCCATGTGCTCTTGTCTG	GGATGCACCAAACTCTTACGGC	22	22	62.013	62.077	54.545	54.545	317
1838	LInD12-124	Chr12	23485291	24669824	TAACCAAGTTGGATTTGTAC	ATTGTATTGGTCCAGTAGTG	20	20	60.279	60.82	44	47.826	300
