# Supplementary material for: Development of Whole-Genome Agarose-Resolvable LInDel Markers in Rice
Source: Rice (N Y). 2020 Jan 6;13:1. doi: 10.1186/s12284-019-0361-3 (PMC6944724; doi:10.1186/s12284-019-0361-3)
Supplement: Supplementary file 5 — Additional file 5. The 30-55 bp LInDels between ZS97 and Nipponbare or between MH63 and Nipponbare. [file 12284_2019_361_MOESM5_ESM.xlsx]

## Sheet: ZS97 Nipponbare 30-55 bp InDels
InDel NO.	Chromosome	Nip Position	ZS97 Position	NIPRef	ZS97Query	InDel size	Nip sequence	ZS97 sequence
1	Chr01	27722	12557	TCTTATATGCAAATGCTTATCACTGTCCAATCACCCC	T	36	GGCGGTGGTCGAGCAGCCGCAGCAGCAGGTGGTGAAGCTCTTCAACTGCTGGTCCTTCGAAGACGTTCAGGTTTGCCTGTCCTCCCATTATACTAGTAAGCAAGTAGGGGTACTCGTCTGGTCTGTCGATAACTCTCGTTGGCGCAGGTGAACGACATATCCCTCGCCGACTACCTCGCGGTGTCCTCGACGAAGCACGCCACCTACCTGCCGCACACGGCTGGCCGCTACTCGGCGAAGCGCTTCCGCAAGGCGCAGTGCCCCCTCGTGGAGCGCCTCACCAACTCCCTCATGATGCACGGCCGCAACAACGGCAAGAAGATCATGGCTGTCCGCATCGTCAAGCACGCCATGGAGATCATCCACCTCCTCACCGACGCCAACCCCATCCAGGTCATC…	TGGCGGTGGTCGAGCAGCCGCAGCAGCAGGTGGTGAAGCTCTTCAACTGCTGGTCCTTCGAAGACGTTCAGGTTTGCCTGTCCTCCCATTATACTAGTAAGCAAGTAGGGGTACTCGTCTGGTCTGTCGATAACTCTCGTTGGCGCAGGTGAACGACATATCCCTCGCCGACTACCTCGCGGTGTCCTCGACGAAGCACGCCACCTACCTGCCGCACACGGCTGGCCGCTACTCGGCGAAGCGCTTCCGCAAGGCGCAGTGCCCCCTCGTGGAGCGCCTCACCAACTCCCTCATGATGCACGGCCGCAACAACGGCAAGAAGATCATGGCTGTCCGCATCGTCAAGCACGCCATGGAGATCATCCACCTCCTCACCGACGCCAACCCCATCCAGGTCAT…
2	Chr01	79348	63027	C	CATGATCAAACAGTATAAGTAAAATTGTAAGTA	32	TGCTGTTGGATCTTAACAGAAATCCGTGACTGCCAAAAAAGGCGAAAACCAACGCAGGAATGAGGAGAACAAAGTATCCGGTGTTCGGTTTCATTAGCAATAGTAGCTTGCTGTCGCGGGATCATTTCATGTTGCCATTTTGCTGGTATAAATTAGCCATTTTGCTGGTATAAATTAGCAAGGCGCAAAGGCGTCGGAGACAGCGATAACAATCACTTGTTTTAATAATTTTATTTTTACTCTGCTCTTGTTTTAATACGTCGAGATCCGTTCGTTCGTTCGTTGTTATATCAGTTTTTGGCTCCATTCAGAACAGCGTGGGTAATAAGTACTCCCTTCCCTCCATTCCCTAATATAAAGTATTTTGACATTTTATTTGCACTGTTTGACCACTCGTCT…	GAAATCCGTGACTGCCAAAAAAGGCGAAAACCAACGCAGGAATGAGGAGAACAAAGTATCCGGTGTTCGGTTTCATTAGCAATAGTAGCTTGCTGTCGCGGGATCATTTCATGTTGCCATTTTGCTGGTATAAATTAGCCATTTTGCTGGTATAAATTAGCAAGGCGCAAAGGCGTCGGAGACAGCGATAACAATCACTTGTTTTAATAATTTTACTTTTACTCTGCTCTTGTTTTAATACGTCGAGATCCGTTCGTTCGTTCGTTGTTATATCAGTTTTTGGCTCCATTCAGAACAGCGTGGGTAATAAGTACTCCCTTCCCTCCATTCCCTCCATTCTCTAAATATAAAGTATTTTGACATTTTGCTTGTACTGTTTGACCACTCGTCTTATTAAAA…
3	Chr01	80042	63771	TCGGCCACACATAGCGGCGACCATGCTATGTGGTTTTGGAGGCTCGCCAGCGA	T	52	TCGTTCAAGGGGAGGCTACCTACAAATCCTGACCTAACCCGTACTGATTGTAACTATGATCTATATATTAATAGTAAGTTAATATCAGATCTACACCTTAAAATATAAATTGATATGATGAGTGGAGAGAACAAAGCAGCAACATATACTAAATATCGATGACTTTGCATGTCGACACCTTATTGGGTCCTTTTATATTTGATTGATGATGATGTTTCATCTATTCCATGCCATGCCATAGAAGTACTAACTAGAGTACTCAACTATTTAGAGAAGGAACATTGAGTTTCTTTTGCATATCATCATGGCTTGTGTAGCTTGGTCTTAAATCAGCCATGACATGAATAACGAAAATATAATAATACTATTGAGGTAGCTCTCTTCCCTCTCTTGGTGAAA…	GTTCAAGGGGAGGCTACCTACAAATCCTGACCTAACCCGTACTGATTGTAACTATGATCTATATATTAATAGTAAGTTAATATCAGATCTACACCTTAAAATATAAATTGATATGATGAGTGGAGAGAACAAAGCAGCAACATATACTAAATATCGATGACTTTGCATGTCGACACCTTATTGGGTCCTTTTATATTTGATTGATGATGATGTTTCATCTATTCCATGCCATGCCATAGAAGTAGACTAACTAGAGTACTCAACTATTTAGAGAAGGAACATTGAGTTTCTTTTGCATATCATCATGGCTTGTGTAGCTTGGTCTTAAATCAGCCATGACATGAATAACGGAAATATAATAATACTATTGAGGTAGCTCTCTTCCCTCTCTTGGTGAAA…
5	Chr01	175051	131161	ATTGATGTATGTATTTATACACATAAGTATTTATAATCAATGTGTAATATTTTGAT	A	55	CTTAGTCGCATGCAGCAGGCTGAGAAGAAGCTTTTTATCTCGGTTCTGCTGCTTCAAGCGAGCGTCTCACCAATCGCTCGTCCTATTCTCTATTAGGATTTCTCTCTCTTCCACCTCAGATTTGGGTGACGTGGTCAGTTATTTCGCCGGCTAACTGTGCTTCACTATACTTGCTCTAAATAAGTCAAAGCCTAAAAAATATTAATTATTCCCTCCCTCACAAGAGGAATGTACTAGGGACTAGGAGAGAGCAGCAGCATCAGCAATTAAGGAGACCGGTAGCTGTATCAGTCGTGAATTATTTTTTTTACTAGCTATCAAAGAACAGTCGTACGTGAATGTATTAACCATATATGTGATGGATTGACACACACACATAGTACTCTCTCCGTTACAAAA…	CTTAGTCGCATGCAGCAGGCTGAGAAGAAGCTTTTTATCTCGGTTCTGCTGCTTCAAGCGAGTGTCTCACCAATCGCCCGTCCTATTCTCTATTAGGATTTCTCTCTCTTCCACCTCAGATTTGGGTGACGTGGTCAGTTTTTTCGCCGGCTAACTGTGCTTCACTATACTTGCTCTAAATAAGTCAAAGCCTAAAAAATATTAATTATTCCCTCCCTCACAAGAGGAATGTACTAGGGACTAGGAGAGAGCAGCAGCATCAGCAATTAAGGAGACCGGTAGCTGTATCAGTCGTGAATTATTTTTTTTACTAGCTATCAAAGAACAGTCGTACGTGAATGTATTAACCATATATGTGATGGATTGACACACACACACAGTACTCTCTCCGTTATAAAA…
6	Chr01	227278	190822	CACGACTCAGCCCCTCCGCCGGGTCCCTACGGCC	C	33	CATGTGGGTCCTATCTTTCTCACACACATATAGCCTGTGTGTACGTCTATTTCTTCAAGCAAGGAGACTAGCTAGCTAGTTACTCCACATCTGTATCTGTACGCATGCAAAGTAAACTAGTCCTATTTATTTGTAAATCGTGTGTCTCGTTCTCGTCGATCTCCATCCTAGCACTGTGATAGCTCATGCTTGGATTGAGGGATTGATTGATTTCTTCTCTGAACTTTTTGTGATTGAGCCCACTGTAACTGTAGCGATTACCGGGGGTATTATGGGCCGTGGGTACCCGCGCGGGGCCGGGGACGGGACGGGAGACCCAATCATAAATTGGAGGCGCCGGCCATCTCTCCTCTAGACCTCCTGACTCTAATAAATCTCCTCCATTCCCCCAAATCCATC…	TAGCCTGTGTGTACGTCTATTTCTTCAAGCAAGGAGACTAGCTAGCTAGTTACTCCACATCTGTATCTGTATGCATGCAAAGTAAACTACTCCTATTTATTTGTAAATCTAGGACCTGTGAGTTGTGTGTCTCGTTCTCTTCGATCTCCATCCTATCACTGTGATAGCTCATGCTTGGATTGAGGGATTGATTGATTGATTTCTTCTCTGATTTTTTTGTGATTGAGCCCACTGTAACTGTAGCGATTACCGGGGGTATTATGGCCCGTGGGTACCCGCGCGGGGCCGGGGACGGGACGGGAGACCGGGGATGGGGAACCCAAGCATAAATTGGAGGCGCCGGCCATCTCTCCTCTAGACCTCCTGTCTCTAAATCTCCTCCATTCCCCCAAATCCATC…
7	Chr01	227648	191159	TCCCTACTTGTTCAATTTCGCGCGCGATTCATCC	T	33	TAAATCTCCTCCATTCCCCCAAATCCATCCATCATGGAGTTCCCTCATCGCCACCACCACCACGGCCACCGCGGCGACGACGACGACGACGATCGCCGCCGCCATCCCGCTCCCGCTCCCGCCTACGGCCACGACTCAGCCCCTCCGCCGGGTCCCTACGGCCAAGCGCCTCCTCCGGCTGATCCCTACGCTCGCCACCCGCCTTCCCACGACTACGCTCATCCTCCTCCGGCGTATGGGGGAGGGGGCTACGGCAACGTCGTCCACGTTTCCCACGAGGTCTCCGACCACCAGAGGCCCACGCCGCACTACGGTGGATCCGAGTACATCAGCCCCGTCCAAGAGACCCGCCCTTACCACGGTGGCGGAGGAGCCCCACCGGTGACCCACAGGATCTAC…	CGCCGGCCATCTCTCCTCTAGACCTCCTGTCTCTAAATCTCCTCCATTCCCCCAAATCCATCCATCATGGAGTTCCCTCATCGCCACCACCACCACGGCCACCGCGGCGACGACGACGACGACGATCGCCGCCGCCATCCCGCTCCCGCTCCCGCCTACGGCCAAGCGCCTCCTCCGGCTGATCCCTACGCTCGCCACCCGCCTTCCCACGACTACGCTCATCCTCCTCCGGCGTATGGGGGAGGGGGCTACGGCAACGTCGTCCACGTTTCCCACGAGGTCTCCGACCACCAGAGGCCCACGCCGCACTACGGTGGATCCGAGTACATCAGCCCCGTCCAAGAGACCCGCCCTTACCACGGTGGCGGAGGAGCCCCACCGGTGACCCACAGGATCTAC…
8	Chr01	234773	198230	CATCCGGAACTTCCTGTCTAGTTTCCAGTTC	C	30	AAGCTATACTACAAGCCCAGCCGTTGCCCACGCTGGCTTGTGGTTGAAAGTGCATTAATTCCCCTAGTGGGTTTTGGTGATTAATGACAAATGTGGTTAAGGGACTAATGAGTTCATTGAGTTACTTTCAGGTGTATTAGTCCAAGGTGTGGAAGATGGATGCTTGGAGACCCCCCCAAAAGTATAAAATCAAAGCGGACCGGAACTCGAGAAGTGCATAGGATAGTTTATTTATTGCAATCGAGTTTTTAGGAAAAACCGTACTATTAAGAGGGGTTCCAGGTGATACTCTTAGATATGTCAAGTGCTCTTAGTGTGAACCAAGTGTCAAGTTTCCCTAGGAGTTATTTTTGCAAATACTCAATATGTCCAAAAATGCAAGTCCGGAACTTCCTGTCT…	TACACTACAAGCCCAGCCGTTGCCCACGCTGGCTTGTGGTTGAAAGTGCATTAATTCCCCTAGTGGGTTTTGGTGATTAATGACAAATGTGGTTAAGGGACTAATGAGTTCATTGAGTTACTTTCAGGTGTATTAGTCCAAGGTGTGGAAGATGGATGCTTGGAGACCCCCCCCCCCCAAAGTATAAAATCAAAGCGGACCGGAACTCGAGAAGTGCATAGGATAGTTTATTTATTGCAATCGAGTTTTTAGGAAAAACCGTACTATTAAGATGGGTTCCAGGTGATACTCTTAGATATGTCAAGTGCTCTTAGTGTGAACCAAGTGTCAAGTTTCCCTAGGAGTTATTTTTGCAAATACTCAATATGTCCAAAAATGCAAGTCCGGAACTTCCTGTCT…
9	Chr01	240782	204478	C	CATGGCAAAATGTGTAAATTAATTAATATGG	30	ATGTATATATTTTTTTTAATAATGAAGCATATGTATAAGTATATATACATGCATGTATGGCCGGCGCATGCAATGGCAACGTGATGGGTTCGATCAAATTAAAATGAAGACAAATTAGTTAATTAGAAATGCTAGTTAATTAATTAACTATATGCCATGCATGGCTGCAGAAATCAAGTGAGACGAGAGATGGCTGCAAATACAGATCGAAGCATGTGTCCCCTAGCTTGCGATCGCTAGCAAAATGGTAACCAGCCGCGTTATGGTTAATTTCAAGCTAGGATCATCGATCACCCTGCAGCAGCTAGATTATTTTACCAGTGATAATATTTCTTCATCGCTTGCATGCATATGCATGAGCAGCGTGATCAATCTACATCCACTTAATTGAAGCCATAA…	TGTATAATTTTTTTTTAATAATGAAGCATATGTATAAGTATATATATACATGCATGTATGGCCGGCGCATGCAATGGCAACGTGATGGGTTCGATCAAATTAAAATGAAGACAAATTAGTTAATTAGAAATGCTAGTTAATTAATTAACTATATGCCATGCATGGCTGCAGAAATCAAGTGATACGAGAGATGGCTGCAAATACAGATCGAAGCATGTGTCCCTAGCTTGCGATCGCTAGCAAAATGGTAACCAGCCGCGTTATGGTTAATTTCAAGCTAGGATCATCGATCACCCTGAAGCAGCTAGATTATTTTACCAGTGATAATATTTCTTCATCGCTTGCATGCATATGCATGAGCAGCGTGATCAATCTACATCCACTTAATTGAAGCCATAA…
11	Chr01	301921	282006	GGTCGTCGATCGATCGATCGATGTCGGCCGGAAGCTT	G	36	GGATAAGTAATTTTACTTATCATCCATTTAAACATACTACTAGTAAACAAGCGATTCATTAATATTTATATTTCTCAATGCTCATGTAACCAATCATGTGTGGAACAATGAAGAGTCACGCATTAAATCCGAGAAAGTCATTAAGATGATAGGTTGTTGGATTGAAATATGCCTATCAAAAATAAAATTTTCAGATTTGGAAATATGACTATCAAAAGTAGATGGAGGGAGTATTTCACTTACCAGGCAGGCATGTAATGAACGTGGACGTCATCCAAAATTAAACGAGAGTACGCCCAAGGATAATGATCTAGCTATGTAAGGATCGATATATAAGAGGACACCGAGAGAGTCCCGAAGTTCGCCATGCATCCGGTTGCATGCTGCTCAAGTTGAGCA…	CAATTACCGAGATCACAAAGAGGTCCCTTTTCTGAGGAAAAGGACCGGAACTACTGCTATCTCTCGTCCCTTTATTTCAAAAGCTACATAAAGTATATACTACTAGTTGGAAGCCCAAAAGATCAGATAATACTCTCGCTAATTATTTAGGCCATCTTGATCTTCTCCTACAATGTCACACACCCTACAGATCTCTAATTAATTAAATTGCGTACCCTAGCTAGCTAGTACTATTTCACTTACCAGGCAGGCATGTAATGAACGTGGACGTCATCCAAAATTAAACGAGAGTACGCCCAAGGATAATGATCTAGCTATGTAAGGATCGATATATAAGAGGACACCGAGAGAGTCCCGAAGTTCGCCATGCATCCGGTTGCATGCTGCTCAAGTTGAGCA…
13	Chr01	312576	292676	C	CTAGGCTAGGAATATTATGTTTGTGTACGTCC	31	GCTGGGATCGAACGGTACCAAATTTACAGCAAATTTTTAACTTAAGTAGCATGTTGTATGGAGGATAGGAGGAGTCAGCAAGACCCACAATAAAAGGTGCTGAATGTTTGGGGCAAGATCATCCAAAGTAGTAGCTTTTGTGTCTACTTTTTCTTTTGTGGAGCACATAGGTGACAAGGGCACAACAACTGCTGAAATAAGATAGTAATGTTTTTGAGCCGGCTACTTGATCTAGGAGTATCTTTGCAACGAAAAGTCAATGATTCAGTGGTTCGTCAGCATAAGCTTTTTGCCTAGTACTATGAGATAATGTCAAATGACATGGCTGATTGATAGACCAATCAGTGTGAGCGAGCAACATGAAAGATGTTTTGAAACCGCGTTTGACAGTTGAGGCAA…	GCTGGGATCGAACGGTACCAAATTTACAGCAAATTTTTAACTTAAGTAGCATGTTGTATGGAGGATAGGAGGAGTCAGCAAGACCCACAATAAAAGGTGCTGAATGTTTGGGGCAAGATCATCCAAAGTAGTAGCTTTTGTGTCTACTTTTTCTTTTGTGGAGCACATAGGTGACAAGGGCACAACAACTGCTGAAATAAGATAGTAATGTTTTTGAGCCGGCTACTTGATCTAGGAGTATCTTTGCAACGAAAAGTCAATGATTCAGTGGTTCGTCAGCATAAGCTTTTTGCCTAGTACTATGAGATAATGTCAAATGACATGGCTGATTGATAGACCAATCAGTGTGAGCGAGCAACATGAAAGATGTTTTGAAACCGCGTTTGACAGTTGAGGCAA…
14	Chr01	327581	309685	A	AGGATGCATCATATTTAGTCTTAGAATCGTTTTTTTTTTCTTTT	43	CCACCTTGTGAAGCTACCCGGAAGATCCCTGGTTGTTTCTCCATATCATACTAATAATGTTTAAGCAAATAAATTCATTAACATGCAAATCAAGCCCTGAAGAAGAGCTGAACTGAGCACAGTGATCCATGACAGATTAAACCAAGACACTCACTCTCACCGACGGTGTGAAATTTGCAGGAACATGTACATTACTAAGGAAGAGACTTAATTATTTTATTGGCACATAAAAGATGATGGATGTATCGATGTATTTCAGAGGAGCCTGTTGAGGTAGTCATCGACGGTGGTGTACTGGACGTCCGGGAAGAGCTGGGTGGCCTCAACGGCGGTGGCTGGATCCAACGGCGTCGTCGTCTCCCCCCTTATGTACCCTGCGTGCGCGATCGACAGCACGAT…	AGCTACCCGGAAGATCCCTGGTCGTTTCTCCATATCATACTAATAATGTTTAAGCAAATAAATTCATTAACATGCAAATCAAGCCCTGAAGAAGAGCTGAACTGAGCACAGTGATCCATGACAGATTAAACCAAGACACTCACTCTCACCGACGGTGTGAAATTTGCAGGAACATGTACATTACTAAGGAAGAGACTTAATTATTTTATTGGCACATACACATATACTAAAAGATGATGGATGTATCGATGTATTTCAGAGGAGCCTGTTGAGGTAGTCATCGACGGTGGTGTACTGGACGTCCGGGAAGAGCTGGGTGGCCTCAACGGCGGTGGCTGGATCCAACGGCGTCGTCGTCTCCCCCCTTATGTACCCTGCGTGCGCGATCGACAGCACGAT…
15	Chr01	330312	312482	G	GTCACTGATTCTTCTCCGTTTTTCATCTGCAAAG	33	GGATCAAGCTTGGGCAATAGTCAGCTAACAGATAGTGAATTTCCTAATTAGCGCAACATACCTATCTTACATAACCATGCAACCAAGCAACCCATGTAGTTTTCTCAGTTGCAGATAAGCCACAAAAGAAGGGGGCTGGGGCTCTCTCCCAGATTCAGATAAAGAGGAGGAAGAAGAGGGTCTCCAGTCTTTATTTTATAAGATGACATAGATAGAGCCACCTTCGATCCATTCAATCGATAAATCCTTTGGAATGAAGGAGGGGGTTGTGCAGTTTTACCTTTTGAAGGGCTGATCTACTCCATTTCATCCTATCTTTATATGGGTGCATGAATCAAGCAACTTGGCAGCTGTCGTGGTTGTACCTGATGGTGGTCAGGGTAGGACCGAGCTTAGGTA…	GGATCAAGCTTGGGCAATAGTCAGCTAACAGATAGTGAATTTCCTAATTAGCGCAACATACCTATCTTACATAACCATGCAACCAAGCAACCCATGTAGTTTTCTCAGTTGCAGATAAGCCACAAAAGAAGGGGGCTGGGGCTCTCTCCCAGATTCAGATAAAGAGGAGGAAGAAGAGGGTCTCCAGTCTTTATTTTATAAGATGACATAGATAGAGCCACCTTCGATCCATTCCATCGATAAATCCTTTGGAATGAAGGAGGGGGTTGTGCAGTTTTACCTTTTGAAGGGCTGATCTACTCCATTTCATCCTATCTTTATATGGGTGCATGAATCAAGCAACTTGGCAGCTGTCGTGGTTGTACCTGATGGTGGTCAGGGTAGGACCGAGCTTAGGTA…
16	Chr01	375417	357588	GACAGTGCAAGAACAGGTACCTTACCTTCTG	G	30	ATGCATGGAGCTGGCACGGCAGTAGTGTACAATGCTACTGTAATTTTGTATTGCTACAAGTACTAGACAGGTACAGGGCTGAGGCCAGTGGATGGCTGTAGGCTGGCAGCATACTCCCTCGCCCACAGATCATAATGTATGATCTCCTCCAGTGATGGCCTTGTTACTAGCTCATTCCGATGAGCGTCGCATGTCAGCTCCACCACCTTGAAGATGTCCAGGTACCCGATCCTGCAAAAACATAACCACAATCATCTATTCATTTGCTTATATATATGTAAAGTTTATCTGACGGGAAAATGTCTACTTGCAAAGAAATAGCCGCGGAAACATTAATTCACCAGTTTAAATAACTTGCAATGAAGTTTTGTCAGCCATTCACCATTTAGAAAACAATTC…	CTATGCATGGAGCTGGCACGGCAGTAGTGTACAATGCTACTGTAATTTTGTATTGCTACAAGTACTAGACAGGTACAGGGCTGAGGCCAGTGGATGGCTGTAGGCTGGCAGCATACTCCCTCGCCCACAGATCATAATGTATGATCTCCTCCAGTGATGGCCTTGTTACTAGCTCATTCCGATGAGCGTCGCATGTCAGCTCCACCACCTTGAAAATGTCCAGGTACCCGATCCTGCAAAAACATAACCACAATCATCTATTCATTTGCTTATATATATGTAAAGTTTATCTGACGGGAAAATGTCTACTTGCAAAGAAATAGCCGCGGAAACATTAATTCACCAGTTTAAATAACTTGCAATGAAGTTGTCAGCCATTCACCATTTAGAAAACAATTC…
19	Chr01	409050	387708	A	AAAGATACGCTCCTAGCGTATTCTCTAAAAAAACA	34	TCCTTTTGACTAGGGTATCTACCCGTATTCTCTCTTTTTTCTACATAAATGATTAATGATGTATGCATATGTAAGCACTGCACGTGATTTTTCCTGAAACAATCAAGGGATAGAAAAGAAAAACATGTGATACAAATCTCCTCATTCCATTGCATTTCATGGCATTCTATCTTCAGATAAATCTGAACACTGAGCAACAAGGTGACTTTCAGTTACTTGATTCTTACTCTCTTGCAGATTATATATGTCATACTGAGATTACTCGTCAATGGATTGCTGCTTTGATTTTGTTTATGGACAAGGGATTTTGAAGAGAGGAAAAATTCAGTTGTAAGTGAGGACTGAGGATCAATATGCCATCAGTGAGAGCCTCTCACTCGTTGAGAGAAAGCAATTGCA…	TCCTTTTGACTAGGGTATCTACCCGTATTCTCTCTTTTTCTACATAAATGATTAATGATGTATGCATATGTAAGCACCGTACGTGATTTTTCCTGAAACAATCAAGGGATAGAAAAGAAAAACATGTGATACAAATCTCCTCATTTCATTGCATTTCATGGCCTTCTATCTTCAGATAAATCTGAACACTGAGCAACAAAGGTGACTTTCAGTTACTTGATTCTTACTCTCTTGCAGATTATATATGTCATACTGAGATTACTCGTCAATGGATTGCTGCTTTGATTTTGTTTATGGACAAGGGATTTTGAAGAGAGGAAAAATTCAGTTGTAAGTGAGGACTGAGGATCAATATGCCATCAGTGAGAACCTCTAACTCGTTGAGAGAAAGCAATTGCA…
21	Chr01	479655	448245	A	AGTCACGTTTCTCTAAAAAAGGGCATCTACAC	31	CTTAACTCCTGGAGTACCATAGATTCTTGCTTGTTTGTAACCACGCATCTTCTTTAATTAAAATCACAAACACTACCAAATTAATGATCAAAATCAGGTTACGTAGGAGTAACTGCGTGCACACACCATTCATTTACTGCCTTTTTAAGCTGCATATATATAAACAGAGGCGTTTACAGATGGCCGCGAATGCGTGCGTGCGTGCGTGTAAAAAAAGCCAAGCAAAAAAAAGTTAAAAGAGAAAAGATTTCAAAAGGGTTGGCTGGGTGGCTAAACCTTTTTTGAATTTTGAGGGTCACCAATGTTTTGATACTTACGGAGTGGAAATGATATGAGTTGACATGGTAATTGGTTTTTGTAGGACTAATACTAGTATTTCTGATAGTGGAGTATAACAAT…	ATGCTACTCTTAACTCCTGGAGTACCATAGATTCTTGCTTGTTTGTAACCACGCATCTTCTTTAATTAAAATCACAAACACTACCAAATTAATGATCAAAATCAGGTTACGTAGGAGTAACTGCGTGCACACACCATTCATTTACTGCCTTTTTAAGCTGCATATATATAAACAGAGGCGTTTACAGATGGCCGCGAATGCGTGCGTGTAAAAAAAGCCAAGCAAAAAAAAGTTAAAAGAGAAAAGATTTCAAAAGGGTTGGCTGGGTGGCTAAACCTTTTTTGAATTTTGAGGGTCACCAATGTTTTGATACTTACGGAGTGGAAATGATATGAGTTGACATGGTAATTGGTTTTTGTAGGACTAATACTAGTATTTCTGATAGTGGAGTATAACAAT…
23	Chr01	547170	523491	AGGGCTATTCTCTCTGGGAGGGCGCCGCCCTCTGG	A	34	ATAAAAATTAAGTGTTTTACGCAAAACGAGATGGTAATAACGTGTGATTACTTGAGTTTTAATTATTACAAACTTGAAAAATGAATTAATCTGACATTTTAGAGCAACTTTCATATAAAAAGTTTTTACACGAAACACACCGTGTAGCAGTTTAAAAAGCGTGCCATAAGTATCCAAAATTTTATCTCCGTTTTATTTGGTCATGTCCAAATATCAGGCTAGTCCAGGTCCAGGGACCATGGACAGCAAAATGCGAATCGAACTAAAATTACTGGCCCATGATCGTATACGGGCCTCCCATTGAGGCCATGGATTTGAGGCCTGTGGGCTAATGAAAAGGATATTAGAAGGGCCCATAATATGACAGGCCGGTCTCTAATAGGAGGAATTTTTTTATTT…	ATAAATATTAAGTGTTTTACGCAAAACGAGATGGTAATAACGTGTGATTACTTGAGTTTTAATTATTACAAACTTGAAAAATGAATTAATCTGACATTTTAGAGCAACTTTCATATAGAAAGTTTTCGCATGAAACACACTGTGTAGCAGTTTAAAAAGCGTGCCATAAGTATCCAAAATTTTATCTCCGTTTTATTTGGTCATGTCCAAATATCAGGCTAGTCCAGGTCCAGGGACCATGGACAGCAAAATGCGAATCGAACTAAAATTACTGGCCCATGATCGTATACGGGCCTCCCATTGAGGCCATGGATTTGAGGCCTGTGGGCTAATGAAAAGGATATTAGAAGGGCCCATATTATGACGGGCCGGTCTCTAATAGGAGGAATTTTTTTATTT…
24	Chr01	549687	541643	CTCTCTCTCTCTCTCTCTTTTTCAGTTGTTACTTGTTTCTGCT	C	42	TCACCGGCGGCTGCCTCCCTACCCCCACCTACTCCGGCGGCGGCGCGGCGGAGAAGCACATCACATCATGGCTCCTCCTCCGCACTCGGACTCTGACCTGCTCAAGCCGAGAGACGTCTGCATCGTGGGCGTCGCCCGCACGCCCATCGGCGCCCTGCTCGGCTCCCTCTCCTCCCTCCCCGCCACCAAGCTCGGCTCCGTCGCCATCCAGGGTAAACTCCAGTGCTCCTCTCAGTTTTCTTCTCCTCTTCCTCTCTGAATCCGATTTGGCCATGCTTCCCCACAACCAGCCGCTCTCAGGAGAGCAAATGTGGAGCCGGCGCTCGTGCAGGAGGTCTTCATGGGGAACGTTCTCAGCGCCAACCTTGGCCAAGCCCCGGCGAGGCAAGCCGCCCTAGG…	TCACCGGCGGCTGCCTCCCTACCCCCACCTACTCCGGCGGCGGCGCGGCGGAGAAGCACATCACATCATGGCTCCTCCTCCACACTCGGACTCTGACCTGCTCAAGCCGAGAGACGTCTGCATCGTGGGCGTCGCCCGCACGCCCATCGGCGCCCTGCTCGGCTCCCTCTCCTCCCTCCCCGCCACCAAGCTCGGCTCCGTCGCCATCCAGGGTAAACTCCAGTGCTCCTCTCAGTTTTCTTCTCCTCTTCCTCTCTGAATCCGATTTGGCCATGCTTCCCCACAACCAGCCGCTCTCAGGAGAGCAAATGTGGAGCCGGCGCTCGTGCAGGAGGTCTTCATGGGGAACGTTCTCAGCGCCAACCTTGGCCAAGCCCCGGCGAGGCAAGCCGCCCTAGG…
25	Chr01	563951	555788	TATATATATATATATATATATATATATATATAT	T	32	AGATATCCGAAACAAAAGCAAAATGAGTTTGAGATATTCGAAACTAAACCCATCGATCATTCTACCTCTTGGTGCCCGTTATGGTTCTTGATGATGTGGTCTCTGTACCAGTCGATGGACAGTAACTTTCTGATCGCTGGGCCGGCTTCTCGCAGATCATTCACCGTCTCAAACAGTGGAACAACTCTCAACCTATTCACAAACAATATAACACACTATTCAATCAAACACTGGCCATGGTACAAAACATAATATACGATCTATATGGTGCAAAAACAAGTTCAGTTGGCTTAGCCACTGGCAAAGTAAAAGATCGCAGTCGAATTTTCCTTGCTAGCTCAGAGACACAGTGCGCAATTCCTTCTTTTCCATTTCTACTTAGTTTGCACAATCAACTTT…	AGATATCCGAAACAAAAGCAAAATGAGTTTGAGATATTCGAAACTAAACCCATCGATCATTCTACCTCTTGGTGCCCGTTATGGTTCTTGATGATGTGGTCTCTGTACCAGTCGATGGACAGTAACTTTCTGATCGCTGGGCCGGCTTCTCGCAGATCATTCACCGTCTCAAACAGTGGAACAACTCTCAACCTATTCACAAACAATATAACACACTATTCAATCAGACACTGGCCATGGTACAAAACATAATATACGATCTATATGGTGCAAAAACAAGTTCAGTTGGCTTAGCCACTGGCAAAGTAAAAGATCGCAGTCGAATTTTCCTTGCTAGCTCAGAGACACAGTGCGCAATTCCTTCTTTTCCATTTCTACTTAGTTTGCACAATCAACTTT…
27	Chr01	686638	660962	ATTAGCAGGAGTCACATTTAAGCCTAGGTTAAGTTTT	A	36	TCGCCCTGCTCACCGGAGGTACGTACGTATGTAAGTCGCATCCTTGTTCATCATATGTACCAATAGTGCATAGACATTAATTTCATCTGAATTATATATGCAAAAAAAAAAACATTTCTGAACTTGGTAAGCTTTGCCTTGGAGCAATGAAGGGCAGTCCATGGCCGGGCGAGGCGGCGGCGAGCCACCGCCGGCGCCGACCTCCAGCGGCGGCTCCCATGAAGCTTTCACTTGGCCCGGCTACGGCGACGTGCTGCCGGTGCCACCTCTGTCTCCTGACAAGCAGCACTAGTGCCCCATCAATTGACTTGTTCACCAGATCGGATCGATGGCCGGCCGGGAACTCCATGGATCGATGTGGCTGCAAGTTTTACTGCTCTGCACTAGCAATTTGTAATT…	CCTCACATTGCTGCACATCGCCCTGCTCACCGGAGGTACGTACGTATGTAAGTCGCATCCTTGTTCATCATATGTACCAATAGTGCATAGACATTAATTTCATCTGAATTATATATGCAAAAAAAAAAACATTTCTGAACTTGGTAAGCTTTGCCTTGGAGCAATGAAGGGCAGTCCATGGCCAGGCGAGGCGGCGGCGAGCCACCGCCGGCGCCGACCTCCAGCGGCGGCTCCCATGAAGCTTTCACTTGGCCCGGCTACGGCGACGTGCTGCCGGTGCCACCTCTGTCTCCTGACAAGCAGCACTAGTGCCCCATCAATTGACTTGTTCACCAGATCGGATCGATGGCCGGCCGGGAACTCCATGGATCGATGTGGCTGCAAGTTTTACTGCTCTGC…
28	Chr01	727726	683209	A	AGAGCGCTTGACGATGAGTGAGGTTCCTCTGC	31	CTCCTTGAGCTCTACAATTTTGATATAAAGTTTTATTTCATCTGACTTTATATAATATAATTTTAAATTGTAAAATTATAGAGCTAACAAGTTATGCTGGAAAATTTACATTTAGGTCCCTTGCCGCCCTGTGGAAGGGCGATTTTTAAAAATCGCCCTTCTTGAGGGCGGCAGGCGATTAGATTTGTAAATTTTCGAAACAAAAAATTATTTTTGTAAATATTTTAATAAAAAAAAGTATAAATAAAAAAAATTCGTGCAAACGTTGGCCGAGCGGCACAGTGAGCGAGTCGCTGTCAAACTGAACCGCCGGCCATCTTCTCGCGTGCCGGCCTCCGTCGCTCGCCGGAGTATAACCACAGCATCTACAACCATAATCCTCCACATGAATAGAAAAGC…	AACCCCTTCCGGCTCAACCAAAGCCCGTAAAGCAAAATTCATCAGGCCCATAATTAAACCTGCACTATCTGGGGAATGCTGGGCCGTTGTGCAGTTTTCATGGGCCTCAACAATCTCCCTTTGCAATTCTTTTCGGCCCAAAGTAATGTGCAGGCACCACTCGCAGCCCACCAAAAGCTCGCCATGGTGCTGTGGCAGGTAAAAACTGGGCCTAAGGGTTTGGGCCTTCATCAGGACCGTGCAAACGTTGGCCGAGCGGCACAGTGAGCGAGTCGCTGTCAAACTGAACCGCCGGCCATCTTCTCGCGTGCCGGCCTCCGCCGCTCGCCGGAGTATAACCACAGCATCTACAACCATAATCCTCCACATGAATAGAAAAGCAGAATGTAAGGCACGTTT…
29	Chr01	738133	693733	C	CTTCGGGCTTTACTGATCTCTCTTTACCCAAAGCTTAG	37	CAGGGCCTGAATATGTGAGGGAAACGTGAGAAGACAACGCTGTAGGGCAGAAAATCAACCATGCCATGATACTAAAGCATGTCGCAAAATAAATACCTCCATCATCAAATGTCAGGGAGGGGGAAGCAATCTGCCGTGGAAACCATCGCCGGGCGTCGTGGTGGCGTTTCTAGAGATCCGCGGCGGAGCGCGGGGTCGGGGCAGGGCGAGCTCAACCGCTGGATGCGCTCAGAGCCAGGGCAGCCACGCGCAGTGGCGCTGGGAGCCTGGAAGTCGGGTTGATTTTGGCGCCGGCACCGGCGGCGCCGCCGCCGTCTGCTGGAGCGCCGCCGCAGCCCGCAGGTCGATGGGGAGGGGGGAACTGTGGGGACTGGGTTCAAGCCCAACACACTATCCCGT…	AATCAACCATGCCATGCTACTAAAGCTGGCATAATTTTTTTTAATTAAAATGACAAAATAAATACCTCAACCATCAAATGTCAGGGAGGGGGAAGCAATCTGCCGTGGAATCCATCGCCGGGCGTCATGGTCTGACAAGAGCGAGGCGGCGGAGGCGTTTCTAGAGATCCCGCGGCGGAGCGCGGGGTCGGGGCAGGGCGAGCTCAACCGCTAGATGCGCTCAGAGCCAGGGCAGCCACGCGCAGTGGCGCTGGGAGCCTGGAGGTCGGGTTGATTTTGGCACCGGCACCGCCGCCGCCGCCGCCGTCTGCTGGAGCGCCGCCGCAGCCCGCAGGTCGCCGGGGACTCGGAGGAGTGGGGAACTGTGGGGACTGGGTACAAGCCCAACACACTATCCCG…
30	Chr01	792990	732291	TGATCACAAAGTACGCATCTGTCAGGATGTG	T	30	AATAAAAGTTATTTACAGACAAACACAAAGCAGCAGGGGACTGAGACAGGATACAAGCAGGAAATCAAAGGTGTACGTCTCGCGGTCTGTTTTGGCTACCAAATTCCCTCCTAAAGATTGGGATGGCTTGGTTTGCTTGACGCCATAGCGTGGCCTCTGCTGCCATTCCCTTCACGATGTCCACCCAGGTCCTTTGTTGCTGATTGAATATCCGGCCGTTTCTTTCTTTCCAAATTGTCCATGCCACTAGCGTGACTACCGTGTCAAAGCCCCGCCGAAGATGCTCTCAAATTCTTATTCGACTGCTGCAGAGCCATTGGTAGAATGATGGTTCATCCACCGGCAGACACTCAGGGTGCCCAATTGCCCTTAACACCCACCACCAAAGTTGTCTGGATT…	CTTTGGGGTGATATCTTACAAGTCAGATGTATACAGTTTCGGTATGTTGGTTTTAGAAATGGTGAGTGGAAGAAGGAATCTGGACCCAGGTATTGATAACCAACATGAAGTTTATTTTCTAGAATGGATTTATGAGAAAGTATTCACTGGTTTGGTTTGGTTTGCTTGACGCCATAGCGTGGCCTCTGCTGCCATTCCCTTCACGATGTCCACCCAGGTCCTTTGTTGCTGATTGAATATCCGGCCGTTTCTTTCTTTCCAAATTGTCCATGCCACTAGCGTGACTACCGTGTCAAAGCCCCGCCGAAGATGCTCTCGAATTCTTATTCGATTGCTGCAGAGCCATTGGTAGAATGATGGTTCATCCACCGGCAGACACTCAGGGTGCCCAATTGCCTT…
31	Chr01	845681	787503	ACATTAATTTTATATGTGGCTATCCATTTAGATTTAGTTG	A	39	GTACCAGTATCATATAGACTATGACTCTATGAGCAGAGAGATTATATGGTGCCAACAGAGTAGAGATCTCACTTGATAATGCAGTGATAAGGGGTATGTGGTTTCAACCCCGAGGTCCCGTGTTCAATCCCCAGTATGCTCACAATTTCTTCTTAAAAATTTTTTGGAGGGACGTCTCTCCCTCCAAATCTCCTTTTTTTTTTGGGTGCTAACAGAGTAGAATCCAGAACATGCTTTGCAGACTGCAGTGATCTGTGAGATCATTATATTAGATATTCCATCCTTCTAAATAATTTAAACTAAAGCATTTCTCTTTTTATGGTTGGTTAAGATAAGAATCCTCCCTCCCATCCTATTCCCTTTTATGACTACTAGCTAAATGCCCGTGCTTTGCTGCGG…	GTACCAGTATCATATAGACTATGACTCTATGAGCAGAGAGATTATATGGTGCCAACAGAGTAGAGAGATGCACTTGATAATGCAGTGATAAGGGGTATGTGGTTTCAACCCCGAGGTCCCATGTTCAATCCCCAGTATGCTCACAATTTCTTCTTAAAAATTTTTTGGAGGGACGTCTCTCCCTCCAAATCTCCTTTTTTTTTTGTGCTAACAGAGTAGAATCCAGAACATGCTTTGCAGACTGCAGTGATCTGTGAGATCATTATATTAGATATTTCCGTCCTTCTAAATAATTTAAACTAAAGCATTTCTCTTTTTATGGTTGGTTAAGATAAGAATCCTCCCTCCCATCCTATTCCCTTTTATGACTACTAGCTAAATGCCCGTGCTTTGCTACGG…
32	Chr01	847786	789568	CTTGTTAGAGATTCCACCGGTCGCTAGCTGCCGCCTGCGGCGCCA	C	44	CAATTCCATGGTTTAGAGATATGTTTGATCGATCCGTAGCTTGTATGTATGGTGTAAGATTATTCAACTATATTGTGCTATCAGACATATGGTATATGTATTCATGCAATTCTAATATCCCGTGGATTTGATTTGCAGTGTGATAGTTAAAAGATGATAACTTGATTACCTTATTCTGTCATTGCTACCAGTGCACTAATCCTCCTCGCTGAGCACACATTTTTCGTACCCATCTCATCCCCACACTGCCAATCTACTAACTGTCCTTGTTCTTACCCATCCCATCCCCACAAAGGATCCTGCAGCGCAGGCAACTGATTATCTCATCTCATGTTCACTCCTGGTATTGCATAATTTAGAACAGAAAAAGAAAAAAAAAAAGCAGCACGACAAAGGGAA…	ACAATTCCATGGTTTGGAGATATGTTTGATCGATCCATAGCTTGTATGTATGGTGTAAGATTATTCAACTATATTGTGCTATCGGACATATGGTATATGTATTCATGCAATTCTAATATCCCGTGGATTTGATTTGCAGTGTGATAGTTAAAAGATGATAACTTGATTAACTTATTCTGTCATTGCTGCCAGTGCACTAATCTTCCTCGCTGAGCACACATTTTCTTACCCATCTCATCCCCACACTGCCAATCTACTAACTGTCCTTGTTCTTACCCATCCCATACCCAAAAAGGATCCTACAGCGCAGGCAACTGATTATCTTATCTCATGTTCGCTCCTGGTACTGCATACTTTAGAACAGAAAAAAAAAAAAAGAAAGCAGCACAACAAAGGGAA…
33	Chr01	853874	795325	GCCCCATATATGCGCGGAAATCTAATGGCGAATCCT	G	35	GCATAATACATACAACGTACTGGAGTAAGTAGTAACCGAGAGAGGCTGAAACAATTAATTAGGAAAAAGGAGCTACTACATCCATCCCTAAAAGGGTGGTTTGCTAAAAAGACACTCTTTTAGGGATGGATGTAATGGTTCGGACTATATAACACTCTCATTGGATATTCCTGTATATGTGGTTCTATAAACTCTGGCATACCAGCTATGCACTTGACAATCCACATGCCAAATGCTATTAGGATGCCTGATGGATATCCAATCAAGCAGAACCAGAAATGGAGGTCAATAATAGAGATGACAATAAGCCGATCACTGATGGCAGTGCCTGTACTAGACCTTGGTTCTATTCCATTGCGCAATTCGCTGCAGGTAGAGAAAAAGGAATCAAAGAGGGGA…	CGTACTGGAGTAAGTAGTAACCGAGAGAGTCTGAGACAATTGATCAGGAAAAAGGAGCTACTACATCCATCCCTAAAAGGGTGGTTCGTAGCTAAAAAGACACTCTTTTAGGGATGGATGTAATGGTTCGGACTATATAACACTCTCATTGGATATTCCTGTATATGTGGTTCTATAAACTCTGGCATACCAGCTATGCACTTGACAATCCACATGCCAAATGCTATTAGGAAGCCTTCAGGTGATGGAACTCTGATCATGCAGGACCAGAAAAAAAAGGTCAATAAGAGAGAAGACAATAAGCCGACCACTGATGGCAATGCCTGTACTAGACCTTGGCTCTATTCCAATGCCCAATTCGCTGCAGGTAAAGAAAAAGGAATCAAAGAGGGGAGCCAG…
34	Chr01	928485	833811	CATGGGGCATGGGGGGGTTCAGCTGAACCCCAATTTCTTTCGG	C	42	ATTTCTAGCTGGTCAATAGCCTCTGCCGCATTTTCATCTGTGGTTTCTGGTGCCTGCCGAGCACGCCTCTCTTTTTTCTCATAAACTACAGGATTAGCATTTATTAATCCCACAACCATTTTTCTGATGCAATGCACTAATTTATATCAGAATGGCGAAATTCCTGCAAGTTGAAAACATGGAAATTATACCAATATCAGTCTTGAATAATTTTGTTAATCACTATAAACGTTCAATGGAGATATTCCCCGCCCAATCTATCACTAGTAGTCTACTAGTAATATTATTGTGGACTGTTAATAATCAAGACTAAATTGCGTTCGTTAAACTATGAAATGTAATTTGATCCCTCAACACCCCGATGAAAGAACAGATTGCTAAACAGAAATGCAAAATAGA…	AAGAAAGCACATCAAATATTTCTAGCTGGTCAATAGCCTCTGCCGCATTTTCATCTGTGGTTTCTGGTGCCTGCCGAGCACGCCTCTCTTTTTTCTCATAAACTACAGGATTAGCATTTATCAATCCCACAACCATTTTTCTGATGCAATGCACTAATTTATATCAGAATGGCGAAATTCCTGCAAGTTGAAAACACGGAGTCTTGAATAATTTTGTTAATCACTATAAACGTTCAATGGAGATATTCCCCGCCCAATCTATCACTAGTAGTCTACTAGTAATATTATTGTGGACTGTTAATAATCAAGACTAAATTGCGTTCGTTAAACTATGAAATGTAATTTGATCCCTCAACACCCCGATGAAAGAACAGATTGCTAAACAGAAATGCAAAATAG…
37	Chr01	1031864	906231	T	TTGTTCTTAACAGAGAAAATAGAAAGATGGATGGCCAAT	38	CGTGCAGCCGCAGGCACTGCAGGAACCAGGAAGAAGCAGCTTATATTCTCCCTTCGTTCACGAATACATAAGAGAGATTAAGTTATCTAAAAGTACTAGAGTTTAAAATTATAAGGTTTTGTTTTGTTTTCTCAACACCTTCTTTTTTTATATAAAACGTCGTTAAAACGTCGGTAATGATAGGACCGTTCGAAAAAAAAAAGATTGAAGCGAAATTAACTATGTGTGTACTTGATTAAAAAGGATCACATCTAACTAAAGATATGTAATTATTAGTGAGTGATAAATAAAATGGTTGGATAGATTGAAATATTTGTGGATCTGAAGAGTAGTCAAGTAATGTAGCAAGGTAGCGAAGCAGCAGCAAGAGGGTTCAAGTAGAGCTAGTTGACGCGGCCG…	GCGTGCAGCCGCAGGCACTGCAGGAACCAGGAAGAAGCAGCTTATATTCTCCCTTCGTTCACGAATACATAAGAGAGATTAAGTTATCTAAAAGTACTAGAGTTTAAAATTATAAGGTTTTGTTTTGTTTTCTCAACACCTTCTTTTTTTATATAAAACGTCGTTAAAACGTCGGTAATGATAGGACCGTTCGAAAAAAAAAGATTGAAGCGAAATTAACTATGTGTGTACTTGATTAAAAAGGATCACATCTAACTAAAGATATGTAATTATTAGTGAGTGATAAATAAAATGGTTGGATAGATTGAAATATTTGTGGATCTGAAGAGTAGTCAAGTAATGTAGCAAGGTAGCGAAGCAGCAGCAAGAGGGTTCAAGTAGAGCTAGTTGACGCGGCCG…
38	Chr01	1100955	978523	ATATATATATATATATATATATATATATATA	A	30	AGCCGAAAAAAAGAGAATAAGTACATTTTTAGTGCTCATTTTTTCAGAAGCATTACAATTATAGTTCTATTGAATATGTTTATTTCGAAGCAAACCTATAAAAAAGTATTTTCTTTCTTTTTCCAATTAAATAATTGTTAAATGATGTTTGTATTAATAAAATTAGCAATTAAGCTCTGAAAATTCCAATAAAATTCCAAAGAGCGTAACTAATTATGGAGAATTTAATAAAATTAAATTTAACCATGTCATTTTATTTAACCATGGAGAATGGAGAATTTTACTTGTAAATTTATTTAATTATACACATACCTACTTAAAAATACCAAATATTTCAGCGAGTTTGTATTTTAATTAATTGCATATTTTTCTGATCTGTAAACTTCCCGGTGCAACGCA…	AGCCGAAAAAAAGAGAATAAGTACATTTTTAGTGCTCATTTTTTCAGAAGCATTACAATTATAGTTCTATTGAATATGTTTATTTCGAAGCAAACCTATAAAAAAGTATTTTCTTTCTTTTTCCAATTAAATAATTGTTAAATGATGTTTGTATTAATAAAATTAGCAATTAAGCTCTGAAAATTCCAATAAAATTCCAAAGAGCGTAACTAATTATGGAGAATTTAATAAAATTAAATTTAACCATGTCATTTTATTTAACCATGGAGAATGGAGAATTTTACTTGTAAATTTATTTAATTATACACATACCTACTTAAAAATACCAAATATTTCAGCGAGTTTGTATTTTAATTAATTGCATATTTTTCTGATCTGTAAACTTCCCGGTGCAACGCA…
39	Chr01	1361110	1234918	A	ATATATATATATATATATATATATTATATATATTATATATATATATATT	48	AGGGCGTGCCGGTGCCAGTGTTGATCAGGCAGACCTGCACAAAGTCATCGGGCACCACCACGATGGCCTCCTCATAACGAGAGCCGCCGAGGCCGAGGCTCGTGATGTTCACCATGGTCCAGAAGTTGACGCCAATGTAGAGATGAAACACCGGCAGCTTGTTGAGGCCGTCGTAGTTGCCATACAAGAAAGAGGCGCGGATGAGGTACTTGATCCCAGGCGCCAGCGACCGGGCCGTGTAGCAGTTGCGCGCACCGTCGGGGAAGGCACGCAAGTTGTAGTACCGCTGCGAGAGCTGCGGTTTGATGTACTCCGGCGAAACGTTGTAGTTGGAGCCGCCGTCGGTGAAGTCGTCGTCGGCGACGTAGGATATCTTGGTCGTGTTGTGCACGTAGCTCG…	AGGGCGTGCCGGTGCCAGTGTTGATCAGGCAGACCTGCACAAAGTCATCGGGCACCACCACGATGGCCTCCTCATAACGAGAGCCGCCGAGGCCGAGGCTCGTGATGTTCACCATGGTCCAGAAGTTGACGCCAATGTAGAGATGAAACACCGGCAGCTTGTTGAGGCCGTCGTAGTTGCCATACAAGAAAGAGGCGCGGATGAGGTACTTGATCCCAGGCGCCAGCGACCGGGCCGTGTAGCAGTTGCGCGCACCGTCGGGGAAGGCACGCAAGTTGTAGTACCGCTGCGAGAGCTGCGGTTTGATGTACTCCGGCGAAACGTTGTAGTTGGAGCCGCCGTCGGTGAAGTCGTCGTCGGCGACGTAGGATATCTTGGTCGTGTTGTGCACGTAGCTCG…
40	Chr01	1420768	1285306	TATATATATATATATATATATATATATATATATATATATATATATATATATAT	T	52	AAAACGAGAGCGTAAGTTAGGAAAGGAGAGTGCTGAACATAGCCTAAGTCTGTGTTCTTAAGCGAGAGTTCCCAACTTTTACTCCTCGTTTTTTCCATGAGCACACTTTCCAAAATGATAAACGGTGTGTATATATATATATATAGAGAATCCCTTATATGCCACTGAAAATTGGTCTGATCCTTTATATGCCATTAAAAATTGGCTCTTCCCTTATATGCCATTGATCTAAATTTGCACACCCTCTCATGCCACTCCCGTCAGTTGACTGTGTGTTGACCGTTAATTCTCAAGGAAAAAAGACGTATTTACCCTTCTGAGTATAGGGCATGCCTAACAACTCAGAGAGGACAAATATGTCTTTTTTACTTTAGAGTTAACGGTCAACACACGGTCAAT…	GAGGAAAACGAGAGCTTAAGTTAGGAAAGGAGAGTGCTGAACATAGCCTAAGTCTGTGTTCTTAAGCGAGAGTTCCCAACTTTTACTCCTCGTTTTTTCCATGAGCACACTTTCCAAAATGATAAACGGTGTATATATATAGAGAGAGAATCCCTTATATGCCACTGAAAATTGGTCTGATCCCTTATATGCCATTGAAAATTGGCTCTTCCCTTATATGCCATTGATCCAAATTTGCACACCCTCTCATGCCACTCCCATCAGTTGACTGTGTGTTGACCGTTAATTCTCAAGGAAAAAAGACGTATTTACCCTTCTGAGTATATGGCATACCTAACAACTCAGAGAGGGCAAATATGTCTTTTTTACTTGAGAGTTAACGGTCAACACACGGTCAAT…
41	Chr01	1517597	1371791	T	TTAAACATTTGTTTTTATACGGTGAAAAATATGAACAGGGC	40	GAGCCGCCGTTTCGGCCTAATAACATTAGCTCGGGTAGAAGGAGCCCGAAGAAGCCCATAGAGTTGGGCTCCTTCCCGCCTATTCGCCCATCACGGCCCATAAAATAGGCCCAATTCTCGGTGGCCCAAATAGTGTTGGGCTGGATAGAATGCAAATCGTCCGAGACAGGCCGTGCTGACGGGCTGTAGGGCCCACAGGCATCACGACGGCCGGCGGTAGGTAATTACCGCTGACCTTAGATCATGTTGCCATGTCACGTGGTTATACGGACACATATTTAAATTATTAAACGTAGTTTAATAATAAAATAAATTACAAGATTCGTCTATAAACTGCGAGACGAATTTATTAAGCCTAATTAATATGTCATTAACAAATATTTACTGTAGCACCACATT…	GCCGCCGTTTCGGCCTAATAACATTAGCTCGGGTAGAAGGAGCCCGAAGAAGCCCATAGAGTTGGGCTCCTTCCCGCCTATTCGCCCATCACGGCCCATAAAATAGGCCCAATTCTCGGTGGCCCAAATAGAGTGTTGGGCTGGATAGAATGCAAATCGTCCGAGACAGGCCGTGCTGACGGGCTGTAGGGCCCACAGGCATCACGACGGCCGGCGGTAGGTAATTACCGCTGACCTTAGATCATGTTGCCGTGTCACGTGGTTATACGGACACATATTTAAATCATTAAACGTAGTTTAATAATAAAATAAATTACAGGATTCGTCTATAAACTGCGAGACGAATTTATTAAGCCTAATTAATATGTCATTAACAAATATTTACTGTAGCACCACATT…
42	Chr01	1543302	1390623	GTCACCGGGTGAGTCTCTTCGCCCTCAGTGCCAAATGTAGC	G	40	CTTCATAGACGAATAACTTAGCTGGCCTCCTGGAAAGGGGCATTTCACATGCGGTTGTCTATGAAAATGGACTTCTACAGGAAACCACATCCTACATGTAGAAATACAATATTTCCACGGGCGTTTTTGTTACAAGCAATTGGGCCAACCACCTCTGGAAATCGAATTTATCTGCCCAAAAAAAGATTTTCATAATAGTACTATGAAGTTGGGAAGGTCATGTGATGAAATGGCTTGAGCTACGCATTTTCTCATGCTCCATCTATTTCCAAATTAATATGTCAGCGACAATAATTACTGCTTCACATTAACTACCACCAATACTAACTTCCTATGGTTAAATTATAATAAACAAAAGTTGTATTGTCTTGTTAATCCCTTCTTTATATAAAGTTAAGG…	CTTCATAGACGAATAACTTAGCTGGCCTCCTGGAAAGGGGCATTTCACATGCGGTTGTCTATGAAAATGGACTTCTACAGGAAACCACATCCTACATGTAGAAATACAATATTTCCACGGGCGTTTTTGTTACAAGCAATTGGGCCAACCACCTCTAGAAATCGAATTTATCTGCCCAAAAAAAGATTTTCACAATAGTACTATGAAGTTGGGAAGGTCATGTGATGAAATGGCTTGAGCTACGCATTTTCTCATGCTCCATCTATTTCCAAATTAATATGTCAGCGACAATAATTACTGCTTCACATTAACTACCACCAATACTAACTTCCTATGGTTAAATTATAATAAACGAAAGTTGTATTGTCTTGTTAATCCCTTCTTTATATAAAGTTAAGG…
43	Chr01	1660281	1507552	T	TCTCTCTCTCTCTCTCTCTCTCTCTCTCTCT	30	TAGCACGAGAGCTTACGGTTGAAACCACACACATTACCACTGCACTATCAAGTGTATCTCATCCAACTAGCTAGATGATTATACATAGTAGTATATGGTCTTCCATAACAAGTTAGGTAAAAAATACTAGGCCGACATCAAAATTTGTCTGCATAGATGAAGGAAACAACCTCCAATTCTAAGTGTGCCAGGGAATAATACTCCCTATATATAGATGTATTGCATTGTGCTTCGAAATTAAAAAAACATATTAATTGTTGAATAAAAAACCTATGCGAGTAAAAACATAAGTGTGTTTAAACGTGATCGTCAACTCCCTAGACGACACCATCTCACTAGTTCTTCGGTGTTGTGCCAACGATATTGATCTGTGGTCCCACCGGTGTAGTAGTGTCATAT…	TAGCACGAGAGCTTACGGTTGAAACCACACACATTACCACTGCACTATCAAGTGTATCTCATCCAACTAGCTAGATGATTATACATAGTAGTATATGGTCTTCCATAACAAGTTAGGTAAAAAATACTAGGCCGACATCAAAATTTGTCTGCATAGATGAAGGAAACAACCTCCAATTCTAAGTGTGCCAGGGAATAATACTCCCTATATATAGATGTATTGCATTGTGCTTCGAAATTAAAAAAACATATTAATTGTTGAATAAAAAACCTATGCGAGTAAAAACATAAGTGTGTTTAAACGTGATCGTCAACTCCCTAGACGACACCATCTCACTAGTTCTTCGGTGTTGTGCCAACGATATTGATCTGTGGTCCCACCGGTGTAGTAGTGTCATAT…
46	Chr01	1695631	1542826	T	TCAGAACGCGTATCGGCTTTGATCCGGTCGGCGCCGTCG	38	CGCACAGGCAAGCGATCGCTCTTGCCACGCCACCACTTGTCCCACACATCCTTCCGCGTGATCACCAACTTACAAACGTAATAAGCGCCTCTTCCGGAACGGGATCTTTTCAACGTATTCTCAACGCTAGATCGCTACCGTAGCAGCAACCTCTTGCGTACGTGTGCTTGTTCAAACCTTGCAACCCCTTTATAACTTGGAATTTTGTCCATGGTTCATGTGAAGATTAAAGGGGTGATGTGTGTTTGGTGAAGATGGGGGGGTCCAAATTAACTTGGCCGTGCGTGCCGGGTGATGTGGGCGCATGCGACGAGCCAGCGGTGGTTCCAGCTTTGTCACCTTGTACCGCGTTTCTCGGACACGCAGCGCGCTTGGAGGATCCTTGTCCATTTTTGATCC…	TATCTGGTCCATACCCGCACAGGCAAGCGATCGCTCTTGCCACGCCACCACTTGTCCCACACATCCTTCCGCGTGATCACCAACTTACAAACGTAATAAGCGCCTCTTCCGGAACGGGATCTTTTCAACGTATTCTCAACGCTAGATCGCTACCGTAGCAGCAACCTCTTGCGTACGTGTGCTTGTTCAAACCTTGCAACCCCTTTATAACTTGGAATTTTGTCCATGGTTCATGTGAAGATTAAACGGTACTACCTTTTTTTTCCACTAATAAAGAGGGGTGATGTGTGTTTGGTGAAAGATGGGGGTGCGTGCCGGGTGATGTGGGCGCATGCGACGAGCTCTTTGTCACCTTGTACCGCGTTTCTCGGACACGCAGCGCGCTTGGAGGATCCTTGT…
48	Chr01	1794977	1642522	T	TCTATCTATCTATCTATCTATCTATCTTCTATCTTCTATCTATTATATAC	49	CTCCGGAACAAGAAGCAAAGCTGTTCTCTTCTCTATTGGAAATCCATGCTAGTGCACACTGCAGTCATGCATGTTTCTTTCTTCTTGGCAAGCAACATTATTGGTTTAGCTAGCTAGTTAAAATTTATTTATTTCATATATATGAGCAGTAGCCTTTTAGGCCTTATTAATGTTCTTCAAACTGCCTCGCCTAAAATTGATGTTCTTCAAAAACAATTTAGTGTCATTTTGGAGTACTCTTTTCTTAGATAACAGGAAATTTTCATTACCCAAAACAAACAAGCAGTCATCTGATTACAGGAAAAAAAACATATTTTGGAGTACTATAAGATGCAGCAACTTAAGTTTATAGTCATATGGATGAGTTTTATAGAAGTTTTCAGTTCTTGCTAGTCTGAT…	TCTCTATTGGAAATCCATGCTAGTGCACACTGCAGTCATGCATGTTTCTTTCTTCTTGGCAAGCAACATTATTGGTTTAGCTAGCTAGTTAAAATTTATTTATTTCATATATATGAGCAGTAGCCTTTTAGGCCTTATTAATGTTCTTCAAACTGCCTCGCCTAAAATTGATGTTCTTCAAAAACAATTTAGTGTCATTTTGGAGTACTCTTTTCTTAGATAACAGGAAATTTTCATTACCCAAAACAAAACAAGCAGTCATCTGATTACAGGAAAAAAAAACATATTTTGGAGTACTATAAGATGCAGCAACTTAAGTTTATAGTCATATGGATGAGTTTTATAGAAGTTTTCAGTTCTTGTTAGTCTGATGAATGCCGGTAGGTTGTTGTTGTGTGT…
49	Chr01	1841715	1723836	GCCGTGGCCGCGGCCGCCATCGCCGAGCCCG	G	30	ATGGGACAATCCCAATTTTTTGTTTGGTTGAAGGGATGAGCTACAGATGGGATGAGTGCCGTTTGCTATCACTGTCAGCGAGAAAGAGGAGAGCGAGCGGAGGTGCGACGATGGCTGGCGGCGAGGAGGAGGAGCGGCGCAATATTGCGAGCAGGCGGACGAACAGAGGAGGAGCACGGACAGGCGAGCAGGGGTGCGGTTGGAGGAGCAGGCCGGCGGCGAGCAGGCAGAGGACGCGGATCCGCCTCCAACGCCATCCCCACCACTAGATCCGCCGTCGTCGTCGCTGAGCCCTCCGCGGTCGCCGTCGCTGAGCCTCCGCCGGTCGCCGTCGTCCAGTCCCCCGCGGTCACCGAGCCGAGTCCCCCACGACCGCGGTCGCCGTCGCCGAGTCAAGCC…	ATGGGACAATCCTAATTTTTTGTTTGGTTGAAGGGTTGAGCTACAGATGGGATGAGCGCCGTTTGCTATCACCGTCAGCGAGAAAGAGGAGAGCGAGCGGAGGTGCGACGATGGCTGGCGGCGAGGAGGAGGAGCGGCGCAATATTGCGAGCAGGCGGACGAACAGAGGAGGAGCACGGACAGGCGAGCAGGGGTGCGGTTGGAGGAGCATGCCGGCGGCGAGCAGGCAGAGGACGCGGATCCGCCTCCAACGCCCTCCCCACCACTAGATCCGCCGTCGTCGTCGCTGAGCCCCCCGCGGTTGCCGTCGCTGAGCCTCCGCCGGTCGCCGTCGTCCAGTCCCCCGCGGTCACCGAGCCGAGCCTCCCACGGCCGCGGTCGCCGTCGCCGAGTCAAGCC…
50	Chr01	1842524	1724615	TAAATTAGGTTGTATTTAAATTAGGTTGTATTT	T	32	TCCCATCCCATTCCATCCTTGCAACCAAACACACCTTAGATTTTGGTTGAAATTGGAGATGATGTGACTGATAAGTTGTGTGTATGACAGGTTGATGTGATGGAAAATGACTGAAGTTTGGATCCAAACTTTAGATCTAAATACAGCCTTCGTCCTACTGAACTGAACTAGCTCTCGGATTTCCATCCCAATGTCTTCTTTTCTCCTGGAGTGTTTGGCTACATGCAAATAAAAAGATATACTCCAATACGGAGTGGTAGTAGTATATTGTTTTCTTTATTTTTCCTCTAAAGATTTGGACCTGTGCGTGTCTCCTGGTGGTTTGTTTGACTATTGTCCATCGATGCCGCACTCTGACCACCGCCCAACGACCGTATCAGCAATTCAGCATTCCGAGGC…	ATCCCATCCCATTCCATCCTTGCAACCAAACACACCTTAGATTTTGGTTGAAATTGGAGATGATGTGACTGAAAAGTTGTGTGTATGACAGGTTGATGTGATGGAAAAGGACTGAAGTTTGGATCTAAACTTTATATCTAAATACAGCCTTCGCCCTACTGAACTGAACTAGCTCTCGGATTTCCATCCCAATGTCTTCTTTTCTCCTGGAGTGTTTGGCTACATGCAAATAAAAAGATATACTCCAATACGGAGTGGTAGTAGTATATTGTTTTCTTTATTTTTCCTCTAAGATTTGGACCTGTGCGTGTCTCCTGGTGGTTTGTTTGACTATTGTCCATCGATGCCGCACTCTGACCACCGCCCAACGACCGTATCAGCAATTCAGCATTCCGAGGC…
51	Chr01	1883686	1769021	CATGCCGCGTCAAAACATCTCGCATTGAGTTGATCTTGATACGCAG	C	45	TTTGATTCAGCTTAGAATTATTATAATCTAACTTATTAGTAGTAAGCTGAAACAAACAAATAGATTATTATAGCAGATTATTATAATCTATAAGCCAGATTATTATAATCTAATAAGCTGTTCTAGAGGAGCTTTTTTCAGATTATTGAGTGGCTAAAGACCCACTACCCCTACATACTTGAGAAAAATTACCCACCTATGCCATTAACCGAACAGATAGCTGAGGGCATTATAGACTTTAGCCTTTCAAACCTAATAATCCATACCTCCAATAATCCAGACAAACAAACAACTCACAGCTTATTATATGTCAGCTTATTATAATTCAGCTTATAGTAATCTGGTTTAATAATCTAGATTATAATAATCATAAGCTGAAACAAACAGGGCCTTAGATTC…	TTCAGCTTAGAATTATTATAATCTAACTTATTAGTAGTAAGCTGAAACAAACAAATATATTATGATAGCAGATTATTATAATCTATAAGCCAGATTATTATAATCTAATAAGCTGTTCTAGAGGAGCTTTTTTCAGATTATTGAGTAGCTAAAGATCCACTACCCCTAAATACTTGAGAAAAATTACCCACCTATGCCATTAACCGAACAGATAGCTGAGGGCATTATAGACTTTAGCCTTTCAAACCCAATAATCCATACCTCCAATAATCCAGACAAACAAACAACTCACAGCTTATTATATGTCAGCTTATTATAATTCAGCTTATAGTAATCTGGCTTAATAATCTAGATTATAATAATCATAAGCTGAAACAAACAGTGCCTTAGATTCCAAAT…
52	Chr01	1894831	1780120	TGTTAAGTTTGCACACTATCGCACTATGATTTG	T	32	CTAATTACAGTACAGCCGAATACACGCTTTTGAGTGTTTCTGAAAGGCCACCGTGATGCTAACAGAACATTATCTTCAGTGTTTGCCTATTTTCTTTAGATAATGAAATAAATTTCGGCTTTTCTTGTAACGGAGCTATAATCACTTATTACACAATTCGTCCGAGAGCATATATAATCTAGTAACTCACGATGTAAAGACTAATACTCCCTTCTTCCCTAAATGTTTGACGCCGTTGACTTTTTTAAACATGTTTGACCGTTCGTTTTATTCAAAAACTTTTGTGAATATTATTCAAAAACTTAGAGTAGTAGTATATTTAACAATGAATTAAATGATAAAAAAGAATTAATAATTGCTTAAATTTTTTGAATAAGACGAACGGTCAAATATATTTAA…	CTAATTACAGTACAGCCGAATACACGCTTTTGAGTGTTTCTGAAAGGCCACCGTGATGCTAACAGAACATTATCTTCAGTGTTTGCTTATTTTCTTTAGATAATGAAATAAATTTCGGCTTTTCTTGTAACGGAGCTATAATCACTTATTACACAATTCGTCCGAGAGCATATATAATCTAGTAACTCACGATGTAAAGACTAATACTCCCTTCTTCCCTAAATATTTGACGCCGTTGACTTTTTTAAACATGTTTGACCGTTCGTTTTATTCAAAAACTTTTGTGAATATTATTCAAAAACTTAGAGTAGTAGTATATTTAACAATGAATTAAATGATAAAAAAGAATTAATAATTGCTTAAATTTTTTGAATAAGACGAACGGTCAAATATATTTTA…
53	Chr01	1926617	1802969	AGCTGGAGGAGCTCCTGCGGCTGCCTCTACATGAACTTAGTACGGGG	A	46	AAGGGCTTTATGGGCCTGCTAATTAACTTGAGGAATAAGTTTACTACAGGTCCCTCCACTGTCAAAACCGTTGAGGATGTAAAATGAACTTGTATTGACAATTAAGGGATGTTGTATACCCGGTTTTGTTGTTGAAGGAAGTGAACCAAATTCATCAACAAGTTGAGGGACGTAATATGGATTTTCCTTCAGTTGATCGTCTGCTCTATTGGGCTAGGTCTACGTTTTACCTTGCGTTGGAAAAAGTACACCAAAGGTCACTCAACTTGTCATCGAGTTACAAAACCGTCCTCCTATCGCAAAACCAGATATCAGTCGTCTCTCAACTAATTAAAACCGGTTACAATAGGTCTGACCCGATTTTATTCTACATGGCGGCTGAGTGAGCGTGGAACCAAC…	TGGGCCTGCTAATTAACTTGAGGAATAAGTTTACTACAGGTCCCTCCGCTGTCAAAACCGTTGAGGATGTAAATGAACTTGTATTGACAATTAAGGGATGTTGTATACCCGGTTTTGTTGTTGAAGGAAGTGAACCAAATTCGTCAACAAGTTGAGGGACGTAATATGGATTTTCCTTCACTTGATCGTCTGCTCTATTGGGCTAGGTCTACGTTTTACCTTGCGTTGGAAAAAGTACACCAAAGGTCCCTCAACTTGTCATCGAGTTACAAAATCGTCCTCCCCGATATCAGTGTCTCTCAACTAATCAAAACCGGTCACAAAACCGGTCACAGTAGGTCCGACCCTGGTTTTTTCCTAAATGGCGGCTAAGTCAGCGTGGGACCAACGTGGACCCAC…
54	Chr01	1929303	1805561	C	CCCGCTGCTCAGCCCCTCTACTCCACTCCGCTCATGGC	37	CCGTCGGCATGCTCCGTCCACCGCCGCTTGGCCTGCCCCGCTCTTCCCTGCCGCGGTGGGGTTCCAGACTGTGGCGAGGAGCGCGGAAGCGTGGTCGGGGAGGCCCATGGAGGAGAGGGAAAAGCTGCCGCCGCCCGCGGTTCCTCTCCTCCCACCAGCTGCCGGCGACCGCGCGCCGCTTCTGTCCCTTCTGATGCTTCCCGCGGTTCCTGTTCCACCGGCCGCCGCTCGTGTCTCCTCTCCCACCCGTCTCCGCCGCTCCTCTCCCGTCCCGGTGAGGTCAACGGGTGCGGCGACATCCTTCTTATCTGCCCGCCCTGCTCTGCCCTTCTACTTCCTCTCTCGCCGCCGCCGAAGACGACGACGGCGACGGGTTCGACAACGACCGCCCGCTGCCCT…	CCGTCGGCATGCTCCGTCCACCGCCGCTTGGCCTGCCCCGCTCTTCCCTGCAGCGGTGGGGTTCCAGACTGTGGCGAGGAGCGCGGAAGCGTGGTCGGGGAGGCCCATGGAGGAGAGGGAAAAGCTGCCGCCGCCCGCGGTTCCTCTCCTCCCACCAGCTGCCGGCGACCGCGCTCCGCTTCTGTCCCTTCTGATGCTTCCCGCAGTTCCTGTTCCACCGGCCGCCGCTCGAGTCTCCTCTCCCACCCGTCTCCGCCGCTCCTCTCCCGTCCCGGTGAGGTCAACGGGTGCGGCGACATCCTTCTTATCTGCCCGCCCTGCTCTGCCCTTCTACTTCCTCTCTCGCCACCGCCGAAGACGACGACGGCGACGGGTTCGACAACGACCGCCCGCTGCCCT…
55	Chr01	1932910	1809577	G	GGATGCGGGGGAGGAGGTCGCCGGGAGGCCGTGGCCAGCCG	40	AAAATGAAAAGTAAACTCATTCTCTTTTTGAATAAGTCCATTTTACCTCCCTCATCTCTTGTCCTTCGTCGAATAACATCCCTCAACCAAAAAAACCAGGTATAACGACTCACTCATCTCCGAAAACCAGTGCAAATCGACTCCCAAGACAGTATTGAGTTCAGTTTTAGCTTAGGTGCCATCTAAGTGGCATTCAAAGTAAAAAATTAGGTGGGACCCATGTGGGGCTCACCTATCACCCTTCCCCTCGCTCTTTCATCTCCTCCTCTCTCACAATCTCATGCCTTCAATCGGCTCGAGCAGCGGCGGCGGGTGTGGGGGAGGAGCTCGCCGGGAGGCCACGGCCGGCCGGGCGCAGGGGAGGAGGTCGCCGCCGGGTGGACGCGGGGGAGGAGGTCG…	AAAATGAAAAGTAAACTCATTCTCTTTTTGAATAAGTCCATTTTACCTCCCTCATCTCTTGTCCTTCTTCGAATAACATCCCTCAACAAAAAAAACCGGGTATAACGACTCCCTCATCTCCAAAAACCAGTGCAAATCGACTCCCCAAACAGTATTGAGTTCAGTTTTAGCTTATGTGGCATCTAAGAGACATTCAAAGTAAAAAATTAGGTGGGACCCATGTGGGGCTCACCTATCACCCTTCCCCTCACTCTTTCATCTCCTACTCTCTCACAATCTCATGCCTTCAATCGGCTCGAGCAGCGGCGGCGGGTGTGGGGGAGGAGCTCGCCGGGAGGCCACGGCCGGCCGGGCGCAGGGGAGGAGGTCGCCGCCGGGTGGACGCGGGGGAGGAGGTCG…
56	Chr01	2016067	1932956	GCACTCATCAACTGCGTCCTTGGCCACTTCCCTCCAC	G	36	CTGCGACGCATGCAGAAGAAACGGCGGGGAGTGCAGGTTCCAACAACTTATGTTCCAGTGCGTCAGCTGCCACGGGTTGATCTGCTCGAATTCGACATCTCCATGTAAGAACGCTCTCCCAATTTTCGTTTTCAAGACAATGAAACTAATTTCAGTACTCTCCCACACTTGCTTCTAGTACATGTTCTGTTTGAATTCATTAGTAGCAGTCCAACATCTACAACTCTTACCAATCTAGTAACAAAATAGACCAGGCAAAAATATAGTGCTTCAAAGTTCAAATTACAAAACTGTACCGCTAGGCTTACCGAAGTCAGGAAGGTGTTTTTTTTTTCCCGAGAATGCACAAAAGGCTTGTGCATCTTTTGTATTAAGATTTAGAGAAGTTTGAGATAACAA…	CCAGACTGCGACGCATGCAGAAGAAACGGCGGGGAGTGCAGGTTCCAACAACTTATGTTCCAGTGCGTCAGCTGCCACGGGTTGATCTGCTCGAATTCGACATCTCCATGTAAGAACGCTCTCCCAATTTTCGTTTTCAAGAGAATGAAACTAATTTCAGTACTCTCCCACACTTGCTTCTAGTACATGTTCTGTTTGAATTCATTAGTAGCAGTCCAACATCTACAACTCTTACCAATCTAGTAACAAAATAGACCAGGCAAAAATATAGTGCTTCAAAGTTCAAATTACAAAACTGTACCGCTAGGCTTACCGAAGTCAGAAGGTGTTTTTTTTTTCCCGAGAATGCACAAAAGGCTTGTGCATCTTTTGTATTAAGATTTAGAGAAGTTTGAGATA…
57	Chr01	2022604	1981822	A	ACTCCTCTAGGAGATAAGATTATTCTCGGTTGTGCATGCAGTTGTA	45	CCGCCAGAGCTGCCAGTGACATCTTCTGGTAAGTTCACCCTCCCAGCCTCCCTGAAAGGCTGAAACTATTACTGAAACTATTACGAACACGTTTATTGGCATCTCTTCGATTCTTTCCTCCTGCCATTTCAAACAAGAAAACCACAGCGGTTGGAGACCAGCTAACCGGCCATGTCCTATAGACGAGCGAATAGATCAGTAACAAGTCACAATAAGAAGATGAGTTAGCTTCTTTAAGCACATGATATTAATTCATTATATACTCTATTCACAACCCCGTCCCTCTTCGCCCTTATCTCGGTTACCCTCAGAAGAACCGGCAGTTCAAGTTCCAGATCATCGACATCTTCTACAGCAACAGCTCCTTGCTTGTCACCGATGTCCGAAAGATGGACGACT…	TGGGACCTGCCAGTGACATCTTCTGGTAAGTTCACCCTCCCTGCCTCCCTGAAAAGCTGAAACTATTACTAAAACTATTACGAACACGTTTATTGGCATCTCTTTGATTCTTTCCTCCTGCCATTTCAAACAAGAAAACCACAGCGGTTGGAGACCAGCTAACCGGCCATGTCCTATAGACGAGCGAATAGATCAGTAACAAGTCACAATAAGAAGATGAGTTAGTTTCTTTAATTAAGCACATGATATTAATTCATTATATACTCTATTCACAACCCCGTCCCTCTTCGCCCTTATCTCGGTTACCCTCAGAAGAACCGGCAGTTCAAGTTCCAGATCATCGACATCTTCTACAGCAACAGCTCCTTGCTTGTCACCGATGTCCGAAAGACCGACGAC…
58	Chr01	2155364	2103201	TCTTCTTCTTCTTCTTCTTCTTCTTCTTCTTCTTCTTCTT	T	39	GGCCGTGACGCCGAGCGACGTCGGCAAGCTCAACCGCCTCGTGGTGCCCAAGCAGCAGGCCGAGAGGCATTTCCCGTTCCCGCTCCGCCGCCACAGCTCCGACGCCGCCGGCAAGGGCGTGCTCCTCAACTTCGAGGACGGCGACGGCAAGGTGTGGCGATTCCGGTACTCGTACTGGAACAGCAGCCAGAGTTACGTGCTCACCAAGGGGTGGAGCCGATTCGTGAGGGAGAAGGGCCTCCGACCAGGCGACACCGTGGCCTTCTCCCGGTCGGCGGCGGCGTGGGGGACGGAGAAGCACCTCCTCATCGACTGCAAGAAGATGGAGAGGAACAACCTGGCAACCGTCGACGACGATGCCCGTGTCGTCGTCAAGCTGTTCGGCGTTGACATCGCCGG…	GGCCGTGACGCCGAGCGACGTCGGCAAGCTCAACCGCCTCGTGGTGCCCAAGCAGCAGGCCGAGAGGCATTTCCCGTTCCCGCTCCGCCGCCACAGCTCCGACGCCGCCGGCAAGGGCGTGCTCCTCAACTTCGAGGACGGCGACGGCAAGGTGTGGCGATTCCGGTACTCGTACTGGAACAGCAGCCAGAGTTACGTGCTCACCAAGGGGTGGAGCCGATTCGTGAGGGAGAAGGGCCTCCGACCAGGCGACACCGTGGCCTTCTCCCGGTCGGCGGCGGCGTGGGGGACGGAGAAGCACCTCCTCATCGACTGCAAGAAGATGGAGAGGAACAACCTGGCAACCGTCGACGACGATGCCCGTGTCGTCGTCATGCTGTTCGGCGTTGACATCGCCGG…
59	Chr01	2247020	2195203	T	TACTTGATATATGATTTTTATGGATTGCATTATTCCAGTTGCTC	43	CAATTTTGGTGTGAACTAAACACACCCAAAGTACAAAAGTAGAAAGTTCAGTGAATAGGTGTTGTTCAAACTTCCGTAATTAAGTCTAATGAACAGTATCACCATGCTGGGAGCCTGGGACTACAGAATCTCACAACTCTTGTCGAACGTAGACCTGTATTATGTTGAATAATCTCACATTGGCTGTGGAAGGGTAAGGGACCTAATATAAAAATGGGGGAATCCCTTATCTCATTGGCTAGCTTGTGAGGGTGGGAAAGTTGCTTTATGATCCTACATTCCTACATAGGAGTATTATATACTTCCTGGCAAACTCATAACTCGCCGTTGTTCTTTGTATACATTACAGGGTCTGTGTCAGACGATTACCTGGAATATATGCTATGGCAATTACCAACA…	CCATATTTCGTACTCACTTTACCATTCATCGCAGACTAGTATGAAGGGTTTCAGTTTGGTAAATAGGTGTTGTTCAAACTTCTGTAATTAAGTCCAATGAACAGTATCACCATGCTGGGAGCCTGGGACTACAGAATCTCACAACTCTTGTCGAACGTAGACCTGTATTATGTTGAATAATCTCACATTGGTTGTGGAAGGGTAAGGGACCTAATATAAAAATGGGGGAATCCCTTATCTCATTGGCTAGCTTGTGAGGGTGGGAAAGTTGCTTTATGATCCTACATAGGAGTATTATATATTTCCTGGCAAACTCATAACTCGCCGTTGTTCTTTGTATACATTACAGGGTCTGTGTCAGACGATTACCTGGAATATATGCTATGGCAATTACCAACA…
62	Chr01	2370535	2319683	CGTTGCTGCCAATGGGACCTGTATCGGAGAAGGTCTGGAGAGAAGAGGGTGAACA	C	54	CACATATGCTTGTGGCGATGTGCCATGTCAGTATGTACCGTGCAAGACATCACGATCGAGGTTCAAGTCGATAATGCCTGTCCGGTACATCCACATCCTCCCGTCGGTGATCTTGCCATCGCAGTTGTTGAGCTCACGGAGCACCACCGGCATCAAGCGGACGGAGCGAGTCATCAATGATGAATCAAGGGCCTGGGCCTCGAGAGAGAACCATGAGAGGAAGGTCTTGACCCAGTGAGGTTGGATGTTGTCGAGGATGAAGTATTGGCCGATGGTCCCCTTCCAGTACCTGGTGACAGTGAAATGGCACAACACCTTTAGCGGGACCTCCATTGCCATGACTCATTGCGTACATATCGGCACAACATCTTCACCTTGTGCCAGTCGGAGAAGATAAAG…	CGTGCATACGTGTGACCGAGCAAGACATCACGATCGAGGTTCAAGTCGATAATGCCTGTCCGGTACATCCACATCCTCCCGTCGGTGATCTTGCCATCGCAGTTGTTGAGCTCACGGAGCACAGCGTCCCGCACCACCGGCATCAGGCGGACGGAGCGAGTCATCAATGATGAATCAAGGGCCTGGGCCTCGAGAGAGAACCATGAGAGGAAGGTCTTGACCCAGTGAGGTTGGATGCTGTCGAGGATGAAGTATTGGCCGATGGTCCCCTTCCAGTACCTGGTGACAGTGAAATGGCACAACACCTTTAGCGGGACCTCCATGAATGCCTTGTGCCATGACTCATTGCGTACAGATCGGCACAACATCTTCACCTTGTGCCAGTCGGAGAAGATAAAG…
63	Chr01	2404677	2355100	AAGAGCCTGAAGCTCTTACATAGTTACCAGACTT	A	33	GGACACGCAGTACTTCATTACCAATACCTTTCTTTGATCTGTCAATGCAGACTAAACCAATACTAACTCTTTCTTCAGCGTAGTTATCATGGAGGGTAATCCACACCCTGGAGCTGCAAAGGGTCGAATGTCATTCCTGAATTTCAACCCATCCATTGATGTGAGATTTCAAGATTATTTTTTTATATCTTGTTATTTGCAATATTGTCGTGTTCCCTCACCCAAACCTAGAACTGTAGAAATTAACTCAAGAGGCAACGGGTGGCCGCCAATCACAGTTAGCATCACCTAGTAATAATCATCAGGATGGTTCGAATTCCAGCAGGTTAGCTATTTACCAGCTCTTTTCTGTGCTGTAACTGTTGTTAACCTATAGCTAATTTATCTGTTACAAAATAT…	CGTTACCAATACCTTTGTTTATACTATATTTGATCTGTCAATGCAGACTAAACCAATACTAATTCTTTCTTCAGTGTAGTTATCATGGAGGGTAATCCACACCCTGGAGCTGTAAAGGGTCGAATGTCATTCCTGAATTTCAACCCATCCATTGATGTGAGATTCGAAGATTATTTTTTTACATCTTGTTGCAACATTGTTGTGTTCCCTCACCCAAACCTAGAACTGTAGAAATTAACTCAAGAGGCAACGAGTGGCCGCCAATCACAGTCAGCATCACCTAGTAATAATCATCAGGATGGTTCGAACTCCAGCAGGTTAGCTATTTACCAGCTCTTTTCTGTGTTGTAACTGTTGTTAACTTAGATTAGCTAATTTATCTATTACAAAAATACAAAA…
66	Chr01	2579176	2498825	T	TAAAACGGCCCATAACCATCAAAACGCTTTGG	31	GAATCATCACGAGGCATTTGTTTGGTAGAAAAATATGTAAAGATGTGCCAAAACTGGGAAGTTAATGTTATATAATACCGGAGAAGTCTAGAAATATATTTTATATTTAAAAGCAATTTTTATATAAAAAGTTTTTTTTACCGAACGCACCGTGTGTAAGTTTGAAAAACATGCGAACGAAAACCAAGACAAAATCTAAATCTTAACTAGAGTTTAAATCACATCATGAAGCAACCACCAAACCCGGCCCATAGACACGAGAATGCCCACTCGCATTTGCGATTTCGAAACGAGCGGGCATTATCTTATGGGTAAATTGGAACTATGCCATTATAATTTTGTAAAGTTTGAGATATGCCATCGGTATCTCAATGGCATATAGAACCCAATGACATGTGG…	GAGGCATTTGTTTGGTAGAAAAATATGTAAAGATGTGCCAAAACTGGGAAGTTCATGTTATATAATACCGGAGAAGTCTAGAAATATATTTTATATTTAAAAGCAATTTTTATATATAAAGTTTTTTTTTACGGAACGCACCGTGTGTAAGTTTGAAAAACATGCGAACGAAAACCAAGACAAAATCTAAATCTTAACTAGAGTTTAAATCACATCCTGAAGCAACCACAAAACCTGGCCTATAGACATGAGAATGCCCACTCGCATCTGCGATTTCGAAACGAGCGGGCATTATCTTATGGGTAAATTGGAACCATGCCATTATAATTTTATAAAGTTTAAGACATGTCATCGGTATCTCAATGGCATATAGAACCCACGTGAATCAATGACATGTAA…
67	Chr01	2579272	2498952	A	AATATTCAAATCAGTGCAATTTGACTCTCTCAGCGGTTTTGGAGAACGACTCCC	53	TATTTTATATTTAAAAGCAATTTTTATATAAAAAGTTTTTTTTACCGAACGCACCGTGTGTAAGTTTGAAAAACATGCGAACGAAAACCAAGACAAAATCTAAATCTTAACTAGAGTTTAAATCACATCATGAAGCAACCACCAAACCCGGCCCATAGACACGAGAATGCCCACTCGCATTTGCGATTTCGAAACGAGCGGGCATTATCTTATGGGTAAATTGGAACTATGCCATTATAATTTTGTAAAGTTTGAGATATGCCATCGGTATCTCAATGGCATATAGAACCCAATGACATGTGGGTCAAGATGGCATATCTCAAATTTTACAAAATTATAATGGCATGGTTCCAATTTTCTCTTATCTTATATGAGCCGCTCGATGGCTATAACTGAGGA…	TTTACGGAACGCACCGTGTGTAAGTTTGAAAAACATGCGAACGAAAACCAAGACAAAATCTAAATCTTAACTAGAGTTTAAATCACATCCTGAAGCAACCACAAAACCTGGCCTATAGACATGAGAATGCCCACTCGCATCTGCGATTTCGAAACGAGCGGGCATTATCTTATGGGTAAATTGGAACCATGCCATTATAATTTTATAAAGTTTAAGACATGTCATCGGTATCTCAATGGCATATAGAACCCACGTGAATCAATGACATGTAAGCCAGGATGGCATATCTTAAATTTTGCAAAATTATAATGGCATGGTTCCAATTTTCCCTTATCTTATATGGGCCGCTCGATGGCTATAACCGAGGAGACATAAAACGGCCCATAACCATCAAAACGC…
68	Chr01	2619740	2546384	GGTAAATACTACTCCCTATGTCCCATAATATAAGG	G	34	TCCTTCCCCCTCCGCACCCTGTCGCCCTTCATGGCAGCTGCTGCTCGACTCGCCACCGCCAGTGGCCGCCGCTGCTCACCAAAACGAGAGAGATGCGTTAATGCGCGTCGGGATTTGGTTTTTTTTTTTTTTTACTTTCTACATCCACACAAAATCTTATACTACTATTATGAGAAGAAGAGTATATGCTACTTGTATACATAGGGTTAGGGATGTAGAAAGGCAGAAATAAAAATGGCATAAAAAAATCAGAAACGGGACTGTACGGCGTAAGCACTCAAATACTGATAATAAAGGTAAAAAACACTGAACTGTAAAGTCTTACATTTAATTTTGCATAATAACTATATAATGTGACAAAATAAATTCAAGATTACACTATATAAACTGTAAATTGTC…	CCTTCCCCCTCCGCACCCCGTCGCCCTTCATGGCAGCTGCTGCTCGACTCGCCACCGCCAGTGGCCGCCGCTGCTCACCAAAACGAGAGAGATGCGTCAATGCGCGTCGGGATTTGGGTTTTTTTTTTTTTTACTTTCTACATCCACACAAAATCTTATACTACTATTATGAGAAGAAGAGTATATGCTACTTGTATACATAGGGTTAGGGATGTAGAAAGGCAGAAATAAAAATGGCATAAAAAAAATCAGAAACGGGACTGTACGGCGTAAGCACTCAAATACTGATAATAAAGGTAAAAAACACTGAACTGTAAAGTCTTACATTTAATTTTGCATAATAACTATATAATGTGACAAAATAAATTCAAGATTACACTATATAAACTGTAAATTGTC…
69	Chr01	2638714	2577926	GTGCCTCCCATATCTCAAATCATTGCTCGGAATAAGTCTACTT	G	42	TCACGTAACGTTATATAAATTAGCAAAATTGTATGTGCGTTGCAACGGAAAGAAAAAAAACGAGAAAATTAAATTAAAACATATTAAATTCTAATTTAATGAAATACAAAATTTCTACAATATTAATTATACATTTTAAAATTTTAGCAAAAGTGACAATGCGTTGCAATGAAAAGAAAATAAAAAGAGAAAATTGAATTAAAACATATATATATATATACCTAATAATAAAAAAATACGTAAGACTTCCGGTTCTTCTTTTCGTCCGTCTCCCTCTTGCCAAAATACGTTTTAATCCGCTTAATAGTCGGTCGGAAGTTTTCTAATCTACTCCAAAACCTTGCTTAATATATGATATGTATCAGTAATGTAACCATCAATCACAAGTAGTAGCTTGCC…	AACATAGCAAATATACTGCCTCCAGGCGGTTTTTTTTTTCACGTAACGTTATATAAATTAGCAAAATTGTATGTGCGATGCAACGGAAAGAAAAAAACGAGAAAATTAAATTAAAACATATTAAATTCTAATTTAATGAAATACAAAATTTCTACAATATTAATTATACACTTTGAAATTTTAGCAAAAGTGCCCATGCGTTGCAATGAAAAGAAAATAAAAAGTATATACACACATACCTAATAAAAAAATTCTTCTTTTCGTCCGTCTCCCTCTTGCCAAAAATACGTTTTAATCCGCTTAATAGTCGGTCGGAAATTTTCCAATCTACTCCAAAACCTTGCTTAATATATGATATGTATCAGTCATGTATCCATCAATCACAAGTAGTAGCTTGCC…
72	Chr01	2688107	2633677	C	CGAAGTTTAATTGGAAATAGTAACTGAAACACCGTAAG	37	CATGCTTTTGGGAAACTATAGTCTGTAGTCTTATGTTATGTTTGGTTGCCCTGAGCTTGTTGGAATTAATCTATCTAATTTTGCGCAATTACATCCTGTGAGTATGCTGTTGCCATTTGCATTGTCTTGCAAACTCCTTTGTATGCCACAGGAATTTGATTTCTGGAGCATGGATGTTTGGAGTGTGATACTGTGCTTATTGGCCCATGTAATTTATAAGTACGAGTAGGTTTCATCTAAGGGCACTTTCTGGATGGAGTCCAATATTTTTTTAGCCTGATGGCAATTTTGGTTTTTGATCTTTGCGTTTGAAACAAAAGAAGAGTTGTGTGAATTAGTTAGTACTATATAGTATGACAGCTTGGCCATCACCGTTCTATTTTAGCTGATAACTTTGAC…	CCACAGGAATTTGATTTCTGGAGCATGGATGTTTGGAGTGTGATACTGTGCTTATTGGCCCATGTAATTTATAAGTACGAGTAGGTTTCATCTAAGGGCACTTTCTGGATGGAGTCCAATATTTTTTTAGCCTGATGGCAATTTTGGTTTTTGATCTTTGCGTTTGAAACAAAAGAAGAGTTGTGTGAATTAGTTAGTACTATATAGTATGACAGCTTGGCCATCACCGTTCTATTTTAGCAGATAACTTTGACATCTGAAGTAAGTTTTTTTAGCCTGATGGCAATTTTGGTTTTTGATCTTTGCGTTTGAAACAAAAGAAGAGTTGTGTGAATTAGTTAGTACTATATAGTATGACAGCTTGGCCATCACCGTTCTATTTTAGCTGATAACTTTGAC…
73	Chr01	2702759	2648443	G	GAATTCAACCCTTGCATTTCTTCTTAATTAATTGGCACCAAGTT	43	CTACAATTATTTTTTCATCTAATGCAAATTATAATCGTGCAAGGAGAATAATTTATAATAAAAATCATAATCAAAGCAGAACACTGTTTTGGTAAGTTTTACATAACAAGGAATTAAGTATCTACTGTACTACCACTAAGAGTCAAATAGTAAATTTCACACTGTTTTAGTAATATTGCTCATGAGAAGGCCCCTGGGGTATTCCGGCTAGCACCACAAGGTAGTGGGCTAGCCGGTCCGGGTTCGAGCCTCACTCCTCTTAATAATTTCTTATATGAGAGCCCCTCCTCTCATATCCAATGGGTTTTTTATGGTAATATTTCTCATAAGTTACATAATTCGCCTAAATATCAAATGGAAGAGAAGCGCTTGCTAGCGCAGTGGCAGAGGTATGCGGAT…	ATAATCGTGCAAGGAGAATAATTTATAATAAAAATCATAATCAAAGCAGAACACTGTTTTGGTAAGTTTTACATAACAAGGAATTAAGTATCTACTGTACTACCACTAAGAGTCAAATAGTAAATTTCACACTGTTTTAGTAATATTGCTCATGAGAAGGCCCCCGGGGTATTCCGGCTAGCACCACAAGGTAGTGGGCTAGCCGGTCCGGGTTCGAGCCTCACTCCTCTTAATAATTTCTTATATGAGAGCCCCGCCTCTCATATCCAATGGGTTTTTTATGGTAATATTTCTCATAAGTTACATAATTCGCCTAAATATCAAATGGAAGAGAAGCGCTTGCTAGCGCAGTGGCAGAGGTATGCGGATTCAACCCCGAAGTTCCGTGTTCGACTCTAG…
74	Chr01	2713028	2658760	GCTTATAGCATGCTATTGTACCTGCTCTAATGTGCA	G	35	GAGTACATAACTATCAGCATTCAGCAGATGCTCGTGTGGAAAATTCAGGGTTCATTTTACCTGCATCATAAATAACAATAATTCATGTTTATTTGAGATAGTTAAAATTGATGGATTAAATAAATAGTTTGATCTTTTTATGGCTCTCCTACAAAATCAATCAGATATTTAACAAGTTATTATGCGAAAATTTATATATTATTTTCCACGAACACATTGTTGAGAAGCTGGTCTAGAATAAGAAGAGGGTAAGACGAAAATTAGTCATTCTCGTATGCTTATTTGATTGTTAGCCAACTATTGGCTCCAATTCATTTATAGCTAATCTAATAGCCAATTAATATAATAGTTAGCTATAAAAATATACTACATCATTAATATTCAGTCCTACCTCTCATT…	GTAGGAAGGTGGAGTACATAACTATCAGCATTCAGCAGATGCTCGTGTGGAAAATTCAGGGTTCATTTTACCTGCATCATAAATAACAATAATTCATGTTTATTTGAGATAGTTAAAATTGATGGATTGAATAAATAGTTTGATCTTTTTATGGCTCTCCTACAAAATCAATCAGATATTTAACAAGTTATTCTGAGAAAATTTATATATTATTTTCCACGAACACATTGTTGAGAAGCTGGTCTAGAATAAGAAGAGGGTAAGACGAAAATTAGTCATTCTCGTATGCTTATTTGATTGTTAGCCAACTATTGGCTCCAATTTATTTATAGCTAATCTAATAGCCAATTCATACAATAGTTAACTATAAAAATATACTACATCATTAATATTCAGTCC…
76	Chr01	2786309	2724602	CTCTCTCTCTCTCTCTCTCTATATATATATA	C	30	ATTCAGAAATGGACATTGATTATATTATTGAAATAATTGTAGATCGCTTCAGAAAATGTCCATTTCTGTAAGACTCTCTATTTCACACGTGCAATCAGCATGGGCTAATTCATTGGTTGCTTCAAGGTGGTCTTTATAGTTTTTCTGCACTTCGCGATTACCATACTGCAGTTGCCAGTTTGGGAAAATGAGTTCAGTTTCTTTAAGATAATAAAATATGGGTTCAGTTGTTCACACTGAATAAAAAAGATGAAATTTGTCCAGATTCGATCTAGATTTATAATTTTCTTCTTCTCACATGTTTCACGCGTTGGTAATTCCTATTAGGCGGGTGATCGCTCCTCCATCCGCCCAGCGATCACCCCCCTGCCTCTCTCCTATACTATGTACTCCTCCCTC…	AACTATTCAGAAATGGACATTGATTATATTATTGAAATAATTGTAGATCGCTTCAGAAAATGTCCATTTCTGTAAGACTCTATTTCACACGTGCAATCAGCACGGGCTAATTCATTGGTTGCTTCAAGGTGGTCTTTATAGTTTTTCTGCACTTCGCGATTACCATACTGCAGTTGCCAGTTTGGGAAAATGAGTTAGTTTCTTTAAGATAATAAAATATGGGTTCAGTTGTTCATACTGAATAAAAAAGATGAAATTTGTCCAGATTCGATCGAGATTTATAATTTTCTTCTTCTCACATGTTTCACGCGTTGGTAATTCCTATTGGACGGGTGATCGCTCCTCCATCCGCCCAGCGATCACCCCCCTGCCTCTCTCCTATACTATGTACTCTTCCCT…
77	Chr01	2862743	2794982	GGCCTTGAACTTGAGGACAGCAAGTCTTTTTCTATTGA	G	37	GATAAATCAAGTAACAATAAAATAAATTATAATTACATAAATTTTTTGAATAAGACGAAAGATCAAATGTTTGTCAAAAAGTCAACGGCGTCATACATTAAAATACGGAGGGAGTATAAGCATAAGCGAAAGATGAGGCCGATCGTCTCAAAGCACCGAATAAATCATCAGCAATCAACAGCAGTCAGCTACTCAGCTCGCAGAAGCATCACTGCATCAGCACAGCCTGGTAGAAATATACTATAGAGTTGAAGCTTTTCTAAAACTTCAGAAAATACGTTCTATAACATCCGGCAACTTTTCATTGACAGACAATACAGCAGAACGAGTGCAAATCAATGGGCAATAAAACTAAATAGACGGCACAATAGAATCCAAAACAGGAACAATTCATAAATC…	TAAATCAAGTAACAATAAAATAAATTATAATTACATAAATTTTTTGAATAAGACGAAAGGTCAAATGTTTGTCAAAAAGTCAACGGCGTCATTCATTAAAATACGGAGGGAGTATAAGCATAAGCGAAAGATGAGGCCGATCGTCTCAAAGCACCGAATAAATCATCAGCAATCAACAGCAGTCAGCTACTCAGCTCGCAGAAGCATCACTGCATCAGCACAGCCTGGTAGAAATATACTATAGAGTTGAAGCTTTTCTAAAACTTCAGAAAATAGGTTCTATAACATCCGGCAACTTTTCATTGACAGACAATACAGCACAACGAGTGCAAATCAATGGGCAATAAAACTAAATAGACGGCACAATAGAATCCAAAACAGGAACAATTCATAAATCAT…
78	Chr01	2879435	2812100	T	TTTCTTGTTGTGAATATGTTTTTATGTGTACTCAGGGCA	38	TTAGTGATGCATTTTTGGGCAGTAGCTTCAAGATTTTTGCAGATACATTAGAAAACGGGGGTGTCATCAAGGCATTATGTGTTCCTGGTGGTGCCAAAGAATTTTCAAATACTGACCTAAAGAAAGGAACTGTCTACACTGAAGCTTCCAAAGCTGGAGCCAAGGGCCTGCCTTTTCTCAAAGTTATGGACAATGGTAAAATAATTTTTGCACTCTTTTGGTTGATAAACTTTTTGGCCTGGCCAATGAATTTGTTTTGTGGTTTAATTGGTCTGCTGCTCACAGGAGAGCTTGAAGGAATTGGTCCACTCGTGGCAAGTCTGAAACCTGAAAAGAAAGAGCAGTTGTTGAAACATCTAGATGCAAAATCAGGTGATCTTATCCTGTTTGCACTGGGTG…	TTAGTGATGCATTTTTGGGCAGTAGCTTCAAGATTTTTGCAGATACATTAGAAAACGGGGGCGTCATCAAGGCATTATGTGTGCCTGGTGGTGCCAAAGAATTTTCAAATACTGACCTAAAGAAAGGAACTGTCTACACTGAAGCTTCCAAAGCTGGAGCCAAGGGCCTGCCTTTTCTCAAAGTTATGGACAATGGTAAAATAATTTTTGCACTCTTTTGGTTGATAAACCTTTTGTCCTGGCCAATGGATTTGTTTTGTGTTTTAATTGGTCTGCTACTCACAGGAGAGCTTGAAGGAATTGGTCCACTCGTGTCAAGTCTGAAACCTGAAAAGAAAGAGCAGTTGTTGAAACATCTAGATGCAAAATCAGGTGATCTTATCCTGTTTGCACTGGGTG…
79	Chr01	2903723	2836849	TGGTGGCAGGACGGCCGGCAGTCAACCCGATG	T	31	AGCTCGATTGACCTGGTGCTCCTTGGCCCCGCCCTGCCTTGATCCGTGCGAGGCGACGATGCGCCTAGACGATACGGGGGAAGCGAAGGATCCGACGACGGAGTTGTAGACGACATTGGAGGGAGCCCGCTGAGATAGAGAGCGCCATAGGGGATACCTCCGCGCTGGTCCTGGAGCTTGACGGCCCGCGCGGGGCCTTGATACGCGCCTGCTCACCAGCTAGCGCTGCCTCATATAGACGAGTAGGGACGGCGGCGGAGGTCCACGCCGTCGCTACATCCGCGGGGATCAGCTCGGCTCAACGCCACCCTGCTTGTCGCCGGCTTCCTTTACCGCCTCTGCGATCAACCGCTCGCATCGTCTCCTCGATATCCTCCTTGCCGCTTCTGCCACCATGGC…	AGCTCGATTGACCTGGTGCTCCTTGGCCCCGCCCTGCCTTGATCCGTGCGAGGCGACGATGCGCCTAGACGATACGGGGGAAGCGAAGGATCCGACGACGGAGTTGTAGACGACATTGGAGGGAGCCCGCTGAGATAGAGAGCGCCATAGGGGATACCTCCGCGCTGGTCCTGGAGCTTGACGGCCCGCGCGGGGCCTTGATACGCGCCTGCTCACCAGCTAGCGCTGCCTCATATAGACGAGTAGGGACGGCGGCGGAGGTCCACGCCGTCGCTACATCCGCGGGGATCAGCTCGGCTCAACGCCACCCTGCTTGTCGCCGGCTTCCTTTACCGCCTCTGCGATCAACCGCTCGCATCGTCTCCTCGATATCCTCCTTGCCGCTTCTGTCACCATGGC…
80	Chr01	2905196	2838293	ATTGGAAAAGACTATAGAAGGAGGATTTGGGGAA	A	33	GACAATCTCTATATTGTGAGATAAATATAGGTGGAGGGTATATCATATACTGACCATATAGGTAAGTAGGTGGCACTAATAGTAAACAACCTTAAGCTTTCAGTCCTCTAACCATATCTAATCATACCAATTATAAATATATGTTATTTACTCTGTCTAATGGAAGAGAAAAAAGGTTTGAAAGTAAATAGGCAAGTATTACAAATAAAATAAAATAAAGTTTTTTAAATTTTTTTTCCGTAGTAATGCTTTAACAAAGCTTAAAATCTTTATATGAATAGGGTTACTACAGGTTAATTGTTCCTCAACCTTTTCAAAAGTCATTAAATAGTTTCTTCTAAATGAACAAGTGTATATATTTTTTTCTAAAAAAAGTAAAATATTGCATTTGAAACTCTT…	ATAATCTCTATATTGTGAGATAAATATAGATGGAGGGTATATCATATACTGACCATATAGGTAAGTAGGTGGCACTAATAGTAAACAACCTTATGCTTTCAGTCCTCTAACCATATCTAATCATACCAATTATAAATATATGTTATTTACTCTGTCTAATGGAAGAGAAAAAAGGTTTGAAAGTAAATAGGCAAGTATTACAAATAAAATAAAATAAAGTTTTTAAAATTTTGTTTTCCGTAGTAATGCTTTAACAAAGCTTAAAATCTTTATATGAATAGGGTTACTACAGGTTAATTGTTCCTCAACCTTTTCAAAAGTCATTAAATAGTTTCTTCTAAATGAACAAGTGTATATATTTTTTTCAAAAAAAAGTAAAATATTGCATTTGAAACTCTT…
81	Chr01	2959021	2879876	A	ATTCTTACGTGCATTTCTGCCACAATTCAAAATTATGCTG	39	TTCCTAATCCTAGTCGTTGCCTTGATCGCCAAACCATGACTTTGGCTGTCAAGACTTAGTAGATATTTTTCTCTTTTTTTTTTGAGAAAAAGATGGAAGGAGTGTTACTTTTCAGAACGGGACATAATAAAAAAAAAGTTTTATAAGAACCACTTGGTACTTTTCTGAGTATTATAGAAGAACAACTTCACTGAACAAAAACTATGTAGCCATGCACCTCTTGGCTCTTGCAACGAAATTTACATGACCGTACTTATTACTAGTATAGACTATAGAGCTATGATTTTATCCGGAAATTTGAGATTACAGTTTGAATGTTCGTGTGATGAGATCAGACTCTTGAGTGATCCAAAGAAGTTATTGAGTCCAGCATCAGTGATGCTCTGTCTCAGCTTTCGA…	GCTTCCTAATCCTAGTCGTTGCCTTGATCGCCAAACCATGACTTTGGCTGTCAAGACTTAGTAGATATTTTTCTCTTCTTTTTTGAGAAAAAGATGGAAGGAGTGTTACTTTTCAGAACGGGACATAATAAAAAAAAGTTTTATAAGAACCACTTGGTACTTTTCTGAGTATTATAGAAGAACAACTTCACTGAACAAAAACTATGTAGCCATGCACCTCTTGGCTCTTGCAACGAAATTTACATGACCGTACTTATTACTAGTATAGACTATAGAGCTATGATTTTATCCGGAAATTTGAGATTACAGTTTGAATGTTCGTGTGATGAGATCAGACTCTTGAGTGATCCAAAGAAGTTATTGAGTCCAGCATCAGTGATGCTCTGTCTCAGCTTTCGA…
82	Chr01	2988901	2910927	A	ACGAAATTCAATAACGTTAGAACATCTCAAGAACA	34	ATAGCATCAAGAAACCGTGGGGATGACTACACAAAAAGAATGAAGAGTTGCCTCTAATTTTCTGTTCCAAATTTTTTAACAAGGTGAAGAAAAGCTCATAGAATCTTAGGACTGAGGAACTTGTCACTTAGAACCTAAAAAGGTCTGTCATCGGTTCTATAGGTAATAACTTTGTATTAACTTATCACATGCCCAAATCAACAAATGAGGTTAGAGTGAGATACTTTCACCGAACCAATCTAGAATCTACAAAGCAAGTTACGCTTGTCGGTAGTATCTTTTGACTCAAATGAACAACTCAGAAATTCTGCCTTGAAAGACTGGAGTACAACTTAGACCCAATTTGCAACATGCTTACCTCCCATATCTGCCGAAAAGGTCTTCAAGGTCCCGGGTCCG…	ATAGCATCAAGAAACCGTGGGGATGACTACACAAAAAGAATGAAGAGTTGCCTCTAATTTTCTGTTCCAAATTTTTTAACAAGGTGAAGAAAAGCTCATAGAATCTGAGGACTGAGGACCTTGTCACTTAGAACCTAAAAAGGTCTGTCATCGGTTCTATAGGTAATAACTTTGTATTAACTTATCACATGCCCAAATCAACAAATGAGGTTAGAGTGAGATACTTTCACCGAACCAATCTAGAATCTACAAAGCAAGTTACGCTTGTCGGTAGTATCTTTTGACTCAAATAAACAATTCAGAAATTCTGCCTTGAAAGACTGGAGTACAACTTAGACCCAATTTGCAACATGCTTACCTCCCATATCTGCCGAAAAGGTCTTCAAGGTCCCGGGTCCG…
83	Chr01	2998100	2911622	ACGGGCTAGCCCAGGTACGATGCCGCAAGGCCCACG	A	35	CAGGGCTTCGCCCCTTCTTCTCTTCTCCTCTCCTCTCTTCTTTTTTTTTTCACTGGAATTGAGGAGAGAAGAATGAGGGCAGGGGCTGGGCAGCAGGCCTTTTATAGGCAGCGAGGCCTGCCGCCCGGCCAGAGGGCGGCAAGGGGCCGCCTGCAAAATAGCCGGCCCCGACTGGCTTTTTTGCATTCGGGCCCCTTGCCGCCCCACCAGGGTTTTCCTGCAAAAAACCCTCCCTCCGTCACCACCCGTTCCTCCCCCGTTTGCCACGTCAGCTTGCCGCCCCAGAGGTGGGCGGCAGGGGCTATTTCTGCAATTTTTTTGGTCGATAGATTATTTCTGTAAATATTTAAAAAAAATCTAAATCCGAAAAAAATTCTGCTACTGCGTCAGAACACGGCA…	GTTAAGGCGAAGAGAAAAGCTGTGGGTAGAGAGGAACGAGAAAGAGGATAAGCGTACGTGTGCTCACCGGCGAGGGTGCGGCGGGAGAAGCAGCACACCGGCGACGGCGCCGCTGCTCGCGGGTGGAGATCGCCTCTGCTCGGCGGCGGCGGCGGCGGCGGCCCAGGAGACGAGGAGTCGAGACCGAAGCGACGGGGAGATCGACTAGGGTAAAGATAGGGGAGCAAGGAGACCGAGGTCAATTAATTACGCTGGGCTGTTGGCTATATATGGGCTTTCTATGGGCCGATATTTCTAATCACAGTAGTACTCGTTCCGGACTAGTCATATTGATTTGGAGGCCCATCTAAGACGAAAGGCCCATTAGCAATTACTCTGCTACTGCGTCAGAACACGGCA…
85	Chr01	3008263	39081264	CTCGGCTCCCAGAGCCATTCCACTTGATTAA	C	30	ACGGTGACAAATATGAATCATAGCAATCCTTAAAATATATAGAGGACTTATTTACCTTAACTTAGGTTGCAGCTCGGACAGCCCGAGAATACAACCGACGACGCGGACGAGAAAACACCAACAGCAGCAGCAGCAGCGGAACCAACGGTCTAACACCCAACACCACAGGCGACGGCTGGGGACCAGGACGAAACCCTAATCTTCACTTCACTTCATCTTCAACTTCAGGGCGGAGAAACTATATATATATTTATATAGAGCAAGGGTGAGTACTTCCGTACTCAGCAAGTCACGGGAACTTAGGTGTTTAATGCAAGCTTGTAAGAGAGGCAAGGTTGTTTTGCAAATCTTTTATTTGAAGACATTTTGAAATCACTAAGTGATTTATTTCTTTCTAAG…	CGGCGACAAATATGAATCATAGCAATCCTTAAAATAAATAGAGGACTTATTTACCTTAACTTAGGTTACAGCTCAGACAGCCCGAGAATACAACCGACGACGCGGACGAGGAAACACCAACAGCAGCAGCAGCAGCGGAACCAACGGTCTAACACCCAACACCACAGGCGACGGCTGGGAACCAGGACGAAACCCAAATCTTCACTTCACTTTATCTTCCCTTCAGGGCGGAGGAACTATATATATATATTTATATAGAGCAAGGGTGAGTACTTTCGTACTCAGCAAGTCACGGGAACTTAGGTGTTTAATGCAAGCTTGGAAGAGAGGCAAGGTTGTTTTGCAAATCTTTTGTTTGAAATCATTTTGAAATCACTAAGTGATTTATTTCTTTCTAAG…
86	Chr01	3027971	2931295	GACGAGGCGCGCCAGGTGCACCATGTCGTTGCTCTGG	G	36	GGTGGCGCTCATGCGCGTCAGCTCTGGGATGGAAGACGTCAAGCTGATCGAAGTCGCCCTCGCGAAGTTCCAGAAGCGCTCTGCTATGATGGGCAGAATCCTTGACGGGACACCGGCGGCCATTGCCGAGCAAGAGCTCGATGATCCTGCACCGGTAGGAGAACGCCCCACCGTGAGCCTTGAGAAAGCGTACCGCGAGATCTCGTACAGCGCCGCTCGCCACGCCATGGCCCGCGGCGTCTTCTTCCTCTGCGCCGTCCACCACCGCACGCAAGACGAGCCGCCATTCCTGCACTGGGACGCGCGGCATCAGGTCGCCATCGGACACTTCGAGCGGGCGATGCAAAGTATTACGGATGCCATGGGGCATTACGCGGCTGCCAAGGACGTCGTCATCGT…	GGTGGCGCTCATGCGCGTCAGCTCTGGGATGGAAGACGTCAAGCTGATCGAAGTCGCCCTCGCGAAGTTCCAGAAGCGCGCTGCTATGATGGGCAGAATCCTTGACGGGACACCGGCGGCCATTGCCGAGCAAGAGCTCGATGATCATGCACCGGTAGGAGAACGCCCCACCGTGAGCCTTGAGAAAGCGTACCGCGAGATCTCGTACAGCGCCGCTCGCCACGCCATGGCCCGCGGCGTCTTCTTCCTCTGCGCCGTCCACCACCGCACGCAAGACGAGCCGCCATTCCTGCACTGGGACGCGCGGCATCAGGTCGCCATCGGACACTTCGAGCGGGCGATGCAAAGTATTACGGATGCCATGGGGCATTACGCGGCTGCCAAGGACGTCGTCATCGT…
87	Chr01	3220680	3099291	GATCTTATTATTATTATTATTATTATTATTA	G	30	TGGCTTTCGCCTTTTCTTTGTCTCTAGGGGCTGTATTTTTCTCCTTCTATATTTAATAAAAAAGCACACTCTCGTGCTAGTTCCATTCAAAAAAAAAGAGAGAGTGCATGCCCTCTCAATAGTTCTGTTCAGTGTAAACCCCATTGAACTGTCGATATTTTCCCGACAAGTGACAACCTACTGCAAAGTGCAGAGACATTTGCCATGCAATTTGGTTTGTAGCATTCTCATCAAAGTTTCTGAGAATTGAGACATCAAGATGTTCGGCAAATGGGTTTGGGAACTAATCTTCCATGCACGAAAAACGAAGTGACAGATTAGAGTATTATTAATTACCCCTCCGTCCCAAAATATAAGAATTTTTGGACTCTGACACGGTCTCTGATATGCTACTTTGAC…	GCAGAGTTTGGCTTTCGCCTTTTCTTTGTCTCTAGGGGCTGTATTTTTCTCCTTCTATATTTAATAAAAAAGCACACTCTCGTGCTAGTTCCATTCAAAAAAAGAGAGAGTGCATGCCCTCTCAATAGTTCTGTTCAGTGTAAACCCCATTGAACTGTCGATATTTTCCCGACAAGTGACAACCTACTGCAAAGTGCAGAGACATTTGCCATGCAATTTGGTTTGTAGCATTCTCGTCAAAGTTTCTGAGAATTGAGACATCAAGATGTTCGGCAAATGGGTTTGGGAACTAATCTTCCATGCACGAAAAACGAAGTGACAGATTAGAGCATTATTAATTACCCCCTTCGTCCCAAAATATAAGAATTTTTGGACTCTGACACGGTCTCCGATATGCTA…
88	Chr01	3289434	3153374	TATATATATATATATATATATATATATATATATATATATATATAT	T	44	GTTTTGTTTTGAAGCTTTGGCTATGTCGAAACGAAGAGGCGTGTGGGTTATATACTGCATGCCATGTACTAACGTGCGGACATGTAGATGGAAATTAACTGTCTTGATTTTGGATGAAGATCACATTTTATTTTTTGTTATTCGATTCTGACAATATATAATGATTAGCCCGCGAAAGAAATGCTAGCATGTAATCATTGATCTGTAAGGCAATTTGAATAGAAGAAATCGCATGCTCATGATCTGCCTGGTGATTAGTTAAGAGTTCGTAGTATTCAGGAGGAAGATACGCAGGTTTGTCGGAACGTGCAGCCCTTAACGGCACTGAAATACCAGGTTCTCCACCCTGGCAGATGATTTTTGCCGATAGAGCTACAATATTTATGTCAGTACTCTGAA…	GAAACGAAGATGGCTGTGTCGAAACGAAGAGGCGTGTGGGTATACTGCATGCCATGTACTAACGTGCGGACATGTAGATGGAAATTAGCTGTCTTGATTTTGGATGAAGATCACATTTTATTTTTTGTTATTCGATTCTGACAATATATAATGATTAGCCCGCGAAAGAAATGCTAGCATGTAATCATTGATCTGTAAGGCAATTTGAATAGAAGAAATCGCATGCTCATGATCTGCCTGGTGATTAGTTAAGAGTTCGTAGTATTCAGGAGGAAGATATGCAGATTTGTCGGAACGTGCAGCCCGTATCTGTCCTTAACGGCACTGAAATACCAGGTTCTCCACCCTGGCAGATGATTTTTGCCGATAGAGCTACAATATTTATGTCAGTACTCTGAA…
89	Chr01	3290387	3154308	TCTCGGGCCACAACACTGTTGGGCCACGCGCTCTTCATGGGCCGGACGCGCAATAG	T	55	GCGCCACCCAAACGTGAACTGCAGGTACGCCGCGAGCAGCAGCCATGCCACAGCGCGCACCGCCCCGACAACGGCCTCTAGTGGTATGTTCCCGGTGGCGAGGAACACCGCGATGTCGCTGAGCTCAACATGGAGGTACGAGAATGAGCCACCGGCGGATGGGATCTCCGTGGTGAGCGGAGGACCGAGGGCACCAGATCCAACGCCCCCGTTGAGCTCAGACCATGGAGAGAGGGGCATGCGACGATGGTGGGGGAGGGGGAGCAGCGGAGAGAAGGCAACAGAGGAGGAGCGGCATCGCCAGTCATGAGAGTGGAGGGGAGGGGGAGAGGCGCCGCCGGGAGGGAGGGGGAGGTGGAGCTCGTGGTGGGGGGTGGGAGGGGAAAGTGTGATTAGGGT…	ACCCAAACGTGAATTGCAGGTACGCCGCGAGCAGCAGCCATGCCACTGTGCGCACCGCCCCGACAACGGTCTCCAGCGGTATGTTCCCGGCGGCGAGGAACACCGCGATGTCGCTGAGTTCAACATGGAGGTACGAGAATGAGCCACCGGCGGAGGGGATCCCCATGGCGAGCGGAGGACCAAGGGCACCAGATCCAATGCCCCCGCTGAGCTCGGACCATGGAGAGAGGGGCAGGCGACGACGGTGGGGGAGGGGGAGGGGGAGCAGCGGAGAGAGAGCAACAGAGGAGGAGCGGCACCGCTAGTCATGAGAGTGGAGGGGAGGGGGAGAGACGCCGCCGGGAGGGAGGGGGAGGAGGAGCTCGCAGTGGGGGTGGGAGGGGAAAGTGTGATTAGGGT…
90	Chr01	3340000	3205152	TCTCTTGCTTATAGTTTTTATTTGAGTTGGAGGTCATCCTTCTCCGA	T	46	TTTATTAAGGTGGTCTGCTGAGGTTGGGGCATCAAGAAGTGGATCTCCTGAGCTGCATGTTATGTTGGCGGAATACATATATTCTGAATCTCCAGAAACGGTACTGTTTATAAATTATAGAACTATTTTTCTGACATGAATATATTGTGTTTGTTTTAGAGCTGAAATTTTATGTCTTTTCAACTGTTACTCTTTAATGCCTTTGTGGTTTGCTAAGGTTCGTGTTGACTGCCGTTGGATGCAGGACATGACTAAAGTGTCAAGTCATTTTGTGAGGGGAAATGATCCTAAAAAGTTTGCCTCTATGCTGGCGAACTTTATGGGAAAGGTAATGGTTTTTAGAAAATAATTGATAATAGACTTGCAGCTGATGATTGTCTAATGCCAAATTCTATTGAA…	TTTATTAAGGTGGTCTGCTGAGGTTGGGGCATCAAGAAGTGGATCTCCTGAGCTGCATGTTATGTTGGCGGAATACATATATTCTGAATCTCCAGAAACGGTACTGTTTATAAATTATAGAACTATTTTTCTGACATGAATATATTGTGTTTGTTTTAGAGCTGAAACTTTATGTCTTTTCAACTGTTACTCTTTAATGCCTTTGTGGTTTGCTAAGGTTCGTGTTGACTGCCGTTGGATGCAGGACATGACTAAAGTGTCAAGTCATTTTGTGAGGGGAAATGATCCTAAAAAGTTTGCCTCTATGCTGGCGAACTTTATGGGAAAGGTAATGGTTTTTAGAAAATAATTGATAATAGACTTGCAGATGATGATTGTCTAATGCCAAATTCTATTGAA…
91	Chr01	3394190	3260699	TATATATATATATATATATATATATATATATATATATATATATATATATATATA	T	53	ATCACATAACTCTGGCTTCATGACATATACAAGTCTCCAGCGGAGTGTGTTCTCGACGTATCAGCACAGTTAGTCTATCCTTACTTCTTTTTGGAAAAATCTTATTCTTTAATTGTTTGATTTGATATTCATGCTTCCAAATAACTGTCTATGAAACATGTCTATAGAAATCGAATGGATTGCAAAAATTAAGTTCCTCCGCTTTCTTTTTTTTTTTCTGTTTAGTTTATCTTTACAATGTCAGAGGAATTTGATTATTAAAGAATGTAAGACCAGGCATGGAAATATGCGTGTATTCGGTAAAAAAACAATGATCACTAGCATCATTTTCCATTACATTACAAGATATTGTGCCTAAGATTCAGCGCTGTGGGTCTTGCTACCTGAGTGGCAGTGCAC…	TATCACATAACTCTGGCTTCATGACATATACAAGTCTCCAGCGGAGTGTGTTCTCGACATATCAGCACAGTTAGTCTATCCTTACTTCTTTTTGGAAAAATCTTATTCTTTAATTGTTTGATTTGATATTCATGCTTCCAAATAACTGTCTATGAAACATGTCTATAGAAATCGAATGGATTGCAAAAATTAAGTTCCTCCGCTTTCTTTTTTTTTTCTGTTTAGTTTATCTTTACAATGTCAGAGGAATTTGATTATTAAAGAATGTAAGACCAGGCATGGAAATATGCGTGTATTCGGTAAAAAAACAATGATCACTAGCATCATTTTCCATTACATTACAAGATATTGTGCCTAAGATTCAGCGCTGTGGGTCTTGCTACCTGAGTGGCAGTGCAC…
92	Chr01	3505925	3373048	CACCTCGCGCGCTCGGCCCGATCCCGCCCTGATTCTTCTGG	C	40	ATATTTTTATAATAAATTAATATTGGGTAAAAATATTACTTATTTTTTTATAAATTTAGTCAAATTTAAAGTAATTAAACTTTGATCAAAGTTAAAACATATTATAACCTGAAACGGAGGGAGTAACAATCTCCGTAATGACGAGGAAACGATAAAAACGGTAACAAAAAACATAAACAACATATAACTATTAGCACTACAATATATACTGTCATAACAAACCAAAAAAAGAAGAAAACATTTGTGCCTTCCTTGCCGACTGCCCGACTCCCCCGTCCGAAGCCCGACTCCGACCCATCCCGTCGTCCTCGTCGTCGTCCTCCTCCTTTGCTTGCTTTGCCTGCCTCGCTTCGCTCGCATCACGTGGCTCCGCCTCCTCGTCTCCCTCCCCCCGCACGC…	TATTTTTATAATAAATTAATATTGGGTAAAAATATTACTTATTTTTTTATAAATTTAGTCAAATTTAAAAGTAATTAAACTTTGATCAAAATTAAAACATATTATAACCTGAAACGGAGGGAGTAACAATCTCCGTAATGACGAGGAAACGATAAAAACGGTAACAAAAAACATAAACAACATATAACTATTAGTACTACAATATATACTGTTATAACAAACCAAAAAAAGAAGAAAACATTTGTGCCTTCCTTGCCGACTGCCCGACTCCCCCGTCCGAAGCCCGACTCCGACCCATCCCGTCGTCCTCGTCGTCGTCCTCCTCCTTTGCTTGCCTTGCCTGCCTCGCTTCGCTCGCATCACGTGGCTCCGCCTCCTCGTCTCCCTCCCCCCGCACGC…
93	Chr01	3530682	3404617	G	GTGTATATATATATATATATATATATATATATATATATATATATATATA	48	AGACATCGTCACAAAGAATTAATAGCCTCTCCGGCAAGGATCTGATCACCAAACTCTTGCCGACGGTCAGGAGCTAGCTAGTATATGGATCCAGTCCGGCACCCCCGGTGGCAGTAATGTCCCTGAAACAGCATATAACTATTACAAGACACATACAAACAAGTCATTGTATGAGGTTGAGATATGATTAACATATTGAAGGAAAGAATGATTCTCTCAATAGTTTTTAAGTTTGTGGATATACTACTATATAACAAGTGTACATAATTTTTCTCTCTTTCTTTTTTCACCAAGGTTTTGTCCTAGTACGTACTTCGGTATCGCAATTTAATGCCACTACAAAATGATTATACTCTCTGTAGACACACACAACAAACCTCAACAAAAACATATGCTGCA…	TCGTCACAAAGAATTAATAGCCTCTCCGGCAAGGATCTGATCACCAAACTCTTGCCGACGGTCAGGAGCTAGCTAGTATATGGATCCAGTCCGGCACCCCCGGTGGCAGTAATGTCCCTGAAACAGCATATAACTATTACAAGACACATACAAACAAGTCATTGTATGAGGTTGAGATATGATTAACATATTGAAGGAAAGAATGATTCTCTCAATAGTTTTTAAGTTTTTGGATATACTACTATATAACAAGTGTACATAATTTTTCTCTCTTTCTTTTTTCACCAAGGTTTTGTCCTAGTACGAGAAATACTTCGGTATCGCAATTTAATGCCACTACAAAATGATTATACTCTCTGTAGACACACACAACAAACCTCAACAAAAACATATGCTGCA…
94	Chr01	3553604	3427558	C	CTCTCTCTCTCTCTCTCTCTATATATATATATATA	34	GATGTAGAGGCAACAAAATATGAAAAAGCAAGGCCCAGTATTGAATGATGGAGTGAGAGTTGAAGAATATTATGGTGTTGCAAAAAAGACATGGGGGGAGAGAGAGAGAGAGCGAGGGAGAAAGTAAACAGATAAATAAGGACAAATCGGGATTAATGGCAGTACAAGAAAAAGTGTGAGGGTGACATTGCCACTACTCGTAAGAATATCTACCACAGTGCCTTCCTCATCTCATCATCATTCGCAAATAGTTCCAGCTGCCTGCGAGCGTACGCGTGCTCATAGAGTTCATGTATACAAATACAAGGTATAAACTATATTAAAAAAACATCGCTCTATGCAACCAACATACACCTAACTAACTGCATATTGACCAACGTACGTAGTATATACTCACGG…	GATGTAGAGGCAACAAAATATGAAAAAGCAAGGCCCAGTATTGAATGATGGAGTGAGAGTTGAAGAATATTATGGTGTTGCAAAAAAGACATGGGGGGAGAGAGAGAGAGAGCGAGGGAGAAAGTAAACAGATAAATAAGGACAAATCGGGATTAATGGCAGTACAAGAAAAAGTGTGAGGGTGACATTGCCACTACTCGTAAGAATATCTACCACAGTGCCTTCCTCATCTCATCACCATTCGCAAATAGTTCCAGCTGCCTGCGAGCGTACGCGTGCTCATAGAGTTCATGTATACAAATACAAGGTATAAACTATATTAAAAAAACATCGCTCTATGCAACCAACATACACCTAACTAACTGCATATTGACCAACGTACGTAGTATATACTCACGG…
95	Chr01	3554837	3428829	T	TATATGTTTTTCTATAAACTTTGATAAAGATATAGAA	36	GGCAATCATTAGAGAGGAACCCATCAGATACAAGTTATCGGCATGCATGCATTGTCATGTTCCACACTTACCTAGCGAATTAAGTGATATTCTTAATCAGGTCTAGCTAGATAGAGAGTAGATATGTTCTCTCTCGCTAATGATTAATTCTGGACCCAAGCTGCATGATCAATAACACTGTACAGTGTGTAATATCACTCATGTTTTCCACATAGAAATCACACTTCTAAACAGTAGAGGAAACATTGCAGTCTGAGCTTAATACTGTACAAAATTAACTCAAAAGGGTAAACGTACGTGTACAGAGCATTTCGACCATACAAATTAATCACTCGTGTTCAGCACTATTTGATGTCAATATATAGTGTGTTCTCATATTAATTTCTAAGTTAACTTTAA…	GGCAATCATTAGAGAGGAACCCATCAGATACAAGTTATCGGCATGCATGCATTGTCATGTTCCACACTTACCTAGCGAATTAAGTGATATTCTTAATCAGGTCTAGCTAGATAGAGAGTAGATATGTTCTCTCTCGCTAATGATTAATTCTGGACCCAAGCTGCATGATCAATAACACTGTACAGTGTGTAATATCACTCATGTTTTCCACATAGAAATCACACTTCTAAACAGTAGAGGAAACATTGCAGTCTGAGCTTAATACTGTACAAAATTAACTCAAAAGGGTAAACGTACGTGTACAGAGCATTTCGACCATACAAATTAATCACTCGTGTTCAGCACTATTTGATGTCAATATATAGTGTGTTCTCATATTAATTTCTAAGTTAACTTTAA…
96	Chr01	3564718	3438748	C	CCGTCCCAAAATATAGCAATTTTCAGCTATGAATCTAGACA	40	TAGCTGAACTAATGAAGTCGTCAAAGTGTGAAGAATTTCTTCAACTGATGCACGCTCAGTAAGTTGTGTAGTCGCTTCTAATTCTGAATCAGCTGCATTATCTGCTCTGGCTAAAAGAGCTTGGCAACAATAACCCAATCCGAGTCCACAAGCTCCTTTTACAAGGTAGCTTTCAGTTTTTGAGATTACCTGAATGCAAAAAAAATGGCATTATATGAGAAACTATTCATGCATAATTGAAAGGTATCCTTGTTATATCCGATGATGTGAAAAATGATCTGCCAGCAACTGTAGCAAGTGGCATCATGAACGTCTTGAATTCAAAGGATTGGTCCAGTTGTACCCATCTTATCATAAATATTTGTTACTGCAGCATGAAGCAACACATCACAAGCTTAT…	TAGCTGAACTAATGAAGTCGTCAAAGTGTGAAGAATTTCTTCAACTGATGCACGCTCAGTAAGTTGTGTAGTCGCTTCTAATTCTGAATCAGCTGCATTATCTGCTCTGGCTAAAAGAGCTTGGCAACAATAACCCAATCCGAGTCCACAAGCTCCTTTTACAAGGTAGCTTTCAGTTTTTGAGATTACCTGAATGCAAAAAAAATGGCATTATATGAGAAACTATTCATGCATAATTGAAAGGTATCCTTGTTATATCCGATGATGTGAAAAATGATCTGCCAGCAACTGTAGCAAGTGGCATCATGAACGTCTTGAATTCAAAGGATTGGTCCAGTTGTACCCATCTTATCATAAATATTTGTTACTGCAGCATGAAGCAACACATCACAAGCTTAT…
97	Chr01	3575885	3449972	ACCGCCCATTTCAAGGAGGAGCTGCTCCCGTGCTTGTCGCCCGAGGT	A	46	CGCCGCAGTAGCAAGGATTTGGCTTCAGCGGGTCCGGGACTGGAGCGGTGCTAGTGCCACGGGGAGATAGGGATGGTGGCGCCCCGGCGAGAACGTTGCCGCCCCGGCGGCCACCGAGCCTCCTGCTCCTGCCGCCAACTTCCCGAGTCTCTGCGAGGTCGCCGCGAGCGCGGCCGGCGGCAAGTCCAAGAGGAAAAGGGGGCGGTCTCGCGGCGGACGTGGTCGGGGAGGGGGCCCGTGTCGGAGGAGGAGGAGGAGCTCCAGTCGCTGCTCCGCATCATGGCCTGGTCGACGCCGGAGCGCTCGGCCAGTCCGCCGCCGCGCGTTGGGGCGCGCAAGCTATTGCTCCCTTTCCACCGCGGGCACCGCCCACCTTGCCGTCGACGCTGCGGCCGCCGC…	CGCCGCAGTAGCAAGGATTTGGCTTCAGCGGGTCCAGGACTGGAGCGGTGCTAGTGCCACGGAGAGATGGGGATGGTGGCACCCCGGCGAGAACGTTGCCGCCCCGGCGGCCACCGAGCCTCCTGCTCCTGCCGCCAACTTCCCGAGTCTCTGTGAGGTCGCCGCGGGCGCGGCCGGCGGCAAGTCCAAGAGGAAAAAGGGGCGGTCTCGCGGCGGACGTGGTCGGGGAGGGGGCCCGTGTCGGAGGAGGAGGAGGAGCTCCAGTCGCTGCTCCGCATCATGGCCAGGTCGACGCCGGAGCGCTCGGCCAGTCCGCCGCCGCGCGTTGGGGTGCGCAAGCTATTGCTCCCTTTCCACCGCGGCCACCGCCCACCTTGCCGTCGACGCTGCGGCCGCCGC…
98	Chr01	3603683	3480685	TAAACTTTCAACTTTTTTTTCAAACTTCTAACTTTTCCC	T	38	GCTACAGTAGGGCCCATAACCAGCTACAGTACGGATTTCAATACGTTATATGCCTATAAGAGATGAAACCATATATTATATGATGTACTCTCTCCATCCCGTCGTTGACTTTTTTAAACGTGTTTGATCTTCGCCTTATTCAAAAACTTTTATAAATATTATTAAAAACTTGAGTAGTAGTATATTTAACAATGAATCAAATTATATGAAAACAATTAATAATTACTTAATTTTTTTAATAAGATGAATGATCAAACATATTTAAAAAAGTCAACGGCGCTAAATATTTAGGGACGGAGGGAGTACTAAATGTTTATATGTAACTACTATATGAATAAGCTATTAGATTGACTATAAATAATTTGGAGTTAGTAGTTGGCTATACTTGCTCTAACCTGA…	AGCCGAACAGGCCCATAGCCAGCTACAGTACGGATTTCAATACGTTATATGCCTATAAGAGGTGAAACCATATATTATATGATGTACTCCCTCCATCTTGTCGTTGACTTTTTTAAACGTGTTTGATCTTCGCTTTATTCAAAAACTTTTATAAATATTATTAAAAACTTGAGTAGTAGTATATTTAACAATGAATCAAATTATATGAAAACAATTAATAATTACTTAATTTTTTTTAATAAGATGAATGGTCAAACATATTTAAAAAAGTCAACGGCGCTAAATATTTAGGGACGGAGGGAGTACTAAATGTTTATATGTAACTACTATATGAATAAGCTATTAGATTGACTATAAATAATTTGGAGTTAGTAGTTGGCTATACTTGCTCTAACCTGA…
99	Chr01	3636491	3509634	A	ACTCCGTCACATCGTTCCAATTTCAACCAAACTTTCAATTTTGACGTGAACTAAA	54	TGCATGTATATGTGAAAGCTAGCTAGCTGCAGCTGGACTACGTGTCCTAGTAGTAGCTACTATCAACTCATCACTCTCTGAATTCGATCGAGAGAAAAAAGGGGACACTCCGGCCAGTCCACTGAATGCTACTTCACCAGCTAAGCCAAAACTCCTTAAATAGTTCCACGCCAAAATTAGAAGTTTGAAGAAAAAAATTTGGGTCGAATTTAGGCCCTGTTTAGTTCACACCAAACTTCCCCCCAACTCCTAACTTTCCATCACATCATATCACATCCAAAACTTTCCTACACACATAAACTCTCAACTTTTTTTCCAAACTACCAACTTTTCCCAAACTTCTCCCCAATTTCAAGAACTAAACATAGCCTTAGTTTCAAACTTTTTCTTCAAATTTCC…	TGCATGTATATGTGAAAGCTAGCTAGCTGCAGCTGGACTACGTGTCCTAGTAGTAGCTACTATCAACTCATCACTCTCTGAATTCGATCGAGAGAAAAAAGGACACACTCCGGCCAGTCCACTGAATGCTACTTCACCAGCTAAGCCAAAACTCCTTAAATAGTTCCACGCCAAAATTAGAAGTTTGAAGAAAAAAGTTTGGGTCGAATTTAGGCCCTGTTTAGTTCACACCAAACTTCCCCCCAACTCCCAACTTTCCATCAAATCATATCACATCCAAAACTTTCCTACACATATAAACTCCCAACTTTTTTTCCAAACTACCAACTTTCACCAAACTTCTCCCCAATTTCAAGAACTAAACATAGCCTTAGTTTCAAACTTTTTCTTCAAATTTCC…
100	Chr01	3746856	3618878	T	TGACCGAGCCACCTATAAGTGATTCGTGTGC	30	TCTCTTAATTAGTGACTGAAGCTAATTCGTATCCTGAATCGCAATGCCAGATAAATGGATCACACGCTATTTTTTTTTTTGTGTGAATGATTAAATGGATCCCGCATATTTTTTAAATTTCAATGCCACATAAGCGTCAAGTCAACACCACGTGGGACGAAGACTAGGTTAACACCACCACGTAGCGCCACGTTAGCGAAACCACACTCCAAAAACGTTGAGGGAGTTAAATTGCACCAGTTTTCGTGGTTGGGGGGTCGAGGTATCCGGTATTGCGGTTCAGATATATGAATCTGATTGAAGCTATAGTTGAGGGAGCAAAAGTGAACTTATCCTGGTGACAATGATCGGCCCATGTATAGATACGGAGCTTTTTGCGGTTAGAGGCCCACCCAATGT…	AGACTCTCTTAATTAGTGACTGAAGCTAATTCGTATCCTGAACCGCAATGCCAGATAAATGGATCACACGCTATTTTTTTTGTGTGAATGATTAAATGGATCCCGCATATTTTTTAAATTTCAATGCCACATAAGCATCAAGTCAACACCACGTGGGACAAAGACTAGGTTAACACCACCACGTAGCGCCACGTTAGCGAAACCACACTCAAAAACATTGAGGGAGTCAAATTGCACCAGTTTTCGTGGTTGGGGGGTCGAGGTATCCGGTATTGCGGTTCAGATATATGAATCTGATTGAAGCTATAGTTGAGGGAGCCAAAGTGAACTTATCCTGGTGACAATGATCGGCCCATGTATAGATACGGAGCTTTTTGCGGTTAGAGGCCCACCCAATGT…
101	Chr01	3769535	3639341	GAGTTAGCATATGTGAGTGTTAGAAATTATTAGATTATTAG	G	40	ACGAACGCGAACGAAACGTTAAAGAAACGTGAACGAACGCGAACGAACGTGAACGAACGCGAACGAACGTGAACGAACGCGAACGAACGTGAACGAACGCGAACGAACGTGAGTGTTAGTGAACGAACGCGAACGAACGTGAATGAAATGCGAACGAACGTGATTGAAACGTTAACGAACGTGAATGCACTTGAACTAAAAGTGTGAGAACGAACGCGAGCGAAACGTGTACGAACGAGATAATTAAACTATTGTTGAACTTAGCATATATATATGATTATATATACTTGAAAACGTGAAATACATTATATGTTCCTTTGCATTTAGACTAATACATTTTTTTGCATGTTGCAGAGAAGACGTCGTCGTCGTCGTCCCTCAAGCCGAAGTGGTAGCTAG…	ACGCTTAACGAACGCGAACGAACGTGAACGAAACGTTAAAGAAACATGAACGAACGCGGACGAACGTGAACGAACGCGAACGAACGTGACTGAAACGTGAACGAACATGAGTGTTAGTGAACGAACGCGAACGAACGTGAATGAAATGCGAACGAACGTGATTGAAACGTTAACGAACGTGAATGCACTTGAACTAAAAGTGTGAGAACGAACGCGAGCGAAACGTGTACGAACGAGATAATTAAACTATTGTTGAACTTAGCATATATATATATGATTATATATACTTGAAAACGTGAAATACATTATATGTTCCTTTGCATTTAGACTAATACATTTTTTTGCATGTTGCAGAGAAGACGTCGTCGTCGACGTCCCTCAAGCCGAAGTGGTAGCTAG…
102	Chr01	3772030	3653306	TCTGCCACCTCCTCCTGCACCATCTCCTCCAGCTCCT	T	36	AACGGACACCATGTGAGCTGCATATTCCCTTCAAGAACTTATCAATCAAGGTATGCTCGATGTAATATATGATTTTTGACTCGTACGTTCCGCAAGTTGCTGCTTAGGTTGATTACTAATAGATAACCTCTCATCACGTGAAGGTGGCGTAGGGAATGGCCATCCCAACGGACATTTCAGGGACTTACCACTGCAGGCCGATTCCAGCAGGATACTCGAGGGTCGAAGTTGAGCTGGTGGAAGCCGTGTACGAGGACATCGAGTTGGACTACCCAGGAGGAGACGGTGAGACGCATCTACGAGACACAAGCCACGCCATTATATTATGGCGCAAGCGGTACATCATCGTCCCTGGGCGACAAGCGGCGTCTCGTGCACCATCTCCTCCGGCTCCGCCGT…	AACGGACACCATGTGAGCTGCATATTCCCTTGAAGAACTTATCAATCAAGGTATGCTCGATGTAATATATGATTTTTGACTCGTACGTTCCGCAAGTTGCTGCTTAGGTTGATTACTAATAGATAACCTCTCATCACGTGAAGGTGGCGTAGGGAATGGCCATCCCAACGGACATTTCAGGGACTTACCACTGCAGGCCGATTCCAGCAGGATACTCGAGGGTCGAAGTTGAGCTGGTGGAAGCCGTGTACGAGGACCTCGAGTTGGACTACCCAGGAGGAGACGGTGAGACGCATCTACGAGACACAAGCCACGCCATTATTTTATGGCGCAAGCGGTACATCATCGTCCCTGGGCGACAAGCGGCGTCTCGTGCACCATCTCCTCCGGCTCCGCCGT…
103	Chr01	3777426	3659689	A	ATATATATATATATTATATATATATATATATATATA	35	ATCAACATGGTTCCAACGAGGCATTGTCTAATACTAATAAAAAATATCCCTTGATCCTCTGCCCATGTAAAAAAGTACTTTTCAGAAAACTACAACTTTGGTAACAAAATTATCAGTGCAACAATAGCATGGAAAATTATCACAAAACTGTAATTTTTACGTTATATCTTGCTACAGTTGTCACCTATATATACTGTAGCAGTATATAACGTAAAAATTACAATTTTGTGGTAATTTTACACGCTATTGTTGCAGCAATCTGAAACATGTCGCTAATATTACAGCAAACTGATAGTTTTGTTAGTAAAGTTGTAGTTTTCTAAAATTTACTCTTATTAAAATATAGTAATTTCTCCATCTAATTCTCATCTTAACAGCTCAACTAATTACAATCATATT…	TGATCCTCTGCCCATGTAAAAAAGTACTCAGTAGTACTCCCTTGATTCTCAGTTCTAAAATATTAACTTTTATTAAAAGAGTAAATTTCAGAAAACTGTAACAAAATTATCAGTGCAACAATAGCATGGGAAATTATCACAAAACTGTAACTTTTACGTTATATCTTGCTACAGTTGTCACCTATATATACTGTAGCAGCATATAACGTAAAAATTACAATTTTGTGGTAATTTTACACGCTATTGTTGCAGCAATCTGAAACATGTCGCTAATATTACAGCAAACTGATAGTTTTGTTAGTAAAGTTGCAGTTTTCTAAAATTTACTCTTATTAAAATATAGTAATTTCTCCATCTAATTCTCATCTTAACAGCTCAACTAATTACAATCATATTTTT…
104	Chr01	3781056	3663315	TCAGCTCCCAGTCAGTTTAGCAGATTATATATATTC	T	35	TATATATACAACTTACATACAGAATCAACCTCAAGAGAATGAGATGCAAAGTGATAGTAAAGTAAAAAGAGAGATGAGAAAAAATGACAAGAGTGGGATACCTGATCGATGCATGCATGAGGGCAACTACGACGTTGACATTATAATATAGGAGCGACTTGTATGCCATATTAATTGTCAGATACTCAGATATATATATTCAAGATCCACTATATACTGATAAATAGAGATAATGTGTAGGAGTAGTTGCCCTGCCCTAGAATACATATTCTTGGTTCTGATAGAAGTGGATTAAGCATCTATTGAATGAAGCAACATAGCACATGCATGCTCCCTCAGATCTGGGGATTGATGATGATCATCCTCACAAGATTAATTGAGAACCAAGAGAAACTAATT…	TATATATACAACTTACATACAGAATCAACCTCAAGAGAATGAGATGCAAAGTGATAGTAAAGTAAAAAGAGAGATGAGAAAAAATGACAAGAGTGGGATACCTGATCGATGCATGCATGAGGGCAACTACGACGTTGACATTATAATATAGGAGCGACTTGTATGCCATATTAATTGTCAGATACTCAGATATATATATTCAAGATCCACTATATACTGATAAATAGAGATAATGTGTAGGAGTAGTTGCCCTGCCCTAGAATACATATTCTTGGTTCTGATAGAAGTGGATTAAGCATCTATTGAATGAAGCAACATAGCACATGCATGCTCCCTCAGATCTGGGGATTGATGATGATCATCATCACAAGATTAATTGAGAACCAAGAGAAACTAATT…
105	Chr01	3819733	3702875	GGGTGTCGCGGCGTGGCCGTGGCCGTGTGGGAGAG	G	34	GAGAAGTGCCAAGCACCAGGATGGAGCAATCTAGACAGGATTATCAGGGCGATTAAGGCGAGGGTTCCAGCTGCCCCCCTATTCCCCAAACCCTAGCACGCAACAAGCCAAAACGAGCGGCCTTCTTCTCTCCTCGCTTTCCACACGAATCCCATCCCAGAAGAGGGAAGAGGAAGCCAAAGCCTCTCCTAGATGCTACCACATGGTTCCAGTTCCAAATCCCACCACCCCGCCGACGGCGACATCCACTACGCCACCGACGACGACGATCCCGAGTTCCCCCTCGGCACCACGACCACGCAGCCGCAGGAGCAACCAGTGGCCGGGCCATTTTGCGGCGGCAGAGCACCATGGGTGCGCGCGGATCCGTGTGGCGGGCATGGGGTTCGCATCGCACGC…	ATGGAGCAATCTAGACAGTATTATCAGGGAGATTAAGGCGAGGGTTCCAGCTGCGCTGCCCCCCTATTCCCCAAACCCTAGCACGCAACAAGCCAAAACGAGTGGCCGTCTTCTCTCCTCGCTTTCCACACGAATCCCATCCCAGAAGAGGAGAGAGGAAGCCAAAGCCTCTCCTAGATGCTACTTCATGGTTCCAGTCCCAAACCCTACCACCCCGCCGACGGCGACATCCACTAAGCCGCCGATGACGAAAACGATCCCGAGTTCCCCTCGGCACCACGGCCGCGCAGCCGCAGGCGCAATCAATGGCGGGCCGTAACCCAAGCACTCCGCGCGCCGCGGCGGCAGAGCACCATGGGTGCGCGCGGATCCGTGTGGCGGGCATGGGGTTCGCATCGC…
106	Chr01	3820287	3703388	ATATCGCAGAAGCAAACCACGCAAAAAGATGTGATTCTCAATGAACA	A	46	CTGAAAAATAATTTGCAAATAAAATTTTGATATAGTACGTGTTTTTAACAATCTTAAAGTAAATGGTGAAAAATAAATTTCGCTGAAAAAAAACCTAAAATCAAATTTGGTTGAAAATAAATAATTTAGCTGATAAGTATAAGTAAAAAGATGATGAAGCTGGATAACTGTTTTGCTTTTAGAGTTCTTTTAGCCGTTTGTTTGGTTTAAATTTTAAAAACAAACCCTCTAAAACTTGGTTTTCAAAACTAAACCTTTCTAATCGTCGTGCTACTGTGGTTCTGCGGCAACTAAAATTCCAAACACATGTTTAATTTTCACCTCTCCAGCTCTCCTTGTATGAATTTGCTGTTTCGTCAGGTAAAAACTCGAAATGCAGTGCACAAGGTAGTCTCAAAT…	AACGAGGCTGAAAAATAATTTGCTAATAAAATTTTGATATAGTACGTGTTTTTAACGATCTTAAAGCAAAGATTGAAAAATTAAAAAAAAACCCTAAAATCAAATTTGACTAAAAATTTAAATTTTAGTTTATAAGTATAAGCGAAAAGATGAGGCTCGATAACTGTTTTGCTTTTAGAGTTCTTTTAGCCCTTTGTTTGGTTTAAATTTTAAAAACAAACCCTCTAAAACTTGGTTTTCAAAACTAAACCTTTCTAATCGTCGTGCTACTGTGGTTCTGCGGCAACTAAAATTCCAAACACGTTTAATTTTCACCTCTCCAGCTCTCCTTGTATGAATTTGCTGTTTCGTCAGGTAAAAACTTGAAATGCAGTGCACAAGGTAGTCTCAAATCTGTGA…
107	Chr01	3886464	3774476	G	GTCACTGTTCTACACCCTTTCAAGGATCTTAT	31	TAGGGCTTGGGCTATGCGGCGGTTTTTATCTCTTCAAAACGTGTGTTTTGGAGCAAACTGGCAGGTGAGTGAGTGAGTGGTATGTGTGCACATACGTGTTGTGTGTAATAAAAAAATATATAATTTATTTATGGTTATTTAGATGAGGTTCTACTTCTAATGGCCAAAATATTTTAGTTTTATTCCGTTTCCGTAAGTTGTATAGCTCTATGGTGAAATGGTGACATCATATATTTTTATGTATTGGAGTATTACTGTATTCTTTGTGTAGTCGTACGTGTAAGACTCCTCCATCGTGTTTAAATCATGTGTAATTCCTAATACACATAAATAACCATGAGTTAGCGTAAATTAAGGGTGAGAAATACCCCTTTCTTTCAAAACTGGAAAGTATTTTCC…	TAATTGTAAGAGATTTTATCATATGTATGGTAGTGCTTGGGCTATGCGGCAGCTTTTATCTCTTCAAACGTGTGTTTTGGAGCAAACTGGCGGGTGTGAGTGAGTGGTAAGTGTGCACATACGTGTTGTGTGTAATCATGGTTACTTAGATGAGATTCTCACTTCTAAGGGCCAAAATATTTTAGTTTTATTCCGCTCCCGTAAGTTGTATAGATCTATGGTGAAATGGTGACATCATATATTTTCATGTATTATTAGTACATCTTTTGTATAGTCGTACGTGTAAGACTCCACCATCAGGTTTAAATCATGTGTAATTCCTAATACACATAAATGACCATGAGTTAGCGCAAAGGGTGAGAAATTACCCCCTTTCTTTCAAAACTGGAAAGTATTTTC…
108	Chr01	3942930	3823999	GCTCCTAGGTTAGTATATTCTGAGACGGAGAGAGGATACGTCA	G	42	GAGAATAAAAACAGATGCGTGTTTTTTTTATTTTTTTTTTTGGTTTTTTTCAGGAGCGTGGCAGCAACGGTCGAGAGAGCCGTTGGGAAATTCAAACTCGCGCGCGGTGAGGGACACGTGGGTTGCGGGATGCCGTTGGATTTGGATTGAGCGGCTCGCGATGAGTGGACGTTACGCTGGGTTGGGGTGGACTGTGGAGTGGTTACAGGTGTACAAGGGATTAATAAAGAGATCATTTAGTAATGAGGAGTTAGTAATTAATTGTTGTGGGGGGAGCGGTGGCCCACCGGCGGCCGGCGGGTTTGGGGGCCGTGGGGCTCGCCGTGGATAGGACGGCGGCCAAGGTTGATTTGAATAGACTACCGAGATGTGAGATCTACTACTCTCTTCGTAAAAAAA…	GAATAAAAATAGATGCGTGTTTTTTTATTTTTTTTTTTGGTTTTTTTCAGGAGCGTGGCCGCAACGGTCGAGAGAGCCGTTGGGAAATTCAAACTCGCGCGCGGTGAGGGACACGTGGGTTGCGGGATGCCGTTGGATTTGGATTGAGCGGCTCGCGATGAGTGGACGTTACGCTGGGTGGGGGTGGACTGTGGAGTGGTTACAGGTGTACAAGGGATTAATAAAGAGATCATTTAGTAATGAGGAGTTAGTAATTAATTGTTGTGGGGGGAGCGGTGGCCCACCGGCGGCCGGCGGGTGTGGGGGCCGTGGGGCTCGCCGTGGATAGGACGGCGGCCAAGGTTGATTTGAATAGACTACCGAGATGTGAGATCTACTACTCTCTTCGTAAAAAAAAAA…
111	Chr01	3997559	3879499	C	CTTTTTTTTTTTTGAGAACATTCAAGATGAAC	31	CTGATCCGAGCACGTAGTAGCTGCTGCTGCTGCTGCTGCTGCAACTTTAGACATATTAATGCTGACAATGCTGGGTAACTGAAGCTTTTGTTCGATGTTTTTGGTTTGTCCAACGCTATTAGCATGTGCTTAATTAATCGTGTAGTCAGCCAGTAGGCTACGTGTCCATGTCGTTGGCTCGATCTGCCTGCGTGTGTGTACCAACACTAGGACAAACCAACACTAGGACGATTAATTCTAAGGTGTGTTTTGGTCCTTTTTGAGACAGCTTCCTTTATGAGGTCCATCTGAAGGCTGCCAACTGTAGTCAGCCATTGTTTTTTTTTCTTTTTTTTTTTAAAAAAACTTGTAGTCAGTCGTGATTCGAATTTAAGACCTCTAGGCTTGATATGCATCTGG…	CTGATCAGAGCACGTAGTAGCTGCTGCTGCTGCTGCTGCAACTTTAGACATATTAGTGCTGACAATGCTGGGTAACTGAAGCTTTTGTTCGATGTTTTTGGTTTGTCCAACGCTATTAGCATGTGCTTAATTAATCGTGTAGTCAGCCAGTAGGCTACGTGTCCATGTCGTTGGCTCGATCTGCCTGCGTGTGTGTACCAACACTAGGACAAACCAACACTAGGACGATTAATTCTAAGGTGTGTTTTGGTCCTTTTTGAGACAGCTTCCTTTATGAGGTCCATCTGAAGGCTGCCAACTGTAGTCAGCCATTGTTTTTTTTTTCTTTTTTTTTTAAAAAAAACTTGTAGTCAGTCGTGATTCGAATTTAAGACCTCTAGGCTTGATATGCATCTGGCT…
112	Chr01	4017230	3900141	TGTCAACACTAGGAAACATTAGGACAACATGTTGTGTGAGGGTGGTGGGTGTT	T	52	ATGTCACATGATGTGGGGTAACACCTACCTAAAATTACAGTGCAAAAGCATAGTCAATCGAAAGTATGAACAACCGAGGAGGCGCGTACACGTCAACATAAACATATGCAATGGCGCAGAAGGCAGTTCTTGGCATGTCGGATGTCCACCCAAGCTCTACTGTTACCACTACAATTACCATCGATGCCCGTAAAAACTAGCTGGTTGTCAAAAAATACTATTAACTATCCATGCTCGATAATACCGCTGGCTCCACCATTACACATATGGCATGCATATATTGCCATCTAGCAACGCGATCAAGTAATCCAACCGGTCGGTGCATGCAACTCGATGATAAAATGAAAATGCTTATCACACACATGATGCATGCATGTGTATATATATGGGATTGGCCGC…	ATGTCACATGATGTGGGGTAACACCTACCTAAAATTACAGTGCAAAAGCATAGTCAATCGAAAGTATGAACAACCGAGGAGGCGCGTACACGTCAACATAAACATATGCAATGGCGCAGAAGGCAGTTCTTGGCATGTCGGATGGCCACCCAAGCTCTACTGTTGCCACTACAATTACCATCGATGCCCGTAAAAACTAGCTGGTTGTCAAAAAATACTATTAACTATCCATGCTCGATAATACCGCTGGCTCCGCCATTACACATATAGCATGCATATATTGCCATCTAGCAACGCGATCAAGTAATCCAACCGGTCGGTGCATGCAACTCGATGATAAAATGAAAATGCTTATCACACACATGATGCATGCATGTGTATATATATGGGATTGGCCGC…
113	Chr01	4048859	3931802	GTTGTCTTCGTCGGTGTGTGGTGCTACTGCTGCAGTAGGTTGTCG	G	44	TTTAAAAAAAAACAGGTAACAGCTTGATCCATCGTAAACCCTGAACTCTGAAACTCCACAATTTTTTTTATTTCTTTCTTAGAAGTGAGTGCAATCATGCATTCGTGCGTCTGTCCGTCCGCTGCTCCTGCCTGCCGGCTGCCGCTAGCTACCACTTCGCCGATTTCCCCTTCTGCAGCCACTACCTCCAGGCTCCAGATGCGCGGTTTTCCTCGTCGCACCAACAACCATCACACGTCTTATACTTTTTTTTAATGGAAATCACATGTCTTATACTACATTAACTTAATATATGATAGAGAAAGTAGTAGAAATACATGACATACTCTCTCTATCCCAACATAACAAAAAAAATGTGATATATGTTCAGATTTTTTTTGAAAGGACATATATGTTCAG…	TTTAAAAAAAAACAGGTAACAGCTTGATCCATCGTAAACCCTGAACTCTGAAACTCCACAATTTTTTTTATTTCTTTCTTAGAAGTGAGTGCAATCATGCATTCGTGCGTCTGTCCGTCCGCTGCTCCTGCCTGCCGGCTGCCGCTAGCTACCACTTCGCCGATTTCCCCTTCTGCAGCCACTACCTCCAGGCTCCAGATGCGCGGTTTTCCTCGTCGCACCAACAACCATCACACGTCTTATACTTTTTTTTTAATGGAAATCACATGTCTTATACTATATTAACTTAATATATGATAGAGAAAGTAGTAGAAATACATGACATACTCTCTCTATCCCAACATAACAAAAAAAATGTGATATATGTTCAGATTTTTTTTGAAAGGACATATATGTTCA…
114	Chr01	4115549	3997498	A	ATGATGATTATTGTTATGGGTTTCAAGAATTGGAGCGTTAAAAGT	44	CATTGTTTGACATTTCGTCTCATGCAGTGGAGAGAACATTAATCATTCAGGCTCAAATAATTCAGTGTATGCGTATTGGTGCATGCATATATCCTGTGAAAATTGTCATGGCACTGAGGCTGCTTATTGTTATTCATTCATGCATGTGTTCATTGCTCTGAATCCACAATTAGTAGAGACTGTAGCTGATGGCTCCTGACGATCGTGAGATCACTTTATGCCTTTGCCTACCAATGACTTATATATGTCATGCATGCATGCACATATTGTTGTGTTTATATTTGGATGGATTGCTGCCTAACCCAACTAACTACTTGTTGTGCACAATGAAAAGCAGCCGCTATTTATATAAAAGGCTAAACAAGATTGCCCCTAACACAGGGGCTTGCAATGTCTAAG…	CATTGTTTGACATTTCGTCTCATGCAGTGGAGAGAACATTAATCATTCAGACTCAAATAATTCAGTGTATGCGTATTGGTGCATGCATATATCCTGTGAAAATTGTCATGGCACTGAGGCTGCTTATTGTTATTCATTCATGCATGTGTTCATTGCTCTGAATCCACAATTAGTAGAGACTGTAGCTGATGGCTCCTGACGATCGTGAGATCACTTTATGCCTTTGCCTACCAATGACTTATATATGTCATGCATGCATGCACATATTGTTGTGTTTATATTTGGATGGATTGCTGCCTAACCCAACTAACTACTTGTTGTGTACAATGAAAAGCAGCCGCTATTTATATAAAAGGCTAAACAAGATTGCCCCTAACACAGGGGCTTGCAATGTCTAAG…
115	Chr01	4119296	4001296	GGAATTGTAACCTAGGAAGTTGCCACCGTGTATGGATGATTAGCTAGTA	G	48	TTGCTTTCTCTAGTGTTGTCTCCTGTCTAGTCAGGAACTCACGATGTGGTGTTCTGCAATGGAGCCCAACTAGAGAATTCCCGGTTTTATTCTGGTTTCTTGTTCCTTATTAACATTTCCCACCAAATCACGATCCCCTCCTCCGCCACCGCTTTGCTCCTCCCCCACAGAGACCGAACCAACCGCCACTCTCTGCCCCATCACGCCCACCAAGGCGCCTAGATTCAGATACTGATCCAGCTCCCTTGTGTCCGCCATGACCATGAACCTGATGAGTCCCGTTCTGGTGTCATTCCGTGATCGCACCAATGAGTTCCATGCCGCCGTCGAGAGCGTGGCGCGCTACAGCAGCGTTGGCGGCCCGATTGTATGGCTCTTCACTACCCTCCTGTTGGTCTC…	TTGCTTTCTCTAGTGTTGTCTCCTGTCTAGTCAGGAACTCACGATGTGGTGTTCTGCAATGGAGCCCAACTAGAGAATTCCCGGTTTTATTCTGGTTTCTTGTTCCTTATTAACATTTCCCACCAAATCACGATCCCCTCCTCTGCCACCGCTTTGCTCCTCCCCCACAGAGACCGAACCAACCGCCACTCTCTGCCCCATCACGCCCACCAAGGCGCCTAGATTCAGATACTGATCCAGCTCCCTTGTGTCCGCCATGACCATGAACCTGATGAGTCCCGTTCTGGTGTCATTCCGTGATCGCACCAATGAGTTCCATGCCGCCGTCGAGAGCGTGGCGCGCTACAGCAGCGTTGGCGGCCCGATTGTATGGCTCTTCACTACCCTCCTGTTGGTCTC…
117	Chr01	4193557	4069058	TATATATATATATATATATATATATATATATAT	T	32	AAATTACTCTGCAATTTCTCATTTCATAGAATTTAAAAGGAATGGTAAAAAAAAATCAATCATCTGTTTCAACTTTCCAGAGATCCATATAATTGTTTTCCATAAGCGCTCTAGAATTTCTATGTGTTTTTTTTTTCAAAGGGTGCCCTAAATGCCTGGAAAACAACACGTCCTTTAATTTGCCTAAAGCGAAAAGGCAAAAATGGGGAGCAGAAAAAGAAATCCTTGATTCGCCGAAAGCTACAAAGGGGAAATAGAGAACAGAAAAGAAAAAAAAAAGGGAGAAAGGAGGGAAAATGAAAACGTTTCGGCCACGCGTACGTAGGTATACCCAAGAGATATAGCCAGTGAGCCTTTAGCTGGAGTCCTACACGTATGTATACATCGAATCTCCCTTTC…	AAAATTACTCTGTAATTTCTCATTTCATAGAATTTAAAAGGAATCGGTAAAAAAAATCAATTATTTGTTTCAACTTTTCAGAGATCCATATAATTGTTTTCCATAAGCGCTCTAGAATTTGTATGTGTTTTTTTTTTCAAAGGGTGCCCTAAATGCCTGGAAAACAACACGTCCTTTAATTTGCCTAAAGCGAAAAGGCAAAAATGGGGAGCAGAAAAAGAAATCCTTGATTCGCCGAAAGCTACAAAGGGGAAATAGAGAACAGAAAAGAAAAAAAAAGGGAGAAAGGAGGGAAAATGAAAACGTTTCGGCCACGCGTACGTAGGTATACCCAAGAGATATAGCCAGTGAGCCATTAGCTGGAGTCCTACACGTCTGTACACATCGAATCTCCCTTTC…
118	Chr01	4244881	4115745	A	ACATACATACATACATACATACATATAAGCAATGCTAGAAAGTCT	44	CTGCCGCCGCCGCGGCTGCATCGTCGCCGGCGAGGGTCGGGCGGGGGGAAGGCGGAGGGTGCGAGTTTGAGAATGGGAGAGAGAGGGGAATGGAGTGGAGGCGACGAGGCGGGGGGAGGAAATGGGATTTTTCGGGGGGGAATTTGCGAGCGGGAAATGCTTGCGGAGCAACGAAGGCGCGCGATGACGCGGGCGGTAAGATTGTTTCCCGCTTCCGCTTTTGGGACACGGGTTTCGATAGAGGAAGAAGAAGAAGAGGCGGATGCCTGGACAAACATACAAGGGATCAACCATACCGAATTTTGACTTATTTTGGTACTGTTGGTTTTACCAAATTTTGGTAGAGTTTTAAGGAAGGAAGTTTTTTAGAAATGCTAAAATTTAGTAAGTAGTACTCCA…	CTGCCGCCGCCGCGGCTGCATCGTCGCCGGCGAGGGTCGGGCGGGGGGAAGGCGGAGGGTGCGAGTCTGAGAATGGGAGAGAGAGGGGAATGGAGTGGAGGCGACGAGGCGGGGGGAGGAAATGGGATTTTTCGGGGGGAAATTTGCGAGCGGGAAATGCTTGCGGAGCAACGAAGGCGCGCGATGACGCGGGCGGTAAGATTGTTTCCCGCTTCCGCGTTTGGGACACGGGTTTCCATAGAGGAAGAAGAAGAAGAGGCGGATGCCTGGACAAACATACAAAGGATCAACCATACCGAATTTTGACTTATTTTGGTACTGTTGGTTTTACCAAATTTTGGTAGAGTTTTAAGGAAGGAAGTTTTTTAGAAATGCTAAAATTTAGTAAGTAGTACTCCA…
119	Chr01	4265010	4136495	CATTCATTTTTTTTTAAAAAATGCACTCTTGC	C	31	CGCCACCTGCCGCCGGATCTCGCCGGCGCCCCCGCCGAGGTGAAGCGCTACTTCATGCGCAGCGTCCTCCGCAACTACGTCCCCTCGCCGTCGCAGCGGATCAGGGTAAGTGTAGCTAGTATACGCGCTTTTACTATTTAGGCGTCTCATTAATTAATTCATTTCATCAAATCAAGCTTCATTAATTTTTGATTCTCTAGCAGCTATAGTCATAAATGCAGTTTAATTTGGCTTCATGTACGTAGTAGTCAGTTTTGCTTATTTACAACTGTTTTAAGTTTAATTAACCATGAGTAGTGTGTCTTGCTATTGCATGCATATGATGAGTTGGATATATAGTGTTAGTGTAAGTACATACGTAGTGTGTGTTGTTAATTAATTAAGATGAATTAATCACGT…	CGCCACCTGCCGCCGGATCTCGCCGGCGCCCCCGCCGAGGTGAAGCGCTACTTCATGCGCAGCGTCCTCCGCAACTACGTCCCCTCGCCGTCGCAGCGGATCAGGGTAAGTGTAGCTAGTATACGCGCTTTTACTATTTAGGCGTCTCATTAATTAATTCATTTCATCAAATCAAGCTTCATTAATTTTTGATTCTCTAGCAGCTATAGTCATAAATGCAGTTTAATTTGGCTTCATGTACGTAGTAGTCATTTTTGCTTATTTACAACTGTTTAAAGTTTAATTAACCATGAGTAGTGTGTCTTGCTATTGCATGCATATGATGAGTTGGATATATAGTGTTAGTGTAAGTACATACGTAGTGTGTGTTGTTAATTAATTAAGATGAATTAATCACGT…
120	Chr01	4280477	4152134	GCCGTCCACACTCGGGGGAGGAGCCCGCCGGC	G	31	GGGACCTGTTGTACCCGATTTTGCGAGCAAGGGATGAAAATCGGACTGGGCAACAAATAGAGGAACCCAAAGAGGGACCCAAAGTGAACTTATTTCGGAGGTCTTTGACTCCCTCAACTATGATCCGAGTATGATTCATGGCCTCCAACCACAAAACTGTGTATATTGACTCCTCCAACTATCAAAACCGATGCAAACTATATCCTTGGGTGGTTTTGAAAGCGGTTTTAGCTGACGTGGCACCCACGTGGCAGTGTTGACCCAGTCTTCGTCTCGCGTGTCGTCGACGTGTCGCTTATCTACATGTAATAAAAAAACTTGTGGGACCGACATGTCATTCACACAAAAATAAAATAGTGGGACCCACGGACATGTGGGCCCACATGTCATCCTCACCTC…	TTGGGGGACCTGTTGTACCCGATTTTGCGAGCAAGGGATGAAAATCGGACTAGGCAACAAATAGAGGAACCCAAAGAGGGACCCAAAGTGAACTTATTTCGGAGGTCTTTGACTCCCTCAACTATGATCCGAGTATGATTCATAGCCTCCAACCACAAAACTGGGTATATTGACTCCAACTATCAAAACCGATGCAAACTATATCCTTGGGTGGTTTTGAAAGCGGTTTTAGCTGACGTGGCACCCACGTGGCAGTGTTGACCCAGTCTTCGTCCCGCGTGTTGTCGACGTGTCGCTTATCTACATGTAATAAAAAAACTTGTGGGACCGACATGTCATTCACACAAAAATAAAATAGTGGGACCCACGGACATGTGGGCCCACATGTCATCCTCACCT…
121	Chr01	4280612	4152237	GGCGTCCGCGCGCGGGGGTGGAGCTCGCCGGCCGTCCGCGCGCCG	G	44	TCATGGCCTCCAACCACAAAACTGTGTATATTGACTCCTCCAACTATCAAAACCGATGCAAACTATATCCTTGGGTGGTTTTGAAAGCGGTTTTAGCTGACGTGGCACCCACGTGGCAGTGTTGACCCAGTCTTCGTCTCGCGTGTCGTCGACGTGTCGCTTATCTACATGTAATAAAAAAACTTGTGGGACCGACATGTCATTCACACAAAAATAAAATAGTGGGACCCACGGACATGTGGGCCCACATGTCATCCTCACCTCTCCCCCCTCTCTCTCTTTCATCTTTTCCACTCCTCTCACCTTCCAATAGTAGAAGCGGGGCGGCGGCGACGGCGACGACGCACGGGGGAGGAGCTCGCCGGCCGTCCACACTCGGGGGAGGAGCCCGCCGGCCGT…	GGTCTTTGACTCCCTCAACTATGATCCGAGTATGATTCATAGCCTCCAACCACAAAACTGGGTATATTGACTCCAACTATCAAAACCGATGCAAACTATATCCTTGGGTGGTTTTGAAAGCGGTTTTAGCTGACGTGGCACCCACGTGGCAGTGTTGACCCAGTCTTCGTCCCGCGTGTTGTCGACGTGTCGCTTATCTACATGTAATAAAAAAACTTGTGGGACCGACATGTCATTCACACAAAAATAAAATAGTGGGACCCACGGACATGTGGGCCCACATGTCATCCTCACCTCTCCCCCCCTCTCTCTTTCATCTTTTCCACTCCTCTCACCTTCCAATAGTAGAAGCGGGGCGGCGGCGATGGCGACGACGCACGGGGGAGGAGCTCGCCGGCG…
122	Chr01	4340348	4216432	T	TAACTAGTACCTTTTTACGTGAAACAAAATA	30	TTCATTGGTGCCCTCGAACAGTTATCCCAAAAATATCCATCCATTTAGCTTGCAAGAATAGGGATAGTGGTGATAGGACAATAGCCATTTGGAAAAAAAATAGGATTATTATAGGACATTTTAGGACTATTTGAAAAAAATGGCTGTTAGGAATCTTGTCTCGAAAATAAATTGCGACCGTTGTTAGGAATTGAGAGAATGATACAAGTAAAATGCATATTCTCAATGGTCCTTTAAAATGCAACACTGCTATACTATACTTGATATATTTCTTCTTTGATTTTTCCCTGCATTTAGATCTTCATGTTGGAGTACTAGTTAAGAACTAAAATCTTAACACCACACCAACATGAAGCCTTGATTCAACTTCTTGGCTGAGCGGGCATGTTTCTCAAACTA…	ATTCATTGGTGCCCTCGAACAGTTATCCCAAAAATATCCATCCATTTAGCTTGCAAGAATAGGGATAGTGGTGATAGGACAATAGCCATTTGGAAAAAAATAGGATTATTATAGGACATTTTAGGACTATTTGAAAAAAATGGCTGTTAGGAATCTTGTCTCGAAAATAAATTGCGACCGTTGTTAGGAATTGAGAGAATGATACAAGTAAAATGCATATTCTCAATGGTCCTTTAAAACGCAACACTGCTATACTATACTTGATACATTTCTTCTTTGATTTTTCCCTGCATTTAGATCTTCATGTTGGAGTACTAGTTAAGAACTAAAATCTTAACACCACACCAACATGAAGCCTTGATTCAACTTCTTGGCTGAGCGGGCATGTTTCTCAAACTA…
123	Chr01	4342375	4218518	ATGTATAGTGTGTCTAGATTCATTAACATCTA	A	31	TGGGTGGATGGCGACGGCCTGGGGATGTGGGCCCGCGGGGGCGGTGCCACGTGTGAAGAGAAGGATGGCCCAGGTGGCCACTGTTGGAACGTGGGTCCCACCATACCTTTGATTTGCAAAATAATTATGCCATATCTCGTGCTAATATATTTGTTTGTTTTGGGATAAAAAATTTTTATCTATGTGAGAGAGCTAGCCTAAATCATTACAGGTGAGTTGGTGAGATGAGAATTTAGACCGGTCCACCAAACGAGATGATGGTACATTTAGACACTACTCTCTCTGTGAAATACTTTATCTTTCTTTTTTGCCTTCACTACATAAACAGAAATGCATTTCGGCTGAACTCATTCTGGCTAGAGCGCAGCCAATTCAAACGGCCGTATTTAGTACTCCATC…	GGATGGCGACGGCCTGGGGATGTGGGCCCGCGGGGGCGGTGCCACGTGTGAAGAGAAGGATGGCCCAGGTGGCCACTGTTGGAACGTGGGTCCCACCATACCTTTGATTTGCAAAATAATTATGCCATATATCTCGTGCTAATATATTTGTTTGTTTTGGGATAAAAAAATTTTATCTATGTGAGAGAACTAGCCTAAATCATTACAGGTGAGTTGGTGAGATGAGAATTTAGACCGATCCACCAAACGAGATGATGGTACATTTAGACACTACTCTCTCTGTCTGGAAATACTTTATCTTTCTTTTTTACCTTCACTACATAAACAGAAATGCATTTCGGCTGAACTCATTCTGGCTAGAGCGCAGCCAATTCAAACGGCCGTATTTAGTACTCCATC…
124	Chr01	4351383	4227411	CGGCGCCCGGCGGGGTCGCGCCCGGTGGAGGGCTGT	C	35	GGATCCAAAAAGAACCGGGACTAAAGATTGTTTTTAGTCCCGGTTATAAAAATTTTGATCTTTAGTCCCGGTTGGTAACACCAACCAGGACAAAAGATGATCTTTAGTCCCGGTTCATCCGCTGTCAGATGTATGTCAGGGGGCCGAGGATCTTTAGTCCTGGTTGATGTCAATAACCGAGACTAAAGATCACCACTTTAGACCCGGTTGGTAGTACCAACCGGGACTAAAATTAAACATGTAGTATATAATCTCTATCCCTTATCCTCTCCTCCACAGTTACAACTTAGACAGATCGAATCTCACACCTCTCCTCAGATCTATCCTCTCTAACTCTCTTCTCCAACTCCTCCCCTTCTCTCCCCTTCCCGGCTGGCATCCCCTTCCTATCCAGCAGGC…	CATCTTTGGTCGGTCCGGCAAAATCCACAATAGTCCCGGATCCAAAAAGAACCGGGACTAAAGATTATTTTTAGTCCCGGTTATAAAAATTTTGATCTTTAGTCCCGGTTGGTAACACCAACCGGGACAAAAGATGATCTTTAGCCCCGGTTCATCCGCTGTCAGATGTATGTCAGGGGGCCGAGGATCTTTAGTCCCGGTTGATGTCAATAACCGGGACTAAAGATCACCACTTTAGACCCGGTTGGTAGTACCAACCGGGACTAAAATTAAACATGTAGTATATAATCCCTATCCCTTATCCTCTCCTCCACAGTTATAACTTAGACAGATCGAATCTCACACCTCTCCTCAGATCTATCCTCTCTAACTCTCTTCTCCAACTCCTCCCCTTCTCTC…
126	Chr01	4377557	4246372	A	ATGAAGATCTTATTTCCATGAACATATATTAT	31	ATTTCTGTTTCATCCTTTTCATCTCACAACAATGGCATCAAATTTTGGCAACCGACTTCTGCTGGTGGTAGTGCATGCGATGCTCTGAATTTGTCCTCAGTAAACAGACCTGAAACAAGATGGAAGCCTTGGCAAATAGAAGTTTTGGACAGGGCATTATTGTATGAAGGACCTGCATTTGCAGACAGGCTCTGCTGGGAGAATGGTGTGTTTTAATACACTTGGCAATATCTTTAGTTTTTTCATATTGTCTGTTGTCCTGCTATTCTAACTGCTTTTAGTCCCGAGTCTCTTTCTAGATGTTCGGTTGCCTGTCCCATCTTGCAGTCCTGCCGTTTTCTTAATATTTGGCTCATGGATTTATTTTTCCTTAAGGTTATGCTTACAGATTTATTTGCA…	ATTTCTGTTTCATCCTTTTCATCTCACAACAATGGCATCAAATTTTGGCAACCGACTTCTGCTGGTGGTAGTGCATGCGATGCTCTGAATTTGTCCTCAGTAAACAGACCTGAAACAAGATGGAAGCCTTGGCAAATAGAAGTTTTGGACAGGGCATTATTGTATGAAGGACCTGCATTTGCAGACAGGCTCTGCTGGGAGAATGGTGTGTTTTAATACACTTGGCAATATCTTTAGTTTTTTCATATTGTCTGTTGTCCTGCTATTCTAACTGCTTTTAGTCCCGAGTCTCTTTCTAGATGTTCGGTTGCCTGTCCCATCTTGCAGTCCTGCCGTTTTCTTAATATTTGGCTCATGGATTTATTTTTCCTTAAGGTTACGCTTACAGATTTATTTGCA…
127	Chr01	4393912	4262769	TCAAGGGCGATACGTTTAGTATGGTCGCCGGCAGCA	T	35	TCATTGATATGCTGGTTGTCTGGATCTGAATCCATCGAACTGCCATGAAATCTGAATCCTTCAGGACCAATTGTGAGTTCAGAGTTCTGGCAGTTTTGAGCCCCCTAGTCCTGCTTGAGAAGATATGCACTTGATCAGATTGTGCCTTTGATATTCTTGATAAGATTGTGCTATTTGATTGAGATTGTACTGTTCATTCCCAACAACCCTGGCGGCGATCGTCCAACGCCGGATGGATAATTCTTCTCACGTGGATTCCAACAATCCATGCCACACGAGACTTGGACTTCTTGCTAAGAAAAAGAAATATAGCATTCCAGTAGGCCATAAGGAAATATTCAAGCCTAGGACGGCCCCAATTTCGTCTGCCACCACCAACCAAACCAAACTCCTCACGAG…	CTCATTGATATGCTGGTTGTCTGGATCTGAATCCATCGAACTGCCATGAAATCTGAATCCTTCAGGACCAATTGTGAGTTCAGAGTTCTGGCAGTTTTGAGCCCCCTAGTCCTGCTTGAGAAGATATGCACTTGATCAGATTGTGCCTTTGATATTCTTGATAAGATTGTGCTATTTGATTGAGATTGTACTGTTCATTCCCAACAACCCTGGCGGCGATCGTCCAACGCCGGATGGATAATTCTTCTCACGTGGATTCCAACAATCCATGCCACACGAGACTTGGACTTCTTGCTAAGAAAAAGAAATATAGCATTCCAGTAGGCCATAAGGAAATATTCAAGCCTAGGACGGCCCCAATTTCGTCTGCCACAACCAACCAAACCAAACTCCTCACGA…
128	Chr01	4409337	4278546	A	AAATCTAGTACTAAACGAGTCATATTATCATATTATAAATCT	41	CTTAGAAGTTTAACTGTCTAAAAGAATTATTGCAACGTTCTTTATGCTGAAATTAACCTATAACTTACTTGTAAAAACAGCTTTTGGTATCATATTCTCTTAATTATAATATCCCTGAGACCATGAGTGAAACATGCATGTAATGTAGTTGGATGGAACCCTTTTTGAAATATTTACAGGCAGCAGAATCTCCAAGAAATGATGGGAGGGTAGATATCACTATCATTCTGCATGATTTTAACACGAGCTTAATCTGTAGTAATTACCTTTTTTTTCCCTCCGATCCTCTCTCTACTTTCTATCTCCACGTCACTTTCTTCTTAATTGCGTTCACGAAAAAAACTTTCTTCAGTTCTTAATTATTTTTGTCTCGCTCAAAGTACTCAATAATTACACTCA…	TTTAGAAGTTTAACTGTCTAAAAGAATTATTGCAACGTTCTTTATGCTGAAATTAACCTATAACTTACTTGTAAAAACAGCTTTTGGTATCATATTCTCTTAATTATAATATCCCTGAGACCATGAGTGAAACATGCATGTAATGTAGTTGGATGGATCCCTTTTTGAAATATTTACAGGCAGCAGAATCTCCAAGAAATGATGGGAGGGTAGATATCACTATCATTCTGCATGATTTTAACACGAGCTTAATCTGTAGTAATTACCTTTTTTTCCCTCCGATCCTCTCTCTACTTTCTATCTCCACGTCACTTTCTTCTTAATTGCGTTCACGAAAAAAACTTTCTTCAGTTCTTAATTATTTTTGTCTCGCTCAAAGTACTCAATAATTACACTCAA…
129	Chr01	4410984	4280220	GTGGCTCGATCGTGTGGTCTCTCTCCCCTTGGTCATTTTCTTATCTTTTTTG	G	51	TAATAAAAAGTGAGGACAAAAATTCTTTTAAAACCAAATTGTAACCTTTTAAATGAGTTTCGGCCTTTGAGCTGAAGTATAGAGCCAAACACCTCTAAGATCAAGATTGTAGTCACATATAAATATACTTTTTTCACTCAAACCCTAAACCATATCCTGAGTAGTAGAAACACATTTTTCTGGACGTGACGAGTACTATATGAAATATGAGCAAAATTTATACAGAAAAATATATCTTTGCAGGAATTCTCACGTACATTCTATGTACTCGAAACAGTGTCTCCAGAACTATCCATAATTTTGGAGACACATAACTCTCGTATTCGATCCATAAATAAAACCGTGTCTTCAAAACCATCGTCACATTGCACACCGTCACCTTCCTACGTGAGAGTTTCA…	TAATAAAAAGTGAGGACAAAAATTCTTTTAAAACCAAATTGTAACCTTTTAAATGAGTTTCGGCCTTTGAGCTGAAGTATAGAGCCAAACACCTCTAAGATCAAGATTGTAGTCACATATAAATATACTTTTTTCACTCAAACCCTAAACCATATCCTGAGTAGTAGAAACACATTTTTCTGGACGTGACGAGTACTATATGAAATATGAGCAAAATTTATACAGAAAAATATATCTTTGCAGGAATTCTCACGTACATTCTATGTACTCGAAACAGTGTCTCCAGAACTATCCATAATTTTGGAGACACATAACTCTCGTATTCGATGCATAAATAAAACCGTGTCTTCAAAACCATCGTCACATTGCACACCGTCACCTTCCTACGTGAGAGTTTCA…
130	Chr01	4411917	4281100	TATATATATATATATATATATATATATATATATATAT	T	36	TGAAGCTTACTAGTGACAAAATAGTCATCAACACCCTGACATTTAGTTAAAATATTGTCGTTAGAACAACTCAACAACATATGGATATTGCAGGCAATGCCAGTTCACATGATCTATCTCTCGGTCTCTCCGATATTTGAAACATGAATATTTATTTTCTCGAACGCACAAAAAATTTGCACGTCAATATATTAGCAGGAAATGAGTTTTTGTTATACAAAGCAATCAGCCAGACTGGCTTATGCCTAAAAGGGGGGACTTGAAGCTAGGAACTACTACGACGGTTAAAAACGCAACTCCAAACAGCGGGAGGGGGCAGAGCCACGCTACACTACCAAGAAATCCCCCAAAAAAAGCAACGCCGACTAAAGACCACAGCTGGCCCTCCGAACGGATGGA…	GGTGAAGCTTACTAGTGACAAAATAGTCATCAACACCCTGACATTTAGTTAAAATATTGTCGTTAGAACAACTCAACAACATATGGATATTGCAGGCAATGCCAGTTCACATGATCTATCTCTCGGTCTCTCCGATATTTGAAACATGAATATTTATTTTCTCGAACGCATAAAAAAATTGCACGTCAATATATTAGCAGGAAATGAGTTTTTGTTATACAAAGCAATCAGCCAGACTGGCTTATGCCTAAAAGGGGGGAGTTGAAGCTAGGAACTACTATGACGGTTAAAAACGCAACTCCAAACAGCGGGAGGGGGCAGAGCCACGCTACACTACCAAGAAATCCCCCAAAAAAAGCAACACCGACTAAAGACCACAGCTGGCCCTCCGAACGGATG…
131	Chr01	4435354	4304241	CTGCTTACAAGATCAGCAAAATACCAAGCCTC	C	31	AGAAAATTGATTTTCTTTTGCTACGGACCCATCCAAGCACCTTAATTGGAGATAGAAAGATAGAGGAGAAGGTGTCTATTTGATATTTACCGACGAGTCCATTCTTCATGTGGTTCAGTCTGATATACTTCTCAGGTGCCTTTTAAAAAATTGATGCTCTGCATGTGCATTCACATTTACCCTGTAAACCCAAACATGTAAGCTTGGCGATTGAGATTGTTACTGTTCTATTAACTGTTTCATGTCATGCTGTTTCATTTATATGTTGTTTCATTTTTGTTTATGTCACTAAGGAATGTCCACTTCTCACATTTGTCACTAATTCGGTTCAACTTCTCATATATGCCATCATTCCGTTATAGCACTTCTCATATTTGCCACTTTAAATTGCTCAAAGGT…	AGAAAATTGATTTTCTTTTGCTACGGACCCATCCAAGTACCTTAATTGGAGATAGAAAGATAGAGGAGAAGGTGTCTATTTGATATTTACCGACGAGTCCATTCTTCATGTGGTTCAGTCTGATATACTTCTCAGGTGCCTTTTAAAAAATTGATGCTCTGCATGTGCATTCACATTTACCCTGTAAACCCAAACATGTAAGCTTGGCGATTGAGATTGTTACTGTTCTATTAACTGTTTCATGTCATGCTGTTTCATTTATATGTTGTTTCATTTTTGTTTATGTCACTAAGGAATGTCCACTTCTCACATTTGTCACTAATTCGGTTCAACTTCTCATATATGCCATCATTCCGTTATAGCACTTCTCATATTTGCCACTTTAAATTGCTCAAAGGT…
134	Chr01	4570393	4402540	GTAGGTTGGTTCCACAACAAGGAACCAAACCAAT	G	33	TTATACGTAAAACTTTTATATACGTGTTATTAGCGATCTAAAAGCAAACGCTCGAAAATAAACTTCGATGAAAAGACATCAAAATCAACTCCAAATTTAAAGTTGAAAATTCAAATTTTGCCTGATAAGCATAAGTATAAGCGAAATGATGAGGCCGCTAAACACAGAACCTGCCCGTCAGTTCCATGTTCTTTCTTCACCCTCCCCTCTCTCTTCACCTCTCCTTCACCAATATTCAAAGGTTTTCGTGAAGTCTAACAAAATCTAAACCAGAGGTGCCGTGAACATGCTAGGTCCATTTCAAACCAATACGGTCCTAGAAGGCTGGACTGGACTTGACCCGTGTTGGTTTTCCACTGAAAGAATAAACAGCTAGGTCCGTTTCAAACCAATACGGTC…	TTGTACATAAAACTTTTATATACGTGTTATTAGCGATCTAAAAGCAAATGCTCAAAAATAAACTTCGATGAAAAGACATCAAAATCAACTCCAAATTTAAAGTTGAAAATTCAAATTTTGTCTGATAAGCCTAAGTATAAGCGAAATGATGAGGCCGCTAAACACAGAACCTGCCCGTCAGTTCCATGTTCTTTCTTCACCCTCCCCTCTCTCTTCACCTCTCCTTCACCAATATTCAAAGGTTTTCGTGAAGTCTAACAAAATCTAAACCAGAGGTGCCGTGAACATGCTAGGTCCATTTCAAACCAATACGGTCCTAGAAGGCTGGACTGGACTTGACCCGTGTTGGTTTTCCACTGAAAGAATAAACAGCTAGGTCCGTTTCAAACCAATACAGTC…
135	Chr01	4588544	4420406	ACTGTTTAACCATTTGTCTTATTCAAAAAAAATTAGAATTATTAT	A	44	TAACGAGATTAAGCTCACCGCTTGACTTTTACGGTACAATGTATTGGCAGTATATACTGTCAGTATTTACAAGGATACAATACAAATTTGCTAAAAAAATTGTAAATGATATTTTAATAATCTATTCTTAGGTTCAATCTCTATCTTTTGGCGTCGCCGTGCATGATTCAGGTGAGGGAGAGACGAGCCAGGCGGTGCGATTAGTCCTCTTTGGTGACTGGATTCACCGGCGCCTGCTTCCTGTTCAAGCGGCCAATCGCCGCCTCCCACCACCGTCTCATGCGATCTGTGCACACGAAAATGCATGCATTAACATATGTACTCTTATGTTCTCGTGTTATGTTCTTGCAAATATTCTCTGCAATTTTAATCTGTAGAATCTGACCTTAAGATGGCAAT…	TGTAGATAACGAGATTAAGCTCACCGCTTGACTTTTACGGGTATTGACAGTATATACTACCAGTATTTACAAGAATACAATAGAAATTTGCTAAAAAAAATTGTAAATGATATTTTAATATACTGCCACTATCGCCGTGCATGATTCAGGTGAGGGACAGACGAGCCAGGCGGTGCGATTAGTCCTCTTCGGCGACTGGATTCACCGGCGCCTGCTTCCTGTTCAAGCGGCCAATCGCCGCCTCCCACCACCGTCTCATGCGATATGTGCACACGAAAATGCATGCATTAACATATGTACTCTTATGTTCTCGTGTTATGTTCTTGCAAATATTCTCTGCAATTTTAATCTGTACAATCTGACCTTAAGATGGCAATGGTACAGGGAGCGTCACCAGTA…
136	Chr01	4590853	4422657	TCAAACTGTGTAACCTACCACCGGCGTACGCGATCGAT	T	37	GGAGGGGATTAAGAGGGAATAATTCCACACCATAATAGGTGTGGAATAAATCCCCTCCAATCCCTTTCTCATGGGGATTAACTGAACAAGGCTTAAGGGAGTTAAATTATACCAGTTTTAATAGTTAGAGGGTAAAGATATCATATACTGTATTACGGTTGGGATACGAATTAGAGTGGACCTGTATTTGAGGGTATCACAGTGCACTTATCTTAAGTTTTTCAACATGGGCAGCCTGCAATTTCATGGGCCGAACAGAAAGGCTGAGAGGCTGAGACCATGGGCTAGGCCGGAACCGAGCAGGGCTGCAAGCTATGTGCTCAAGTTCGAGTCGGACATTTTGTCCCGGCCAGTACGTCGGTTGTACGACGAGTCGGACATATCCCGGTGCATATAACG…	ATGGTTCGGTTTGGAGGGGATTAAGAGGGAATAATTCCACACCACAATAGGTGTGGAATAAATCCCCTCCAATCCCTTCCTCATGGGGATTAATTGAACAAGGCTTAAGGGAGTTAAATTATACCAGTTTTAATAGTTAGAGAGTAAAGATATCATATATTGTATTACGGTTGGGATACGAATTAGAGTGGACCTATATTTGAGGGTATCACAGTGCACTTATCTTAAGTTTTTCAACATGGGCAGCCTGCAATTTCATGGGCCGAACAGAAAGGCTGAGAGGCTGAGACCATGGGCTAGGCCGGAACCGAGCAGGGCTGCAAGCTATGTGCTCAAGTTCGACTCGGACATTTTGTCCCGGCCAGTACGTCGGTTGTACGACGAGTCGGACATCTCCCG…
138	Chr01	4657800	4471964	T	TATATATATATATATTATATATATATATATATATATATATAT	41	GATGTTAGCCGTCCATTTCTGATCATTTTTTTTCCTCGGTTACTCTCTCTCTCTCTCTCTCTCTCTCTCTAAAAAATAGACTACGTTATTAATTTTTGAATATGTATTTGAGCATTCTACTTATTAAAAAAATTATGTAAAAACATATGATATAAATCATATTTAAAGTATTTTTAGTGAAAAAACAACTCATAGAAAATAATAATTACACAGTTTTTTTTTAAATAGAACGAATGATCCGTATTTAACAAAGTTAACGGTGTCATCTATTATAAAGTAAAGGTAGCTTTACCATCAACGCTGTCTATTTAAACGCTTGTCGAAAAACGAGCATTTCATATATACACACTTATGAAAACACCAAAATACTTATTTAAAGAAAAGGAAGATAGTACTTAA…	AGGATGTTAGCCGTCCATTTCTGATCATTTTTTTTCCTCGGTTACTCTCTCTCTCTCTATCTCTCTTTTTAAAAAATAGACTACGTTATTAATTTTTGAATATGTATTTGAGCATTCTACTTATTAAAAAAATTATGTAAAAACATATGATATAAATCATATTTAAAGTATTTTTAGTGAAAAAACAACTCATAGAAAATAATAATTACACAGTTTTTTTTTAAATAGAACGAATGATCCGTATTTAACAAAGTTAACGGTGTCATCTATTATAAAGTAAAGGTAGCTTTACCATCAACGCTGTCTATTTAAACGCTTGTCGAAAAACGAGCATTTCATATATACACACTTATGAAAACACCAAAATACTTATTTAAAGAAAAGGAAGATAGTACTTAA…
139	Chr01	4687199	4501092	CCAATTCCACCCTTACCTCAATTTCCCATCC	C	30	TGGTTTTGTGGTTTAAGTAAAAAAAATTATACTTAATCATCAAATTTTAATTTTAAAAATTTATATAGTGTAACATTGTAAGATTTAGGTTTTTGGATTAAAAAAAAACTTCTATACTAGCAGTAATTGCTAGCATAGGATTTTTTTGACACAAGTAGTAATACTGCCATTTTTAAGTGTAACTGTGCCTTTTTTTTTTCCAAAGTTTGACCGTCTATCTTATTTAAAATTTTTTATGTTTAGTATTTTTTACTATTATTAGATGATAAAATATGAATAAAACTTTATACGTGACTTATTATTTTTTATTTTTATAATTTTTAGATAAGAGGAACAATCAAACATTATATATAGAAACCCACACACTTAAAATAGGACGGAGAAAGCCGTACTAATTCA…	GGTTTTGTGGTTTAAGTAAAAAAAATTATACTTAATCATCAAATTTTAATTTTAAAAATTTATATAGTGTAACATTGTAAGATTTAGGTTTTTGGATTAAAAAAAAAACTTCTATACTAGCAGTAATTGCTAGCATAGGATTTTTTTGACACAAGTAGTAATACTGCCATTTTTAAGTGTAACTGTGCCTTTTTTTTTTCCAAAGTTTGACCATCTATCTTATTTAAAATTTTTTATGTTTAGTATTTTTTACTATTATTAGATGATAAAATATGAATAACACTTTATACGTGACTTATTATTTTTTATTTTTATAATTTTTAGATAAGAGGAACAATCAAACATTATATATAGAAACCCACACACTTAAAATAGGACGGAGAAAGCAGTACTAATTCA…
140	Chr01	4688890	4502751	ATGAGTGAGGAATTTGCTCGATTCTATAACCTAATCATCTGA	A	41	GTGGTAACTCCCGCCCTCCCCTCCGCGTCGCCCCCGCCACGGCGAGGCTCCTCGGCCACCCCGCGCGGAAGGGGGCCGCGGCGCCGCCCGGATCGAGGTGCCGCGCGGAGGCGGAGGCGGAGGCCACAGCCGCCTCCGATGCTGCCTGCCCTAACCCGCCGCGGCGTGGGTGCGAAGAGACGAACCCGAACCCGAACCCTAAGAGAAACCCTAAGCCGGCGGAGAGAGGGGAGGAGCCGCCCGTCCGCGCCGTCGGCTGCGGCGGATTCGCCTTCCTCTGCGCCCTCGCTGGCCACACCGAGGTGATTATTGTCTCCCCCCACTCAACTATTTTCTGCGATGAATTTGCGTCGATTCTATAACCTAATCATATGATGAGTGAGGATTTTGCTATATTCT…	GTGGTAACTCACGCCCTCCCCTCCGCGTCGCCCCCGCCACGGCGAGGCTCCTCGGCCACCCCGCGCGGAAGGGGGCCGCGGCGCCGCCCGGATCGAGGTGCCGCGCGGAGGCGGAGGCGGAGGCCACAGCCGCCTCCGATGCTGCCTGCCCTAACCCGCCGCGGCGTGGGTGCGAAGAGACGAACCCGAACCCGAACCCTAAGAGAAACCCTAAGCCGGCGGAGAGAGGGGAGGAGCCGCCCGTCCGCGCCGTCGGCTGCGGCGGATTCGCCTTCCTCTGCGCCCTCGCTGGCCACACCGAGGTGATTATTGTCTCCCCCCACTCAACTATTTTCTGCGATGAATTTGCGTCGATTCTATAACCTAATCATATGATGAGTGAGGATTTTGCTATATTCT…
141	Chr01	4712084	4525895	AAGCCTGATACTACCATAGTTGTATACAGTCTTTTTTT	A	37	TGATCCTTTTCTTCATCATGTTGGCAAATAAATGCTAATCTTTGTACAGAGGATATCATTTTCTTGTACCAATCAGATTATTTATCCCAGTCTAAATGAAGGGAAATAGGGCTTGAAAGTGTCAGATGGGCAGAACTCTTGGTTATGCATCTCTTGCAGAGACCAAGAGCCGGTCCTTCCATTATCTAGATAGATGTGCATAAGCGATAAGTCTAGTGTATTGACTAGAAAATTAGCGTGCCACATTATAGCCCGTGTGTACTTGCTAAGTAGTTTTCAAAATTCATGTCTATAAAAGGTTGGTAAATGAAATATTCAATGGTGTTATTAACCGATGCAACAAGTTAAGCTAAATTAGCTTCCATGGCACTTATGCTAAAAAAAAGTAACTATTACCCT…	GATCCTTTTCTTCATCATGTTGGCAAATAAATGCTAATCTTTGTACAGAGGATATCATTTTCTTGTACCAATCAGATTATTTATCCCAGTCTAAATGAAGGGAAATAGGGCTTGAAAGTGTCAGATGGGCAGAACTCTTGGTTATGCATCTCTTGCGGAGACCAAGAGCCGGTCCTTCCATTATCTAGATAGATGTGCATAAGTGATAAGTCTAGTGTATTGACTAGAAAATTAGCGTGCCACATTATAGCCCGTGTGTACTTGCTAAGTAGTTTCCAAAATTCATGTCTATAAAAGGTTGGTAAATGAAATATTCAATGGTGTTATTAACCAATGCAACAAGTTAAGCTAAATTAGCTTCCATGGCACTTATGCTAAAAAAAAGTAACTATTACCCTT…
142	Chr01	4822935	4624226	A	AAAAAAAACAAACAAAAAAAAAACTTGAGAT	30	CATGCTTCTTGCTGCCACCAAGATGAACCTTGAGCACCCGGAAGTTTGTTCCTCCTAGGTCCAATCCATAGAACAATCCATCCTCTCTCCTGAATTCGTGGCACAAAACTGATCAGTGTAAACCCATCATTTTCAGAGATGTATCTACTGTCACTCTTGTTTCTGACGCTATGAACACAAATCAGAAATTCAGAATTCAGAGGAGGCGATGCATATGCAGGTATACTGACTGACCCAGTGGGGAGCTTGTCGACGTAGGAGAGCAGCATCTTGACCCTGCTCCCACCCTCCTTCTCCAGGCCGGCGCCCATCTCGCCGGCCATCGCCGCCGCCACATCCCGCAGCAGCGACGCCGGCGTCGCGCACCTCTCCCGCAGCTCCGCCACCACCTTCTCCGCC…	TGCCACCAAGATGCACCTTGAGCACCCGGAAGTTTGTTCCTCCTAGGTCCAATCCATAGAACAATCCTTCCTCTCTCCTGAATTCGTGGCACAAAACTGATCAGTGTAAACCCATCATTTTCAGAGATGTATCTACTGTCACTCTTGTTTCTGACGCTATGAACACAAATCAGAAATTCAGAATTCAGAGGAGGCGATGCATATGCAGGTATACTGACTGACCCAGAGGGGAGCTTGTCGACGTAGGAGAGCAGCATCTTGACCCTGCTCCCACCCTCCTTCTCCAGGCCGGCGCCCATCTCGCCGGCCATCGCCGCCGCCACATCCCGCAGCAGCGACGCCGGCGTCGCGCACCTCTCCCGCAGCTCCGCCACCACCTTCTCCGCCTCCACCTCCACC…
144	Chr01	4832291	4633531	A	AGTAACAGTGGAGTATAAAATATGGATATAAATATTACTA	39	AAGATGTCAAAATTGTGTTTTGGAGACCGTGTCGCTGTCAAAAACGATTTTTTTATGAGTATGGAGGGAGTATACTGCTGGTAGGTCAATACTAGTTCGATCCGGTTCTCCAATGGCTGCGTCACAGTGGCATTGCCATGGCTCATTGGCTCTGCTTTGCAGCTTTGCTGCGTGTCGCAGTGTCCGTGTGGATGATGAACACACAAACACACACGCAGTGATGAATTGGAATACTACCTCCGTCCTAAAATGTAGCTATTTCTAGCACAGTACTTTATTCCAAAATAAAGCTATTTTTCTACCCACCTTCTCCTCTCAACCAATCACAACCATTCTTTTTCACCTACTTTCTCTTTTCAACCAATCACACATCTTTTTCAATCATTATCACCTACTTTT…	GAAACAAGATGTTAAAATTGTGTTTTGAAGACTCTATTAAAAGTGATTTTTTTATAAGTATGGAGGGAGTATACTGCTGGTAGGTCAATACTAGTTCGATCCGGTTCTCCAATGGCTGCGTCACAGTGGCATTGCCATGGCTCATTGGCTCTGCTTTGCAGCTTTGCTGCGTGTCGCAGTGTCCGTGTGGATGATGAACACACAAACACACACACGCAGTGAAGAATTTGAATACTACCTCCGTTCTAAAATGTAGCTATTTTTAGCATAGTACTTTGTCTTAAAATGAAGCTATTTTTCTACCTATCTTCTCCTCTCAACCAATCACAACCATTTTTTTTACCTACTTTCTCTTTTCAACCAATCACACACATTCTTCAATCATTCTCACCTACTTTC…
145	Chr01	4952692	4753103	A	ATGTAGCCCCTTCTCCCAGGAATGAACACCTC	31	TCATCTGTCTTTCAAAAAAACCAACTTCTGATCTAGACATATACTCCCTCCTTCCCTAAATGTTTGACGCCGTTGACTTTTTTAAACATGTTTGACAATTCGTCTCATTCAAAAACTTTTGTGAAATATGTAAAATTATATGTATACATACAAGTATATTTAACAATGAATCAAATGATAGAAAAAGAATTGATAATTACTTAAATTTTTTAAATAAGACGAACGATCAAACATGTTTTAAAAAGTCAATGGCGTCGAGCATTTAGGAATGGAGGGAGTAATATGCCTATATTGGTAATTAGAATTTAACTTTACTTTTTTTAAGGACATGAGGAGTATCAATTAGACAATAATCTTATAAATCATGAAATTAAATCCGAACTCATGGTTACAAATGTT…	TCGTCTGTCTTTCAAAAAAACCAACTTCTGATCTAGACATATACTCCCTCCTTCCCTAAATGTTTGACGCCGTTGACTTTTTTAAACATGTTTGACAATTCGTCTCATTCAAAAACTTTTGTGAAATATGTAAAATTATATGTATACATACAAGTATATTTAACAATGAATCAAATGATAGAAAAAGAATTGATAATTACTTAAATTTTTTGAATAAGACGAACGATCAAACATGTTTTAAAAAGTCAATGGCGTCGAGCATTTAGGAATGGAGGGAGTAATATGCCTATATTGGTAATTAGAATTTAACTTTACTTTTTTTAAGGACATGAGGAGTATCAATTAGACAATAATCTTATAAATCATGAAATTAAATCCGAACTCATGGTTACAAATGTT…
146	Chr01	4956456	4756914	AGTGTGGGTCGCTGGGGAGCAGCACGCATGCATGGCCATCACGCACGCTAA	A	50	AAAATTATAAAGAAGTAAAACAAATAAATCATCGTATAAAGTACTAACTATAAAAAATTAAAATAAAATGGACGATCAAACATTAGACATAACAAGATAGAATAAAGAGCTCCTACTCACTTCCTTCCCAAATATATATAAAGTTTTGGTTAAATAAAACACATTATAATACTACGAATTTAGATAAAAGGTTTATTCAGATTCATACTATTAAGATATATTTCATCAATCTAAAACTTCTTATATTTTAAAGACGGGGAAATAGTATATTTGTGGCAGCTACACTAGTCGACATGGTCGTACGTGCTGCCATCTTTGTCACTGCACAGTAGCACAGCGGCTGTAGTAGCGCCGCGCCATCTTTGCCCATTCCATGCGTGCTTGACCCGATCGATCGAG…	AAAATTATAAAGAAGTAAAACAAATAAATCATCGTATAAAGTACTAACTATAAAAAATTAAAATAAAATGGACGATCAAACATTAGACATAACAAGATAGAATAAAGAGCTCCTACTCACTTCCTTCCCAAATATATATAAAGTTTTGGTTAAATAAAACACATTATAATACTACGAATTTAGATAAAAGGTTTATTCAGATTCATACTATTAAGATATATTTCATCAATCTAAAACTTCTTATATTTTAAAGACGGGGAAATAGTATATTTGTGGCAGCTACACTAGTCGACATGGTCGTACGTGCTGCCATCTTTGTCACTGCACAGTAGCACAGCGGCTGTAGTAGCGCCGCGCCATCTTTGCCCATTCCATGCGTGCTTGACCCGATCGATCGAG…
147	Chr01	4959739	4760182	TGACCATTCCTACCAATCTGGATGTCACTTTTCTA	T	34	TACTACCTCTGTCCCAATATATATAAGTATAGTCATGGATATCCGTGTCCAGCGTTTGACCGTTCGTCTTATTTAAAAAATTTGTGAAAAATTTGAAAATATTTAGTCACATATATAGTACTATTCATGTTTTATCATCTAATAGCAATAAAAATACTAATCATAAAGAAATTTCAAATAAGACGAACGGTCAAACGTTGAACGTTAACAGTTTAAAAGTGCACTTATTTTGGGACGAAGGGAATAAGTGTTTCACGTAAAATAAAGTGGTAATAACGTGTGATTAATTGAGTTTTAATTATTACAAACTTAAAAAATAGATTAATATGATATTTTAGAACAACTTTCATATAGAAAGTTTTTGCACGAAACACACCGTTTAGCAGTTTGGAAAGCGTG…	AAAATTACTACCTCCGTCCCAATATAAGTGTAGTCGTGGATATCCGTGTCCAGCGTTTGACCGTTCGTCTTATTTGAAAAATTTGTGAAAAATTTAAAAATATTTAGTCACATATATAGTACTATTCATGTTTTATCATCTAATAGCAATAAAAATACTAGTCATAAAGAAATTTCAAATAAAACGAACGGTCAAACGTTGAACGTTAACAGTTTAAAAGTGCACTTATTTTGGGACGAAGGAAATAAGTGTTTCACGTAAAATAAAGTGGTAATAACGTGTGATTAATTGAGTTTTAATTATTACAAACTTAAAAAATAGATTAATATGATATTTTAGAACAACTTTCATATAGAAAGTTTTCGCACGAAACACACCGTTTAGCAGTTTGAAAAGCAT…
148	Chr01	4960094	4760502	G	GTTTTTTCTCTTCTAAAGATAAAGATTAAATT	31	AAGTTTTTGCACGAAACACACCGTTTAGCAGTTTGGAAAGCGTGTCACGAGTATCCAAAATTTATCCTCTCCCTACAGAAGAAACAGATGGGGGTCTAAACACTACTCCCTTCGTTTCAAAACAAACTAACTTAGAAGGGAATGTGACCATTCCTACCAATCTGGATGTCACTTTTCTAGATTTGTGGTATAAGGAGGGGTCACATCCGTTTTTAGGTTAGGTTTTTTTTATAGAGAGGGTAGTAAATAGTGGAGCATTTGATATTTAATTATGGTCTTGTTACTAGTTATTTAAAAATTCTATAATTAAACCTTTTATATCTGTTGCTAACACATAAATAATAGGCAAATATCGTGATAACTGACTTGTCAAGATAGGTGATGAACAATATGTTTACA…	GATTAATATGATATTTTAGAACAACTTTCATATAGAAAGTTTTCGCACGAAACACACCGTTTAGCAGTTTGAAAAGCATGTCACGAGTATCCAAAATTTATCCTCTCCCTACATAAGAAACAGATGGGGTCTAAACACTACTCCCTTCGTTTCAAAACAAACTAACATAGAAGGGAATGTGATTTGTGGTATAAGGAGGGGTCACATCCGTTTTTAGGTTGGGTTTTTTTACAGAGAGGGTAGTAAATAGTGGAGCATTTGATATTTAATTATGATCTTGTTACTAGTTATTTAAAAATTCTATAATTAAACCTTTTATATCTGTTGCTAACACATAAATAATAGACAAATATCGTGATAACTGACTTGTCAAGATAGGTGATGAACAGTATGTTTACA…
149	Chr01	4964427	4764857	G	GCTGCACACGTCGCGCGCCCGGCCGCGCGCGGCG	33	AGGTGCGGATGGAATGTTTGGATTTCTTTTGTCTCAAGGCTATAGCTTTTTTTGATCGATCGATGCTTTTTTAGTTGTGTGGCTGAGACGAAAGGCTAACATGTGCCCAACTCGATGCCGGTCTTGCCACGTACGTACAAGGAGGGTAGATTGTATATAGACAGATGCTAAACAAAAAAAAGGGCTGATCGATGAGTGTGCGTTTGACTGTTTGAGCCGTGCCCCTCCTGCCGGTCAATTGGGAGTTGGTAGGGGACAGTTTGGGTTTTTCTTTTAGAGATGACTGATGAGGGAGAGGCAGCGAGGGCGTTTGGTTAGTTGGTTGGTGCGCGAGAAGATTGGATGATCCGAGAGTCGAGGAGGTAGTTAGTTAGTAGTAACACGTAATGCGGTTGAGTC…	GGTGCGGATGGAATGTTTGGATTTCTTTTGTCTCAAGGCTATAGCTTTTTTTGATCGATCGATGCTTTTTTAGTTGTGTGGCTGAGACGAAAGGCTAACATGTGCCCAACTCGATGCCGGTCTTGCCACGTACGTACAAGGAGGGTAGATTGTATATAGACAGATGCTAAACAAAAAAAAAGGGCTGATCGATGAGTGTGCGTTTGACTGTTTGAGCCGTGCCCCTCCTGCCGGTCAATTGGGAGTTGGTAGGGGACAGTTTGGGTTTTTCTTTTAGAGATGACTGATGAGGGAGAGGCAGCGAGGGCGTTTGGTTAGTTGGTTGGTGCGCGAGAAGATTGGATGATCCGAGAGTCGAGGAGGTAGTTAGTTAGTAGTAACACGTAATGCGGTTGAGTC…
150	Chr01	4979708	4787818	AAATTCAGCATCTCTGACGAAGCACAAGATTCATGCACACAAACACAA	A	47	GGCCGGCTCCGCCCAGTTGTAGTGGTGGTGGTACTGGTACTCCACTGCCACCGCCGCTGGTTCAGATTTGTCGCCGTCGCCGCTGCTCTTGGTGGTGGCGTCTTTGGACGATGCCGTCTTCCCACCGGCGCGGCCAGCCTCGTCGGCGCGTGTGGCGGCTTCCTTCCTGGCCGTGCACTTGCTGCATTCCTGCTTGCACGCCGCCGCCGTCGCTGGCGACTTGTTGCCTTTGCCGTCCTTGCCTTCGTCTTTGCGCGCGCTCTTCTCGTCCGCCGGCGAGGTCGGCTTCTCGCCGCCATTGCTGTTGCTCTTCTTGCCTTCTTCCGAAGGCGCAGCCGGTGACGGCGGCGGCGGCGCCATCACCTCGGCGATCTTGCCGACCTTCGAGAGCTTCTGGAC…	CATGGCCGGCTCCGCCCAGTTGTGGTGGTGGTACTGGTACTCCACTGCCACCGCCGCTGGTTCAGATTTGTCGCCGTCGCCGCTGCTCTTGGTGGTGGCGTCTTTGGACGATGCCGTCTTCCCACCGGCGCGGCCAGCCTCGTCGGCGCGTGTGGCGGCTTCCTTCCCGGCCGTGCACTTGCTGCATTCCTGCTTGCACGCCACCGCCGTCGCTGGCGACTTGTTGCCTTTGCCGTCCTTGCCTTCGTCTTTGCGCGCGCTCTTCTCGTCCGCCGGCGAGGTCGGCTTCTCGCCGCCATTGCTGTTGCTCTTCTTGCCTTCTTCCGAAGGCGCAGCCGGTGACGGCGGCGGCGGCGCAATCACCTCGGCGATCTTGCCGACCTTCGAGAGCTTCTGGAC…
151	Chr01	4980535	4788594	TCACTTTTCAGGGTCACAAAGTGAACTTATCCC	T	32	TCACCGGAGCAGCGTCTTCCCCGGGAGTGAGGTCCGCCGCCGGCTCCCGCTCGCAGCCGTTCCCCTCGTCCTCCCACTAGGGGATCCGGCCCCTCGCCTGCCCGCCCTCCCGTCGCCACCGTCGGCTCCCACCCGCTGCCGCCGCCGCCGCCGCTGGCCCCTGTCCCATGGCCACCGCTTGCTGAACGGAAGAGAGAGAGAGAGGGGGGAGGGGGGGGGGGGGAGGATGAAGAGAGGATGATTTATGTGGGCCCCACATGTCAGTGGGTCCCACCCATACAATGACAAATGGGTCCCACACATATTTTTTTATTTCTAATGCCACCTAGGTGCCACGTCAACGCCACTTGAAAAGAAGACCGACTCAATATTGCCACGTAGGCGCCACATCAGCAAAAC…	GGCGTCACCGGAGCAGCGTCTTCCCCGGTAGTGAGGTCCGCCGCCGGCTCCCGCTCGCAGCCGTTCCCCTCGTCCTCCCACTAGGGGATCCGGCCCCTCGCCTGCCCGCCCTCCCGTCGCCACCGTCGGCTCCCACCCGCTGCCGCCGCCGCCGCTGGCCCCTGTCCCATGGCCACCGCTTGCTGAACGGAAGAGAGGGAAAGGGGGGAGGGGGGGGGGGGGGGGGATGAAGAGAGGATGATTTATGTGGGCCCCACATGTCAGTGGGTCCCACCCATACAATGACAAATGGGTCCTACACATTTTTTTTATTTCTAATGCCACCTAGGTGCCACGTCAATGCTACGTGAAAAGAAGACCGACTCAATATTGCCACGTAGGCGCCACGTCAGCAAAACC…
152	Chr01	5003745	4811157	A	ACTCTCTCTCTCTCTCTCTCTCTCTCTCTCTCTCTCTCTCTCT	42	AGGACGGCGCGGGCGCGCATCCCCACCGCGGCGGCCTCGTCGTACGCCGCCTGGAGCGCGGCGACCGTGACCTGGAACCCGTTCGCGCTGTCGCACCGCACCGGCACGATGTTCACCCCCGTCCTCCACCTCAAGTCCCTGTCAAACCTGCACGCCATGGATGTCAGCTCAGCCTGCCACTCTGCTCGATCGATCCCAAGCTAGCTAGATGCATGGCAATGGCAATGGCAATGGAACAGTGGCTTACCCGGGGTAGTAAGGGGTAGGGATGAGCAGGGCGTCGCCGGGGTTGGCGAGGATGAAGGTGAGGAGCTCGTTGGCGGCGGTGGCGCCGGCGGTGAGCACGATGTGGTCGGGGTCAAACCTCGCCTTGCCGCCGCGTATCTTCCCCATGAAGCT…	GTGATCAGGACGGCGCGGGCGCGCATCCCCGCCGCGGCGGCCTCGTCGTACGCCGCCTGGAGCGCGGCGACCGTGACCTGGAACCCGTTCGCGCTGTCGCACCGCACCGGCACGATGTTCACCCCCGTCCTCCACCTCAAGTCCCTGTCAAACCTGCACGCCATGGATGTCAGCTCAGCCTGCCACTCTGCTCGATCGATCCCAAGCTAGCTAGATGCATGGCAATGGCAATGGAACAGTGGCTTACCCGGGGTAGTAAGGGGTAGGGATGAGCAGGGCGTCGCCGGGGTTGGCGAGGATGAAGGTGAGGAGCTCGTTGGCGGCGGTGGCGCCGGCGGTGAGCACGATGTGGTCGGGGTCAAACCTCGCCTTGCCGCCGCGTATCTTCCCCATGAAGCT…
153	Chr01	5004988	4812467	TGGACGACTTGTCTAGCTAGCTATCTCGAGCT	T	31	TTGCTCACTCTCTCTCTCTTTCTCCCTGACTGACCTTTCAGTAAAGGAGGAAGTTAGCAATACAGACAGTGTAGCGTAGTACAGCTGTAATCAGAAATTCAGATCGTCGTCTGCAAATTAAGGCAGCTTCCGTTGTCGCCATTCTCCGGCTGATCGAAGAAATTCAACAGATGCAGCAGCAGCAGCAGCTCAAGCCGTCAAGCCCGTGCGATCGTGTCTACAGGTGTTACGCCTTATCTTCTCCTTTAACCCAACCCTTTGTTTAATCCAGGCTAATGCCCACGTCGTCATCGTCCTCTTCATCGTCTTAACAAAACCAGCTAAGAAAAAAATTTATGACTATAGCTCTGTTACCATATTAAGTTTTAATTTATCGTCTGCAGGTTTGATGGTTATGAA…	GCCCAATGATTGATTGCTCACTCTCTCTCTCTTTCTCCCTGACTGACCTTTCAGTAAAGGAGGAAGTTAGCAATACAGACAGTGTAGCGTAGTACAGCTGTAATCAGAAATTCAGATCGTCGTCTGCAAATTAAGGCAGCTTCCGTTGTCGCCATTCTCCGGCTGATCGAAGAAATTCAACAGATGCAGCAGCAGCAGCAGCTCAAGCCGTCAAGCCCGTGCGATCGTGTCTACAGGTGTTACGCCTTATCTTCTCCTTTAACCCAACCCTTTGTTTAATCCAGGCTAATGCCCACGTCGTCATCGTCTTAACAAAACCAGCTAAGAAAAAAATTTATGACTATAGCTCTGTTACCATATTAAGTTTTAATTTATTATCTGCAGGTTTGATGGTTACGA…
154	Chr01	5017542	4824974	TGGTTCGCCTGCTCGTGGTCGTCGTGCTGCTGCT	T	33	GCATTTCGACTACTTCTACGACGAGGCCATGGCCGGCGCCGCCGGCGACCACACGTCGGACTGGAAGCTGGCCACCGTCGCCGAAGGGTCGCCTGGTGGCAGCGCGCGGTCGGACGCCACCGACGGCGGCGGCGGCGCGGCCAAGCAAAAGGCGGCCATCGACTTCCGCCGCCACGAGAGCGGCTCCGCCGGCAGCTCGAGCAACTTCTCCTTCGCCTTCCCCATGTACGCCGCCGACGACGCCATTGTCGTCCTCTTCATCATCATCATCACGAGAAAGAAAACTAACCCCCCTCATCTCCATTGCAGATTGGCGGAGACGACGACGTCGCCGAGGAAGAGGGACTACGGCGGGATGTACCATCCGCTGAAGAAGGAGGCGGAGCAGCAGCAGGCGGC…	GCATTTCGACTACTTCTACGACGAGGCCATGGCCGGCGCCGCCGGCGACCACACGTCGGACTGGAAGCTGGCCACCGTCGCCGAAGGGTCGCCTGGTGGCAGCGCGCGGTCGGACGCCACCGACGGCGGCGGCGGCGCGGCCAAGCAAAAGGCGGCCATCGACTTCCGCCGCCACGATAGCGGCTCCGCCGGCAGCTCGAGCAACTTCTCCTTCGCCTTCCCCATGTACGCCGCCGACGACGCCATTGTCGTCCTCTTCATCATCATCATCACGAGAAAGAAAACTAACCCCCCTCATCTCCATTGCAGATTGGCGGAGACGACGACGTCGCCGAGGAAGAGGGACTACGGCGGGATGTACCATCCGCTGAAGAAGGAGGCGGAGCAGCAGCAGGCGGC…
155	Chr01	5031646	4839101	T	TATATATATATTATTATATATATATATTATATATATATATATATATATA	48	TGCCATATGATGATGCAATTAGTATATTGTGACATAAGAATAACTATATCATGATGATGGACGTTACTAACATTGAAAGAACAAGCTAACAGCCAATCTAGAGTGCGTTGACTATTGATAGTGGTGATTGTTTTGCATTTCCTACATCACAGTCTCTGAAGAATGATGAGTACCAATGCTTTGTTCTTCTTATGTTCGATTCTGAATTAACCTATTTACTGCAAGGTCTGAATTATCTGAATCGACATACAAATTGCCCTACTTTTTCCTTAAATCACTTGAAATTCTTAAAATAGCAGGATGAATCCAAGAGTCATAAAGGAAGTGATCAAACAGTTAGAGCATCTGGGAAGGTACGGAAACGTGAAGCTACAGGGCAGAAAGAGAAGGAAGCACCTC…	TGCCATATGATGATGCAATTAGTATATTGTGACATAAGAATAACTATATCATGATGATGGACGTTACTAACATTGAAAGAACAAGCTAACAGCCAATCTAGAGTGCGTTGACTATTGATAGTGGTGATTGTTTTGCATTTCCTACATCACAGTCTCTGAAGAATGATGAGTACCAATGCTTTGTTCTTCTTATGTTCGATTCTGAATTAACCTATTTACTGCAAGGTCTGAATTATCTGAATCGACATACAAATTGCCCTACTTTTTCCTTAAATCACTTGAAATTCTTAAAATAGCAGGATGAATCCAAGAGTCATAAAGGAAGTGATCAAACAGTTAGAGCATCTGGGAAGGTACGGAAACGTGAAGCTACAGGGCAGAAAGAGAAGGAAGCACCTC…
157	Chr01	5081328	4895183	AGGATTCTATCTCTAGAACTGTACCTTATCTAT	A	32	GTTATTGATGAAGCGTCTTGCAGATTAATCTGTTAGAGGACGCGGGATGTCCATCCTTGTGGACAAGTGGCGGCGGCGTGTTTCCCTTGTTGATGAAGACCATCGGCGATGTTGCATCGGCGAAGACAATTGCGCAGTCGTACGGCTGATGATGATCAGTACTGTCGGTGTAGATGAAGTCGTGCGCGGGGAGGTCCGTGCGCCTGTGCACCGAAGTTTGACCTTCTCGTGCCTTCCCGAGGATGTGCCACACGATCCATGCATGCATGCGCATGACAATGGTTGTGGTTGTTGGCTTGCTGCTTCTGCTCATGAGGATCATGGAGCTAATGAAGATCTAATCTAATGCTAATCATTACTTAATCTAGGAATTTTTTTCAAATATGTTGTATTCTGATG…	CCTGTGGGAGTGGAGCTGAAGCCATCGCTAGACCGTTAATTCCGCTGCTGTTTTTCTTTTCTTTTGTAAGTATGTAACGTTATTATTATGATGGATTTGTATATTAAATTGTCAGTTTGTGTATCTCAGCTGATTTCTGGACGAGGATTTTATGCACAAATTAGTTCGGAAATTATTAGTGAATTTCCGGGCGTGACAGCTAGCTAATGAAGATCTAATCTAATGCTAATCATTACTTAATCTAGGAATTTTTTTCACGGTGGTTGATGGATGCGCGCCCCAGGGAGACTAAAAAGATGTCATCTCCCCGGGGTGGCGCGAGCGGAAGACTAATGGAGCGACGGTAGTCTCTATGTCTCTGATACCATGTGGAAAAATCTAATATGTTGTATTCTGATG…
158	Chr01	5082315	4896139	ATCTAATATTGGATAAAACACGTTGTAGTACTAT	A	33	TGCTGATAGGGATCCAGCTAATTAAGTCTCTCCAACATTTGTGTCGATGCAGATTGACTGCCGTGCATTTGCCAGCTTTGTACATGTTACAGTTGTGTGCTACTCCATCTCATAACATAAGATGCGTACATATTTTAAAATTTAACTTTTATAAGAATTGATCAACGGTTAGTATTATATGAACTGAATTTTATTTGCTGAAAATTATCGTTGGATTGGTATTTGAATGTACTTCTATATGGTTATAATTTGGTTATTACAAATCTTATAATATATGAAAAATTATAAGCTAAGGATTAATTTTGTAAACCATACCAAGTTTGATCGTGCCTTATATTATGGAATAGTGAGAGTACAACCCACCACATATAAAATTCCCATCGACTCGTATTCCTAATT…	TGCTGATAGGGATCCAGCTAATTAAGTCTCTCCAACATTTGTGTCGATGCAGATTGACTGCCGTGCATTTGCCAGCTTTGTACATGTTACAGTTGTGTGCTACTCCATCTCATAACATAAGATACGTACATATTTTAAAATTTAACTTTTATAAGAATTGATCAACGGTTAGTATTATATGAACTGAATTTTATTTGCTGAAAATTATCGTTGGATTAGTATTTGAATGTACTTCTATATGGTTATAATTTGGTTATTACAAATCTTATAATATATGAAAAATTATAAGCTAAGGATTAATTTTGTAAACCATACCAAGTTTGATCGTGCCTTATATTATGGAACAGTGAGAGTACAACCCACCACATATAAAATTCCCATCGACTCGTATTCCTAATT…
159	Chr01	5088168	4901628	TTATATTGATGTTAATAAATCTAGACATATATATATATATATATATA	T	46	CAAGAGATCCATGTCAGCATATTTTACTACTTGGAAGAGATTAAATAAAGAGAGAGCAAAACTATCTACTAACTTGAAGACAGTCTATAGAGAAAAACGGGACAATGTATTAGAGAACTATAGATACCCATATAGACATACCATTGAGGTGGTTTACTATTAATCTAGTCTATTGCTGAGATGTACATGTTTTATAGAGAGCAACTTACTTTATCATTGTGGGTGATCTAATAATAGGCACGAAATTTCATGTGCCGATCGATGCGTGCATGCATCCATCGGGACATGCAGCTGCAGCACACGATCCCACACTGTTCACCCGTGTACGCTATTTAAGCTTCGAATCAATCAATATATTCAATAATCAGTCAGGTAAAGCTGATTATTATTCGTTCATTA…	CTCTCTACAAGATATCCATGTCAGCATATTTTACTACTTGGAAGAGATTAAATAAAGAGAGAGCAAAACTATCTACTAACTTGGAGATAGTCTATAGAGAAAAACGGGACAATGCATTAGAGAACTATAGATACCCATATAGACATATCATTGAGGTGGTTTACTATTAATCTAGTCTATTGCTGAGATGTACATGTTTTATAACTTACTTTATCATTGTGGGTAATCTAATAATAGGCACGAAATTTCATGTGCCGATCGATGCGTGCATGCATCCATCGGGACATGCAGCTGCAGCACACGATCCCACACTGTTCACCCGTGTACGCTATTTAAGCTTCGAATCAATCAATATATTCAATAATCAGTCAGGTAAAGCTGATTATTATTCGTTCATTA…
160	Chr01	5089545	4904162	CCACCTGCTGCCGACCGGGCGAGGTCCGCCTCCGC	C	34	TGCATGTAGCTTCGCCCCTGGGCAGAGGTCGACGAGGCGCCGACACGGTCCTGTTCGCACGACTGCCTCCTCACGGACCACTCGTGCATCGGCTCGCCGCCGCGGCTCCCAACGGTGGGGAGGTGGTTGCGGGAGTCGTAGAAGGGGCCGCGCCGGCTCCGTGGCGCGCGTGGAGGGGAGAGAGCAGAGAGCAGAGGAGAGGAGAGAGAGGAGTGCAGAGGAGAGGAGAGCACTGGCACGCCTCCATCTCCGTGGAGCTCGTCATGGGCTCGAGGCCGCCCCGGCGACCGCATCTTCTCCGACCACGACAAAGAGAGGATCGACTTCAACCAAGACGGACGAGGTCCGCTACCCGCCGCCTGGACAAGGTCCGTCTCCGCCACCCAACGACTGAGCAAG…	TGCATGTAGCTTCGCCCCTGGGCAGAGGCCGACGAGGCGCCGACACGGTCCTGTTCGCACGACTGCCTCCTCACGGACCACTCGTGCATCGGCTCGCCGCCGCGGCTCCCAACGGTGGGGAGGTGGTTGCGGGAGTCGTAGAAGGGGCCACGCCGGCTCCGTGGCGCGCGTGGAGGGGAGAGAGCAGAGAGCAGAGGAGAGGAGAGAGAGGAGCGCAGAGGAGAGGAGAGCACTGGCACGCCTCCATCTCCGTGGAGCTCGTCATGGGCTCGAGGCCGCCCCGGCGACCGCATCTTCTTCGACCACGACAAAGAGAGGATCGACTTCAACCAAGACGGACGAGGTCCGCTACCCGCCACCTGGACAAGGTCCGTCTCCGCCACCCAACGACTGAGCAAG…
161	Chr01	5133329	4950090	T	TCAAAAATATTATAATTTTTTCTATAAATTTGATCAAACTTAGAGG	45	GCAGAAGCAGCAGGGGGAGGGTTGGGCTTGCCGTTGGAAGACATTGCCGCCGGAGAGAGAGGAGGATGGTGCGGCGGCGCGGCGGTGGTGGAGAGGAAGAGGAGGAAGAGGAGATCTATAGGAGGCGAGAGGAGGAAGAAGGTGAGGGGGAAAAGAGACGGGTGACCTTACGGATGGTTCGAGCTCACCAAATCATTTGTTGCTGCTGCCTTTTCTCTCACTCGCTCTCTCTCACTGTTCTTTTTCTTTGGAAAAAAAAATCGAGGGAATTAACCTTTCGTTGATCATCAGAGGTCAGCTGAGGTGACAGTGTGTTTCCCGGGAAATTCTAAGCTTGGCTGGCGCCACTCCATGCGAGGAGATTTGGCGGGTGCAGTGGTATTTCGCCTTCTTAAAAAA…	TTGGGCTTGCCGTTGGAAGACATTGCCGCCGGAGAGAGAGGAGGTTGGTGCGGCGGCGCGGCGGTGGTGGAGAGGAAGAGGAGGAAGAGGAGATCTATAGGAGGCGAGAGGAGGAAGAAGGTGAGGGGGAAAAGAGACGGGTGACCTTACGGATGGTTCGAGCTCACCAAATCATTTGTTGCTGCTGCCTTTTCTCTCACTCGCTCTCTCTCACTGTTCTTTTTTTTTTTGGAAAAAAAATCGAGGGAATTAACCTTTCGTTGATCATCAGAGGTGAGCTGAGGTGACAGTGTGTTTCCCGGGAAATTCTAAGCTTGGCTGGCGCCACTCCATGCGAGGAGATTTGGCGGGTGCAGTGGTATTTCGCCTTCTTAAAAAAATGGTATTGTTTTGACTTCT…
162	Chr01	5137960	4954768	G	GTCTTCTAGAGCTAGACTTATTCTTTTTACTGCTAAATCAATACAGAA	47	CGAAAAGGAGCATTTGATTTTTCTTTTTTGTTAAACATCTCTCTCTCTCCATCCAATCCAACTACGTGGATGGAGGTTGAGTGCGCCAGATGTCATGCTCCTACTTGTTGGCCAACCGTCGACAAGGCGCCGGCGCAGTGGCTGCGTGTTGAAGGTGTTTAGTTGGCAGTAGCTGCTGAGGCTAGGAGGTGCACTTCGGCATGGGAGGGTACAAAGATTACGGGCGAAATTCTAGCCTGTTTGGGCCGATAACGGCGACGCTTGCGGGCGCTGCATGGGGGCGTTGTCGCGGAATATTCCCTCTCCTAAATAGATTTATTGCGAAAACCACGTCCTCTTAGGATGGGCGGCGGTGGCGCTCTCGACGTTGTATTCTCCCTGGAGACGTCATTTGAAGTT…	TACGAAAAGGAGCATTTGATTTTTCTTCTTGTTAAACATCTCTCTCTCCAATCCAACTACGTGGATGGAGGTTGAGTGCGCCAGATGTCATGCTCCTACTTGTTGGCCAACCGCCGACAAGGCGCTAGCGCAGTGGCTACGTGTTGAAGGTGTTTAGTTGGTAGTAACTGCTGAGGCTGGGTGGTGCACTTCGGCATGGGAGGGTACAAAGATTACGGGCGAAATTCTAGCCTGTTTGGGCCGATAATGGCGACGCTTGCGGGCGCTGCATAGGGGCGTTGTCGCAGAATATCCCCTCTCCTAAATAGATTTATTCAGGCGAAAACCACGTCCTTTCTTAGGATGGGCGGCGGCGGCGCTCTCGACGTTGTATTCTCCCTGGAGACGTCATTTGAAGTT…
164	Chr01	5192511	5012368	C	CATCTAACAAACTCTAAGATACCATAAGTCTTTGCGGC	37	ATAAGTATGAAAAGAAGGACAATATCTAGACAATCAAGCCATTGGAATTTTCATAGAGTGGTAGATATCATGTACAATCTAAACCAACATCGATATTTAACCTAATCGGCTGACCTCTACTAGTAGATGTTAGCTGATTGTAGGTTAGATGATGATATTGCTATATATTATATAAGATATATGATAACTCGACGGATTACATAAACAAGATTAGAGTATCATAGAGATGGAAGCACTAATCCCGAGAACGCAAGCCGCCATAACAAGTTTTACCTCTTGTTGAAGATCGAAACCGATGCAGCTCAACCCGAAAGCAATAACTTGTCGAAATAAAACGAAAGCAAAAAAGGGTGGCGATGCACCAAGATTGTATTAAACGTGTGTGTTAATTGATTACAT…	TATAAGTATAAAAAGAAGGACAATATCTAGACAATCAAGCCATTGGAAGTTTCATAGAGTGGTAGATATCATGTACAATCTAAACCAACATCGATATTTAACCTAATCGGCTGACCTCTACTAGTAGATGTTAGCTAATTGTAGGTTAGATGATGATATTGCTATAGATTATATAAGATATATGATAACTCGACGGATTACATAAACAAGATTAGAGTATCATAGAGATGGAAGCACTAATCCCGAGAACGCAAGCCGCCATAACAAGTTTTACCTCTTGTTGAAAATCGAAACCGATGCAACTCAACCCGAAAGCAAGAACTTGTCGAAATAAAACGAAAGCAAAAAGGGTGGCGATGCGCCGAGATTGTATTGAACGTGTGTGTTAATTGATTACAT…
165	Chr01	5210929	5032163	TACTGCTTACTTGAGAATAGTAAGCAAGTCA	T	30	AACTGACGACTGTTCAAAGGTCCAAGGAAAATGAAGGCCTAATCCTGATCCATGTCCCCCCTGCACTGCGAGTGTCCTGCCACCATAAACCGGAGCCTGCAACAGCTGACCAGAAGCAAGGACAAGAATGCAGAGCAGAACGATCAAACTCTACATACCTGGACGTTGGATTCTTAGCTCTCGAGCTATGTGAAATACCCTTCTCATCTGTGGAAAATACACAACTAAAGGGGTGGACAAGATTGACCAGAGACTCTTCTTCATCATGCACTGCCGTCATATGCAATACAATGTTGATATCATCATATACGGCGTAAGACGAACATCTTCCATTGAAAGTTACAGCACATTAGTAGTCTCCTTTCAATCAGTAAACTGTTGTGAAAACTGGAAAGTATG…	ACTGACGACTGTTCAAAGGTCCAAGGAAAATGAAGGCCTAATCCTGATCCATGTCCCCCCTGCACTGCGAGTGTCCTGCCACCATAAACCGGAGCCTGCAACAGCTGACCAGAAGCAAGGACAAGAATGCAGAGCAGAACGATCAAACTCTACATACCTGGACGTTGGATTCTTAGCTCTCGAGCTATGTGAAATACCCTTCTCATCTGTGGAAAATACACAACTAAAGGGGTGGACAAGATTGACCAGAGACTCTTCTTCATCATGCACTGCCGTCATATGCAATACAATGTTGATATCATCATATACGGCGTAAGACGAACATCTTCCATTGAAAGTTACAGCACATTAGTAGTCTCCTTTCAATCAGTAAACTGTTGTGAAAACTGGAAAGTATGC…
167	Chr01	5229193	5050453	T	TGCCCTTGTCCTTCTACACATCATATTAGGGCTGT	34	TTTTTTCCTCACTGTTATTTTTTTAATAATAAAGGAATCTCTTTATTTTGAGACAGGAGTTGTGTGGTGAACATGTTTTGAGTCTTTTATTATACCTTGGATAGTCTATAGTACTATGAGGGAGGATAGTATGGCACTCTTTTTGTTGGGTTTCAGTGGGTCCTGTTCTTTTCTTCAACAAAAGTTGGATAAACTTTTGGATACTCGTGACACGCTTTTGATACTACTAAACGGTATATTTTGTACGAATATTTTCTATATGAAAGTTGTTCTAAAATATCATATTAATCCATTTTTCAAGTTTGTAATAATTAAAACTCAATTAATCACACGTTATTACCACCTCGTTTTGCGTGAAACACTTAATCTTTATCTTCATCTTCAGGAGATTCAAACACC…	TTTTTCCTCACTGTTATTTTTTTAATAATAAAGGAATCTCTTTATTTTGAGACAGAAGGAGTTGTGTGGTGAACATGTTTTGAGTCTTTTATTATACCTTGGATAGTCTATAGTACTATGAGAGGATGGTATGGCACTCTTTTTGTTGGGTTTCAGTGGGTCCTGTTCTTTTCTCCAACAAAAGTTGGATAAACTTTTAGATACTCGTGACACGCTTTTGAAACTACTAAACGGTACATTTTGTACGAATATTTTCTATATGAAAGTTGTTCTAAAATATCATATTAATCCATTTTTCAAGTTTGTAATAATTAAAACTCAATTAATCACACGTTATTACCACCTCGTTTTGCATGAAACACTTAATCTTTATTTTCATCTTCAGGAGATTCAAACACC…
168	Chr01	5243278	5064540	T	TCATGCATGTCAGGTTTAGAGAAAAAAAAAAC	31	CACGCACGCACGCACGCACGCATCCAGCTGATCTAGCCGGCCGAGATGTGCCACTTTGACCGGTCGTCAGACACGCTGCATCAATGTAGGAGCACGTGCCAGGGTATGGTCGCTGCATGCCTGCCTGCAAACAATACTATACTCCTCCCATAAACAAATCAAACTCCAACAAGAGAATCCGACTTGCTAGAAAAACATCATATCACTTTAAACAATGGAGATTGGAGAGTCCATCAGTCCAATGTGTTTTTCTGTCTTCTTTGACCATCTTCCAATTCCCCATTATGCTTGTGCTGACCTCTATCTAATTGATCCTAAGAGAAGCGTTTTGCAACATCTTGTAAAAAAGCAAATCACATAATATTACTCGTGCTTTATGTAGCTAAGCTACATTGGATC…	CGCACGCACGCACGCACGCATCCAGCTGATCTAGCCGGCCGAGATGTGCCACTTTGACCGGTCGTCAGACACGCTGCATCAATGTAGGAGCACGTGCCAGGGTATGGTCGCTGCATGCCTGCCTGCAAACAATACTATACTCCTCCCATAAACAAATCAAACTCCAACAAGAGAATCCGACTTGCTAGAAAAACATCATATCACTTTAAACAATGGAGATTGAAGAGTCCATCAGTCCAATGTGTTTTTCTGTCTTCTTTGACCATCTTCCAATTCCCCATTATGCTTGTGCTGACCTCTATCTAATTGATCCTAAGAGAAGCGTTTTGCAACATCTTGTAAAAAAGCAAATCACATAATATTACTCGTGCTTTATGTAGCTAAGCTACATTGGATCAG…
169	Chr01	5306379	5137370	G	GTTGAGCCTAATTAGTCTATGATTAGTCTATGT	32	TTTAGGGGTGGTTCATCATCTCTCCTCACTTCTCTCCTTCATCTTATCACCTAATCCTATGTGTTATTTTTAGAGACAGCACATGAAGCACTATAGCACTTGCCCTTAGGGCCTAGTACTAGCAGAGAGGAGGGCGGGGGCATGCCATGTCATGTCATCCTGGCGTGGCGTGGCGTGGCGTGGTGTGGTGAACTTGCCAGAAAGCAGAAAGCAGAGAGTGCACTGATTCCTTCACAAATCTGGCGACTCCACCAGTCTAGAGAGGAGTAGACTAGTAGTAGGAGTAGTAGGCATGCTGCTGCCCTGCCATGGAACAGACATGAGCAGCGCCGCGCCGCGCCACACCACCCCACACCCACTGATACCGAAAGATATCGTGATCAGATCCAGTGCAGTTGA…	CATCTCTCTCCTCACTTCTCTCCTTCCTCTCATCACCTAATCCTATGTGTTATTTTTAGAGGCAGCACATGAAGCACTATAGCACTTGCCTTAGGGCCTAGTACTAGCAGAGAGGAGGGCGGGGGCATGCCATGTCATGTCATCCTGGCGTGGCGTGGCGTGGTGAACTTGCCAGAAAGCAGAAAGCAGAGAGTGCACTGTGATTCCTTCACAAATCTGGCGACTCCACCAGTCTAGAGAGGAGTAGACTAGTAGTAGGAGTAGTAGGCATGCTGCTGCCCTGCCATGGAACAGACATGAGCAGCGCCGCGCCGCGCCACACCACCCCCCACCCACTGATACCGAAAGATATCGTGATCAGATCCAGTGCAGTTGATTCAGGGCTGTTTGGATAAATTT…
170	Chr01	5318069	5149371	TTGACTTTTTCTCACATATTTGACCATTCGTCTTATTCAAAAA	T	42	ATAATGTCACAAAACAGTATATTGGTAATGCAAAAACAATGTACCAACAGTCATTTGCTTCCCATATGAGGGGCAACAAGAACGAAAATGGTATCAATTTAATTAAGCGGACAAGTTAGAGCCAAAGATGACCCGAACTAAGGTGGTGAGGATGTAGTGGTGTACATCCACACTTCCCACCAACTGAGCTAGGGTTCAGTTCCTTCTTTCTGTAACTTTATCACAAAGTCGTAATGATGTTTCAGGCATGTGTACATATGTATGAGCAACACCATGATTGTTCCTTTCTCTTACTAGTATGCTGCACTTTGATGAATTGTGTTTGTCAAACTTTTTCACTGGTGTGCATGTGCTCACCTTATACCTTATAAACAATCAGATAATCCACAAATGCTTCTG…	ATAATGTCACAAAACAGTATATTGGTAATGCAAAAACAATGTACCAACAGTCATTTGCTTCCCATATGAGGGGCAACAAGAACGAAAATGGTATCAATTTAATTAAGCGGACAAGTTAGAGCCAAAGATGACCCGAACTAAGGTGGTGAGGATGTAGTGGTGTACATCCACACTTCCCACCAACTGAGCTAAGGTTCAGTTCCTTCTTTCTGTAACTTTATCACAAAGTCGTAATGATGTTTCAGGCATGTGTACATATGTATGAGCAACACCATGATTGTTCCTTTCTCTTACTAGTATGCTGCACTTTGATGAATTGTGTTTGTCAAACTTTTTCACTGGTGTGCATGTGCTCACCTTATACCTTATAAACAATCAGATAATCCACAAATGCTTCTG…
171	Chr01	5369307	5198302	T	TATATATATATATATATATATATATATATATATATATATATATATATATATATATA	55	TCGACGACATCGCTGGCCAACCACAGCATTGTACGTACGTCAAGCCTTGCATCACCCGGGGTCCGGGCCTAGGACTAGGCTTTGTTCTTCTTCCAACTTTGCCAATCTCTTTCTCTTTTTTTCGAATATGTTTCACAAGCTACTAAATAGTAAGTTTTTTTAAATTTTTCTATTGAAAAGTTGCTTTTAAAAAAATATTAATCAAATTTCTAAAAAAATAAACTAATACCTAATTAATAATTAATTATATACTAATTCTTTGTTGGGTTTTCCGTGTCGAAACCTTGACTCCCGAACTCAGCCCGGAGGTCGACAAGACCAGCCGGGCATACAGTCTTTCTCCCCTTGGTGTGTACGGCGACGCCGGAGGACGAACAACCCTACCGTCCCAGCCGGCGG…	CGACGACATCGCTGGCCAACCACAGCATTGTACGTACGTCAAGCCTTGCATCACCCGGGGTCCGGGCCTAGGACTAGGCTTTGTTCTTCTTCCAACTTTGCCAATCTCTTTCTCTTTTTTTTTCGTATATGTTTCACAAGCTACTAAATAGTAAGTTTTTTTAAATTTTTCTATTGAAAAGTTGCTTTTAAAAAATATTAATCAAATTTCTAAAAAAAATAAACTAATACCTAATTAATAATTAATTATATACTAATTCTTTGTTGGGTTTTCCGTGTCGAAACCTTAACTCCCGAACTCAGCCCGGAGGTCAACAAGACCAGCCAGGCATACATGCTTTCTCCCCTTGGTGTGTACGACGACGCCGGAGGACGAACAACCCTACCGTCCCAGCCGGTG…
172	Chr01	5373691	5202117	GCTTTGCCATCGCGTCGTCGGGATCGTGTACTCGTCGTAGCCACCA	G	45	CTCTATCATAAGCTTTACTTTGTTTAGTTACCAATTTTTTTTTCCAAAAAGGTCGTATCGAATCTTTGTATACATGCATGAAGCATTAAGTATAAATAAATGAAAAAAAATTAATTGCACAGTTTGCATGGAAATCGCGAGACGAATTTTTTGAGCCTAATTAGTCTATGATTAGCCATAAGTGCTACATTAACCCATATGTGGTAATGATGGATTAATTAGGCTCAAAAGATTCGTCTCGCGGTTTACATGCGAGTTATGAAATTAGTTTTTTTATTCATTTCCAAAAACTCCTTCCGACATCCAGTCAAACGTCCGATTTAACATTAAATTAAGGCCATGATATTACTACCGTTATAGTCACCGATATGTAATTCTCACTCTCCTATTGTCTCACAC…	GAGGATCCTCTATCATAGGCTTTACTTTGTTTAGTTACCAATTTTTTTTTTCCAAAAAGGTCATATCGAATCTTTGTATACATGCATGAAGCATTAAGTATAGATAAATGAAAAAAAACTAATTGCACAGTTTGCATGGAAATCGCGAGACGAATTTTTTTGAGCCTAATTAGTCTATGATTAGCCATAAGTGCTACATTAACCCATATGTGGTAATGATGGATTAATTAGGTTCAAAAAATTCGTCTCACGGTTTTCATGCGAGTTATGAAATTAGTTTTTTTATTCATTTCCAAAAACTCCTTCCGACATCTAGTCAAACGTCCGATTTAACACTAAATTAAGGCCATGATATTACTACCATTATAATCACCGATATGTAATTCTCACTCTTCTATT…
175	Chr01	5468213	5302205	A	ATTTACTCCCGGTTTTTCTCACCAACCGGGAGGAAAGTTATC	41	CATGCATGTGGCATTCACATATGTTAATTAGAGTTCTTAACAATTAATTTAATATCCTAATTATATATGATTATTAAATTTTTTATTAATTTTAAATCATGTCGTATGTATATACATATGTTAATTAGAGTTTTTAACAATTTAATATCATTCATATGCTAAGTATATATGATTATTAGAATTTTTATTAATTTTAAAACGTAATATTTGCTTATTACGTTTTATCCACTTAATTTATTACAGACAGTACTAATTTTCCGTAGTAATTGTCATTAATTTTTGTACTTTAAATAAATTTAATGCATTATTTTCTATTTTAGAAACACATATGTAATGGAAAATAATACTCAGTGCACTTATCAGTAGCCCCGGTTCTTGACCCTAACCGGGTTTTAAAAA…	CATGCATGTGGCATTCACATATGTTAATTAGAGCTCTTAACAATTAATTTAATATCCTAATTATATATGATTATTAAAATTTTTATTAATTTTAAATCATGCCGTATGTATATACATGTGTTAATTAGAGTTTTTAACAATTTAATATCATTCATATGCTAAGTATATATGATTATTAGAATTTTTATTAATTTTAAAACGTAATATTTGCTTATTACGTTTTATCCACTTAATTTATTACATACAGTACTAATTTTCCGTAGTAATTGTCATTAATTTTTGTACTTTAAATAAATTTAATGCATTATTTTCTATTCTAGAAACACATATGTAATGGAAAATAATACTCAGTGCACTTATCAGTAGCCCCGGTTCTTAACCCTAACCGGGTTTTAAAAA…
176	Chr01	5683596	5494202	GAAACAGAAAAGTAAAACGTAAAAATTCAAGAAAGTATTTAAACCTATTCC	G	50	CCAATAATGCAGAAGCTATTTTGATTGCTTGAATACGACTAATCCATAAAGCCAGGACCTGAGAAGTAGTTAGCTAGCATTCTAACTTCCAGCAACATCCTTAACACAAGAATTCATGTCGGTAACATGCATGCATGCATGTTGTGATGTTGGTTTTCCCCTGCCAGTTGGGACCTACACCATCCCGTTCCATAGTCAATTAAACTTTTATAATTTTAACTATCAACATCTTTAAAAATATTTAATTTAAAGGCACTATAACAACATATATAGAGTTGTCTTGCAAATTACTACAATAGAAATAAATTTATATATAAAAAAATATAGTCAATAACGTTATTTTGAAGATCGTGTTATTATCTACTTCCTCCGTTTCATAATGTAAGTTATTCTAGTATT…	GGTCAATAATGCAGAAGCTATTTTGATTGCTTGAATATGACTAATCCATAAAGCCAGGACCTGAGAAGTGGTTAGCTAGCATTCTAACTTCCAGCAACATCCTTAACACAAGAATTCATGTCGGTAACATGCATGCATGCATGTTGTGATGTTGGTTTTCCCCTGCCAGTTGGGACCTACACCATCCCGTTCCATAGTCAATTAAACTTTTATAATTTTAACTATCAACATCTTTAAAAATATTTAATTTAAAGGCACTATAACAACATATAGAGTTGTCTTGCAAATTACTACAATAGAAATAAATTTATATATAAAAAAATATAGTCAATAACGTTATTTTGAAGATCGTGTTATTATCTATTTCCTCCGTTTCATAATGTAAGTTATTATAGTATT…
177	Chr01	5684428	5494985	T	TAACTACGAGTACAATATATATGCACCACGTCACTCGATAT	40	TACTTTTCTCGCAATCTTTGTACATGCATTGAGGTGTCACTACCAATACTCGAACCATTCGCTCCCAATCCTCTCGATCTAATTTACAATCAACAACAAATCAGGATGGGAAGCGAGAAATTGATGCGTCGTCCTACACTCACCGAAAAATTCTTGCGCTTCCATGCAGCCAGCCATCACCTTCGAGAGGAGGAGCAGCGTGTCTAACGAGTGGCCGCCGGAGGAGTTGCCACTCATGGATGCTAGCGACCTTGGTACTTCCTTCCAATACTCTCTGTCCGACAACAGCAGTGTATCTCGCTGTCCACTAGGTGACGTCGTACGTTGTGGCCGATATCTACCGCCACATTCTAGTCGGCTAGTTCTTACTTGGTGTGCCTAAATCCTAAAACCCCCCAT…	ACTTTTCTCGCAATCTTTGTACATGCATTGAGGTGTCACTACCAATACTCGAACCATTCGCTCCCAATCCTCTCGATTTAATTTACAATCAACAACAAATCGGGATGGGAAGCGAGAAATTGATGCGTCGTCCTACACTCACCGAAAAATTCTTGCGCTTCCACGCAGCCAGCCATCACCTTCGAGAGGAGGAGCGGCGCGTCTAACGAGTGGCCGCCGGAGGAGTTGCCACTCATGGATGCTAGCGACCTTGGTACTTCCTTCCAATACTCTCTGTCCGACAACAGCAGTGTATCTCGCTGTCCACTAGGTGACGTCGTACGTTGTGCCCGATATCTACCGTCATATTCTAGTCGGCTAGTTCTTACTTGGTGTGCCTAAATCCTAAAACCCTTCCCA…
179	Chr01	5710227	5521694	TCTAAAAAAAATAATTAGTATTGAATTATTTATGGGTAGTACTGTGTA	T	47	AATACCTGTATGGTTGTATCAAGTTTGCGTTTAGAGTTCAAAACAACCATCCATATGAGAAACAACTCAATACTACTCTGTCAAAAAAAAAAATAAATCCTAGCTACAAATCTAAACATAAATCAAAATATGTATATGTTAAGATTCATAATTAGTATTGAATTGCGAAAAGACCTGTAGCCTACTGGTTACAACAGCCTCAGTAGCACCTGAGATCCTGGGTTCGACTCCCTATGGGAGCAAATTTTTCAGGATTTAACGGCGTTGTGCTTTCAGTGATAGACGACGTACCCGTCGACAACGAGACGTCTGTGGTTATTTCGTCAATCTCTCCAGAATTTACCGGCCCTGTCTTCGAAGATGTTCATAGGGATAGGGTTTGCGTGCGTGTGTTCATAG…	GATAATACCTGTATGGTTGTATCAAGTTTGCGTTTAGCGTTCAAAACAACCATCCATATGAGAAACAACTCAATACTACTCTGTCAAAAATAATAAATCCTAGCTACAAATCTAAACATAAATCAGAATACGTATATGTTAAGATTCATAATTAGTATTGAATTGTGAAAAGACTTGTAGCCTACTGGTTACAAGAGTCTCAGTAGCACCTGAGATCCTAGGTTCGACTCCCTATAGGAGCAAATTTTTCAGGATTTAACGGCGTTGTGCTTTCGGTGGTAGACGATGTACCCGTCGACAACGAGGCGTCTATGGTTACTTCGTCAATCTCTCCAGAATTTACCGGCCCTGTCTTCGAAGATGTTCATAGGGATAGGGTTTGCGTGCGTGTGTTCATAG…
180	Chr01	5764171	5573082	G	GATGGGACAATTTCTTTTTTTTTTGAAAAGAA	31	TATCTTACCCTTTTACTAACTGCTTAATACTTTAACAGTACATTTTCAGCATTTGGCGAGAAGGGGAAGTTTCTTGTTTCTGGTGGCAATGATTCATCAATTAAATTATGGGATTGGTCCAAAGGGTTCTCCTCTGAAACAAACAACAGTGCTGAATTGGTGTTGGATATAAAGGTTAATAAAAAGGTAGCCACTCAACCTTAAATTCTGTGAAATGTTGTCTGCAGACTTTGGCTATCTATCTGCACATAATACTCCATTACTTGATGTACTACTAGATAGTAATTTTGCTGTTAACGGATGTGACTGAATTCTTAGGATTGGGTAAAATTGCTAACCTTTGATCTACATCTTGACAGGTGAACTGGTTGTGTACTACTCCGACTGATTCAGATAACC…	CTAACTGCTTAATACATTAACAGTACATTTTCAGCATTTGGTGAGAAGGGGAAGTTTCTTGTTTCTGGTGGCAATGATTCATCAATTAAATTATGGGATTGGTCCAAAGGGTTCTCCTCTGAAACAAACAGCAGTGCTGAATTGGTGTTGGATATAAAGGTTAATAAAAAGGTAGCCACTCTACCTTAAATTCTGTGAAATGTTGTCTGCAGACTTTGGCTATCTATCTGCACATACTCCATTACTTGATGTACTAAATAGTAATTTTGCTGTTAACGGATGTGATTGAATTCTTAGGCTCGGGTAAAATTGCTAACCTTTGATCTACATCTTGACAGGTGAACTGGTTGTGTACTACTCCGACTGATTCAGATAACCTGATTTTGTGTGACACATCCA…
181	Chr01	5785140	5592806	G	GCCGACGCGGGGCGACGAGCACGGCGGCAGTGGGACGCGAGCTCGGCGG	48	CAGCTATACAATATACTACAGTTAGATCTAAAAGTTTTCCACATAAAAAATTTGCAGCAGTTTTTTAATAGTCCCAAAATATTAGTTATACGCGGTTGCAAATGGTGGGTGTACGTAGAGGTGAGCGGGCGTGCCTAAACACTAAGGGTGTGTTTGGATAGAGGGATTTAAGTGGATAGGACATGGCGGCCCATTTTTGTGGGTGTTTGGTTCCTGGGCGGAGGTGGGATAGGGCGGTCCGGAGGGAAATATTCCGCCCAGATGTAGGATGGAGGGATCCGGTCGATTCGGCCGAATGCAGCTGCCCGAGCGCTCGAGCGAGCGGGGGCGAGCGACGAGTGGGTCGCGTCACCCCTCTCACCACGACACGAGCTCGGCGGCGGCTACGGCGAGCGGCGA…	TAGCTATACAATATACTACAGTTAGATCTAAAAGTTTTCCACATAAAAAATTTGCAGCAGTTTTTTAATAGTCCCAAAATATTAGTTATACGCGGTTGCAAATGGTGGGTGTACGTAGAGGTGAGTGGGCGTGCCTAAACACTAAGGGTGTGTTTGGATAGAGGGATTTAGGTGGATAAGACATGGCGGCTCATTTTTGTGGGTGTTTGGTTCCTGGGCAGAGGTGGGATAGGGCGGCCCGGAGGAAAATATTCCGCCCAGATGTAGGATGGAGGGATCCGGTTGATTCGGCCGAATGCAGCTTCCCGAGCGCTCGAGCGAGCGGGGGCAAGCGACGAGTGGGTCGCGTCACCCCTCTCATCACGACACGAGCTCGGCGGCGGCTACAGCGAGCGGCGA…
182	Chr01	5787717	5595165	GGGAAACAAAAGACCAAAGAAAAAAAAACTAGGTTATTATGACTCCAAAC	G	49	TTCTTATATCAACTTGTATATAAAAAAAGAACTTCCTTTAGTTTTCCTGTACTTATATTTCTACAAACCAAATGTCGTTCGTAAGAATTAGTCTTTACAAATCCAAATCTTATGCGCCCGCCCCCCCCCCCCCCCCCCCCCAAAATTTGGATACTTTAGCACTGAGAAAAGTTGCTGTTTTGAAGATGACTTGTCTGCAAACAAATCAATTACCGATTAATAGCACGCACGCACCTACGTTCCGCTCATACCTTGAACGGGAATGTGAACTCATCATGACCATAATAAACCCATACTTCCTCCGTTCCAAAATAAATATATTTGAGATTGACATTTTCTAATATAATAAATCCAGAAGAGATTTATTTAGATTCATTGTAATAGAAAATGTCGCATATT…	TTTAGTTTTCCTGTACTTATATTTCTACAAACCAAATGTCGTTCGTAAGAATTAGTCTTTACAAATCCAAATCTTATGCCCCCCCCCCCCAAAAAAAAAAAAATCTAACAAGCCCTAAGAACGCACCTTCCAAAATCAGCAAAGATTTGGATACTTTAGAACTGAGAGAAGTTGCTGTTTTGAAGATGACTTGTCTGCAAACAAATCAATTACCGATTAATAGCACGCACGCACCTACATTCCGCTCATACCTTGAACGGGAATGTGAACTCATCATGACCATAATAAACCCATACTTCCTCCGTTCCAAAATAAATATATTTGAGATTGACATTTTCTAATATAATAAATCCAGAAGAGATTTATTTTGATTCATTGTAATAGAAAACGTCGCATATT…
183	Chr01	5813175	5617445	TATGAGTAAATTTCACAAAACTACAGATATTTG	T	32	TATTTGCATGACTAATTTACAGGGAGCCAGATACTCATCTGCATGTGACTTTTCGGAGGCTTTTAAGTTAAGTTTGACAGATTACACCTGTCACATCAAGAAAATCGATTTGGCATGATCGGTTTAAATTTGACAGATGCAGATTATGTATTATTGGTATATGATTAACATGATTATGTGGGATAGACGGATAAGAAAAGAACAGGCGTTCAATCTTATTTGGCAACAGTTAGATATAAATTGCATTAATTTGAATTGGAACAGGTATCTCTGTCAGAGTAAACTTCATTCAGTTAAGTCATGCAAATAATTGAAACTGTACCATCCAGAGAGTATTACTACTACTTCATCTTTGCTAGGACAAGTAGCTGAACTTTTCTTTGATTACCCAATCAACAA…	GCTATTTGCATGACTAATTTACAGGGAGCCAGATACTCATCTGCATGTGACTTTTCGGAGGCTTTTAAGTTAAGTTTGACAGATTACACCTGTCACATCAAGAAAATCGATTTGGCATGATCGGTTTAAATTTGACAGATGCAGATTATGTATTATTGGTATATGATTAACATGATTATGTGGGATAGACGGATAAGAAAAGAACAGGCGTTCAATCTTATTTGGCAACAGTTAGATATAAATTGCATTAATTTGAATTGGAACAGGTATCTCTGTCAGAGTAAACTTCATTCAGTTAAGTCATGCAAATAATTGAAACTGTACCATCCAGAGAGTATTACTACTACTTCATCTTTGCTAGGACAAGTAGCTGAACTTTTCTTTGATTACCCAATCAAC…
184	Chr01	5866546	5686555	G	GTATGTGAATGACAAATAGTCAGTGGATCCTATTATAATTTT	41	CCCGATGACCTTGACCTTGGCCAGCGCCGGTAGCCGCATCCAGCACCCGAACTTCCCACCGCTGCCGCCGCCGCCACTACCGGCGGCGGCGGAGTGTTAACAATATTGCATCAACACGGAGGTGGAGCTGTACCGCCACGGCAACTGCACCCGGCACCCGATCTTCCCACCGCTGCCGCCGCCGTCGCCTCACTGTAGGATACGAGACAGGAGCGACCGCGGCGACTGGCAGCTCTCGATGCCGCCGCTCCGCCCGGCCTTCGCGCCGGCCTTCTCCACCCACCGCCGCCCACGGCTTCACGGCTTCACGCACTCCCTTGGCGCCCTCCACTCCGCTCCCTCGCCGCCCTCTGCTTTGCCATCCGTGCCCTCAGCAAGCTCTCCGCGCTGCTCGCCGAC…	GGCGCCCTCCCGATGACCTTGACCTTGGCCGGCGCCGGTAGCCGCATCCAGCACCCGAACTTCCCACCGCTGCCGCCGCCGCCACTATCGGCGGCGGCGGAGTGTTAACAACATCGCATCAACACGGAGGTGGACCTGTACCGCCACGGCAACCGCACCCGGCACCCGATCTTCCCACCGCTGCCGCCGCCGTCGCCTCACTGTAGGATACGAGACAGGAGCGACCGCGGCGACTGGCAGCTCTCGATGCCGCCGCTCCGCCCGGCCTTCGCGCCGGCCTTCTCCACCCACCGCCGCCCACGGCTTCATGCACTCCCTTGGCGCCCTCCACTCCGCTCCCTCGCCGTCCTCTGCTCCGCCATCCATGCCCTCAGCAAGCTCTCCGCGCTGCTCGCCGAC…
185	Chr01	5893149	5718672	TTTAATGGTAGTTAATATGTATAATTATGGTAT	T	32	GTACAAAGTCAGATGCTGTCTCATACTTGAACGTCACTTGCTCTCACCGAATAATTTGGTTTAAGATGGTCTCACAGTTTTGTTGAATGTGCTGGTAAAATGCAGGCTCTGATTGGCATGCACAACTTAAAGATGAGCAAAATCACCTGCTTTCTAGTGATCTACCTCGATTTATGATGGATTCCTATGAAGAATGTCGAGACCCACCACGACTTTACCTTCTTGATAAGTAAGACTTGATTGTTTTCTTTATTGATGCGCTTGTGGTTCCTGAAATGTTTTGTCTTTTAGATTTGATAATGCTGGAGCTGGGGCTTGTTCGAGGAGACATTCTGATCCATCATACTTCAAGAAAGCATGGGATATGATGAGAGCAGACAAGACAGGAAATTTCCAAAG…	GTACAAAGTCAGATGCTGTCTCATACTTGAACGTCACTTGCTCTCACCGAATAATTTGGTTTAAGATGGTCTCACAGTTTTGTTGAATGTGCTGGTAAAATGCAGGCTCTGATTGGCATGCACAACTTAAAGATGAGCAAAATCACCTGCTTTCTAGTGATCTACCTCGATTTATGATGGATTCCTATGAAGAATGTCGAGACCCACCACGACTTTACCTTCTTGATAAGTAAGACTTGATTGTTTTCTTTATTGATGCGCTTGTGGTTCCTGAAATGTTTTGTCTTTTAGATTTGATAATGCTGGAGCTGGGGCTTGTTCGAGGAGACATTCTGATCCATCATACTTCAAGAAAGCGTGGGATATGATGAGAGCAGACAAGACAGGAAATTTCCAAAG…
186	Chr01	5951431	5776965	T	TATATATATATATATATATATATATATATATATAC	34	TGGTTGCTGATGCTTGTTCCCATGATCCTGTCCTTGTTGTAGATAGAACGACACGCGGGGCATCTCCCGCCACATTCTTCCTTCTGATCCATTTCCATTATCTGATGCCAACACCAAAGACAAATCTGCCAGAAAATTATAAACACACATATTTTGTTAATACATAAGATTCACAACAGAAGAAATTAACCAAGCCACAAATGTGCATATTTTATAGAATCTGCAGCATGCAAATACACCAAATACATAAGGCAATATACAAAATTAACAGACCATGCATTTAATTTACCAAAATATGGACAATAACTATCTGAAATTTATTGCATTTGATAGTTGCATTACCCAAATGCCTGTGCATTTGCTAAAAATTAAATTCAATCCTACATGTCAAATAAATGT…	TGGTTGCTGATGCTTGTTCCCATGATCCTGTCCTTGTTGTAGATAGAACGACACGCGGGGCATCTCCCGCCACATTCTTCCTTCTGATCCATTTCCATTATCTGATGCCAACACCAAAGACAAATCTGCCAGAAAATTATAAACACACATATTTTGTTAATACATAAGATTCACAACAGAAGAAATTAACCAAGCCACAAATGTGCATATTTTATAGAATCTGCAGCATGCAAATACACCAAATACATAAGGCAATATACAAAATTAACAGACCATGCATTTAATTTACCAAAATATGGACAATAACTATCTGAAATTTATTGCATTTGATAGTTGCATTACCCAAATGCCTGTGCATTTGCTAAAAATTAAATTCAATCCTACATGTCAAATAAATGT…
187	Chr01	5975480	5805344	TTCTACCTGACTAAGGGCATGTCTGAGAAACAGAGAATATGATAGTT	T	46	AGAGGGAGTAGGTATCTACCACATAAAAGTTACTCACTCCGTCCCAAAATATAGGCTTTTTAGTTGTATTCATAGCCAAAAATACCTATATTTTGGGACGGAGGTAGTACAATATTATATGGATTATTAGTTTATTATTGTGTTGTGATGTGAGTCTTTAAGGCACAGTAGTATCTGTGGGACCCGGCACGCAAAACGAAGCATGTATTACTGTATGATTAATTAAGTATTAACTAATCTTTTTTAAAAATTGATTAATATGATTTTTTTAAAACAACTTTCGCGTAGATTTTTTTTTTAAAAACACACCGTTTAACGATTTGTAAAACGAGGAAAATCGGTTGGGAAAAAAAAGTGCCGAACACAGCCTAGAGATCTTTTCACTGTTCTACCTATCTC…	TTTTTTTTGGAATAGAGGGAGTAGGTATCTACCACATAAAAGTTACTCACTCCGTCCAAAAATATAGGCTTTTTAGTTGTATTCATAGCCAAAAATACCTATATTTTGGGACGGAGGTAGTACAATATTATATGGATTATTAGTTTATTATTGTGTTGTGATGTGAGTCTTTTAAGGCACACTAGTATCTGTAGGACCTGGCACACAAAACGAAGCATGTACTACTGTATAATTAATTAAGTATTAACTAATCTTTTTTTAAAATTGATTAATATGATTTTTTTAAAACAACTTTCGCGTAGATTTTTTTTTTCAAAAAACACACCGTTTAACGATTTGGAAAACGAGGAAAATCGGTTACCGCACACAGCCTAGAGATCTTTTCACTGTTCTACCTAT…
188	Chr01	5987302	5819375	CCGAAGCAGGCCACTCGGCATGCATCTCTCCACTGCCTTGCCGTCGC	C	46	AAACGTCCAATGTGACACCCAAAATTTTTTTTTTCACGAACTAAACAAGGCATGCGTTTCTGTCATGGCCCTAAAATCCAAAGTCTGAAGCCCCTTGATTTGTATAAAAAAATACAAAAAATTTGAAAAATTTCAATCCTGTGGAAGAAATTGTTTAGTAAGTCTTTGAAACAAGGGGATTGAATCCAATCAATTTCTTTAAAAAAAAACTACGAAATAGGCAATCCTACATATATTTTATAAGTCATCAGCACAATCTAAAAGTCCATCCCTAAAATTCTACTTTTGGATAAGTAGTTAGATTTTCAGGTGTCAAAAATTTCCTCCATCTAAGGACTAAGTAAACATTAACTCCTAAAAATGAAAATTGAGTAAACATTAACTCCTAAAAATGAAAAT…	AACGTCCAATATGACACCCAAATTTTTTTTTTCACGAACTATACAAGGCATGCGTTTCTGTCATGGCCCTAAAATCCAAAGTCTGAAGCCCCTTGATTTGTATAAAAAAAATACAAAAAATTTGAAAAATTTCAATCCTGTGGAAGAAATTGTTTAGTAAGTCTTTGAAACAAGGGGATTGAATCCAATCAATTTCTTTAAAAAAAAAACTACGAAATAGGCAATCCTACATATATTTTATAAGTCATCAGCACAATCTAAAAGTCCATCCCTAAAATTCTACTTTTGGATGAGTAGTTAGATTTTAAGGTGTCAAAAATTTCCTCCATCTAAGGACCAAGTAAACATTAACTCCTAAAATTGAAAATTGAGTAAACATTAACTCCTAAAAATGAAAAT…
189	Chr01	6014880	5846731	TATATATATATATATATATATATATATATATATATATATATATATATATA	T	49	GAGAGAGAGCAAAGCTATCTACTAACATGAAGATAGTCTATAGAGAAAAACGAGGCAATGGATTAGAGAGCTATAGATACCCATGTAGACATACCATTGAAGTGGTTTACTATTAATCTAGTCTATTGTTGAGGTGTACATGTTTTATAGATAGCACCTTACTTTACTATTGCGGGTGCTCTAAATCTAAGCTCCCTGAACCTTCTTCCATGGCTCCAAACTGTGTGGTTGAAGATTGTAGCATACTTGAATTAATGAAGTTAAAGGTTGTCGCATTAATGAAGTGTAAGATGCCTGTAACACCCAACGACCATCTGCTTTACATTCGCAACTCCGATCCAGTGGCTGGATGCTGCGCACCAACAAAGTCGCTGCAATCCCTGGACCCATATGCTTCAT…	GTATAGTTTTGTTACAGAAAGGCCACCACAGAAACCCTCTTGAAACTGCGTTTCAATAGGGAAGTTAATCTGGTTTCTATCAAAATCCCGCAAAATCCCTAGTGAAATTGACATTGAGAATATCTTTAAGAACAGCTCAGCACCCTTTACACTAATTCTAAAGTCGCCTCTCACTGTCTCACATAAATCTAAGCTCCCTGAACCTTCTTCCATGGCTCCAAACTGTGTGGTTGAAGATTGTAGCATACTTGAATTAATGAAGTTAAAGGTTGTCGCATTAATGAAGTGTAAGATGCCTGTAACACCCAACGACCATCTGCTTTACATTCGCAACTCCGATCCAGTGGCTGGATGCTGCGCACCAACAAAGTCGCTGCAATCCCTGGACCCATATGCTTC…
190	Chr01	6044971	5890541	CCAAAATTACATATATAAGTATTAAAATTATATATGTAAGTCA	C	42	AAATATTTTAACAGAGACGATACGAATATGACGGGTGAGGATTGATCCTCTACCATAATGTCACTACCATTACAATCACTAACATATGGGTTTCATTCTTTTATTACCCTATATGTCAATGACTGTAATAATAGTGCTATTATGATAAAGGATGTCAACCTGAATACGACCGATCCTCTCTAACTGTGCGGCACAATGTGCTTCGTCCTCCTCTTCACCCGCTTGGTTTCTTCACAGTCCGGAGCCCGAGAGCCATCGCCATATAAATACAGTCTTCATGGTACAGACGGATGCTAGAAGGCCATGTCACTGCTGGGCACAGGTGGATAATGACACCGGCCGGGTCTCTGTTTGTTTTGCGGAAAATGTATGGAAGGAAAAATAATGGGAGTAGCTATA…	AAATATTTTAACAGAGACGATACGAATATGACGGGTGAGGATTGATCCTCTACCATAATGTCACTACCATTACAATCACTAACATATGGGTTTCATTCTTCTATTACCCCATATGTCAGTGACTGTAATAATAGTGCTATTATGATAGAGGATATCAACCTGAATACGACCGATCCTCTCTAACTGTGCGGCACAATGTGCTTCGTCCTCCTCTTCACCCGCTTGGTTTCTTCACAGTCCGGAGCCCGAGAGCCATCGCCATATAAATACAGTCTTCATGGTACAGACGGATGCTAGAAGGCCATGTCACTGCTGGGCACAGGTGGATAATGACACCGGCCGGGTCTCTGTTTGTTTTGCGGAAAATGTATGGAAGGAAAAATAATGGGAGTAGCTATA…
191	Chr01	6060681	5907024	TAGCCAAGATTAATTTCTCTGGTGCAATCACATGCAACATTCA	T	42	CATAAAAAACCTGAAAGTTTTGCATATTCCTAAAAATCTAGTATAAAATAAATACTCCCTCCGTCCCAAAATATAAGCATTTTTGGACTTCGACACAGTCTTTGAGATGTTATTTTGACCAACAATATCTATAAAAATAAAATATTTTAAATAAAAAGAGTTGCATATTATAATATTTTGATTAATGATAAATCTAATAATATCAATTTTACATGTTTGATTTTATTTCTATTAATTTACAAAGTTAAAAATGGTTGACTTGGCACTATACTAAAAATTCTTATATTTTGGGACGGAGGGAGTATTCCAAAAAGACAGTTTGAGGTGAAACAAAGTTTGGTCCATTGTTTTATACTCCCTTCATTTCAATTTGTTCATCACCTAAGAATTTTAAGGTCT…	CATAAAAAACCTGAAAGTTTTGCATATTCCTAAAAATCTAGTATAAAATAAATACTCCCTCCGTTTCAAAATATAAGCATTTTTGGACTTCGACACAGTCTTTGAGATGTTATTTTGACCAACAATATCTATAAAAATAAAATATTTTAAATAAAAAGAGTTGCATATTATAATATTTTGATTAATGATAAATCTAATAATATCAATTTTACATGTTTGATTTTATTTCTATTAATTTACAAAGTTAAAAATGGTTGACTTGGCACTATACTAAAAATTCTTATATTTTGGGACGGAGAGAGTATTCCAAAAAGACAGTTTGAGGTGGAACAAAGTTTGGTCCATTGTTTTATACTCCCTTCATTTCAATTTATTCATCACCTAAGAATTGTAAGGTCT…
192	Chr01	6079436	5924308	ACATTATACTAAAATGAGAAACATTCTAAATG	A	31	GGGCCTTACCCTTGTGGATAGGGGGGGATTTCACGGGGAAATTGTCACTTCGGGACGGGAATCCGCGCAGGTAGAAGTAGGTGGCGACAACGACGGGGAAGTGGCACACGCTCGTGAGTAGCGACGACCCGCACTACTCCGCTGCGACGCCGGCGAGCAGTTCATTTCAACCTGTACTACACGAATCTGTTTGATGGTCACAATTCACAAACTACTTGCTTGATTGTTGATACTACTCCGTAGTACTATAACTACTGGATCGTCCTGTAACTAATCATGTTCCATGATTTGCAAGTGCGAATGTGTACTGTGTATAACACATGGTGGCCATTGTCTTTTTGGCCGTTGTGTTTTTAATTGTTTCACCTGATCCTCGTGACAAAAATACTCACAGCAAGC…	TGGCGGCGGCTGCACGGGCCTTACCCTTGTGGATAGGGGGGGATTTCACGGGGAAATTGTCACTTCGGGACGGGAATCCGCGCAGGTAGAAGTAGGTGGCGACAACGACGGGGAAGTGGCACACGCTCGTGAGTAGCGACCCGCACTACTCCGCTGCGACGCCGGCGAGCAGTTCATTTCAACCTGTACTACACGAATCTGTTTGATGGTCACAATTCACAAACTACTTGCTTGATTGTTGATACTACTCCGTAGTACTATAACTACTGGATCGTCCTGTAACTAATCATGTTCCATGATTTGCAAGTGCGAATGTGTACTGTGTATAACACATGGTGGCCATTGTCTTTTTGGCCGTTGTGTTTTTAATTGTTTCACCTGATCCTCGTGACAAAAATA…
193	Chr01	6082017	5926488	G	GTCGGGTCTGGGAGAGTCAGGACGTTACAATT	31	CGTTACAATTTGGGAACAATTTCCCGATCGGTGACATTGTTCCCGAGTGCGCACAAGTAAGGACAAAGTGTGCAGAAAAGACTTATGTTGGTTTGCGATTACTGTCGCTGATCGCACAAGTGAGGACAAAGTGTGCAGAAAAGACTTGTGTTGGTTTGCGATTACTGTCGCTGGTCGCACAAGTGAGGACAAAGTGTGCAGAAAAGACTTGTGTTGGTTTGCGATTACTGTCGCTGGTCGGGTCTGGGAGAGTCGGGACGTTACAATTTTCGGAAGGCCTGGCACTCGGGAACAATTTCCCGAGTGCGCACGAGTGAGGACAAAGTGTGCAGAAAAGACTTGTGTTGGTTTGCGATTACTGTCGCTGGTCAGGCTTGGGAGAGTCGGGACGTTACAATT…	GTGCAGAAAAGACTTGGGTGTGTTCAGTAGCGATTACTGTCGCTGGTTCGGAAGGCCTGGAACTCGGGAACAATTTCCCGATCGTAAGGCCTAGATTGTGTGCAGAAAAGACTTGGGTGTGTTCAGTAGCGATTACTGTCGCTGGTTCGGAAGGCCTGGCACTCGGGAACAATTTCCCGATCGTAAGGCCTAGATTTCCCGAGTGCGCACGAGTACTTGGGTGTGTTCAGTAGCGATTACTGTCGCTGGTTTGGAAGGCCTGGCACTCGGGAACAATTTCCCGAGTGCGCACAAGTGAGGACAAAGTGTGCAGAAAAGACTTAAGTGTGCAGAAAAGACTTGTGTTGGTTTACGATTACTGTCGCTGGTCAGGCCTGGGAGAGTCGGGACGTTACAATT…
194	Chr01	6085866	5931036	A	AGTCTATCTATCTATCTATCTATCTATCTATCTATCTATCTATCT	44	CAATTTGCATCATGAACTTAACGTGCGTGAGATCCGGGGTCTGCGTGATGGCCGATCACTGACAGTACCCGTGAGGAGACTGCAGCTCCGCACGTGAGATGTGCCCAGGCGCAGCAGATGGGTCGGGGTCCCTTGGTGAGGATTGTTTCATTGTTTGCATGCATCCATGCGTGACGCGTGAATATTCTGTTCATCATGCCGATCCAAACGTTGTGCGCACATTGTTCGTTCGCCAGTCAGTGTTAGATAAGAAAGCCGTCGTGAATATAATTGCCCGTAGCCAAGATGGATTAGAGGACTACTGGGATCGTCTGCAGCATTACACGCAGGCACTGTATAGTCTATAGCTCATTGTAGAGGCATTACTGTGGCAAGGAAATTGCATGGCGTCTCATTGTA…	CAATTTGCATCATGAACTTAACGTGCGTGAGATCCGGGGTCTGCGTGATGGCCGGTCACTGACAGTACCCGTGAGGAGACTGCAGCTCCGCACGTGATATGTGCCCAGGCGCAGCAGATGGGTCGGGGTCCCTTGGTGAGGATTGTTTCATTGTTTGCATGCATCCATGCGTGACGCGTGAATATTCTGTTCATCATGCCGATCCAAACGTTGTGCGCACATTGTTCGTTCGCCAGTCAGTGTTAGATAAGAAAGCCGTCGTGAATATAATTGCCCGTAGCCAAGATGGATTAGAGGACTACTGGGATCGTCTGCAGCATTACACGCAGGCACTGTATAGTCTATAGCTCATTGTAGAGGCATTACTGTGGCAAGGAAATTGCATGGCGTCTCATTGTA…
195	Chr01	6108394	5954084	G	GGCAATGAGCATTCCCGGTTTTGACGCTGCCCCGCGCCGGACGCC	44	CCTTATATAAAAACAATGTTTCAGCAAATAGCGAAAGAATGTTTCAGTTCACTGCAACATTAGATCTATACACAGTGAAACATTGTGAGTACACTAGGTGAAACATTTTTTGGTGGAACAAAAAATAAACCAAATTCCCTTAATAGGGGGTTTCCAAAATATATGGGTTTTTTTGTTGCAATAGAATGTTTCGTTCACTGCAACATTAGATTTATATATAGTGAAACATTGTGAGTACACTAGGTGAAACATTTTTTATAGAACAAAAAATAAACCAAATTCCCTTAATAGAGAATTTTCAAAATATGTGAGTTTTTATTGTAAAAGAGTATTTTAATTCACTGCAACATTATATCTATAAATAGTGAAACATTGTAAATACACTAGTTGAAACATCTT…	ACCTTATATAAAAACAATGTTTCAGCAAATAGCGAAAGAATGTTTCAGTTCAATGCAACATTAGATCTATACACAGTGAAACATTGTGAGTATACTAGGTGAAACATTTTTCAGTGGAACAAAAAATAAACCAAATTCCCTTAATAAGGGGTTTCCAAAATATATGGGTTTTTTTGTTGCAATAGAATGTTTCGTTCACTGCAACATTAGATTTATATATAGTGAAACATTGTGAGTACACTAGGTGAAACATTTTTTATAGAACAAAAAATAAACCAAATTTCCTTAATAGAGAATTTTCAAAATATGTGAGTTTTTATTGTAAAAGAGTATTTTAGTTCACTGCAACATTAAATCTATAAATAGTGAAATATTGTAAATACACTAGGTGAAACATCT…
196	Chr01	6125265	5971008	G	GTTGGAGGGTTTGCTCCGTTGTTACATACTAA	31	CATCCTTCTTCTGTGCTATTTAGGTGAGTTTAATTACAATATTCTATTTTATTGTAATGGGTTTTCTTGTTATGTAGTTTTTCTATAGACTTCTTGACATCTTCCTTGCATTTTAGGGTTAATCCAAAGTGGGTCATCTACCAGTCTCTAGTTTCAACTGATAAGCACTATATGCGTAATGTTATTGCCATTGAACCATCATGGCTTACGGAAGCTGCACCACATTTTTATCAGTTCCGGACACCCAATCCTGCCCTTCACTAACTATATGATGGTAATTTTATTTCTTTCTGTTTACTCATTATCAACCGTCTTCCATAGTTACAATTTTGTGAAGTTTATCCATGTTGATCGCAGAAAACTGCAACTTGATCTTTGCACCTTTTTGCCCTTTTTGGC…	CATCCTTCTTCTGTGCTATTTAGGTGAGTTTAATTACAATATTCTATTTTATTGTAATGGGTTTTCTTGTTATGTAGTTTTTCTATAGACTTCTTGACATCTTCCTTGCATTTTAGGGTTAATCCAAAGTGGGTCATCTACCAGTCTCTAGTTTCAACTGATAAGCACTATATGCGTAATGTTATTGCCATTGAACCATCATGGCTTACGGAAGCTGCACCACATTTTTATCAGTTCCGGACACCCAATCCTGCCCTTCACTAACTATATGATGGTAAATTTATTTCTTTCTGTTTACTCATTATCAACCGTCTTCCGTAGTTACAATTTTGTGAAGTTTATCCATGTTGATCGCAGAAAACTGCAACTTGATCTTTGCACCTTTTTGCCCTTTTTGGC…
197	Chr01	6157025	6002806	TCTCTCTCTCTCTCTCTCTCTCTCTCTCTCTCTCTCTCTCTCTCTCT	T	46	ATCGATACAACGTGCTAGGATAAACATCGCCGGTGTGTCGACCATTTTAATGGCAATGGAATTCTTTTCTTTGCCTTTGCAAACCGATCAGTTTGGTTCGTGACAACGGACAAGACATCGATCAACGACTCGACTGAGATCAACTTGCTACAACGGAGGCGAACAGGTTGTGTGCATTTGCTACCCCATTGCACTGTTAGATAGATCCAGATCGAACCGACTTCGATCAGATCACTACAGTAATTTGTTATATTGGTGCTTTTCTTCAGTGCACATTAAAATCAGTCACTGAATTGTTTGCACCACTTAAGCAAACTCAATTTACTGTTGGTTATAGCGATTTTATGCTATAATTCGATATTGCGATCCTCACTAAACTGGATAGGCTAAAGAAAATAT…	ATCGATACAACGTGCTAGGATAAACATCGCCGGTGTGTCGACCATTTTAATGGCAATGGAATTCTTTTCTTTGCCTTTGCAAACCGATCAGTTTGGTTCGTGACAACGGACAAGACATCGATCAACGACTCGACTGAGATCAACTTGCTACAACGGAGGCGAACAGGTTGTGTGCATTTGCCACCCCATTGCACTGTTAGATAGATCCAGATCGAACCGACTTCGATCAGATCACTACAGTAATTTGTTATATTGGTGCTTTTCTTCAGTGCACATTAAAATCAGTCACTGAATTGTTTGCACCACTTAAGCAAACTCAATTTACTGTTGGTTATAGCGATTTTATGCTATAATGCGATATTGCGATCCTCACTAAACTGGATAGGCTAAAGAAAATAT…
200	Chr01	6250751	6083206	G	GTTTGACATTAGCATTGCAATGCATTATTAT	30	CCGTCCCAAAATATAGCTACCTTTAGCATTCAAATTCGTCCCAAAATATATCTATCTTTAGAGATTTTAGTGCTATAATGCCCAAAATACCCCTGTCTCCTCCTTGGGCCCCACATAGGACCACATCACCTTCCTGGGCTGCATCCTCCCACCGGATTTGTGTCTCCTGGGATGGAGGGGGTAATATGATATCCTATTTGTGTTCTACCTTTGCTTTTGTACAAAGCTTTAGTGTTGTAACTTTTAAAGCATCTACCTGACAATCTTATGAAGGATAGTTTTTTTTTTTTTGAAACATTACAAAAGATAGTACTTGTGCTAATAAATTAGCAGCTAACACGTTCAAGCCAGAATAGATCTACTGTATCATATTTTACTACTCAGCTACTAATATTATAA…	GTCCCAAAATATAGCTACCTTTAGCATTCAAATTCGTCCCAAAATATATCTATCTTTAGAGATTTTAGTGCTATAATGCCCAAAATACCCCTGTCTCCTCCTTGGGCCCCACATAGGACCACATCACCTTCCTGGGCTGCATCCTCCCACCGGATTTGTGTCTCCTGGGATGGAGGGGGTAATATGATATCCTATTTGTGTTCTACCTTTGCTTTTGTACAAAGCTTTAGTGTTGTAACTTTTAAAGCATCTACCTGACAATCTTATGAAGGATAGTTTTTTTTTTTTTTTGAAACATTACAAAGGATAGTACTTGTGCTAATAAATTAGCAGCTAACACGTTCAAGCCAGAATAGATCTACTGTATCATATTTTACTACTCAGCTACTAATATTATAA…
201	Chr01	6274520	6105732	CTCTCTCTCTCTCTCTCTCTCTCTCTCTCTC	C	30	ACAAAAGTTCCATGTCTGGTCCTGAACATTTTTTCTGCAGAAAGTCCGTAGGGACGTCAAGAACGCAACTATATAGCGACAAGATCGATTCTTGCGGTTGGTGTTTGTGTTTGCCGCCAGCCGTCGAAGCCTCCCTTTGATTCTTCTCCTGACAGCGACAGAGGAAGCACATCGATCGCGGCAACAATTAACTACAGTTCCTTCAATTGGCGTGGTCCAATGATCAGGCCATTGGATCGAATAGCAGCAGTTTCTGCAGAAATTTGCTTCTTTGTTCTCTTGTGCTGTTACTGTCTGGTTCAGTGGCCACTGATGCTGAAGCTTCACCGCGCCAGTGTTATCAACTTATGATTCAGATGTCAGAACCAAACAGATTACCGCCGCATCAGTTGTTGTCAG…	ACAAATGTTCCATGTCTGGTCCTGAACATTTTTTCTGCAGAAAGTCCGTAGGGACGTCAAGAACGCAACTATATAGCGACAAGATCGATTCTTGCGGTTGGTGTTTGTGTTTGCCGCCAGCCGTCGAAGCCTCCCTTTGATTCTTCTCCTGACAGCGACAGAGGAAGCACATCGATCGCGGCAACAATTAACTACAGTTCCTTCAATTGGCGTGGTCCAATGATCAGGCCATTGGATCGAATAGCAGCAGTTTCTGCAGAAATTTGCTTCTTTGTTCTCTTGTGCTGTTACTGTCTGGTTCAGTGGCCACTGATGCTGAAGCTTCACCGCGCCAGTGTTATCAACTTATGATTCAGATGTCAGAACCAAACAGATTACCGCCGCATCAGTTGTTGTCAG…
204	Chr01	6302798	6133907	A	ATTTCATCTGAGGTCCCTTAACTTGTCAACGAATCCTATTTCC	42	ATAGCATATCCATATGATGATTTTGGTGGACCCAAGGACTATTATAGACCTTATGATAAAGGTTAAGGATTTCTTTGGACCATTTAAAATGTTAGGGACTAAACTGATCATACAGAGAAACTTTAGGGACTAAAGTAGCTATTCTCTCTATTTTTTTTGGTAAAGTTGCTAAAAAAATGTCTACGTTTAGTTTGTTGCTAAATTTGGTGAATACATAAGAATTCCTGCCAAAATTTTAGCAATATTGTCAACTTGCCAAAATTTTGGTTTTGGTAAAAGTTTATTTTGGCTACAATGAACAGGCCCTATATTTTGCAGTCCACCCAATCTCTGATTTTGTTTTCTCATTACCAACCAAAAGTAAAGAGAATGTTGGCCCACAGGTGGATAGGCCTGAAT…	ACATGGCATATCCATATGATGATTTTGGTGGACCTGAGGACTATTCTAGACCTTATGATAAAGGTTAAGGATTTCTTTGGACCATTTAAAATGTTAGGGACTAAACTGATCCTAGAGAAACTTTAGGGACTAAAGTAGCTATTCTCCCTATTTTTTTTGGTAAAGTTACTAAAAAAATGTCTACGTTTAGTTTGTTGCTAAATTTGGTGAATACATAAGAATTCCTGCCAAAATTTTAGCAATATTGTCAACTTGCCAAAATTTTGGTTTTGGTAAAAGTTTATTTTGGCTACAATGAACAGGCCCTATATTTTGCAGTCCACCCAATCTCTGATTTTGTTTTCTCATTACCAACCAAAAGTAAAGAGAATGTTGGCCCACACGTGGATAGGCCTGAAT…
205	Chr01	6315763	6146819	C	CCGGACGAATTACCCCTCCCCCCCTCAACTCAACT	34	ATCTTATCTCCCGTTCATCGGAAGAAAATAAAACATGCATACCGACTTACGATAAAAGCGATTAAGTAAAAAAAAAGCATACGTAATGTTGGTACGTAGCGCCATTGAAGAAAAAATCGATGGTCCATAAAATAGGATTTTCTACTATTTTAAAATAAAATATATTACTCTATAAACTGATGCAAATATGCGTAGTTAAACTAGATCATCTACAATAGAAAAATCAAATATCCTATCAATGCTCTTTAAATGTCCTATATTTAAATTATTTTAGAATCATGGATCTAATTTGTGATCCAGTTGGATTCCTCTAATTAAATAAACTATTGATGTCTATGTTCCTAAATACATCGTAATACATGATGTCGACATGTAACAAAAAAAATGTTATGATAATAT…	CTTATCTCCTGTTCATCGGAAGAAAATAAAACATGCATACCGACTTACGATAAAAGCGATTAAGTAAAAAAAAAGCATACGTAATGTTGGTACGTAGCGCCATTGAAGAAAAAAATCGATGGTCCATAAAATAGGATTTTCTACTATTTTAAAATAAAATATATTACTCTATAAACTGATGCAAATATGCGTAGTTAAACTAGATCATCTACAATAGAAAAATCAAATATCCTATCAATGCTCTTTAAATGTCCTATATTTAAATTATTTTAGAATCATGGATCTAATTTGTGATCCAGTTGGATTCCTCTAATTAAATAAACTATTGATGTCTATGTTCCTAAATATATCATAATACATGATGTCGACATATAACAAAAAAAAATGTTATGATAATAT…
206	Chr01	6324720	6155823	GTACCATTCACTCTTTCAGGGACAGAGCGATGCGG	G	34	CCCAGTGAATCTAACGGCTAATATTATCGGGATGAGGTGCCTCATCCTCATTTTATTTTGGGTTCACTTTTCATTAGTCTAAGATGCGTCAGTCAGGTTAGGTTAAGGGCTCGTTCATTTCAAAATAAATGCAAAAAAAAGTACATAAATATGCCATTCATTTTAAAGGAAATCCACCAAAGGAAAATTCCCTATCCCTCAACACAGGGAAAAAAAATAATCCACTCCAAAACAATATTTTCAACCCTTTGGATTGTTTGCTGAACAACCATAAGAAAGTTTCCTATGTTTTTCTACTTTAGTTTTGCATATGTATTCTGGTACTATTTGTACGCTTTTTCTATTATTATGTTTTGAAAATCCTACAACTGAACAAGCTCCTAATTATCTCTTTCACGT…	CCCAGTGAATTTAACGGCTAATATTATCGGGATGAGGTGCCTCATCCTCATTTTATTTTGGGTTCACTTTTCATTAGTCTAAGATGCGTCAGTCAGGTTAGGTTAAGGGCTCGTTCATTTCAAAATAAATGCAAAAAAAAGTACATAAATATGCCATTCATTTTAAAGGAAATCCACCAAAGGAAAATTCCCTATCCCTCAACACAGGGAAAAAAAATAATCCACTCCAACACAATATTTTCAACCCTTTGGATTGTTCGCTGAACAACCATAAGAAAGTTTCGTATGTTTTTCTACCTTAGTTTTGCATATGTATTCTGGTACTATTTGTACGCTTTTTCTATTATTATGTTTTGAAAATCCTACAACTGAACAAGCTCCTAATTATCTCTTTCACGT…
207	Chr01	6337079	6168084	CATTATCTTCACTATATCATGGTGAGATTAC	C	30	AATTAATTCTAAATCTAATGTAAGCATGGCACACCACTTACAATTATTACATACTTGCAAGTATATTAAATATCATCTTGCACACATCATTTTCACAATATTTTAAAATATATCTATACATTGTTTCTACATTACATAATTGTTGGCTAGCTATACCTAACAACTATATTTTAAGAGTATACATGATAATAAAACTAAAGTATACGTGAGATTTTGGTAAAGAGATGCATGGGGGTGTGGTTTCATCCCAAAATTTTCCAGAACAAAACTTGTTAGGTATAAAAATCAGGAACGGTTGGTAGGCTATACCTGACAACTATATTAGTATGCAGGGCATTGATACAAAGGTATACGTGAGATTGTGTTAAAGAGATGCATGGGGTGTGGTTGCATCCCAAA…	ATGCATGCCACAAGTCCACAACATCACACCACTTACAATTATTACATACTTGCAAGTATATTAAATATCATCTTGCACACATCATTTTCACAATATTTTAAAATATATCTATACATTGTTTCTACATTACATAATTGTTGGCTAGCTATACCTAACAACTATATTTTAAGAGTATACATGACAATAAAACTAAAGTATTCGTGAGATTTTGGTAAAGAGATGCATGGGGGTGTGGTTTCATCCCAAAATTTTCCAGAACAAAACTTGTTAGGTATAAAAATCAGGAACGGTTGGTAGGCTATACCTGACAACTATATTTTAAGAGTATGCAGGGCATTGATACAAAGGTATACGTGAGATTGTGTTAAAGAGATGCATGGGGTGTGGTTGCATCCCAAA…
208	Chr01	6360322	6204502	T	TATACATATATATATATATATACATATATATATATATATA	39	TTACACAAGTTGCGACTAATTACGAGACGAATATTTTAAGCCTAATTGCTCCATGATTTGATAATGTGGTGCTATGGTAAACATTTGCTAATAATGGATTAATTAGGCTTAATAAATTCGTCTCACGGTTTACTGACGGATTCTGTAATTAGTTTTTTTATTAGTGCTCGAACATCTCATGCGACACCCTATATAATACTCGATGTGATACGCCAAAACTTTACACCCCTGAATCTAAATACCCCCTTATTTTTCTTGTATAACGCTCAAGTATCGATTCATGTATAACTTGCTGGTTGTATTCTTTTGTGGCTGGCACATAAAAGGACAGACATGGGAAACGCATGTTTGATTTTTGTCGTTGCCTGCAGAAAATTGAGGCTTATATAGGATGCCAAA…	TACACAAGTTGCGACTAATTACGAGACGAATATTTTAAGCCTAATTGCTCCATGATTTGATAATATGGTGCTACGGTAAACATTTGCTAATAATGGATTAATTAGGCTTAATAAATTCGTCTCACGGTTTACTGACGGATTCTGTAATTAGTTTTTTTTATTAGTGCTCGAACATCTCATGCGACACCCTATATAATACTCGATGTGATACGCCAAAACTTTACACCCCTGAATCTAAATACCCCCTTATTTTTCTTGTATAACGCTCAAGTATCGATTCATGTATAACTTGCTGGTTGTATTCTTTTGTGGCTGGCACATAAAAGGACAGACATGGGAAACGCATGTTTGATTTTTGTCGTTGCCTGCAGAAAATTGAGGCTTATATAGGATGCCAAA…
209	Chr01	6403473	6257990	A	AGCAACGCTTGGTTGAAAGAAGAGAGCTGCCTAGTGCAATTTACATGAAACT	51	TATGGAGCTTTCTGAAGATTTACAAGAGTTCCCAATCATCCTCCAGATCATCCGAGGATGAAACTGCTTGATACCTGACATTTCCTGCTTCTGCCTGGTTCAAATTCCTCTCCTTCTTCGACCACCGGAATTTATTCGCTAAGCTTCTCATCATTTTTTTCTGCAACGAACAAGAACATCAGACGCCTTTATGACGAGCTAAACATACATCACACAGTTGTTTAGTCATATAGCCAGGGTTTACAATTTCGATTTCGGTGATTTCGGTAGTGATTTTTGGCACTTTTCGGACCGGAACTTTTTGAAATTTTGACTGAATTTGAATAAACTTTGATCAAATTCCACAAAAATTTGAGAAAATCCAAAAATTTCGGTCAGTATATTGATTTGCCGGTGGGG…	TAACAGCAGATATGGAGCTTTCTGAAGATTTACAAGAGTTCCCAATCATCCTCCAGATCATCCGAGGATGAAACTGCTTGATACCTGACATTTCCTGCTTCTGCCTGGTTCAAATTCCTCTCCTTCTTCGACCACCGGAATTTATTCGCTAAGCTTCTCATCATTTTTTTCTGCAACGAACAAGAACATCAGGCCTTTATGACGAGCTAAACATACATCACACAGTTGTTTAGTCATATAGCCAGGGTTTACAATTTCGATTTCGGTAGTGATTTTTGGCACTTTTCGGACCGGAACTTTTTGAAATTTTGACTGAATTTGAATAAACTTTGATCAAATTCCACAAAAATTTGAGAAAAATCCAAAAATTTCGGTCAGTATATTGATTTGCCGGTGGGG…
210	Chr01	6466099	6325555	ATATATATATATATATATATATATATATATATATATATA	A	38	GAAGGAGATAGTATTCAGACTTTCAGGGTGTGAGAGAGATAAGAGATTCAGTTCATTCCCATGTGTCGCAACAGTCAGATCGACAGCAACAGAAGCTGGAACAAACGTGAATGAACTTGATTATTCTAGCAATCGGACGCTGTTAAGCTCTCGTGCGAGCACTATTAAACTCAGGGAAGGAACTGTTCACATCTACTACAACTGTTCACGTCTGAGAATGAGACCAATCGGAGTCAGATTCTCTCGTCTACTCAAACTGGTATATGTATATCCATCCAATGATCTCACATCAAGTTCTGTTCAGCTATCTAACATCTCTCTCTGACCATACCTTTTTATTACAAGTTGCATTGTCACCTCAACCTCAGTGGAAAGAAAACATTTATATGAACAAAATGC…	CATAGATGAAGGAGATAGTATTCAGACTTTCAGGGTGTGAGAGAGATAAGAGATTCAGTTCATTCCCATGTGTCGCAACAGTCAGATCGACAGCAACAGAAGCTGGAACAAACGTGAATGAACTTGATTATTCTAGCAATCGGACGCTGTTAAGCTCTCGTGCGAGCACTATTAAACTCAGGGAAGGAACTGTTCACATCTACTACAACTGTTCACGTCTGAGAATGAGACCAATCGGAGTCAGATTCTCTCGTCTACTCAAACTGGTATATGTATATCCATCCAATGATCTCACATCAAGTTCTGTTCAGCTATCTAACATCTCTCTCTGACCATACCTTTTTATTACAAGTTGCATTGTCACCTCAGTGGAAAGAAAACATTTATATGAACAAAATG…
211	Chr01	6466173	6325591	TTGGCAATAAAATAGCATATCCTACCGAATAAGAA	T	34	TCAGATCGACAGCAACAGAAGCTGGAACAAACGTGAATGAACTTGATTATTCTAGCAATCGGACGCTGTTAAGCTCTCGTGCGAGCACTATTAAACTCAGGGAAGGAACTGTTCACATCTACTACAACTGTTCACGTCTGAGAATGAGACCAATCGGAGTCAGATTCTCTCGTCTACTCAAACTGGTATATGTATATCCATCCAATGATCTCACATCAAGTTCTGTTCAGCTATCTAACATCTCTCTCTGACCATACCTTTTTATTACAAGTTGCATTGTCACCTCAACCTCAGTGGAAAGAAAACATTTATATGAACAAAATGCAGGTAGGTCCGTTGGATTGAGCAATGTAGTTACCCAAGATATACATATAAATACATTGCTAGACACTAGCTAAT…	GTGAGAGAGATAAGAGATTCAGTTCATTCCCATGTGTCGCAACAGTCAGATCGACAGCAACAGAAGCTGGAACAAACGTGAATGAACTTGATTATTCTAGCAATCGGACGCTGTTAAGCTCTCGTGCGAGCACTATTAAACTCAGGGAAGGAACTGTTCACATCTACTACAACTGTTCACGTCTGAGAATGAGACCAATCGGAGTCAGATTCTCTCGTCTACTCAAACTGGTATATGTATATCCATCCAATGATCTCACATCAAGTTCTGTTCAGCTATCTAACATCTCTCTCTGACCATACCTTTTTATTACAAGTTGCATTGTCACCTCAGTGGAAAGAAAACATTTATATGAACAAAATGCAGGTAGGTCCGTTGGATTGAGCAATGTAGTTACCC…
212	Chr01	6516643	6370388	ATAAAATCAACCTAGTATCATATGTGATACGTCGTAGTATTA	A	41	ATAAAAAATAATTATTACCACATTCTTATTTGGATCATCTTAACAAATATAATACATGCACCTGATATGATTAAAGATCATGAGGGCAAAGGATTAAAAAACGAATTTAGAGGAAACAAGGGTAACAGTTAAACGTGTATGCATGTGTGTCTTGTATTACAATGTAACATAAAAAAGGTTGCGCCTATTACAATGTAAGATTTACCCCTAATACAATGTATACTTGTATGATAAATTTAATAGTTACGATGTAAGATACTAAGATATACTCCTAACAAAAAAGCGACATAAATATGTACTATGACTTATATATCTTGATCATGAAAATGCCATCAAAGCAATAGTTATATAGCTAACTTAGCTCCATAATTCTGTAGTAATAGTTTAGGCCAAGTTAAC…	ATAAAAAATAATTATTACCACATTCTTATTTGGATCATCTTAACAAATATAATAAATGCACCTGATATGATTAAAGATCATGAGGGCATTGGATTAAAAAACGAATTTAGAGGAAACAAGGGTAACAGTTAAACGTGTATGCATGTGTGTCTTGTATTACAATGTAACATAAAAAAGGTTGCGCCTATTACAATGTAAGATTTACCCCTAATACAATGTATACTTGTATGATAAATTTAATAGTTACGATGTAAGATACTAAGATATACTCCTAACAAAAAAGCGACATAAATATGTACTATGACTTATATATCTTGATCATGAAAATGCCATCAAAGCAATAGTTATATAGCTAACTTAGCTCCATAATTCTGTAGTAATAGTTTAGGCCAAGTTAAC…
214	Chr01	6582717	6422231	C	CATAAAACTACAAGTTTAGTGATAATTTAATC	31	AGAACGGTGGGATCCACCGAGGAAATACGATGCCACGAGACGGATCTCTCGCGAAAGGGATTCTCGTCGCCTCTTGGCACGTCGCGCGTCGGCGTCACGGACGGTAGCCGCCGCCTGCCGGGGAAAAACCGAAAAAGATTGTGCGCCACTGCTACACACGCTCGGTATTTTTCTCGCGCGTGTGTATCCTGTAATTGTACGCGTCTCTGTTAAGCGATCGGGCCTGTATCTGTGGGCTAAGCTACTAGTGGTGTGTTGGTGATAGGTACGCTGTCTCGCTACTATTACAGGTGGGATCTTCTGTATGTACATACTACAGTACACATGTGTTTTATTTTAAGTAAATTTCACAAACCTACGGATACTTTGATCAAATTATCACAAAACTGTAGATTTAGA…	TACGTGGCGCGAGGGGAGAGGAGGAGCGTGGCGGCCACGGGCGCCATACATTCCACCGGGGATTCTCGTCGCCTCTTGGCACGTCGCGTCGGCGTCACGGACGGTAGCCGCCGCCTGCCGGGGAAAAACCGAAAAAGATTGTGCGCCACTGCTACACACGCTCGGTATTTTTCTCGCGCGTGTGTATCCTGTAATTGTACGCGTCTCTGTTAAGCGATCGGGCCTGTATCTGTGGGCTAAGCTACTAGTGGTGTGTTGGTGATAGGTACGCTGTCTCGCTACTATTACAGGTGGGATCTTCTGTATGTATATACTACAGTACACATGTGTTTTATTTTAAGTAAATTTCACAAACCTATGGATACTTTGATCAAATTATCACAAAACTGTAGATTTAGA…
216	Chr01	6593328	6432960	TCGGCCGGCCGGCCGGCATGTATGCTGCCAATATGCCATATCTG	T	43	TCATTTATATTTATATGTATATACATACATATACCCAGCTAGCTAGCTAGCAGAGAAATGCAGAATGTTTGATTCCGATGATGGCATGCATGCAATGCAATTATGCAAATGAACACACATGGACGCACGCACGCACGCACGATCGATGCACGGATGGGGAATCTTGCACAGGGCGGGGAGAGGCGGTCAAGGGCTGGAGATAATCTCTACGCTCTCTGCTGTCTGCAGTCTGCGCGCGCGCGCGCACACACACACACCTGCAGATACTATGCGTTCATGTCGTGTTGGCTGATCTGATCAGAATCACGCAGTACGCCGGCCGGCCGGCCGGCTGGCCCGGATCATCAGCGATGGGACGGCGTCGCAGAGGCTGCGTGCGTGCATGCATGCGATATCAGC…	GCAGAATGTTTGATTCCGATGATGGCATGCATGCAATGCAATTATGCAAATGAACACACATGGACGCACGCACGCACGCACGATCGATGCACGGATGGGGAATCTTGCACAGGGCGGGGAGAGGCGGTCAAGGGCTGGAGATAATCTCTGCGCTCTCTGCTGTCTGCAGTCTGCGCGCGCGCGCGCGCACACACACACCTGCAGATACTATGCGAGAGATTCAGAGAGATTCAGAGATTGGTTGGGCGGAGGTCGGCCGGGGTAGTACATGCGTTCATGTCGTGTTGGCTGATCTGATCAGAATCACGCAGTACGCCGGCCGGCCGGCCGGCTGGCCCGGATCATCAGCGATGGGACGGCGTCGCAGAGGCTGCGTGCGTGCATGCATGCGATATCAGC…
217	Chr01	6606384	6445961	AAAAAATCTCTGCTGGCTGCAGCCTTATGAG	A	30	TATGTCTTGAGATTAGTGAACTCACACATAAGTGTTTTGTTGTCAGTATGTTGCACATCAATGAAAGGGTAATTAGCCCTAAATGCAACGCACACATGTATACCCTATTTTTATTCTTATGTGTACCTTCAAAGACTAGACTAATATATATCTTATGATTGACGAAGTTACCATGAACGTCTCATCGTTAACTTATATGTTGCCTACCACTAAACAAATAATTAGCTTTAATTCAAGTTAGAAGAGTATGTTCCATTAACCACAAAGAATCTAACCAGCTGAATTCCACTACTACGAAAACTATCTTTCGTGGCGGTCATTTTCGGTTTTTGCTGGCGGAATTTAGAGCCGCCACAAACCAAAGGCCAGTGAAAATCAAGATATTCGCTGACGATTATC…	ATATGTCTTGAGATTAGTGAACTCACACATAAGTGTTTTGTTGTCAGTATGTTGCACATCAATGAAAGGGTAATTAGCCCTAAATGCAACGCGCACATGTATACCCTATTTTTATTCTTATGTGTACCTTCAAAGACTAGACTAATATATATCTTATGATTGACGAAGTTACCATGAACGTCTCATCGTTAACTTATATGTTGCCTACCACTAAACAAATAATTAGCTCTAATTCAAGTTAGAAGAGTATGTTCCATTAACCACAAAGAATCTAACCAGCTGAATTCCACTACTACGAAAACTATCTTTCGTGGCGGTCATTTTCAGTTTTTGCTGGCGGAATTTAGAGCCGCCACAAACCAAAGGCCAGTGAAAATCAAGATATTCGCTGACGATTAT…
218	Chr01	6609199	6448753	TACCAGAAAGAACACAAAATAAAGAATAAAA	T	30	ACACCAGCGGATGGTGGTGATTGTGGCGGCGGCAGAGGTAGTGGGGATGGGTGAGGAGTAGGGGAGCGGGCGCAAGAGGAGGAATGGCCTGGAGGAGGGCGACGAGAAGATAGGTGGAAGGAAGAGGAGAGAGAGGAAGGAGAGAAAAAGATGTTGACATGTGAGGATCCAGGTCCTTTAACCAGTAGTGTATCTAGGATGAAAATAGAGAGGGTGCCTTGTTCGAATGGGAATTTCGGATGAGCAATCATCTAGCTTACCAGAATTCAGACAAGCCTCGTAATTAACGTATAATTAGTTAAGTGTTCACTCTTATAAACTTTAAATTTTGATTTAATTGAAATTTGAAGAAACTTCTCTATAATAAGTTTTTTGAAAAATCACAATGTTTAATGGTTT…	ATGGTGGTGATTGTGGCGGCGGCAGAGGTAGTGGGGATGGGTGAGGAGTAGGGGAGCGGGCGCAAGAGGAGGAATGGCCTGGAGGAGGGCGACGAGAAGGTAGGTGGAAGGAAGAGGAGAGAGAGGAAGAGGAGAGAAAAAGATGTTGACATGTGAGGATCCAGGTCCTTTAACCAGTAGTGTATCTAGGATGAAAATAGAGAGGGTGCCTTGTTCGAATGGGAATTTCGGACGAGCAATCATCTAGCTTATCAGAATTCAGACAAGCCTCTTAATTAACGTATAATTAGTTAAGTGTTCACTCTTATAAACTTTAAATTTTGATTTAATTGAATTTTGAAGAAACTTCTCTATAATAAGTTTTTTGAAAAATCACAATGTTTAATGGTTTGACAAAGA…
219	Chr01	6620361	6459774	T	TTGATTTAAAAAACTTAAGGTAAATTATTATG	31	CAACAATTGGAATATTCTTTATGAATATAATGAAAAAATTGTATCAATTGTTCCACAGATTTATATATACATGACCTCTGTTTGCTTATTTACCTTGATGAGCTAAATAAAGTATACGTCATATATCTGAATTGGGAATAAATCAATCATCGTGATATAAGGAAGCATTGAAATCGTGAGAGAATCATTTCCTCCATTAGCTAAACAAAAATTTGTGAGAACCATTTCCTCCATTAGCTACTTAAAGAGGCCAACAGAGCATGCATACTCAATTCACTTCAAATACACCGAAATAGGCACTGGCAGAATATGGAGGAACAAATCCCTTGTACTTGGTAGCACCAATAGAAAAATCTCTTCATAGAAGTAGCACCAGCAGCTTGACGAAATATTATTATC…	AATTGGAATATTCTTTATGAATATAATGAAAAAATTGTATCAATTGTTCCACAGATTTATATATACATGACCTCTAATTGTTTGCTTATTTACCTTGATGAGCTAAATAAAGTATACGTCATATATCTGAATTGGGAATAAATCAATCATCGTGATATAAGGAAGCATTGAAATCGTGAGAGAATCATTTCCTCCATTAGCTAAACAAAAATTTGTGAGAACCATTTCCTCCATTAGCTACTTAAAGAGGCCAACAGAGCATGCATACTCAATTCACTTCAAATACACCGAAATAGGCACTGGCAGAATATGGAGGAACAAATCCCTTGTACTTGGTAGCACCAATAGAAAAATCTCTTCATAGAAGTAGCACCAGCAGCTTGACGAAATATTGTTATC…
220	Chr01	6631804	6471275	G	GGGTCCACACTACTCTGACAATCGCATCGTCACCTTGTTTTGTG	43	CGCAAATAATCTGGTTCTTCTTGTGGATAACAGCTATACTCATGTTGGATTGTATTGTGGGGAATGAGAAGATGTTACAACCAAGCACATGGGTTGTGTAAATGTGTCATGTGTTTTACCCTGGTCTCTCTAATCCCACGGAAAGTCTTTTATCCTTATATATATACATATGATACATGGGAAAAATGCATGAACAATGCCACCCTTTGCATGTGTCATGTGCTTACTCTATCCAGTCTACTTCATCTTTTGTCATATTGCCGGGCTTGCTGCTCTCGGACGTCTTCTGTTATTTCACGTCTCGAACTGCGTTAGACATGATACCTGGTATGGGCACGCTGGATCAACTACTTTAATAGAATGACTTGCGATAGACACACATTTAATATGGGATGACTA…	ATAACAGCTATACTCATGTTGGATTGTATTGTGGGGAATGAGAAGATGTTACAACCAAGCACATGGGTTATGTAAATGTGTCATGTGTTTTACCCTGGTCTCTCTAATCCCACGGAAAGTCTTTTATCCTTATATATATATATATATATATATATATATATATATACATATGATACATGGGAAAAATGCATGAACAATGCCACCCTTTGCATGTGTCATGTGCTTACTCTATCCAGTCTACTTCATCTTTTGTCATATTGCCGGGCTTGCCGCTCTCGGACGTCTTCTGTTATTTCACGTCTCGAACTGCGTTAGACACGATACCTGGTATGGGCACGCTGGATCAACTACTTTAATAGAATGACTTGCGATAGACACACATTTAATATGGGATGACTA…
221	Chr01	6640681	6480249	TCTCTCTCTCTCTCTCTCTCTCTCTCTCTCT	T	30	TGGTTAATGCAGTGATTGGCTGAGTACTAGGCTAAGCCATCAGTCATCACTGGGTGATGGACTGATGGCTCATCAAATTTTCCATTACTGATGGACTGACAGTAATGCCTCCTAATTGCAATGCTGGAGTAGCTGTCATTCTGTCAACGAGAGAGAAAAGCAACGTGTAACAAACTCGATGCTTAGGTGTTAAGAGTTTAAGGCCGGACAGTGCAAAACTGCAAATGTGTGATTAAACCTTTGCAGAACCGGATAGTAGTTTCAGCTCCACATCATACTGACACAACGAGAGTGGCAGCAATCCTTTGCAAATGCTAGATGCTGGCGGGTAGGCAGGTTTCTGAATCTTTTTAGGGACAACCGAATTGCAAATGACAAGTATCTGATCACACCATGGTG…	TGGTTAATGCAGTGATTGGCTGAGTACTAGGCTAAGCCATCAGTCATCACTGGGTGATAGACTGATGGCTCATCAAATTTTCCATTACTGATGGACTGACAGTAATGCCTCCTAATTGCAATGCTGGAGTAGCTGTCATTCTGTCAACGAGAGAGAAAAGCAACGTGTAACAAACTCGATGCTTAGTTGTTAAGAGTTTAAGGCCGGACAGTGCAAAACTGCAAATGTGTGATTAAACCTTTGCAGAACCGGATAGTAGTTTCAGCTCCACATCATACTGACACAACGAGAGTGGCAGCAATCCTTTGCAAATGCTAGATGCTGGCGGGTAGGCAGGTTTCTGAATCTTTTTAGGGACAACCGAATTGCAAATGACAAGTATCTGATCACACCATGGTG…
222	Chr01	6676206	6517153	AACCAATAGGAATCACTAAAGGATTTACATC	A	30	AATGTTTGACTTTTCGCAATGCTAAAAATACTTATATTTTGGGACATTTTGGGACGGAGGGAATACAAATCCCTACTCATGAAAGACTACCAATCAATGTAGAGTAGCTTTACAACATGTCTTCATAGAAATATAGGATGCTCATGAAAATAGAACATTATTAGGTCAGCATATAGAGTTCGAGATAAACGGACATATATAATTTCTTGTGGTAATAATTAGTACATCTAAACGAAATATTATTACAACATTGTTGGAACAATCTCTGTTGAACATCACAAAGAAATTAATGTTATACAACTTTAAACAGAGCATCACAAATAATATTACCCCTAAAATAATTATATAGAATTAATGTAAAAAAACAATGACTTCAAATTTCCATTTTACAGATTTGTA…	AATGTTTGACTTTTCGCAATGCTAAAAATACTTATATTTTAGGACATTTTGGGACGGAGGAATACAAATCCCTACTCATGAAAGACTACCAATCAATGTAGAGTAGCTTTACAACATGTCTTCATAGAAATATAGGATGCTCATGAAAATAGAACATTATTAGGTCAGCATATAGAGTTCGAGATAAACGGACATATATAATTTCTTGTGGTAATAATTAGTACATCTAAACGAAATATTATTACAACATTGTTGGAACAATCTCTGTTGAACATCACAAAGAAATTAATGTTATACAACTTTAAACAGAGCATCACAAATAATATTACCCCTAAAATAATTATATAGAATTAATGTAAAAAAAACAATGACTTCAAATTTCCATTTTACAGATTTGTA…
223	Chr01	6714153	6558769	T	TTCTTTAGGAGCATTAAGTTGGGATTTGTAT	30	ATTGCAGACTTCGGTATGGCAAAGCTTCTTGGTCGAGATTTCAGCAGGGCACTGACAACAATGCGAGGGACTATAGGATATCTTGCACCAGAGTGGATCTCAGGGTTGCCCATTACACACAAGGCAGATGTTTACAGCTATGGAATGATGCTTCTTGAAATCATATCAGGGCGAAGGAACTCGGAGAAGATCAAGGAAGGGAGGCACACTTACTTTCCTATCTATGCTGCATGTAAGGTGAATGAAGGTGATGTCATGTGCCTGTTGGATAGGAGGTTGGATGGAAATGCTGATGCAGAGCAACTGGAGAAAGCTTGCAGGATTGCATGCTGGTGCATTCAGGATGCTGAGGATCACAGGCCAATGATGGGGCAAGTCGTTCACATGCTGGAGGGTGTT…	ATTGCAGACTTCGGTATGGCAAAGCTTCTTGGTCGAGATTTCAGCAGGGCACTGACAACAATGCGAGGGACTATAGGATATCTTGCACCAGAGTGGATCTCAGGGTTGCCCATTACACACAAGGCAGATGTTTACAGCTATGGAATGATGCTTCTTGAAATCATATCAGGGCGAAGGAACTCGGAGAAGATCAAGGAAGGGAGGCACACTTACTTTCCTATCTATGCTGCATGTAAGGTGAATGAAGGTGATGTCATGTGCCTGTTGGATAGGAGGTTGGATGGAAATGCTGATGCAGAGCAACTGGAGAAAGCTTGCAGGATTGCATGCTGGTGCATTCAGGATGCTGAGGATCACAGGCCAATGATGGGGCAAGTCGTTCACATGCTGGAGGGTGTT…
224	Chr01	6720179	6565028	C	CTAAGGTTTGGCACTGCTAACAAAAGGGGACATA	33	GGGGGAAGATGATCGGACCGACGAAGTCGACGACGAGGCGGCCGTCGCAGTTGCGGCCGGTGGGGTGGCCGAAGAAGGTGGAGCCGTACGGAGGGCGGGTGACGGGGTCGAAGACGGAGTACCAGCCGAAGACGACGGGGTTGTTGCCCGTGTCGGCGAAGGAGTCGCCGAAGCTGAAGATGGCGTCGTAGCGCCGAACGGAGAGGGAGGAGGCGCCGGCGCCGGCGCCGGCGGCATGCAGCGACGACAGAGAGGAGAAGAGAGACGACGGCGGAGAGCCATAACATGGTCATATTTCGTGTTCTGCTCGATGCGGCCTGTCGGTAACTCGGTACGTGTGGACAGATTATTGGAGGAACACTATAACAAAATAGGGACATTATGACTCCTTCCCTCTTT…	CGCGGGAGAAGATGATCGGACCGACGAAGTCGACGACGAGGCGGCCGTCGCAGTTGCGGCCGGTGGGGTGGCCGAAGAAGGTGGAGCCGTACGGAGGGCGGGTGACGGGGTCGAAGACGGAGTACCAGCCGAAGACGACGGGGTTGTTGCCCGTGTCGGCGAAGGAGTCGCCGAAGCTGAAGATGGCGTCGTAGCGCCGAACGGAGAGGGAGGAGGCGCCGGCGCCGGCGCCGGCGGCATGCAGCGACGACGAGAGAAGAAGAGAGACGACGGCGGAGAGCCATAACATGGTCATCGTTCGTGTTCTGCTCGATGCGGCCTGTCGGTAACTCGGTACGTGTGGACAGATTATTGGAGGAACACTATAACAAAATAGGGACATTATGACTACTTCCCTCT…
225	Chr01	6855032	6669875	TATATATATATATATATATATATATATATATATATAT	T	36	AGATTATCCCAAATATTGTATGTGTGTGATTCAGATGAATAAAGGAGCAACACCGGCTTCGGCCAACAGGATGTAGGGCTATTATCTGTCAGATAAGGGGTCCGAACCTGTATAAAAATCTCTGTATCCATATCTTTTACCTCAATCTCGCATATACCCTGATACCAACGATCCACATACCATCCAAATTCCGTAGTCGTGATATCAAACGTCGACAGCGTCACAAAAAGGTTCATATCAAGAACAATAAGTTTGGGATAATTTATTTTGAAACTATATTAAAAAACTTCAAAAACAAATGAGTAAAAAAGATCATCCACATATGTCATCTCTTGCATGAGGGGGACAATTTTATAGATAATCAGATTAGATCAAATCTAGCCTTTGCTTCAACATAAG…	AGATTATCCCAAATATTGTATGTGTGTGATTCAGATGAATAAAGGAGCAACACCGGCTTCGGCCAACAGGATGTAGGGCTATTACCTGTCAGATAAGGGGTCCGAACCTGTATAAAAATCTCTGTATCCATATCTTTTACCTCAATCTCGCATATACCCTGGTACCAACGATCCACATACCATCCAAATTCCGTAGTCGTGATATCAAACATCGACAGCGTCACAAAAAGGTTCATATCAAGAACAATAAGTTTGGGATAATTTATTTTGAAACTATATTAAAAAACTTCAAAAACAAATGAGTAAAAAAGATCATCCACATATGTCATCTCTTGCATGAGGGGGACAATTTTATAGATAATCAGATTAGATCAAATCTAGCCTTTGCTTCAACATAAG…
226	Chr01	6860969	6675775	TAGCCTTCTTACTCTCAATTTTGCGTTAACT	T	30	GAACAACTGACATGGAATGGAACCCACTTGTTTTGATCAGAGCATTTTTCTTGTAGACACGTCATGTGCTGGTCTGGTTTACATTTCACCCTAATTAACAGGTAGATACAAGCCTGAAAAAAGCCATCAGGACAATCTACCAGTGCATATGCATGCATATACTTTGATCAGGCTAGTGCATCTCATTTTTTTCCCCAAACTCATAATGTATATAAGTCATGGTATAGGCAGTAATCATTTGTTGCATTTTTAGTGATATGATTTGGCCGGCCTAATTTTAACTGGAGGGAGTGAAAACTAGAGTATTGAGTTTGAGGGAGAATAGCATAATCAGTTTAGTTTTGGTCGCGCGTCTTTTTTGAGAAAGCTTTGATTTCATTTCCTTTTTTTTTCATTTTG…	GAACAACTGACATGGAATGGAACCCACTTGTTTTGATCAGAGCATTTTTCTTGTAGACACGTCACGTGCTGGTCTGGTTTACATTTCGCCCTAATTAACAGGTAGATACAAGCCTGAAAAAAGCCATCAGGACAATCTACCAGTGCATATGCATGCATATACTTTGATCAGGCTAGTGCATCTCATTTTTTTCCCCAAACTCATAATGTATATAAGTCATGGTATAGGCAGTAATCATTTGTTGCATTTTTAGTGATATGATTTGGCCGGCCTAATTTTAACTGGAGGGAGTGAAAACTAGAGTATTGAGTTTGAGGGAGAATAGCATAATCAGTTTAGTTTTGGTCGCGCGTCTTTTTTGAGAAAGCTTTGATTTCATTTCCTTTTTTTTTCATTTTG…
227	Chr01	6917593	6742832	GATGGGACGGAGGCAGTATTTGGTTGGTGAC	G	30	AAATGTGTTAGAGGTAATTTGTTTTATATATATTGTCTCTTATAATTAATGAGTTGATGATGTGAACTAAATTTCACATCCACTATAAAACTTCCCCTTACTGGTTATCGATGAGGTTGGGATGCTCAGTGGTGCCACCTTCCATGCAAAGGTGGACAGTTACTCGTACTTCACGCGCTCGATCCATCACCCTTAAAAGTTAAAGCTTGTAATATTATAGGCTTTGTTCATTGGTTGTGAGCTAGTTTAGAAGCATAACTAGGTTATCTTACGAATAAAATGTAGTGGCATCAACGACGCAATTAGATTTCATATGGATAATTTCTAGGTGTCCAAACAATCATCAGACAAATAATCAATTTAGCTTTTTTTTAAAAAAAGATCGTTTTTCTCTTATTG…	AATGTGTTAGAGGTAATTTGTTTTATATATATTGTCTCTTATAATTAATGAGTTGATGATGTGAACTAAATTTCACATCCACTATAAAACTTCCCCTTACTGGTTATCGATGAGGTTGGGATGCTCAGTGGTGCCACCTTCCATGCAAAGGTGGACAGTTACTCGTACTTCACGCGCTCGATCCATCACCCTTAAAAGTTAAAGCTTGTAATATTATAGGCTTTGTTCATTGGTTGTGAGCTAGTTTAGAAGCATAACTAGGTTATCTTACGAATAAAATGTAGTGGCATCAACGACGCAATTAGATTTCATATGGATAATTTCTAGGTGTCCAAACAATCATCGGACAAATAATCAATTTAGCTTTTTCTTAAAAAAAAGATCGTTTTTCTCTTATTG…
228	Chr01	6919048	6744249	ATATATATATATATATATATATATATATATATATATAT	A	37	TTATGGACATGATTAAGATGGTGTTGTATGTTAGATTGTCATAACCAGCGATCAGGTTACTACTAGTACACTTAACAGTGTATGTTTATTTTTCATCTTATAAAGTTTTCTCTTAAATTACTCATCTGATTTACGATCCGATTACATCATTGTGTTCGTAACAATTAAATTTTTATAACAAGATCTTACATTATTATATTTTTTATGAAAAGTTACAAATTACTTTTATAATATATCTAAATAACTTTTAGATTTTATTAAATTACTTCTTGGTCATATAAAATTAAATTCAATAAAACCTAAAAATAATTTACATATATTATAAAAAATTTACATATATTATAAAAGTAACTTGTCACGACATCAAAAGTAAATCTATTATGGGGGATAAAAACATAA…	TCTTTTATTTATGGACATGATTAAGATGGTGTTGTATGTTGGATTGTCATAACCAGCGATATCACTCTTAGATCAGGTTACTACTAGTACACTTACAGTGTATGTTTATTTTTCATCTTGTAAAGTTTTCTCTTAAATTACTCATCTGATATACAATCCGATTACATCATTGTGTTCGTAACAATTAAATTTTTATAACAAGATCTTACATTATTATATTTTTTATGAAAAGTTACAAATTACTTTTATAATACATCTAAATAACTTTTAGATTTTATTAAATTACTTCTTGGTCATATAAAATTAAATTCAATAAAACCTAAAAATAATTTACATATATTATAAAAGTAACTTGTCACGACATCAAAAGTAAATCTATTATGGGGGATAAAAACATAA…
229	Chr01	6921484	6746644	TAAAAAAATCGATAAAACACCATGCCAATTATACATCCT	T	38	CTTATGATAGAACTTGCTCAGTGATTGGTCGGATTTAACATGAGCCCCTATTTAATAATATGAGTGTTCCTATTTACGATTAGTTATTTTTTTAACAGTCGATTGTGATAACTTTGTCTATGTTCGTTAATCTTAAAATAGGATTGTCTAATCTTTCGAAAGTGCACATAGCGATATGATGTGCATTTATAAACATAAGTGCGCGAGCGTGTGTGTTGTAAGCGTTTATTTTTCTACTTTGTTTGCAGAAAAAATATTTGGAATTTCGAAAACATATGGCATATTTAGAGGAGCTCCTGTCAGTTGAGAAGCGACAGTTATAAAATGTAGAATTAAAAGACAAAAGCTGAAAAAGTTTAGTTAATACTTACTCCGTCCAAAACGATCATCATATATATT…	ATTATGATAGAACTTGCTCAGTGATTGGTCGGATTTAACATGAGCCCCTATTTAATATGAGTGTTCCTATTTACGATTAGTTATTTTTTTTAACGGTCGATTGTGATCACTTTGTCTATGTTCGTTAATCTTAAAATAGAATTGTCTAATCTTTCGAAAGTGCACATAGCGATATGATGTGCATTTATAAACATAAGTGCGCGAGCGTGTGAGTGTTGTAAGCGTTTATTTTTCTACTTTGTTTGCAGAAAAAATATTTGGAATTTCGAAAACATATGGCATATTTAGAGGAGCTCCTGTCAGTTGAGAAGCGACAGTTATAAAATGTAGAATTAAAAGACAAAAGCTGAAAAAGTTTAGTTAATACTTACTCCGTCCAAAACGATCATCATATATATT…
230	Chr01	6925000	6750088	GGCGCGCGGCGGCCGGGCAAGGAGGGAGGCA	G	30	TCAGTGGACGATTAACGGGTGATTAACGATTAATTAATTACTAATGATGTTAGTTAAAGGAGTAATTGTAATTAATTAATTGCTAATTACACTAATTAATTTATTGATAGCGAGAGTACGCGGGTTAGGTAAGCGAAGTCGCGGTGCGAGACCGAGCGGTTTCGCGCACACCTCGCGCGACATCGTGCAGTAACGCACGATTTCGCGCTTTCATTTCACGACAATGGTATATTTCTGTAAATATTTTCTAAATGAGCGTATTTGTACAAAACCAATGAAAAAGAGGTATATTTTCAATTTTTTTTCCTCTACTCTCTATCCCCCCTCTCTCTCCCTTACAGAACGGTGAGCGGCGGCGCAGCGGGGGGCGGTGGGCAGAGAGGCACGCGACGGCCAGGC…	CTTGCGAGATGGCCTGATATGACTCATGATCAGTGGACGATTAACGGGTGATTAACGATTAATTAATTACTAATGATGTTAGTTAAAGGAGTAATTGTAATTAATTAATTGCTAATTACACTAATTAATTTATTGATAGCGAGAGTACGCGGGTTAGGTAAGCGAAGTCGCGGTGCGAGACCGAGCGGTTTCGCGCACACCTCGCGCGACATCGTGCAGTAACGCACGATTTCGCGCTTTCATTTCGCGACAATGGTATATTTCTGTAAATATTTTCTAAATGAGCGTATTTGTACAAAACCAATGAAAAAGAGGTATATTTTCAAAAATTTTTTCCTCTACTCTCTATCCCCCCTCTCTCTCCCTTACAGAACGGTGAGCGGCGGCGCAGCAGGGGGC…
231	Chr01	6943564	6755775	C	CAGCGGAGGGCAACCGCGGCCGCGGCAAGCGAAGCAGGCAGGAGCGG	46	TACTATCTTAGGATATTATTTAATCTTGTTTCAAAAGATGGGGTTCAATGTTTTTATATTGCAGTTTAAGGATGTCATTCAAACGTCACATTAAGATGAGATACAATGTGAACTTATTCCTCTATGCTTAGATGTGTGGGGTGGGGTAGAGCCTGGAGGGGTAGGCCGGTGCAGTGCAGCAGTGAAAGGAATAAGTTCACCGGAGGTCCCTCAACTTAACAGCGAGATTTTTTAGGTCCCTCAACCACAAAACCAGAAATGTTCGCCCCTAAACTCATTCAAACCGTTCACAGGAGGTCCCTTGGCAGTATAGGTGGGTGGTTTCGCTGGCGTGGCATCCTAGTCAGCAAAAAAAAATAAAGTACGTGGGGACCACATGTAAGTGAGAGAAAACGGTGC…	TATCTTAGGATCTTATTTAATCTTGTTTCAAAAGATGGGGTTCAATGTTTTTATATTGCAGTTTAAGGATGTCATTCAAACGTCACATTAAGATGAGATATAATGTGAGCTTATTCCTCTATGCTTAGATGTGTGGGGTGGGGTGGAGCCTGGAGGGGTAGGCCGGTGCAGTGCAGCAGTGAAAGGAATAAGTTCACCGGAGGTCCCTCAACTTAACAGCGAGATTTTTTAGGTCCCTCAACCACAAAACCAGAAATGTTCGCCCCTAAACTCATTCAAACCGTTCACAGGAGGTCCCTTGGCAGTATAGGTGGGTGGTTTCGCTGGCGTGGCATCCTAGTCAGCAAAAAAATAATAATAAAGTACGTGGGGACCACATGTAAGTGAGAGAAAATGGTG…
232	Chr01	6956524	6768722	T	TTTATATAATTAGATTTGTAAGTACTCTATATTTAA	35	TGCCCAGCTACGCGTCGCGCCAACCCGCAAGCGTACGTGCGCGCGCACCGAAGCACCCATGCCACCGGCCGGGCAGAGGCCGGCCACCCGTCACGCACCGCCGCCCGCGGCGTCGTCGCCTCGCGCCCGCCGTGACGAGATGGCACCGACGCTATCCACGCGCGTACGTTCGTGGGTGGGGTGGCCTCGGCGCTGTCGCCTTTCGCGGCGACCGAGGCGAGAGACGGGAGAGACCCCGCGGGCGCGAGCACCGGCAGACGCGACGGCACGGCACGCCGAGGCTGAGACCTGTTTAGATCTAGTTTGGACATTAATTATAAATATTAAACATAAACTATTAATAAAAATTCATCCATAATCTTAGACTAATTTATGAGACAAATCTATTGAGCCTAATTA…	TCGCGCCAACCCGCAAGCGTACGTGCGCGCGCACCGAAGCACCCATGCCACCGGCCGGGCAGAGGCCGGCCACCCGTCACGCACCGCCGCCCGCGGCGACGTCGCCTCGCGCCCGCCGTGACGAGATGGCACCGACGCTATCCACGCGCGTACGTTCGTGGGTGGGGTGGCCTCGGCGCTGTCGCCTTTCGCGGCGACCGAGGCGAGAGACGGGAGAGACCCCGCGGGCGCGAGCACCGGCAGACGCGACGGCACGGCACGCCGAGGCTGAGACCTGTTTAGATCTATTATTACATTGGATGTTTGGACATTAATTATAAATATTAAACATAGACTATTAATAAAAACTTATCCATAATCTTAGACTAATTCACGAGACGAATCTATTGAGCCTAATTA…
234	Chr01	6979766	6792987	G	GTCACCGTCTTCGTCCTCCCCCGGTCTCCCCCTGG	34	AATTGAGAAAGAAGAAGAACGCTCTAGTAACCGCCAGTCCTTCATTAGTTCATGTGCTTCAAAACCAAGCTATAAAAGATAAATATTTTTTTCTGTGCTTTGGACGATGACAACCTAGCGCGACGTGGCAGCGCGCCACTGGCTCGGAGAGGATACGTGGCACGCATGCACACGCCTCGGGACGCGAGCGAGACGCAGAAAGAAAAATATCTCTCACCCGGCGGCACGCGTCCTCGCGGCACGGGCCTTCTTCTTGCGGCCCACCAAGGGGAGGAGGCGAAACGTACGTGGGCCACTGGGCCGTGCGTTTCGTTTCCTGGACTCCACCGAGCGAGCCCGCGGCTTCCTCCTCCTCCTCCCCTCTCCCTCCGCTCCGGCGGAGCGCCGCGAAACGCCCGC…	AATTGAGAAAGAAGAAGAACGCTCTAGTAACCGCCAGTCCTTCATGAGTTCATGTGCTTCAAAACCAAGCTATAAAAGATAAATATTTTTTTCTGTGCTTTGGACGATGACAACCTAGCGCGACGTGGCAGCGCGCCACTGGCTCGGAGAGGCTACGTGGCACGCATGCACACGCCTCGGGACGCGAGCGAGACGCAGAAAGAAAAATATCTCTCACCCGGCGGCACGCGTCCTCGCGGCACGGGCCTTCTTCTTGCGGCCCACCAAGGGGAGGAGGCGAAACGTACGTGGGCCACTGGGCCGTGCGTTTCGTTTCCTGGACTCCACCGAGCGAGCCCGCGGCTTCCTCCTCCTCCTCCCCTCTCCCTCCGCTCCGGCGGAGCGCCGCGAAACGCCCGC…
236	Chr01	6998475	6820439	GATATATATATATATATATATATATATATATAT	G	32	TCAGTCGCACGTACATCTGCCTCCCCCTGCGTGGCCCGGCCCTCTCTTGCACAGTTCCATATGCTAAACTCTTTTAGTTCTAAAATAATTCTTTAAACTTTCAACTTTTTTATCACATATTAAAACTTTTCTACACACATAAATTTCTAACTTTTCCGTCATATCATTCTAATTTTTACCAAACTTTTAATTTTGGTGTAAATTAAACGCAGCCTTTAAGTCTCCTTTGGACGACTTCGCTGCTTGATTCATGCATGCCGTCCCCCCTGGCCTCTCGAGACCTCTTGGCTCTTTTGCTCTTGCATGCATGTACAGCGTGTACAGTGTACGCATACACACGCAATACGCGTGCATATATACGTGATGAGACTAGGTACAGGTAATGTATATGTACAATTA…	CACGTCAGTCGCACGTACATCTGCCTCCCCCTGCGTGGCCCGGCCCTCTCTTGCACAGTTACATATGCTAAACTCTTTTAGTTCTAAAATAATTCTTTAAACTTTCAACTTTTCTATCACATATTAAAATTTTTCTATACACATAAACTTCTAACTTTTAAGTTATATCATTCTAATTTTTACCAAATTTTTAATTTTGGTGTAAATTAAACGCAGCCTAAGTCTCCTTTGGACGACTTCGCTGCTTGATTCATGCATGCCGTCCCCCCTGGCCTCTCGACCTCTTGGCTTTTTTGCTCTTGCATGCATGTACAGCGTGTACAGTGTACGCATACACACGCAATACGCGTTCATATATACGTGATGAGGCTAGGTACAGGTAATGTATATGTACAATTA…
237	Chr01	7000827	6822807	A	ACTGCGCCCCGGCGGTAAGCACGGTTACCGCGCGGTAACCGTG	42	CTCCTGTAGTGTGGTAGCTAGGAGGAATCGTTCACTGTTTCGTACATTTGTTATTTGCGCGCACACACTGTTCTTACGGTGCACTGCACATACGCACGCATGGGGGCGAGCAACCCTTGTCGGTCGATCGACGAACAAAAACTGTTCGTCATCACTAGTACGAGTCCAGCCTGCCAACATGCAGGCATGCAGCTGCCGCCATGGCGTTGATACGATGATGACGACGACGACGACGACATATGTTGTCACGTTGAAGGCCACTACAACAAAACAGTTTATTTTTCGAGATTTAGAGGGAGAGATGCTGCTCCAACAATACTTTAAGAAAAAAAATGAGCATGTTGAGGATTGAACACGGACCGGACCTTGGTTGAAACTATAAACCCTTTATTAAATCGC…	CTCCTGTAGTGTTGTAGCTAGGAGGAATCGTTCACTGTTTCGTACATTTGTTATTTGCGCGCACACACTGTTCTTACGGTGCACTGCACATACGCACGCATGGGGGCGAGCAACCCTTGTCGGTCGATCGACGAACAAAAACTGTTCGTCATCACTAGTACGAGTCCAGCCTGCCAACATGCAGGCATGCAGCTGCCGCCATGGCGTTGACACGATGATGACGACGACGACGACGACATATGTTGTCACGTTGAAGGCCACTACAACAAAACAGTTTATTTTTCGAGATTTAGAGGGAGAGATGCTGCTCCAACAATACTTTAAGAAAAAAAATGAGCATATTGAGTATTGAACACGGACCGGACTTTGGTTGAAACTATAAACCCTTTATTAAATCAC…
238	Chr01	7019048	6842409	TTTCATGTTGCGTATAATGTTTGATTTGGTTGCATT	T	35	GGAGATGTTCCACCTCTTCAAGATGATTTCACACCATATCTCTATTTGAATGGTGCCAATCTATCCATCTTCGAAGACATAAAGTGAATTGTTTCTGGAAAACAAGTTGGATACTAAAGGTGAACTTGTGATGACATGTTATGTTTCATAAAACCTGCTTATGGTTGAAATCATCGTTTTCTAAAAATATTCGTTCTTGTAATTTCAGGTAATTGACGTCAGATTGTCATGAGTTGATGCCCTCTTGGACAAACTCATCATGAAACCAAGCATTTTATTCCATGAAGCTCATGAAGACGATCGAGCCAGTCGTTGCTATCTCTCTTATAAGGATTTCCAGTTTGGATATTGCCGTACTCTGTTACTTTTCTTCATGTCGAATTTACCATGCGTGCTACG…	GAGATGTTCCACCTCTTCAAGATGATTTCACACCATATCTCTATTTGAATGGTGCCAATCTATCCATCTTCGAAGACATAAAGTGAATTGTTTCTGGAAAACAAGTTGGATACTAAAGGTGAACTTGTGATGACATGTTATGTTTCATAAAACCTGCTTATGGTTGAAATCATCGTTTTCTAAAAATATTCGTTCTTGCAATTTCAGGTAATTGACGTCAGATTGTCATGATTTGATGCCCTCTTGGACAAACTCATCATGAAACCAAGCATTTTATTCCATGAAGCTCATGAAGACGATCGAGCCAGTCGTTGCTATCTCTCTTATAAGGATTTCCAGTTTGGATATTGCCGTACTCTGTTACTTTTCTTCATGTCGAATTTACCATGCGTGCTACGT…
240	Chr01	7065468	6898770	C	CCAACCCCATCCCCACCCCATCCCCCGTCCCCC	32	GCCATTTGGTGCCGGTAGGAGGGGGTGTCCTGGGGTCGGGTTCGCTGTGCAAGCCATGGAGATGGCATTGGCGAGCTTGCTGTACAATTTTGACTGGGAGACGAGAGTGGTGGATAGGAGGAGCGAGTTTGGGACTTCATCACTAGACATGAGTGAGATGAATGGGCTTTCAGTCCGTCTCAAGTACGGACTACCCCTCATTGCTATATCGCGCTTTCCTTAATATAAAAGGGATTGTATGTATTTATGTTGCCACATTAAATAAAATAAAAAAATTTAACATGAGTTTCACGATATAATTCCATCTTTAGTTGTAGATTTCATGTATTTTAGTATTGACATTATAAATTTCAAACCTTACGTTGTAAAATTTGGAAGCTTACACCATAGTTTTTCCCC…	GTGCCATTTGGTGCCGGTAGGAGGGGGTGTCCTGGGGTCGGGTTCGCTGTGCAAGCCATGGAGATGGCATTGGCGAGCTTGCTGTACAATTTTGACTGGGAGACGAGAGTGGTGGATAGGAGGAGCGAGTTTGGGACTTCATCACTAGACATGAGTGAGATGAATGGGCTTTCAGTCCATCTCAAGTACGGACTACCCCTCATTGCTATATCGCGCTTTCCTTAATATAAAAGGGATTGTATGTATTTATGTTGCCACATTAAATAAAATAAAAAAATTTAACATGAGTTTCACGATATAATTCCATCTTTAGTTGTAGATTTCATGTATTTTAGTATTGACATTATAAATTTCAAACCTTACGTTGTAAAATTTGGAATCTTACACCATAGTTTTTCC…
241	Chr01	7069467	6902816	C	CATATCATATTAATGAAACTAACAAGAGATTGATATGGTATACCTTCGA	48	TCAACCTGATCACTAAGCTAGTTTCTTCTCCTTCCCTCCTCCTCTCTTCAATTACTTTTCTCCTCAATTATTTACCTGATCTACAATCTGATCACACTATTATATTCGTTGTAATTAAATCTTTACAACAAGATATCGTATAACTATATTATGATAAAACTAGATGTTTCATTACGTGATAGTAACATGTTTACATGTGTATTTTCACTGTGTTTCACAAAACTCACCCCTATTCTCCCTCCACTCCATCCTGCATGTATTTAACGATCTTCAAAACGATTTTTCTTCTAAATTACTTATCCGATTACATCGTTATATTTGTTATAATTAAATATTTATAACAAGTATCGCATGTTTAAATTCTAATGAAAAAACATATATTTCAATCCGTTAACACTC…	CTGATCACTAAGCTAGTTTCTTCTCCTTCCCTCCTCCTCTCTTCAATTACTTTTCTCCTCAATTATTTACCTGATCTACAATACAATCTGATCACGCTATTATATTCGTTGTAATTAAATCTTTACAACAAGATATCGTATAACTATATTATGATAAAACTAGATGTTTCATTACGTGATAGTAACATGTTTACATGTGTATTTTCACTGTGTTTCACAAAACTCACCCCTATTCTCCCTCCACTCCATCCTGCATGTATTTAGCGATCTTCAAAACGATTTTTCTTCTAAATTACTTATCCGATTATAGCGTTATATTTGTTGTAATTAAATATTTATAACAAGTATCGCATGATTAAATTCTAATGAAAAAACATATATTTCAATCCGTTAACACTC…
242	Chr01	7077454	6934405	TTAGTCCCGGTTGGTGTTACTAACCGGGTTTTTA	T	33	TCCTTTTCGTTGATGATCCGAGCTGTCCATATATAAGTGTATTGCGGTGTCCGAAATTCGAAAGAATCATGGCCTTGTGAAATTAATCATCGATATATACGAATATATGTTGCCATCTCGGTAGAATCGATCGATGGGCAGTATACCTAGCTTCATACGTCACGATTGGATTGCGTAATAAGCACAGTCATATGAAGGTTGTGAAACCGAACACTGGTAGAGAAACCATCTTTGGTTGGTCAACCCAAATCCATAATAGTCCCGGTTCCATTAAAAACCAGGAATAAAAATAATTTTTAGTCCCGGTTAATAAGAGAAAGATCTTTAATCCCGGTTGTTGTTACCAACCGGGACTAAAAATCATCTTTAGTCCCGGTTGGTAACTTCAACCGGGACTAA…	TCTTTTTCGTTGATGATCCGAGCTGTCCATATATAAGTGTATTGCGGTGTCCGAAATTCGAAAGAATCATGGCCTTGTGAAATTAATCATCGATATATACGAATATATGTTGCCATCTCGGTAGAATCGATCGATGGGCAGTATACCTAGCTTCATACGTGACGATTGGATTGCGTAATAAGCACAGTCATATGAGGGTTGTGAAACCGAACACTGGTAGAGAAACCATCTTTGGTCGGTCGACCCAAATTCACAATAGTCTCGGTTCCATTAAAAATCGGGACTAAAAATGATTTTTAGTCCCGGTTAATAAGAGGAAGATCTTTAGTCCCGGTTGTTGTTACCAACCGGGATTAAAAATCATCTTTAGTCCCGGTTGGTAACTCCAACCGGGACTAA…
243	Chr01	7080748	6936576	G	GGAGTCTGGCGCGCGCAGGGAGGCGCGGCGCAGCG	34	TGTGATTTTTACACCTATTTTTTTAAATGAAACAGCCTTCTGCTACTAGGTTTGACAGAAGTCTGGTGGGCCGGAATTTTCGAATTAAACAAAAAAAGAAAATGTTATTATAATTTGTGAATGACTATGCTACCCTTGGTTCAATGAAGAGCCAAATCCCCCAATCCCTTACTACTACCTCCGTCCCGTTCTAGAATACTTGTTGCTTTAAGTTTTTGTTTGTAAAGTTTGATCATTCGTCTTATTCAAAATATTATGGAATTATTATTTATTTTTTTGACTTGCTTTATTATCAATATTACTTTAAGTATGACTTATCATTTTTTATATTTGCACTAATTTTTTAAATAAGACGAATGGTGAAACATCGAAAGAAAAAAGTCAAAGTGACAACTATTA…	GACACCTCCAAGATCACCAATCACGGCAAGCATGCCTGGAACATTTGGGTACATGGCACCAGGTACTAACATAATACATTTTAATTTCCATAAACAAATTGACTGACTGGATATATCATCATGGATATTACTTTTGTTAGATTATCAATCATGCTTAAAAAAATTGGGACAATTGTGTTTCTGCCCGTGCTTTACGATTCAATTGTGATTTTACCATATATTTTAGGGTTTGTGATTTTTGCCCCTATTTTTTTAAAATGAAACAGCCTTCTGCCGATAGGTTTGACAGAAGTCTGGTGGGCCGGAATTTCCGAATTAAACGAAAAAGAAAATGTTATTATAATTTGTGAATGACTATGCTACCCTTGGTTCAATGAAAGAGCCAAATCCCCCAATCCC…
245	Chr01	7123499	6977818	AGGAAATAAAAGGATAGCAGTTGTTTTTTTTT	A	31	TATAGAAATCCAGTGTTTGGAAAAAGCATGGACTACTGGGTTAAGTTAAGTGGATGGAAATATATTGGACTACTGGGTTGTGCCTGATAATAGTTTTTCATTAATCCTTCATGCTGTCACGCATTTGGTACTTTGTTTACTGTTATTTTCTTTGGTTAACTTCTGTCCATACGTTCCTCCCAGGGTTCATACTTCACCAGCCCAGCTGATAGTTACGACGCACTAGGATTGATGAAGCAGATAAATGTGCAGACTGCTGCTGCTTTGGTGGAAGCCCGTGAGGTACTGGCAAGCGGCGGCCAATGTGACAACATAAGCTCTGATAAGGAAAACACGGGGAATCCAGATGCCAAGAAGGAACCAGGGACAACCAAATTGCAAACAAAAATCATGGTACGC…	AATCCAGTATTTGGAAAAAGCATGGACTACTGGGTTAAGTACTTAAGTGGATGGAAATATATTGGAGGACTACTGGGTTGTGCCTGATAATAGTTTTTCATTAATCCTTCATGCTGTCACGCATTTGGTACTTTGTTTACTGTTATTTTCTTTGGTTAACTTCTGTCCATACGTTCCTCCCAGGGTTCATACTTCACCAGCCCAGCTGATAGTTACGACGCACTAGGATTGATGAAGCAGATAAATGTGCAGACTGCTGCTGCTTTGGTGGAAGCCCGTGAGGTACTGGCAAGCGGCGGCCAATGTGACAACATAAGCTCTGATAAGGAAAACACGGGGAATCCAGATGCCAAGAAGGAACCAGGGACAACCAAATTGCAAACAAAAATCATGGTACAC…
248	Chr01	7214996	7072441	AAAAAAGTGGGGCCCACATGTCAGCTACACAACAA	A	34	TCTACAACTTGAACCATAAAACATGTAGTTTTGTGAAATTTACTCTTTTTTTAAACAAGGTAGACGATTAAAGTTGGACATGGAAATTCATAGCTACAGTTAAAACCGGACGAAGGGAGTAAGTAATCGATGAAAATTTAGTTCCTTGGGCCAGCCCTTGGGATTTTCACTAGCTGGCTGACAACCATCTGGGCCATACACGTAGCCCAACAAAGGCCCATAGACAGCTGCATTAATGCCTTGGAATAAGTTCACTTTAGGTCCCTTAACTTGTCAACGAATCCGATTTTCGTCCCTCTACCAGAAAACCAGACACAGCGGCTCCCTAGATTAGGTCCCTCGGCGGTTTTGAGGGTGGTTTTGGCTGATGTAGCGCTTACGTGGCTAATTTGATTAGGT…	AACATGTAGTTTTGTGAAATTTACTCTTTTTTTAAATAAGGTAGACGATTAAAGTTGGACATGGAAATTCATTGCTACACTTAAAACCGGATGAAGGGAGTAAGTAATCGATGAAAATTTAGTTCCTTGGGCCAGCCCTTGGGATTTTCACTAGCTGGCTGACAGCCATCTGGGCCATACACGTAGCCCAACAAAGGCCCATGGACAGCTGCATTAATGCCTTGGAATAAGTTCACTTTAGGTCCCTTAACTTGTCAACGAATCCGATTTTCGTCCCTCTACCAGAAAACCAGACACAGCGGCTCCCTTAACTATCAAAACCGGTATAGATTAGGTCCCTCAACGGTTTTGAGGGCGGTTTTGGCTGATGTGGCGCTTACGTGGCTAATTTGATTAGGT…
250	Chr01	7264226	7121853	C	CCGCGGAGAAGAGAAAAAAGAAAGGGGAAATACAGGGTGATGACGTGG	47	GAGCCGAGTGAGTGCGGCGGCGTGGAGGACGAGTGCTTCCGCGACGGCGCAATGGACGAGCAGCTCCTCGAGCTGTCCATGCCGACGCCCGCATCCGCCCGGCGCTCCGCACGCTGAAGCAGAACCTTTCACTGCTCCTCTCCGTGCTCGTCGACCGCGCGCAGCCGGCGGCGGAAAGCATCGTGGCGCTCATGGGGCAAACGGCGGAGTAGCTCGTGGAGGAGCTGAGCATCGCGTGCGAGTTGAACGGAGCGGCGAGCTCCGCCGGCCAGAGGATGCCGGTGCCGGTGACGCGGCGGATGCGGCGGCGGAGGAGGAGGAGGACGCCGACGACCACCGGGAGAAGCAGGGCACACACCGTCGATGCGGCGGTGGAGGAGGAGGACACCGGCCACCGTG…	AGTGAGTGCGGCGGCGTGGAGGACGAGAGCTTCCGCGACGGCGCAATGGACGAGCAGCTCCTCGAGCTGTCCATGCCGACGCCCGCATCCGCCCGGCGCTCCGCACGCTGAAGCAGAACCTTTCACTGCTCCTCTCCGTGCTCGTCGACCGCGCGCAGCCGGCGGCGGAAAGCATCGTGGCGCTCATGGGGCAAACGGCGGAGTAGCTCGTGGAGGAGCTGAGCATCGCATGCGAGTTGAACGGAGCGGCGAGCTCCGCCGGCCAGAGGATGCCGGTGCCGGTGACGCGGCGGATGCGGTGGCGGAGGAGGAGGAGGAGCCGAGGAGGACGCCGACGACCACCGGGAGAAGCAGGGCACACATCGTCGATGCGGCGGTGGAGGAGGAGGACACACCGTG…
251	Chr01	7282777	7140457	TTGGATCCCCCCCCCCCCCCCCCGGATTTCTGG	T	32	TGGGATTTTTCTTTTTTTTTTTGTTTTTATGGATTTTGTTGGGAAAAGATTATGTTTGGGGTTACATGTTATAAGCTGATTGAATCAACTATGTTATCATGTTAAAAATGCTAGTTATGTCAGCTAATCATGATTATCATTCTGGACCGATGAACTCATTCTTTGTTTCAGGCTGTTGACAGTCCAATGTCTAGCTTCACTCACTTCATCTCGCTTCCGTTGGGTATCCACCCACAACTTGTTGATAAGCTGAATGAATTCAAGAGGTCAATCCTGACTTCTAATGAATATAAAGGTAAGGATAGGGACCTAAGTGAAGTTCTATACTTCTATAGTTCTATGGATGAAATGTACTATTAACACAAGCAATTAGAAAGGCCTAGTGTTTCAATAGAATGC…	GTGGGATTTTTCTTTTTTTTTGTTTTTATGGATTTTGTTGGGAAAAGATTATGTTTGGGGTTACATGTTATAAGCTGATTGAATCAACTATGTTATCATGTTAAAAATGCTAGTTATGTCAGCTAATCATGATTATCATTCTGGACCGATGAGCTCATTCTTTGTTTCAGGCTGTTGACAGTCCAATGTCTAGCTTCACTCACTTCATCTCGCTTCCGTTGGGTATCCACCCACAACTTGTTGATAAGCTGAATGAATTCAAGAGGTCAATCCTGACTTCTAATGAATATAAAGGTAAGGATAGGGACCTAAGTGAAGTTCTATACTTCTATAGTTCTATGGATGAAATGTACTATTAACACAAGCAATTAGAAAGGCCTAGTGTTTCAATAGAATGCA…
252	Chr01	7284705	7142353	ATATATATATATATATATATATATATATATATATA	A	34	TGCTGGAAGTTGGTGAACAGGGACGCCTACAACAAGTTTGCGGTATCCTTTGAACTTCTAACAAACATTCTTGGGGACATATGATGTGAAAACTCATGTTTTCAATACAATCTTAATTACAAAGTCGCACCTGTACAGTTTGAGATGTCTTACTGATGGAACATGTTTTTTAGGTGGTAGAGGCCCTCATAAATCATGTATTCAACATGTGAGCCATCGCTTAACATACAGCCCACATGAAAAGCTTGCATTTATTGCACTTGTAGTTGATAAATTCCAATCTTTTTTATGCAAAATGTTGTTCCTTCACTTCCTTTTACTTAATCAGACATTATAATTGATGCCTTTACCAGCTCAAACCTAGCACCTACAAGTGATGAGAAGCGAGAACTGAAGGTT…	TGCTGGAAGTTGGTGAACAGGGACGCCTACAACAAGTTTGCGGTATCCTTTGAACTTCTAACAAACATTCTTGGGGACATATGATGTGAAAACTCATGTTTTCAATACAATCTTAATTACAAAGTCGCACCTGTACAGTTTGAGATGTCTTACTGATGGAACATGTTTTTTAGGTGGTAGAGGCCCTCATAAATCATGTATTCAACATGTGAGCCATCGCTTAACATACAGCCCACATGAAAAGCTTGCATTTATTGCACTTGTAGTTGATAAATTCCAATCTTTTTTATGCAAAATGTTGTTCCTTCACTTCCTTTTACTTAATCAGACATTATAATTGATGCCTTTACCAGCTCAAACCTAGCACCTACAAGTGATGAGAAGCGAGAACTGAAGGTT…
253	Chr01	7287101	7144728	C	CACTGTCATGTTCTAAAATATAAGATTTTTTTTATTGGATAAG	42	TCAAAAAGGAAAATATTAGATTGTAGAATAATTAGTATGAGATGATCACGGCAAGAACAATTTTTCGTAGCTGATAGAAAGAATGAGCTGATAGAAAGAATGAGAGAACCTAAGGCTATAGGCTAACAATTACATAGATTTACTCTACAAAGCACAAAGGTCTATAAAGGTATACGGTCACTAGTTTTTCTTGTCTACAGTTTGCCATCAGTAACAGATATCGGTACCTGAGAGAACCTAAGGCATTCTAATTTGAAGTCAAAATGCACCCTGCAAAATCATTGGTAATGTTAGGTTTAGTCCTACATCGATAATTGATGATGAGGGAGCACGACTTAAAATGTGAGTGTAGTCCTCACCTATCAAACTAGTCTTTTGGGTGTGTAGGCCCAGGATCTA…	ACAAGGAAGAATTTCAAAAAGGAAAATATTAGATTGTAGAATAATTAGTATGAGATGATCACGGCAAGAACAATTTTTCGTAGCTGATAGAAGGAATGAGAGAACCTAAGGCTATAGGCTAACAATTACATAGATTTACTCTACAAAGCACAAAGGTCTATAAAGGTATACGGTCACTAGTTTTTCTTGTCTACAGTTTGCCATCAGTAACAGATATCGGTACCTGAGAGAGAACCTAAGGCATTCTAATTTGAAGTCAAAATGCACCTTGCAAAATCGTTGGTAATGTTAGGTTTAGTCCTACATCGATAATTGATGATGAGGGAGCACGATTTAAAATGTGAGTGTGGTCCTCATCCATCAGACTAGTCTTTTTGTGTTGTGTAGACCCAGGACCTA…
254	Chr01	7362620	7219933	ATCTCTCTCTCTCTCTCTCTCTCTCTCTCTCTCTCTCTCTCTC	A	42	ATACTTCCAAACACAGCCTAACTCTCAGTAAATAGAACCAGACGAAGCGAATCAACAAGAAGTTATTTCATAGGTAAAAAGTGAATAAATCCCAATTAATTAAGCCAATAGATGAATAATCTAGCTAGATTTAATCATACTATGAGCCTATTTTTCACGGTGACATTCCTGGCGACAGGGTATATTGTCATTGAAGTACTCCATGTGTGTGGACCTTGTGATGCAAGCTTGAGTGATGAACTAAAACAGCGACAAAGCGCCCAAGGTATTAGAAGGGAAAAAAAATTAAAGAGCTGAAATGACTACTTTGCCCCTGTCCTAAACAACAAAAGAAAATATCAAGGCAAAACTTAAATATCAATCAACATCTTTACTCCTCCTTTTCTTAATTTCTTTTTG…	ATACTTCCAAACACAGCCTAACTCTCAGTAAATAGAACCAGACGAAGCGAATCAACAAGAAGTTATTTCATAGGTAAAAAGTGAATAAATCCCAATTAATTAAGCCAATAGATGAATAATCTAGCTAGATTTAATCATACTATGAGCCTATTTTTCACGGTGACATTCCTGGCGACAGGGTATATTGTCATTGAAGTACTCCATGTGTGTGGACCTTGTGAGGCAAGCTTGAGTGATGAACTAAAACAGCGACAAAGCGCCCAAGGTATTAGAAGGGAAAAAAAATTAAAGAGCTGAAATGACTACTTTGCCCCTGTCCTAAACAACAAAAGAAAATATCAAGGCAAAACTTAAATATCAATCAACATCTTTACTCCTCCTTTTCTTAATTTCTTTTTG…
255	Chr01	7362967	7220230	G	GATATATATATATATATATATATATATATATATATATATATATATATATAT	50	AACTTAAATATCAATCAACATCTTTACTCCTCCTTTTCTTAATTTCTTTTTGAGCCCTCACTCTCTGTCCTCTCTTTTTGTTGAATTAATTAATTAATTCTCCCTTTCAATCTTTTTTTAAGAACTCTTTTCTTTTTAGAACTCCCCTCTCAATCTCTCTCTCTCTCTCTCTCTCTCTCTCTCTCTCTCTCTCTCTCTCTCTCTCTCTCTCTCTCTCTCTCTCTCTTTTTCCCCTTTAAAGATATGCGTGCAGTGACGATCGATTGAAGAAGCAGAGCGTGATTAGGATCAAGCTCACGTCGTTTTCGCCGTGGCACTGATTGATATCTGGCTCAGTTTGCTTGCTTGCTTGCTTGCTTCAGGTTCCTAAGTAATTATCTCTAAATAATTAAGCTTCCG…	AATGACTACTTTGCCCCTGTCCTAAACAACAAAAGAAAATATCAAGGCAAAACTTAAATATCAATCAACATCTTTACTCCTCCTTTTCTTAATTTCTTTTTGAGCCCTCACTCTCTGTCCTCTCTTTTTGTTGAATTAATTAATTAATTCTCCCTTTCAATCTTTTTTTAAGAACTCTTTTCTTTTTAGAACTCCCCTCTCAATATCTCTCTCTCTCTCTCTCTCTCTCTCTCTTTTTCCCCTTTAAAGATATGCGTGCAGTGACGATCGATTGAAGAAGCAGAGCGTGATTAGGATCAAGCTCACGTCGTTTTCGCCGTGGCACTGATTGATATCTGGCTCAGTTTGCTTGCTTGCTTCAGGTTCCTAAGTAATTATCTCTAAATAATTAAGCTTCCG…
256	Chr01	7372613	7229934	ACCTTGTCCGCGCCTCGCCTGGGCGGCAGCGGCATCTTGCCTGCCGCCACCACCAC	A	55	GAGGAAGCGACCAGCTGATGTCGTGCCGGATGAGGAACAGTACCACGCAAATTGCTAGCAATTAGTTCGAGTTTGTTAAAAAGTCAGTTTGGATGTAAGGCTATTTAGAGCCACGAATCTATAGTTAAAGGCAAGCAAGATTGAATCTATACTTCTCATCTCCACTTCTCTATCTCATCCCCTGTTTCTCCTAAATTGCCACCACTGGCAGGGCGTCGAAGAGGCTACCGAAGCCTCGACCTCCTGTGTCCCATTCATACCCACTTCGTTCGCTTGCTGGTGCTCGTAACAACTTGGTATCATAGACCATGGTTCTTGAGGAAACTTCTTCCTCCAAGCAGCCATCCCCTAGTGCTGATGCACTGGCCAAGCTCTAGGAGTCCATGGCGGATGTGTTGA…	CCAGATGAGGAACAGTACCACGCAAATTGCTAGCGATTAGTTCGAGTGTGTTGAGTCGTTTGTTATCCCTTTTTATTACCAGAGTCAGTTTGGATGTAAGGCTATTTAGAGCCACGAATTTATGGTTAAAGGCAAGCAAGATTCAATCTATACTTCTTATCTCCACTTCTCTATCTCATCCCCTGTTTCTCCTGAAACACCACCACGAGCAGGGCGTCAAAGAGGCTACCGAAGCCTCGACCTCCTGTATCCCATTCATACCCAATTCATTCGCTCGCCGGTGCTCGTAACAACTTGGTATCAGAGACATTGGTTCTTGAGGAAATTTCTTCCTCCAAGCAGCATTTCGCTCAGGAGACATCTGGCCAAGCTCCAGGAGTCCATGGCGGATATGTTGAG…
257	Chr01	7380727	7241585	AATCAAGCAACAGCAACTCACTTATGCCCCAAGAGCAACCA	A	40	AAAGCTTTTATTTTGAACTTTTGAAGGTGCCAATAAACCCTCAAGTGAATTTAGCCTGTTGACCTGAATGCTCCCCAAGAAATCAATCAATCAATTAACCATGAAAAGAAACCAGAAAATCAGCAAGATAAATCTTGTGGATTGGAATAGGAGTATCCTCAAAATCAGCAAGGAAGAATGTGGCAGAGGTCCAAATTTGAATGTGAAGAGCACTGAAAAACCAAAAGGCAAGAATATCTTGGGGATTGGAAGAGGAGAATCGCTTGCAGGCTAAACAAGGAGAAATTGAAGAAATGAAAATCTTGTTGTTGGCTGAAAGAAAGAACTCAAGAAGACGAATTCAAGAAACACTATTTATTTTTGCTTGAAACCAACAGATCGAGGCGTATGTCCTCCACA…	AAGCTTTTATTTTGAACTTTTGAAGGTGCCAATAAACCCTCAAGTGAATTTAGCCTGTTGACCTGAATGCTCCCCAAGAAATCAATCAATCAATTAACCATGAAAAGAAACCAGAAAATCAGCAAGAAAAATCTTGTGGATTGGAATAGGAGAATCCTCAAAATCAGCAAGGAAGAATGTGGCAGAGGTCCAAATTTGAATGTGAAGAGCACTGAAAAACCAAAAGGCAAGAATATCTTGGGGATTGGAAGAGGAGAATCGTTTGCAGGCTAAACAAGGAGAAATTGAAGAAATGAAAATCTTGTTGTTGGCTGAAAGAAAGAACTCAAGAAGACGAAATCAAGAAACACGATTTCTTTTTGCTTGAAACCAACAGATCGAGGCGAATCGCGAATGTCC…
258	Chr01	7668482	7344323	T	TTCAAGTGCATCTATGCGTGCAGCGTGCATAAATCTCAAG	39	TCTGTACGTGTCGTCAACGTAATCCTTGTATTTTGCGGTGTATCAGTACTGTATGAGTGTATGTGTTTATCGATTGATCATTAAGTGAATGAATAATGGATTCTCTCGATTTCAAATGTAACCATGATGATTTTAGACTTGGCTCTATATATCTTAATGGTTCGAATGAAATCCTAAGAAATTTGAGTCGACCAATCATAAACACCGGATGCACGTTTAACGGTTAAAAACAGTGGGACAGAGAAGTCAAGCGGCGTTCTATATGAAGAGAAGAATCATCTGGAGAAGACACTTGAAATCTAATGTTGGGATGATGAGAAATAGTGCAAGGCTATTTAGACTTTTCATGAACAAATATAAATATATTGTGCATCTCTCCTGTTTAGGGAGAGGATTTCA…	TCTGTACGTGTCGTCAATGTAATCCTTGTATTTTGCGGTGTATCAGTACTGTATGAGTGTATGTGTTTATCGATTGATCATTAAGTGAATGAATAATGGATTCTCTCGATTTCAAATGTAACCATGATGATTTTAGACTTGGCTCTATATATCTTAATGGTTCGAATGAAATCCTAAGAAATTTGAGTCGACCAATCATAGACACCGGATGCACGTTTAACGGTTAAAAACAGTGGGACAGAGAAGTCAAGCGGCGTTCTATATGAAGAGAAGAATCATCTGGAGAAGACACTTGAAATCTAATGTTGGGATGATGAGAAATAGTGCAAGGCTATTTAGACTTTTCATGAACAAATATAAATATATTGTGCATCTCTCCTGTTTAGGGAGAGGATTTCA…
260	Chr01	7689905	7365568	CATTTTCGATCTACTTGATGAAACATTTTTGATCTAGTTAGTGAAAC	C	46	TCTGCGTCCAGCTCGCCGCCTCCGCCTCCCTCGCCATCAGATGTTTCCTGTGCGACCGATATTTCTGCACGCAGTACACGCACAAATGCACAATATTAACTACTAGTACTAACTCACAAATACACAGTATGTATCAGCTCAGCTGCTACCGCATAATTGTTTTATCGGGAATGCTAAATAGCTGTCGCATGATTTTTTATAGCTAAATCATTCATATTTCAATATATTTAGAACCGTTGTTTCATATATTGTAGAAAAATGTTTCACGAGATGATTTAATTGTGTTTTAGCTTTTAAAAAGATTGAAACATGTTTGATCTACTTGGTAAAACATTTACGGCGTTTCAGCTTTTTAAAAGATTGAAACATTTTCGATCTACTTGGTGAAACATTTTTTTG…	GATAAAACATGAATAGTACTTTATGTGTGACTAAATGTTTTTAATTTTTTCACAAATTTTTCAAATAAGACGGACGGTCAAACGTTGAACGTGAATAGTGCAAAACTGCACTTATTTTGGGACGGAGGTAGTACTAACTCACAAATACACAGTATGTATCAGCTCAGCTGCTACCGCATAATTGTTTTATCGGGAATGCTAAATAGCTGTCGCATGATTTTTGATAGCTAAATCATTCATATTTTAATATATTTAGAACCGTTGTTTCATATATTATAGCAAAATGTTTCACGAGATGATTTAATTGTGTTTTAGCTTTTAAAAAGATTGAAACATGTTTGATCTACTTGGTGAAACATTTACGGCGTTTCAGCTTTTTAAAAGATTGAAACATTTTCG…
261	Chr01	7729250	7404271	CAAACATGTGCTAAAAAGTTAACGGTGTCAAACATTTTGA	C	39	TATGCTCACTTCGCGCCTGTTGAAAATTTTGGAAACCAGGGCTTAACAATACAGTGGATGTATATTCGGGGTTCGTCCTTTTTCTGAAAGTCATTAAGGCTAATGACGCGACTAATCATGGTTAGGACTCCACTTTAGTTGTAAGTACGGTGCTCATCTAGACGAACAGCGCTTATGCCACTTGCACTTGATGCGATCACACCGTATTCTGCCAAGCAATTACTTTTGACAAATGACGAAGAATCGCATCAATTTTCGCTCCCTTCTCAGGATCAAGGATAAAAGTAAAACCAAACCGAGGTATCATCGCATATACTCCCTCCGTTTTAAAATATTTGACACCATTGACTTTTTAAGTATATGTTTGACCATTCGTCTTATTCAAAAAATTTAAGTAAT…	CCAGTTGAGTTATGCTCACTTCGCGCCTGTTGAAAATTTTGGAAACCAGGGCTTAATAATACAGTGGATGTATATTCGGGGTTCGTCCTTTTTCTGAAAGTCATTAAGGCTAATGACGCGACTAATCATGGTTAGGACTCCACTTTAGTTGTAAGTACGGTGCTCATCTAGACGAACAGCGCTTATGCCACTTGCACTTGATGCGATCACACCGTATTCTGCCAAGCAATTACTTTTGACAAATGACGAAGAATCGCATCAATTTTCGCTCCCTTCTCAGGATCAAGGATAAAAGTAAAACCAAACCGAGGTATCATCGCATATACTCCCTCCGTTTTAAAATGTTTGACACCGTTGACTTTTTAAGTATATGTTTGACCATTCGTCTTATTTAAAAAA…
262	Chr01	7732231	7407202	TTTCTATTACTACGAATCTGGACAAGCAGCATA	T	32	CGGATGATGAGTTATCTGATTTTGCGATAATATACGAGGTACATAACGAATTAACACATTACAACGTTTAAAAAGGTTTATTTTCATTAAGTTTTCAAACAAACTAATAACAGATCAGGGTTTTGGGAAAAAAATTCATCATTTAGGAGCTTATAAATCGTGCCTAATTCGTAAAAGGAAAATAACTAGGCCTAAATAGCTTTGTATTACACGAATAAAGAAGAGGCACTATGACTTTCAGCACTTCATCATCTCAAAATAATCCAACTTTTATATACGAACATGAACATAATATATCCCTAGTTGGTTCAGACGCCTTAAACTGTTTTTATGATCCAGTAAACTGTACTTGTGGTACGTGTCTTTGGCCTCCGCATCAAGTAGGAGTATGTATGCACG…	AGTACTTAACGGATGATGAGTTATCTGATTTTGCGATAATATACGAGGTACATAACGAATTAACACATTACAACGTTTAAAAAGGTTTATTTTCATTAAGTTTTCAAACAAACTAATAACAGATCAGGGTTTTGGGAAAAAAAATTCATCATTTAGGAGCTTATAAATCGTGCCTAATTCGTAAAAGGAAAATAACTAGGCCTAAATAGCTTTGTATTACACGAATAAAGAAGAGGCACTATGACTTTCAGCACTTCATCATCTCAAAATAATCCAACTTTTATATACGAACATGAACATAATATATCTCTAGTTGGTTCAGACGCCTTAAACTGTTTTTATGATCCAGTAAACTGTACTTGTGGTACGTGTCTTTGGCCTCCGCATCAAGTAGGAGTA…
263	Chr01	7865106	7525813	C	CAGGTTATAGCACTCAGAACAGAGTAGCTGCAAAC	34	TCCAAGGGGCCAAGTGATCAGTAAAAAACAAATTCACTAACATTGGAGAAACGAAAATTATGGTACAGGAGAATCACCAGCCATCCTGAAATTCCTGGAAACTCAGTGACATCAAGCCCATGACCAATGAGTGGCTTTACAGTCATCTGAAAATAAGGAGGCTCCACAAAACATAGTCTTACACGGCCAAGAAATGGCCAACTCCGGACAAACTTCACACCGACTAGAATCTGCATGATGAACATATGCATGTTCTGAGTACAATGTAAGGGAAGAAACTGCTTAATGAACGAATATATGCAGAAACTCTATAACTTTTTATCCTGATTTCCTGGGGAGGGTTTTTTACAATAATATTTTGTTAAACAAACAGTTCAGTGCCTCTCTTACATTTTTAGA…	TCCAAGGGGCCAAGTGATCAGTAAAAAACAAATTCACTAACATTGGAGAAACGAAAATTATGGTACAGGAGAATCACCAGCCATCCTGAAATTCCTGGAAACTCAGTGACATCAAGCCCATGACCAATGAGTGGCTTTACAGTCATCTGAAAATAAGGAGGCTGCACAAAACATAGTCTTACACGGCCAAGAAATGGCCAACTCCGGACAAACTTCACACCGACTAGAATCTGCATGATGAACATATGCATGTTCTGAGTACAATGTAAGGGAAGAAACTGCTTAATGAACGAATATATGCAGAAACTCTATAACTTTTTATCCTGATTTCCTGGGGAGGGTTTTTTACAATAATATTTTGTTAAACAAACAGTTCAGTGCCTCTCTTACATTTTTAGA…
265	Chr01	8016005	7691503	ATATATATATATATATATATATGTATGTATGTATGTA	A	36	TTGTGCGGCTACTACGTGTGCGAGTATTGCCACTGCCTTGCAAACCAAATCATCACCACAAGAGAGCTCGATGTACGTACAAATAAATTCAAAATTTCATTACGTATCGATTTGTTGTTTAATTACTAATTAATTTCATACATTCATATAGTTTATTCGCATGAGGGATAACTTTATCACACACAAGGAATTTATCGCGGCGGTTCAAAAACAACTCATGGGATTTATCAACGAACAAATCCTTGATCCCAAGGGTGAATTCTACTACGACGGAAATACAGTTCATAGGTCCTTAGTTTCTGAGATAGCGACTACTACTACGTCGAAATCGTAGCTAGCTAGGACATAATGGATTGTAATTAATACATGTCTATTTTTCTATATACATGTGCACATTTT…	TTGTGCGGCTAGTACGTGTGCGAGTATTGCCACTGCCTTGCAAACCAAATCATCACCACAAGAGAGCTCGATGTACGTACAAATAAATTCAAAATTTCATTACGTATCGATTTGTTGTTTAATTACTAATTAATTTCATACATTCATATAGTTTATTCGCATGAGGGATAACTTTATCACACACAAGGAATTTATCGCGGCGGTTCAAAAACAACTCATGGGATTTATCAACGAACAAATCCTTGATCCCAAGGGTGAATTCTACTACGACGGAAATACAGTTCATAGGTCCTTAGTTTCTGAGATAGCGACTACTACTACGTCGAAATCGTAGCTAGCTAGGACATAATGGATTGTAATTAATACATGTCTATTTTTCTATATACATGTGCACATTTT…
266	Chr01	8227105	7898910	ATATGTAGTCCTTTCCTGGAACCCCCCCCCCCC	A	32	GGGTTGCAATAATGATTTGATCGGTTGTTTGCATGGAACATCATCGGCCTGGACGTTTCATCACAGATTTGGCGCGCACATTATTAGACTCTTAAAGTTTGCCTAACTTTGTTTGTCATAACTATGGCTAACAAATTTGTTACCTAAAATATCGTGGCAAGCCATACTTTTTAAGGTGAGTATTTGATGACTTCAATAATTGGACCGAAAATTTGCCCATAGCTATGCAGGGGAATTAATGATCAATGCAACAATGCAAATGAAAGATCTCACATATGTTTCCCTTTTTTTCCCCGGAAACTGGGACAAATCAACACAAGAAGAAATACCATAATGAAGGGTTTAAATCAGCAGCACACATCAATACAACGATGCGCCGACTTGTAAAGACTGGAGATA…	TTGGGTTGCAATAATGATTTGATCGGTTGTTTGCATGGAACATCATCGGCCTGGACGTTTCATCACAGATTTGGCGCGCACATTATTAGACTCTTAAAGTTTGCCTAACTTTGTTTGTCATAACTATGGCTAACAAATTTGTTACCTAAAATATCGTGGCAAGCCATACTTTTTAAGGTGAGTATTTGATGACTTCAATAATTGGACCGAAAATTTGCCCATAGCTATGCAGGGGAATTAATGATCAATGCAACAATGCAAATGAAAGATCTCACATATGTTTCCCTTTTTTTCCCCGGAAACTGGGACAAATCAACACAAGAAGAAATACCATAATGAAGGGTTTAAATCAGCAGCACACATCAATACAACGATGCGCCGACTTGTAAAGACTGGAGA…
267	Chr01	8460818	8132697	G	GAATTCGTTCATTTGCATCGAAGTCGGGGGCTACTGTCAGGGTTAT	45	GGGGCTATTTCTATCTAATATTCTTTTCTGAGTATTGATTTCAGGAAAATTCTATTCGACATTACCGAAGACTCCATGTCTCTATGGTTCTACACCAAGATCGACTAAGGCGAGTACGACAAATGTCGACAAGGCTCCGTCGTAGACTCTACGCCTTCTCGATCGCTTGAGAATGGTTGCTGGATCTCGACAAGGAATACGGAATGAAGAGATGGTGTACCCGCCGAGATAAAATTTCTTGACTTCAATCCAAATTCTCGATTACAGCAAGACATGAGACTTAGTCGTACGCTCTATACTTTCTCAGTCGACATCAGAGATTAACTTAGACAAACCCTTTCGGTGCCCGCACGAGGCTGACAAAGGAAGTTCAACGTTATCTCTAAACTCACCGAGAAC…	GAAAATTCTATTCGACATTACCGAAGACTCCATGTCTCTATGGTTCTACACCAAGATCGACTAAGGCGAGTACGACAAATGTCGACAAGGCTCCGTCGTAGACTCTACGCCTTCTCGATCGCTTGAGAATGGTTGCTGGATCTCGACAAGGAATACGGAATGAAGAGATGGTGTACCCGCCGAGATAAAATTTCTTGACTTCAATCCAAATTCTCGATTACAGCAAGACATGAGACTTAGTCGTACGCTCTATACTTTCTCAGTCGACATCAGAGATTAACTTAGACAAACCCTTTCGGTGCCCGCACGAGGCTGACAAAGGAAGTTCAACGTTATCTCTAAACTCACCGAGAACGGTCACATGAGCTCGATAACAGTTACTCCAATGTCTGCGCGCGG…
268	Chr01	8747090	8321532	TTCATGATTTAAAAATACTACATATATTTAGT	T	31	GACGACGCCGTCGACGTCGGCACGGTGAGGAAAGACGACGACGCCGCGTCGGCGCCGACCAGCCGGCGCTGCATCGTGGTCGACGTGGAGTCGACGCCGTGGCAGAAGCTGCGTATGCCGCTGCGGCGCCGCATGGTGTAGACACTAATCGAGATAGAAGAGGGGATCGATCGACGCCATGTCAGGTTTGGTTGGAGAAAAGTATATAAGCTTAATTAGGCGTGTACGCGTGTACGTGGATCGGAGGAGGTTGGCGCGGGCGCTCGTGATAGGGTTTAAAACGGGATGGGGATCGTGCGGCGTCGACGCATGAGTCGAGTGAATGTGATGTGGAGGTGGAGGTGGCGCAGCAATTGGGATCACATGAGAGGAACGTACGTCTCATGTGCCTACGTATGA…	GACGACGCCGTCGACGTCGGCACGGTGAGGAAAGACGACGACGCCGCGTCGGCGCCGACCAGCCGGCGCTGCATCGTGGTCGACGTGGAGTCGACGCCGTGGCAGAAGCTGCGTATGCCGCTGCGGCGCCGCATGGTGTAGACACTAATCGAGATAGAAGAGGGGATCGATCGACGCCATGTCAGGTTTGGTTGGAGAAAAGTATATAAGCTTAATTAGGCGTGTACGCGTGTACGTGGATCGGAGGAGGTTGGCGCGGGCGCTCGTGATAGGGTTTAAAACGGGATGGGGATCGTGCGGCGTCGACGCATGAGTCGAGTGAATGTGATGTGGAGGTGGAGGTGGCGCAGCAATTGGGATCACATGAGAGGAACGTACGTCTCATGTGCCTACGTATGA…
271	Chr01	8958606	8513112	C	CATCACCGCGTCCCTCAATAAGGTTCACTAGTTTCATC	37	AGCCTATGCAACATGCTCTAGGCGTAGTTGAGGTCGACAAACGACCACCGCCGGCGACAAGCTAGAGCTAGAGCTCGCCTGGTAGAGATGGTAGTGGCAATGGTGGCCAATGAGCCCATCCATTGTTGCTAGGCACATCACCCCCAACTATGCGTCCATCTGCTACCATTGATCACGTTGGCTCTGGTAGTCGAGCTTGCTTCAATCGCACAAAGTCGTTAGCGTCAAGGACTATGTTACGGAGCTCAAACATATGCTATAGGTGGTCGAGACAGAGCTTGCAAGTGTGCAAGTGGAGTTGGAGATGGAGAGGACCAAGAAGAATGCCACCGTGCCTCCCCCACCACGCCTCGCTGCTCGGCTGCTTGCGTCCTCGACGAGGTCGGACGTTGCAGCTGC…	GAGCCTATGCAACATGCTCTAGGCGTAGTTGAGGTCGACAAACGACCACCGCCGGCGACAAGCTAGAGCTAGAGCTCGCCTGGTAGAGATGGTAGTGGCAATGGTGGCCAATGAGCCCATCCATTGTTGCTAGGCACATCACCCCCAACTATGCGTCCATCTGCTACCATTGATCACGTTGGCTCTGGTAGTCGAGCTTGCTTCAATCGCACAAAGTCGTTAGCGTCAAGGACTATGTTACGGAGCTCAAACATATGCTATAGGTGGTCGAGACGGAGCTTGCAAGTGTGCAAGTGGAGTTGGAGATGGAGAGGACCAAGAAGAATGCCACCGTGCCTCCCCCACCACGCCTCGCTGCTCGGCTGCTCGCGTCCTCGACGAGGTCGGACGTTGCAGCTG…
272	Chr01	8969557	8524889	TAACAATCTAGCTTATAGTAATCTAACTCAATAATCTAGATTATA	T	44	CCGCCGCCGCCGTCGTCCGTCCCTATCAACTTTCTCTTTCAATCTGTTGTGTTTAGGTTATCTGATTGGGGTTGGGGTATATATGAACCGGAAAAATATATATACTCATGTAATCCGTGTCCTAAAACATCTCCGTCTCCGATCTGTTTGGTTATCTGATGCGGATTGGCTCGCACGCGCGCGCGGGTCACGAGGCTGGTTTCGGTCAAGCAAAAGTTGCAAAACGGATGTGGATTTTCATCTCTGCACTTAGGCCCTGTTTCTTTCAACTTAGGATTATTATAATCCAGATTATTAGGAGTAAGCTGAAAGAAACAGATAATTTATTGAAGTAGCTTATTATAATCTGATAAGCTCATTTAGGTGAGCTTTTTCCAGATTATTGGGTGAAAAATTACC…	CCGCCGCCGCCGTCGTCCGTCCCTATCAACTTTCTCTTTCAATCTGTTGTGTTTAGGTTATCTGATTGGGGTTGGGGTATATATGAACCGGAAAAATATATATACTCATGTAATCCGTGTCCTAAAACATCTCCGTCTCCGATCTGTTTGGTTATCTGATGCGGATTGGCTCGCACGCGCGCGCGGGTCACGAGGCTGGTTTCGGTCAAGCAAAAGTTGCAAAACGGATGTGGATTTTCATCCCCGCACTTAGGCCCTGTTTCTTTTAACTTAGGATTATTATAATCCATATTACTAGGAGTAAGCTGAAAGAAACAGATAATTTATTGAAGTAGCTTATTATAATCTGATAAGCTCATTTAGGTGAGCTTTTTCCAGATTATTGGGTGAAAAATTACC…
274	Chr01	9185084	8736030	C	CAGATATATATATATATATATATATATATATATATATATATATATATATATATAT	54	GTAGTACTAGTATTACACTCTGTATGATCCCATGTTTTTCCGCATGTAAGATAGATAATGTCAAACATACTATGCAGCTGCACACCATGAAAATCGGGAAATGATAATAAAATCTTGAGAGGATATGTATAACCTCTCGTCTTTTTTAATGTCATCTAAATAGCTATTAAATTTTTTAACAAGATAGATTAATATGTGATATATCACTTTATAGATATGTAAATTCAAATACTACTAATTTCGAGGAACTGAAAATTAATTGATTCAACGTGAGATCATGATCATGCTGTGATTTTTTTTCTGCATTTTGTAAGTTTGAGGGATAGGTGTGGTAAATTGAGTGGTCGATTCATTAACCATCACGTTCATCAAAACAATTAATTTTTTTAAGAAAATGGA…	GTAGTACTAGTATTACACTTTGTATGATCCCCTGTTTTTCCGCATGTAAGATAGATAATGTCAAACATACTATGCAGCAGCACACCATGAAAATCCAGAAATGATAATAAAATCTTGAGAGGATATATATAACCTCTCGTCTTTTTTAATGTCATCTAAATAGCTATTAAATTTTTTAACAAGATAGATTAATATGTGATATATCACTTTATAGATATGTAAATTCAAATACTACTAATTTCGAGGAACTGAAAATTAATTGATTCAACGTGAGATCATGATCATGCTGTGATTTTTTTTCTGCATTTTGTAAGTTTGAGGGATAGGTGTGGTAAATTGAGTGGTCGATTCATTAACCATCACGTTCATCAAAACAATTAATTTTTTTAAGAAAATGGA…
276	Chr01	9200566	8751359	GAAGCTATAAAGTTGAGAATAAAGGAATATAGGTCAAGGGT	G	40	AGTGTAAAAACTCTCACAGTCGATGGAATTTCAGAGCTGAATGGACAGTCATGGCACATGGCAGTTTGAGCCGTAGCGTCCAAATACAAGATACAGATACAAGACAAGCCTTCAGGCTAAGTTTGATGTGTACAACAGCACAAGATCATCGTACCAAATCGAAGTACTGATCTAAAAAAAAATCGAGGCATATTTTGCAGTACATCAGAATGGTTGTGTGGCAAACAGAAAAATATACACTTTACTACGGAGGTATAGGCAATAAAAATCACTAAAATTTCGAACTTTTTAAAACTTTTGCATCATGTTGGTGTTATTCGTTTCTCTATTGCAAATATATTGTTTAAATTAAATAATATAAGATAAGTAAGTTGAGATGGAAGTCAAATAATAAAATCC…	GTTTGAGCCGTAGCGTCCAAATACAAGATACAGATACAAGACAAGCCTTCAGGCTAAGTTTGATGTGTACAACAGCACAAGATCATCGTACCAAATCGAAGTACTGATCTAAAAAAAAATCGAGGCATATTTTGCAGTACATCAGAATGGTTGTGTGGCGAACAGAAAAATATACACTTTACTACGGAGGTATAGGCATTGCAGCAGCACTGTCCTATGACACGTGGCTTCTCAGATGTAACGTACTAAAAATCCTCAATAATAAAAATCACTAAAATTTTAAACTTTTTAAAACTTTTGCATCATGCTGGTGTTATTCGTTTCTCTATTGCAAATATATTGTTTAAATTAAATAATATAAGATAAGTAAGTTGAGATGGAAGTCAAATAATAAAATAC…
277	Chr01	9205104	8755730	G	GTGATAAATTTAGTGTTAAATCTGTAGTTTTG	31	ACGAATCAATGGGATACAACAACGTTTCAATGCTTAGGAAATCCTCTTCGTAGTTGCATTTCAACAAGCCAACCCACCTGGCTTAATCTTTTCAAACGCATACATAAGCTTAGTTGAAATTAAGGGGGGTATCAGAAGAGATCCTAAGGTCGGGCTTAATAGTGAATAGTGATCCTGAAATCAGCATATTTCTGGATTTTTTTTCTGAGTAAATTTCATAAAACTATAGATACTTTGATTAAATTATTACAAAACTACAAATTTAAGTTAATGTATCACAAAACTACAGGTTTAAGGCTAAATATCGCAAACTACAAATTTAATAATAAAACTATCACAAAACTACAGATTTTAGAGTTTAAATCCTTAAGCACTAATGCTATGTTTGAGTTATGATGT…	GAATCAATGGGATACAACAACGTTTCAATGCTTAGGAAATCCTCTTCGTAGTTGCATTTCAACAAGCCAACCCACCTGGCTTAATCTTTTCAAACGCATACATAAGCTTAGTTGAAATTAAGGGGGGTATCAGAAGAGATCCTAAGGTCGGGCTTAATAGTGAATAGTGATCCTGAAATCAGCATATTTCTGGATTTTTTTTTTCTGAGTAAATTTCATAAAACTATAGATACTTTGATTAAATTATTACAAAACTACAAATTTAAGTTAATGTATCACAAAACTACAAGTTTAAGGCTAAATATCGCAAACTACAAATTTAATAATAAAACTATCACAAAACTACAGATCTTAGAGTTTAAATCCTTAAGCACTAATGCTATGTTTGAGTTATGATGT…
280	Chr01	9241657	8785663	A	ATATATATATATATATATATATATATATATATAT	33	TCCTAATAAATACAATACATGCATCTAATAGAATTAGAGGATGTAAGAGTGAATGATTTAAAGAATTAATAATTTAATGGAGAAGATGTCATAGTTAATTGTATGCATGCATGTATGCCTTATATTATGGAACATCTAAAAAAATGGTTGTGCCTTATATTATGGAATGGAGGGAGTATATACAACAAATAAATACATGTTTACTTTTTTAAAGAAAAAGCGCAGAGACCAAGGACAATAAAAATCTTCATTCTATAATTAATTATCATCAATTAAGGTGCTACGATGCATCGTCTTCCATGAATTGCTTCATGTTTTAAATATTTCACGGTTGCACCGATAGAAATTAATTTGGTTGGTAACATGCAGTGCATTCAATGATGTTTATTTACTCTTTGC…	TCCTAATAAATACAATACATGCATCTAATAGAATTAGAGGATGTAAGAGTGAATGATTTAAAGAATTAATAATTTAATGGAGAAGATGTCATAGTTAATTGTATGCATGCATGTATGCCTTATATTATGGAACATCTAAAAAAATGATTGTGCCTTATATTATGGAATGGAGGGAGTATATATAATAAAGAAATACATGTTTACTTTTTTAAAGAAAAAGCGCAGAGACCAAGGACAATAAAAATCTTCATTCTATAATTAATTATCATCAATTAAGGTGCTACGATGCATCGTCTTCCGTGAATTGCTTCATGTTTTAAATATTTCAAGGTTGCACCGATAGAAATTAATTTGGTTGGTAACATGCAGTGCATTCAATGATGCTTATTTACTCTTTGC…
281	Chr01	9255317	8799333	G	GGGAGACCAGGATAAAAAACCATATAACTCAACGGTTAATTAAG	43	GGGAGCGGCGGGGGGAGCGGCGTGGACGGGCCGAGCAGGAACGACGGGGCGTCCGGGAGCGGGGTGGCCGGCGCGGGCCGCGGGCTCGGTGTGGACGCGGCGCCGAGGAAGGCGGTCGTCGTCTCGGTGGCGTCGGGTCGCCGGGGAGGCTGTGTCATGTGGCGGTCGGCGGCGCTGCCGCCGGGGCAGCGCGGCGGCGGCGGCGGCGGCGGCGGCGGTCGTCTGGTCGGGGCGGGGAACGGCGCGGCGGCGGCGGCGGCGACGGCGGTGGCGAGGAGAGGGAACGCGCGACGTGCGGTTGGGAGAGGGGACGCCTTAATTTTGGAGAGGAAACCACACCGGCGTGCGTTGGCGCCAACTGATGGCCTTGCATGAAACGAGGAGGCCGTCAAGGTATTG…	GGCGGCGGGAGCGGCGGGGGGAGCGGCGTGGACGGGCCGAGCAGGAACGACGGGGCGTCCGGGAGCGGGGTGGCCGGCGCGGGCCGCGGGCTCGGTGTGGACGCGGCGCCGAGGAAGGCGGTCGTCGTCTCGGTGGCGTCGGGTCGCCGGGGAGGCTGTGTCATGTGGCGGTCGGCGGCGCTGCCGCCGGGGCAGCGCGGCGGCGGCGGCGGCGGCGGTCGTCTGGTCGGGGCGGGGAACGGCGCGGCGGCGGCGGCGGCGACGGCGGTGGCGAGGAGAGGGAACGCGCGACGTGCGGTTGGGAGAGGGGACGCCTTAATTTTGGAGAGGAAACCACACCGGCGTGCGTTGGCGCCAACTGATGGCCTTGCATGAAACGAGGAGGCCGTCAAGGTATTG…
282	Chr01	9266939	8810967	GTAGTGTAAATAAGGGAAGTCCTATAGAGTTGTTGGTAGTGCAGTAGTGTGG	G	51	TCTACAATCTCTAGTAGAGTTGTTTGTTAACCTGGAGGTATTGGAGAGATTTTGCAGAATATATAACAAGCCATCCAAATTAGTTAAACGAAGGTGTCAACTAAAATGAACACACTGTACAACATGAACATAATGAGGCCAAAATGTGCGTGGGAGCTGGCTTAGGGTTGAAGTACATTATAGGTTGGGTATAATGGACTATTGGAGTTTAACAAGATGGGATGGGATTGAGGTCTCACTTCATTACCAGGGCTATGAAGATAACATGTGTCTGTCTGTATTCTTCTTGTTTCTATATGGCGGGCCTGGAGTTTTTTTTTTCTCGAAAACGCAGGAGAGCTGCATTTCATTTCATTAAGGGGAAGAAAAAACAATACAAAAACACACCACAAAGAAAAA…	GTTTCTACAATCTCTAGTAGAGTTGTTTGTTAACCTGGAGGTATTGGAGAGATTTTGCAGAATATATAACAAGCCATCCAAATTAGTTAAACGAAGGTGTCAACTAAAATGAACACACTGTACAACATGAACATAATGAGGCCAAAATGTGCGTGGGAGCTGGCTTAGGGTTGAAGTACATTATAGGTTGGGTATAATGGACTATTGGAGTTTAACAAGATGGGATGGGATTGAGGTCTCACTTCATTACCAGGGCTATGAAGATAACATGTGTCTGTCTGTATTCTTGTTTCTATATGGCGGGCCTGGAGTTTTTTTTTTCTCGAAAACGCAGGAGAGCTGCATTTCATTTCATTAAGGGGAAGAAAAAACAATACAAAAGCACACCACAAAGAAAAA…
283	Chr01	9290125	8834117	AAATTCTACTTGAACACTACAAGATCTACTTG	A	31	GGATGGAGTAATTTTTTTTAACACAAGGAAGTACGTGGGCACAGAGAATGAGTAAATCTCTTACATTATCATGCTCCTATTGAAAAAAAGCTTACGGGTGTGTAATATCGTGAATATCAGAATTAACCATGTGCAATGATGAATTTAGAAAAAAAAATCAATCATACTTTGCCTCGATATATCGCATACATCTATAATACTGTCTTCGGTTTTTAACGTATAACAATGTTGATTTTTGAGTTTTGACATAACTTTGATCTTGCGTTTTATTATGAAAAATACATAGTTATTAGTTTTTTGTTATAATTTGTTCTACCATTAAGGATATTTTAAAAATATTTTTTTATATTTGCATAAAATTTTAATTAAGATAAGATAAAATTGGATATGAGATACATC…	TGGATGGAGTAATTTTTTTTAACACAAGGAAGTACGTGGGCACAGAGAATGAGTAAATCTCTTACATTATCATGCTCCTATTGAAAAAAAGCTTACGGGTGTGTAATATCGTGAATATCAGAATTAACCATGTGCAATGATGAATTTAGAAAAAAAAATCAATCATACTTTGCCTCGATATATCGCATACATCTATAATACTGTCTTCGGTTTTTAACGTATAACATTGTTGATTTTTGAGTTTTGACATAACTTTGATCTTGCGTTTTATTATGAAAAATACATAGTTATTAGTTTTTTGTTATAATTTGTTCTACCATTAAGGATATTTTAAAAATATTTTATATATTTGCATAAAATTTTAATTAAGATAAGATAAAACTGGATATGAGATACATC…
284	Chr01	9335724	8879698	C	CGGACGACCGCGATAGTTCGAGGGTGTAATTC	31	GCCGTCCACACCGTCCTCGTCGACCGTCCGTCCCCGCGCCATCCTCGCCGACCGCCCGCGCCCACCGCCCGTCCTCGCCGTGCGCGCTGCGCGCCGGCCTTCTCCACCCCTGCCAGTCGCGGGCCTCGGCTCCTCGACCACCGCCCGCCGCCTCCTCCGCCCCCGCCCGTCGCCAGCCTCGCGCCCACCCGCCGCCCGTCGCCGACCTCAGCTTCTCGCCCGCTGTCGCCGACCCACCCGTGAATGAGAGAGAGGAAAAGTGAGGCATAGATTGAGAGAGAGAAGAGAGAGAGGAAGAGTATGACATGTGGGTCCCGCAATTTTTTTTTATAAATACAATGCTGACTAGACTGCCACGCGTACGCCACGTAGACCAAAACCACCATGGATTGAACCAGG…	ACCGCCCGTCCCCGCGCCGTCCTCGCCGACCGCCCGCACCCACCACCCGTCCTCGCCGTGCGCGCTGCGCGCCGGCCTTCTCCACCCCCGCCAGTCGCGGGCCTCGGCTCCTCGACCACCGCCCGCCGCCTCCTCCGCCCCCGCCCGTCGCCAGCCTCGCGCCCACCCGCCGCCCGTCGCCGCCTCCGCCCCTGCCCGTTGCCGGCCACAGCTCCTCGCCCGCCGCCGCCGACCCACCCGTGAATGAGAGAGAGGAAAAGTGAGGCATAGATTGAGAGAGAGAAGAGAGAAAGGAAGAGTATGACATGTGGGTCCCGCAATTTTTTTTTATAAATACAATGCTGACTGGACTGCCACGCGTACGCCACGTAGACCAAAACCACCATGGATTGAACCGGG…
285	Chr01	9355037	8899088	GCTCGTCGCGCCGCCGCCACTCGCCGCCGTCTGCCGCCGCCG	G	41	CCTCCTCTCTCTTTTTCGTTTTGCAATCGCCCGCTCCCGTGCACTCCACCGCCCTAGCACCGTCCCCCTCCTTTCCACCGCCGCCGCCACCGCTCCGGCCGCCGCTAGCCGTCGCTAGCCGCTGCGCCAAGTCACGCCGTCGACGTCGTCGCGTTCGCCGTCGTGCGGGCCACCCCATCCACCCCCCTCCCGTTGGATTCCGCCGCCGGAACCCACTCCGCACCGTGTGCCGGTGAGTTCGGCCGTGGCCGCCGCCTTCGGCCGGTGTTCCCGCCATCGGTGATCTTTCTCTTCCCCTCTAACTTCTCCCATTTTGTTTCTTAGGTCGTCCCGGACCCCGTCCGCCGCTTGTCGACTTCCCTCTGTCGAGTCTCGCCGCCGTTCACCGTCGTCTCCCTC…	CCTCCTCTCTCTTTTTCGTTTTGCAATCGCCCGCTCCCGTGCACTCCACCGCCCTAGCGTCGTCGCCCTCCTTTCCACCGCCGCCGCCACCGCTCCGGCCGCTGCTAGCCGTCGCTAGCCGCTGCGCCGAGTCACGCCGTCGACACCGTCGCGTTTGCCGTCGTGCGGGCCACCCCATCCACCCCCCTCCCGTTGGATTCCGCCGCCGGAACCCACTCCGCACCGTGCGCCGGTGAGTTCGGCTGTGGCCGCCGAGTTCGGCCAGTGTTCCCGCCCTCGGTGATCTTTCTCTTCCCCTCTAACTTCTCCCATTTTTTTTCTTAGGTCGTCCCGGACCCCGTCCGCCGCTTGTCGACTTCCCTCTGTCGAGTCTCGCCGCCGTTCACCGTCGTCTCCCTC…
286	Chr01	9397046	8941639	A	ACGGAAATCAGGTTTGTCTTTTTGGGTTTGTTT	32	CGGCGGTGGGTCGGGGATGTGTGGTGCGGCCGCCGGCGGCTAGGGTTTGGGAATTGGGATGGCCTTCCCAGAGACTGAATTGGGGCTGTATTAATGGGCCCTAATCGGGCTGTATAATTTCGGCCCGAGAAATATGCAAGTTCACTTTAGGTCCCTTATGTTCAACTTGTAAAAGCGGTGATTATCGATGTCTCGAGTCCAGTTTTAACTGATGTGACAAGTGGGATCTACGTGGGCCCTACATGTTAGGGCTAGATGGGGGACCTAGTATTGGTCCGGAAACAATTCGGCCCGTATTTATTATTGAGTACATCTTCAAGAGTACTCCCTTCGTCCTAAAAAAAACAAACGTTTGAGTGTCCGTCTTATATGAAATTTTTTTATAATTAATATTTTCAT…	ACGGCGGTGGGTCGGGGATGTGTGGTGCGGCCGGCGGCGGCTAGGGTTTGGGAATTGGGATGGCCTTCCCAGAGACTGAATTGGGGCTGTATTAATGGGCCCTAATCGGGCTGTATAATTTCGGCCCGAGAAATATGCAAGTTCACTTTAGGTCCCTTAAGTTCAACTTGTAAAAGCGGTGATTATCGATGTCTCGAGTCCAGTTTTAACTGATATGACAAGTGGGATCTACGTGGGCCCTACATGTTAGGGCTAGATGGGGGACCTAGTATTGGTCCGGAAACAATTCGGCCCGTATTTATTATTGAGTACATCTTCAAGAGTATTCCTTTCGTCCAAAAAAACAAACGTTTGAGTGTCCGTCTTATATGAAATTTTTTTATAATTAGTATTTTCATT…
289	Chr01	9441076	8991051	TGAAGGCCCACTCTTGTAACAAATAAGGGCCCACTCAATTTT	T	41	AGACAGATAGCCGGGCACGACTAGCTAGCCGACATGTGTTAGTCCGTAGTGGTACGCCGAGCGTGACATCGACCAGATAGCCTCTGAGTTCATCGATACATGATTGTTCTTAATTTGATTAATCTAGCTAGTGTGGAATGCCGCGCATTATTAATGTCGGATATACATTATTAATGTCGGATATGATTGCGTGTTTGTTTACTCTCAAGCTTGGATTGGTTTTTTTTTCCATTGTTCTTTAGTACTGTTTGTATACTTGTAGTATAGCTCGTGTCCTCCCTATTCATATCAACTTGCGTGGAATAAAAATCAGAAATTGCATGATACCGTGAATCAAAAAAAATATCACCTCTGATCACATGTGCATTGTGCCCCAGAGCGCACTGTCTTAATCGATAA…	AAGACAGATAGCCGGGCACGGCTAGCTAGCCGACATGTGTTAGTCCGTAGTGGTACGCCGAGCGTGACATCGACCAGAGAGCCTCTGAGTTCATCGATACATGATTGTTCTTAATTTGATTAATCTAGCTAGTGTGGAATGCCGCGCATTATTAATGTCGGATATACATTATTAATGTCGGATATGATTGCGTGCTTGTTTACTCTCAAGCTTGGATTGGTTTTTTTTCCATTGTTCTTTAGTACTGTTTGTATACTTGTACTATAGCTCGTGTCCTCCCTATTCATATCAACTTGCGTTGAATAAAAATCAGAAATTGCATGATACCGTGAATCAAAAAAAATATCACCTCTGATCACATGTGCATTGTGCCCCAGAGCGCACTGTCTTAATCGATAA…
291	Chr01	9453343	9003373	C	CGACGACGGAGGCGGCGCGTCGTGGAGACAGAA	32	TTTGGAAGTTTAGTTGAAATTGGTACGATGTGATAGAAAAATTATGTGTGTGTGAAGAGAAAATTGCATATCTACCATTATATAAGATTGGCTTCGCAGAAATACCATCACTTACATCGGCTTCGCTAGAATACCACTCCCAACTAGAACGGCTTCGCCAAAATGCCATTTTGGACAAAAATGGCCCTGGTTCTTCTCCCTTCCTCCAATGCCGGAGGAGCTCGTCGGCAGCCACCGGTGCCACCTTGCCGGCGACGATGGGGGCGCTGCCCTCCTCGTCGTCCCCACCTTTTCATCCTGCCCGTCATGCTAGGAGGAGGCCTCAGCCGACATCATCAACATGGGGATGAACTCATCGGCGACGGAGGCGGGGTGGACGAACTCTCCGGCGATGGGGGT…	AGTTTGAAAGTTTAGTTGAAATTGGTATGATATGATAGAAAAGTTGTGTGTGTGAAGAGAAAATTGCATATCTACCATTATATAAGATTGGCTTCGCAGAAATACCATCACTTACATCGGCTTCGCTAGAATACCACTCCCAACTAGAACGGCTTCGCCAAAATACCATTTTGAACAAAAATGGCCCTGGTTCTTCTCCCTTCCTCTAATGCCGGAGGAGCTCGTCGGCAGCCACCGGTGCCACCTTGCCGGCGACGACGGGGGCGCTGCCCTCCTCGTTGTCCCCACCTTTTCATCCTGCCCGCCGTGCTAGGAGGAGGCCTCAGCCGACGTCATCAACATGGGGATGAACTCATCGGCGACGGAGACGGGGTGGACGAACTCTCCGGCGATGGGGGT…
293	Chr01	9491561	9046101	GCTAAATATAACTATACGTAGACAGAAAGTT	G	30	CTGGTCTCTCTCGAACTCTGACATCACGTGCAGGCAAATTAAACACATCATCGATCGATCAGACTACACAATGATTTTGCTCCTAATTAATCTCAGCCGGAGACCGCAGCTGATTAAATGCGTAATGTAATTCAGGTCAGGTTGCATGCATGCAGCATAGGATCCGATGATTATTTTGCTTAAAAACATCATTAACTCGATTGTTATCAATCACATCACAAGCATATATATGTGGCTCGATCCAGTATACGTACGTTCATCTCTCTGTATGTATGTCGTACGTATATACTGTACCGTACGTGCGTCATCGTCATCAGGAGGGAAAAAAACACGTTACACGTGCACGCCTTTGTCTGATTTTCGCATGGCGACGCCAGATCCACGCAGGCATATCATAGT…	CTGGTCTCTCTCGAACTCTGACATCACGTGCAGGCAAATTAAACACATCATCGATCGATCAGACTACACAATGATTTTGCTCCTAATTAATCTCAGCCCGAGACCGCAGCTGATTAAATGCGTAATGTAATTCAGGTCAGGTTGCATGCATGCAGCATAGGATCCGATGACTATTTTGCTTAAAAACATCATTAACTCGATTGTTATCAATCACATCACAAGCATATATATGTGGCTCGATCCAGTATACGTACGTTCATCTCTCTGTATGTATGTCGTACGTATATACTGTACCGTACGTGCGTCATCGTCATCAGGAGGGAAAAAAACACGTTACACGTGCACGCCTTTGTCTGATTTTCGCATGGCGACGCCAGATCCACGCAGGCATATCATAGT…
294	Chr01	9494920	9056823	ACATGAGGGCGATTCGTTGGTGAGTAGCTCGA	A	31	CCCAAGTACATCATTAGTATACATCATATTCCATCTTCAACTTATCTTCATGTCATCAGCCTTTGGCCCTTAGGGGCATTATTATATCGGATTGGCTACTCTTCTGTCGACAGATTTTGCTGGGCTCCATCTTTCGTTTTTTGGGCCGTCCATCATGTTTAAGATTCGTGCAATAATTGGGTTGTGGGATGGACTTCTCTGTTTGGGCTACCGATCTTTTTTATCTATTGGGCTGGCCTTTTTATTGATTCCTCGTGGGTCCCACAGCAACTGTTCAATTTTGAAATCCGCGCCTACTTTTTTCTTGTCTCTTCTGTGGGTCCCACATTTGCTGAATTTTCTCGTTTCTTCCGACATAGATAGATAGAGAGAGAGAGAGAGAGAGAGAGAGAGAGAGAG…	CTGCCATTACCCCAAGTACATCATTAGTACACATCATATTCCATCTTCAACTCATCTTCATGTCATCAGCCTTTGGCCCTTAGGGGCATTATTATATCGGATTGGCTACTCTTCTGTCGACAGATTTTGCTGGGCTCCATCTTTCGTTTTTTGGGCCGTCCATCATGTTTAAGATTCGTGCAATAATTGGGTTGTGGGATGGACTTCTCTGTTTGGGCTACCGATCTTTTTTATCTATTGGGCTGGCCTTTTTATTGATTCCTCGTGGGTCCCACAGCAACTGTTCAATTTTGAAATCCGCGCCTGCTTTTTTCTTGTCTCTTCTGTGGGTCCCACATTTGCTGAATTTTCTCGTTTCTTCCGACATAGATAGAGAGAGAGAGAGAGAGAGAGAGAGAG…
295	Chr01	9518230	9066739	TACTATATCATGATGTTTGTGGCTACAGTAT	T	30	TCTATATATTTGAGTACGTGTGTGCTTGTGTGTGGTAATGAATCTGCATATACGTACTCCGTCCTGCCTCTTCTTGCTCAGCTCATTCACCATCTCTGACTCTGAGTGAAATCTTGCCCACTAAATCCATACAACTTTTTTTTCACCATTTCCGATCCCGTATAGTTTGTGACGCTAATTAATTAATAAGCAAGTGCAATTTCGTTCGAGTGATCGTGTGGATAGTGATTATGTACGTATCCGATTTTGTGTGGCATTTGGATGCCCGAAACAAAATTATTGACTTTTGGTAGCAGGACTGATTAACCCGGAATCAAATTACGTCCGAAGAGACCAAATCAAAGAAAGACCATTTGTGTGGACCATATTCACTCAGCGGTACGATTTCGGTGCTAAAAA…	TATATATTTGAGTACGTGTGTGCTTGTGTGTGGTAATGAATCTGCATATACGTACTCCGTCCTGCCTCTTCTTGCTCAGCTCATTCACCATCTCTGACTCTGAGTGAAATCTTGCCCACTAAATCCATACAACTTTTTTTTTTCACCATTTCCGATCCCGTATAGTTTGTGACGCTAATTAATTAATAAGCAAGTGCAATTTCGTTCGAGTGATCGTGTGGATAGTGATTATGTACGTATCCGATTTTGTGTGGCATTTGGATGCCCGAAACAAAATTATTGACTTTTGGTAGAAGGACTGATTAACCCGGAATCAAATTACGTCCGAAGAGACCAAATCAAAGAAAGACCATTTGTGTGGACCATATTCACTCAGCGGTACGATTTCGGTGCTAAAAA…
296	Chr01	9548193	9109533	ATATATATATATATATATATATATATATATATATATATATATATATATATATATAT	A	55	TGTGTTAGTACCTCTTATATTTCATATATTACTAGTAGTATATTTTAAGAGAAATAATTTTGATTCGACACGTCCTCTGAATTAATTTCCCTATCTACATACTATTAGTACTAATTTATTTGTACTTCATATAAAGGGGCATGTAGTTCCGTTATCACAAGTCATAACAGAATAAAAGCGACATGTATATATATATGCTCACACACGTCGACAGACATTTTAGCGTGCGACACGCCAAACTTTGCGTCGACACATGGGTGGTCAGAGCTGCCACCATTAATTATTCTTTCCCCTTCATTGCTTTAACTAATTAATTTAAGTACATGGCGCCGTCACATTATGCACATAACTATAATTATAATAATTAAGTAATATGTTGTCCTGTTTCCTTTTCTTAGG…	TGTGTTAGTACCTCTTATATTTCCTATATTACTAGTAGTATATTTTAAGAGAAATAATTTTGATTCGACACGTCCTCTGAATTAATTTCCCTATCTACATACTATTAGTACTAATTTATTTGTACTTCATATAAAGGGGCATGTAGTTCCGTTATCACAAGTCATAACAGAATAAAAGCGACATGTATATATATATGCTCACACACGTCGACAGACATTTTAGCGTGCGACATGCCAAACTTTGCGTCGACACATGGGTGGTCAGAGCTGCCACCATTAATTATTCTTTCCCCTTCATTGCTTTAACTAATTAATTTAAGTACATGGCGCCGTCACATTATGCACATAACTATAATTATAATAATTAAGTAATATGTTGTCCTGTTTCCTTTTCTTAGG…
297	Chr01	9559094	9120410	GCAGGTGTTTGCTTAGGTGGCTTCGTGTATCTCAT	G	34	GTAAACTTGAATCATGCATAAAAGTTAACTTATTTTAGAATAGACAGAGGGAGTAATATAATAAATTTAACTCTATCTTCTTACCTCTCTTGGTTTGTAAATTGATCGATTTTATTCCTTTAATACTCTTACCTACTATCGACCTGCTCCCTCTGTTTTAAATAAATCAACTTTTTATCTTGATTCTGGAATAGCCTATATTCAAATTCGTATATAAAAGATAATTTATATTGGGCCAAAGAGAGTATTAATGATGATACTTTGTTCTTTTTTTCATTCACCTTGTTTTGAACACACCCTAGACTAAAACTGAAGTTATTTTGATATAGAGGGAATACTTTAGTTCTGAACACAGGGATATACTCCCTTCATCTACAAATATAGAGATTTTAAGTTTAA…	GTAAACTTGAATCATGCATAAAAGTTAACTTATTTTAGAATAGGCAGAGGGAGTAATATAATAAATTTAACTCTATCTTCTTACCTCTCTTGGTTTGTACATTGATCGATTTTATTCCTTTAATACTCTTACCTACTATCGACCTGCTCCCTCTGTTTTAAATAAATCAACTTTTTATCTTGATTCTGGAATAGCCTATATTCAAATTCGTATATAAAAGATAATTTATGTTGGGCCAAAGAGAGTATTAATGATGATACTTTGTTCTTTTTTTCATTCACCTTGTTTTGAACACACCCTAGACTAAAACTGAAGTTATTTTGATATAGAGGGAATACTTTAGTTCTGAACACAGGGATATACTCCCTTCATCTACAAATATAGAGATTTTAAGTTTAA…
298	Chr01	9572937	9134225	TAGAGCGAAGGGTATTGGTTAGCGCAACCGAAAT	T	33	GTGCTGTTTCTAAAAGCGGCACACATTTGGTACGGAGTACATAGCCTTTTCTTTCTTTTTTTTTTCATCTTTTTCTCCGGTCAAAATTGCGGTTACTACGACTAGTAACTTTTTAGTGGAGTAATAACTCCCCATCTTTATTCGCCAAAAAATACTTTTGTCTTATATCAGCCGGTGGCCGCTCCCTCTTCCCTGGCTCTCACTGCTGTGACTGCTGTCCTTTTCGTTGATTCCCCTCCTCTAGGCACAAACCATGATCACATTGATCACATTGCCCCCCGTTTATCGACACACTTTATTGCCAAGAAAATTCAAATTTAGTTTCTTTCAAACATGGGAATTTCACATGACTTTTACAAATAACCTGTTTAACCTTTTTGAGTCGTACAAAATTTCTCC…	GGTGTTGTTTCTAAAAGCGGCACACATTTGGTACGGAGTACATAGCCTTTTCTTTCTTTTTTTTTCATCTTTTTCTCCGGTCAAAATTGCGGTTACTACGACTAGTAACTTTTTAGTGGAGTAATAACTCCCCATCTTTATTCGCCAAAAAATACTTTTGTCTTATATCAGCCGGTGGCCGCTCCCTCTTCCCTGGCTCTCACTGCTGTGACTGCTGTCCTTTTCGTTGATTCCCCTCCTCTAGGCACAAACCATGATCACATTGATCACATTGCCCCCCGTTTATCGACACACTTTATTGCCAAGAAAATTCAAATTTAGTTTCTTTCAAACATGGGAATTTCACATTACTTTTACAAATAACCTGTTTAACCTTTTTGAGTCGTACAAAATTTCTCC…
299	Chr01	9680989	9249642	C	CCGTCTAATTCACAATGCACGAAACTATTTAAAACC	35	GGCGTTCAGGCAGAAGATGACGATGCCGGAGGACGTGGTGGAGCAGAAGCGCGCCGAGGCTGCCGCCGGCGGGAACAAGGGAACAGCCGCCGCGACGGCGACGGCGACGAACACCGGCGGGGAGGCGGCGGCGGAGGAGGTGATGATGCGGGTGAAGGCGGCGGACCAGATGACGGGGCAGGCGTTCAACGACGTGGGCAAGATGGGGGAGGAGGGCACCGGCATGGCGGCCGGAGATGGTGGGCGCCGCCGCTGAGATCGCCGGAGCCGACCGCGCGGCGCCACGCCACGGTGTTTTTGCTCGTCGCGTTTTGTACTAATCTCAGTATAATCTGTAATGTAAATATGTAATGCGGCAGTTAAAAGTAATAAAATATCCCCTAATCACTTGTCCAAAGC…	GGCGTTCAGGCAGAAGATGACGATGCCGGAGGACGTGGTGGAGCAGAAGCGCGCCGAGGCTGCCGCCGGCGGGAACAAGGGAACAGCCGCCGCGACGGCGACGGCGACGAACACCGGCGGGGAGGCGGCGGCGGAGGAGGTGATGATGCGGGTGAAGGCGGCGGACCAGATGACGGGGCAGGCGTTCAACGACGTGGGCAAGATGGGGGAGGAGGGCACCGGCATGGCGGCCGGAGATGGTGGGCGCCGCCGCTGAGATCGCCGGAGCCGACCGCGCGGCGCCACGCCACGGTGTTTTTGCTCGTCGCGTTTTGTACTAATCTCAGTATAATCTGTAATGTAAATATGTAATGCGGCAGTTAAAAGTAATAAAATATCCCCTAATCACTTGTCCAAAGC…
300	Chr01	9716239	9294159	T	TATCTTTCGTTCGTTAGTGTTCCAAACTTAACTTTTCGTT	39	GCTAGATCGACACAGTACATATATCATGTTCAGATTGAGATGATCGATCGAAGAGACGGCGACGATATATATGTATCCAATCTAGAATTAATTAGTACTCCCTTCCGCTTCAGATTATAAAACATTTTAACTTTAGTAAAAGTTAAACTATTATAAATTTAACTAATTTTATAAAAGAAAGTAGTGCTGCTATTGTAAATATTACTATTTTTTTCTATAAAATTAGTTAAACTTAGAGTAGTTTGACTTTAACAAAATTTAAAACATCTTATAACCTGAAACGGAGGAAGTGGTAAGTTGCAACCGGATTAATTATTCTGCAACACACTTTTAAAGATACGATTTTTATTTAAAAAGAACTTTCTTCTGTTATATACATGCATCATGCATCACTTAAAC…	CTAGATCAACACAGTACATATATCATGTTCAGATTGAGATGATCGATCGAAGAGACGGCGACGATATATATGTATCCAATCTAGAATTAATTAGTACTCCCTTCCGCTTCAGATTATAAAATATTTTGACTTTAATAAAAGTTAAACTATTATAAATTTAACTAATTTTATAAAAGAAAGTAGTGCTGCTATTGTAAATATTACTATTTTTTTTCTATAAAATTAGTTAAACTTAGAGTAGTTTGACTTTAACAAAATTTAAAACATCTAATAACCTGAAAGGGAGGGAGTGGTAAGTTGCAACCGGATTAATTATTCTGCAACACACTTTTAAAGATACGATTTTTATTTAAAAAGAACTTTCTTCTGTTATATACATGCATCATGCATCACTTAAAC…
301	Chr01	9721769	9299780	GCTAATATGAATGTGGAAAATACTAGAATGACTTACAT	G	37	TGTACTAGCTAGCTAGTGGGTTTTGGTGATGCACAGAGCCAGAGGTGCATGGGGTCATATATGTGTGAGATTGTGAAGTGAGGATGAGAGGAAGCTTCCAGGTTTGTTGGACCATATCAATGATGGATCACACATACTCCCTCTGTTGCTCAGAAACTCTAACACTAACTTCTCGAGGTTGAGATATATAAGGAGAAAGATAAATGATCAAAATACTCCTATTGAATGGAACATTTACTAGTACCTGTTCAGATTTAGAGTACTAGGAAATATCTTATCCAATACTATGTTCTTATATTTTGGACGAAGGTAGCAATAAAGTTATAATCAATGATGTGTACGTGAGGGTTATATAAGAGATAGAATTTTTTTTTAATTTACAGACCAATAGCAGATAAT…	AGCTAGCTAGTGGGTTTTGGTGATGCACAGAGCCACAGGTGCATGGGGTCATATATGTGTGAGATTGTGAAGTGAGGATGAGAGGAAGCTTCCAGGTTTGTTGGACCATATCAATGATGGATCACACATACTCCCTCTGTTGCTCAGAAACTCTAACACTAACTTCTCGAGGTTGAGATATATAAGGAGAAAGATAAATGATCAAAATACTCCTATTGAATGGAACATTTACTAGTACCTGTTCAGATTTCAGATTTAGAGTACTAGGAAATATCTTATCCAATACTATGTTCTTATATTTTGGACGAAGGTAGCAATAAAGTTATATTCAGTGATGTGTACGTGAGGGTTATATAAGAGATAGAATTTTTTTTAATTTACAGACCAATGGCAGATAAT…
302	Chr01	9733453	9311327	GGTGGCTGGCTGGCGGCGGCGGCGCTTGGCGGTG	G	33	TCGTTAAGCTCGCGAGCCAAACCATACAAAAACTGCCTCTAGCCCTCAGCAACAGCCAACAGCAAGCATGCATAATGATAGTACGATAAATTGTTACATGAAAATATCAAAGGAGGAGGCCGAGCACGAGGAGCAGCTTCGACGCCGACGAGAGGGAGCCGAAGGTCGACGTCGTGGCGACGCCGTGGGAGCGGCATGGGGAGAGGAAGGCGCTGCAGAGGCCTGGGTTACCGGCGAATGACGTGGCGTTGAAGTAGGCGAACTGGCCGGTCGCTGGGACCTCGCCGGAGAGATTGTTGTCGGAGAAATCGACGGCCGTTAGGCTCTGCATTCCGGCGCGTTGTGGGACAGATTGAGATAGTTGAGGATTCGTAGCCCGGCGGCACCGATGGCCATGGG…	CTCGTTAAGCTCGCGAGCCAAACCATACAAAACTGCCTCAAGCCCTCAGCAACAGCCAACAGCAAGCATGCATAATGATAGTACGATAAATTGTTACATGAAAATATCAAAGGAGGAGGCCGAGCACGAGGAGTAGCTTCGACGCCGACGAGAGGGAGCCGAAGGTCGACGTCGTGGCGACGCCGTGGGAGCGGCATGGGGAGAGGAAGGCGCTGCAGAGGCCTGGGTTACCGGCGAATGACGTGGCGTTGAAGTAGGCGAACTGGCCGGTCGCTGGGACCTCGCCGGAGAGATTGTTGTCGGAGAAATCGACGGCCGTTAGGCTCTGCATTCCGGCGCGTTGTGGGACAGATTGAGATAGTTGAGGATTCGTAGCCCGACGGCACCGATGGCCATGGG…
304	Chr01	9782229	9361460	ACCGTGTGCACGCCGCTCACGGTTGCCGAGCCCGCCGCT	A	38	CTCGAATATATGTTGTGGGGGTCTCCCAAGCATCTCTTGACCACACAATGCCATCTTGGGACTAAAACACCTAAGTATTACTCAATAAAACTCATTAGTCCCTTAACCCTATTATTATTAATCACCAAAACCCGCTAGGGGGATAAATGCAACTTCATGGGGCAGCTGCCAGATCCGGGCTAGGGGCGGTCGCCCGCCGCCGCGCGCACATCAAGCAGCGAGCACATCCCCTCCTCGTCAAGGGGGCAGCAAGCAGACAGATCAAGCAGCAACACATCCAAATCCAAACAAGCAAGAAAGATCGAGCAGCAAGAAACACGAGCACTCAACTCATCAAGAAAGTGCGCCATCGCATTGATCCGGTCTTCCCCTTGCGCACCGTCACCAATGGATGCTTAA…	CTGCTCGAATATATGTTGTGGGGGTCTCCCAAGCATCTCTTGACCACACAATGCCATCTTGGGACTAAAACACCTGAGTATTACTCAATAAAACTCATTAGTCCCTTAACCCTATTATTATTAATCACCAAAACCCTCTAGGGGGATAAATGCAACTTTAGGGGGCAGCTGCCAGATCCGGGCTAGGGGCGGTCGCCCGCCGCCGCGCGCACATCAAGCAGCGAGCACATCCCCTCCTTGTCAAGGGGGCAGCAAGCAGACAGATCAAGCAGCAACACATCCAAATCCAAACAAGCAAGAAAGATCGAGCAGCAAGAAACACGAGCACTCAACTCATCAAGAAAGTGCGCCATCGCATCGATCCGGTTTTCCCCTTGTGCACCGTCACCAATGGATGCT…
305	Chr01	9786857	9365826	TACAGAATAGTTTTTCTATATATATATATATATAT	T	34	TTTTAATTTATGCTTAACGAACAGGAAAAGCAGCGATTTAAATCAATAACCGTCGTAGTCATTGTTTGTTTTTTTAAACACTTTTACAAAAAAAGAAAATAAAAAAATTAAACACCTAATAATCAGTGTACTTACATAAATAAAATTATTTTAAAATGTATAACATAAAGAGTAAAGTTGGCATCTCTAAATTATATCATATAGTAAAGTTGGCATCTTCAAATTCAGAAGTTTCCTAAAAATATAATTATATCCTTGTTATATATTTTTTTACCATGGCCAAAAGAATACTCATGATAGAAATGGACACCTTTATAATATTATTATATCCTCTGTACATGTATGTTTTTACCATATATCCTCGTGAACATATATGTTTGATATGTATGTTTTACCATG…	TTTTAATTTATGCTTAACGAACAGGAAAAGCAGCGATTTAAATCAATAACCGTCGTAGTCATTGTTTGTTTTTTTAAACACTTTTACAAAAAAAGAAAATAAAAAAATTAAACACCTAATAATCAGTGTACTTACATAAATAAAATTATTTTAAAATGTATAACATAAAGAGTAAAGTTGGCATCTCTAAATTATATCATATAGTAAAGTTGGCATCTTCAAATTCAGAAGTTTCCTAAAAATATAATTATATCCTTGTTATATATGTTTTTACCATGGCCAAAAGAATACTCATGATAGAAATGGACACCTTTATAATATTATTATATCCTCTGTACATGTATGTTTTTACCATATATCCTTGTGAACATATATGTTTGATATGTATGTTTTACCATG…
307	Chr01	9858629	9442546	TGGCTCGTGCATCATCCTCATCCTCCTCTCCGGCAGCATTGA	T	41	GATGTCGAGTAGCCATTGGCCAGATTTGGTGGCCTACTGTAGAGTTCTGTTTTTCTTCCAGAAAGTCGCTTAGACCAGAGGGGCCAACTTCCTTAAGCCTTCTCCCTTGCAACCAAGCAAAGTCCCAGAATTTCGCTTTTGTACCATCTCCAACTGTCGTCGTCGTTCCCACAAAGAGGAGTTTGCCAATGTTGTCGCAAGGCGTCTCCGACCCCACTCAAAGCTTTCTTAGATAAACAATGTAGCAATCAGTGGCGCTTGGCGAGCCCATGGTTCAATTTTTCGTTTTCAGTATTTGTATTGGGGTGCTGATATACCGAAATTTGGTCCAGAATTATTTGAATTTTCGAACAAAATTTGGTCAAATTTGAATAAATATTACTAAATTCACACAAAAGA…	GATGTCAAGTAGCCATTGGCCAGATTTGGTGGCCTACTGTAGAGTTCTGTTTTTCTTCCAGAAAGTCGCTTAGACCAGAGGGGCCAACTTCCTTAAGCCTTCTCCCTTGCAACCAAGCAGAGTCCCAGAATTTCGCTTTTGTACCATCTCCAACTGTCGTTGTCGTTCCCACAAAGAGGAGTTTGCCAATGTTGTCGCAAGGCGTCTCCGACCCCACTCAAAGCTTTCTTAGATAAACAATGTAGCAATCAGTGGCGCTTGGCGAGCCCATGGTTCAATTTTTCGTTTTCAGTATTTGTATTGGGGTGCTGATATACCGAAATTTGGTCCAGAATTATTTGAATTTTCGAACAAAATTTGGTCAAATTTGAATAAATATTACTAAATTCACACAAAAGA…
308	Chr01	9886268	9474924	GCTATGTAGCTTGTGCATGGACCCTACTTGAGACCAC	G	36	ATTAAATATATTTTGATAGTATATTTATTTTGTATTAAAAATATTAGTATATTTTTCTACAAACTTGGTCAAACTTCAAAACTTTGTCTAAGAAAAAAAATCATGATTTTAGATCTAAACAATATCTTCCCTTCTCGGGCCATGATATCTGTCCTATAAAATCTATGTTTGCCGATGACAATGTTTAGAATCAAAAGTAGAATTTCTTCTTAAGGCTATACACAGTGGGCTTTTTTCCTAACATCCCCGCGGTGCTAGGGTGGACTTCCACCCCTATGTTCGCACTCAGTGAGGAGTCGTGTATCTCTATGGAGCCTACACGTTTCATGGCTCACCCGGGGCAGATCATTAGGTGGGATTCGCTTTGAATCCTATGTATGGACCCTATCTAAGACCACA…	TTAAATATATTTTGATAGCATATTTATTTTGTATTAAAAATATTAGTATATTTTTCTACAAACTTGGTAAAACTTCAAAACTTTGTCTAAGAAAAAAAAATCATGATTTTAGATCTAAACAATATCTTCCCTTCTCGGGCCATGATATCTGTCCTATAAAATCTATGTTTGCCGATGACAATGTTTAGAATCAAAAGTAGATTTTCTTGTTAAGGCTATACACAGTGGGCTTTTTTCCTAACATCCCCGCGGTGCTAGGGTGGACTTCCACCCCTATGTTCGCACTCAGTGAGGAATCGTGTATCTCTATGGAGCCTACACGTTTCATGGCTCACCCGGGGCAGATCATTAGGTGGGATTCGCTTTGAATCCTATGTACGGACCCTATCTAAGACCACA…
309	Chr01	9899620	9488010	TTCGTAGTAATAGAATGTGTCATACTTGGTTTTAGGTTATAGG	T	42	AAATTAGGGGGTGTTTAGATTCAGGGGTGTAAAGTTTTGGCGTATCACATCGGATATTATATAAGGTGTCGCATAGAGTGTTCGGGCACTAATAAAAAACTAATTACAGAATCCGTCAGTAAACCGCGTGACGAAGCCTAATTAATTCGTCATTAGCACATGTTTATTGTAGCACCACATTTTCAAATTATGGAGCAATTAGGTTGAAAAGATTCGTCTCGTAACTTAGTCGTAATATGTGCAAATAGTTATTTTTTTAAACTATATTTAATACTTCATGTAATTATTCAAACGTTCGATGTGACATGGTGTACTATGCTTTCAGATGTATTGTTAGAAATATCAGAATATGTTTTTTTTAAGGGAGGGAATAGACCTCAAGTAGTCAAGTTATCTGGT…	TAAATTAGGGGGTGTTTAAATTCAGGGGTGTAAAGTTTTGGCGTATCACATCGGATATTATATAAGGTGTCGCATAGAGTGTTCGGGCACTAATAAAAAAACTAATTACAGAATCCGTCAGTAAACCGCGTGACGAAGCCTAATTAATTCGTCATTAGCACATGTTTATTGTAGCACCACATTTTCAAATTATGGAGCAATTAGGTTCAAAAGATTCGTCTCGTAACTTAGTCGCAATATGTGCAAATAGTTATTTTTTTAAACTATATTTAATACTTCATGTAATTATTCAAACGTTCGATGTGACAGGGTGTATTATGCTTTCAGATGTATTGTTAGAAATATCAGAATATGTTTTTTTTAAGGGAGGGAATAGACCTCAAGTAGAAGTTATCTGGT…
310	Chr01	9921827	9509953	CCAGGACCTCAGGTGCTACTGAGGCTCTTGTAACC	C	34	GGTGCAGGGGTTGACGAGGGTCGGGTCCCAGCTCTGGAGCACGCCCCGGGGGTCCGCCAGCGCGCGCCGCAGCGCGTACAGCGCGTCCCCCTCCGAGTTGGACGCCGACGCCACGGCCGCCGCCAGCAAAACCGCCGCGAGCGCCGGGGACCAGGCCGCCGCCATCGCCATCGAAGCTTAGCTAGGGTTCCGGATGCGGGCGAGGAGGAGTGGGGAAATGGGCGGAGTGAGTGAAGGTAGTGGAAGCGGAGGTGGTGAGGGGAGTTTAACCTCGGGAGTCGGGGGAGGGATCGCTCGGATCTTCTGCGGCGTAAATACGCGCGAGTGAGCTTGTTGTGTGACGGTGTGAGGGTGAGATGGGACACGCAACGCCTCGCTGTCGAGGGGTACGTCGCCTAT…	GGTGGACTCACAGGCGGGTGACGCGGCCGGCGCGGTCGCAGGTGACGTGGAACCAGGTGCAGGGGTTGACGAGGGTCGGGTCCCAGCTCTGGAGCACGCCCCGGGGGTCCGCCAGCGCGCGCCGCAGCGCGTACAGCGCGTCCCCCTCCGAGTTGGACGCCGACGCCACGGCCGCCGCCAGCAAAACCGCCGCGAGCGCCGGGGACCAGGCCGCCGCCATCGCCATCGAAGCTTAGCTAGGGTTCCGGATGCGGGCGAGGAGGAGTGGGGAAATGGGCGGAGTGAGTGAAGGTAGTGGAAGCGGAGGTGGTGAGGGGAGTTTAACCTCGGGAGTCGGGGGAGGGATCGCTCGGATCTTCTGCGGCGTAAATACGCGCGAGTGAGCTTGTTGTGTGACGG…
311	Chr01	9926478	9514571	AAGCTACAAGTAACCGCATCAATCATTTGAAGA	A	32	ATCCAAGTTATTCACTTTTATTTAATTGGGATCTTTACATTTGAGCATATATTTGAGTATATGACACTTATGGTGTTGATTAATACTCATCATTTATTCATATCCTTTTATACATGCGATCGGTTAGTCAACATGTGGAGGTTGACAACCGGATCATTGAGACTAATAATTTCACTAAGTTGAATGAGAAAAATAGGTTCCAAGTATTGAAAAGGTGTTGACGCTCAAGTGATATGATTACACCTAAAATACAAAGAATAACAAAGCAAAGATATTGAAGATGATTACACCTAAAATACAAAGAATAACAAAGCGAAGATATTGAAGATGTGGGATACGAAGTGGCTACTATGGCAAGACGGTGAAGGGCAAACGATGCTCGGTCGCGATGGACCATGC…	ATCCAAGTTATTCACTTTTATTTAATTGGGATCTTTACATTTGAGCATATATTTGAGTATATGACACTTATGGTGTTGATTAATACTCATCATTTATTCATATCCTTTTATACATGCGATCGGTTAGTCAACATGTGGAGGTTGACAACCGGATCATTGAGACTAATAATTTCACTAAGTTGAATGAGAAAAATAGGTTCCAAGGATTGAAAAGGTGTTGACGCTCAAGTGATATGATTACACCTAAAATACAAAGAATAACAAAGCAAAGATATTGAAGATGATTACACCTAAAATACAAAGAATAACAAAGCGAAGATATTGAAGATGTGGGATACGAAGTGGCTACTATGGCAAGACGGTGAAGGGCAAACGATGCTCGGTCGCGATGGACCATGC…
313	Chr01	9952213	9540067	TTAGGTGGGCGCTGGAAGCGCCCGTCTAATGCGGC	T	34	GAAATTCAAATTCAAATTATTGAAATAGAGTCATATAGCAAAATGACCAAAATAAAAGTTGTAGATATCGATGATTTATGCAACTTTAATATTACCTTAATTAATCAACTGTTTTATTGTTTTGCTCAATAAAATGCTTTGCAACGCGCCTTCATGCAAATAGCCACAAGCCCTCCGTTGTATCCCCTTGCACGTCTGCATCACTGGTGTGGCTTGCTGAGTACAGTTATTGTACTCAGCCTTGCTATTATTCTCCTTTTTTAGAAGTGTAGCGCTTCTGAGCTGAAGACGATGTTAGAGGACCAAGGCTCAGACCCCAGTTGAGTTTTGCCTGTGGAGTGGAGCTGAAGCCCCCGATAGGATTGCCTGACATGGAGCCAGTGCACAGGCGCACTACCC…	GAAATTCAAATTCAAATTATTGAAATAGAGTCATATAGCAAAATGACCAAAATAAAAGTTGTAGATATCGATGATTTATGCAACTTTAATATTACCTTAATTAATCAACTGTTTTATTGTTTCGCTCAATAAAATGCTTTGCAACGCGCCTTCATGCAAATAGACACAAGCCCTCCGCTGTATCCCATTGCACGTCTGCATCATTGGTGTGGCTTGCTGAGTACAGTTATTGTACTCAGTCTTGCTATTATTCCCCTTTTTCAGAAGTGTAGCGCTTCTGAGCTGAAGACGATGTTAGAGGACCAAGGCTCAGACCCCAGTTGAGTTTTGCCTGTGGAGTGGAGCTGAAGCTCCCGATAGGATTGCCTGACATGGAGCCAGTGCACAGGCGCACTACCC…
314	Chr01	9975104	9565880	T	TTTAGAGACATACAGTCGGAAGAAGTCTGGTTGGCACCA	38	ACACAGTCTTAATCTTGTTAATCTACGTATAAATAATGTGTGGCAAATCGATGAGAACTGAATGTAACATTCACACACAGATTGACAGATATAGACAAGTCCAACCGAGATTCTTATGAATTACTCAGAGAGATAATGAACTATTTTATATATTTAACCAACAACAAACTTTGCTCAGTTGGTTTTGGAGGGCGGCCTTTCAGCTTTTTCACTGGTTCTATATTAAACCGCTAGATCAACTGGCTAGTTTTTACTGTTCATATGTTTAGACGGTCTTTTGACAAAACTAGACCGAACCAAGAGTTGGTTCTAGTTTTTTCAGTTAAACCACTGGTCCAGACGGAGGTCCACGATAGTTAATAGATTCGAGGAAAAGCAAAGACAAATCCTAGATTGAAC…	ACACAGTCTTAATCTTGTTAATCTACGTATAAATAATGTGTGGCAAATCGATGAGAACTGAATGTAACATTCACACACAGATTGACAGATATAGACAAGTCCAACCGAGATTCTTATGAATTACTCAGAGAGATAATGAACTATTTTATATATTTAACCAACAACAAACTTTGCTCAGTTGGTTTTGGAGGACGGCCTTTCAGCTTTTTCACTGGTTCTATATTAAACCGCTAGATCAACTGGCTAGTTTTTACTGTTCATATGTTTGGACGGTCTTTTGACAAAACTAGACCGAACCAAGAGTTGGTTCTAGTTTTTTCAGTTAAACCACTGGTCCAGACGGAGGTCCACGATAGTTAATAGATTCGAGGAAAAGCAAAGACAAATCCTAGATTGAAC…
316	Chr01	10011543	9589299	G	GCGTGTAGGCGGCGCCCAGCAACTGCTGACAG	31	TTTTCACTAATAATTTGTGCCTTTCGGTTCTCATCCTGCTAAGCATGAAAGAACTTACTGTACATGCCATAACAACAACAAACCAAGAACTGAAGAACACAAACCTGCATGCAGAAACCAAAAAGAATGGCCTTTCTTGAGAAGAACAAACAACCGATCATATTAAAGAAGAAGAACAGAGGAGTAAGCTGAAGCAGATCACTCAATTGCACACAATTAACTCCCGTCAAGGACATCACCGATCCTCTCAATATTTTTTTTCTTTCATTTCTCATCCAGCTAACCATGAAAGAACTTACTGTATATGCCCATAACAACAACAACAAACCAAGAACTGAAGAACACAAACCTGCATGTAGAAACCAAAAGAGAATGGCCCCTTTCTTGCGAAGAACAGAA…	CTTTTCATTAATAATTTGTGCCTTTCGGTTCTCATCCTGCTAAGCATGAAAGAACTTACTGTACATGCCATAACAACAACAAACCAAGAACTGAAGAACACAAACCTGCATGCAGAAACCAAAAAGAATGGCCTTTCTTGAGAAGAACAAACAACCGATCATATTAAAGAAGAAGAACAGAGGAGTAAGCTGAAGCAGATCACTCAATTGCACACAATTAACTCCCGTCAAGGACATCACCGATCCTCTCAATATTTTTTTCTTTCATTTCTCATCCAGCTAACCATGAAAGAACTTACTGTATATGCCCATAACAACAACAACAAACCAAGAACTGAAGAACACAAACCTGCATGCAGAAACCAAAAGAGAATGGCCCCTTTCTTGCGAAGAACAGAA…
317	Chr01	10058506	9634327	C	CCCACATTAATTCGGTCACCGGGACTTCGTTCGGACTCCGATTACTAG	47	ATTCATTTGCACTTAATAAAGGCCAGCTTCTGCCAGAGTGGAGCGGAGGCCCGTCGCCGGGAGGCTTGAGGCTTCCGCCACCAAGCTCCTTTGCGTGGCCCAAGTACTGGCGAGGTTTGAGCTCGTCCCCTCCACCGTCGAGATCCTCCCCATGGTCGTTGGCGAGCCCGAGTTCATCTCCTTCGTCGTTGAGCTCCTCCTCGGGCTCGCAGTGCCGACGAGGTCAAGCTCATCCCCTCCGTCGTCGAGCTCCCTTCTCTCTTTCCCCTTGGCTCGCGAGCCAAACGAGCTAGCTCGAGCTTTCAAACGAGTCGAGCCGATCTAGGCTTCTAGCTCGTTAGGATAATGAGCCGAGCCGAGCCAGCTTGTTATCTTAACGAGCTCGACCGAGCCGAGCCG…	ATTCATTTGCACTTAATAAAGGCCAGCTTCTGCCAGAGTGGAGCGGAGGCCCGTCGCCGGGAGGCTTGAGGCTTCCGCCACCAAGCTCCTTTGCGTGGCCCAAGTACTGGCGAGGTTTGAGCTCGTCCCCTCCACCGTCGAGATCCTCCCCATGGTTGTTGGCAAGCCCGAGTTCATCTCCTTCGTCGTTGAGCTCCTCCTCGGGCTCGCAGTGCCGACGAGGTCAAGCTCATCCCCTCCGTCGTCGAGCTCCCTTCTCTCTTTCCCCATGGCTCGCGAGCCAAACGAGCTAGCTCGAGCTTTCAAACGAGTCGAGCCGATCTAGGCTTCTAGCTCGTTAGGATAATGAGCCGAGCCGAGCCAGCTTGTTATCTTAACGAGCTCGACCGAGCCGAGCCG…
318	Chr01	10095660	9660936	CTCCTTCGGGTCAGTTTCGCCTGAATAGCACGGGACGGGTGGGAAC	C	45	CGTGAGCTTGAGCAGCGGCGACGGAGGCTTTGTCGTACTCAGCTTGTATAGCTTGTCGTCGCTTGGAATCCTCCTCGCCCCTTGCGAACCCGTCAATGATGCGAAGTAGCTGCTTGAGCGTTTGTGGCTCCTTGTTGGCGATTTTTCTTGTGAGTTCGCCCTCGAGCAGACCGGCCGAAGCGGCGTTTATAACCGACGCCTCGGTTATGTCTTGAACTTGGCACCGGGCTTGCGAGAAGCGACGCATGTACTCCCTTATCGACTCCCCCGGCCTTTGCCGAATACCGAGAAGGTGTTGCTGCGTCTTCGGCTCCTCATAGGTGCCTCGAAAGTTAAGGACAAAAACATCGCGCAATTGCTCCCATGAGTAAATGCTATTGGCTGGTAAATTGAAATACC…	CTTGAGCTTGAGCAGCGGCGACGGAGGCTTTGTCGTACTCAGCTTGTATAGCTTGTCGTCGCTTGGAATCCTCCTCGCCCCTTGCGAACCCGTCAATGATGCGAAGTAGGTGCTTGAGCATTTGTGGCTCCTTGTTGGCGATTTTTCTTGTGAGTTCGCCCTCGAGCAGACCGGCCGAAGCGGCGTTTATAACCGACGCCTCGGTTATGTCTTGAACTTGGCACCGGACTTGCGAGAAGCGACGCATGTACTCCCTTATCGACTCCCCCGGCCTTTGCCGACTACCGAGGAGGTGTTGCTGCGTCTTCGGCTCCTCATAGGTGCCTCGAAAGTTAAGGACAAAAACATCGCGCAATTGCTCCCATGAGTAAATGCTATTGGCTGGTAAATTGAAATACC…
319	Chr01	10098786	9664002	A	ACTTATAATAGAGATGATAGATGGAAAGGCTGTTGG	35	GCGAGGCGAGGAGGAGCACTACTACGGGAGGCTTAGACGGCGCCCACCCCGCCGCTCGCTGGCACCCGCCCCGCTGCTCGCCGCCGCCCGCCGTTCGCCACAGCCCGCCTTCCCCGCTCGTCGCAACCGCAGCCTTCGCTCGCCGCAGCCGTCGCAAGCCGTTGCCCCGCCTCCACCAGCCCCGCCGTGGCCTTTGCTCGCCGCAGCCGCTGGCCTTCACTCGCCGCAGTCGTCGCCCCGCCTCAGCCCGCCCCGCCTCTCGCTGAGCCGCCACCCGCCGCCTCGCCTCCGCCTCCGCCCGTCGGCACGCAAGTTGTCGTCGCCGTCGCCGTCCGCCGTCGCCGCACCGAGGTAGGCGCCGTCCGCCGTCACCGCACGAGGTAGGGGTGCCAGTGGGGG…	ACGAGGCGAGGAGGAGCACTACTACGGGAGGCTTAGACGGCGCCCGCCCCGCCGCTCGCCGACACCCGCCCTGCTGCTCGTCGCCGCCCGCCGTTCGCCGCAGCCCGCCTTCCCCGCTCGTCGCAACCGCAACCTTCGCTCGCCGCAGCCGTCGCAAGCCGTCGCCCCGCCTCCACCAGCCCCGCCGTGGCCTTTGCTCGCCGCAGCCGCTAGCCTTCACTCGCCGCAGTCGTCGCCCCGCCTCAGCCCGCCCCGCCGCTCGCTGAGCCGCCGCCCGCCGCCTCGCCTCCACCTCCGCCCATCGGCACGCAAGTTGTCGTCGCCGTCACCGTCCGCCGTCGCCGCACCGAGGTAGGCGCCGTCCGCCGTCACCGCACGAGGTAGGGGTGCCGGTGGGGG…
320	Chr01	10106531	9671835	GTATATATCAATATCAATATCAATATATATA	G	30	TGGTAACACAGGACGTGGTGGCATGGAGCTGACTAATCTAGCCAAACATTTTCACACCTACCTCTAGCTCCTATAGGAGCTAGCTCCCATTGGAGTTGGAGTTTAGAGTTAGTAGTTAGAGTTTGGAGCCCTACCAAACGGGGCCTTTGTGTTCATGGGTATGCCTAACTTGGCCGAGCTAGTATTAGGCTCATAGGTAACATATGGGTACCCGAATATAAATGTACATACGTGATTTTCTGGATGATTGTGTGTCAAAGATCAACTAAAACTTGAATGTGCAAATACACAAAGTGATACATATTAATGGCTTGGTCATTTGTTTTCTTATTCCGTGATGAAATAATCTGTACATTGGTTAGTTGTAGAATTATGGATGTTGGTATGCACTCACTACTT…	TGGTGACACAGGACGTGGTGGCATGGAGCTGACTAATCTAGCCAAACACTTTCACACCTACCTCTAGCTCCTATAGGAGCTAGCTCCCATTGGAGTTAGAGTTTAGAGTTAGTTGTTAGAGTTTGGAGCCCTACCAAACGGGGCCTTTGTGTTCATGGGTATGCCTAACTTGGCCGAGCTAGTATTAGGCTCATAGGTAACATATGGGTACCCGAATATAAATGTACATACGTGATTTTCTGGATGATTGTGTGTCAAAGATCAACTAAAACTTGAATGTGCAAATACACAAAGTGATACGTATTAATGGCTTGGTCATTTGTTTTCTTATTCCGTGATGAAATAATCTGTACATTGGTTAGTTGTAGAATTATGGATGTTGGTATGCACTCACTACTT…
321	Chr01	10134782	9700095	CATCACTACCTCTGCCGCAGCCAGACCCAAACGCGCC	C	36	TCAGGCACGAGCTAGCCGGCCATGGCGAGGCGTCGCCATGCTTGCTTTCTTCTCCTGCTGCCTCTGCTGGTGCTGCAGCTTCTTCTTGCTGGGGGAAGCTTGGTTGATGATCTTCCTGCTGCAACTCATCAGGTGCCGAGGTTAGTAGGGCCACAGCGCAAGTTACAGCAGCTTCCAAACCCAAGGCCACAGCCGCAACCATTGCCCCAGCCAAACCCAAATCCACAGCCACAACCACTCCCACAGCCACAGCCACAGCCACAACCACAACCACAACCTCTGCCACAACCGCAGCCGCAACCACAGCCTTTACCGCTACCAGGCCCACAACCATTACCGCAACCCGGCCCGCAGCCGAACCCAAACCCCCAACCGTTACCACAGCCAAACCCAAATCCC…	TGGTGATCAGGCACGAGCTAGCCGGCCATGGCGAGGCGTCGCCATGCTTGCTTTCTTCTCCTGCTGCCTCTGCTGGTGCTGCAGCTTCTTCTTGCTGGGGGAAGCTTGGTTGATGATCTTCCTGCTGCAACTCATCAGGTGCCGAGGTTAGTAGGGCCACAGCGCAAGTTACAGCAGCTTCCAAACCCAAGGCCACAGCCGCAACCATTGCCCCAGCCAAACCCAAATCCACAGCCACAACCACTCCCACAGCCACAGCCACAGCCACAACCACAACCTCTGCCACAACCGCAGCCGCAACCACAGCCTTTACCGCTACCAGGCCCACAACCATTACCGCAACCCGGCCCGCAGCCGAACCCAAACCCCCAGCCGTTACCACAGCCAAACCCAAATCCC…
322	Chr01	10187106	9772563	TACATACATACATACATACATACATACATACATACATAC	T	38	GATGTACGTATACATAAATCATTCAAAATTTCATTGCGTATCGATTTGTTAAGTTGTTTATTAATTTCATATATTGATACGTCATTATTTTTCGAACGATAGCGTATTCACATGAGGGATAATCTCCCACACAAGGATTTTATCACTGCTGTTCAAGAACAACTGATGGGATTCATCAACGAAAAAGTCCTTAATCCCGACGGTGAATTCTACTACGACGGATCGACAATTCATAACGTCAGTCCTTCCTCTTCTGACATAACGCCGGCGTCGAAGTCGTAGCTATAGCTACCGAGCAAATGAATTGTACTATATATACATATACATGTATATATATATATTTATATATGTACACATTTACTTTTGTGTTAATATATGTTTTGGTAACATATATATATG…	GAGAGCTCGATGTACGTATACATAAATCATTCAAAATTTCATTGCGTATCGATTTGTTAAATTGTTTATTAATTTCATATATTGATACGTCATTATTTTTCGAACGATAGCGTATTCACATGAGGGATAATCTCCCACACAAGGATTTTATCACGGCTGTTCAAGAACAACTGATGGGATTCATCAACGAAGAAGTCCTTAATCCCGACGGTGAATTCTACTACGATGGATCGACAATTCATAACGTCGGTCCTTCCTCTTCTGACATAATGCCAGCGTCGAAGTCGTAGCTATAGCTACCGAGCAAATGAATTGTACTATATATGCATGTATATATATATTTATATATGTACACATTTACTTTTGTGTTAATATATATTTTGGTAACATATATATATG…
325	Chr01	10258657	4743874	AAGATCTTTAGTCTCGGTTGGTAGCACCAACCGGGACTAAAGATCAC	A	46	AAACTAATTTTAATGTGTTTTACTTCTTTTAATTTTTATTTTAGTTTGTTTTCTATTATTTAATATTAACTTTCACTAGAGTTTTCCTTCTCAACTATTTTATAAAACCTTGTTTAGCAAATGAACTAAATTTCTATATATTCTTTCTTCCCCACACACATTTTCTCTCTCATCAACTTACAACTAAAATTTGGAGACAAAAAAAGTGTGCAAAACATAGGTGCAAATGTAGTATGACAAAAAAAAACATTGGAGGATGAAGTTGCAAACCTTTTAGGCACCTCCGATTTGTATGTAATCACCAAAATAAATTCAATAGAAATTTTGGCATGACCTCCCCTCTTTTTTGAAGAAATTTTGAAGCTTGCTCGGGCAGCTGGAGGAGGAAGAAGACATATA…	TAATTTTAATGTGTTTTACTTCTTTTAATTTTCATTTTAGTTTGTTTTCTATTATTTAAGATTAACTTTCACTAGAGTTTTCCTTCTCAACTATTTTATAAAACCTTGTTTAGCAAATGAACTAAATTTCTATATATTCTTTCTTCCCCACACACATTTTCTCTCTCATCAACTTACAACTAAATTTTGGAGACAAAAAAAGTGTGCAAAACATAGGTGCAAATGTAGTATGACAAAAAAAAATATTGGAGGATGAAATTGCAAACCTTTTAGCCACCTCCGATTTGTATATAATTAATCACCAAAATAAATTCAATAGAAATTTTGGCATGACCTCCCCTCTTTTTTGAAGAAATTTTGAAGCTTGCTCGGGCAGCTGGAGGAGGAAGAAGACATATA…
327	Chr01	10284883	9872549	A	ATACCTCTTTCATAAACTATGCACGTTTAGGCTAGTTGATATATGC	45	CACGGATTAAAGGGCACACAAGTCAGACATCTGCAATGCACCACCTTAGGGGCCCACATGGCAACCTCTAGAGAAAGGCGGTGGAGAGAGGTGGAGCCCAGGGGTGACTGAACCCTGGTTTGGTTGAACCGCCATCGCTGCCTCTCATCTCCACCTTCCATGTGGACATCACTAATTACCTCCTAATGACAGTTGTGGGAGTTATCGACCTAATCAACTGTCATAAGTAGGCTATAAAAAGGAGATCACCTCTTCAGTTCACAACACACACTTAAGAAGCAACCTGTCTATTCTACATTTGTATTACTCTCTAGTTTAGTGGAGTTTAGGCTTAGAATAGTTCTTCGGTTTCCTAGACTTCTCGAAGATTTGGGTATGTCTTTAGTATTATACTCCTAT…	AGAGCACACGGATTAAAGGGCACACAAGTTAGACATCTGCAATGCACCACCTTAGGGGCCCACATGGCAACCTCTAGAGAAAGGCGGTGGAGAGAGGTGGAGCCCAGGGGTGACTGAACCCTGGTTTGGTTGAACCGCCATCGCTGCCTCTCATCTCCACCTTCCATGTGGACATCACTAATTACCTCCTAATGACAGTTGTGGGAGTTATCGACCTAATCAACTGTCATAAGTAGGCTATAAAAAGGAGATCACCTCTTCAGTTCACAACACACACTTAAGAAGCAACCTGTCTATTCTACATTTGTATTACTCTCTAGTTTAGTGGAGTTTAGGCTTAGAATAGTTCTTCGGTTTCCTAGACTTCTCGAAGATTTGGGTATGTCTTTAGTATTATAC…
328	Chr01	10288545	9876174	T	TTTTATATAGTTTAGATGTGAAGATTTCTGGTTTTGGGTTTAG	42	TACCGTTTTCACCCCTACTTGTGAGTTGTGACACCCCAAAAAAAATGGAGGAGAAAAATAAAAAGAAAAGAGGGTTGCTTGAGCTGCTTAGCTCCTTGGGCCTGAACCAGTGTGCAGCAAGTTGGGCCTTAGCCTGGTTGGTAGCAAGTGTGCGTGCGTGCAGCTGCAGTAGCAGCCTAGCAGGCCGGCCGGTGGCTAGCAGCAGCAGCGAGCGGAGCAGCAGCAGTTCTGGAGCTCGGCACGCACCAGCTAGTACCATGTAAGTTTGGAGAGAAAGAGACAGCAGTAGTGTATAAGAATGCTCGAGCAACCCAGACTAAAGGGGTTACAAATCGAAACCTCGAATCCAGAACTAAAGATGATAGCGCCACGTGAATAACGCTACCATCTTTATTACCG…	ATCCGTTTCCGTACCGTTTTCACCCCTACTTGTGAGTTGTGATACCCCAAAAAAAATGGAGGAGAAAAATAAAAAGAAAAGAGGGTTGCTTGAGCTGCTTAGCTCCTTGGGCCTGAACCAGTGTGCAGCAAGTTGGGCCTTAGCCTGGTTGGTAGCAAGTGTGTGTGCGTGCAGCTGCAGCAGCAGCCTAGCAGGCCGGCCGGTGGCTAGCAGCAGCAGCGAGCGGAGCAGCAGCAGTTCTGGAGCTCGGCACGCACCAGCTAGTACCATGTAAGTTTGGAGAGAGAGACAGCAGTAGTTTATAAGAATGCTCGAGCAACCCAGACTAAAGGGGTTACAAATCGAAACCTCGAATCCAGAACTAAAGATGATAGCGCCACGTGAATAACGCTACCATCT…
329	Chr01	10299121	9886803	TAGATATATATATATATATATATATATATATATAT	T	34	ATCGTGTGCCGCGCGGAAAAGAAAAGGAAGGAGAGGTTGACAACCGTGAGCCCGTGGCCACACCCTGTTTTCACAGGCCACGACAACGTGAGATGAAATGTGATGATGCGAATTGAATCAGCAGGCGATGAGCCGATCGATGGATGATAGAGGCGACCGACCGACCGAACTGGGAATGAAGCGAAGCGACGTAAGCGATGTCGCACTACTGTCCCAATCTGCTCCCTGCTCAACTACGCTTAGAAAACTGTCAAACTTGTAAAGGAGATCGAGCTTAGCTGCTGCTAATCGCAAGAGCAAGACAACGTTCTTTTATGTCTCGTTGCTGTCATAACCCAAGTAATCTTTAATGATCTAGTTGCAGCGCGCACACACACACACACGCAATGACGCAAATTG…	CAATCGTGTGCCGCGCGGAAAAGAAAAGGAAGGAGAGGTTGACAACCGTGAGCCCGTGGCCACACCCTGTTTTCACAGGCCACGACAACGTGAGATGAAATGTGATGATGCGAATTGAATCAGCAGGCGATGAGCCGATCGATGGATGATAGAGGCGACCGACCGACCGAACTGGGAATGAAGCAAAGCGACGTAAGCGATGTCGCACTACTGTCCCAATCTGCTCCCTGCTCAACTACGCTTAGAAAACTGTCAAACTTGTAAAGGAGATCGAGCTTAGCTGCTGCTAATCGCAAGAGCAAGACAACGTTCTTTTATGTCTCGTTGCTGTCATAACCCAAGTAATCTTTAATGATCTAGTTGCAGCGCGCACACACACACACGCAATGACGCAAATTG…
330	Chr01	10308964	9896599	A	AGAGAGAGAGAGAGAGAGAGAGAGAGAGAGAGA	32	CATTGGAGGGAGAACGTGCGGCTGTTCCGGGACAGCGTAGATGGTGACCGGAAGGCCGCTGCTACCCCACAAGTGATCGCCGGCAACCCCTTCGGGATCAAGCTGCTACGACTACTTCCGCTACGCCGACGATCACTGGAGCAGTTCGAAGGACTTCGTCCTCTACTTCCACTTTGACTGACGGCATTGCAGAGGGAACAAGGAGAAGCACATCAATGGCTTCAAACAACGGTCAGTAACCCTAAGAATTCCGCAGTAGGGTGATCATGTTTAGGATAAGCAGTCATGTTAGTATATCACAAATTCTAGAGGGTGGAGCTAGCTGGGAGCGGCGGAGGGGGAGCCAAGGGCGACATCAGAACTCCACCCGAGCGAGCTCTGCCTCCTTCGCCAGCCGCC…	AACGTGCGACTGTTCCGGGACAGCGTAGGTTGTGACCGGAAGGCCGCTGCTACCCCACAAGTGATCGCCGGCAACCCCTTCGGGATCAAGCTGATGTCCTCACTGCTACGACTACTTCCGCTACGTCGACGATCACTAGAGCAGTTCGAAGGACTTCGTCCTCTACTTCCACTTTGACTGACGGCATTGCAAAGGGAACAAGGAGAAGCACATCAATGGCTTCAAACAACGGTCAGTAACCCTAAGAATTCCGTAGTAGGGTGATCATGTTTAGGATAAGCACTTATGTTAGTAGATCACAAATTCTAGAGGGTGGAGCTAGCTGGGAGCGGCGGAGGGGGAGCCAAGGGCGACATCAGAACTCCACCCGAGCGAGCTCTGCCTCCTTCGCCAGCCGCC…
331	Chr01	10312767	9905899	A	ATACTTCAAGATTCCTACATATATACATTGAAT	32	TAGTTTGGCTTTTTCTAGCTAGTGCTCACCTCCAGCTATATATACACATCACAAGCTAGCTGCTCTCTTTCCTTGCTTGTTTTTTTCTCAACTCGATCCATCTCTCTCTCTCTCTCGATCTCTCCATTAATTTCTACGTAAGCATTCGTAGCTATGGAGGAGTGCAAGGGCGGTGGCATGTCGCCGTCCTCCTCCATGGATAGCAGCACCCACCCGGCGCTGTCCACGACGTCGTCGGCGGCGACGGCGAGGCGGGACCTCAGCACCGATCTCCGGCTAGGGCTTAGCCTCTCGACGTCGTCGTCGTCCTCCCTCCTGCAGGCCGCCGCCGCCGCCGCCGCTGCTGATGATAGCATCCCTTCTACTCCAAGGTTATTAGATTTCTTTCTTTCTTAGTTT…	GCATAGTTTGGCTTTTTCTAGCTAGTGCTCACCTCCAGCTATATATACACATCACAAGCTAGCTGCTCTCTTTCCTTGCTTGTTTTTTTCTCAACTCGATCCATCTCTCTCTCTCTCTCGATCTCTCCATTAATTTCTACGTAAGCATTCGTAGCTATGGAGGAGTGCAAGGGCGGTGGCATGTCGCCGTCCTCCTCCATGGATAGCAGCACCCACCCGGCGCTGTCCACGACGTCGTCGGCGGCGACGGCAAGGCGGGACCTCAGCACCGATCTCCGGCTAGGGCTTAGCCTCTCGACGTCGTCGTCGTCCTCCCTCCTGCAGGCCGCCGCCGCCGCCGCCGCTGCTGATGATAGCATCCCTTCTACTCCAAGGTTATTAGATTTCTTTCTTTCTTAG…
332	Chr01	10321720	9916191	C	CCTGGCGCCATACCCGCTGGCCTTCGCCCCGCCGCACTGCCTCTACTCGCCA	51	TAGTGGTATTTGTTGATGTGACATCCACGTGTCATCCTAGTCGTCAAACAAAATAAAAAATAAAATATGACTCACCAGCCACACTTCCCTTGCTCTCTCTCTCTCCTTCCTTCTATAACCCCTCTCTCTCTCCCCCCATGTTTTCTTGGCGGTAGCAGAGGGGTACACGTGCAGAGGGTGGCCGCAGGGCGACAGCACAAAGCCTTCCGCATCAAGCGGTGCCTCGATGAGGAGTTATGGCATGGAGCAGGACGATTCCAGCGGCGGAGACAAAGATGGCATGGTGGAAGGCATTGGGGGAGATGGGGAGCATGCTCCAAGCCGCCACTCCTCGTCCCGGCTCCGCATCGTCGATGGAGGGTCTCGCCGCTTGAGATCCTCCCCCTTGCGGCCGGCACC…	GTATTTGTTGATGTGACATCCACGTGTCATCCTAGTCGTCAAACAAAATAAAAAAAAAATATGACTCACCTGCCACACTTCCCTTGCTCTCTCTCTCTCTCTCTCCTTCCTTCTATAACCCCTCTCTCTCTCCCCCCATGTTTTCTTGGCGGTAGCAGAGGGGTACACATGCAAAGGGTGGCCGCAGGGCGACAACACAAAGCCTTCCGCATCAAGCGGTGCCTCGATGAGGAGTGATGGCATGGAGCAGGACGATTCCAGCGGCGGAGACAAAGATGGCATGGTGGAAGGCATTGGGGGAGATGGGGAGCATGCTCCAAGCCGCCACTCCTCGTCCCGGCTCCGCATCGTCGATGGAGGGTCTCGCCGCTTGAGATCCTCCCCCTTGCGGCCGGCACC…
333	Chr01	10331386	9937533	CAAGCGGTGCCCCGACAAGGAGCAGGACGTTTT	C	32	AGTCATTTATTTTAACCAACGTATCAAAGTATCTAGTATCTAATACTATCAATTGCGTTATGACTTGTGCGTCACTGGAATGCCCCAGTGATGATGTCATTTTTATAGCAGTGTATGCCACTATCCAGGCACGAGGCATCCACAAGCTACAAGCCTACAACACACCCAAGATTGACAGAGTGCGGGGCTGGAAAATTCATACATCTTAGTTTGGGCTACTAACGGAACCTTCTTGGCCCATATGTCTCCCTGACCGCAGTATAGATAGAGCTTAAAAACCGTATAATTTGACTCCCACGATAGTATTGATAGTGGTATTTGCTGACGTGGCATCTAGTTAACAAAGAAAATAAAAAATAAAATAGGACCCACCTGTCACACTCCCCTTGCTCTCTCTCC…	CAGCGGTTAGCTATACGATCAGTTATTTATTTTAACCAACGTATCAAAGTATCTAGTATCTAATACTATCAATTGCGTTATGACTTGTGCGTCACTGGAATGCCCCATTGATGATGTCATTTTTATAGCAGTGTATGCCACTATCTAGGCACGAGGCATCCACAAGCTACAAGCCTACAACACACCCAAGATTGACAGAGTGCGGGGCTGGAAAATTCATACATCTTAGTTTGGGCTACTAACGGATCCTTCTTGGCCCATATGTCTCCCTGACCGCAGTATAGATAGAGCTTAAAAACCGTATAATTTGACTCCCACGATAGTATTGATAGTGGTATTTGCTGACGTGGCATCTAGTTAACAAAGAAAATAAAAAAAAATAGGACCCACCTGTCACAC…
334	Chr01	10369617	9975890	AGAGAGAGAGAGAGAGAGAGAGAGAGAGAGAGAGAGA	A	36	AACTACAAAGTTTCAATTCAGATAATATAATGTCTTAGAAAAATAATAAATTAAAGGAAAAACAAAGAGTGCTGACACAGCACCATGTCCTTGTAGACTTTGTTACCTCATGAAATATTCCACGAAAAAATATGCATGCTAGAAGCTATATATATTGCATATATTATAGTACTAGTCAAGTTTCCCGCACAAATCAGTTACGTGGGGTTATTTGAATCGAAGTAGAATTTAATATGTTATTTAATTACTCTATCTACGACTCTAGTTCTATAAATAGAATTGTATTGTGGATATTCCCGCGCAATTTTACGTAGATAGAGCTATTTAAAAAGTACCGTTGAATCCGATATGCAACTCTTACATCGTTTTAAATAATATAATAGACATATTATTGAGACA…	AACTACAAAGTTTCAATTCAGATAATATAATGTCTTAGAAAAATAATAAATTAAAGGAAAAACAAAGAGTGCTGACACAGCACCATGTCCTTGTAGACTTTGTTACCTCATGAAATATTCCACGAAAAAATATGCATGCTAGAAGCTATATATATTGCATATATTATAGTACTAGTCAAGTTTCCCGCACAAATCAGTTACGTGGGGTTATTTGAATCGAAGTAGAATTTAATATGTTATTTAATTACTCTATCTACGACTCTAGTTCTATAAATAGAATTGTATTGTGGATATTCCCGCGCAATTTTACGTAGATAGAGCTATTTAAAAAGTACCGTTGAATCCGATATGCAACTCTTACATCGTTTTAAATAATATAATAGACATATTATTGAGACA…
335	Chr01	10371150	9977373	C	CCCCTCTCTCTCTCTCTCTCTCTCTCTCTCT	30	AGAGAGCCGAGCTAGCCGGGTGATCTGATAATGATTATTAATTAATTAACTAGAGCAAGCAAGCAAAGCATGATGATGGAGGTGATGATGATGTCGTTGCGAGCTGAGAGCTGATTAATCGGAAGCGGGAGGGGGGCAAGATCCGGGAGACAAGCGAGGCGCGCAGCCATGTTATGCGCCTCACAGTGGCTGCACGTGCACGCTGCCTCCATTGCCATTTGCCAGAGAGAGAGAGAGACAGAGAGAGAGAGAGAGAGAGAGAGAGAGAGATCGGTGTGTGCTAGCTAGTGGCGCGCATGTAGTATGGATGAATGATTGGGCGGGTGGACCTGCAGAGACCACGCGACTACGCATGCAATTCGTCGCCTCCGCCGTCCGCCGCGCGCGCCCGCCGGTGCG…	GGAATTGAAGAAGAAGAGAGCCGAGCTAGCCGGGTGATATGATAATGATTATTAATTAATTAACTAGAGCAAGCAAGCAAAGCATGATGATGGAGGTGATGATGATGTCGTTGCGAGCTGAGAGCTGATTAATCGGAAGCGGGAGGGGGGCAAGATCCGGGAGACAAGCGAGGCGCGCAGCCATGTTATGCGCCTCACAGTGGCTGCACGTGCACGCTGCCTCCATTGCCATTTGCCAGAGAGAGAGAGAGAGAGAGAGAGAGAGAGAGATCGGTGTGTGCTAGCTAGTGGCGCGCATGTAGTATGGATGAATGATTGGGCGGGTGGACCTGCAGAGACCACGCGACTACGCATGCAATTCGTCGCCTCCGCCGTCCGCCGCGCGCGCCCGCCGGTGCG…
336	Chr01	10441438	10020459	CATCTATCTATCTATCTATCTATCTATCTATCTATCTATCT	C	40	GTACTATTGCTACCTACCAATATAATACAGGAAAGTCAAGAGAAGAGATATCAAATCCAGATTCTAGCTAGACCCATCAACGAGAAATGTCTCCCAGACGTAATCTCCAGCTCCTCAATCGATCGATCGATCGTTCGTCCGCCGGTGTCATGCGTACATCACGTACCAACGTACCACAACACGGCGGCCGCCGGCCGGCGACGTTGGCACCGCAGCTATCTAGCGAGCTTGGTCGCAGCGCGTTACGCACGTACTCCCTCCGTCCCATAAAAAACCAATCTAGCATAAAATGTGACACACATCCTATTACAATGAATATATACATATCTCTGTTCAGATTTGTAGTACTATAATATGTCACATCTGGTTCTAGATTTATTTTTTATAGGATGGAGAAAG…	CATATGTACGTACTATTGCTACCTACCAATATAATACAGGAAAGTCAAGAGAAGAGATATCAAATCCAGATTCTAGCTAGACCCATCAACGAGAAATGTCTCCCAGACGTAATCTCCAGCTCCTCAATCGATCGATCGATCGTTCGTCCGCCGGTGTCATGCGTACATCACGTACCAACGTACCACCACACGGCGGCCGCCGGCCGGCGACGTTGGCACCGCGGCTATCTAGCGAGCTTGGTCGCAGCGCGTTACGCACGTACTCCCTCCGTCCATAAAAAACCAATCTAGCATAAAATGTGACACACATCCTATTACAATGAATATATACATATCTCTGTTCAGATTTATAGTACTATAATATGTCACATATGGTCCTAGATTTATTTTTTATAGGAT…
338	Chr01	10451629	10030645	T	TAGTCTCGGTTGGTGTTACCAGCTGGGACTAA	31	TGCTAGAGCTAGTGCACCCGCGTCCATCGAGATGCACAATAGACAGAGAAAGCTGCTATGCACACAATTTAGTTTGAACAAATAATAAAAGGGACGACAATTCATGGGACTTCTCTCTGATCGATCCGATAAAAATAATATAATAATACTTGTCACGTCTAGTGGATAAATACTATAATTTTATAGTGTCCAACAGCAAAACCGTATTCTTACAATGTCTTCTTATTAATACAATATTTTTGCGTGTTCTGTAACAAATTTTTGCTAAGAACTAGAGAGCTTCATACGCTTCCTTTATTTTTTTATACATTCACTAGTAGAGAAAGCGTTTGTAGTCCCGGTTCGTAACCCCCATTTAGTCCCGGTTTTCAAACCGGGACTACCAATCCAGAACTAAAT…	CTAGAGCTAGTGCACCCGCGTCCATCGAGATGCACAATAGACAGAGAAAGCTGCTATGCACACAATTTAGTTTGAACAAATAATAAAAGGGACGACAATTCATGGGACTTCTCTCTGATCGATCCGATAAAAATAATATAATAATACTTGTGACGTCTAGTGGAAAAATACTATAATTTTATAGTGTCCAACAGCAAAACCGTATTCTTACAATGTCTTCTTATTAATACAATATTTTTGCATGTTCTGTAACAAATTTTTGCTAAGAAACTAGAGAGCTTCATACGCTTCCTTTATTTTTTTTATACATACACTGGTAGAGAAAGCGTTTGTAGTCCCGTTTCGTAACCCCCCTTTAGTCCCGATTTTCAAACCGGGACTACCAATCCAGGACTAAAG…
339	Chr01	10455359	10034416	C	CTTCGCATCCCTCTCCATGTTCCCCTCCTGGTTCCCC	36	ACCCTTGTTGACCTGTCTTATATGCAACGTACTCATCCCAGTGATCCCTTAGCTTTGGGAATGTGTCGAAGTTCGGTGTCTGCCCCTTCAGGATATATTTTTGGTACAGATCTCCCTTGAAGCTCTGAAACTATTCTGCCATTTTCTTTAGAGTCCACCTTTTCACTTTGTCCTCTGTACCCGCGAGAAGGGTGAATGTCTTGAACATTGTGGTCCATAGCATCTCTTTCTCCGAATCTGGGACAAAGCTCTCATGATCTCCGCGTGCTCTTGTTCTGCGCCAGTACACCGTACTGACAGGCACGTTATCCCGCACAACCCAACCGCTGTGTCGTACGTAGTTCTTGGCTGCTTCTGCCGAGGCACTAGGTCAGCCGTCTTCATCCACTTCTGTTATGA…	TGCCCTTGTTGACCTGTCTTATATGCAACGTACTCGTCCCAGTGATCCCTTAGCTTTAGGAATGTGTCGAAGTTCGGTGTCTGCCCCTTCAGGATATATTTTAGGTACAGATCTCCCTTGAAGCTCTGAAAATGTTCTGCCATTTTCTTTAGAGTCCACCTTTTCACTTTGTCCTCTGTACCCGCGGGAAGGGTGAATGTCTTAGCATTGTGGTCCACAGCATCTCTTTCTCCGAATCTGGGACAAAGCTCTCATGATCTCCGCGTGCCCTTGTTCTGCGCCAGTACACTGTACTGACAGGCACGTTATCCCGCACAACCCAACTGCTGTGTCGTACGTAGTTCTTGGCTGCTTCTGCCGAGGCACTAGGTCGGCCGTCTTCGTCCACTTCCGTTATGA…
340	Chr01	10487322	10064979	TACACAGAAGGCTTTTGCCGCGTCTATTTTCTAGTGCTTCCTTTTTTTTTCTA	T	52	CTTCCATGTAAGACGACCTTTTTTTAAAAAAAATGCACTAATCTATACTTTCTTTTGCTTTATTATAATTTTTTATTCGATGTAGCGTAATTTGTTCTTCTCTTGATGGGCCCATGGTGGGCCTGTGGCCTTTTTTTTTTCCAAACTTCCATTTACCCATGCTTTTAAAAATAAACACATTTTTCAATTTGTCGAAAAATTTGTATGTTTTTGGTAAGAATTTTGTAAAACCTTAAATAATTCATAACTTCAAAATAAGCAGTACTGCATATAGAAAACGAGTATATGTGGTTGCATAACTTTTTTGCATAAAAAATCATCATTAATATATATTAAACATATCACACCAATGCAATGGGTATACTTTATTTCAAGCATTAAATGGATAAATACATTAGG…	TCTTCCATGTAAGACGACCTTTTTTAAAAAAAATGCACTAATCTATACTTTCTTTTGCTTTATTATAATTTTTTATTCGATGTAGCGTAATTTGTTCTTCTCTTGATGGGCCCATGGTGGGCCTGTGGCCTTTTTTTTTTCCAAACTTCCATTTACCCATGCTTTTAAAAATAAACACATTTTTCAATTTCGGTCGAAAATTTGTATGTTTTTGGTAAGAATTTTGTAAAACCTTAAATAATTCATAACTTCAAAATAAGCAGTACTGCATATAGAAAACGAGTATATGTGGTTGCATAACTTTTTTGCATAAAAAATCATCATTAATATATATTAAACATATCACACCAATGCAATGGGTATACTTTATTTCAAGCATTAAATGGATAAATACATTAG…
341	Chr01	10491877	10074938	A	ATATATATATATATATATATATATATATATATATATATATATA	42	AATGTTTGTGGTTGGTTAAGAGGAGAGGGCATTTGAAAAAAAAAAAAGTTTTATTTTGAGATAAGTTACTGTGATAGAAATAGCTACATTTTACAATAGAGGTAGTAGAAAGTTTTCGAAAGAACAGCATGGCACGAATAACCCATACTTCCATACCACAATGATAAGTTCTACTCCATATGGATTAGACAAGCACAAATGATGCTATGCCATTTGATGCGGGATATATTGATGAATATGTATGTTAAATATTATAAAAAGGTGGAAGGATACATGTTAAAATATTATGGAAATGATGTAGGATAATAAATTAACATGCTTACATGTTGAACTTTAAAATATAATTATGATTATGATATGATATGTATCCATGTTGAGTTATATAACTTTAGGAATAAA…	GGAATGGTTGTGGTTGGTTAAGAGGAGAGGGCATTTGAAAAAAAAAAGCTTTATTTTGAGATAAGTTACTGTGATAGAAATAGCTACATTTTACAACAGAGGTAGTAGAAAGTTTTCGAAAGAACAGCATGGCACGAATAACCCATACTTCCATACCACAATGATAAGTTCTACTCCATATGGATTAGACAAGCACAAATGATGCTATGCCATTTGATGCGGGATATATTGATGAATATGTATGTTAAATATTATAAAAAGGTGGAAGGATACATGTTAAAATATTATGGAAATGATGTAGGATAATAAATTAACATGCTTACATGTTTAACTTTAAAATATAATTATGATTATGATATGATATGTATCCATGTTGAGTTATATAACTTTAGGAATAAA…
342	Chr01	10635885	10148727	A	AATTGGATTCGGACTCTGTGCTGTGTTGTAGGTATG	35	TGCAATTTAGTAGCATGAGAATCTGAATTGTGCCACTTACAATATGCTCGCCACTTTAGCTCCTCTGGCGGCAGTATGATATGGTCTTGCGACAAATCAATTCGCTTATGTTTTAACAAATATAGTCAAAGATCTTATCGCATTTGGCTACATCAAATGTGATTTTTGTTTCGTCATGCCGAGCTTTAGGACCAACCGGCTCAAGGATACGACAAATGAATGGTTTAGATTAGATGTCCAAGCCCATTCAGTTGTATGCATGTCAACTAAATAGAGTTGGAGATAGGTAGCAAGAAGGAGGGGGATGTTGAATATAGAGGATAGGGGTAATAGATTGATTTTGTGACTGATTGGTTATTTCAATTGGCCTTGGCCCTTGATATTTATAGGAGGGGGTGG…	TGCAATTTAGTAGCATGAGAATCTGAATTGTGCCACTTACAATATGCTCACCACTTTAGCTCCTCTGGCGGCAGTATGATATGGTCTTGCGACAAATCAATTCGCTTATGTTTTAACAAATATAGTCAAAGATCTTATCGCATTTGGCTACATCAAATGTGATTTTTGTTTCGTCATGCCGAGCTTTAGGACCAACCGGCTCAAGGATACGACAAATGAATGGTTTAGATTAGATGTCCAAGCCCATTCAGTTGTATGCATGTCAACTAAATAGAGTTGGAGATAGGTAGCAAGAAGGAGGGTGATGTTGAATATAGAGGATAGGGGTAATAGATTGATTTTGTGACTGATTGGTTATTTCAATTGGCCTTGGCCCTTGATATTTATAGGAGGGGGTGG…
343	Chr01	10636594	10149470	TTCGATTCATAGCACATATAATAACCCGGTAAAGAAATAGAACAAAAAGT	T	49	TAATTCAATACTAGCTAGGTTTGCTATATTTTGTGGTGGAGGGAATATGGTAAAAAATATGCTAAAAGATGGATTTTCTAAATTATTGTAGCATTGAAAATGGAGAATATAGTGAACGTCATTCACTGTAGAGATGAGTTTTCATTTCTTTTAACACGTCCTCCTAGTTTTACATGTTATCTAAATAGCCATAAAATTTCTTTATAAGATAGACTAATACGTGATATATCACTTTGCAAATACAGAAGAATTAAATTTAATTTATAGAAGTTAAAACAGAAGGACCATGTATGGTTGTGAATACGCACACTATTCACAATCGAAATTTGTTTTTTTCAAGTTGTGTAGATCAAATTGAAAATACGTTGTGCTTTGATTTTTTTTTTTCTAAAAAATAGC…	TTAATTCAATACTAGCTAGGTTTGCTATATTTTGTGGTGGAGGGAATATGGTAAAAAATATGCTAAAAGATGGATTTTCTAAATTATTGTAGCATTGAAAATGGAGAATATAGTGAACGTCATTCACTGTAGAGATGAGTTTTCATTTCTTTTAACACGTCCTCCTAGTTTTACATGTTATCTAAATAGCCATAAAATTTCTTTATAAGATAGACTAATAAGTGATATATCATTTTGCAAATACAGAAGAATTAAATTTAATTTATAGAAATTAAAACAGAAGGACCATGTATGGTTGTGAATACGCACACTATTCACAATCGAAATTTGTTTTTTTCAAGTTGTGTAGATCGAATTGAAAATACGTTGTGCTTTGATTTTTTTTTTCTAAAAAATAGC…
344	Chr01	10643014	10155718	C	CTCCGACAATATTATCAATTTGATCTAAAACGATAAGTGT	39	GCACGATCCTAGTTTTGTAAAATTTCAATGGCACAGCTACGAATAGATGAATTGTAATATCATTTATTTGAATAGGCAAATTTGCAATAGCATCGATCCAATTAACCCCTAAAATAAAATGGGAGAGGATTCTAATACCTCAAGGAGATGTCCCCTCGTATATTTTTTTAAAAAAATCAATGTAAATGATTGCACAAAATTCTAAAAGAAAATAGGTAATGTACAGTATAATAACGCCTACAACTTCGCTAAAGATCATATTTAAATTCGATCTACACATTAAGAAATGAAAAACATAAGATTTGAATGGGTGTTGGATTTGTCTTTTTTATTTCTTAATATGTAGCTTATGTTTTGTGGGTAGTATAGGTATATTGTAGGAATGTTATCAAATTTTTT…	ACGATCCTAGTTTTGTAAAATTTCAGTGGCACAGCTACGAATAGATGAATTGTAATATCATTTATTTGAATAGGAAAATTTGCAATAGCATCGATCCAATTAACCTCTAAAATAAAATGGAAGAGGATTCTAATACCTCAAGGAGATGTCCCCTCGTATATATTTTTTAAAAAAATCAATGTAAATGATTGCACAAAATTCTAAAAGAAAATAGGTAATGTACAGTATAATAACGCCTACAACTTCGCTAAAGATCATATTTAAATTCGATCTACACATTAAGAAATGAAAAACATAAGATTTGAATGGGTGTTGGATTTATCTTTTTTATTTCTCAATATGTAGCTTATGTTTTGTGGGGTAGTATAGGTATATTGTAGGAATGTTATCAAATTTTTT…
345	Chr01	10648118	10161171	T	TCAGCCCATATAGAAATACAATTAGGAAATAACTGAAATT	39	TCGGAATTAAAAAAAGAAAAATTGAAAGACGCTCTCATGGCCTTAAAATTCTCACATTAATCGGAGAAAAAAAAAAGCAGAGTCCGCATAGAAATACAATTTAGAAATAGCTGAAATTCGGAATTAAGAAATAAGGAATATTAGAAGAGAAGACTAGAGTCCATATAGAAATACAATTTAGAAATAGTTAAAATTCGGAATTAAAAAATAAGAAATATTAGAAGAGGAGACTAAAGTCCATAAAGAAATACAATTAGGAAATAACTAAAATTCGGAATTAAATATAAGGAATATTAGAAGTATAGTATAGAGTCCATATATAAATACAATTAGGAAATAACTGAAACTCGGAATTAAAAATAAGGAATATTAGAAGTAGAGTATAGAGTCGATATAGAA…	TCGGAATTAAAAAAAGAAAAATTGAAAGACGCTCTCATGGCCTTAAAATTCTCACATTAATCGGAGAAAAAGAAAAAGCAGAGTCCGTATAGAAATACAATTTAGAAATAGCTGAAATTCGGAATTAAGAAATAAGGAATATTAGAAGAGAAGACTAAAGTCCATATAGAAATACAATTTAGAAATAGTTAAAATTCGGAATTAAAAATAAGGAATATTAGAAGAGGAGACTAAAGTCCATAAAGAAATACAATTAGGAAATAACTAAAATTCGGAATTAAATATAAGGAATATTAGAAATATAGTATAGAGTCCATATATAAATACAATTAGGAAATAACTGAAACTCGGAATTAAAAATAAGGAATATTAGAAGTAGAGTATAGAGTCGATATAGAA…
346	Chr01	10686844	10199666	CTTAAGTTTTCTCTCTTTTCATATGGAATCTCAAGAG	C	36	AAGAGGGGTATGAGATAGTTATATGTATTATGCATATACATGTCGGGCACTTTTTTTTTCTTCTAAGTATGATGATGCGAGCATGCTGCCTGAGGTACGAATTAGCATGTCCACTGTCCGTGGTGAGGGAAGACGAATAATTTGGTTAGTTGGACTCTGCACGATATGTTAGATAATCTATATATCCAATGGCTAGAAATAATGGTCTAAAATCGAGGGTCATATATTTTGTTTTATAAATTAATTATCAGTTTTTCTATATAAATCAGTAGAGCCATTAATTATATATGGTTGTGTATGTAATGCCTTTTATAACTTAAGTTTTCTCTCTTTCCCTATGGAATTCATAATTTCCTATGCGGAATTATCCATAGCTATGACCAATCTATGTTTGCCATC…	TTTTCTCAGACGAAAAGAGGGGTATGAGATAGTTATATGTATTATGCATATACATGTCGGGCACTTTTTTTTTTCTTCTAAGTATGATGATGCGAGCATGCTGCCTGAGGTACGAATTAGCATGTCCACTGTCCGTGGTGAGGGAAGACGAATAATTTGGTTAGTTGGACTATGCACAATATGTTAGATAATATATATATCCAATGGCTAGAAATAATGGTCTAAAATCGAGGGTCATATATTTTGTTTTATAAATTAATTATCAGTTTTTCTATATAAATCAGTAGAGCCATTAATTATATATGGTTGTGTATGTAATGCCTTTTATAACTTAAGTTTTCTCTCTTTCACTATGGATTTCATAATTTCCTATGCGAAATTATCCATAGCTATGACCAA…
347	Chr01	10703065	10213101	G	GGGCTTCGCCGGCGATGGGGCCGCTTCGCCG	30	TTATTTTTTTAAAAAAAAATTATAGTCGTTTAAATATATAGCATGCGAGACGTAGATGACAACACGTATGTCCATTCGATCGAGTTCGTTGTAATTGACTTCACTTTACCGTGCTTAAAACCACCAAAGTTAGCTAGGTGGGTCAGTTTAGAACTTTGAGAAGGCATGTGTGTCCTGAAGGTGTAAATAAATTAAATTACTTCCTCCCATAAGACATACATGAATTGGATTTTAGGTTCATTTTACTCATGCCGTTAAAATAGTTAAGAAATAATCCTCCAAAAAATATTAAATATCGATCATAATGCCGAATATTTCTACACGAACACAGAATATCAAATTATTCGATTTGTACCCTGACAAAGCAGTCATGGAAGATGAGGCGGACGAGGGCGGCGC…	ATTTTTTTTTTAAAAAAATTGTAGTCGTTTAAATATATAGCATGCGAGACGTACATGAGAACACGTACGTCTATTCGATCGAGTTCGTTATAATTGACTTCACTTTACCGTGCATAAAACCACCAAGTTAGCTAGGTGGGTCAGTTTAGAACTTTGAGAAGGCATGTGTGTCCTGAAGGTGTGTAAATTAATTAAATAACTTCCTCCCATAAGACATACATGAATTGGATTTTAGGTTCATTTTACTCATGCCGTTAAAATAGTTAAGAAATAATCCTCCAAAAATTATTAAATATCGATCATAATGTCAAATATTTCTACACGAACATAGAATATCAAATTATTCGACTTGTACCCTGACAAAGCAGTCGTGGAAGATGAGGCGGACGAGGGCGGCGC…
349	Chr01	10800272	10294498	TTCAATTTTAAAATTACTTAAGTTTATAAAGCTAAAATTTGAATT	T	44	TGGCCGGCCAGCTAGCGCAGCGCACAGCATCGATCTCGAAAAGCAATCGAAATTAGTCGCTATTTTTGGGGGCCTCACCGTGTTTTCTTGGAGTGGCCGCGTCCTCAGTTCTCACTAGCTATATATGTGAGTGTGCGTACGTGCCTCACGTTGTGCCAAGAAATACGTGCACTTGTGGGCGAAGCTAGCCGCGAAGGGGAGCGACAGGCTCATATAACGATTCTCCAAACGACGAGTAATTTGAAACGAGTAGTGCTGTACATCCGATCGACTCAATCATCCAACTCACATACGACCGTGCTGAACCAACAACCAATCACAAAAGCTATTATCATTCACATGGGGTTAGCCAAAACCATGTTTATATGCGTCGTGTACGTAGGTCGGACATGCAGGGTC…	CTGGCCGGCCAGCTAGCGCAGCGCACAGCATCGATCTCGAAAAGCAATCGAAATTAGTCGCTATTTTTGGGGCCTCACCGTGTTTTCTTGGAGTGGCCGCGTCCTCAGTTCTCACTAGCTATATATGTGAGTGTGCGTACGTGCCTCACGTTGTGCCAAGAAATACGTGCACTTGTGTGCGAAGCTAGCCGCGAAGGGGAGCGACAGGCTCATATAACGATTCTCCAAACGACGAGTAATTTGAAACGAGTAGTGCTGTACATCCGATCGACTCAATCATCCAACTCACATACGACCGTGCTGAACCAACAACCAATCACAAAAGCTATTATCATTCACATGGGGTTAGCCAAAACCATGTTTATATGCGTCGTGTACGTAGGTCGGACATGCAGGGTC…
350	Chr01	10822933	10316054	C	CTCTCTCTCTCTCTCTCTCTCTCTCTCTATCTATC	34	GTGACAGTGTAGCCATCTTGTTGGGCCACGTCGCAGGCCGTTTCGGGGCCATCAGCAATGCAGAAGCCCAATACAGGCCCAGTTCGGCCCAGCCCGGCCTGCGCATGAGCGGCGGCGGCTACAGAGATTGGAATCCCCTTCCCGATTGGAATCGGGCGGAGAGACGGGAGAGAGAGGAGAGGAGTCGAACTAGGGTTAGTGAGGTGAAGGGGGGCGATTTTGCTCATCGCCCTCCGCCTAGATCGAATCCGAATCCCGCCTCCTCCTCCTCCTCCTCCTCCCCCCGCGCCGATCTTGCCCCGCTCCCTCGCCGCAGCTGCGGGCTTGCCCTAGCCCGCCGCATCGCCGACGTACTACGCCCGCTCGGCTCCAGGCTCCAGATCCGGCCTCCAGGGCGTG…	GAGTGAGTGAGTGACAGTGTAGCCACCTTGTTGGGCCACGTCGCAGGCCGTTTCGGGGCCATCAGCAATGCAGAAGCCCAATACAGGCCCAGTTCGGCCCAGACCGGCCTGCGCATGAGCGGCGGCGGCTACAGCGATTGGAATCCCCTTCCCGATTGGAATCGGGCGGAGAGACGGGAGAGAGAGGAGAGGAGTCGAACTAGGGTTAGTGAGGTGAAGGGGGGCGATTTTGCTCATCGCCCTCCGCCTAGATCGAATCCGAATCCCGCCTCCTCCTCCCCCCGCGCCGATCTTGCCCCGCTCCCTCGCCGCAGCTGCGCGGGCTTGCCCTAGCCCGCCGCATCGCCGACGTACTACGCCCGCTCGGCTCCAGGCTCCAGATCCGGCCTCCAGGGCGTG…
351	Chr01	10828646	10321815	T	TTGCAGCTAGCTCGCTAGCAGTTATCTGAAGC	31	TTTCAGACTTTTGCCTGTTTTCTGGTGACCTAGTCCTAGTCAATTTTGATGTGAGCCTACAACCTCACTTTGCAAAATGTCCAACAATTTTACTGATATGATGGTTGGTCGGCCAGGCACCGAGCGAGTTGCCAAGACAGAACGCCTGCTTTTGTTTATGCAAAACAAAAATGACTGTCTTAAACTAGTACTAACTAACACTATCAAGCTGCAATGATAGATGCTAGGCTTGCTACCTATCTACTAGCTAGACAGTATATATTTATGCTACCGTGCAATCTCTAGCAGCTACGTACGTACCGACCTGATGTGAGCCCTGAGTGCTGCACTGAAACGCGGATGCACACCAATATCGGGCAGAAAAATGGTTAAAACCAAATGGATCATATGGACCACGGC…	GACTTTTGCCTGTTTTCTGGTGACCTGGTCCTAGTCAATTTTGATGTGAGCCTACTACCTCACTTTGCAAAATGTCCAACAATTTTACTGATATGATGGTTGGTCGGCCAGGCACCGAGCGAGTTGCCAAGACAGAACGCCTGCTTTTGTTTATGCAAAACAAAAATGACTGTCTTAAACTAGTACTAACTAACACTATCAAGCTGCAATGATAGATGCTAGGCTTGCTACCTATCTACTAGCTAGACAGTATATATTTATGCTACCGTGCAATCTCTAGCAGCTACGTACGTACCGACCTGATGTGAGCCCTGAGTGCTGCACTGAAACGCGGATACACACCAATATCGGGCAGAAAAATGGTTAAAACCAAATGGATCATATGGACCACGGCAGCAC…
352	Chr01	10833140	10326348	TACGGTTGTGCACGAGCGACCACAGTTGAAGCT	T	32	AATGCCATCCACAAGGCAGAATTTGACGACTCAAGACGACTTAAAAGGTGTCATCAACAGTAAACTAACTGTTTCTCCAAACATAAACCTTGTTTTTTACTACCATCAAGTGCTTCAGAGAGACGCATCTGATTTGTACGTACGCCATTATATTTTTCCCTGTTTGTGGAGATGGGCCAAGAAACAAGCATCACCTAACCAACTAAGAAATACCTGCTCAAACATGTTCTTTTGCAGCAAAAAAGGTAAAATAAAGCCGTGGATAGTGTTCTTGTGGGCGCAAATTAAAGCGGGAGAGAGCGAGAAGGGAGAGAGAGAATTGAAGCTATACCAATCGTCTCTGATGAGTCATAGCCAGTAACAGTTGGGCAGGCAAAAAAAAAAAAAACTAGAGGTGAG…	AATGCCATCCACAAGGCAGAATTTGACGACTCAAGACGACTTAAAAGGTGTCATCAACAGTAAACTAACTGTTTCTCCAAACATAAACCTTGTTTTTTACTACCATCAAGTGCTTCAGAGAGACGCATCTGATTTGTACGTACGCCATTATATTTTTCCCTGTTTGTGGAGATGGGCCAAGAAACAAGCATCACCTAACCAACTAAGAAATACCTGCTCAAACATGTTCTTTTGCAGCAAAAAAGGTAAAATAAAGCCGTGGATAGTGTTCTTGTGGGCGCAAATTAAAGCGGGAGAGAGAGAGAAGGGAGAGAGAGAATTGAAGCTATACCAATCGTCTCTGATGAGTCATAGCCAGTAACAGTTGGGCAGGCAAAAAAAAAAGAAACTAGAGGTGAG…
353	Chr01	10890330	10381477	CCTCCTACCTCACTCCCCTCCCCCAAATCGATCGA	C	34	TTGAAAGTTTGAAGAAATAGTATGGAACTAAACTCGGCCTTAATATATGACCCCTCCTAATATGTTCAGATACATTATTTCAGGAGAGATCACATCTTCTTAGATTGATTTTTTTAAAGAGGGAGTAGTTTGAAATAGTCGATACAAAATCATGAGAGAACACGCCATATGAATCTCCAATTTTCTTAACTATGAGCACCCAAGTCAACTCTAGCAACCGGGGAAATTGTTGTACTACAACTTTACGTCATTGTCATGAGTGAAGACAAGGTGTAAAAAACAAATTGTGGTTAGGTATTTGTTTGGTACCTTCGAGGTGAGTGGTGACGCTCAATGAAGAGAAGACTTGTCCGCGTGGGTTAGACGGTAAAGACCGGTTTTTCTACAAACATGTTACAA…	AAAAGTTTAAAGAAATAGTATGGAACTAAACTTGGCCTTAATATATGACCCCTCCTAATATGTTCAGGTACATTATTTCAGGAGAGATCACATCTTCTTATATTGATTTTTTTACAGAGGGAGTAGTTTGAAATAGTCGATACAAAATCATGAGAGAACACGCCATATGAATCTCCAATTTTCTTGATTAACTATGAGCACCCAAGTCAACTCTAGCAACCGGGGAAATTGTTGTACTACAACTTTACGTCATTGTCATGAGTGAAGACAAGGTGTAAAAAACAAATTGTGGTTAGGTATTTGTTTGGTACCTTCGAGGTGAGTGGTGACGCTCAATGAAGAGAAGACTTGTCCGCGTGGGTTAGACGGTAAAGACCGGTTTTTCTACAAACATGTTAC…
355	Chr01	10903334	10393657	GTCAAATGTTAGACAAAAAATATGGTTTATCTTTTTTTTTTTTTGA	G	45	AGTATGAGTGTATGACCAGATGGCAAACGTGCCTTGGCTATCTAGAACGACAAAGGCAGCAAATGCAGTTATGCAAAAGCGAAACCCATAAAAGGAAGGCTCTTCGTCAGTTGGCCGTCGATCGTCACACTCACACCACATCCAACTGCTAGTAGCTGCCAGATCTCACGGCCTCTAGTTGCTGCGGTTTGCAGACGTACGCCCCAGAGTTTGTTGCATCAAAGGTTAACAGACAACACATACGTGCGCACTGCCCAAAGGGAGGCACTGACAAAACGAAACTCCTGTCATCTGATTGCCCAATCAATCAATATATATTCTATATATTCCTAAAAAAACAAACCCTGATTTTCATATCCAACGTTTGATTGTCCGTCTTATATAAATTTTTTTTATAAT…	TTAAGTATGAGTGTATGACCAGATGGCAAACGTGCCTTGGCTATCTAGAACGACAAAGGCAGCAAATGCAGTTATGCAAAAGCGAAACCCATAAAAGGAAGGCTCTTCGTCAGTTGGCCGTCGATCGTCACACTCACACCACATCCAACTGCTAGTAGCTGCCAGATCTCACGGCCTCTAGTTGCTGCGGTTTGCAGACGTACGCCCCAGAGTTTGTTGCATCAAAGGTTAACAGACAACACATACGTGCGCACTGCCCAAAGGGAGGCACTGACAAAACGAAACTCCTGTCATCTGATTGCCCAATCAATCAATATATACTCCATCCGTCCTAAAAAAACAAACCCTGATTTTCATGTCCAACGTTTGATTGTCCGTCTTATATGAATTTTTTTTATA…
356	Chr01	10911343	10418170	CTCTCTCTCTCTATAGCTTTGCTTGATCATATCAATACCACCGCCCTACAAA	C	51	GGCACCATTGGGCACGGCACGATCTCGTGCAAGTTTCTCCCACAACATCACAGATTGTGCTGCATCTGCATGTGTGTCACACACCGGAGATCCAGCTGGGTGCGCCCGGCCGCCCGTGCGCGTGTGCGTGCGCATGTGTTCCTAAAGCCGTTTAATTTGAAGATTTGGGAGAGCAGAGAGCAGGAGGGTTCGCCCGTTCGTTTGGTAGCTAATAGGCGCGCTTTGCGTTGAATGCGCCCGCTTGCTGCCATTTTGCTTGTGGACTACCCTTTCTTCTTCTGTTATTACCAGGTTTCACTGCCGCAAGTCATCACACCGTCTACTCTGTATTATGACTCTCTCTCTCTCTCTCAAATCTACATCTATGATCTGTCACTGCTTCTCTCTCTCTCCAACACA…	ATTGGGCACGGCACGATCTCGTGCAAGTTTCTCCCACAACATCACAGATTGTGCTGCATCTGCATGTGTGTCACACACCGGAGATCCAGCTGGGTGCGCCCGGCCGCCCGTGCGCGTGTGCGTGCGCATGTGTTCCTAAAGCCGTTTAATTTGAAGATTTGGGAGAGCAGAGAGCAGGAGGGTTTGCCCGTTCGTTTGGTAGCTAATAGGCGCGCTTTGCGTTGAATGCGCCCGCTTGCTGCCATTTTGCTTGTGGACTACCCTTTCTTCTTCTGTTATTACCAGGTTTCACTGCCGCAAGTCATCACACCGTCTACTCTGTATTATGACTCTCTCTCTCTCTCTCTCTCTCAAATCTACATCTATGATCTGTCACTGCTTCTCTCTCTCTCCAACACA…
358	Chr01	10947459	10451676	GTGTATATATATATATATATATATATATATATATATATATATATATATATA	G	50	TCACTAACCACGAAAACTACGGCCCAAAATTGACAGCCCAAGCCCAGAGGTGGAGCGTCAAAGGCCGGCCGGCCGCGCGGTTGCGACGGTGTGTGATGCTACGTCACGCTGCCGGCGCCGCCGTAGCGGCGTAGCGAACTAGTAAGTACTAACCCGCCCGAGCGGTGAGCGACACGGGCCCGGTTCGTCGTGGCGTCGAGACGCGCACTCCCGTGCGACACGCGCGCGGGGGACGTCGTCGAGATCGACACGCACGCCGCTGTGCCGGCAGTGACGTGCGTACCACCGCGCTGCAGTGCAGGCAACTAAACGTAACCCCTAGCAAAGCACGTAGTCGATCGTACTCGTACCGATAGGCGATAGCTGCACCCACCGACGCAGCCACGACCGGGGGCCGCT…	TCACTAACCACGAAAACTACGGCCCAAAATTGACAGCCCAAGCCCAGAGGTGGAGCGTCCAAGACCGGCCGGCCGCGCGGTTGCGACGGTGTGTGGTGCTACGTCACGCTGCCGGCGCCGCCGTAGCGGCGTAGCGAACTAGTAAGTACTAACCCGCCCGAGCGGTGAGCGACACGGGCCCGGTTCGTCGTGGCGTCGAGACGCGCACTCCCGTGCGACACGCGCGCGGGGGACGTCGTCGAGATCGACGCGCACGCCGCTGTGCCGGCAGTGACGTGCGTACCACCGCGCTGCAGTGCAGGCAACTAAACGTAACCCCTAGCAAAGCACGTAGTCGATCGTACTCGTACCGATAGGCGATAGCTGCACCCACCGACGCAGCCACGACCGGGGGCCGCT…
359	Chr01	10970989	10474476	C	CAACACACACACACACACACACACACACACAC	31	TATGTACCTGATGGTTCAGTGAAATGAAAACAGCTCTCAAACTCATGTTATCTATCAATCCTTTTTCTAAAAGGGACTATTCATGCTCACAGATTAATCCTTGATCCTTGAATTCTCAAATTTGCAATTCATATCCCTACATTTGGATAAAATTCTCTCACCCAAACAGAACAAATATTTTTTTTGTCAATATCTGCTGGTTAGAATTAATGATACTGAAAATGAAGAGAACCTATAGCGTGTTGACAGCTAATGATTTGTTCACTCCCTCCAAGTAACAACTAACAATATTAATAAGATTCTCAAGCTAACTGTGATCGGTTACTTGCACCATGAGATCATATAAACTTATAATCAAGTTAGACTAAACCATTTCATCAAACTACTCCTTGTGTGTTT…	ATATGTACCTGATGGTTCAGTGAAATGAAAACAGCTCTCAAACTCATGTTATCTATCAATCCTTTTTCTAAAAGGGACTATTCATGCTCACAGATTAATCCTTGATTCTTGAATTCTCAAATTTGCAATTCATATCCCTACATTTGGATAAAATTCTCTCACCCAAACAGAACAAATATTTTTTTGTCAATATCTGCTGGTTAGAATTAATGATACTGAAAATGAAGAGAACCTATAGCGTGTTGACAGCTAATGATTTGTTCACTCCCTCCAAGTAACAACTAACAATATTAATAAGATTCTCAAGCTAACTGTGATCGGTTACTTGCACCATGAGATCATATAAACTTATAATCAAGTTAGCCTAAACCATTTCATCAAACTACTCCTTGTGTGTTT…
360	Chr01	11007253	10531311	A	ACCTTTTTTAACTAATCTACATGTATTGTTTCTAT	34	TTAAGCAACAATTTCACTATTATTATATTGGTAAAAAGGCATAATTATACCTGAGTACTTTGGAATATAAGTACAATAAATTTAATTTATATCATAAAATTTTTATTTTTAGTAGAGTAGCTGACTAACTATTAGTTAGTAAAAGTCCCGATTTGTCACTATTACAAGTGACAATTAAGAATTTATCACTAGACCCATATATTATAGACACATTTTTTTAGATAATGACATGTCATAGACACATGAGGACCCACATGTCATAGACTATGAGTGACAAATCCTTAATTGCCACATCTTAAAAGTGGAAAATAGTTGCATGCCCCTTTATCCTAACGAAACAAATTTTGCATTGTATTTTGAAAAGGAGGGAATATTACATAACTATTTTGGGCATGTTCG…	GCAACAATTTCACTATTATTATATTGGTAAAAAAGCATAATTATACCTGAGTACTTTGGAATATAAGTACAATAAATTTAATTTATATCATAAAATTTTTATTTTTAGTAGAGTAGCTGACTAACTATTAGTTAGTAAAAGTCCCGATTTGTCACTATTACAAGTGACAATTAAGAATTTACCACTAGACCCATATATTATAGACACATTTTTTTTAGATAATGACATGTCATAGACATATGAGGACCCACATGTCATAGACTATGAGTGACAAATTCTTAATTGCCACATCTTAAAAGTGGAAAATAGTTGCATGCCCCTTTATCCTAACGAAACAAATTTTGCATTGTATTTTGAAAAGGAGGGAATATTACATAACTACTTTGGGCATGTTCGGTA…
362	Chr01	11053224	10578148	T	TTTGTAATTAGTTTTGTAATTAGTTATGTAATTAG	34	GATGTTCGAGTGTTTTTACATCGCAAGACTGGACCTTTCGTTTGGAAGCGACGCCGGAACGCGATTCTCCATCCGCTGGCTACTTGGCGTTGGCGCACCAAGTGTAGGAAAAGAAATCCGAATTACCCTCTCAATTATTACTGTCTAAATTAAATTACCTTCCTAAACTATAAAACGAAACATTTTTTTCCGTTTAACTCTTTATAAACTAGACAGGTAAGACCCTATTTAGATGGGACTAAAACTCTTTTAAGTCCCTATCACATCGGATGTTTGGACATTAATTATAAATATTAAACCTAGACTATTAATAAAACCGATCCATAATCTTGGACTAATTCGCGAGACGAATCTAATGAGTCTAATTAATCCATGATTAGCCTATGTGATGCTACAGTA…	TGTTTTTACATCGCAAGACTGGACCTTTCGTTTGGAAGCGACGCCGGAACGCGATTCTCCATCCGCTGGCTACTTGGCGTTGGCGCACCAAGTGTAGGAAAAGAAATCCGAATTACCCTCTCACTTATTACTGTCTAAATTAAATTACATTCCTAAACTATAAAACGAAACATTTTTTTCCGTTTAACTCTTTATAAACTAGACAGGTAAGATCCTATTTAAATGGGACTAAAACTCTTTTAAGTCCCTATCACATCGGATGTTTGGACATTAATTATAAATATTAAACCTAGACTATTAATAAAACCGATCCATAATCTTGGACTAATTCACGAGACGAATCTAATGAGTCTAATTAATCCATGATTAGCTTATGTGATGCTACAGTAAACATTCTCT…
365	Chr01	11085970	10608397	A	ATTATTGGCCAATTCCGCCGCCGCTATATCCGTTTCTCCTGCAA	43	TGAGATTTGAAAATTTTCAACTCGAGATTTAAAAACTTTCAACTCGATTTGAAAATTTTCATATCCAAATTTTAAAAATTTAAAGTTAAGATTTAAAAATTTCTAGTAAACTAACCACTAGCAAAAATAGGAAACTAATCTAAACTAATTATCCTATCTCTGCGGCAGGAACAACAAACAGCGAAAAAAGAAAAAAAAAAGAAGAAAACAACGGCCTCAAAAAAAAAAGGGAGAGAAGCGCAAGCGCGCGTGCATGGGCCTTGCGGGCCGGAAATACGCGCCGACAACGCACGCGCGCAAATTAGGATTCTCGCAAAATATGCACCCCAGCAGCCGCGTTGACGGCATGTCACTTCTTGCACTCACGCGCAGCTAGGAATAAGTTCACTTTAGGTCCCT…	TTTCAACTTGAGATTTGAAAATTTTCAACTCGAGATTTAAAAACTTTCAACTCGATTTGAAAATTTTCATATCCAAATTTTAAAATTTTAAAGTTAAGATTTAAAAATTACTAGTAAACTAACCACTAGTAAGAATAGGAAACTAATCTAAACTAATTATCCTATCTGTGCGGCAGGAACAACAAACTGCGAAAAAAAAAGAAGAAAACAACGGCCTCAAAAAAAAAAGGGAGAGAAGCGCAAGCGCGCGTGCATCGGCCTTGCGGGCCGGAAATACGCGCCGGCAACGCACGCGCGCAAATTAGGATTCTCGCAGAATATGCACCCCAACAGCCGCGTTGACGGCATGTCACTTCTTGCACTCACGCGCAGCTAGGAATAAGTTCACTTTAGGTCCCT…
367	Chr01	11103363	10632195	T	TCTCTAACAATCATATATGCTAAGTCTAACAATATTATATTAAAT	44	GTCCAGGACAAAGTTGTCATTATCCCCGCGTGCCCTTGTTCTGCGCCAGTACACCGTGCTGACAGGCACATTGTCCCTCACAACCCAACCGCTATGGCGTACAAAATTCTTGGCTGCTTCTGCCGGGGCACTAGGTCGGCCGTCTTTGTCCACCTCAGTTATGATGTGCCGACCCTCTATCTTCTTCGCGGCACCTCGTTGTCCGCGTGCCCTCTTCTATGCAGCGGAGGGATGACTTCCACTAGCCTCCTCCTTATCGTTCCCCTCCTCGTTCCCCTCCGCATCCCTCTCCATGTTCCCCTCCTCGTTCAAGTACTGGTTTGGATCCTCGTTCCCCTCTCCTTCGTTCTAGTACTGGCTGCTTCCCTCTGCGATTGTATCGTATAGTATCTGTTCCTC…	GTCCGGGACAAAGCTGTCATTATCCCCACGTGCCCTTGTTCTGCGCCAGTACACCGTGCTGACAGGCACGTTGTCCCTCACAACCCAACCGCTGTGGCGTACAAAATTCTTGGCTGCTTCTGCCGGGGCACTAGGTCCGCCGTCTTCGTCCACCTCAATTATGATGTGCCGACCCTCTATCTTCTTCGCGGCACCTCGTTGTCCGCATGCCCTCTTCTATCCAGCGGAGGGATGACTTCCACTAGCCTCCTCCTTATCGTTCCCCTCCTCGTTCCCCTCCGCATCCCTCTCCACGTTCCCCTCCTCGTTCAAGTACTGGTTTGGATCCTCGTTCCCCTCTCCTTCGTTCCAGTACTGGCTGCTTCCCTCTGCGATTGTATCGTATAGTATCTGTTCCTC…
368	Chr01	11111221	10643001	T	TGCACTTCTCAATCTATCTATTTTTACCATAT	31	TCCCCCTATGTCTTTCATGTACATACTTCATATATATACCTATATATGTATAAATTTTATGTCTGTATATGTATACACTTTGGACATATAAAATATTTTTTATACATCCACATAAAACTTTATATATGTGTACATTTATACATGTACATCTAAACTTCATATATGTATATATACGGAGAATAGAATATTTTGTGGGTCCAGAAACCGAGTGCATGGGAGGATACGCGTGCGACTGATCGCTAATTAGCTATTTCAAACATGGATACCCAAAAGGTTCAATAATTGTGCATGCAGGGAAACCAGTGCAAGGTAGATTGATTTCGTTTGGTTTATATTATTTTTTATTCTCACATGAACAGGTATCATCCGGTTTTTATTTTCTTTATTCTCACGTGGACT…	ACGCGGTCAGCTCCCCCTATGTCTTTCATGTACATACTTCATATATATACCTATATATGTATAAATTTTATGTCTGTATATGTATACACTTTGGACATATAAAATATTTTTTATACATCCACATAAAACTTTATATATGTGTACATTTATACATGTACATCTAAACTTCATATATGTATATATACGGAGAATAGAATATTTTGTGGGTCTAAAAACCGAGTGCATGGGAGGATACTGATCGCTAATTAGCTATTTCAAACATGGATACCCAAAAGGTTCAATAATTGTGCATGCCGGGAAACCAGTGCAAGGTAGATTGATTTCGTTTGGTTTATATTATTTTTTATTCTCACATGAACAGATATCATCCGGTTTTTATTTTCTTTATTCTCACGTGGA…
369	Chr01	11149504	10672678	CACAATGCGGGTGGTCTGGCTGAGTGCCTTTTTC	C	33	CATTAATGAATCAGCATATAGAAGATAATGGCTTTTGAGGTATTGATTGTTGGTACCTTCAACCTCCTTTAAAGCTGAGTCCTTCTGTCTTGCCAGTTCTGCTTTGTCATTTTCCAGAGTTTGAATCTGCTTCTCTAGTTGAGATATCTTGGCAGCTTGCACTACATTGACTCTGGTTAATCAAGATTACAAAGATAGCAACACAAGTTAGTTGGGCAGAGTTTGTGTGTACCTTTTGATGAGCCGCTCAGTTCAAAATTGGATTCCTGGAGCTCAGCAATCCGATCCCTCAGATCATGTTCATTCTTCCTGGCAAGTTCTTTTGTCTCGTGCAGTTGATTCCTGGTGGCTTCGAGGGTTCCGAGATGAGGGACTAACCTTTCTAAGGTTGCCGTTTTA…	CATTAATGAATCAGCATATAGAAGATAATGGCTTTTGAGGTATTGATTGTTGGTACCTTCAACCTCCTTTAAAGTTGAGTCCTTCTGTCTTGCCAGTTCTGATTTGTCATTTTCCAGAGTTTGAATCTGCTTCTCCAGTTGAGATATCTTAGCAGCTTGCACTACATTGACTCTGGTTAATCAAGATTACAAAGATAGCAACACAAGTTAGTTGGGCAGAGTTTGTGTGTACCTTTTGATGAGCCGCTCAGTTCAAAATTGGATTCCTGGAGCTCAGCAATCTGATCCCTCAGATCATGTTCATTCTTCCTGGCAAGTTCTTTTGTCTCGTGCAGTTGATTCCTGGTGGCTTCGAGGGTTCCGAGATGAGGGACTAACCTTTCTAAGGTTGCCGTTTTA…
370	Chr01	11154761	10677926	CAATTGGTAGTCTGGTACTATAGAATAATGCAATAATC	C	37	GGCAGAACTTACGCTCGCCTGACGCTAGACCCAGTCAGTATTCAGTAGTAAGGCCTTGTTTAGATAAAAACTTAACACATGCATGTGGTATTAAATATGAAAAAAAAACCAATTATACAGTTTGCATGTAAATTGCGAGACGAATTTTTTTAGTCTAATTATACCATGATTTAAAAATGTGATGCTACAGTAAACATTTTCTGATGGCGGATTAATTAGGCTTAATAAATTTGTCTCGCAGTTTACAGGCGGAATCTGTAATTTATTTTATATTAGTCTATGTTTAATACTTTAAATGTGTATTTGTATACTTAAAAATTTTAAAAAAAACTAAACACACCCTAAGTTTAGTATTATTTATTTAACATTACTGCAACCATCCCCTATTGATCAGATATG…	GCAGAACTTACGCTCGCCTGACGCTAGACCTAGTCAGTATTCAGTAGTAAGGCCTTGTTTAGATCAAAAACTTAACACATGCATGAGGTATTAAATATGAAAAAAAAACCAATTGCACAGTTTGCATGTAAATTGCAAGACAAATTTTTTGAGTCTAATTATACCATGATTTAAAAATGTGATGCTAGAGTAAACATTTTCTGATGGCGGATTAATTAGGCTTAATAAATTTATCTCGCAGTTTACAGGCGGAATCTGTAATTTATTTTATATTAGTCTATGTTTAATACTTTAAATGTGTATTTGTATACTTAAAATTTTTTAAAAAAACTAAACACACCCTAAGTTTAGTATTATTTATTTAACATTACTGCAACCATCCCCTATTGATCAGATATG…
371	Chr01	11155229	10678351	C	CATTATAATGGGCTATAAGCAAGTTTGTTGGCAGTGGAACTCGTTA	45	TCCATCGAGTGCTATAGAATAATGCAATAATCAATTGGTAGTCTGGTACTATAGAATAATGCAATAATCAGATCCGTTTGATATACCTCCAGCCTCTAGTCCTATCTCTCTTGAATCTGAAGTCTCTAAGAGCAAGTTTAATAGCAGAGTTCACTGCTTACTATAAGTTAATATTGGAGCTAACTTGTATAATAGGTTAGCTATAAGGTCAACTTTATTTTTTCTATTCTCTCTCTCACTCTATAAATTTAATGCAAATTTTTTGGAGCTTATGTGAAGCTAGCTCTTGCATGAGAGCCAACACTACCCACTTTTTTTATTTCTCTCTTCCACATAAGCATATATAGCTTGCTTATAGCCCATTACTATTCTTGCTCTAAGAGTATTTCCAACAGAATG…	CCTGCCTTTGTTTTTTTTCTTCTCTGAAGAACACAGACAGGAATCCATCGAGTGCAATAGAATAATGCAATAATCAGATCCGTTTGATATACCTCCAGCCTCTAGTCCTATCTCTCTTGAAACTGAAGTCTCTAAGAGCAAGTTTGAGCTCACTGCTTACTATAAATTAATATTAGAGCTAACTTGTATAATAGGTTAGCTATAAGGTAAATTTTATTTTTTCCATTCTCTCTCTCACTCTATGAATTTAATGCAATTTTTTTGGAGCTTATGTGGAGCTGGCTCTTACATGAGAGCCAACACTACCCACTTTTTTTTATTTCTCTCTTCCACATAAGCATATATAGCTTGCTTATAGCCCATTACTATTCTTGCTCTAAGAGCATTTCTAACAGAATG…
373	Chr01	11237815	10772631	T	TATTACCCTATTAAAATTTTGGTAACTTTAAT	31	TATGTGTAATGGACAGCAGTTCGTTGGGAGCAGACATACGAATGATATATTGATTATTACATCACCCTATCAGGCAATGGAATTTGAACATTTTTCTTAAAATAATTCGTGGCAACGCCAGTTTGGAATTGGAAAATGTTAGGAGGAGCACTAGTGGAACGCGCCCGCCGTCCAGATATCGTCTGTCCGCTGATGACACGTCATCGCGCGGTGCCGCCACCGATCGATAGCGCGGCCGCTCGCTGTGCCGTGCGTGGTCAGGGAAATGGAATGTTCTGCCGAGGAGGGTGACGTGGCGCGCGTTTCTTCTGGACATTTGCGACGGTGGCGTTTTGACCGCGTGCGCTGCCGTTCAGCCTGGGCGCCCACGTGTCCCGACGACCAAAGGCTAGAGTTGGA…	GGGAGCAGACATACGAATGATATATTGATTATTACATCACCCTATCAGGCAATGGAATTTGAACATTTTTCTTAAAATAATTCGTGGCAACGCCAATTTGGAATTGGAAAATGTTAGGAGGAGCACTAGTCAATATTATAAGCTGGAGTCGCAGTGGAACGCGCCCGCCGTCCAGATATCGTCTGTCCGCTGATGACACGTCATTGCGCGGTGCCGCCACCGATCGATAGCGCGGCCGCTCGCTGTGCCGTGCGTGGTCAGGGAAATGGAATGTTCTGCCGAGGAGGGTGACGTGGCGCGCGTTTCTTCTGGACATTTGCGACGGTGGCGTTTTGACCGCGTGCGCTGCCGTTCAGCCTGGGCGCCCACGTGTCCCGACGACCAAAGGCTAGAGTTGGA…
375	Chr01	11266592	10802412	TTGAGAAATGTGAATTTGACATACAGCGTCTGTTTAT	T	36	TGCGACTCCACCGTGCGGTACCGCTGCTGCGGCGCCGGCCTCATCGCCGGGGCCTCCTCGTCATGGCGGCCGGCCCCGCCGAATCCCCCTCTCTCCATATCTCCCCCCCCCCCCCCACCCCAACCCAAGAGGTCGACGAACTGCACTGCACGGCACAGGGCGATCAATGATGTGAAAACCCAAGGGTTGGGTCAGTTAGCTAAGGAGCGGCCATGGCTCTACGAGGTCGGCATTGGCCGAGGCTCGCCGCCGGCGCGCTAGCTGCTTCGGGGGGGCGGGGGTCGCCGGCGTCGAGCGGTGGCGTGCGGCGGCGCGGATGAGATGAGAGGTGGCGGGGCGGGGAAGGAGGAGCGGCGAGAAAAGGACGGAGAGGTGGGAAAGGAGCGATGATCAAGTGTT…	GTCGTGCGACTCCACCGTGCGGTACCGCTGCTGCGGCGCCGGCCTCATCGCCGGGGCCTCCTCGTCGTGGCGGCCGGCCCCGCCGAATCCCCCTCTCTCCATACCTCCCCCCCCCCACCCCAACCCAAGAGGTCGACGAACTGCACTGCACGGCACAGGGCGATCAATGATGTGAAAACCCAAGGGTTGGGTCAGTTAGCTAAGGAGCGGCCATGGCTCTACGAGGTCGGCATTGGCCGAGGCTCGCCGCCGGCGCGCTAGCTGCTTCGGGGGGGCGGGGGTCGCCGGCGTCGAGCGGTGGCGTGCGGCGGCGCGGATGAGATGAGAGGTGGCGGGGCGGGGAAGGAGGAGCGGCGAGAAAAGGACGGAGAGGTGGGAAAGGAGCGATGATCAAGTGTT…
376	Chr01	11374118	10895602	T	TGTTGAACTTCTCAAAATTCCTCTCGTCGTTGTCTG	35	TTATTAAGCGTACGATATACTCCTACATTCATATATAGGAGTACCAAATATTAGTATGCACAAAACTCATATTCCTTTCACACCAAAAGCACAAAATAGACTTCTCCATAGTTACGGAACAACACACAAAAAATGGTCAGATAAAAGAACAAAACACACAGGAATACAAGCAATCGATCTCAAACATCTATGGGTGTGATTTTTCATTTTTCTTAACAGCATGAAAGGGACTGGCCGAGAAGTAATTTTCACAAACACAACGTAAGTCTCTCTGCTAGCTCTGGCCCGTGAGCTTGCAAGAGAGGCCAATGGGTATCCCACGCGCACACAGAGAGCCTATTTTAGTGGTTTTGATGAACACACGTCGGTGGTGATTTCGCCGATTATGGCCCTATTGGT…	TTATTAAGCGTACGATATACTCCTACATTCATATATAGGAGTACCAAATATTAGTATGCACAAAACTCATATTCCTTTCACACCAAAAGCACAAAATAGACTTCTCCATAGTTACGGAACAACACACAAAAAATGGTCAGATAAAAGAACAAAACACACAGGAATACAAGCAATCGATCTCAAACATCTATGGGTGTGATTTTTCATTTTTCTTAACAGCATGAAAGGGACTGGCCGAGAAGTAATTTTCACAAACACAACGTAAGTCTCTCTGCTAGCTCTGGCCCGTGAGCTTGCAAGAGAGGCCAATGGGTATCCCACGCGCACACAGAGAGCCTATTTTAGTGGTTTTGATGAACACACGTCGGTGGTGATTTCGTCGATTATGGCCCTATTGGT…
377	Chr01	11377670	10899163	GACAAAAAATACACATATATACCCACAAATTTA	G	32	GGTAAATTGGGACAAATCAAGCTTGATTTTGGTGGTCGCTTGGTGAGGATTATGATTGAAGGAGACCCGACTCTTCGGAATCCTTCAATAGAGATGTAAGATATATGGATTCAAACTTTGATGATCGGTTGTCTCCATCCTCTCATTGCCTTTGTATTTACTAATATGTGCTAAAATTGCTCAATCTACTCTTGTGCATGTGTAAACTTGGTGGTGACCCTATATTCTGATCACTGATATGGAAGTCATCAATGTAATGGTTGAGGGTTCGATTTCATCTCTAATAGCTTGAGAAAGGCAGCCGTTAGATACGAGGGAGTCACCTATGACAACTGATCAGCTGGTGGTGTCGAGCTGTCATAGATGATCCTTCAACCCAATGACGTGTGTGACCCTTAT…	TATACCTCACCTCAGTAAGGAAAAGTGGTAAATTGAGACAAATCAAGCTTGACTTTGGTGGCCGCTTGGTGAGGATTATGATTGAAAGAGACCCGACTCTTCCGAATCCTTCAATAGAGATGTAAGATATATGGATCCAAACTTTGATGATCGGTTGTCTCCATCCTCTCATTGCCTTTGTATTTACTAATATGTGCTAAAATTGCTCAATCTACTCTTGTGCATGTGTAAACTTGGTGGTGACCCTATATTCTGATCACTGATATGGAAGTCATCAATGTAACGGTTGAGGGTTCGATTTCATCTCTAATAGCTTGAGAAAGGCAGCCGTTAGATACGAGGGAGTCACCTATGACAACTGATCAGCTGGTGGTGTCGAGCTGTTATAGATGATCCTTC…
378	Chr01	11721275	10943824	G	GGAACGGAGGGAATCACCTCAACGAGCTACCCCTCCACCTCGCG	43	ATTGTCCTATTCATAAGACAAAGAATCACGACCTCTCGAGCTGCAAAGTCTTTCTCGGCGCCATGAAAGCTCTGTCTCCTAAGTCATACGTCCCCATCAGGGATAATGGCAAGGAACAAGGAGCGACTCCAACTTCAGATCGATTCGTTGGGGTAATCGATATCGATCCTCACGAACCATCAGTCTTACACCTTCTCGAAGACTATGGGTCATCGACAACGAGCGTGCCGCGGGAGGTATTGGCTATCGATGACGTTGGCACGTCAGCGCACGCCAACGCAGAAACGGGGAAACAATCGACTACTCCAGCCCAGCACATTGGGGCCGTTCAAGCTATACTGAGGGAAACTCCTTACGATCCCGTTCTGAACGATGACCTCGAGCATTGGACAGAACGAC…	ATTGTCCTATTCATAAGACAAAGAATCACGACCTCTCGAGCTGCAAAGTCTTTCTCGGCGCCATGAAAGCTCCGTCTCCTAAGTCATACGTCCCCATCAGGGATAATGGCAAGGAACAAGGAGCGACTCCAACTTCAGATCGATTCGTTGGGGTAATCGATATCGATCCTCACGAACCATCAGTCTTACACCTTCTCGAAGACTATGGGTCATCGACAACAAGCGTGTCGCGGGAGGTATTGGCTATAGATGACGTTGGCACGTCAGCGCACGCCAACGCAGAAACGGGGAATCAATCGACTACTCCAGCCCAGCACATTGGGGTCGTTCAAGCTATACTGAGGGAAACTCCTTACGATCCCGTTCTGAACGATGACCTCGAGCGTTGGACAGAACGAC…
380	Chr01	11760400	10982862	TCATTCTTTCTTCCTCCTATCCCCTCGGTTCCTGTCTTCTTCTCCTTTTT	T	49	TTAATGACGGATTAATTAGGTTTAATAAATTCGTCTCGCAGTTTTATGGCAGAATCTGTAATTTATTTTATTATTACACTACATTTAATACTTTAAATGTGTGTCTATATATCTGATGTGACAATAAAATCTAATTTTTTTCCCCAACTAAACCAGCCCTAAGAGTAAGGTCATCTATAGTCGATTTAATAGCCAATTGATACAGCAGTTACATATAAATATATATACTACACTACTAATATCTGATCCCTCCTATCATACACACATTACGTCTTGCAGTTCGTGTTGCATCTTGCTACAAATTTGTAGTCCACTGCTCATCTCTCTTATTTAATCTCCTCGATACGTGTTTATAGCTAGCTTATAGTCTGCTATTGTACCTGATCTAATAGAAATACT…	TAATGACGGATTAATTAGGTTTAATAAATTCGTCTTGCAGTTTTATGGCAGAATCTGTAATTTATTTTATTATTACACTACATTTAATACTTTAAATGTGTGTCCATATATCCGATGTGACAATAAAATCTAATTTTTTCCCCAACTAAACCAGCCCTAAGAGCAAGGTCATCTATAGTCGATTTAATAGCCAATTGATACAGCAGTTACATATAAATATATATACTACACTACTAATATCTGATCCCTCCTATCATACACACATTACGTCTTGCAGTTCGTGTTGCATCTGGCTACAAATTTGTAGTCCACTGCTCATCTCTCTCTTCTTTAATCTCCTCGATACGTGTTTATAGCTAGCTTATAGTCTGCTATTGTACCTGATCTAATAGAAATACT…
381	Chr01	11774800	10993248	C	CTCGGGATGAGAGTGGCGACTGGAGGCGAGGC	31	CAATTTGTAGGGCCCACCTGCCATCTATTTCCCCCTCTATCCCTCCTCTCCCCCATCTCGTCCCCCCTCTCTTCGCGTTAGAGGCGGCGCTCAGGATGGGGGCAGCGCCTGGTGGCGGAGCTCGAGATGGGGACGGCGGGTGGTGGCGGATGCGGCTGGAGGTGGAGCTCGGGAAGGGGCGGCGGCCTGTGGCGGAGGCGGTTGGAGGCAGGGCTCCGAATGGGGGGCGGCGGTTGGAGGCGGGGGTCGGGATGGGACGGCGGTCGGTGGGGGTGGCGGAGGCAGGAAAGGTGGCGCTAGGGATGGGGATGGTGGCCGGTGATGGAGGCAGCTGGAGGCGAGGCTCGGCATGGAGCGGCGGTCGGCAGCGGATGCGGTTGGAGGCGGAGCTCGGGAAGG…	AAAAAAAACAAACAATTTGTAGGGCCCACCTGCCATCTATTTCCCCCTCTATCCCTCCTCTCCCCGATCTCGTCCCCCCTCTCTTCGCGTTAGAGATGGGGGCAGCGCCTGGTGGCGGAGCTCGAGATGGGGACGGCGGGTGGTGACGGATGCGGCTGGAGGTGGAGCTCGGGAAGGGGCGGCGGCCTGTGGCGGAGGCGGTTGGAGGCAGGGCTCCGAATGGGGGGCGGCGGTTGGAGGCGGGGGTCGGGATGGGACGGCGGTCGGTGGGGGTGGCGGAGGCAGGAAAGGTGGCGCTAGGGATGGGGATGGTGGCCGGTGATGGAGGGAGCTGGAGGCGAGGCTCGGCATGGAGCGGCGGTCGGCAGCGGATGCGGTTGGTGGCGGAGCTCGGGAAGG…
382	Chr01	11799140	11023485	A	AGTGCGGGGAGGCGAGGCGGCGATGGAGGCAGTGA	34	ATTTTTTTAAAATAGAAAATGCTGACTGGATTGCCACGTAGGACAAAACCACTTTCAAATGGATCGAGGGGGGGTAATTCGTCCGGTATTGAAAGTTCGGGGTGAGCAATGTTTGGTTTTAGAGTTCAGGGGTGTAATTCGGTCGACCACGATAGTTCAGGAGAGTAATTCGTACTTTTTCCCTCGAACCAATTTAAAGCGGTTTTGTCCAACGTGACGCACACGTGGCAATCCAGTCAGCGTTTTTTTAATAAAAAATTATGGGACCCACTTGCCATACTCTTCTCCCCCCTCTCTCTCTCTATTCTCTCTCTCGCCGCTCGCGTAGCACGCACGCGAGGATGGTCGGCGACGGAGGAGGCAGCGGTGGCGGCGAGACGAGTCGGCGGCGGAGGCAGC…	AAATAGAAAATGCTGACTGGATTGCCACGTAGGACAAAACCACTTTCGGATCGAGGGGGGTAATTCGTCCGGTATTGAAAGTTCGGGGTGAGCAATGTTTGGTTTTAGAGTTCAGGGGTGTAATTCGGTCGACCACGATAGTTCAGGAGAGTAATTCGTACTTTTTCCCTCGAACCAATTTAGAGCGGTTTTGTCCAACATGGCGCACACGTGGCAATCCAGTCAACGTTTTTTTAATAAAAAATTATGGGACCCACTTGCCATACTCTTCTCCCCCCCTCTCTCTCTCTATTCTCTCTCTCGCCGCTTGCGTAGCACGCACGCGAGGATGGTCAGCGAGGGCGGTTGGCGACGGAGGAGGCAGCGGTGGCGGCGAGACGAGTCGGCGGCGGAGGCAGC…
384	Chr01	11809246	11033490	T	TTTAAACCAGTTTTCAGTTTATATGCTTGATAAG	33	GGCGGAACCGGAGACGGCCGCGGGGCGGCGAGGGTGGGCCGGAGGCCGGAGCGGGAGCGGGAGCGGGAGGCGAGGCGGAGTACACAGGCCATATGCTCCTCCTTCTCCTAGTGCTGCTGCTTCACCGGCGTGACGTCACCGGCGATTTGTGTGCATCGGCGGGGGAGGAGAAGGTCTGGATGGATTGGTAGGCGGCGGCGCGGTGGTGGTTGTGGAAGACGACGGCGAGGAGGAAGACGAGAAGTGCGGGACACTTCGGAGCAGCGAGGGAGTGGGACTCCTCCCTCCGTCTCTCTTGGGAGTGTTTGTTATGTTAGCTCGTGGAAAACATGGATCAAACGGAAGAGGATAGGTGACACTGAGCTGAGCTGGAGGATGGAGGTGAATAGGGGATAGCTG…	GGCGGAACCGGAGACGGCCGCGGGGCGGCGAGGGTGGGCCGGAGGCCGGAGCGGGAGCGGGAGCGGGAGGCGAGGCGGAGTACACAGGCCATATGCTCCTCCTTCTCCTAGTGCTGCTGCTTCACCGGCGTGACGTCACCGGCGATTTGTGTGCATCGGCGGGGGAGGAGAAGGTCTGGATGGATTGGTAGGCGGCGGCGCGGTGGTGGTTGTGGAAGACGACGGCGAGGAGGAAGACGAGAAGTGCGGGACACTTCGGAGCAGCGAGGGAGTGGGACTCCTCCCTCCGTCTCTCTTAGGAGTGTTTGTTATGTTAGCTCGTGGAAAACATGGATCAAACGAAAGAGGATAGGTGACACTGAGCTGAGCTGGAGGATGGAGGTGAATAGGGGATAGCTG…
385	Chr01	11843708	11070386	T	TCTTTCCTTTCTTTTTTTCCTTTCCTTTCTTTTTTTT	36	CGTTTCCCCTTTCGCAATCCTGCCATGGTTAGTAGCAAATAAGAAACATACACAAATATATGCACGCTCCTATCAACTACTAGGTAGTGGCAGCTCAAATATCACACACACTCAAGCTTTTAACCAAGCTCTTACAAGTTCTTACCAAAGCAAGCGGAAAGGTGACATACACCGACTCAACCAATCACCCCAATGGAGGTTGGATGTATTGATGCCTTGGCAAGCACTTGCTGTACGGCTGCAATCAAATCTGTAGAGCTCTGGGTAGGCTTAAATATGTAGCAAAGGAATAGCAAATGCTCAAATCAGAGAATGGAAAGTTGAATAATTGTTCAAAGTCAAGCACCGTACTGGTCCTAGGCTAAAACGTACCAGAGACGTGAACCTAGACACAAACGA…	GACCATCTCGTTTCCCCTTTCGCAATCCTGCCATGGTTAGTAGCAAACAAGAAACATACACAAATATATGCACGCTCCTATTAGGTAGTGGCAGCTCAAATATCACACACACTCAAGCTTTTAACCAAGCTCTTACAAGTTCTTACCAAAGCAAATGGAAAGGTGACATACACCGACTCAACCAAGCACCCCAATGGAGGTTGGATGTATCGATGCCTTGGCAAGCACTTGCTGTACGGCTGCAATCAAATCTGTAGAGCTCTGGGTAGGCTTAAATATGTAGCAAAGGAATAGCAAATGCTCAAATCAGAGAATGCAAAGTTGAATAATTGTTCAAAGTCAAGCACCGTGCTGGTCCTAGGCTAGAACGTACTAGAGACGCGAGCCTAAACACAAACG…
386	Chr01	11845272	11071988	G	GCACTTGAAGAAATTGATCTTGATATCATCTTTTCATCCATGATGTGAACAA	51	GAAACAAGCAAGAACAAGATAAAAGCAATCTGAATTGCAAATAGGAGTTGAATACGAATGATAAGTTGGGGTTCCGAAGAACAAACAGACGGACGGTCTAGCCGACACGCGCGCTGCAAGCAAGTAGCAATGACTAAACTTTAATATATCAAAACCCGAGAAATCCTGAAGGGGTATCTAGCTATATATAGGGGTGGGAGGATGACCTAGGGGTGCCTAGGGTCGTGCTCCACTAGCTTGGGGCGCACCCCACATGGGCCCCACTTGGGCCGGGGTCCCAAACATAATTACAAGCCCAGAGGCCCAAGACAGGTGACGCAGCACCTTGTTTATGTGATTACGGCCAAATTGCACGGAATTTGGCTATGAAGCTGGATCTGTTGGAAAGAGGGCTCTGAG…	GAAACAAGCAAGAACAAGATAAATGCAATCTAAATTGCAAATAGGAGTTGAATACGAATGATAAGTTGGGGTTCCGAAGAACAAGCAGACGGACGGTCTAGCCGACACGCGCGCTGCAAGCAAGTAGCAATGGCTAAACTTTAATCTATCAAAACCCGAGAAACTCTGAAGGGGTACCTAGCTATATATAGGGGTGGGAGGATGACCTAGGGGTGCCTAGGGTCGTGCTCCACCAGCTTGGGACCCACCCCACATGGGCCCCACTTGGGCCGGGGTCCCAAACATAATTACAAGCCCGGAGGCCCAAGACAGGTGACGTAGCACCTTGTTTATGTGATTGCGGCCAAATGACACGGAATTTGGCTATGAAGCTGGATCCGTTGGAAAGAGGGCTCTGAG…
387	Chr01	11850747	11077494	A	AAACAAATTATAGATTCTGCCTGTAAACTGCAAGACAA	37	AATGTGGCGCCTTTCGGTATATTGTCAAATTACTGTAAAATCACTCGAACTAGTCAATGTGTTAACACATTTTTCTCCATACGTTTCGATTGTAATAGTAGAAAGGACACTATATCACTGAAATAATACCAGCAATGATCTCTAACCGTTAGAGAACAAATGGCAACTTGATTAGAGCAAAAAGGAATTGAAGAAAATCTATATTTTCCTAGGACGGCCAATACTAAAAATTTATGTCAATATATCCCTAATTATCCACATCATCCATATTCATCCTTCTCATTTTCTCTCCCTCAATTATAAAAACCCTACAGAGTTGGCCTTTACCTAGGCATGCAACTATATATCCTATAGTACAGTGTGCATAGTATCATCTACCTCTCTATTTCATATTATAAG…	AATGTGGCGCCTTTCGGTATATTGTCAAATTACTGTAAAATCACTCGAACTAGTCAATGTGTTAACACATTTTTCTCCATACATTTCGATTGTAATAGTAGAAAGGACACTATATCACTGAAATAATACCAGCAATGATCTCTAACCGTTAGAGAACAAATGGCAACTTGATTAGAGCAAAAAGGAATTGAAGAAAATCTATATTTTCCTAGGACGGCCAATACTAAAAATTTATGTCAATATATCCCTAATTATCCACATCATCCATATTCATCCTTCTCATTTTCTCTCCCTCAATTATAAAAACCCTACAGAGTTGGCCTTTACCTAGGCATGCAACTATATATCCTATAGTACAGTGTGCATAGTATCATCTACCCCTCCATTTCATATTATAAG…
389	Chr01	11923169	11138602	TGATCTGAGATAACATATCTACTAATTTCAATGAAAATC	T	38	ACGTGGCGGATTGAGAGCGTTTGTAGGAAGTTTCATGGACTTTTAGTATAATTAATGGTATAAAATATAGTTGTGTAACCTTTATTTTAAACCGCGTGTTTTTTAAAATAATGGTTCTAAATAAAATTATATTATATTGTTAATATAATGGGTAAAATAATAGAATCCTAAAAATTTTATTTTCAAAGATTATGGATCTAATTTATTTACGTATATATTGTGATATATATAATCTATGTTTATAAAGTTATAGTTCTTTAAAATTTAATATCACTAATTATAGTTACGATCTCATCAGAGAAAAGAGGGGAGGAGATGGAAGCGGATGTAATTTTTAATGATATATGCAATATATATTTATTTGTTTTTAATTGTACGTTGCTGCGTTACAGTTGTATA…	GCCACGTGGCGGATTGAGAGCGTTTGTAGGAAGTTTCATGGACTTTTAATATAATTAATGGTATAAAATATAGTTGTGTAACCTTTATTTTAAACCGCGTGTTTTTTAAAATAATGGTTCTAAATAAAATTATATTATATTGTTAATATAATGGGTAAAATAATAGAATCCTAAAAATTTTATTTCCAAAGATTATGGATCTAATTTATTTACGTATATATTGTGATATATATAATCTATGTTTATAAAGTTATAGTTCTTTAAAATTTAATATCACTAATTATAGTTACGATCTCATCAGAGAAAAGAGGGGAGGAGATGGAAGCGGATGTAATTTTTAATGATATATGCAATATATATTTATTTGTTTTTAATTGTACGTTGCGTTACAGTTGTATA…
390	Chr01	11955528	11171453	G	GTTGCTTGTTGATGATTAGATTTAGCTAGATAGAAG	35	TCGGTGGCGCCGCCGCCACCGGCGCCGCACGTGACGTGGAAGTCGGAGCAGGTGCCGGATCTACGGCGGTCGCTGCTGCGGCCGGACACCGACCGCGACCCCGCGCCGCGGCGGCGGCGCTTGCGTGGCCCGAGCCACCGGAACGACCCGCCGCCGCCGCCGCCGCTGGCGGAGAGGGGAGGTGTCGGGGTCTGGGTCTGGGTCTCCGGGGCGTCGGCGAAGTGGGCGGAGGGGGGAGCGGTGGATCGGTCGGAGAGGCAGGGCTTCTTGTGGAAGGGGTGCCAGGAGGCGACGACCTCGGCGAGGTAGAGGTGCGGCGGGTGGTGGCGCATCGACGGCGCGCGAGGGGTCATCGGCGACGACGGGGGAGGGGAAGCATCGGGGTTAGGGTTTGGGTTG…	GTCGGTGGCGCCGCCGCCACCGGCGCCGCACGTGACGTGGAAGTCGGAGCAGGTGCCGGATCTACGGCGGTCGCTGCTGCGGCCGGACACCGACCGCGACCCCGCGCCGCGGCGGCGGCGCTTGCGTGGCCCGAGCCACCGGAACGACCCGCCGCCGCCGCCGCCGCTGGCGGAGAGGGGAGGTGTCGGGGTCTGGGTCTGGGTCTCCGGGGCGTCGGCGAAGTGGGCGGAGGGGGGAGCGGTGGATCGGTCGGAGAGGCAGGGCTTCTTGTGGAAGGGGTGCCAGGAGGCGACGACCTCGGCGAGGTAGAGGTGCGGCGGGTGGTGGCGCATCGACGGCGCGCGCGGGGTCATCGGCGACGACGGGGGAGGGGAAGCATCGGGGTTAGGGTTTGGGTT…
391	Chr01	11963102	11179087	A	AGGAGTCCAAAGTATGTTAGATTTTTATTCTGTTTTACACTCAAGCCTCC	49	TTGGTCAAATTTTTGAAATGTTGACTATCAATTTTATATTAGAATAAGTTTATAAAATCTAATAAATTTATGACATTATGATAGTACTTTTCAAGGTAAATCTAGCCTACCATCTTTTTTTTTCAACAAAGCATTTGAAAAATTATTAATGATTGAAGTTTCATAAGTTTGACATAAAAATCAAATATTTATGATTAGAGGGAGTATTTGGTATGTATCTCTTATGATCTTTTGATGATCTTGCAGATTAGGAAGCTTGATGACTCAGAGTTCAGAAATGCATTTTCACGGGCATATATCAGGGTATGGATTTATTTGTTTTTTGACCATGAGGGTTTTTCCTGTTTTTGCTATGATAATAGATAATATGTCTTCTAGATGCATTTGATTGTGATCTTT…	TGGTCAAATTTTTGAAATGTTGACTATCAATTTTATATTAGAATAAGTTTATAAAATCTAATAAATTTATGACATTATGATAGTACTTTTCAAGGTAAATCTAGCCTACCATCTTTTTTTTTTCAACAAAGCATTTGAAAAATTATTAATGATTGAAGTTTCATAAGTTTGACTTAAAAATCAAATATTTATGATTAGAGGGAGTATTTGGTATGTATCTCTTATGATCTTTTGATGATCTTGCAGATTAGGAAGCTTGATGACTCAGAGTTCAGAAATGCATTTTCACGGGCATATATCAGGGTATGGATTTATTTGTTTTTTGACCATGAGGGTTTTTCCTGTTTTTGCTATGATAATAGATAATATGTCTTCTAGATGCATTTGATTGTGATCTTT…
392	Chr01	12033138	11218633	G	GTCAATCAGTTTTAATCACTATCTCTACTTACTTCTTTACCTATA	44	GAATTAAAAATAGGGAATATTGAAAGAAGAGTCCATATAAGAACCCAATACGAGATTAATTAATATTTTAAATAAAAATAAAAATAAAATCTGAAATTAGTAAAAAAGAAAAAAAAGATAAGAGTTCAACTAGGAATATAATTTAAAATGAATTAAATTCGGAATTAAAAATAAGCACTATTGAAAGAAGAATCCATATAAGAACCTAATAAAAGATTAATTAAAATTCAGAAAAAAAATATCCAAATTTATAAAAATTAAAAGAGAGTTCAAGTAGGAATACAATTTTGAAACAACTAAAACTGAAAATAAAAAATAAAAATATTAAAGGAACACAATACGATATTATTAAAATTTAAAATAAAAATTCTGAAATTAGAAAAAGAAAAAGATTTCGAT…	GAATTAAAAATAGAGAATATTGAAAGAATAGTCCATATAAGAACCCAATACGAGATTAATTAATATTTTAAATAAAAATAAAAATAAAATCTGAAATTAGCAAAAAAGAAAAAAAAGATAAGAGTTCAACTAGGAATATAATTTAAAATGAATTAAATTCGAAATTAAAAATAAGCACTATTGAAAGAAGAATCCATATAAGAACCCAATAAAAGATTAATTAAAATTCAGAAAAAAAAATCCAAATTTATAAAAATTAAAAGAGAGTTCAAGTAGTAATACAATTTTGAAACAACTAAAACTGAAAATAAAAAATAAAAATATTAAAGGAACACAATACGATATTATTAAAATTTAAAATAAAAATTTTGAAATTAGAAAAAGAAAAAGATTTCGATT…
393	Chr01	12036010	11224837	TCCCCTAGCACCGGAGCGGCGGCGGCAGCCGC	T	31	GAAGTTTCTCCCCAACCTCACAGAGAAGTATGATGGCAGCATCAATCCCTCCGAGTTCCTCCAGATCTATACCACGATCATCGTGGCAGCGGGAGGGGATGACCAAATCATGGCGAATTATTTCCCCATGGCTCTTAAGGGTCAGGCGCGCGGATGGCCTATGACCCAGCCCCCCGACTCCATCCACTCCTGGGAGGACCTGTGACAGCAGTTTATCACAAACTTCTAGGGCACATACCCCCGTCCGGGGGAGGAAGCGGACCTACACGCTGTACAGTGGAAAGACGATTAGTCCCTCCGCTCATACATACAGCGCTTCTGCCAGGTCTGCAACACTATTCCGTGCATCCCGGCCCACGCGATCGTTTATGCGTTTCGGAACGGCGTACGGCACAACCG…	GAAGTTTTGCCCCAACCTCACGGAGAAGTATGATGGCAGCATCAATCCCTCCGAGTTCCTCCAGATCTATACCACGATCATCGTGGCAGCGGGAGGGGATGAACGAGTCATGGCGAATTATTTCCCCATGGCTCTTAAGGGTCAGGCGCGCGGATGGCTTATGACCCAGCCCCCCGACTCCATCCACTCCTGGGAGGACCTGTGCCAGCAGTTTATCACAAACTTCCAGGGCACATACCCCCGTCCGGGGGAGGAAGCGGACCTACACGCTGTACAGCGGAAGGACGATGAGTCCCTCCGCTCATACATACAGCGCTTCTGCCAGGTCTGCAACACTATTCCGTGCATCCCGGCCCACGCGGTCGTTTATGCGTTTCGGAACGGCGTACGACACAACCG…
394	Chr01	12111337	11300915	TTGTTTTTACCTCTAATAAAAACACACTTATAATCATTTTT	T	40	TTTAGCAAGTATCCTCTACGTGGTTTAAGCCAACACCAGTAAAGTTAGGTTGAACATTGTCGATTAGCGATATTTAAGAAGAAATGGATCTCTCGTTGAGTAAAGTATCTCCTCGTAACAAGTTAGGTTTAAGAAGAAATGGATCTCCCGTTAATTACAGTAAAGTATCACCTTAGAACACATGTTAATTACAGTAAAGTATCTTCTTAAAACACAAGTTGTGGCTGTAGTTTAGTGGTGAGAATTCCACGTTGTGGCCGTGGAGACCTGGGCTCGAATCCCAGCAGCCACATTATTCTTTTTTGTTTTTACCTCTAATAAAAACACACTTATAATCATTTTTTGTTTTTACCTCTAATAAAAACACACTTATAATCATTTTTTTGTTTTACGTTTTAT…	TTAGCGATATTTAAGAAGAAATGGATCTCTCGTTAAGTAAAGTTAGGTTGAACATTGTCGATTAGCGATATTTAAGAAGAAATGGATCTCTCGTTGAGTAAAGTATCTCCTCGTAACAAGTTAGGTTTAAGAAGAAATGGATCTCCCGTTAATTATAGTAAAGTATCACCTTATAACACATGTTAATTACAGTAAAGTATCTTCGTAGAGCACAAGTTGTGGCTGTAGTTTAGTGGTGAGAATTCCACGTTGTGGCCGTGGAGACCTGGGCTCGAATCCCAGCAGCCACATTATTCTTTTTTTTTTACCTCTAATAAAAACACACTTATAATCATTATTCTTTTTTGTTTTTACCTCTAATAAAAACACACTTATAATCATTTTTTTGTTTTACGTTTT…
395	Chr01	12111528	11301065	CAATTTTTTGTTTTACCTCTAATAAAAACATC	C	31	CAGTAAAGTATCTTCTTAAAACACAAGTTGTGGCTGTAGTTTAGTGGTGAGAATTCCACGTTGTGGCCGTGGAGACCTGGGCTCGAATCCCAGCAGCCACATTATTCTTTTTTGTTTTTACCTCTAATAAAAACACACTTATAATCATTTTTTGTTTTTACCTCTAATAAAAACACACTTATAATCATTTTTTTGTTTTACGTTTTATCTCTAATAAAAACACGCTTATATTTGTATTAAAATCATTTTTTTTACCTCTAATTCTTTTTTGTTTTTACCTCTAATAAAAACACACTTATAATCATTTTTTGTTTTTACCTCTAATAAAAACACACTTATAATCATTTTTTTGTTTTACGTTTTATCTCTAATAAAAACACGCTTATATTTGTATTAAAA…	AATTATAGTAAAGTATCACCTTATAACACATGTTAATTACAGTAAAGTATCTTCGTAGAGCACAAGTTGTGGCTGTAGTTTAGTGGTGAGAATTCCACGTTGTGGCCGTGGAGACCTGGGCTCGAATCCCAGCAGCCACATTATTCTTTTTTTTTTACCTCTAATAAAAACACACTTATAATCATTATTCTTTTTTGTTTTTACCTCTAATAAAAACACACTTATAATCATTTTTTTGTTTTACGTTTTACCTCTAATAAAAACACACTTATATTTGTATTCAAATCATTTTTTAATCATTATTCTTTTTTGTTTTTACCTCTAATAAAAACACACTTATAATCATTTTTTTGTTTTACGTTTTACCTCTAATAAAAACCCACTTATATTTGTGTTCAA…
397	Chr01	12115176	11304761	GGATATATATATATATATATATATATATATATATATA	G	36	TTCTTCTTGTTTTCATATTTCATTTTGAGATAAGCTTACCTTTATTTATAGTTCGAAAAAAAAACTTACATATGTGCAAGCCTTGTGCTTTTTTTTCTTATTTTTATATTTACTGTAAAAAAATGTCCGTTCGTTGCAACGGGTGAATGCTATTTTAATTTTATTATTCTTATATGGTTTAGCTAGGATGGAATTCACTGTGGGAATTTGCTTATAGTGTTTTTAAAATAATTAGCTGTAATTAGGAGTTCAACTTTCATCTCAAGTTAGCATGCAAGTTTTTCTAAAGAAATTTCTTATACGACTTCTTTTGTATTTTCCGAAAGCAAACGAACTTAAATCTGACTCATACACGGATCTATATTTCCAAAGAATGAACTTAAAAACCAATCTAAATAC…	TTCTTCTTGTTTTCATATTTCATTTTGAGATAAGCTTACCTTTATTTATAGTTCGAAAAAAAAACTTACATATGTGCAAGCCTTGTGCTTTTTTTTCTTATTTTTATATTTACTGCAAAAAAATGTCCGTTCGTTGCAACGGGTGAATGCTATTTTAATTTTATTATTCTTATATGGTTTAGCTAGGATGGAATTCACTGTGGGAATTTGCTTATAGTGTTTTTAAAATAATTAGCTGTAATTAGGAGTTCAACTTTCATCTCAAATTAGCATGCAAGTTTTTCTAAAGAAATTTCTTATACGACTTCTTTTGTATTTTCCGAAAGCAAACGAACTTAAATCTGACTCATTCACGGATCTATATTTCCAAAGAATGAACTTAAAAACCAATCTAAATAC…
399	Chr01	12116207	11305832	A	ATACAAATAACTAAAATTTGATATTAAAAATAA	32	GTATAGAGCCCATATAGAAATACAATTAAGAAAAAAAAAGAAATTTGGAATTAAAAAATAAGGAATATTAGAACCAGAGTATAGAGTCCATATAGGAATTTTAAACTAACTAAAATTTGGAATAAACATAATAAAATTAAAAGTAAAGTTTAGAGTCCGTATAAAAATACAGTTTACAAATAATTAAATTCAAAATTAAGAAAAACATGGAAAGAAGAGTTTAAGGTCAATATAAGAATACAATTTAGAAGTAATTGAAATTCAAAACTAAAAATTAAAGAATATTGAAAGATGAGTTTAGAGTCCACATAGAAATACAATTAGAAATAATAAAAACTCAGAAATAAAAATAAATAATATTGGAAGAAGAGCATAGAGTCTATATAGAAATACAATTTA…	GTATAGAGCCCATATAGAAATACAATTAAGAAAAAAAAGGAAATTTGGAATTAAAAAATAAGAAATATTAGAAGTAGAGTATAGAGTCCATATAGGAATTTTAAACTAACTAAAATTTGGAATAAACATAATAAAATTAAAAGTAAAGTTTAGAGTCCGTATAAAAATACAGTTTACAAATAATTAAATTCAAAATTAAGAAAAACATGGAAAGAAGAGTTTAAGGTCAATATAAGAATACAATTTAGAAGTAATTGAAATTCAAAACTAAAAATTAAAGAATATTTAAAGATGAGTTTAGAGTCCACATAGAAATACAATTAGAAATAATAAAAACTCAGAAATAAAAATAAATAATATTGGAAGAAGAGCATAGAGTCTATATAGAAATACAATTTA…
400	Chr01	12124365	11313327	T	TAGGCTTTGATTCAACACAGTGTACGTTTTCTATGAAGTTTCGCTCCGCAAAAGG	54	GAAGGGTTTGAACACAAATAAAAATTTTGTATTTAGGTCCCTTGCCGCCCTTTGAGAGGGCGATTTTTAAATATCGCCCTTCTTAAGGGCGGCAGGCAATTAGATTTGTAAATTTTCGAAACAAAAAATTATTTTTGTAAATATTTTAATAAAAAAATGTATAAATAAAAAAAATTCGAGCTGTCAACACATAAGTTGCGATCACGGAGCTAAAAAAATTGTTACGATCACGCAGCTAAAACAAATGTTCACAATAACTGATCAAAGATTGCAGCTGAATAAATGTGCACTATAATCGTTGTGATTGGAATAGCAGTTAACTCCCTAAAATTAAAATGGCAGCTGAACAAAATGTGCACAATAACCATCTTTACAATAACATATCAAGTGTTTTGAACT…	AAAAAAGGTAGTATGTTAGACATCAAATATATTTGGGTGAACGGAGTAGTATCGAACAAGAATGCCATTGCTCGACAGAACTGCCAATCTGCCATGCCGCCACAGTCCATGGTGCGTGGTGACAACCCAACGGGCCGAGGCCCACGGAGGCACCTGCCAAACTCTGGGTTACAGGCCGAGCTGTCAACACATAAGTTGCGATCACGGAGCTAAAAATATTGTTACGATCACGCAGCTAAAACAAATGTTCACAATAACTGATCAAAGATTGCAGCTGAATAAATGTGCACTATAATCGTTGTGATTGGAATAGCAGTTCACTCACTAAAATTAAAATGGCAGCTGAACAAAATGTGCACAATAACCATCTTTACAATAACATATCAAGTGTTTTGAACT…
401	Chr01	12188513	11469668	AGCATTTTGTTACTTACTGCTGGAGGTGGATTGAAGGCGTTGTATGGCAC	A	49	TCCCTCACCGATGAGAACCCTCCCCCACAGCTCGCACATAATATATAGTACCACATCTCCAAACAGTTGCCACCCCTGGAATGCCTGGATCCATATATATATTGTGCCGTTTCTAACTGGCCTAAGGAGTTCTCATCCAGCACAACCCAAGTTATTATCCAACCTCTTCCATTCCACCCTCGGACCTGTGGCATCGCAGATATCTCATCTCCACCTCTGACTGTTTTCTTCTTCGGCAGAGCAGCCTTTTTAGGCTGCTTGCCGGCCGACTCATTATCACTGTCATTGTCATCATCGCATATCATTTTCCTCTTCCGAGAGCCCGCTTGTTCAGTCGGGGCAGCACTGCTTTTTTGGGCGCCGGGTTGGATTTTTGGACCACCGGAAGCCTGGCCTTGA…	AATCTTCTTCTTGAAACCCCAGCCAAACAAAAACAAGCCTTGCATTGTTGGGGGATCCGGCTTCCAGCTCCGCGAAACCCTATGCCAAAAATATTTTGCTCTTCCTTTCAAAACCTCTAACAAAGGCTGGCATGCTAGCTGGTTTTACATCCAAAACCCAGATCCTGCTTTGCCCGAGTACTCGTGCTGCCCACCCAAGTACCAAGATATCTAGAACTCCCTTCCTATGGGCGAAGAATCTTCTCAAGCCCTCGAGCTGCTGAACAGATTATTGAAGATAAAGGAACACGGTATTCAAGGGGAGCAGATCACTCGGCACTTCATAAAGTGCCGACTGGCTCCAATCAAAGAAAGATACTACACGACCTTTGAGTATGATGGGAAGACTGACCCCAACTG…
404	Chr01	12221532	11511548	TTATAAATATTATTCAAAAAACTTGAGTAGTAG	T	32	CGTTAAGTTTTAAGCTACTTTGTTAGAGATACTCACCCATAAAAATAGGAGATCGATTTAATTTGGCTATGTATTATAGGACAAACAACTATTATGCCAAAATCCTGTCTAGCTACATATATGTAGCCAAAATTTTATGGATATTCATCTTTTTCTCCTTTTTAATTGATGAAAATAACTCTTAAGAGAGAAAATGGTTTTAGGGACAGAGATCAATAACTTGAGTTTATTTTTTCTAAAAAACAAGGCATGGGAGAGCACGAAACCAACGTAGCAGCAACACTACCAGAGATGGGATGGCTCGTGCGCACTAATTAGTTTTCTAATTGCTGTGTGAAAAAATATACACTACTATAATATTTTGGTGAATGATTGTGCAAAGTTGCATGCATAGAGTTT…	ACGTTAAGTTTTAAGCTACTTTGTTAGAGATACTCACCCATAAAAATAGGAGATCGATTTAATTTGGCTATGTATTATAGGACAAACAACTATTATGCCAAAATCCTGTCTAGCTACATATATGTAGCCAAAATTTTATGGATATTCATCTTTTTCTCCTTTTTAATTGATGAAAATAACTCTTAAGAGAGAAAATGGTTTTAGGGACAGAGATCAATAACTTGAGTTTATTTTTTCTAAAAAACAAGGCATGGGAGAGCACGAAACCAACGTAGCAGCAACACTACCAGAGATGGGATGGCTCGTGCGCACTAATTAGTTTTCTAATTGCTGTGTGAAAAATATACACTACTATAATATTTTGGTGATGATTGTGCAAAGTTGCATGCATTAGAGTTT…
405	Chr01	12282181	11564165	CTAAGTGATTGGGATAGATCGAACAGTAAGTCGAGACAATATAAATCAC	C	48	TTTAGAAGTGAACAATATGCTATTATTCATGTGCTAAATTTATCATTTTTTATTTCTCGACATGTAAGTTGAGTTTGAACCTAAGATAGTTGTATACATGTATCTTATGAGTGTTATCAAATTTTTTAGAGTTAACGAGGGAACATTTCTCGAGGAACCTTGTACTAGTAGCAGTAGGCAGCCAATAGTAGTGTAGTAGTATTTCTTTCTACTAAGTTCTTGAAGCTTCAGGGTGTATTTGGTGTATTTAGTTCACACTAAAATTAGAAGTTTGATTGAAATTAGAACGATGTGACGGAAAAGTTGGAAGTTTGTGTGTGTAGGAAAGTTTTGATGTGATAGAAAAGTTGGAAGTTTGAAGAAAAAGTTAGGAACTAAACCAGGCTTCAGTTGTACTCC…	TTTAGAAGTGAACAATATGCTATTATTTATGTGCTAAATTTATCATTTTTTATTTCTCGACATGTAAGTTGAGTTTGAACCTAAGATAGTTGTATACATGTATCTTATGAGTGTTATCAAATTTTTTAGAGTTAACTAGGGAACATTTCTCGAGGAACCTTGTACTAGTAGCAGTAGGCAGCCAATAGTAGTGTAGTAGTATTTCTTTCTACTAAGTTCTTGAAGCTTCAGGGTGTATTTGGTGTATTTAGTTCACACTAAAAATAGAAGTTTGATTGAAATTGGAACGATGTGACGGAAAAGTTGGAAGTTTGTGTGTGTAGGAAAGTTTTGATGTGATAGAAAAGTTGGAAGTTTGAAGAAAAAGTTAGGAACTAAACCAGGCCTCAGTTGTACTCC…
406	Chr01	12320189	11604820	CTAACCATTCAACTTTCTGAACATTCTACCATCACCACCAATACACATACACACT	C	54	ATCAACATTATAAGAAAAATAAAAAAGTTATCTATCAGTGTAAAAAAAACAAACTAGCTGTAATTACTCTCTTCGTTTTATATTATAAGTCGTTTGACTTTTTTTTTCTAGTCAAGCTTAACTAGTTCGTAGAAAAATTAGTAACAGCTAAATTATTAAATTAGTTTCATTGAATCTAACATCAAATATATTTTAATAATATGTTTGTTTTATGTTGAAAATACTACTATATTATTCTATAAACTTGGTCAAACAAAAAAATTTGACTAAAAAAATCAAACAACTTATAATATAAGATGTAGGGAGTACCGTGTATTAGAGTAATCGGATAAATTAATTCACTTCAAGCAAATATTTGAAATGATAAGGACTCAGCAAATTAAAGCTAGCTAAGATAAG…	CAACATTATAAGAAAAATAAAAAAGTTATCTATCAGTGTAAAAAAACAAACTAGCTGTACAGTACTCTCTTCGTTTTATATTATAAGTCGTTTGACTTTTTTTTTCTAGTCAAGCTTAACTAATTCGTAGAAAAATTAGTAACAGCTAAATTATTAAATTAGTTTCATCGAATCTAACATCAAATATATTTTAATAATATGTTTGTTTTATGTTGAAAATAGTACTATATTATTCTATAAACTTGGTTAAACTAAAAAAAGTTTGACTAAAAAAATCAAACAACTTATAATATAAGATGTAGGGAGTACCGTGTATTAGAGTAATCGGATAAATTAATTCACTTCAAGCAAATATTTGAAATGATAAGGACTCAGCAAATTAAACCTAGCTAAGATAAG…
407	Chr01	12338483	11622543	TTTGAAAAACTTTCAACTCAAATTTAAAACTT	T	31	ATAACCGCTTAGGAGGAGGGAATACATGCAACATACCAACAGAGCTAGACAATCCAAGATAAGCTAACATACACCAAGACAAGCCTACACAAACCTCGAGAATCCTAATTCGCGCGTACGCGCTGCCGGCGCGCGCTTCCGGCCCACGGCCCACGCGTATACGCGGTACCGCGCGTCGGCGCGATTTTTTTTCTGGGATTCTTTTTTTCACGGCGTGCGTAACTAATCCGTTAGATTTAGTGTGTAAAAATCATTAGATTTAGATAATGAAGATAATCAAGATAAGATTTGTTTTTTTCCGAAGATTTTTTTTAAGTAATAGATTGAAAAGAAATTTATACGTGAAGTCAAATTTTAAAAACTTTTAACCCAAATTTAAAAATTTTCAACTCAGATTTA…	ATAACCGCTTAGGAGGAGGGAATACATGCAACATACCAACAGATCTAGACAATCCAAGATGAGCTAACATACACCAAGACAAGCCTACACAAACCTCGAGAATCCTAATTCGCGCGTACGCGTTGCCGGCGCGCGCTTCCGGCCCACGGCCCACGCGTATACGCGGTACCGCGCGTCGGCGCGATTTTTTTTCTGGGATTCTTTTTTTCACGGCGTGCGTAACTAATCCGTTAGATTTAGTGTGTAAAAATCATTAGATTTAGATAATGAAGATAATCAAGATAAGATTTGTTTTTTTCCGAAGATTTTTTTTAAGTAATAGATTGAAAAGAAATTTATACGTGAAGTCAAATTTTAAAAACTTTTAACCCAAATTTAAAAATTTTCAACTCAGATTTA…
408	Chr01	12351529	11635506	TTGCATAATGTGTTTTATGACCAAAGAGCACT	T	31	ACAGCGCACATTCCACCTTTCAGTCCGATCAATAACAATATTTTGAGGATAGTCAGCAATTTGCAACCAATCAACATGTAGAGGGACTGGATAACTGTATACTACTGTAGTCTGCAAAATGCAGCCTGTGTAGATAAAACTGATCCATCAATCACCAATAATAAGAAGATGGCATTATGTGGTTGCTGCAGCTGTACATATATACTCCTGCTACTTAGGATGCTTGTTTGTAACGTCCAAAATGCTGGGAAGTCACGAGTGTACGTTGGCACTGAACAAGGTTGGGTTGGGTGCTGTGGAGGTCTCAAAACAGCAAGTTTGCAGCTGCAGTGAAAGAGACTGCACGAGAATATAGGTTGTATGATGTTGAAGGAATTGAGATTTCGTACTAAGAATGAC…	ACAGCGCACATTCCACCTTTCAGTCCGATCAATAACAATATTTTGAGGATAGTCAGCAATTTGCAACCAATCAACATGTAGAGGGACTGGATAACTGTATACTACTGTAGTGTGCAAAATGCAGCCTGTGTAGATAAAACTGATCCATCAATCACCAATAATAAGAAGATGGCATTATGTGGTTGCTGCAGCTGTACATATATACTCCTGCTACTTAGGATGCTTGTTTGTAACGTCCAAAATGCTGGGAAGTCACGAGTGTACGTTGGCACTGAACAAGGTTGGGTTGGGTGCTGTGGAGGTCTCAAAACAGCAAGTTTGCAGCTGCAGTGAAAGAGACTGCACGAGAATATAGGTTGTATGATGTTGAAGGAATTGAGATTTCGTACTAAGAATGAC…
409	Chr01	12372898	11662486	GGTGCTAAAGGGTGCCAACACCGAAGAATGCTATCTAGCGATC	G	42	ACCGTGGAGATAGAGAGGAGTGTGTGACCCACTGACATGTAGGTCCCACTATTTTTTATTTGAATGGTATGTTGGCCCCATATTTTTTGTTTTAATTTTTAATTTTTATATTTTGCTTTCAGTGCTACATCACTGGCATGTAGGCTAAGGACCAAGTCCAACCAACCATGTTGGTGCCATGTCAGCCAAATACCGCTATGTAAACCACCGAGGGATCTCGTCTGTACCGGTTTTGACAGTTGATTGACTGTTCTATCAGGTATCGTGGTTCAGGGACGAAAGTCAAACTCACTGTCAAGTTAAGGTATCTTAGATGAACTTATTCCTTTACTTTCCACTTACAAAAGCTACCGGCCCACGTCCTAACTAGGCCTGGTTTCTTTTCCTTTCAAACCACCA…	TCACCGTGGAGATAGAGAGGAGTGTGTGACCCACTGACGTGTAGGTCCCACTATTTTTTATTTGAATGGTATGTTGGCCCCATATTTTTTGTTTTAATTTTTAATTTTTATATTTTGCTTTCAGTGCTACATCACTGGCATGTAGGCTAAGGACCAAGTCCAACCAACCATGTTGGTGCCACGTCAGCCAAATACCGCTATGTAAACCACCGAGGGATCTCGTCTTTACCGGTTTTGACAGTTGATTGACTGTTGTATCAGGTATTGTGGATCAGGGACGAAAGTCAAACTCACTGTCAAGTTAAGGTATCTAGATGAACTTATTCCTTTACTTTCCACTTACAAAAGCTACCGGCCCACGTCCTAACTAGGCCTGGTTTCTTTTCCTTTCAAACCACC…
410	Chr01	12397582	11686851	T	TGTCAAAATTTGACATTTTTGGGTATATGCT	30	ACTCATTTTCTTCTAGGCAAATGGCATTGATCAATGCTGGTGAACAAGGATCAAGTCAAATGGCAACCCCTCTAAGGCCTCCAAGAGCTGCAAAGAAGATCACTCCAAAGAAAGGGAAAAAATAAGTGATTCTAAGTAGTATTTTCATTTGTGGACGATTTTCTAGTGGCAAACATAGGCTTTATTTTGCAATATGAACCTGTGTGACTTGGTTATGTAACCTCTTATATTTGGTTATGTAATCTGGATGGAATTCTCAAATTTGGTTATTTAGACTTGTTTGGCTTCTTGTACGAACAACGTATTATGGCTACATGCTGCCAAAATTTAAGTGACATTTTTTAGTATGTGCTGTGAATTTGACATTTTTGAGTATGTGCTGTGAAAATTTGACATTTT…	ACTCATTTTCTTCTAGGCAAATGGCATTGATCAATGCTGGTGAACAAGGATCAAGTCAAATGGCAACCCCTCTAAGGCCTCCAAGAGCTGCAAAGAAGATCACTCCAAAGAAAGGGAAAAAATAAGTGATTCTAAGTAGTATTTTCATTTGTGGACGATTTTCTAGTGGCAAACATAGGCTTTATTTTGCAATATGAACCTGTGTGACTTGGTTATGTAACCTCTTATATTTGGTTATGTAATCTGGATGGAATTCTCAAATTTGGTTATTTAGACTTGTTTGGCTTCTTGTACGAACAACGTATTATGGCTACATGCTGCCAAAATTTAAGTGACATTTTTGAGTATGTGCTGTGAATTTGACATTTTTGAGTATGTGCTGTGAAAATTTGACATTTT…
411	Chr01	12420726	11722975	T	TTACCTGCCCTTACCTAGGTATTGAAAAGGAGGGAG	35	AAAAGTGCCGAGGGAGTCAAATTGCACTGGTTTGAATAGTTCGGGGAGTCGTCCTATCCGGTATTGCGGTTGGAGGTAACGGATTAGATTCGTGTCACTTTTAAGGGATTCAAAGTGGACTTATTCTTCCGGCCGACGGCATACTCGGAGCTGGGCCTCCTCGGGCCCAACGAGGCCCATCCGGTTCGTGAACAATCTTCCTCCTGCCAGTAAATCTCTCCATCCAAACTCAATTCAATTGCCAGCGGAGACTCAATCGGTGCTAATGGGATCTGTGATTGGCTCCCTCCGGCTTGTTTGGTAACTCGAGTGAAGGGGATTGGGAGTTTACACGAGGGAATTGATGATGAGATTAAGATGGGAATTTGATTTTTAATTCCAATATCTTGTTTAGTAGAG…	CAAAAGTGCCGAGGGAGTCAAATTGCACTGGTTTGAATAGTTCGGGGAGTCGTCCTATCCGGTATTGCGGTTGGAGGTAACGGATTAGATTCGTGTCACTTTTAAGGGATTCAAAGTGGACTTATTCTTCCGGCCGACGGCATACTCGGAGCTGGGCCTCCTCGGGCCCAACGAGGCCCATCCGGTTCGTGAACAATCTTCCTCCTGCCAGTAAATCTCTCCATCCAAACTCAATTCAATTGCCAGCGGAGACTCAATCGGTGCTAATGGGATCTGTGATTGGCTCCCTCCGGCTTGTTTGGTAACTCGAGTGAAGGGGATTGGGAGTTTACACGAGGGAATTGATGATGAGATTAAGATGGAAATTTGATTTTTAATTCCAATATCTTGTTTGGTAGA…
412	Chr01	12423336	11725618	TACAGTGTCCATGGCCTGTTTTGTTCTAATGGTT	T	33	ACTCAAGGTGCACCGCCGATGTGCCGATCCCTCCCGCTCGCGCCGCCACCGATACCCTCACTCTTGTATTTTTGCCTGAATGAAAATTTGTCTCACTCTCATATTGAGAAAAGAGACTATCCTCCTCAAGCAAAGATGACATGGCCGGCGGAGAACCCCTCCGCGTCACGAGGCATGTGTGCTCCCTACCACACCACAGGTACTTTCCATTGCTTCTGCTACATTGATTTATTTCTGAACCATTTAGATTTGTCTGAATCAAATTTTCTTCCATCCTGTTAATCAGATGAAAAATTCAAAAGCAAACTAATGAGAGTTAAAATAAATTCTGAGCTTTACTCTGAAAACAGCTTAGGAAAGTTGATATTTTCATTAATTTCAGAACATCATGTTCCTTGT…	GGACTCAAGGTGCACCGCCGATGTGCCGATCCCTCCCGCTCGCGCCGCCACCGATACCCTCACTCTGGTATTTTTGCCTGAATGAAAATTTGTCTCACTCTCATATTCAGAAAAGAGACTATCCTCCTCAAGCAAAGATGACATGGCCGGCGGAGAACCTCCATGTCACGAGGCGTGTGTGCTCCCTACCTCACCACAGGTACTTTCCATTGCTTCTGCTACATTGATTTATTTCTGAACCATTTAGATTTGTCTGAATCAAATTTTCTTCCATCCTGTTAATCAGATGAAAAATTCAAAAGCAAACTAATGAGAGTTAAAATAAATTCTGAGCTTTACTCTGAAAACAGCTTAGGAAAGTTGATATTTTCATTAATTTCAGAACATCATGTTCCTTGT…
413	Chr01	12493857	11770666	A	AGTGAGGGAGTGCAGGAGGAGCGCGACGTCGG	31	GCCGCGTTCTGAGCAACGGCGAGCGAACATGACGTGGCTCTGGCTCTGACGTATGCCGCGGAGGAGGACGGCCGCCGATGCGTCTCCTGGCGACGCTGAGGAGGTCGATCGAGGCTACCGACGGGCACGGGCTTGTGGCTACGTACGTCTCCTGGTGGCGCTGTTGGCCAATGGCCAGGCGCGGAGGGAGCTCGCCGCCGCCGATGGGCTCTGAACCTCCGACTGACTTGAGGCATGTGGACGAGTCTACTGGTGGCGAGGATGAGGAGGCCGCCGCCAATACATCTCTGCCGATCTGGCCTCCCATACAACCTGTCGCAGCTGAGCCCAAACGTCGACGAGGAGCGCCTCGCCACCATCGCGCGCGCCGGGGGGGTGGGGGGGGGGGGGGGGCACACC…	GCGGGTGCCGCGTTCTGAGCAACGGCGAGCGAACATGACGTGGCTCTGGCTCTGACGTATGCCGCGGAGGAGGACGGCCGCCGATGCGTCTCCTGGCGACGCTGAGGAGGTCGATCGAGGCTACCGACGGGCACGGGCTTGTGGCCACGTACGTCTCCTGGTGGCGCTGTTGGCCAATGGCCAGGCGCGGAGGGAGCTCGCCGCCGCCGATGGGCTCTGAACCTCCGACTGACTTGAGGCATGTGGACGAGTCTACTGGTGGCGAGGATGAGGAGGCCGCCGCCAATACATCTCTGGCGATCTGGCCTCCCATACAACCTGTCGCAGCTGAGCCCAAACGTCGACGAGGAGCGCCTCGCCACCATCGCGCGCGCCGGTGGGGTGGGGGGGGGGCACACC…
414	Chr01	12572372	11841992	T	TATATAAATAGCAAATCAATGAGCCAATCGG	30	AGAAAACCCTAGATCTTATTAGAGAAAGATGAGAGATGAGTCATCTTCCCCCTTTCGCTGGCATGGATGCAAGAGATGGAGTACGGACCAAATGCTGACAACACATGAGATGCCCTTTACATGTCATTACTACAGGACCCCAAATGGATACTGGTTGGGAAACCACCATAGGACCCCACCATAGGTGTCGTTTTCCCAACTTGTTCCGATTTGGGGGAACTTATGTCCGTTGGCATAGGTGTTGGTTTCAAAATCGGTACCTATAATGTTCGGAACAAAAGAAAAAGTAGCCACCACTGTGGTGGATGCCATGCCCACCACCCTGGCTAGGGATTCACTGAATTAACAGAAAACAAAGGGAACCAGGTACCTGTTGACGAAAAATCCACGCTCACCGAT…	GATGAGTCATCTTCCCCCTTTCGCTGGCATGGATGCAAGAGATGGAGTTCGGACCGAATGCCGACAACACGTGAGATGCCCTTTACATGTCACTACTACAGGACCCCAAATGGGTACTGGTTGGGAAACCCACCATAGGACCCCACCATAGGTGCCAGTTTCCCATCCTGTACCGATTTGTGGGAACTTATGTCCGTTGGCATAGGTGTTGGTTTCAAAACCGGTACCTATAATGTTCGGAACAAAAGAAAAAGTAGCCACCACTGTGGTGGATGCCACGCCCACCACCCTGGCTAGGGATTCACTGAATTAACAGAAAACAAAGGGAACCAGGTACCTGTTGACGAAAAATCCACGCTCGCCGATAGTGCCGGAACTGTGTTGACGCGAATTAAGTCG…
415	Chr01	12584821	11856463	G	GGGGGAGGATTGGTTTTTCCCCTTTTTTTTGGC	32	CAAGCCAATAAGAAAACGACAGGGCAGTTTGCTCACTTGCTCAAGGGAAGAGCAAAAGGAGACAGCATAATCCTACAAAGTGTGCAAGTTTTCAGGAGAGATTGCGAGGTTAACAAGACTATTAGTGTCCCAAGGAGAACACTTCTGATATAGCTGCAGATTGCTAATCAGGATAGCATTTTACCACAACTTTGGTCTCTGTTCAGATTCATGCAGACCAACTCTAATCAGCAGTTCAGCACTACGAACAACTGGTCTTTTACCATACTTGCATTGTGATCTGTCTCTACAAACAGAACATATCCCACATACACTAAGGCAATGGAGCACTCTTCTGAATACTGATAAAATACTTCATTGCTAAGTTGTAAGACAGCTATGGCCAAATCCAACAAGGGA…	CTTTTCCATTAAATCAAAACTTTTCTACACACACAAAATTCCAACTTTTCCGTCACATCGTTTCAATTTCAACCAAACTTCCAATTTTGGCGTGAAAACACACCCTTAGTGTCCCAAGGAGAACACTTCTGATATAGCTGCAGATTGCTAATCAGGATAGCATTTTACCGGATAGCATTTTACCACAACTTTGGTCTCTGTTCAGATTCATGCAGACCAACTCTAATCAGCAGTTCAGCACTACGAACAACTGGTCTTTTACCATACTTGCATTGTGATCTGTCTCTACAAACAGAACATATCCCACATACACTAAAGGCAATGGAGCACTCTTCTGAATTCTGATAAAATACTTCATTGCTAAGTTGTAAGACAGCTATGGCCAAATCCAACAAGGGA…
416	Chr01	12612340	11874815	TATATCACGAAATACCAAAAGAAGTTGACCCAAATAGACCAAGCATGGTCGAGT	T	53	ATGTGTGGTCTTGTTTTAAAAATTTAATTGCAACGGATTTAATTGTGCAATCGGATCATGATTTGGATAAATAATTTAAGAGAAAAAATAGTTTAAAGTTTGCTTAGATGCATGCATGCAGGGTGACGTCATGATGACATGGGCGCTCGATTTTTCTAAAAGAAAAAATTAGGCGCCCGATCTGTAGTCGCCTCGAAGAATTTTGCTGTTTGGTTGGAGCCTCACCCTAAGCAAAATAGATCCCATAACGCTACACTATGTAAACTCTGAACAGCTCTGACTCTTGCAGTAAATAGCATGTACTACTTGCTAATTTTGGGCCTCCGGTTTTCTACACCGGACACCCCATGTGTTTACAATACTATTCTCTGAATCAATGGATGGTACACACATGACAAA…	CATGTGTGGTCTTGTTTTAAAAATTTAATTGCAACAGATTTAATTGTGCAATCGGATCATGATTTGGATAAATAATTTAAGAGAAAAAATAGTTTAAAGTTTGCTTAGATGCATGCATGCAGGGTGACGTCATGATGACATGGGCGCTCGATTTTTCTAAAAAAAAAATCAGGCGCCCGATCTGTAGTCGCCTCGAAGAATTTTGCTGTTTGGTTGGAGCCTCACCCTAAGCAAAATAGATCCCATAACGCTACACTAAGTAAACTCTGAACAGCTCTGACTCTTGCAGTAAATAGCATGTACTACTTGCTAATTTTGGGCCTCCGGTTTTCTACACCGGACACCCCATGTGTTTACAATACTATTCTCTGAATCAATGGATGGTACACACATGACAAG…
417	Chr01	12661016	11899795	CGTGGTATATATCCCCGGCGAGTTCCACGACCTCGCC	C	36	TCATCATATAAGTCAAAACTAAGCGCTATACCGACTTGAGGCCTCGAGCATATCGATTTTGTAAGTTAAGGGATATGTTATATCTGGTATTGCGGTTAAATTACGTGATTCAAACTCCGCGTTAAAATGAGGGAACTAGAGTGAACTTATTCCGGCTAAGAAAAGGTCTATGTTATGCATAAAGCAGAGGAATAAGTCTATTTTATCTTTCCCATCTCTTATCCCTAATCAAATTGTATCCCTCAACTCAACTCATAACGCTTCGCCTAACTTTAAAAACCAGTGCGAATATAGTCCGGACACCAGGCTACTGCGGCCACTGGTTGAGAGGGAGAAGAGACCGCAACCACAGGACCCCGAGCTCCCCGTCGCTCACTGTGGAGGTTTGAGGGGGCAGCA…	TCATCATATAAGTCAAAACTAAGCGCTATACCGACTTGAGGCCTCGAGCATATCGATTTTGTAAGTTAAGGGATATGTTATATCTGGTATTGCGGTTAAATTACGTGATTCAAACTCCGCGTTAAAATGAGGGAACTAGAGTGAACTTATTCCGGCTAAGAAAAGGTCAATGTTATGCATAAAGCAGAGGAATAAGTCTATTTTATCTTTCCCATCTCTTATCCCTAATCAAATTGTATCCCTCAACTCAACTCATAACGCTTCGCCTAATTTTAAAAACCGGTGCGAATATAGTCCGGACACCAGGCTACTGCGGCCACCGGTTGAGAGGGAGAAGAGACCACAACCACAGGACCCCGAGCTCCCCGTCGCTCACTGTGGAGGTTTGAGGGGGCAGCA…
418	Chr01	12684453	11921890	A	AATACACACACACACACACACACACACACAC	30	AGAATTTGCACCTGCTATGAAAGTCTTAGTATTTGTTTACTGGAAATGAATTAGTTAGCTAAGCTATAATTATTCAGCTTCAGATTCTTTATCAGCTAGATATATGGGCACCATGATTCAAATTGAGTATATACCCAATTCAAATAAGTATGAAATTTTTTTAAATGTTTAGGTATGAACATTAACTACTTCATTAACTAGTTCAAAGCAAGTTTGAACTTATTTTTGTTAGATTTTGATTCTAGATATATAACATCCAAACATATAATTAGTTATGTATGTAATATTGGATTGTGAAATAAAGTTCAATTTGAATTGTTTTGTTGCTAGGTATAGGTATGAATCAAATACTTATAACTAGGTATATACTCACAATTTGAAAATTTTGAAAACTTTGGA…	AAAATGTTTAAGGTGCTGAAGATTTTGAAAGAATTTGCACCTGCTATGAAAGTCTTAGTATTTGTTTACTGGAATGAATTAGTTAGCTAAGCTATAATTATTCAGCTTCATATTCTTTATCAGCTAGATATATGGGCACCATGATTCAAATTGAGTATATACCCAATTCAAATAAGTATGAAATTTTTTTAAATGTTTAGGTATGAACATTAACTAGTTCAAAGTAAGTTTGAACTGAATTTGAACTTGTTTTTGTTAGATTTTGATTCTAAGTATATAACATCCAAACATATAATTAGTTATGTATGTAATATTGGATTATGAAATAAAGTTCAATTTGAGTTGTTTTGTTGCTAGGTATAGGTATGAATCAAATACTCACAATTTAAAAAATTTGGA…
419	Chr01	12684797	11922280	T	TTATAAAAATTGAAGAAGTTTCTGCGGTTCGTCATCCGTGTTTGAGTCAGT	50	CAAATACTTATAACTAGGTATATACTCACAATTTGAAAATTTTGAAAACTTTGGACGAATTTATGTATTTCATACCATGGTGCCCGGGTACCATGGTGCACCATATGAGTGTCCTATATAGTAAATTTGTTTGGTGTAGGTATAGGTATGAATAGAATATATATATATATATATATATATATATATATATATACTCACCCTGTTACTTCTTATAATATCCATCTGTCTAAACAGGACTAAAATCTGAGATGTTTGTAGAACGAATTAGACCCTCAACTCTTCTGTGCTTAGTTGGTACAACTTTTATAATTCCTAATTAGTGTTGTAAATAATTTTTTTTATTAATATATAACTACTGCGCACTACTATTATAAAAATTGAAGATATTTTTGCCAGTAT…	AAATTTGGACGAATTTATGTATTTCATACCATGGTGCCCGGGTACAATGGTGCACCATACGAGTGTCCTATATAGTAAATTTGTTTGGTGTAGGTATAGATATGAATCGAATACACACACACACACACACACACACACACATATATATATATATATATATATATATATATATATATATGTTCACCCTGTTACTTCTTATAATATCCATCTGTCTAAACAGGACTAAAATCTGAGATGTTTGTAGAACGAATTAGACCCTCAACTCTTCTGTGCTTAGTTGGTACAACTTTTATAATTCCTAATTAGTGTTGCAAATAATTTTTTTTATTAATATATAACTACTGCGCACGTACTTTAAATCTCTACTATTATAAAAATTGAAGATATTTTTGTCAGTAT…
420	Chr01	12689754	11927319	G	GACTCTCTCTCTCTCTCTCTCTCTCTTTCTCTCTCTCTCTCTC	42	ACTTCTTTTTATTTTTTTTGCATACATCGATGCAGGAGGAGCCTGTGAAGGAAGGCAGGGGGCACATCTCGTCGCAATCAATGGTGTTGGGCGAATTTGATGGCGTGCAGAGCAATGAAGGATAGGGAAAGGGAGAGGGAGTGGAGGAGACGGTGAGCCAAGGGAGCACGGGAGGGGAGTGGCAGCGTCCTCCGGGGTCACCATCACCATGACCACCATTGGAGTCGGAGATGCTGGAGGCAGGGCGTGTGCTGTTCAAGAACCTCGCCACCGACTTCGAGGACCGCCTCTACTCGGTCCCCCTCGATGATGTGCGTAGGCCATTGGCGCCGAGGTGCGAAAGACGATGACAGCCACCGCCGACATTGTCCTAGCACCAAGGCCACAGACGATGACGAC…	TGCATACATCGACGCAGGAGGAGCCTGTGAAGGAAGGCAGGGGGCACATCTCATCGCAATCAATGGTGTTGGGCGAATTTGATGGCGTGCAGAGCAATGAAGGATAGGGAAAGGGAGAGGGAGTGGAGGAGACGGTGAGCCAAGGGAGCACGGGAGGGGAGTGGCAGCGTCCTCCGGGGTCACCATCACCATGACCACCATTGGAGTCGGAGATGCTGGAGGCAGGGCGTGTGCTGTTCAAGAACCTCGCCACCGACTTCGAGGACCGCCTCTACTCGGTCCCCCTCGATGATGTGCGTAGGCCATCGTCAAACACCGTCATCCTGGCGCCGAGGTGCGAAAGACGATGACAGCCACCGCCAACATTGTCCTAGCACCAAGGCCACAGACGATGACGAC…
421	Chr01	12696381	11934097	T	TTGAAACAGAGTGGAAATGTGAAAATGTGAAGATTCAAGCTTTCAATCT	48	GGAGGGTGTCGTGGTCGTCGGGGAGCGGGATGCGGTAGAGGTTGCCGGTGGAGGGTGGGTGGCCACGCCGCAGCAGATCAGGTCGGGGATCTCCAGAGAGCTGAAGACGGTGACGAGCAAGTCCGCCGGCAGATCAGACCAGTCGCTGCCACGGCAGTCTGCCACGGCGTTCGCCCGAGATTTCTCCGTTCATGGATTCCCACCCGCTCTTAATCCCGCTCTTAATCTATCAATCAATCTACAGGACATATAAATCTACAAATCAATCTACAGGACATATAATCTATCAATCAATCTACAGGACATATAGTAGATATATTTTCAGAAACTCATAATCTATCAATCAATCTAGAGGACATATAATCTATCAATCAATCTACAGGACATATAGATATATTT…	CTGCGCGCCCGTGATCGATCGGGTCGAGGAGGTGGAGCTCGGAGTGCTCGTCGGCGGCGGCGGTCGGCTTCGCGGGAAGGGGCCACGTCCGGGAGCGTGGAGGTTGCCGGTGCAGAGGTGGCGCAGGGTGGCCACGCCAGCGGGCGACGAGGCAGGGGCCCTGGACGTTGGAGCAGAGGCCCAGCCGACGGACGGACGAGTGCTCGGCGTGCCATAATCTGCAGACGACGCCGCAGCTGAGCAGATCGGGGATCTCCAGAGAGCTGAAGACGGTGACGAGCAAGTCCGCCGGCAGATCAGACCAGTCGCTGCCACGGCGTTCGCCCGAGATTTCTCCGTTCATGGATTCCCACCCGCTCTTAATCTATCAATCAATCTACAGGACATATAGATATATTT…
422	Chr01	12731683	11959887	AATCTGGACAGATGCATGTCCAGATTCATTG	A	30	TGTGATGCAATGCAGCACATCCTTTGCAAGTTGCAAGCTAATAATGTACGCTGCTACTCCCTGCTTAGTATTAGGCAATCGTTGTCACTTGGGACGACGGTTGAAGGAAAAGCTCTAATTTATACCTGTCGCCCGTCGGGGCGGCACCCACGCATCCATCGGTTGAAGTTGAGGCCGCGACCGCGCAACCTGCGCTGCGATGGGTCGTCACGGACGTGTGTAGGTGTTGTGTGGTGCACACTGCACAGTGGTCACCGTTTTCTTTGGTCCGCTCGCACTTGATCTTCCCAAATCACAACTCCGTTCACTTTATTGAATTATAATTACTGCAAATTATTTGCTCCACGTACTCCCAGCAAACGTCTCTCTTATTAATCTGTATTGCTTAGATAACTATTT…	GATTTCAGGGACACAACATAAGAAGACGTCCCGTCCGTCCGTCCTGTGATGCAATGCAGCACATCCTTTGCAAGTTGCAAGCTAATAATGTACGCTGCTACTCCCTGCTTAGTATTAGGCAATCGTTGTCACTTGGGACGACGGTTGAAGGAAAAGCTCTAATTTATACCTGTCGCCCGACGGTGCGGCACCCACGCATCCATCGGTTGAAGTTGAGGCCGCGACCGCGCAACCTGCGCTGCACAGTGGTCACCGTTTTCTTTGGTCCGCTCGCACTTGATCTTCCCAAATCACAACTCCGTTCACTTTATTGAATTATAATTACTGCAAATTATTTGCTCCACGTACTCCCAGCAAACGTCTCTCTTATTAATTTCTGTATTGCTTAGATAACTATTT…
424	Chr01	12804550	12039372	ATGCTAGCTCCTCGGCTCCTGCCTTCTCCAGGTCCAGGC	A	38	TTCTTCACGCCTAGTGATGATGCAGAGGGGATTCCCGCTTTAAGTATGGATGTCCTCGTCGTGGAATCATGAGCGTAATCTTGGAAACGGCGACATGAGCGGAAAACGGCGAACAAAACGGCGCACAAGAGGAGAGCAACGGAATATGGGTGGCATGCAACAATATGCCCCAAGAAAGAGTGGGGTTTTGTGATAAAAATTAGTTAACATGATGTGGTTTTGTGATAGATGTGCCCCAAAATCTGGGGTTTTGTGATATTTACTCTTTTTAAATTCTTGCAAAGTATAGGCAATATGCTAAGTATGAATAGCGAGAAACTTGCTAAAACTGTAAGTTGTATTTATCGCAAAACCGCGACGAAATTCACGTGAAAATTGCTGCAGCTTGCCCCACCGCCT…	TTCTTCACGCCTAGTGATGATGTAGAGGGGATTCCCGCTTTAAGTATGGATGTCCTCGTCGTGGAATCATGAACGTAATCTTGGAAACGGCGACATGAGCGGAAAACGGCGAACAAAACGGCGCACAAGAGGAGAGCAACGGAATATGGGTGGCATGCAACAATATGCCCCAAGAAAGAGTAGGGTTTTGTGAAAAAAATTAGTTAACATGATGTGGTTTTGTGATAGATGTGCCCCAAAATCTGGGGTTTTGTGATATTTACTCTTTTTAAATTCTTGCAAAGTATAGGCAATATGCTAAGTATGAATAGCGAGAAACTTGCTAAAACTGTAAGTTGTATTTATCGCAAAACCGCGACGAAATTCACGTGAAAATTGCTGCAGCGTGCACCACCGCCT…
425	Chr01	12821853	12053482	G	GAAAAAACACCTTCAAATCTTGGCCATCTCTC	31	TCCGAGAGAAATCAACTCTTGCCGTTTCCTGACCGTTATTCTAGCACTTTAAATACCAACCGTTGTCCCCGAAAAATCTCACACCGTTTTCCTCCGTTTTTACCGCTGAAGCAAGCTCCGTCTTGTCTCTCTTCGGCGATCCCCTCGGTGCACGAAGCGATCCCCAAGCGATCCCTTCTCCGGCCAGATCTCCGCCTACGGCGATGTCGTCATCTGCCAGTCCATCTGCCGCACCATCAGCCGAGTACGCTGAGGTAAGTTCTCATCAGCTAGATCTCCTTTTCTCACATCAGATTGGATTTCCTACTCCTCATCTTGTTTTTCCCCTTCCTAGTTCTTCTGGATTTGTAGCATCTCTCCAACTTAGTTGCAATTCCAAGCCTATCGCATGAAAATTAC…	CATACGTCGACTCCGAGAGAAATCAACTCTTGCCGTTTCCTGACCGTTATTCCAGCACTTTAAATACCAACCGTTGTCCCCGAAAAATCTCACACCGTTTTCCTCCGTTTTTACCGCCGAAGCAAGCTCCGTCTTGTCTCTCTTCGGCGATCCCCTCGGTGCACGAAGCGATCCCTTCTCCGGCCAGATCTCTGCCTACGGCGATGTCGTCATCTGCCAGTCCATCTGCCGCACCATCAGCAGAGTACGCTGAGGTAAGTTCTCATCAGCTAGATCTCCTTTTCTCACATCAGATTGGTTTTCCTACTCCTCATCTTGTTTTTCCCCTTCCTAGTTCTTCTGGATTTGTAGCATCTCTCCAACCTAGTTGCAATTCCAAGCCTATCGCATGAAAATTAC…
428	Chr01	12928488	12148117	A	ATATATATATATATATATATATATATATATATATATATATATATGTATATA	50	CCTCTCATTCAAATTTCCCTTCACATCAGCGTCAGTCATGCCTGTGACCCTCTTAAGACCGTTTGTGATACAGCATGTGTCCTCTCATTCAAACTTCCCTTCACATCAGCGTCAGTCATACCTCCCTGAAGAGGGTCTCAGTCAAAACACACGATCAACTCCACCTTTTGTTCCTTTTGTACACCTATACGTATGTATATATTTTGCATGCAAATGTATAAACTTTATATGTGTATATAAAGTTTATATATAAACATATGTATACCAAGTACGCACACATAAAGTGTATTTATGTATGAACTTTATATATATATACACTTATATAACTTTTTTGTATGTATAAATTTATACGAATACACTTTTGATGTATAAATTTTTATATACACGTACAAACTTTGT…	TCTCATTCAAACTTCCCTTCACATCAGCGTCAGTCATGCCTGTGACCCTCTTAAGACCGTTTGTGATACAGCATGTGTCCTCTCATTCAAACTTCCCTTCACATCAGCGTCAGTCATACCTCCCTGAAGAGGGTCTCAGTCAAAACACACGATCAACTCCACCTTTTGTTCCTTTTGTACACCTATACGTATGTATATATTTTGCATGCAAATGTATAAACTTTATATGTGTATATAAAGTTTATATATAAACATATGTATACCAAGTACGCACACATAAAGTGTATTTATGTATGAACTTTATATATATATATACACTTATATAACTTTTTTGTATGTATAAATTTATACGAATACACTTTTGATGTATAAATTTTTATATACACGTACAAACTTTGT…
429	Chr01	12936615	12172254	ATATATATATATATATATATATATATATATA	A	30	GTAAGGAAAATCTTTATTTTCTAAAGTCCAAAAATGTCGTTGTATGTGTCCTATATATGGCTGCAATTTTATCGGAGTTGTCACGCGATCCAGTATAGCGTTGCTTGTATTTTTAAGTAACTAATCATAAAATTTATTTATATTTTAGTATATCGTAATGTCTACATGGATTTTAATGTTGCTTCTGCATGTGTACGAAGAATGAACGTGTTTGTAGCCTATTAATGTTCATATATATATATATATATATATATATATATATATATATATATATAAATATAATTATATGGAAATGGATACATGCAAATCATGCAGGGATAAATAAATGGAAAGATGGCACAAACCAGCTATTGAATATCTTTTATCGGGTTAAACCCGCTAACAGATTCAAACGTTGTG…	CTCTCAAGTGGGCAGGCGTTGCTTATGTAAGGAAAATCTTTATTTTCTAAAGTCCAAAAATGTCGTTGTATGTGTCCTATATATGGCTGCAATTTTATCGGAGTTGTCACGCGATCCAGTATAGCGTTGCTTGTATTTTTAAGTAACTAATCATAAAATTTATTTATATTTTAGTATATCGTAATGTCTACATGGATTTTAAGGTTGCTTCTGCATGTGTACGAAGAATGAACGTGTTTGTAGCCTATTAATGTTCATATATATATATATATAAATATAAAATTATATGGAAATGGATACATGCAAATCATGCAGGGATAAATAAATGGAAAGATGGCACAAACCAGCTATTGAATATCTTTTATCGGGTTAAACCCGCTAACAGATTCAAACGTTGTG…
432	Chr01	13196896	12294027	G	GCGCCGCCGCCGCCAGCGACGCACGTGCACGTCGC	34	AAAAAAAATCAAGCATTCCGGAGAAATCACCAATCTCCCATGGCCACCGGTGACTCGTTAGCTCCGCCCTGTCGCCTCCCCACTCGAGAGAAATTTGACATTGTGCCATTGTCAAGAATGGGTTTCACCTAAATGCTACTCCGTGAAATGCATTTGATAAAATGCCACTTTCAACTCCTGGCTACATGCTAGAATATTTTTCGGGACCGAATTACCCCCAACCCAACTTCTTCCTCCTACTCGCCGGCGAGATCTGTCGTCTCCTCACCCACATCGACTAGCTATCCGACAACCGGCGACGGTTGGTAAACTCAACGGAGCCGCCGGTCGGGGACCTAGTGTACGTGCGCCGCGGGCGGCTATGGCGGCGGCGACGCGTGGGTGTGGTGGAAGGAGGGA…	GCCACCGGTGACTCATTAGCTCCGCCCTGTCGCCTCCCCACTCGAGAGAAATTTGACATTGTGCCATTGTCAAGAATGGGTTTCACCTAAATGCTACTCCGAAATGCCACTTTCAACTCCTGGCTACATGCTAGAATATTTTTCGGGACCGAATTACCCCCAACCCATCTTCTTCCTCCTACTCGCCGGCGAGATCTGTCGTCTCCTTACCCACATCGACTAGCTATCCGACAACCGGCGACGGTTGGTAAACTCAACGGAGCCGCCGGTCGGGGACCTAGTGTACGTGCGCCGCGGGCGGCTATGGCGGCGGCGACGCGTGGGTGTGGTGGAAGGAGGGAAGCTGGGAGCTGCTTGGCATGTGTAGTTGGTTGCCTTCTTCCCTATCTGCGCCGCCGC…
433	Chr01	13295502	12400985	CCAGTCCACAAGCTATTCTATTTGTTGTAATAGATACTCTCT	C	41	TAAAGTCCCAAACGATGGTATTATTGCCTTTGTGTTTTAAAAGGACGCGACTGGGGTGCATGGTCGTGCGTTAGGCTAAACACCCGTTCGGACATTCTTAGATTTTCCAATTAGTAATTAGGCTATGATGTGCTACAAAGGCATCTGGATCGTCTACATTACTGCAGATGAGTACGGTTCATATGAGAGGGAACAGATCTCCTTCGTTCGCGATAGATCGGACTGTTAAAAATATCCTAAAGTCATAGTGCTGCGCTTCTCTATCTTTAGCAAGTAAAGGCAGAGTAATGGTTTGCTTGGTTGCGCAGACGATAAGCTTATTCATTGGCGCATAACACAAAATATTTCCTTTTCACCCTGGGACAAAAAAAAAAAAAGTGCTCCTTTTGCATGGGTGTG…	TTTTAATCTAAAGTCCCAAACGATGGTATTATTGCCTTTGTGTTTTAAAAGGACGCGACTGGGGTGCATGGTCGTGCGTTAGGCTAAACACCCGTTCGGACATTCTTAGATTTTCCAATTAGTAATTAGGCTATGATGTGCTACAAAGGCATCTGGATCGTCTACATTACTGCAGATGAGTACGGTTCATACGAGACGGTTCATATGAGAGGGAACAGATCTCCTTCGTTCGCGATAGATCGGACTGTTAAAAATATCCTAAAGTCATAGTGCTGCGCTTCTCTATCTTTAGCAAGTAAAGGCAGAGTAATGGTTTGCTTGGTTGCGCAGACGATAAGCTTATTCATTGGCGCATAACACAAAATATTTCCTTTTCACCCTGGGACAAAAAAAAAAGTG…
434	Chr01	13336605	12442615	CTCTTACTCTCTTCTTTTTTTCTCAAATCACAAT	C	33	ATTAAATAAATAATAAAAATAATATAACTGAGACTCCATATCTAGTAGCTAGTACATTCTACATTTATTATTTCCCAACTATAAAACTTTTACAACATTAAAATGCGAAAAATGAGAGTCCAAAGGAAGTACAAATTGACATTGATTAACCTAATTAAATTTGATAAATCCACATACTATGTGCTGGAATTAATATCTCAGTTATACATTCATTGAGTTAGTGTTGGACTGGAAAGTTAGTTGACAACGGTATATGCAAAGCTAGCAATAAAAGAAAAATATATTCCCTTTAGATACAACAGCTGGAATAGCTCAGTTGGTTAGAGCGTGTGGCTGTTAACCACAAGGTCGGAGGTTCAAGCCCTCCTTCTAGCGCCTTATTTTTTTTATTTTCAATTT…	ATAATAAAAATAATATAACTGAGACTCCATATCTAGTAGCTAGTACATTCTACATTTATTATTTCCCAAATATAAAACTTTTACAACATTAAAATGCGAAAAATGAGAGTCCAAATGAAGTACAAATTGACATTGATTAACCTAATTAAATTTGATAAATCCACATACTATGTGCTGGAATTAATATCTCAGTTATACATTCATTGAGTTAGTGTTGGACTGGAAAGTTAGTTGACAACGGTATATGCAAAACTAGAAATAAAATAAAAATATATTCCCTTAAGGTACAACAGCTGGAATAGCTCAGTTGGTTAGAGCGTGTGGCTGTTAACCACAAGGTCGGAGGTTCAAGCCCTTCTTCTAGCGCCTTATTTTTTTTTATTTTCAATTTCTTACTCA…
435	Chr01	13363397	12469995	C	CCGATTATTCGGTGTACGACTCCAACTGGTTTACCTATACGTATTTCTCTA	50	ATGATTTAGGTGACATGCACAAAACGAGAGGATACCACTTCGAGGGATAAAAACACATCCTCGGTGAGGACTAGTGCTGAAGAGGAGCACTGAAGCGTTTCTTGTAAACCCGTCTCTAGGAATTTGTGTTACATTGCTATAGCTGAAGTGGACCTTCATGTTTATATGGGGCCTAAAAGAAGGGGGGCGTGTTGCCTATATGGCACATGGCCATCCACGGGCCTGGTTTCTTGCTTTTATCACAGCCGTTCATTTAGAAGCAACGGCTGGATGTGATCATGTGAGCGGGTCGTGCCCACGCTCGTCGATGCTCACCTGGCCGAAGGTATCAGCAGTTCAGCAGCAGATAGCTCTGGGTGGGCCCGCATGTCAGCAAGAAATAGACTTTCCATTGTGTAG…	CAACAGGACCAAATCAATGATCGCACAATATCCTCTTGAATTTGGGCCAGGCCTAGCATTGTTAATCTACCTAACGGCTATTGTCTATCAGCTGATGTTGTGTTACATTGCTATAGCTGAAGTGTACCTTCATGTTTATATGGGGCCTAAAAGAAGGGGGGCGTGTTGCCTATTTGGCACATGGCCATCCACGGGCCTGGTTTCTTGCTTTTATCACAGCCGTTCATTTAGAAGCAACGGCTGGATGTGATCATGTGAGCGGGTCGTGCCCACGCTCGTCGATGCTCACCTGGCCGAAGGTATCAGCAGTTCAGCAGCAGATAGCTCTGGGTGGGCCCGCATGTCAGCAAGAAATAGACTTTCCATTGTGTATTACCCAGTCAACGCTGAAAAAAAAGG…
436	Chr01	13382160	12493673	AGAAAATCTAATCATATATTTTTATTTAAATCGAT	A	34	TGTTACGTTCTGTCTCCGTCCCAAAATAAGCGTAATCATGAGTTTTCGTGTCCAACTTATTTAAATTTTTTTCTGATTAGTATTTTAATTATTATTTTTTTGACTGGAAGTATTTTAATTATTATTAGATTATAAAATATGAATAGTATTTTATGCGAGACTTATGTTTTTTTTTATTTTTTTTAAAAAAATTTAAATAAGACAGACAATTAAAGTTGGAGATAGGAACTCATTGCTGTGCTTATTTTGGGACATAGGGAGTATCTCTTATATCCATTAAATTTCCTAAAAACACTCTCAAACCGTCACACACGCTTCCTAAAAATACTCTTAAACTGTCATGTGGCAATAAGAAAATCTAATCATATATTTTTATTTAAATCGATTAAGAAAATCTAA…	CATATTTGCAACAGTGATCAACTCAAAAGCTTAAAAGTTTGTTACGTCCTGTCTCCGTCCCAAAATAAGCGTAATCATGAGATTTCGTGTCCAACTTATTTAAATTTTTTTCTGATTAGTATTTTAATTATTATTTTTTTGACTGGAAGTATTTTAATTATTATTAGATTATAAAATATGAATAGTATTTTATGCGAGACTTATGTTTTTTTTATTTTTTTAAAAAAAATTTAAATAAGACGGACAATTAAAGTTAGAGATAGGAACTTATTGCTGTGCTTATTTTGGGACATAGGGAGTATCTCTTATATCCATTAAATTTCCTAAAAACACTCTCAAACCGTCAAACGCGCTTCCTAAAAATACTCTCAAACTGTCATGTGGCAATAAGAAAATCTA…
437	Chr01	13470716	12522960	TTTTTTTATTTGAGGTTGTCTGGATGTCTGAA	T	31	AACGTGATAATCGGATACATGGGATACAAATTTTAGCTCGATTTTCGTTAGTGTGTTTTATGATGCGTTTTCTACCTTTCGACAGGATAAAATTAACAACCGATATCTATAACTACTCAATAGTATTGGTTTATTAAAAAACCCGATACCAATAGTCTTCATACGTGCTGAATTTTATAATAAACCGGCGCTAATAGACATCACATATGTACTGGTTCTTATAATAACCGGTATCTTCTAGTACGGCCTAATTGGTGCAGTTTTTATTATGGAATGGCACATATAGGCATCACAAATATACCGTTTCTTAATAAAAACGGCACCTATGAGTGGTAAACCGGTACATATGATTACATCGCTCCTATACATGTGTTTTTACCTAAAGTTTTCGTATCAAGT…	CGGATACATGGGATACAGATTTTAGCTCGATTTTTGTTAGTGTGTTTTATGATGCGTTTTCTACCTTTCGACATGATAAAATTAACAACCGATATCTATAACTACTCAATAGTATTGGTTTATTAAAAAAACCGATACCAATAGTCTCATTAAGTCATAGGTGCTGAATTTTATAATAAATCGGCGCTAATAGACATCACATATGTACTGGTTCTTATAATAGCTGGTGGTATCTTCTAGTACGGCCTCATTGGTGCAGTTTTTATTATGGAATGGCACATATAGACATCACAAATGTACCGTTTCTTAATAAAAACGGCACCTGTAAGTGGTAAACCGGTACCTATGATGACATCGCTCCTATACATGTGTTTTCACCTAAATTTTTTCTATCAACTC…
438	Chr01	13491854	12560026	T	TATATATATATATATATATATATATATATATATATATATATAT	42	CGGATGACGTACCAAAATACCGAAAAAAACATCTTCAATTTTTACAATATTAGAGATTATGTTTATTCCGAATTTTAGTTAGTTTTAAATTCCTATATGGACTCTATACTCTACTTCTAATATTCCTTAGTTTTAATTCCTAATTTCTATTATTTCTTAATTATATTTCTATATGGACTCTATACTCTTCTTCTAATATTTTTTATTTTTAATTCTGAATATCAGTTATTTATAAATTGTATTTCTATATGGACTTTAGTCTCCTCTTCCAATATTCCTTATTTTTTAATTCCGAATTTCAACTATTTCTAAATTGTATTTCTATATGGACTCTGTTTTTCTTTTTCTCCGATTAATATGAGAATTTCTAAGCCATGAGAGCGAACGTGGAGGCTCCTT…	CGGATGACGTACCAAAATACAAAAAAAAACATCTTCAATTTTTACAATATTAGAGATTATGTTTATTCCGAATTTTAGTTAGTTTTAAATTCCTATATGGACTCTATACTCTACTTCTAATATTCCTTAGTTTTAATTCCTAATTTCTATTATTTCTTAATTATATTTCTATATGGACTCTATATTCTTCTTCTAATATTTTTTATTTTTAATTCTGAATATCAGTTATTTATAAATTGTATTTCTATATGGACTTTAGTCTCCTCTTCCAATATTCCTTATTTTTTAATTCCGAATTTCAACTATTTCTAAATTGTATTTCTATATGGACTCTGTTTTTCTTTTTCTCCGATTAATATGAGAATTTCTAAGCCATGAGAGCGAACGTGGAGGCTCCTT…
439	Chr01	13574594	12651552	GATGAATTAGCGTATGATTAATTAAGTATCCGCTTTAGA	G	38	GGGTTAACACCGTTTTTCGTGCGACCCGAACTCAGCCATAACTTTGGATGGTATGTGGACACCAAACCAAAGCAAGTAGATTGATTTAATTCGAGTATTTGGATGATGGGCTGTGGATTCAGGTAGGGCTTCGTTTTCGGCACTGTTCCCTCGAGTCTGGGGGCCCATGATACTATTCGTCGGCATCGCCGGTGATACACTGTGTTGGGGCTGCGAACGGGACCGCTCGAACCGGCCGATGTTGGTTCCTGTCGTCGTCGTCGTCGTGGTGATGCGTGATGCCAATAGAAACACATGCTCGATGGCCGATCGATCTTCAACTGTCCGGAGTTAGTAAACCAATCAAATGAGACTTTGATCACTCCGCAGCTATAGGATCTCACTGTCACGTGTCAGCTC…	GGTTAACAACGTTTTTCGTGCGACCCGAACTCAGCCATAACTTTGGATGGTATGTGGACACCAAACCAAAGCAAGTAGATTGATTTAATTCGAGTATTTGGATGATGGGTTGTGGATTCAGGTAGGGCTTCGTTTTCGGCACTGTTCCCTCGAGTCTGGGGGCCCATGATACTATTCGTCGGCATCGCCGGCGATACACTGTGTTGGGGCTGCGAACGGGACCGCTCGAACCGGCCGATGTTGGTTCCTGTCGTCGTCGTCGTCGTGGTGATGCGTGATGCCAATAGAAACACATGCTCGATGGCCGATCGATCTTCAACTGTCCGGAGTTAATAAACCAATCAAATGAGACTTTGATCACTCCGCAGCTATAGGATCTCACTGTCACGTGTCAGCTCC…
442	Chr01	13624056	12699542	T	TGAGTAGTAATGCTTGTGCGTCACTCTTAGATTATTTATTATGAGGA	46	GTATCTACTTTATATTATGTTCATGTTATACTGAATATACTGCTAGCTTATCTGGGAGATGCTTTGGTGCGGGTATAGTGTTTGCTTATGCAATTGCTCTATGTCAAGACGATGATATTATAGTAGTATCTGGTAGTTTAGACGTGTTGTCTAGATTACGGGATATCTTTATTTGGGGTTATATATTGCGGATGAGAGGTGGGCCGCTGATGGTGATAGCTCAGTACGGGTATTCGTCCGCGCCTATATATAATCCTAAGTTAATTTCCTGGGGAGGGTACTCCTCCGTATTTAGCCCCGGTTGGATGGTCATGACGGGGGTCGTAAGGAACTCGGCAGTCAGGGGTGGCTTCTCGAAGTTCCAGGAGGGCATCGGATAGAGGGTATTAGCTAGTATAT…	TATCTACTTTATATTATGTTCATGTTATACTGAATATACTGCTAGCTTATCTGGGAGATGCTTTGGTGCGGGTATAGTGTTTGCTTATGCAATTGCTCTATGTCAAGATGATGATATTATAGTAGTATCTGGTAGTTTAGACGTGTTGTCTAGATTACGGGATATCTTTATTTGGGGTTATATATTGCGGATGAGAGGTGGGCCGCTGATGGTGATAGCTCAGTACGGGTATTCCTCCGCGCCTATATATAATCCTAAGTTAATTTCCTAGGGAGGGTACTCCTCCGTGTTTAGCCCCGGTTGGATGGTAATGACGGGCTGTAGTAAGGAACTCGGCAGTCAGGGGTGGCTTCTCGAAGTTCCAGGAGGGCATTGGATAGAGGGTATTAGCTAGTATAT…
444	Chr01	13637747	12703070	G	GAGCATGCACTCATTAGTGCTAACCAGCGACCATTCTTT	38	ATGTAAAAAAATATTGTAATATATATAATTTTGGCAACACTTTTCAGTTATGCAATATATCTAGATTTCTCAGTACCAAATACTTGATAATCTTTCCAATATATGTATATAATAATCTTCCTGCAAGAATTTCTATTAAATAATAAAAAAGTAATTTATGGGCAAATTATTATTGTATCAAATTTCAAAATTTTCTACCTATCTTCATAGGCGGATGTTTTTTTTTTGCAGTCGGCTTCTACATATTTTCGCAGGCGGATCAATCTAGCTAACGTCCACCTGTGAAAATAATCTTCGCAGGCGGACGGACGCCCCGCCTGCGAAGATCGATGATCTTCACCGTCGTTTGCTTACAAGCAGAGGTCGGCCCTGCCTGCGAAAACCGATTTCCACTGCCGG…	TAGATTTCTCAGTACCAAATGCTTGATAATCTTCCAATATATGTATATAATAATCTTCCTGCAAGAATTTCTATTAAATAATAAAAAAGTAATTTATGGGAAAATTATTATTGTATCAAATTTCAAAATTTTCTACCTATCTTCATAGGCGGATGTTTTTTTTGCAGGCGGCTTCTACATATTTTCGCAGGCGGATCAATCTAGCTAACATCCACCTGCGAAAATAATCGCAAACGACAGTGAAGATCATCGATCTTCACAGGCGGGGCGTTCGTCCGCCTACGAAAATTATCTTCGCAGGCGGACGAACGCCCCGCCTGCGAAGATCGATGATCTTCACCGTCGTTTGCTTATAGGCAGAGGTCGGCCCCGCCTACGAAAACCGATTTCCACTGCCGG…
445	Chr01	13642351	12707681	TTCTTGTTTTCATTGTTCGACTTACGAAACT	T	30	CTATGTCGAGATTTATGGTTACAGAATGTGTTAAATCGGTTCAGTTTAGTTACATTATTTTATGATAAATTAAATTCTATCCTATATTGCAATATTTTGGAACGGAGGCAGTAGCAAATTTTATTTAATTTCCAAGGATTGATATTGTTGCAAATTTTGTTTAATTTGCAAGGATTCATATTGTGTGCATATAATTACATAAAAGCAGCAAACATTCGTAACTACGAACTGAGAACTAATGATCTCTAACCTCTTTTCAAAATGATGACTATTCACTAATGGTTCATACTATATAGTTCCCAACACAATCACAATCCGATGGACTTCGAACCGTTACACATTATAAAAACTCAAATGATTTATTAGAAACCTTTAAGGTTATATCTGTGACGGTCATTA…	CTATGTCGAGATTTATGGTTATAGAATGTGTTAAATCGGTTCAGTTTAGCTACATTATTTTCTGATAAATTAAATTCTATCCTAGATTGCAATATTTTGGAACGGAGGCGGTAGCAAATTTTATTTAATTTCCAAGGATTGATATTGTTGCAAATTTTGTTTAATTTGCAAGGATTCATATTGTGTGCATATAATTACATAAAAGCAGCAAACATTCGTAACTACGAACTGAGAACTAATGATCTCTAACCTCTTTTCAAAATGATGACTATTCACTAATGGTTCGTACTATATATTTCCCAACACAATCACAATCCGATGGACTTCGAACCGTTACACATTTTAAAAACTCAAATGATTTATTAGAAACCTTTAAGGTTATATCTGTGACGGTCATTA…
446	Chr01	13778622	13153338	A	AATTTGTGGCTGTTCCACGGGTTACCAGAAGCGAGTACCACGA	42	TGGTTAAACCGTTAAAGGACCCGTAAATGTCTGGATTCACAGCTGAAGAGGGACAAAACAGACATTACTGTTAACATATTGTCAGTTCAAGGCGTAAAATACCACAAGTTAAAGATAACTCGAATTCCCTGTTTATTCTCCCTTTTCATTAGTTACAATCATTACCATATTGCTCAACATATATGAACCATTATTTTATTTACACCAATGAACTAACCGTAGATCAAAAGGCATAGCCAAAAATCAGACTGGTATGGCAGTACCTGCCTCAAAACAAAAGTATCATTCAGCAAATAATATTAGGACAACCACAATTCTTCAATCATCCTTTTCAATCATTGTAAGCATGCCTAAATAACAATATCTGGAATGGACATTATGGCAAACTACTATGTATAA…	TGGTTAAACCGTTAAAGGACCCGTAAATGTCTGGATTCACAGCTGAAGAGGGACAAAACAGACATTACTGTTAACATATTGTCAGTTCAAGGCGTAAAATACCACAAGTTAAAGATAACTCGAATTCCCTGTTTATTCTCCCTTTTCATTAGTTACAATCATTACCATATTGCTCAACATATATGAACCATTATTTTATTTACACCAATGAACTAACCGTAGATCAAAAGGCATAGCCAAAAATCAGACTGGTATGGCAGTACCTGCCTCAAAACAAAAGTATCATTCAGCAAATAATATTAGGACAACCACAATTCTTCCATCATCCTTTTCAATCATTGTAAGCATGCCTAAATAACAATATCTGCAATGGACATTATGGCAAACTACTATGTATAA…
447	Chr01	13787632	13165716	A	ATATGCGTGACTCATTTATTGTCGTCATGTGTT	32	ACATACAAAAGCAATTAAATGTGTAGTAACTGAAAAGGTGGTGAGTCATGGGATAGAGGATATGTGGCACACAAACTATATAGTAGCATACAAAATTAATAAAGTATTAACATACAAAGCTTGTTAGCTATCTGCTAACATATAAGAGTAATAAAGTAGCAAGTACGTGGAGTATAAGTTATATAGCTAGGACCACAATAAACATTACATGATCTATACATGGCAATGCATGTGAACCATGCACTTACTGCAAGCGGCAATCCAGAGTATATGCGTGGACAACCTTGGTATTAGGTAGCTAATTACCAAAATAAGATAGCTGCTTGCGTTACACAATTTACAAAAGACATGCTAGAATTTAAAGTAAAATACAAAGAGGTCTAGCAGGAAAGGAGCCGA…	ACATACAAAAGCAATTAAATGTGTAGTAACTGAAAAGGTGGTAAGTCATGGGATAGAGGATATGTGGCACACAAACTATATAGTAGCATACAAAATTAATAAAGTATTAACATACAAAGCTTGTTAGCTATCTGCTAACATACAAGAGTAATAAAGTAGTAAGTACGTGGAGTATAAGTTATATAGCTAGGACCACAACAAACATCACATGATCTATACATGGCAATGCATGTGAACCATGCACTTACTGCAAGCAGCAATCCAGAGTATATGCGTGGACAACCTCGGTATTAGGTAGCTAATTACCAAAATAAGATAGCTGCTTGCGTTACACAATTTACAAAAGACATGCTAGAATTTAAAGTAAAATACAAAGAGGTCTAACAAGAAAGGAGCCGA…
448	Chr01	13804141	13184383	TCTAAACACAGTGAAATACTGAAATGTCTAATTTTTCTTCT	T	40	TGATAGACACCTTCTGAGATGAAGGGTGAGGCAAAGCGGGCTGCTAGGCCAGTATATCTTTGAACCATTTCGATAATTTCACTAGCAGATTTGTCATTACTACTGTTTCCTTCAGTTTCATTATCTTCAAGATCAAATGGCTCCGATGGATAGTGTGCAGCCCAGACATCCCGACAGTGGTCAGCGGCATATTCTTCATTATCAGCATCAAGGATCGACGGACGGTTGATGAGGCGTCCAAACCTTGATGCACAGTAAGCAGCATAGCTCTCCTGGGGAACAGGAGAAAACTTGAGATGGCGCATTTCATGTGAAAGTTTCATAAGCCACAATCACAGTATAAGTGATATATATGAATTTCCAAAATTGTGGGACTTTTTGTACAGAAATTATGTACAG…	AGCAGCAACATGATAGACACCTTCTGAGATGAAGGGTGAGGCAAAGCGGGCTGCTAGGCCAGTATATCTTTGAACCATTTCGATAATTTCATCAGCAGATTTGTCATTACTACTGTTTCCTTCAGTTTCATTATCTTCGAGATCAAATGGCTCCGATGGATAGCGTGCAACCCAGACCTCCTGACAGTGGTCAGCGGCATATTCTTCATTATCAGCATCAAGGATCGACGGACGGTTGATGAGGCGTCCAAACCTTGATGCACAGTAAGCAGCATAGCTCTCCTGGGGAACAAGAGAAAACTTGAGATGGCACATTTCATGCGAAAGTTTCATGAGCCACAATCACAGTACAAGTGGTATATCTGAATTTCCAAAATTGTGGGACTTTTTATACAGAAA…
449	Chr01	13807591	13189480	T	TACTAAATTTTACACTATAAATTTTGGTACCTCAA	34	TATAGAGATAAGATATATTCTGGAGATAGAATCCTAGAAATAAATCTACTCTTACTTGTATTGTACTCTAAGTCTATCTCCTATGTACTCCTATATATACTCCATGATAGAGTCGATCTAATAGATAAGAAAACAATAAAATACAACAAATAGATTTTTCCACATAGTATCGGAGCCGAAGACCAACATTGTTTGATCCGTTTCTAAGTTACGAGGCTTCCGTTTCGTGTTAGAATAAGCCTGGTAGCTTGCAAGATGGGGCACACATTGAGGCCCACCAAAGATCCCCTTACCAATAACGCGGTGACTCTTGGAAGGAACAAGGAAGGGAACAGTAAAGTCGGAACATGGAACCGCACCTGAGAAAATTTTAGTCAAATTTGACTAAAATTTCTGAAA…	TCCAATCGCCAGCCGCCACCCCTGCCACCTCTAGCTTGGATAAGGTAGCCTCCACTTCTTCGATCGACGCCTGGTCGATGCAAAGCGCTCCCTTAAGAAGGTCGAATACTTGTCGTGTCGAAACTATCCACACGGGCCAGGCTTCATTCACTTGGTGTCAAGACTCAAGAGCGCAGTTAGGGTGTGCTCCGGCGAGGAAAGCTACGAGGCTTCCGTACCGTTTTGTGTTAGAATAAAGCCTGGTAGCTTGCAAGATGGGGCACACATTGAGGCCCACCAAAGATCCCCTTACCAATAACGCGGTGACTCTTGGAAGGAACAGGGAAGGGAACAGCAAAATCGGAACATGGAACCGCATCCGAGCAAATTTTAGTCAAATTTGACTAAAATATGTGAAAA…
450	Chr01	13836268	13218573	AGCCCCGGTTGGTATTACCAACCGGGACTAAAGTTACTATCTTTA	A	44	ACCAAATAATTCTTAAAAACTATTTGTAAAGTTTTAAACTAATTTTAATGTGTTTTACTTCTTTTAATTTTCATTTTAGTTTGTTTTCTATTATTTAAGATTAACTTTCACTAGAGTTTTCCTTCTCAACTATTTTATAAAACCTTGTTTAGCAAATGAACTAAATTTCTATATATTCTTTCTTCCCCACACACATTTTCTCTCTCATCAACTTACAACTAAATTTTGGAGACAAAAAAAGTGTGCAAAACATATGTGCAAATGTAGTATGACAAAAAAAAACATTGGAGGATGAAGTTGCAAACCTTTTAGGCACCTCCGATTTGTATGTAATCACCAAAATAAATTCAATAGAAATTTTGGCATGACCTTCCCTCTTTTTTGAAGAAATTTTGAAGC…	CACCAAATAATTCTTAAAAACTATTTGTAAAGTTTTAAACTAATTTTAATGTGTTTTACTTCTTTTAATTTTCATTTTAGTTTGTTTTCTATTATTTAAGATTAACTTTCACTAGAGTTTTCCTTCTCAACTATTTTATAAAACCTTGTTTAGCAAATGAACTAAATTTCTATATATTCTTTCTTCCCCACACACATTTTCTCTCTCATCAACTTACAACTAAATTTTGGAGACAAAAAAAGTGTGCAAAACATATGTGCAAATGTAGTATGACAAAAAAAAAATTGGAGGATGAAGTTGCAAACCTTTTAGGCACCTCCGATTTGTATGTAATCACCAAAATAAATTCAATAGAAATTTTGGCATGACCTTCCCTCTTTTTTGAAGAAATTTTGAAGC…
453	Chr01	13929615	13310262	T	TGTAAAGGAGAGCAGGCTCACAAAGTACTTGGATAA	35	AGCTAATATACTCCCTCCGTAAAAAAAAAAAAGGCAACCTCGTACTAGGCCTCTTGAAATCTCTTATTTAATTACGCACCAATCTACATTAGTGAAAAGGGTATCCCATGATCCCACCAGGAAGAGCCACGTCATCAAATAAATATGAACCGTTAGATGCACGATTTGAATGAAGAGAACCGTTCGATTAAAAGAGAGAAAAATAAGTAGAAAAAAAGCAAATAGTGTCCTGGGATGTTCTAGACACTTCAAGCACATCCCATAAAATGTGTGGTAACAAAAATATGAGAATAAAAAAATTTCTTCAAAATTATCCTTATAAAATAATCACCAATGAGTATTCGATAGTAATTCTACTGTATCAACAATAACAAGTATCCGTGAAAATATGAATAGCTA…	TACTCCCTCCGTAAAAAAAAAAAAGGCAACCTTGTACTAGGCCTATTGAAACCTCTTATTTAATTATGCACCAATCTACATTAGTGAAAAGAGAATCCCATGATCCCACCAGGAAGAGCCACGTCATCAAATAAATATAAACCGAGAACCGTTCGATCAAAAGAGAGAAAAATAAGTAGAAAAAAAAAGCAAATAGTGTCATGGGATGTTCTAGACACTTCAAGCACATCCCATAAAATGTGTGGTAACAAAAATAATGAGAATAAAAAAATATCTTCAAAATTATCCTTATAAAATAATCACCAATGAGTATTCGATAGTAATTCTACTGTATCAACAATAACAAGTATCCGTGAAAATATGAATAGCTACGCAACCTAATACTATCGATTACTTCAC…
454	Chr01	13931742	13312430	ATAGGAAAAATTTGCTACAGGACATGTGAAATTTT	A	34	ACTACTTAGGTTAGACAACAGGTTGGATTAAATATAATTCGTGCGGATGCATCCAAACCATGCAGCTCGAAAAGGATGGTACGTCTTCCAGCCTACAATTAGACAAAATGCACGGTCAAACATGTAATAGTCTCCTACCTAATTGGTGCCATGTTTGGTTGAGCATATTAATTTTTAATTTCCTTTTTGTCTTGCAATAATTTTTTTTATTTCATTGTTTAAGCAGTGCCTACCTTCACATTTTTCATTTTTAACTAACTCAGCATCAGCTCTGACTACCAAGTTGTACGATGATCCAAACAATATAAAGTCAGTACAATAATCACAACCTGCATTTCAAGGCTAACTTTGTCTCCAAATTACTGCTTCTCAAATTTTCAACAACCTTTTGAAGGTCCA…	ATTAAACAACTTAGGTTAGACAACAGGTTGGATTAAATATAATTCGTGCGGATGCATCCAAAGCATTCAGCTCGAAAAGGATGGTACGTCTTCCAGCCTACAATTAGATAAAATGCACGGTCAAACATATAATAGTCTCCTACCAAAGCCATGTTTGGTTGAGCATATTAATTTTTAATTTCCTTTTTGTCTTGCAATAATTTTTTTATTTCATTGTTTAAGCAGTGCCTGTCTTCACATTTTTCATTTTTAACTAACTCAGCATGTAGCTCTGACTACCAAGTTGTACGATGATCCAAACAATATAAAGTCAGTACAATAATCACAACCTGCATTTCAAGGCTAACTTTGTCTCCAAATTACTGCTTCTCAAATTTTCAACAACCTTTTGAAGGTCCA…
455	Chr01	13933850	13314415	G	GCCGGGCGGCGCGAGGCAGTAGGAGAACGCCGTGGCGTTCATCTGCGCGACGAG	53	GAGCCGTCGCCGCCGCCCAGTCGCTCCGCCTCGGCGTGCGCACCGGGGACGTCGAACGGTGCCCAGATCCGGCTGTCCCTTCTCCGAGCAGCCTCCTCGCGCCAGTGCCGGAGACGACGGCAGCCGACGGGGCGGTGACGCCGTGATGCGAGTTCGACGACGCCTTCCCGTCGCTCCGGCAAGGCAGCCAGTGGCCCATGAGGCTCTCGGCGATGCGTATCCTCGGTCTTGGAACACGACGAGCAGCAGCGAGATGAACCCCAGCAGCATAAGTTCTACAGATCACACAGACAGGAAACATTCGGAAGAAAAATTGAATCAAATTTTAATTTTTTTCTGGCATTAGTGCCGGAGGCGCGGCGAACGGCAAGGAGTACGAGATTATCGAGTTCCCCGATC…	AGTCGCTCCGCCTCGGCGTGCGCACCGGGGACGTCGAATGGTGCCCAGATCCGACTGTTCCTTCTCCGAGCAGCCTCCTCGCGCCAGTGCCGGAGACGACGGCAGCCGACGGGGCGGTGACGCCGTGATGCGAGTTCGACGACGCCTTCCCGTCGCTCCGGCAAGGCAGCCAGTGGCCCATGAGGCTCTCGGCGATGCATATCCTCTGTATCAGGTCTTGGAACACGACGAGCAGCAGCGAGATGAACCCCAGCAGCATCAGTTCCACAGATCACACAGACAGGAGACATTCGGAAGAAAAATTGAATCAAATTAAAGAGTTCAGTTAATTTTTTTCTGGCATTAGTGCCGGCGGCGCGGCGAACGGCAAGGAGTACGAGATGATCGAGTTCCCCGATC…
456	Chr01	13945027	13327271	A	ATAACTAACCCAACCAGAGGGGGTGAATGGTTGGAGTACCCAAAAATCC	48	TCGATCTCTACGGTTCGTGCCTTCATTATATATTTGCGCAATTTTCCTTTATTTATCCTACGGAAAAGGTAATGAGTGAAAGTGAATACTGTTATCCAGAAGAAGCAACACACATTTTGGCTGGAAAAGTAAATGAATAAATTCTACTCCGGCCACTTGAATATATATTACAAAGCTTCTATGTTGGTCTAGAAATATGCAACAGAAACTCAAGGTACACTTTATGACAAAGTTAAAAATTTGAGATTTGCTCCTGTCCCAAAAAAAAAAAGTACCTCAAGGTACCAGTACCTCACGGTACCAAATCATTTCCGATCATTGGATCTAATTAACAATACCCGTCCTATCCAGCTAGATCCAATGATCGGAATCGATTTGGTACCGTGAGGTACCAGTACC…	TCGATCTCTACGGTTCGTGCCTTCATTATATATTTGCGCAATTTTCCTTTATTTATCCTACGGAAAAGGTAATGAGTGAAAGTGAATACTGTTATCCAGAAGAAGCAACACACATTTTGGCTGGAAAAGTAAATGAATAAAATCTACTCCGGCCACTTGAATATATATTACAAAGCTTCTATGTTGGTCTAGAAATATGCAACAGAAACTCAAGGTACACTTTATGACAAAGTTAAAAATTTGAGATTTGCTCCTGTCCAAAAAAAAAAAGTACCTCAAGGTACCAGTACCTCACGGTACCAAATCATTTCCGATCATTGGATCTAATTAACAATACCCGTCCTATCCAGCTAGATCCAATGATCGGAATCGATTTGGTACCGTGAGGTACCAGTACCT…
457	Chr01	13991843	13372206	G	GTACAGTGTAATTTGTAATTACACATGTAAG	30	ACTAGTAATATATGCTCGTGCGTTGTAACAGGAAGAAAATAAAATTACAAAAATTAAAGTTCAATTTTCATAATCTAAAACCTGTAGAAACAACCAGGTAACAGTCAATTTTTTATACACCAGCTCTAACATCAGTTAAGGTTTTATTACTTAGCATGGGTGTCAGTAAAGTCAATGCAATGTCCAAAATATTTTTTTGTTTTGCATGTGAAAATAATTGCTACTATTGTTTCATCTGGCTGACAATCTAATACTGTGGAAAATATCTATGCATGTTTTGATTAATGAGCGCCATGAAAAAGAACTAGCAGTAGCTATATTTACGGCGTCATATTTTTCAAAAAACATAGTCAGCATGTATTTACATTGTAATTTTATAAATTACATATAAATACATTG…	CTAGTAATATATGCTCGTGCGTTGTAACAGGAAGAAAATAAAATTACGAAAATTAAAGTTCAATTTTCATAATCTAAAACCTGTAGAAACAACCAGGTAACAGTCAATTTTTTATACACCAGCTCTAACATCAGTTAAGGTTTTATTACTTAGCATGGGTGTCAGTAAAGTCAATGCAATGTCCAAAATATTTTTTTGTTTTGCATGTGAAAATAATTGCTACTATTGTTTCATCTGGCTGACAATCTAATACTGTGGAAAATATCTATGCATGTTTTGATTAATGAGCGCCATGAAAAAGAAACTAGCAGTAGCTATATTTACGGCGTCATATTTTTCAAAAAACATAGTCAGCATGTATTTACATTGTAATTTTATAAATTACATATAAATACATTG…
458	Chr01	14020284	13400889	A	AGCCAATCTTTTATTACTGCTAAAACAGTATAGAAATTATTAGTATATTTTA	51	TAATTTTCATAGCATTTTTAGACCGCGTGCAACAAACAAATGAGGGCATATGGGCTTCATATCTTTTTTGGCAAAATTGGATTTGTTCCCTATTATTTATGTGCGTACCGTCCAAAGATATCCATAGGCAATGACCAAAGCTTTGTACGTTCAGATTCCAAGTTTGAGTTCAAACTCAAATACCTCAGAACGAACTTCACCTATATTCAGCATTCATTTCATCTCTACCGTTTCCTATAACATCCTATTAAAACTCCAAGCTTTCACCAAAATTTAAATTTGAAACCTTTTTTTCAAAGAAATTTGACCCGAAAGAACTAATTAAATTTAAAGTTTCTTTTTGGGTGGGAGAAATATATTCAAAACCTGCATAACTCGTACTTTTAAAATATAAGCATT…	ATAATTTTCATAGCATTTTTAGACCGCGTGCAACAAACAAATGAGGGCATATGGGCTTCATATCTTTTTTGGCAAAATTGGATTTGTTCCCTATTATTTATGTGCGTACCGTCCAAAGATATCCATAGGCAATGACCAAAGCTTTGTACGTTCAGATTCCAAGTTTGAGTTCAAACTCAAATACCTCAGAACGAACTTCACCTATATTCAGCATTCATTTCATCTCTACCGTTTCCTATAACATCCTATTAAAACTCCAAGCTTTCACCAAAATTTAAATTTGAAACCTTTTTTTCAAAGAAATTTGACCCGAAAGAACTAATTAAATTTAAAGTTTCTTTTTGGGTGGGAGAAATATATTCAAAACCTGCATAACTCGTACTTTAAAATATAAGCATT…
459	Chr01	14020911	13401569	GCCTGTAAGCCAACGATTATGAAGATCGCCGATCTTCGCAGGCGGGTCCA	G	49	CAAAATTTAAATTTTTAACTTTAAATTTGAAGATAATTTTAAAGTTTTTTATCGAAGTTTATTTTTCAGTATTTGCTTTTAGATCGCTAAGACCACGTATATAAAAGGTTAGTTCGTCGTTGCAGTTTGCTTTCCTGTGCTTACTGGAATGGCTTAGTTGGCGCTCAATGTTGAGGAAGTCCGCGGCACATCTCGCCACGGTGGCGCCCGAGATCGGTTGGCTTCGCCACGGCGCGCGTACGTGCATGGCAACGGATCGAGTTGGCGGTGCTCGCATGCTCCGTCTACGTGTTTATCCTGGCTTGGGGCGGCCCGTGTTTTTACGCAATACTAGGAAAAGCATTATCGCAAGCGATCAAAAAGGGTCTTCGCAGGCAGGGCGGCCGTCCGCCTGTAAGC…	CAAAATTTAAATTTTTAACTTTAAATTTGAAGATAATTTTAAAGTTTTTTATCGAAGTTTAAGTTTCAGTATTTGCTTTTAAATCGCTAAGATCACGTATATAAAAGGTTAGTTCGTCGTTGCAGTTTGCTTTCCTGTGCTTACTGGAATGGCTTAGTTGGCGCTCAATGTTGAGGAAGTCCGCGGCACATCTCGCCACGGTAGCGCCCGAGATCGGTTGGCTTCGCCACGGCGCGCGTACGTGCATGGCAACGGATCGAGTTGGCGGTGCTCGCATGCTCCGTCTACGTGTTTATCCTGGCTTGGGGCGGCCCGTGTTTTTACGCAATACTAGAAAAAGCATTATCGCAAGCGATCGAAAAGGGTCTTCGCAGGCGGGGCGGCCGTCCGCCTGTTAGC…
462	Chr01	14040089	13421456	TTATTAGTTACAAAGCCTGTGAATATATCACTATCCATAAAG	T	41	TCTGGTGTGATGCTTCTATGTGAGGTATGTATGCTGTACTCGCCCTCGTGATATTATATGTTGAAGACTTACTCCTGGAAGTTGTGCAGTCTCAGTTTGTTTTGGTTCATTGGTTGTGTCATTTACCTTCTTACATCTATTATTCATTCTCAGTTTCAAGAGTTTGGACTATTCGCTTCTCCTCCCTTCAATTTTAAGTTGTTTACTGATATTATTCTTTTTCTTATGTTGGTTTTAACTTACATTTCTCAGGTTGCACTTGGTGAAATGAATGAACTACTATATGGAGATTTTGGTGCCGATAACCTGCCAAATGGAAAACTAAGGTCAGTTTCTCACACAATTATTTCCAAGTACTTTTCATGGACTTGTGGCATCAACTTCTTGTTAGTTAATGGT…	TCTGGTGTGCTGCTTCTATGTGAGGTATGTATGCTGTACTCGCCCTCGTGATATTATATGTTGAAGACTTACTCCTGGAAGTTGTGCAGTCTCAGTTTGTTTTGGTTCATTGGTTGTGTTATTTACCTTCTTACATCTATTATTCATTCTCAGTTTCAAGAGTTTGGACTATTCACTTCTCCTCCCTTCAATTTTAAGTTGTTTACTGATATTATTATTTTTCTTATGTTGGTTTTAACTTACATTTCTCAGGTTGCACTTGGTGAAATGAATGAACTACTATATGGAGATTTTGGTGCCGATAACCTGCCAAATGGAAAACTAAGGTCAGTTTCTCACACAATTATTTCCAAGTACTTTTCATGGACTTGTGGCATCAACTTCTTGTTAGTTAATGGA…
466	Chr01	14150345	13508229	AATACCTTTTCCAGGACGCTAGTGTATTAATCCCCGTCACAGGAAAAGCCGG	A	51	TTTAGATAAATAATAACAATGGCGCTAGAATAAAGAGTTTCATAATTAGCTTACCACTAGAGTAAATGTTCTACACATTGATTTTAGCTCATCAGATCCTTGCACGGATCCAGCAACCTCAGGTCCTTGGATTGACGACGGCGATGGGGTCACGGCGGGAGAGCTTCGGCGTGGATCATGGGGTGAGGATCACCGATAGTGTGCCCCCGCCCTCCCAGGTCTGGTGGCAGCAGTTCCGGGTGGTGGGCCTTGGAGCGGTGGATCCGAATCTGGTGACGAAGGCAGCCGGGTCACGGCCCACCGCTGGGAGAGCTCTGGTGCGGGCTGCGGGTGAAGGATCCATCAATGGAGCTTGGGGGAGAGGGGCAAGCTGTGGCGAGGCTAGGTATGGATGGCAAA…	TTTAGATAAATAATAACAATGGCGCTAGAATAAAGAGTTTCATAATTAGCTTACCACTAGAGTAAATGTTCTATACATTGATTTTAGCTCATCAGATCCTTGCACGGATCCAGCAACCTCGGGTCCTTGGATTGACGACAGCGATGGGGTCACGGCGGGAGAGCTTCGGCGTGGATCATGGGGTGAGGATCACCGATAGTGTGCCCCCGCCCTCCCAGGTCTGGTGGTGGCAGTTCCGGGTGGTAGGCCTCGGAGCGGTGGATCCGGATCTGGTGACGAAGGCAGCCGGGTCACGGCCCACCGCTGGGAGAGCTCTGGTGCGGGCTGCGGGTGAAGGATCCATCAATGGAGCTTGGGGGAGAGGGGCAAGCTGTGGCGAGGCTAGGTATGGATGGCAAA…
467	Chr01	14175078	13529862	CCACCTTTGGTAATGCTGCCCTCAATCGTCAA	C	31	CCCTCCCACCCACGGTACCGCTTCAAGGCAGAGGTGCGGTACCATGAGGTACAGATGATTTTTGACCGTCCGATGAGGCCTGATCAACTGTCACGATTTGGTACTGCACAGCCTCAAGGACAGTAAAAATGCTCTTAACTCTCCATTTTATCAGCCATGATTGCGGCAGATCAATTAATCTGTAGAAACTTTATCTTGTGCACAGTTTTTGTTGAAACATTGGACAGATGCTTCAAGAATGTGTGTGAGCTTCACATTGTATTTAACTTCAACAAGGTAAAGCGATTTTCATGTTTTGATCCTTTTACTTTGAATATGCTCCATTGAGGCTTGGCTTGAAGAATATAAAAGGGTCAAGTAAATAAAGCATGCTTGGTCCTTTACAAGAGAGGACCAATA…	CCCTCCCACCCACGGTACCGCTTCAAGGCAGAGGTGCGGTACCATGAGGTACAGATGATTTTTGACCGTCCGATGAGGCCTGATCAACTGTCACGATTTGGTACTGCACAGCCTCAAGGACAGTAAAAATGCTCTTAACTCTCCGTTTTATCAGCCATGATTGCGGCAGATCAATTAATCTGTAGAAACTTTATCTTGTGCACAGTTTTTGTTGAAACATTGGACAGATGCTTCAAGAATGTGTGTGAGCTTCACATTGTATTTAACTTCAACAAGGTAAAGCGATTTTCATGTTTTGATCCTTTTACTTTGAATATGCTCCATTGAGGCTTGGCTTGAAGAATATAAAAGGGTCAAGTTAATAAAGCATGCTTGGTCCTTTACAAGAGAGGACCAATA…
468	Chr01	14247181	13573743	T	TTATATCCTTATGAACACACGAGCACTCTATCCTTATGAGCCAGCA	45	AAAATATGTGCAAACCTAAAAGGGGCATTTGGATAATTGCCCAATCTAAAAGTGGCAAATAGTTAAATTTCGGAGATAGGGCGCCCGGGAGCGTTGTCGCCATTTTCAGAGGAGGCATTTTGCAATCAGACCCTCAAAGAGTATGATTTATAATAGTCACATAAACAGATATATGTGAATCAACTTTTTGAATACCTAAAAATCAATGATAGCTATGAGAGTACAGGTGCAACATAAATATTTTAAGGCGCATAAAATTGACATTATTTGAAAAGTTTTATGTAAGAAAGAACGGCATGTGATCGAGTAGTGCATATGTTGCGCGCTGCACTCCAGTCCAGCGTGGCACCGGTCGGCTGCCTCAAGTGCTGGTCAGAGGTGAGAATCGAATCGTAGATG…	AAAAAAATATGTGCAAACCTAAAAGGGGCATTTGGATAATTGCCCAATCTAAAAGTGGCAAATAGTTAAATTTCGGAGATAGGGCACCCGGGAGCGTTGTCGCCATTTTCAGAGGCATTTTGCAATCAGACCCTCAAAGAGTATGATTTATAATAGTCACATAAACAGATATATGTGAATCAACTTTTTGAATACCTAAAAATCAATGATAGCTATGAGAGTACAGGTGCAACATAAATATTTTAAGGCGCATAAAATTGACATTATTTGAAAAGTTTTATGTAAGAAAGAACGGCATGTGATCGAGTAGTGCATATGTTGCGCGCAGCACTCCAGTCCAGCGTGGCACCGGTCGGCTGCCTCAAGTGCTGGTCAGAGGTGAGAATCGAATCTTAGATG…
469	Chr01	14253253	13579929	TGTGTGTGTGTGTGTGTGTGTGTGTGTGTGTGTGT	T	34	AACCCCGGGGACTGACAGGACGGCCCCACTCGTCATCGTGTCGCTCCCCACGGCGAGAACGCAACAAGCGTGTGTGCGCTTCGCCATATGAGGTCAGCTCAGGCCACGGCGCCCTCGCCTCGCTAGTTCTTGGACCTGCTGTTTCGCGTGCGTTTTAGCGAACTGCTAGAGAGAGATGGGGCGCGGCGGCGGCGAGGGGTCGGAGGAGAGGGAGAGGGAGAGGGAGTGGGAGGAGGCGGCGGAGGCGGTGGCGTACGACTCCTGCACCTGGCCGCCGCCGGTGGTGGCGGTGTGCGGCCCCGGGAACAGCGGCAAGTCCGCCTTCTCCCGCCTCCTCCTCAACACCCTCGTGGGGAGGTGAGTGAGACTTGACAGTGCCCGCGATTCTACTAGAATGGC…	AACCCCGGGGACTGACAGGACGGCCCCACTCGTCATCGTGTCGCTCCCCACGGCGAGAACGCAACAAGCGTGTGTGCGCTTCGCCATACAAGGTCAGCTCAGGCCACGGCGCCCTCGCCTCGCTAGTTCTTGGACCTGCTGTTTCGCGTGCGTTTTAGCGAACTGCTAGAGAGAGATGGGGCGCGGCGGCGGCGAGGGGTCGGAGGAGAGGGAGAGGGAGAGGGAGTGGGAGGAGGCGGCGGAGGCGGTGGCGTACGACTCCTGCACCTGGCCGCCGCCGGTGGTGGCGGTGTGCGGCCCCGGGAACAGCGGCAAGTCCGCCTTCTCCCGCCTCCTCCTCAACACCCTCGTGGGGAGGTGAGTGAGACTTGACAGTGCCCGCGATTCTACTAGAATGGC…
470	Chr01	14276311	13594712	CATCAGCAGCATCACGCAACATTCAACAACAATCAG	C	35	AAAAAATTTATGTGGTTTAACGCTAGTCAATAATAAAGGGGAGTTGGGGATTTGTCCCCATCACCTTATTTCTTATTTTGATTTACTTTTATCTTACCTTTTTATTACTATTAAACTTATGGTTGTGTGTCTTATGACAGAAGCTGGAGATGTAATCCATTTCCATTATCTAAAAAATATATAATTTTATCTCCTAGTAGCTAGTATGAGGTAAGAGGATTTTTTTAAAAAAATAACCAGCAGTTAAAATGTGCAAATTTTGTAAGTAAAAGTTGTTGTAATAGTAAGAAAGAACCGTACAAGAAAAAAAAACTTAGCGCATTAGGTATTGTCTAGCCCGATCCAATGACCACGATTTGGTATTGTCGGGTACTGTTTGACGGTAAAAATCCTCCTAGC…	AAAAAAAATTATGTGGTTTAACGTTAGTCAATAATAAAGGGGAGGTGGAGATTTATCCCATCACCTTATTTCTTATTTTGATTTACTTTTATCTTACCTTTTTATTACTATTAAACTTATGGTTGTATGTCTTATGACAGAAGCCGGAGATGTAATCCATTTCCATTATCTAAAAAATATATTAATTTTATCTCCTAGTAGCTAGTATGAGGTAAGAGGATTTTTTTAAAAATAACCAGCAGCTAAAATGTGCAAATTTTGTAAGTAAAAGTTGTTGTAATAGTAAGAGAACCGTACAAGAAAAAAAAACTTAGCGCATTATTAGGTATTGTCTAGCCCGATCCAATGACCACGATTTAGTATTTTCGGGTACTGTTTGACGGTAAAAATCCTCATAGC…
471	Chr01	14277931	13596306	A	AATCCGGATGGACTATAAAAAACCGTATGAAAAA	33	AGAAGATGGTGCCGTGCCCTTATGATGCCGGAGTTGATTCTTCCCCCATTAAATCCGGCCGAATCTTTCTCGATCTTCAAAAATTAATTTAGGGCTTTTGATCTACTCGATTTTCTCTTTCCATTTTTCCCAAAATCAGAGCGAACAAAACTCGGAATATAAAACGGTGATGAAACTCGCTGGCCGACCATCATCGGTGATGGTTAAATGGAGATTAAATCCAGCAAATTAAAGTCAAATTGAAGGTGGAAATCATGGAAAAAATGATGAGGGGAGTGGGGAATCAATTGGAGGAAGAAACGCATGGAGAGACATATCAACATGGCGACGGAGCTAGGATTCGGCTTGGCGAAGGAAAAAGATGGTGACGAAAAGAAAACCGGAAGCCCTTACCGCATG…	CAGAAGATGGTGCTGTGCCATTACGATGCCGGAGCTGATTCTTCCCCCATTAAATCCGGCCGAATCTTTCTCGATCTTCTAAAATTGGTTTAGGGCTTTTGATCTACTCGATTTTCTCTTTCCGTTTCCCCAAAATCGGAGCGAACAAAACTCGGGGATATAAAACGGTCGATGAAACTCGCTGGCCGACCATCATCGGCGATGGTTAAATGGAGATTAAATCCAGCAAATTAAAGTCAAATTTAAGGGGGAAATCATGGAAAAATGATGAGGGGAGTGGGGAATCAATTGGAGGAAGAAACACATGGAGAGACATATCAACGTGGCGATGGAGCTAGGATTCGGCTTGGCGAAGGAAAAAGATGGTAACGAAAAGAAAACCGGAAGCCCTTACCGTAT…
473	Chr01	14326139	13663560	A	ATCACTCTCTAATTTTATCTACTTGAATAATAAT	33	CTCCTTGCAGTTAATAATCGTATTTCTATTAGTGAGCTAGGACGGCTCTCTTCCTCCCTTCACAATCAATAACAACCAATCTCGTACTCCCTCCGCTTCATATTATAAGTTGTTTGATTTTTTTCCTAATTAAACTTTTTTTAAGTTTTATCAAATATATAGAAAAATTTAGCAATATCTATAACACCAAATTTGTTCAATTAAAACTAACATTTAATATATTTTAGTAATATGTTTGTTTTGCATTGAAAATATTGCTATATTTTTCTATAACCTTAATCAAACTTAAAAATGTTTGACTAATAAAAAAAGAGCGGTATAAAACGGATGGAGTATATACTTTCTTTGGATGAAAATTATACAGATTTGTGAAATTTTACACGATAGTTAAGCAAGTAT…	CTCCTTGCAGTTAATAATCATATTTCTATTAGTGAGCTAGGACATCTCTCTTCCTCCCTTCGCAATCAATTACAACCAATCTCATACTCCCTCCGCTTCATATTATAATGTTTGATTTTTTTTCCTGATTAAACTTCTTTTAAGTTTTATCAAATTTATAGAAAAATTTAGCAATATCTATAACGCCAAATTTATTCAATTAAAACTAACATTTAATATATTTTAGTAATATGTTTGTTTTGTATTGAAAATATTGCTATATTTTTCTATAACCTTAATCAAACTTAAAAATGTTTGACTAATAAAAAAAGAGCTGTATAAAACGGATGGAGTATATACTTTCTTTGGATGAAAATTATACAGATTTGTGAAATTTTACACGATAGTTAAGCAAGTACG…
474	Chr01	14334241	13671688	A	ATTCAGAGGGATCAGTTTGCGTGTCTATGCGAGCGTTGTG	39	ACTTGTCAACATGTATCCAATATATGTCTCCCGTCACATGTGCTATGCGCTCGCGACCTTCTTGGTCAACTCCAATAGTCGCCTAGCCCACGTTTGAGCCTCCTTCATCACGAACTCTGTCATCGCCATCGCCAATTGTTGTGGCAAGAGAGAGGGCAAGCGATGGAGCATGCTTCACTAGTCATGGGGCCGAGACCTTGAAACTAACCAAACCAAATTAGAAAAAGTTGATGCCATCAACTGCATGCATATGAGAGGGAGCCAAAGAGGTGTTGCAGTTTATGTTGGAACTTGAAAAGAAAGGAAATTGCATCCTATATTTAGGGATAGAGGGGGTAAGTTGTAAGCTTTTAATTATTATACCATTTGACTGCATCGAGATATGTACGAGAAAGGGGA…	ACTTGTCAACATGTATCCAATATATGTCTCCCGTCACATGTGCTATGCGCTCGCGACCTTCTTGGTCAACTCCAATAGTCGCCTAGCCCACGTTTGAGCCTCCTTCATCACGAACTCTATCATCGCCATCGCCAATTGTTGTGGCAAGAGAGAGGGCAAGCGATGGAGCATGCTTCACTAGTCATGGGGCCGAGACCTTGAAACTAACCAAACGAAATTAGAAAAAGTTGATGCCATCAACTGCATGCATATGAGAGGGAGCCAAAGAGGTGTTGCAGTTTATGTTGGAACTTGAAAAGAAAGGAAATTGCATCCTATATTTAGGCATAGAGGGGGTAAGTTATAAGCTTTTAATTATTATACCATTTGACTGCATCGAGATATGTACGAGAAAGGGGA…
476	Chr01	14379839	13708663	GCATACAGCCTGACCGTCCTACAAGCCAGATCGAGC	G	35	CAACCTAACGTAACACATACAATATTTATATTGCAACCGCGTAAAAAAAATTTGTACAATTAATAAATTAAGACAAAAAATGATATCAAAATAGTACCCATCTTTTTAAAGTAAAGGAATAATCTTTGCACCATATAGATGGATAGCTAGACCAGCTAACCCACCCTGTCCAATGGGTAGGTCTGTCCCTAGTGTGGTTGGAATCCTGGAAACTCAATGAGACGGTGATGTCGAGATGAAGCTGCACCTTCATCGCATTAGTTGCTAGAGGGACGTATCTCATGTGCCAAACGATGAAGAGCATGTCTCACTCAAACTAGAACTACCAAGTTGCGATTATTGGTAAGCAGCTAAAGTGAAATATAATTATCTGATCAATAGCGGAACAAATCTTATTTG…	CAACCTAACGTAACACATACAATATTTATATTGCAACCGCGTAAAAAAAATTTGTACAATTAATAAATTAAGACAAAAAATGATATCAAAATAGTACCCATCTTTTTAAAGTAAAGGAATAATCTTTGCATCATATAGATGGATAGCTAGACCAGCTGACCCACCATGTCCAATGGGTAGGTCTGTCCCTGGTGTGGATGGAATCCTGGAAACTCAATGAGACGGTGATGTCGAGATGAAGCTGCACCTTCATCGCATTAGTTGCTAGAGGGACGTATCTCATGTGCCAAACGATGAAGAGCATGTCTCACTCAAACTAGAACTACCAAGTTGCGATTATTGGTAAGCAGCTAAAGTGAAATATAATTATCTGATCAATAGCGGAACAAATCTTATTTG…
477	Chr01	14391732	13724251	T	TGCTCTTCTCTCTCCTTATTTATCTCCTTAAAATATATTTACA	42	CCTTTCTTTGTTTGAAGGAAACATCCAACATCGTCGTTCACTTTCATAGCTACACTCTCGAAATAAAAGATTTAAGATATCCATTTTGACGCAGGAACCCTTTTTCTATGTAAGACAAACTTCTTGTTCTATGTACTTGAGTCGTACTCCCTCAATTTTTATTTAGTTTATATGGACATTAGATAGTCATATAAAGGAAAAATGAGGGAGTCTCGAGACTGGGTGGCCATGGTTGGTATCATAGCTGACAGTGGCGGAGGCAGGGCCCAGCCAGCATGGGCAGCTGCCCGGGCTCCATGCATCGCAACACACATTCCTCCACAGCATAAGAGCAAGTTTAATAGTATAGCCAACTACTAGCTCTAATTCATCTATAGTCAACCTAATAGCTCATTCATA…	TGAAGGAAACATCCAACATCGTCGTTCACTTTCATAGCTACACTCTCGAAATAAAAGATTTAAGATATCCATTTTGACGAAGGGTTTGTACCAGGAACCCTTTTTCTATGTAAGACAAACTTCTTGTTCTATGTACTTGAGTCGTACTCCCTCAATTTTTATTTAGTTTATATGGACATTAGATAGTCATATAAAGGAAAAATGAGGGAGTCTCGAGACTGGGTGGCCATGGTTGGTATCGTAGCTGACAGTGGCGGAGGCAGGGCCCAGCCAGCACGGGCAGCTGCCCGGGCTCCATGCATCGCAACACACATTGCTCCACAGCATAAGAGCAAGTTTAATAGTATAGCCAACTACTAGCTCCAATTCATTTATAGTCAACCTAATAGCTCATTCATA…
478	Chr01	14401085	13733632	T	TATATATATATATATATATATATATATATATATATG	35	CTGACATCATCTCTTTATAAATATAAATATAAATATAGTATCCGATCATTTTTATTTCTACCTATATAAAAATATTTTTCTTTCTACTCCCTCCGTTTCACAGTATAAAACTTTCTAGCATTGTCCACATATATATAGATGTTAACGAATCTAAATACACATATGTCTAGATTTATTAACATCTAAATGAATATGGGCAATGCTAGAAAATCTTACATTGTGAAACGGAGGAAATAATATTTATGAGCCTCACTAAAGTAGATCACTAGATAGCTAAATTCTTAAAAATGAAATTTTTTTTACCGTATCGATCGGAGTCGTTTGCATAAAAATAATATTATTTCTTACCATTTTCTTTCGTAACACAAATAACGCAGGTTGATTGTCTATATTGGGCTT…	TCATCCCTTTATAAATATAAATATAAATATAGTATCCGATCATTTTTATTTCTACCTATATAAAAATATTTTTCTTTCTACTCTCTCCGTTTCACGGTATAAAACTTTCTAGCATTGCCCACATACATATAGATGTTAATGAATTTAAATACACATATGTCTAGATTTATTAACATCTAAATGAATATGAACAATGCTAGAAAATCTTACATTGTGAAACGGATGAAGTAATATTTATGAGCCTCACTAAAGTAGATCACTAGATAGCTAAATTCTTAAAAATGAAATTTTTTTTACCGTATCGATCGGAGTCGTTTGCATAAAAATAATATTATTTCTTACCATTTTCTTTCGTAACACAAATAACGCAGGTTGATTGTCTATATTGGGCTTCGGCAC…
479	Chr01	14461701	13815335	T	TTCTTATAGGCTTACCAATATACTCCCTCTG	30	CCTGCTGCAAACTGATCGATGAACTGAAGATAAATTCTGCAAAACTCTTTCAGTTCTACGACCATTTCTTCGACTGGGGTCTCAAGGATGAGATCGAGCGCCTCGTGTCAATCAGAAACCGGCAGGGGATCCACCCGGCGCGGGGGCGCTGTTGCTGGCTCTTGCCGAGTTGAAAAGGGTAGATGCTGCCAGAGATGGAAGCCACGAGAGGGACATTTACGAATGTGCCCATGGCCCGGGGTATTTAAGGCCAGCTTGTTTACTCCAGTAAAAGAAAAGTATCACCGATCACGACATATCGTTTAGAAAGTGTGTGAGTTAGGCATGGGCGAACCACATCCTTTACGACTAGGTCTCTCGATCTGCTAGACGAGAGATCAACCAACAAAAGCTACGATA…	TCCTGCTGCAAACTGATCGATGAACTGAAGATAAATTCTGCAAAACTCTTTCAGTTCTACGACCATTTCTTCGACTGGGGTCTCAAGGATGAGATCGAGCGCCTCGTGTCAATCAGAAACCGGCAGGGGATCCACCCGGCGTGGGGGCGCTGTTGCTGGCTCTTGCCGAGTTGAAAAGGGCAGATGCTGCCAGAGATGGAAGCCACGAGAGGGAAATTTACGAATGTGCCCATGGCCCGGCGTATTTAGGGCCAGCTTGTTTACTCAGTAAAAGAAAAGTATCACCGATCACAACATATCGTTTAGAAAGTGTGTGAGTTAGGCATGGGCGAACCACATCCTTTACGACTAGGTCTCTCGATCTGCTAGACGAGAGATCAACCAACAAAAGCTACGATA…
480	Chr01	14484389	13837891	TGCCATTCATGCGGGGGTTATTAATGCCGCCGATC	T	34	ATTGGGTTCACTTCAACCTCCACTTATGAGATGCCCTTGTTGAATTTGCAGCTTGATGGTAGTTAACCTTGTCCTTGCTGTCACACGAGTTCATCGTCGGACGAGAGATCATCAGTGCTCCTCTCGACAACGCGAACTCGCTTTCCTTTTTTGAGGGCCACCTGTTTCGCCAAAGCTTGTTTTTATGACCTAGCACTCCCCCAATGTATTGTGTATTGGGCACCATTGTAGTACTGGTTTGTCGCCTTGAAGAGCTGGGCGCTTTGGGGGTGGGTTCGCTTGTACTTCAATCTACGCCTTACGCTTTCTTTTCTTTTTGCGATTTTGTTTCTTTTTCTTGCTAGACTCCAGTGCGTCCTTCTTGGCCGACGACTGTTTCTGCTCGGCCACCTTGCCCTT…	CAACCTCCACTTATGAGATGCCCTTGTTGAATTTGCAGCTTGATGGTAGTTAACCTTGTCCTTGCTGTCACACGAGTTCATCGTCGGACGAGAGATCATCAGTGCTCCTCTCGACTACGCGAACTCGCTTTCCTTTTTTGAGGGCCACCTGCTTGTTTTTATGACCTAGCACTCCCCCAATGTATGTGTGCTGGTATTGTGTATTGGGCACCATTGTAGTACTGGTTTGTCGCCTTGAAGAGCTGGGCGCTTTGGGGGTGGGTTCGCTTGTTCTGCAACAAAGACCTCTATCTACGCCTTACGCTTTCCTTTCTTTTTGCGATTTTGTTTCTTTTTCTTGCTAGACTCCAGTGCGTCCTTCTTGGCCGACGACTGTTTCTGCTCGGCCACCTTGCCCTT…
481	Chr01	14606095	13935661	TTAGACAGTTAGTCCATGATTAGCCATTATATATATA	T	36	ACCTTGCCATGCCATAATACTAAAGCACGCGGCAAAAGCAGAACGGTCCGTCTCATCCCTCATCGTGAAGAGGCCGCACGGAGAGACATTTTCAGTTGAGATGGAGGAGGAATCACTGCCATTCCACCGAGCACCACCATTGGCAGTTTGGCACCGCACGCGCGCGTGAATCTCCTCCCGCACATCCACCCTGTATGCTGGCTCAGCCAAGTTCTCTTGCCCTCTGCTGCTACTGAACCTTACAGGGATTCTGACGGAAGACTGAAGAGTGATGGCCGCTGGCTCCCTTTGCCGCGCGGCGCACATGCCGTCACCGGTTGTGCAGCACACGGTGGCGAGGAGAAGAAGGCCTCCCTCAAGGCGATGGTTTTTCATGGGCCCACAGAGTCATAATTGGCA…	ACCTTGCCATGCCATAATACTAAAGCACGCGGCAAAAGCAGAACGGTCCGTCTCATCCCTCATCGTGAAGAGGCCGCACGGAGAGACATTTTCAGTTGAGATGGAGGAGGAATCACTGCCATTCCACCGAGCACCACCATTGGCAGTTTGGCACCGCACGCGCGCGTGAATCTCCTCCCGCACATCCACCCTGTATGCTGGCTCAGCCAAGTTCTCTTGCCCTCTGCTGCTACTGAACCTTACAGGGATTCTGACGGAAGACTGAAGAGTGATGGCCGCTGGCTCCCTTTGCCGCGCGGCGCACATGCCGTCACCGGTTGTGCAGCACACGGTGGCGAGGAGAAGAAGGCCTCCCTCAAGGCGATGGTTTTTCATGGGCCCACAGAGTCATAATTGGCA…
482	Chr01	14608336	13937878	T	TCGTCCATTTACTCCCAGCCTCCCACATATGCT	32	CCAAGACTACAAGTCTGTGGCGGCGTATAACTCTGCCCTACATAGGATCATTTCTCAGTTGCGTTTATGTGGCCTGAAGATCACTGACGCTGAGATGATCGAGAAAACCTTATCTACCTTTCATCCCAACAACATAGTGCTGCAACAGCAATACAGGAACTCAAAGTACCCGAAGTACTCTGATCTTATCTCAGTCCTGTTAGTTGCAGAAAGGCAGAATGAGGTTCTTCTAAGGAATCATTCTGCTCGACCCACTGGGTCTATGGCACTGCCTGAAGCACACGCTAATGTTAAAATATTAACAATCCAGATTTTTCCCATTTTCGTTCCTTCTCTCCAGTTTTTAGTAAAATACTTACCGTCTTTTTCTTTCCGAGTTTTCTGTTTTTCTAGTGTCTC…	CCAAGACTACAAGTCTGTGGCGGCGTATAACTCTGCCCTACATAGGATCATTTCTCAGTTGCGTTTATGTGGCCTGAAGATCACTGACGCTGAGATGATCGAGAAAATCTTATCTACCTTTCATCCCAACAACATAGTGCTGCAACAGCAATACAGGAACTCAAAGTACCCGAAGTACTCTGATCTTATCTCAGTCCTGTTAGTTGCAGAAAGGCAGAATGAGGTTCTTCTAAGGAATCATTCTGCTCGACCCACTGGGTCTATGGCAGTGCCTGAAGCACACGCCAATGTTAAAATATTAACAATCCAGATTTTTCCCATTTTCGTTCCTTCTCTCCAGTTTTTAGTAAAATACTTACCGTCTTTTTCTTTCCGAGTTTTCTGTTTTTCTAGTGTCTC…
483	Chr01	14639814	13975159	CCCCGCAAAAAAAAAAAAAAAAAAAAAAAAAA	C	31	CCTACCAAGAAAGAACTGCAGATCAATTGTAGATCAAATGGCATGCCGGATGCATAATCAACTCATTGCCACATGCACAGTGGCGCTTGTACAACGATAGCAGAAAGAAATGGTGCAAGTAGCTAGGAAGCACACGGTGTTTCCATCACCAGGTTGATTAGTGAATGGTTGAACTTGATACTTATCGATGCTGTCCCGGTTGATCTACATGTAAGCATCTCGGTGATTGATCACAGCATTCGGCAACAGTTAACCGAAATTGCGTGCACGCCTCGCATGGATTGATGAATGATGTGTGTATGGGTACGTCCAGATCCCATGTGCTGGTGTGTACTGCAGTGTGGCCACTCCTTGTCAGCAATTGTGTTCTTCAAACTAACCGATTATTAAGGTATCTTC…	CCTACCAAGAAAGAACTGCAGATCAATTGTAGATCAAATGGCATGCCGGATGCATAATCAACTCATTGCCACATGCACAGTGGCGCTTGTACAACGATAGCAGAAAGAAATGGTGCAAGTAGCTAGGAAGCACACGGTGTTTCCATCACCAGGTTGATTAATGAATGGTTGAACTTGATACTTATCGATGCTGTCCCGGTTGATCTACATGTAAGCATCTCGGTGATTGATCACAGCATTCGGCAACAGTTAACCGAAATTGCGTGCACGCCTCGCATGGATTGATGAATGATGTGTGTATGGGTACGTCCAGATCCCATGTGCTGGTGTGTACTGCAGTGTGGCCACTCCTTGTCAGCAATTGTGTTCTTCAAACTAACCGATTATTAAGGTATCTTC…
484	Chr01	14673872	14000473	C	CGATCTAATAATTTGATCCAATATACGACCTCAATCAAAT	39	ACTGCTTAATGGTATCTCTTTAAGAAAATCTATAAAATAGTTACTTGAAAAATTATATTTATCTATTTTTAAACTCCTTTATAGCTAATACTTAAATAATCATGTGCTAATGAGTCATCTTGGACCTTTCCTCCGGAACACACCATTAGCCTTAGATTACATTTAAAGTGGATTGTGGGTAACATAACGCTGACATGAGAAATGTAGCCAAAAGGCTCAAATAGTTCTTAACATCAGCTTCGGATTATACAAAATGAGCCAAGCAGACCAAGATCATCTATAGCCAAGTGTGGAACTATTCTATTCTTTTGTCTGACAATAAAGCAAGTGAGAGGAGCTTTATTGATGAACCGAGGTAGGTATTCCCATCCAGTTTTGGCCGTGTTGTTTTGTTCCCCA…	TATCTCTTTAAGAAAATCTATAAAATAGTTACTTGAAAAATTATATTTATCTATTTTTAAAATCGTTTATAGCTAATACTTAAATAATCATGTGCTAATGAGTCATCTTGGACCTTTCCTCCGGAACACACCATTAGCCTTAGATTAGATTTAAAGTGGATTGTGGGTAACATAACGCTGACATGAGAAATGTAGCCAAAAGGCTCAAATAGTTCTTAACATCAGCTTCGGATTATACAAAGATGAGCCAAGCAGACCAAGATCATCCATAGCCAATGTAGTGGAAGTGTGGAACTATTCTTTTGTCTGACAAGACAGCAAGTGAGAGGAGCTTTATTGATGAACCGAGGTAGGCATTCCCATCCAGTTTTGGCCGTGTTGTTTTGTTCCCCACCAAAA…
485	Chr01	14757026	14267021	G	GTGCATGTATAATATGACTCTAATAATTGAACTACTGAAAAT	41	TAGAAATTGTATCGAACCGAGACAGCTCCTGTCGCGAACTCTCATGTTTTCCTCCAAATAAAATTGGGTGAGCCATACCACGGAAACTTGTTCTCTTCTCTCTCAAGAACTCCTCGTACAATGGACTCAACTCGATCCCCATCAGTGCATGATAACCCACAAACAAGACAGGACCTTGGTCAGGAACACCAGTAAGGCCACGAACAATCTTCCCATTCTTCAGGGTAGACAGCATGACTGGGCTCAATGCAAGGTGAAACAATCTGCAGAAGTTTTAGTTCGCTAATTACTGATTCATTTATATGGCAAAATTACATGCAAAAGTAAAATAGAATTTTGAATTCTCATAGTGCGTTAACATACTTGTGATCTTCATCGAATGTTTTCTTGAACTCACTC…	TTGTATCGAACCGAGACAGCTCCTGGCGCGAACTCTCATGTTTTCCTCCAAATAAAATTGGGTGAGCCATACCACGGAAACTTGTTCTCTTCTCTCTCAAGAACTCCTCGTACAATGGACTCAACTCGATCCCCATCAGTGCATGATAACCCACAAACAAGACAGGACCTTGGTCAGGAACACCAGCAAGGCCACGAACAATCTTCCCATTCTTCAGGGTAGACAGCATGACTGGGCTCAATGCAAGGTGAAACAATCTGCACAAGTTTTAGTTCGCTAATTACTGATTCATTTATATGGCAAAATTACATGCAAAAGTAAATAGAATTTTGAATTTTGAATTCTCATAGTGCGTTAACATACTTGTGATCTTCATCGAATGTTTTCTTGAACTCACTC…
486	Chr01	14807344	14310849	ACCTCTCCCTGTGGTGGATACGTGGAGGAGAGGACAAGAACTCGCCGCGG	A	49	ATAAAAAAAGAAATGCAACTAATATTCATAATACCCAGAATACCCTTAGAAAACCCTATCCATCCACCCAACCCTATCCACATTTCTCTCTCTCCTTCCTCCTTCCTGCTCACTCGACTTGTGGCGGCGGCGCTGAGGGGGCGGCGGCGGCGACTGAGGGGGCGGAGGGAGGGAGTGGCGGCGGCGACGACTGAGGGGCGCGGAGGGAGGGAGCGGTGTCGGCTGAGGCGGCGCCGGCGCGGGATGAGGGAAGCAGCGGCGGCGGCGGCTGAGGGGTGTGGAGGGAGAAGATCCACGACGGCTGAGGGGCAACGGCGGCTGAGGCGGCACCGGCGCAGGATGAGGGAGGCGGCGCCAGCGCAGGCGTGCGGAAGAAGGGAGGAGGCGGCGGTGGCGGCA…	TAAAAAAAGAAATGCAACTAATATTCATAATACCCAGAATACCCTTAGAAAACCCTATCCATCCACCCAACCCTATCCACATTTCTCTCTCTCCTTCCTCCTTCCCGCTCACTCGACTTGTGGCGGCGGCGTTGAGGGGGCGGCGGCGGCGACTGAGGGGGCGGAGGGAGGGAGTGGCGGCGGCGACGACTGAGGGGCGCGGAGGGAGGGAGCGGTGTCGGCTGAGGCGGCGCCGGCGCGGGATGAGGGAAGCGGCGGCGGCGGCGGTCTGAGGGGCGTGGAGGGAGAAGATCCACGACGGCTGAGGGGCAACGGCGGCTGAGGCGGCACCGGCGCAGGATGAGGGAGGCGGCGCCAGCGCAGGCGCGCGGAAGAAGGGAGGAGGCGGCGGTGGCGGCA…
488	Chr01	15126026	14607483	GACTCTCCATATAGGACTATTATCACTAAATG	G	31	TGAAATTTCCAAAAATTTTGGGAAATTTTCAACTTTTTGTCCGAAATTATTTGAAAATTTTACCAATTTTTGACTGAATTTGAATACATTTTGATCAAATTCACAAAAGTTTGAAAAAAAATTAGGGTGCAAATTTTGCTTGCCGGAAGGGGGGGGGGGGCAAAATTACTAAAATTTCAAAAAACTTAAACCGAAATTGAAATCCCTGATCTACTCTAGCACAAACACATATATGCTTAATTAGGAAAACCATCTCCAAACTGGTAGGACGATTGGTTAATTAGGGACTTGGGGTATACCTCTTGGGATGTGGATCAAGAACCTATAACACAGCGTCTTCAAACTCGCATTAGTTCACTCTACACGCTGAGTGGACCCACATTCACATAATCACATAGC…	CTGAAATTTCCAAAAATTTTGGGAAATTTTCAACTTTTTGTCCGAAATTATTTGAAAATTTTACCAATTTTTGACTGAATTTGAATACATTTTGATCAAATTCACAAAAGTTTGAAAAAAAATTAGGGTGCAAATTTTGCTTGCCGGAAGGGGGGGGGGGCAAAATTACTAAAATTTCAAAAAACTTAAACCGAAATTGAAATCCCTGATCTACTCTAGCACAAACACATATATGCTTAATTAGGAAAACCATCTCCAAACTGGTAGGACGATTGGTTAATTAGGGACTTGGGGTATACCTCTTGGGATGTGGATCAAGAACCTATAACACAGCGTCTTCAAACTCGCATTAGTTCACTCTACACGCTGAGTGGACCCACATTCACATAATCACATAGC…
489	Chr01	15169516	14646156	A	ACTTGATGTGTCATCCACAAGATGGCCAATCACTCCTTGACGGACTG	46	AAACCGGATTAGAGCTATTACCTTACAAGGGATCTGAACTAGTATAATCCTTGTCTCTTTGTTTGCTTGACGTCAAATCGTGTAGATCCTCGTATCAACATACCCCAATACTCTCATCATCCGTTCTACAGGTATCCCCCGTCGATAGTGGAGTGCCAGGTAGGGGAACTTGGTGCACAAGGTTCTACCGAGATGATTTCAAGCTTCCCCGACGTCTGCATCAGCACTAGCTTCGGCCCAGGAGATCCAACCCAGACGTCGCTAGTGTGGACTCAAGTTGGATCCATCGTCTTTCCGGTCTACGCTGCAAAACCAATCTCGTATGCCCTAGTGTTTGTCGAGATTGAGAATGGTGCAGCAAAGAAAACGAGAAACGACATCACTTCAGCCGCACCTCCC…	ACCTTACAAGGGGCCTGAACCAGTATAATCCTTATCTCTTTGTTTGCTTAATGTTGAATCGTGTAGATCCTCGTATCAACATACCGCAATACCCTCATTATCTGGTCTACAGATACCCCCCGTCAACAGTAGCGTGCTAGGTAGGGGAACTTGGTGCACAAGGTTCTACCGAGATGATTTCAAGCTTCCCCGACGTCTGCGTCAGCACTAGCTTCGGCCCAAGAGATCCAACCCGGACGTCGCTGGTGTGACTCAAGTCGGATCTATCGTCTTTCCGGTCTACGCTGCAACACCAATCTTATATGCCTCAGTGTCTGTCGAGATCGAGAATGGCACAGCAAAGACAACGAGAAACGACATCACTTCGGCTGCTCCTCCCGTCCTGACAGAAAAGAGGGC…
490	Chr01	15283238	14708788	AGCACTAGTGTTACCACTGGACTGGAGCACTAGTGTGTGGTGTTTACC	A	47	TCAGGAGCAGATAAAATCATGTCGTAGAGGGCAGAAGAGCAGAGGCATCACGTGTGTACACGTACGTTGCGTTTGAGGTGTTCGGGGCTCTTGTGCTCCATGACCGTGAAGTCGACGTTGACGACCTCGTACTCGGCGCCGACCTCCTCCAGGCACAACAGCACCCTCGCCACGTTCGTCGATTGCGCCGGCCCAAACACCTTCACCGGCGTCATCTTCTCAGCTATCCGAGCTCACGGCCACTGGTCGGCTGCGCGAGTGAGCGTGCGCAAACAAGGAGGAGTCTTTAATTGGAGCTTAGCTGGTGTGTGTTGTACGTGCCTGGTGGTAGCTTTAGCATGCGGTGCGCGAGGCCGGCTTTTATAAGCTAGCGGTGATTTCTTGAGAGAAAAAATTGCA…	TCAGGAGCAGATAAAATCATGTCGTAGAGGGCAGAAGAGCAGAGGCATCACGTGTGTACACGTACGTTGCGTTTGAGGTGTTCGGGGCTCTTGTGCTCCATGACCGTGAAGTCGACGTTGACGACCTCGTACTCGGCGCCGACCTCCTCCAGGCACAACAGCACCCTCGCCACGTTCGTCGATTGCGCCGGCCCAAACACCTTCACCGGCGTCATCTTCTCAGCTATCCGAGCTCACGGCCACTGGTCGGCTGCGCGAGTGAGCGTGCGCAAACAAGGAGGAGTCTTTAATTGGAGCTTAGCTGGTGTGTGTTGTACGTGCCTGGTGGTAGCTTTAGCATGCGGTGCGCGAGGCCGGCTTTTATAAGCTAGCGGTGATTTCTTGAGAGAAAAAATTGCA…
491	Chr01	15346312	14748121	T	TAAATTATATATATAATTTTAGTGTATTTAGTAAATACACTA	41	ATATCTCATCCAATCAAAAGTTGTTATATTTTGGGATGGAGATGGTGCTTATTACTATGTATACATGAATTATGTCCTTGTGATTAAGACAGTGTGTATACCTTTGCGATACTGGATATGTTTTCCATATCCTTGAGTTTTCACTTAATTCTTTTCGTGTGACTAAGTTTCATGTCAAATTTTTGTTTTGCCCTTCTACATATGCTCATTATGTTAGTTGACTTCGAGAGTTCGAGTGGGTTATTAACATTTTAGAAGTGATGAGCTGATGATATTGTATCTCGCTTATAATCATAGGTGCATGCTAGCCTCTGTGAAATTAGAGGTATGTCCGTGCAAATTTAGCCGAGACACATGTACAATACGAAAAACAAGGATCTATCTCAAAATATGGCGACA…	TATATCTCATCCAATCAAAATTGTTATATTTTGGGATGCATATGGTACTTATTACTATGTATACATGAATTATGTCCTTGTGATTAAGACAGTGTGTATACCTTTGCGATACTGGATATGTTTTCCATATCCATGAGTTTTCACTTAATTCTTTTCGTGTGACTAAGTTTCATGTCAAATTTTTGTTTTGCCCTTCTACATATGCTCATTATGTTAGTTGACTTCGAGAGTTCGAGTGGGTTATTAACATTTTAGAAGTGATGAGCTGATGATATTGTATCTCGCTTATAATCATAGATGCATGCTAGCCTCTGTGAAATTAGAGGTATGTCCGTGCAAATTTAGCCGAGACACATATACAATACGAAAAACAAGGGCCTATCCCAAAATATGGCGACA…
492	Chr01	15355934	14754060	GACCTCCACCTCCGCCGCCAGCCGCCCGAGCA	G	31	GAGATATCTTGAGCTTGCTCGAGTGTGTGGAAGAACGAATGAAGTGACCCCTTCATATAGCCTTGGAATGACGGTTAAAACGGTTGGAATTGTTGGATTTACCCTGCAACCACCATTGAGAAGTCATCACAAGCGTACACGTGGAGGCCCAGGCTGATCCGGCGCTGCCAGGGTTCGGCACCTAGGTAGGCTCAGTAGGCCTCCACACTTCCTAGGTCACTGACAGGTGGGTCCCTATGACGGTTGCGACAGTTATGACAGTTTCCGAGACGGTTACACCTGACATGTGAGCCCATCTTATCCTTAAGCTTGCTTAAGGGTGAGTTTTCTTCATTTCTTCTCCATTTTATTTGCTCAATCGCTGCAATCAAATAAAATCCAAGTACAAGTGGAAATAGA…	GAGATATCTTGAGCTTGCTCGAGTATGTGGAAGAACGAATGAAGTGACCCCTTTATATAGCCTTGGAATGACGGTTAAAACAGTTGGAATTGTTGGATTTGCCCCGCAACCACCATTGAGAAGTCATCACAAGCGTACACGTGGAGGCCCAGGCTGATCCGGCGCTGCCAGGGTTTGGCACCTAGGTAGGCCCAGTAGGCCTCCACACTTCCCAAGTCACTGACAAGTGGGTCCCTATGACGGTTGCGATAGTTATGACGGTTTCCGGGACGATTACACCTGACATGTGAGCCCATCTTATCCCTAAGCTTGCTTAAGGATGAGTTTTCTTCATTTCTTCTCCATTTTATTTGCTCAATTGCTGCAATCAAATAAAATCCAAGTACAAGTGGAAATAGA…
495	Chr01	15435877	14814859	TCATCGACCTGCCCCTAGGGGGGCCGTTTTTGCAGGCGCCGCCACAAGCGGCC	T	52	CAAGTGATTACATGCAAAATTTGCCCATCAAAACATATATTTTGAAGCTAGATTTTGCAAAAACTAGCTAGAACAAACCTTGTCAAAATATTAAAAAAACTCCACTTTCCACCAACGAAATATAACAGAAATGGAGCCAAATGAAGGAGAGAGAGTTATTCACCTTTCGTATAGAGTTCAAGCAAAAATTTCGAGTTGAAAACCTCCCCCCTAATTGGTGCTTGCTTTAGGAGAGAGAGAGAGCTTCGTTTTCAAATGGTCGAGCTTGGGCCTGGAGGAGCATATATGGCCGATCATCGCATGCGGTCCCTTAAGCCAGCCGCATGCGAAGATCCATTACCGCATGCGATAATGGGCCTATTTTCACATGCGGCCGTCTTAAGCAGCCGCATGCCCTAA…	CCATCAAAACATATATTTTGAAGCTAGATTTTGCAAAAACTAGCTAGAACAAACCTTGTCAAAATATTAAAAAAACTCCACTTTCCACCAACGAAATATAACAAAAATGGAGCCAAATGAAGGAGGAGAGAGAGTTCTTCACCTTTCGTATAGAGTTCAAGCAAAAATTTCGAGTTGAAAACCTCCCCCCTAATTGGTGCTTGCTTTAGGAGAGAGAGAGTGCTTCGTTTTCAAATGTCGAGCTCGGGCCTGGAGGAGCATATATGGCCGATCATCGCATGCAGTCCCTTAAGCCAGCCGCATGCGAAGATCCATTATCGCATGCGGCTGTTAGGACAGCCGCATGCGATAATGGGCCTATTTTCACATGCGGCCGTCTTAAGCAGCCGCATGCCCTAA…
496	Chr01	15438228	14817159	GAATACGCTTCCCTCTCTTTCTTACTGTATCAT	G	32	ATTGGTTATCAACGCATAATCAAAGTCGTAAGATGAACATATAAGAGCTAATGTAAACAATTGTAAATAGGTGTCAAAATTAATTGCTATTAATTAGACATCTAATGGCTTGCTAGCAACATATTTAATTTCTCTCTACATGTATATAAACATGGACAAAGCTAAATGAATATTAACATATATCCCATACATATATATTATATGGTTAATATTCTAATTACATGTGGTAAGTCCATTAAAATTTCTTAAAATACCATAAGCTGTCACGTGGTGCTCAAATAAATTAGAGAAAATATTAGAAATTCTAAGAAAAAAAACAAAGTATGATTTTCACTTAAATCGATCGGTCCAATATTATAAACCATTGGATTAAATTGATCTTAGAACAAACTAAATACT…	AATTGGTTATCAACACATAATCAAAGTCGTAAGATGAATCTGTAAGAGCTACTGTAAACAATTGTAAATAGGTGTCAAAATTAATTGCTATTAATTAGACATCTAATGGCTTGCTAGCAACATATTTAGTTTCTCTCTACATGTATATAAACATGGACAAAGCTAAATGAATATTAACATATATCCCATACATATATATTATATGGTTAATATTCTAATTACACGTGGTAAGTCCATTAAAATTTCTTAAAATGCCATAAGCTGTCACGTGGTGCTCTAATAAATTAGAGAAAATATTAGAAATTCTAAGAAAAAAAGCAAAGTATGATTTTCACTTAAATCGATCGGTCCAATATTATAAACCATTGGATTAAATTGATCTTAGAACAAACTAAATAC…
497	Chr01	15450640	14830106	T	TCCATGTCATCGAACAGAAACTAATTAAAGCAAACC	35	TGATTTGCCTGTGGCAAAGCCGCTAGAAATTTGCAGGCCTGCATGCGACTCAGTCGCTAAATTTTAGTGGGAGATAGCGGTCGCGGGGCGAGCACGCCGCGTTAGAGCATGGTTAATTAATAGTATAGTCAGCCAGCTATAACAAACTCTATTTTATTTTACAGCTAATACTAAAGCCAATTAGCATAATAGATAGGCTCCTGTGTTGATTGTATCTTATTAACCAAATAATCAATTCCTCCATACGCATATTAATCAAAAGTGTGTTCTATTCTTGTGGCTATTTTATGGTGTGATATGAATATGAGTAGTTTGTCCATATAGTACTACGTATAAAAAGTCTTTGTCCTCTCGTCGTCTGAATTTTTCACCAACGAGCACTGTCCGTAGATGTACATG…	GTGGCAAAGCCGCTAGAAATTTGCAGGCCTGCATGCGACTCAGTCGCTAAATTTTAGTGGGAGATAGCGGTCGCGGGGCGAGCACGCCGCGTTAGAGCATGGTTAATTAATAGTATAGTCAGCCAGCTATAACAAACTCTATTTTATTTTACAGCTAATACTAAAGCCAATTAGCATAATAGATAGGCTCATGTGTCGATTGTATCTTATTAACCAAATAATCAATTCCTCCATACGCATATCAATATGTATGATCAATAGTGTGCTCTATTCTTGTGGCTATTTTATGGTGTGATATGAATATGAGTAGTTTGTCCATATAGTACTACGTATAAAAAGTCTTTGTCCTCTCGTCGTCTGAAATTTTTCGCCAACGAGCACTGTCCGTAGATGTACATG…
500	Chr01	15646865	14990743	TATCTATAGTGTTTGTGAAATTTACTCTAGAAAA	T	33	CTGTTAATTTTTTGATTCAAACTTCGTAGAGGGCCTCCTGCACTGTCTTGAAAAACTGAATCTCTGGGTGTAAGGGCATGATATATGAGTTCTGTTCAGTGTTAGACTGTTAGTAAACAGCCATCCACAAATATTCATAATTCTAGTAATAATAGATCCACTTTTGAGAAGTAATTAACCACTATATAAGAAAAGGAGTATGTGTAGAAAAATTCAGGCATTTTGGCACATTTATTGAAGACCTACTGATTTAAGTAACTGTTTCAAGAACGTAAAGATATAGTTACTCTTATGTTCCATAGAACTACAAGTTTTTAACTACTTGTTCAAACCACTTGCAGACACACAAAGGCCCTGTTCTATGACATGCAGCACACATTTTTGTTATTTGGCATGGAA…	TGTTTCTGTTAATTTTTTGATTCAAACTTCGTAGAGGGCCTCCTGCACTGTCTTGAAAAACTGAATCTCTGGGTGTAAGGGCATGATATATGAGTTCTGTTCAGTGTTAGACTGTTAGTAAACAGCCATCCACAAATATTCATAATTCTAGTAACAATAGATCCACTTTTGAGAAGTAATTGACCACTATATAAGGAGTATGTGTAGAAAAATTCAGGCATTTTGGCACATTTATTGAAGACCTACTGATTTAAGTAACTGTTTCAAGAACGTAAAGATATAGTTACTCTTTTGTTCCATAGAACTACAAGTTTTTAACTACTTGTTCAAACCACTTGCAGACACACAAAGGCCCTGTTCTATGACATGCAGCACACATTTTTGTTATTTGGCATGGAA…
502	Chr01	15674810	15017840	AAGTTAAGATGTAATAGGGGGAGTACCGGCCG	A	31	TTCACACTACGGGAACAGTTGTCTTTAATCAACATGCTTCAATTCAAATCCATGCAACCTTTCATATGGACGGTTTTCTTTTTCTTTTTACAAATTTTACTTTACTTGAGAAAGTAACTAAATGTATCAAGATTTTAAACTAAAAACTTTAATACCTTGAGATATTAGTAGATACCAAATTTTACAATTCGAAAATATGTTATCTTTTTTACCTTTACAAAGATGGTAAAATTATTTCCCTTTTTGCATTAAGAAATGTCAAAGTAGAATTTTTCTTGAGAAATGTCGTGAACTAGGTCACTAGGACAACTTGGAAAACATATTACAGGCTAATACTAGGCATATACAAATAAACAAAATAGGCCCTAGCTAGTTAAACAATTTTGATACTGCTGAAGT…	CTATTGCAATCAAGCGGTTGTTTTCACACTACGGGAACAATTGTCTTTAATCAACATGCTTCAATTCAAATCCATGCAACCTTTCGTATGGACGGTTTTCTTTTTCTTTTTACAAATTTTACTTTACTTGAGAAAGTAACTAAATGTATCAAGATTTTAAACTAAAAACTTTAATACCTTGAGATATTAGTAGATACCAAATTTTACGATTCGAAATGTGTTATCTTTTTTACCTTTACAAGGATGATAAAATTATTTCCCTTTTTGCATTAAGAAATGTCAAAGTAGAATTTTTCTTGAGAAATGTCGTGAACTAGGTCACTAGACAACTTGGAAAACATATTACAGGTTAATACAAGGCATATACAAATCTACAAAATATATAGGCCCTAGCTAGTT…
503	Chr01	15811215	15127235	A	AGAGAGAGAGAGAGAGAGAGAGAGAGAGAGAGG	32	CATTATTATGCATTCTCAGATCAATGACTCCTAACCCACCTTTTTCCTTAGGTTGACCGACTAAGCTCCGAAAAAACAGAGATTTTTTGGTTGAGTTGAAATCTGAACCTCTCCACAAGCAGTGTCTCCTAGATTTATCAATTGCATCTATAACTGGTTGTGGAATAGATAAAGAAAACATATAATATGTGGGTAGGGAAGAAAGGACTGAATTTACCAGAGTCAACCTGTCTCCATAAGAAAGAAATGTTGTAGTAGCAAATTATCTCCTCTCAATTCTATGAATCAAAGGTGCAAATTCCATCACTTTTGGTCTGGTAGTTCCCAAAGGTACGCCTAGATTGGTGAAGGGTAGATAACCAATGGAACATCCAAAGAGACCCGCAAGTGATTCAGCCT…	TTATTATGCATTCTCAGATCAATGACTCCTAACCCACCTTTTTCCTTAGGTCGACCGACTAAGCTCTGAAAAAATAGAGATTTTTTGGTTGAGTTGAAATCTGAACCTCTCCACAAGCAGTGTCTCCAAGATTTATCAATTGCATCTATAACTGGTTGTGGAATAGATAAAGAAAACATATAATATGTGGGTAGGGAAGAAAGGACTGAATTTACCAGAGTCAACCTATCTCCATAAGAAAGAAATGTTGTAGTAGCAAATTATCTCCTCTCAATTCTATGAATCAAAGGTGCAAATTCCATCACTTTTGGTCTGGTAGTTCCCAAAGGTACGCCCAGATTGGTGAAGGGTAGATAACCAATACAACATCCAAAGAGACCCGTAAGTGATTCAACCTTA…
505	Chr01	15881259	15309317	GTCGACGGCAAGACGACGGCGGCGGCACAAAACGGC	G	35	GCACCCGGGGAAAGTGGTGGAAGGCGGAGGGAGAGAGGGAGATGGCCGGAACGGCCGTAGCAAGAGCTCAGACCGGCCGATAAGAGAAGGTGGTGGTGGCGGTTTAACTCAAGGTGGAGGGAGAGGGGAAAGGGGAAAAATGGAATCACCTCGACGAGGCGGAGTTGGCGGCGCGAGGGTTTGTCTTGCGAACCTCCGGTGAGGGAGATCGGCCGGTGGTACTAATGGTCGGACATGGGAGAGAAAGAGAGAGAGAGCTTGAGGAGGTCGGTTTGTGTGAGGAGGAAGAGGGGACCTCGTCGTCCTTTTATAGGCGGCGAGAGGCGGTGGCGTAAGGCGGTTGCGGAGGAGGAAGATAAGGAGAACTCGGTGGCGGCGGCGTGGAGAAGTGGAGCACGG…	ATATTAAAGAAAATCTTTTATGACATTTTTTATATTTGGTTCTTATTGAATTCTATAAAATTGGAGCATCTTTATTTTTATCCTTTTCAAAATTTATATCTTAAAATAAATATCTTTGATTTTATTTTAAAAATATTTCAAACTCCTTTTGCTTTAAAACCCTTATTCAAAAGACCCCCAAATATTTCTCTTTTCAATCTATTGAAACCCTCCATTCAAATTTTCCCTTAGTTTTCATCTCCTTTGAAATTCCATTCCAAATCCCTCCACACAAAATTCCTAAAACCCCTATTTATTTTGGGCCAAATTCCCTTCAATTAACCCAATCAGCACAAGTCTACATGTCTTCTTCCTCCCTCTTGGGCTGTCAGCCCAGCCGAGCCGAGCCAAGCCGGCCCA…
506	Chr01	15904430	15300336	G	GCGATTAGTTTAACCTAAAAAGATTGATATGATC	33	GAGTAATTGTTGATGCAAAAAACACATACTGGCATAAGAGATTCGCTTTACTCTAGTGCAGATCCAAATATTTTCTTTCGGGTTTTGAGCGTGCCAGTTGGTTTGATCCTGCAACCAACAAAAAAACAAAGAAACCAAAGTTAAATCTACAACTGATAGCCGATCGGCTGGATTGCCGATGAGGTATCGTCTAATGTCAAGCCGATGCAATATAATTTGGATCAGCAATGAAGTATATAGAAGATAAAGAACTAAACTTATTTTCTCGGCTGTAGATATTAACAATATATAATCTATGCTTCAAAATATATTTAAACTAAGTGATTGGGATAGATTGGACAGATATAAATCACTTATATTTAAAAGTACTTCAAAGTAAGGATTATATAGGCTCATGTC…	CTTACATCTTTATGACACTCTAATCTTGTTTATGTAAATCTCAAGTTATCATATATGCTATATAATCTGGATCAATGCTCCTATCTAGTCTTGTCGGCTAGCTTCTATCATTAAGATCAGCCGATAGAATTAGATATCTTCATCGAATTAGATTATATAGTATATCTATCATCTCGAAAAGGTTTTCATTGGTTTGTTTATTAGATCTTATGTTTCTCTTTATGCTTAATGCTGCATCAGTTAAGTTTGATCTATTAAGTAATATCTAGAACCATAATCTCTTGCTTGCTTCATGATTATCAATAGAGATAGTATTGGAGTTTCAGCCGATCCTACCTAAGTTAGCTATGCTATCTTGTTCTCAATCTACTTACTTGATATGCTATGTCTACCCATTAT…
507	Chr01	15918526	15294115	A	AAAGTTACCTGTGTTCTATATTGATCTAAAGAAAGG	35	TTGTTGTTTATGATGTGATTTGTTAGGGTTCTCCATCTTCTGATGAACTGTGTTAATTCCTGTCGATAATGTAGGTCCTGATAGTGATGCATTCACCATTGAGTTGCACCATGGAGGTTTTTTTGCTGGGTGCGGTCATCTTAGGTCTTATGTTGATGAAAAAATTGACTGGTTTGACTGGATTGATTGTGATACATGGTCTGCCTTATGGTTTGAGGATATGTTTGAACAACTGGGCTACGATAGTGTGACAGACATTAAGTTTTATTGGTTGTTTACCAGGGAAAGATCTTAGTGATGGGCTGAGGGTAATTGCAACAGATGAAGATACTAATGTAATGGTCAGTGTAGTTCGCAAGGTGAGAAATCTGGTTGTGTATGTTGATCATATAGGCAGTA…	TAGGAAGCTTGATTTCCACTCTGTTCCTAACAGAGTACTCTGTAATTGCTTTCCTCACACTCTCAACTGAAGGAAAGACAAGCTCAACAGAGAAAGCTGGGTTGTTCATGTCCTCTTGGTTCCAAGAATTGAATCTCATTCTCTCTTCTCCTTCACCATCAGACTCAGGAAGATCCAGGGCATCATCCTCTGTGTCTGCATCATCATCTACTGCAGTAGCAGTAGGTACTCTGATCTCAATAGCCTTCAAATGGCTTCCATTTGCCTTCTTGTTGCCTCTAACCTTTGGCATATCCAAGTTAACAGCATCCTCTAATAAGTCATCATCTCCATCACTAAGATCATAGTCACTGTCAAACAATTCCTGCTGTTCATCTCCATCAGGTTCTTGTTGTTCAT…
508	Chr01	15981249	15356517	A	ACATGCCCCACGCCGGAAATCACTGAGCAAA	30	TGTTCCACAGCATGGCTTAGAGCAGAGATGTACCATAGGTCTAAAAATTACTTAGATACTACATCCGATTTAAAATATAGTAATTTTTAGCTATATATTTGGACATACTTCTCAGATAAGCCAGAAGTTATTATATTTAGGGACGGAAGTGGTAGCTACCATACATTTTTCTCTTCTGATAGGTGCTATACTCCAACGACATTAATGGGAGCTCCTGTTGCATCGACGGTGTTCATCAATTTGGTCAGGCAAATCTCCTGTTGCAAAATACACCATCAACGGGAGTATATACAAACGATGATCTCTTTTTCCCTGCACGTTTCTCACGCTGAAGTTCAGTTGAAGTTTTTTTTTTTTCTAATCATTATTAACAAGTTCTTGGATGTCCTTGGTAATCAC…	TCTCTGGAGAGTTAGTCAGAATTGTGTTCCACAGCATGGCTTAGAGCAGAGATGTACCATAGGTCTAAAAATTACTTAGATACTCCATCCGATCCAAAATATAGTAATTTTTAGCTATGTATTTGGACATACTCAGATAAGCCAGAAGTTAATGGGAGCTACCATACATGTTTCTCTTCTGATGGGTGCTATACTCCAACGACATTAATGGGAGCTCCTGTAGCATCGACGGTGTTCATCAATTTGGTCAGGCAAATCTCCTGTGGCAAAATACACCATCAACGGGAGTAAATACAAACGATGATCTCTTTTTCCCTGCACGTTTCTCACGCTGAAGTTCAATTGAAGTTTTTTTTTCTAATCATTATTAACAAGTTCTTGGATGTCCTTGATAATCAC…
509	Chr01	16074322	15434684	A	AACAGTCCTCGAAAATTTTTGAATTTTTCTT	30	ATTTCTCTTATTTATTAGAGTGCCACTTGGTGACTTGAGAGCATTTACAAGGTGCCACTTGGTGGATTGGGAGCGTTTGTAGGAAGTTTAATGGGCTCTTAGTATATAATAGATAATAAATAAATTAGAAAGGTAGCCCGCGCACATGCGCGGACACCTTCTTATATAATGTGAGTGAAATTTTATTATGAATATTTATGTGTGGGTGGATTTTTATTAAAATATTTTTTATTATATTCTAAACTAAAATGAAACTCATTTTGTGTGCTTTGAACGCTGGTTATTTTTTTTATAACTAACCATGCAACATATAAATTCTAAAATAAAATTATTTGAGATAATGCGGTTTTGAATTGGTGAGAAAATATTGCGTTGAAACAATGCATGTGGTTTCTATGA…	TTATTTATTAGAGTGCCACTTGTGACCTGAGAGCATTTACAAGGTGCCACTTGGTGGTTTGGGAGCGTTTGTAGGAAGTTTAATGGACTTTTAGTATATAATAGATAAATTAGAAAGGTAGCTCGCGCACATGCGCGGACACCTTCTTATATAATGTGAGTGAAATTTTATTATGAATATTTATGTGCGGGTGGATTTTTATTAAAATATTTTTTTATTATATTCTAAACTAAAATGAAACTCATTTTGTGTGCTTTGAATGCTGGTTATTTTTTTTATAACTAACCATGCAACATATAAATTCTAAAATAAAATTATTTGAGATCATGCAGTTTTGAATTGGTGAGAAAATATTGCGTCGAAACAATGCATGTGGTTTCTATGAGAAAATTTTGTATA…
510	Chr01	16119422	15471335	A	ATAATAACCATGCTTTCATGACAATTGAGACG	31	TTTTGGTGTCTATTAGTTTGTGTTGGAGTTTTGTTAAATTCTGATTGTCTCCTATGAACTCTATGGTGTGTGAATATAGTTCAGCGATTTTGTGTAATAACTAATAAGTGGTTGTACCTTTTTTTTGAGCAAACGCCGGGTTTATTTCCATTATCTTAAAAAAAGAAATTATTCACATTTTGCGCTGCCAGCAGTAGCTCTATTTGGAATAATGTAAGGATGAATTATCATATTTATTTTTGATGTAACAAATTTATACCTATGGTTGATGTACTATGTGGTCGATATATTTTATTTAGTGGAACTGAACTATTTTTGTACTAACCGTATTAAATATTTTGTATGAAATTCTTATGTTCCAAACTAGGCCTCAGATGTTATAAACTGTAATGTGTAAGT…	TTTTGGTGTCTATTAGTTTGTGTTGGAGTTTTGTTAAATTCTGATTGTCTCCTATGAACTCTATGGTGTGTGAATATAGTTCAGCGATTTTGTGTAATAACTAATAAGTGGTTGTACCTTTTTTTGAGCAAAGGCCGGGTTTATTTCCATTATCTTAAAAAAAGAAATTATTCACATTTTGCGCTGCCAGCAGTAGCTCTATTTGGAATAATGTAAGGATGAATTATCATATTTAATTTTGATGTAACAAATTTATACCTATGGTTGATGTACTATGTGGTCGATATATTTTATTTTAGTGGAACTGAACTATTTTTGTACTAACCGTATTAAATATTTTGTATGAAATTCTTATGTTCCAAACTCGGTCTCAGATGTTATAAACTGTAATGTGTAAGT…
511	Chr01	16133358	15485300	CTCATTTCATTTTTGTATGGAAAAATCAATTTTTTT	C	35	AGTCATTTCTTCATCCTACAAAGTGGTAGTAATATTGTTCACGAATTTTACGTATATCTCGTATGGTTTTATAAACTAAAAGAGAGATATGCAAATTCTGTAAACAATCTTACTATCACTTTATTGGATATAAAAATGATAAAAATAAAAGTTGTATATCTTGATGAGTTCTACAACTTTTATATTCATGACTTTTTCAAATGAAATTATTTACTGCTTCAAAATATTATTAGAAGTTGTTATTTTTTGAAATTCAAATTTTTAATTGATAAACAAAGTCACAAGAAAAAATGGCTAAAATAATAGCAGTAAGAACACAATAACATGATATAGCATGATTTTAGAAAAAATTAGGAAAAAGAATAATCCAATTTGAAGTTCATATGAGTGAGATAAACT…	AAAGTGGTAGTAATATTGTTCACGAATTTTACGTATATCTCGTATGGTTTTATAAACTAAAAGAGAGATATGCAAATTCTGTAAACAATCTTACTATCATTTTATCGGATATCTTACTATCACTTTATTGGATGTAAAAATGATCAAAATAAAAGTTGTATATCTTGATGAGTTCTACAACTTTTATATTCATGACTTTTTCAAATGAAATTATTTACTGCTTCAAAATATTATTAGAAGTTGTTATTTTTTGAAATTTAAATTTTTAATTGATAAACAAAGTCACAAGAAAAAATGGCTAAAATAATAGCAGTAAGAACACAATAATATGATATAGCATGATTTTAGAAAAAATTAGGAACAAAATCCAATTTAAAGTTCATATGAGTGAGATAAACT…
512	Chr01	16155509	15528593	GCGGCTGCAAAGCGCAGCCGAAGAGGTCTATTGTATAGTATATAATATGTTGTA	G	53	ACACAATCTAGCCTCCACGTTGGCTCTCGCCACATGAAAATTCTTATATTAATAAAAGAAATCTATATGGAAGTATAAATTAAAAATAACTGAAATGCAAAATTAAAAAATAAAAAATATTAGAAAAGAAGACTAAAGTCCATACAAATATAAAATTTAGAAGTAATCGAAATTTGAAATTATAAAAAGAAAAGAAAACTAAAAGTAGAGGTTAGAGTCCGCATAGAAATAAAATATAAAAATAACTAAAGTTTAAAATTAATAAATAAAAAAATATTAGATGAAGTGTCTAGATATGTGATTATCACTGTATTAGGTGCCCTCCAATATGGGCAGACCATGTACGGCCAGGAAGGGAGGATGGACCGGTGCTGCAACACCAAATTGCTAAGCATTATT…	ACACAATCTAGCCTCCACGTTGGCTCTCGCCACATGAAAATTCTTATATTAATAAAAGGAATCTATATGGAAGTATAAATTAAAAATAACTGAAATGCAAAATTAAAAAATAAAAAATATTAGAAAAGAAGACTAAAGTCCATACAAATATAAAATTTAGAAGTAATCGAAATTTGAAATTATAAAAAGAAAAGAAAACTAAAAGTAGAGGTTAGAGTCCGCATAGAAATAAAATATAAAAATAACTAAAGTTTAAAATTAATAAATAAAAAAATATTAGAAGAAGTGTCTAGATATGTGATTATCACTGTATTAGGTGCCCTCCAATATGGGCAGACCATGTACGGCCAGGAAGAGAGGATGGACCGGTGCTGCAACACCAAATTGCTAAGCATTATT…
513	Chr01	16158284	15531315	C	CGCTAGTCAAAATCAACCAAACACTAATCCCC	31	CCCTTTTGTTCAGCGCCAAATCGTATGGCGCTGAACTTAGACACCTCAGCGCCAAATAGCACGGCGTTGAATGCACGTTGGCACGCCGACTCAGCCTCCCATCCACGGTGGCACGGCATCCAGCGCCAGTTGACGTGGCGCTGAGGTATCTAAGTTCAGCGCTATACGATTTGACACTGAAAAAAAGGTCATTTTTTAAATAAGTTTTGGCCGCGCTTCATTTGTAAAATTAGTTTTTGCAAAGGGTTAAATTGTTAAATTTTAACTATAAGATTTTAATCTTGTCCTAGTTTCCTTCCATTAGAACTCGTATAATTCACGAGAATTGAGTTTTGGGATCAACATGTGTGAGCTGGATACATATGAAATGTTTATCTTAGGACTGTTTAATTTGAAAAG…	ACCCTTTTGTTCAGCGCCAAATCGTATGGTGCTGAACTTAGACACCTCAGTGCCAAATAGCACGGCGTTGAATGCACGTTGGCACGCCGACTCAACCTCCCATCCACGGTGGCACGGCATTCAGCGCCAGTTGACGTGGCGCTGAGGTATCTAAGTTCAGCGCTATATGATTTGACACTGAAAAAAGGTCATTATTTAAATAAGTTTTGGCTGCGTTTCATTTGTAAAATTAGTTTTTACAAAGGGTTAAATTGTTAAATTTTAACTATAAGATTTTAATCTTGTCCTAGTTTCCTTCTATTAGAACTCGTATAATTCACGAGAATTGAGTTTTGGGATCAACATGTGTGAGCTGGATACATATGAAATGTTTATCTTAGGACTGTTTAATTTGAAAAG…
514	Chr01	16200428	15563727	TTGGTTGCTATTAATCCATTGAGCAAGTAGGGAAAATATTCCTATCA	T	46	GAAAAAAGGGGAAAAAAAACCAGGCCAAAAAAAACAAAGTTGTCCGATAAAAAAACGGGAATCTGTCCGATCCAAGAAAAAAAGGGGCGAAAAAACTAGGCAAAAAAAGAACAAAAGTTGTCCGATCAAAAAAAAGGGCGAACAAAAACGGGCGAAAAAAAGAAAAGAAAAAACAAATATGTCTGATCTCTATCTTCTCTATCTCTACTTTTTTTTTACTTAAAAAATTTCAAATGTTTCCATCGTCCGTTTTTAATAAAAAAATTTAGTGATTTCCCTCATCCGTATCCACATATAACAAGAAAAGTGCGAAAAAATCGGATGCGGAAAAAAGGGCGAAACCCGCCTGATCCTTTCCTCGGCGCTTCGCTTCTCCTCCCCTCTATTTTCTTTTTTTTA…	CGAAAAAAGAGGAAAAAAACCGGGCAAAAAAAACAAAGTTGTCCGATAAAAAAACCGGAATCTGTCCGATCCAAGAAAAAAAGGGGCGAAAAAACCAGGCAAAAAAGAACAAAAGTTGTCCGATCTAAAAAAAAGGGCGAACAAAAAGGGGCGAAAAAAAGAAAAGAAAAAACAAATCTGTCCGATCTCTATCTTCTCTATCTCTACTTTTTTTTTTACTTAAAAAATTTCAAATGTTTCCATCGTCCGTTTTTAATAAAAAAATTTAGTGATTTCCCTCGTCTGTATCCATATATAACAAGAAAAGTGCGAAAAAATCGGATGCGGAAAAAAGGGCGAAACCCGCCTGATCCTTTCCTCGGCACTTCGCTTCTCCTCCCCTCTATTTTATTTTTTTTA…
517	Chr01	16290965	15676637	G	GTCGTCAACCCGTGCGTTGCACGGATTTGTTATTATTTGC	39	ATACTCTCCTGGTGTTTCGAGAGACCACCCCTGGTTACCAAGTTCCTTATGACAACCTGTCATGGCCATTCAACCGGGGCTAAATACGGAGGAGTACCCTCCCCATGAAAGTAACTTAGGATTATATACTAACGTGGAGGAATACCTGGGATGATTTTAGTGGGAAACCGGGGCATCAATCAACCATCGAAGGGTAGTGAAAATGGGTATAGGAGGAGAGAATTGACGATGTTAGCAGTAGGTGAGTAAGATTATGGATGGTTAGGAGGCAGGCACAGTTGTAGCATCTTAGACGGCACAAGCTCTCTCTTTTTTTTTTTTTTTTGACTGGATGACCAAGAGCTAACTATCAGTACTTTGGGCTTTCCAAACACATATCTTGAGAAATAGTTTATGCAT…	GCCCTCCTGGTGTTTCGAGAGACCACCCTTGGTTGCCAAGTTCCTTATGACAACCTGTCATGACCATCCAACCGGGGCTAAATACAGAGGAGTACCCTCCCCAAGAAAGTAACTTAGGATTATATACTAACGTGTAGGAATACCTGGGATGATTTTAGTGGGAAACCGGGGCATCAATCAACCATCGAAGGGTAGTGAAAATGGGTCTAGGAGGAGAGAATTGACGATGTTAGCAGTAGGTGAGTAAGATTATGGATGGTTAGGAGGCAGGCACAGTTGTAGCATCTTAGACGGCACAAGCTCTCTCTCTTTTTTTTTTTTTTTTGACTGGATGACCAAGAGCTAACTATCAGTCCTTTGGGCTTTCCAAACACATATCTTGAGAAATAGTTTATGCAT…
518	Chr01	16315382	15696686	ACACTTATAGTTATACTATTACTATTGAACTAAA	A	33	GCCCAACCAGGCCTAACCTAATCCTCTCCTCCTCCCCCAGATCCCTATCTTCTCTGGCTCTCTCTCTATGCTGTCCCTCAGCCGCCACTTGCCAGTCGAGGAGTCGGCGTAGCGCGTTGCGACGGCGATCCTGCGCGGCGGCCGCTCCTCCCCAACACGCGCTGGCCGCTCCTCCTCCCCAACACGCACCAGTTGCTCCTCCTCGGCTAGCGCCGCCGCTGCTGCTCGGCTGCAGGCTGCTAGCGCCGCCGCCAACTGCAGGCTACAAGCGCCGCCGCCGCTCCTCCTCAGCAGTGCAGGCTGCGTGTAGCACTGCAGCGTGCTCTACTGCTCTATGCTTGCTGTATGCCTGTATGGCTTGCCTCATGCCGATGACTTTTATTTTTACATTTTAAGCAA…	CAGGCCCACCTAGCTAGCCCAATAGCCCAACCCGGCCTAACCTAATCCTCTCCTCCTCCCCCAGATCCCTATCTTCTCTGGCTCTCTCTCTGTGCCGTCTCTCAGCCGCCACTTGCCAGTCGAGGAGTCGGAGTAGCGCGTTGCGACGGCGATCCTGCGCGGCGGCCGCTCCTCCTCCCCAACACGCACCAGTTGCTCCTCCTCGGCTAGCGCCGCCGTCGCTGCTCGGCTGCAGGCTGCTAGCGCCGCCGCCAACTGCAGGCTACAAGCGCCGCCGCCGCTCCTCCTCAGCAGTGCAGGCTGCGTGTAGCACTGCAGCATGCTCTACTGCTCTATGCTTGCTGTATGCCTGTATGGCTTGCCTCATGCCGATGACTTCTATTTTTACATTTTAAGCAA…
520	Chr01	16351309	15731293	G	GTACTTTCTGAATTAATGAAATACTCTTCTT	30	AACGCACGGGCATTTCACTAGTCAAATAAAATAAATAGAAAGTGAAGAAACCTCACTCCTAAGAAAACAAATGGATAACATGGGCCCACAAGTCAGGTGTAACCGTCGGAAACCAACTTTAACTACCACAACCGCCTAAAGAACCCACCTGTCACCCATTGTATAAAGGGGAGGTCGGTTGGAGCTGCCCCTGGTTCGGCCGAACCAGGGGCAAGCCGGCTCGGTCCTCCCCCTTCCACGTGGACATCCAGGATTGCTTCTCAATGACAGTTACAAGGGTAAAATGGATAATTCGCATGGAGTAACCGTCATACCGACCCTATAAAAGGAGAAGCTCACTTCACTTCTCAACACACTCAAGCAAGCTCAATTCCTCTTCATACATTAGTATTAGTAGTA…	TGCGCACGGGCATTTCACTAGTCAAGTAAAATAAATAGAAAGTGAAGAAACCTCACTCCTAAGAAAACAAATGGATAACATGGGCCCACAAGTCAGGTGTAACCGTCGGAAACCAACTTTAACTGCCACAACCGCCTAAAGAACCCACCTGTCACCCATTGTATAAAGGAGAGGTCGGTTGGAGCTACCCCTAGTTCGGCCGAACCAGGGGCAAGCCGGCTCGGTCCTCCCCCTTCCACGTGGACATCCAGGATTGCTTCTCAATGACAGTTACAAGGGTAAAATGGATAATTCGCATGGAGTAACCGTCATACCGACCCTATAAAAGGAGAAGCTCACTTCACTTCTCAACACACTCAAGCAAGCTCAATTCCTCTTCATACATTAGTATTAGTAGTA…
521	Chr01	16387413	15765925	A	ATATATATATATATATTTATTTATTTATTTA	30	TAAACAGTTACACAGAAGGAACCATTTGGACGTTTTAAACATTTTGATCTTTTCTAATGCTGCCAATTTTTGTGGGGCAATCCATAATTTAGCACCTTCATGTTTGGTTAATATACAATATAGATAGATAGATGGATGGCCAGTTGACAGTTAGTTTAGTGGCAGTTAGTTAAAACCAAATCCAATCTTGCTTTGATTTACTGCTACACGTAATTAAAAATTCTTACAGAACTCTTACAAACAATGATGTCAACCATTTGATTTAACTAGATGGGAATTACAAGAAATCTAGATGTACTCACAGCTTGACACATCAGTGTTAGTAAGAAAAAATAGTGCATGTAGCCATTTCCATTTTCTTTTCTCATCCTACGTATGTCCATAACTCCATATTAAGTA…	ATAAACAGTTACACAGAAGGAACCATTTGGACGTTTTAAACATTTTGATCTTTTCTAATGCTGCCAATTTTTGTGTGGCAATCCATAATTTAGCACCTTCATGTTTGGTTAATATACAATATAGATAGATAGATGGATGGCCAGTTGACAGTTAGTTCAGTGGAGTTAGTTAAAACCAAATCCAATCTTGCTTTGATTTACTGCTACATGTAATTAAAAATTCTTACAGAACTCTTACAAACAATGATATCAACCATTTGATTTAACTAGATGGGAATTACAAGAAATCTAGATGTACTCACAGCTTGACACATCAGTGTTAGTAAGAAAAAATAGTGCATGTAGCCATTTCCATTTTCTTTTCTCATCCTACGTATGTCCATAACTCCATATTAAGTA…
522	Chr01	16411788	15787188	TCGGACATCCCGAAGTGAACGACTGAAAGCT	T	30	GCCCCCTGCCACGTCGAACAGACTTCACGCTCCACTTTCTTGTATTCTCGCTTTGAGGAGTATGCCGTGGAACCTCCGAAGATGTGTGAGACATGAAGATCGGAATCTGGGTATGCTGAGTCCGATTCCTGAGTAGGCGCCTCAGCGTCCTTCTCAACCACGTGTACTCGTTTGCCTTTTTCCGATGCCATGTGTTTTGCGAGCGACTTTTTGAAAACGAGGCAATCTTCTAGAGAATGTATGTCCGACTTGTGTATGGGGCACCATGCTTTATTCGTGTCGCTGCCTTGTGGGTCTGGGCGCTTGGGAGGGTCCGCATATTCTGTTGCGAGAACTTCCGATTGAGCTTTCCTTTTCCCACTCTTGCGATTTTTCTTCTTGCTTGACTCAGGTGCGTCC…	GCCCCCTGCCACGTCGAACAGACTTCACGCTCCACTTTCTTGTATTCTCGCTTTGAGGAGTATGCCGTGGAACCTCCGAAGATGTGTGAGACATGAAGATCGGAATCTGGGTATGCTGAGTCCGATTCCTGAGTAGACGCCTCAGCGTCCTTCTCAACCACGCGTACTCGTTTGCCTTTTTCCGATGCCATGTGTTTTGCGAGCGACTTTTTGAAAACGAGGCAATCTTCTAGAGAATGTCTGTCCGACTTGTGTATAGGGCACCATGCTTTATTCGTGTCGCTGCCTTGTGGGTCTGGGCGCTTGGGAGGGTCCGCATATTCTGTTGCGAGAACTTCCGATTGAGCTTTCCTTTTCCCACTCTTGCGATTTTTCTTCTTGCTTAACTCAGGTGCGTCC…
523	Chr01	16423271	15816290	T	TTACTACTTTCCAACCATTGTTGAGTAACTACGTCTTTCGACG	42	GTTGGCGGTATGTTATGAGACCCTTCGACCAGACGTGCCGAAACCATGCAACCAGTGGGGGTTCAAGCCCAAGACGTCGAGTCTGTCGGGGCGAAGTCCCCATGGCGAAGACTATCAAGCAAAGACGGCGAAGGGCGAAGGATCGTGCTGGTATCCCACAAGGTTGGAGGCATCTTGGGCAAAGACTGTATGGCGAAGAATGTATGGCGAAGGCAGATGGCTTCGCCATAGCAAGTTCAACTTCAAGGAGACCCAAGACGCCATCTTAGCCGATCAAGCCCAGGGGCCACTGGGCCAGCGTTCCCCAGTCGGCCCACTAGAAGCCCATGTACCTCAATTACACTATATACCCATGTAAATGTCCCTTTCATAAGGGCAATCATATAAATTCCCCTGTAA…	TGGCGGTATGTCATGAGACCCTTCGACCAGACGTGCCGAAACCATGCAACTAGTGGGGGTTCAAGCCCAAGACGTCGAGTCTGTCGGGGCGAAGTCCCCATGGTGAAGACTATCAAGCAAAGACGGCGAAGGGCGAAGGATCGTGCTGGTATCCCACAAGGTTGGAGGCATCTTGGGCAAAGACTGTATGGCGAAGAATGTATGGTGAAGGCGGATGGCTTCGCCATAGCAAGTTCAACTTCAAGGAGACCCAAGATGCCATCTTAGCCGATCAAGCCCAGGGGCCACTGGGCCAGCGTTCCCCAGTCAGCCCACTAGAGGCCCATGTACCTCAATTACATTATATACCCATGTAAATGTCCCTTTCATAAGGGCAATCATGTAAATTCCCCTGTAAAA…
525	Chr01	16473235	15895699	TCTCTAATATCAGTGATAAAATCATTTACTTT	T	31	TGATCTGTTGTCCAATGCAATTCCATTTTTAATTATGCATCGTTGATTGTTTCGTCGTCTGTATATTGTAAAACCAGATTCATCAATAATAGTTTCATCCTGGAAGTCCTTAGGATAATGTTTTCAACATTTGCCATTTTTCATGCAAGGGCAATTTTTGTTTGCGTCGCCACAAGGACCATGCATCATGAACTCACTAACCAATTCATATCCTAGACGATCTGTGTCATAGTCAGGTATCTCAGCACAGATGAAGCCATCTATTACAGATGCTGACACATCAGCAGTGGATGCTGCAAGCCAAACTAAGCAGTGGATATGTGGCAGCCCACGCTTCTGGAACTCGACAGTATACAGCACTAAGAAGGTTTAAGCCAATGAAAAGGTATGAGAAATATA…	TGATCTGTTGTCCAATGCAATTCCATTTTTAATTATGCATCGTTGATTGTTTCGTCGTCTGTATATTGTAAAACCAGATTCATCAATAATAGTTTCATCCTGGAAGTCCTTAGGATAATGTTTTCAACATTTGCCATTTTTCATGCAAGGGCAATTTTTGTTTGCATCGCCACAAGGACCATGCATCATGAACTCACTAACCGATTCATATCCTAGCCGATCTGTGTCATAGTCGGGTATCTCAGCACAGATGAAGCCATCTATTACAGATGCTGACACATCAGCAGTGGATGCTGCAAGCCAAACTAAGAAGTGGATATGTGGCAGCCCACGCTTCTGGAACTCGACAGTATACAGCACTAAGAAGGTTTAAGCCAATGAAAAGGTATGAGAAATATA…
526	Chr01	16490297	15916771	A	ATCTATGCTGCTCCCTCCATCCCAACATATAA	31	CGATGAAATTAGCCCGCCGCTGCTGCTGTTGCCATGACGAGAGAGCCAGGGTTTGGTATGGAGAATGGGGTAACACACATGTAAGGGCTGTGTGGCTAATTGATGTTGTATTTGGGGGTATAACAATCCTTTTATTCTGTAAATCATTTTTCATTCCCTTTTTCTTTTCTTTAACTCCCTAATTCTTGGCACACCTAACAAACATCCAAACCAGGGGCAAACGGGAGCTTCGGTTACAAAAGTGATGGCAAAATCATAAAGTAAAAAAAGAGGGGTAAAATCACAATTGTGTTTGAAAATAGGGGAAGAACACAATTTCCCCATTCTAATTTACATTGAGTGGTTCTCAGGGATGTCAGGGACTCGTGGCTGATGTTTCAGAAAGTATTTTTGGCCACC…	CGATGAAATTAGCCCGCCGCTGCTGCCGTTGCCATGACGAGAGAGCCAGGGTTTGGTATGGAGAATGGGGTAACACACATGTAAGGGCTGTGTGGCTAATTGATGTTGTATTTGGGGGTATAACAATCCTTTTATTCTGTAAATCATTTTTCATTCCCTTTTTCTTTTCTTTAACTCCCTAATTCTTGGCACACCTAACAAACATCCAAACCAGGGGCAAACGGGAGCTTCGGTTACAAAAGTGATGGCAAAATCATAAAGTAAAAAAAGAGGGGTAAAATCACAATTGTGTTTGAAAATAGGGGAAGAACACAATTTCCCCATTCTAATTTACATTGAGTGGTTCTCAGGGATGTCAGGGACTCGTGGCTGATGTTTCAGAAAGTATTTTTGGCCACC…
527	Chr01	16502556	15928951	TATTAAATGCTATATGCTTGGGCAATTACCTTAGGGAAGGTC	T	41	CTAAGCTACCTCAATTTTCCCCCTTGCCTATATAAGCCGCTACCGCCATTTTGAGATCTCTTAGCACCATACAATCCATAAGCAAACGAGAGTAGTATGAGCAGCCCTAGGTATGACTCCAACATTTATATTTTGTTTGAGCATATTTGATTGTTGTTTGAATATTGGTTTTTATCGCCTATCATAGAATGTGTATCGGTTAGTCGTGAGGCAACTCATGCAACTTCCAGGAGGTGAAGGTGGATCAAGTATTATCAAGAATAAGGACTATCCTGAGCAGATAAGTCATCACCCCTCCCTTAAGCATGTTGATCCCAATTGCGAACTTACTTTGTTTACAAATAAAAATGTATGCAATGATGAATATCCTACTTGCTATTGTGACATGCATTTGACTAT…	CTAAGCTACCTCAATTTTCCCCCTTGCCTATATAAGCCGCTACCGCCATTTTGAGATCTCTTAGCACCATACAATCCATAAGCAAACGAGAGTAGTATGAGCAGCCCTAGGTATGACTCCAACATTTATATTTTGTTTGAGCATATTTGATTGTTGTTTGAATATTGGTTTTTATCGCCTATCATAGAATGTGTATCGGTTAGTCGTGAGGCAACTCATGCAACTTCCAGGAGGTGAAGGTGGATCAAGTATTATCAAGAATAAGGACTATCCTGAGCAGATAAGTCATCACCCCTCTCTTAAGCATGTTGATCCCAATTGCGAACTTACATTGTTTACAAATAAAAATGTATGCAATGATGAATATCCTACTTGCTATTGTGACATGCATTTGACTAT…
528	Chr01	16563607	16034084	G	GAGGTGGGAGACGGGCCCGACAGGTGGGAGACGGACCCGAC	40	GCTCACCGGCGCACGGCGCGGAGTGAGTTCCGGCGGCGGAATCTGACAGGAGAGGGGTGGACGAGGTGGCCCGCACGACGGCGAACGCGACGACGTCTACGGCGCGGCTCGGCGCAGCGGCTTGCGACGGTAGCGGCGGCCGGAGCGGTGTCGGCGGCGGCGGAAAAGAGGACGACGGCGCTAGGGCGATGGAGGGCACGTGAACGGATGGTTGCAAAACGAAAAAGAGAGAGGAGGGAACGGGGAACCTTTATATAGGCCCGCGGGGGTCGATCGTGGCCGGGGTGACCGCGATTTTGCCGGCGGAGTGGGGAGAGGTGGGGAGGAGAGAGAGGCGGGATTCAAAAATTGAATCCCGGCCGTCTCGAGCGCGGGCGCGGGCGGGAGAGAGAGGGAGTG…	TCCCCGGCGCACGGCGCGGAGTGAGTTCCGGCGGCGGAATCTGATGGGAGAGGGGTGGACGGGGTGGCCCGCACGACGGCGAACGCAACGACGTCTACGGCGCGGCTCGGCGCAGCGGCTAGCGACGGCTAGCGGCGGCCGGAGCGGTGTCGGCGGCGACGGAAAAGAGGACGATGGCGCTAGGGCGATGGAGGGCACGGGAACGGATGGTTGCAAAACGAAAAAGAGAGAGGAGGGAACGGGGAACCTTTATATAGGCCCGCGGGGGTCGATCGTGGCCTAGGTGACCGCGATTTCGCCGGTGGAGTGCGGAGAGGTGGGGAGGAGAGAGAGGCGGGATTCAAAAATTGAATCCCGGCTGTCTCGAGCACGGGCACGGGCGGGAGAGAGAGGGAGTGG…
529	Chr01	17078657	10718010	A	ACTGCCTTTCCATGAAAGGATACATGATCCCAA	32	CCGGCTCTACGGTAATATGATGTTCAGGGTCTCTCAAATATTTTGTCAACATGGAAATATGGAACACATCATGTACACCTTTCATGGACTCTGGTAACTCGAGGCGATACGCTAGGATTCCAGCTATTTCCACTATCGAGAATGGACCAATATACCTACGGCTGAGTTTGCCTTTCGTTCCAAATCTCACAACACCTTTGGTAGGAGATACCTTTAGAAGTACTTGGTCACCCACTTCAAACTCTAATTCCCGTCTTCTGACATCAGCGTAGCTCTTCTGCCTACTTTGAGCTACGAGCATGTGTTTTCGTATTTCTGCTATCCGTTCTGTGGTTTGTTGAACCCAATCGGGTTCTAAAACAGCTCTCTCCCCTATGGAATCCCAACACAATGGGGATC…	TCGGCTCTACGGTAATATGATGTTCAGGGTCTCTCAAATATTTTCTCAACATGGAAATATGGAATACATCATGTACACCTTTCATGGACTCTGGTAACTCAAGGCGATACACTAGGATTCCAACTCTTTCCACTATCGAGAATGGACCAATATACCTAGGGCTGAGTTTGCCTTTCGTTCCAAATCTCACAACACCTTTGGTTGGAGATACCTTAAGAAGTACTTGATCGCCCACTTCAAACTCTAATTCTCGTCTTCTGACATCGGCGTAGCTCTTCTGCCTACTTTGAGCTGCAAGCATGTGTTGTCGTATTTCTGCTATCCGTTCTGTGGTCTGTTGTACCCAATCGGGTCCTAAAATAGCTCTCTCCCCTATGGAATCCCAACACAATGGGGATC…
530	Chr01	17134052	16171029	AGGCCCGAGCTTAATCCTTATATTGGCCGGGGTGCTACTTCC	A	41	TGTCAATTAATGGAAAAATTGGCACACAAGGGTGCGATGTTTTTGACCGGAATCAAAAAGTTCAAAAAACGCCAAAACATGATTTTTGGACGTATTGGAGTGTATTGGGTGCGTTCGTGGCAAAAACTCACTTCGTGATTTGCGCGGCGAACTTTTGAAAAGTTCAAAAAGTGCCAAAACATGATTTTTGGACATATTGGAGTGTATTGGGTGCGTTGATAGCAAAAATTCACTTCGTGATTCGCGCGGCGAACGTTTATCAATTAATGCCAATGTTGGCACACGAGGGTGCGATGTTTTTGAAAGGAATCAAAAAGTTCAAAAAACGCCAAAACAAGATTTTTGGATATATTGGAGTGTGTTGCGTGCGTTCGTGGCAAAAACTCACTTCGTTATTTG…	GTCAATTAATGCCAATGTTGGCACACGAGGGTGCGATGTTTTTGACCGGAATCAAAAAGTTCAAAAAACGCCAAAACAAAATTTTTGGACATATTGAAGTGTGTTGCGTGCGTTCGTGGCAAAAACTGACTTCGTGATTCGCGCGGCGAACTTTTTAAAAGTTCAAAAAGTGCCAAAACATGATTTTTGGACATATTGGAGTGTATTGGGTGCGTTGATAGCGAAAATTCACTTCGTGATTCGCGTGGCGAACTTTTGTCAATTAATGCCAATGTAGGCACACGAGGGTGCGATGTTTTTGAAAGGAATCAAAAAGTTCAAAAAACGCCGAAACATGATTTTTTGGATATATTGGAGTGTGTTGCGTGCGTTCGTGGCAAAAACTCACTTCGTGATTTG…
531	Chr01	17164503	16417290	T	TAGGAGAGCATCTGGAGCGTCCACGCCAAACCCC	33	CCTACATCAAACGTTGCCGATTACCAAATTTCACTGTTAACAAACGTACAGTGGGATACGCAGCAATTACTGGATAACAATTACCTAAACACCACGTCTAAGCAATTAATATCTACTTTAGTGTTTATAACTCACCAAAGCAATCACTATATTTTAGTTGATTATAGTGAACAATAATCCTATATGCTATTTAGGAACTAACCAAGAGATAATTCTCACAAGATAAATCTAAATTACTCACGAAGAATATTATATTGAATTCAGAGAAATAAACAGAATAAAAGAAATAGAAGAAGATTACCGACAACTCCGGAATTCTTACGACTTCTTCTACTCTACTCTCTTCCTATTCTAGTATACAATATAGTACAATAGAGCCTCTTACAATTCAGCTCAAGC…	CCTACATCAAACGTTGCCGATTACCAAATTTCACTGTTAACAAACGTACAGTGGGATACGCAGCAATTACTGGATAACAATTACCTAAACACCACGTCTAAGCAATTAATATCTACTTTAGTGTTTATAACTCACCAAAGTAATCACTATATTTTAGTTGATTATAGTGAACAATAATCCTGTATGCTATTTAGGAACTAACCAAGAGATAATTCTCACAAGATAAATCTAAATTACTCACGAAGAATATTATATTGAATTCAGAGTAATAAACATAATAAAAGAAATAGAAGAAGATTACCGACAACTTTGGAATTCTTACGACTTCTTCTACTCTACTATCTTCCTATTCTAGTATACAATATAGTACAATAGAGCCTCTTACATTTCAGCTCAAGC…
532	Chr01	17168065	16421061	T	TCTACAGGGAGTCGACATGACTTCCCATAGACTATCTGATAGGGGGACATT	50	GCTGATTGGGTGCTGCCCTGTTTCGGCCAAACCCTGGTGGGTCCAACTGGCCGCCAAATTTTCCCTAGGCCCCCTAAATCCTAAGCTAAGCACAAAAATGACAACTTTATAGAGTTTTAAGCATGCATTAGATGAAATCATCATGGTTCATAATCGATTAATTCAATAACATCCACTTCTTCATCTAAAGTTTCATTCGGCTCGAGGAAAATCTTTAAGCGTTGACCGTTTACCTTGCATATATTACCTGAATCGTCGCGGAGTGTGATTCAGGTAATATATTCAAGGTATCATGCCAGCGCTCCGTTCTTTCTTTGTATATCTTCGCATTGTAGTAAGCCTTCCCTCTTCATTCTTCAAGTTCAGCAATTTGCATTTTTCTCCATTCTCCTGCTCCTT…	TCCACTTCTTCATCTAAAGTTTCATTCGGCTCGAGGAAAATCTTTAAGCATTGACCGTTTACCTTGCATATATTACCTGAATCATCGCGGAGTGTGATTGCCCCGTGCGAAGAGGTGTTGATGACGTCGAACGGTCCTTCCCATTTACTTTGTCTCCTAGAGCACTTGATTTTTATCAAGAAATTCAAGCTGGGAGACAAAGTAAATGGGAAGGACCGTTCGACGTCATCGACACCTCTTCGCACGGGGCAATCACACTCCGCAACGATTCTGGTAATATATTCAAGGTATCATGCCAGCGCTCTGTTCTTTCTTTGTATATCTTCACATTATAGTAAGCCTTCCCTCTTCATTCTTCAAGTTCAGCAATTTGCATTTTTCTCCATTCTCCTGCTCCTT…
533	Chr01	17189381	16485916	C	CAACTGGATCCATAGAAGAGGAACTTTTCCAGCCAC	35	CTTCCCTGATGTTTGATATCTTTCATGATTGATGTCTTCAAATCTGAAGTCTGATGGGAGCTCAAGGTCTACTGAGTCTTCATAAAGAAACCAAACTCGGGCATCTTTCTGGAAGCCTTCATAAAAGCTGCAGAACCAATCTTTGAGCAGCTCAGCCGATAGTTTTGCCCCAGCATTGGCTGGTGTGGATGCGTATTCTCCATATGACATGCATCTGCGATGGGTGCGTTCTTCTCCATCGTCTTCTACAATTGGCTCCAACCTTGGGAATTCAGCTTCTGTTACAGATGGCCGATTGACAACTTTCATGACTACCAGGTTTAGCCAGGTCTGCAGTAGCCACCATGGTCCACCTGCTCCGACTATTGAGCCGACGGCTATCTTAGCCGATGCATTGTT…	CATGGGCCCCACATGGGCCAGGGTCCCAAACAAAGTTACAAGCCCATTGGCCCAATACAGGTGACGCAGCACCTTGCTTCTGTGATTGCGGCCAAACAAGATAGAATTCCGAGATGAGGCTGAATCCGTTGGAAGGAGGACTTCGAGAGCTTTCCATCAAGTACTCACGGGCCCAAAACGGAGCACGTATGTAGATTTGGCGGCCGTTTGAAGTCAGCAATGTAACACGTGGCCGAATCAGATTGCAGCACATGGAAGACTTGATCTTGATGTCTTCTTGTTGATTCATGATGTGAGCAATGGTCGTATCCATAGTAGCCATGGTCACATCAGCAGTAGCCACCATGGTCCACCTGCTCCGACTATTGAGCCAACGGCTATCTTAGCCGATGCATTGTT…
534	Chr01	17241746	16555298	TGGAGGCCCAATAAGTCAATGAAAACCATTTAGG	T	33	GATCTATGATCTAATACTTGCATGGTTCTTGGTTTACACGATAGAAAATTTTGATTTATGCTATCGTAGTCTACGCGTATCCCAACAGTGGTATCAGAGCCACTTTGTATAGTTTATGATCTAGATCATTTCATATTTGATATGCGGGTGTAGTAGATGAGATCTATTATGTTGTATATGAGTTCTTAGATGTTCGGAACATGAGATGAACCGATAGCCGCATGGGTTGATGAGATCAATCGGTATGTGTGTTGATGATTTCATTGGAATGTCCAGTACTCACCACGGCCGAGCGTGTTGAAGGTCCTTAATCATAATATTTGACCATCAATAACTGCATATAAGGAAATAAAACATGGTATCCAACTTAGTGGTAGGTATTATTACTAATCATTTCTA…	GATCTATGATCTAATACTTGCATGGTTCTTGGTTTACACGATAGAAAATTTTGATTTATGCTATCGTACTCTACGCGTATCCCAACAGTGGTATCAGAGCCACTTTGTATAGTTTATGATCTAGATCATTTCATATTTGATATGCGGGTGTAGTAGATGAGATCTATTATGTTGTATATGAGTTCTTAGATGTTCGGAACATGAGATGAACCGATAGCCACATGGGTTGATGAGATCAATCGGCATGTGTGTTGATGATTTCACTGGAATGTCCAGTACTCACCACGGCTGAGCATGTTGAAGGTCCTTAATCATAATATTTGACCGTCAATAACTGCATATAAGGAAATAAAACATGGTATCCAACTTAGTGGTAGGTATTATTACTAATCATTTCTA…
535	Chr01	17293524	16592780	T	TTGTTAGGTGGTTGCAACTATGCTACAATAACTTAAAAAGTGATGTA	46	TCCGCTCCCACTTTAGGTGGAACTGAAACTGTTTGGCTGGGCTCCAGCTCCAGGAGAGGTGGGGGTAGAGCTAGAGTTGTGCCAAACAGGCCCTCAATAGAGAAAACTCGATGTTTCAATCGCTATAAATTAAATGCTCCAAGTGTGCTTCGATTATGTTTTACCGGTTAAATGGTTGGTCCCCTTTTCTCTGTGTTGAAAATTCAATATATTTTCTTTGAGCAATGAAACACTTTTCTTCAATCAATGAAAGATCCGAAACATTTTTATTGAAAATTTTTTCATGGTGTTGATACATGTTAAAACACTTTGCAATAACGTGGTGCAATATTGTTCGACAATTTGTAAAAGAGTAAATTGCATCCATGGTATGATAACTTGGCAGGTGGGTGTAATTTA…	TCCGCTCCCACTTTAGGTGGAACTGAAACTGTTTGGCTAGGCTCCAGCTCCAGGAGAGGTGGGGGTAAAGCTAGAGTTGTGCCAAACAGGCCCTCAATAGAGAAAACTCGATGTTTCAATCGCTATAAATTAAATGCTCCAAGTGTGCTTCGATTATGTTTTACCGGTTAAATGGTTGGTCCCCTTTTCTCTGTGTTGAAAATTCAATATATTTTCTTTGAGCAATGAAACACTTTTCTTCAATCAATGAAAGATCCGAAACATTTTTATTGAAAATTTTTTCATGGTGTTGATACATGTTAAAACACTTTGCAATAACGTGGTGCAATATTGTTCGACAATTTGTAAAAGAGTAAATTGCATCCATGGTATGATAACTTGGCAGGTGGGTGTAATTTA…
536	Chr01	17308487	16617329	C	CTGTGCTGAGGCTATCCACTGTTCTAGCTTGAC	32	TGTGGTGATTCCCCACGCTTTGCTGTGGAAATTCCTAACTAACTTTTAATATTTTTTAATAATCGAGCTAAAAGTAAAAATAATATTAGTTATTAACAACGGGCCTGTTCGGCTGCATGTGCTGCAGCGCAGCCGCAGCCACTGCAACCAGCTTACCTAACAGGCCCAACAAATAAAAATGGTTTGTCAAACCATGTTCAAAGAGAAGAAATATATTTAGTAGACTCTGTATGAGATTGTAGATGAAATATGATATTCCCGTACTTTGATTATATGGACGAATATATGTTAATTATTATAAAAATGATGTGTTTGTGTATGTGTGTGTTAAAAATATTGTGAAAATATTGTGAAGGAAGATGATTGGATGTTGATTTATAGAATTCAACGAATTACAGA…	CTGCGGTGATTCTCCGCGCTTTGCTGTGAAAATTCCTAACTAACTTTTAATATTTTTTAATAATCGAGCTAAAAGTAAAAATAATATTAGTTATTAACAACGGGCCTGTTCGGCTGCATATGCTGCAGCGCAGCCGCAGCCACTGCAACCAGCTTACCTAACAGGCCCAACAAATAAAAATGGTTTGTCAAACCATCTTCAAAGAGAAGAAATATATTTAGTAGACTCTGTATGAGATTGTAGATGAAATATGATATTCCCGCACTTTGATTATATGGACGAATATATGTTAATTATTATAAAAATGATGTGTTTGTGTATGTGTGTTAAAAATATTGTGAAAATATTGTGAAGGAAGATGATTGGATGTTGATTTATAGAATTCAACGAATTATAGAT…
537	Chr01	17325794	16634511	G	GATACCTACGTTTGAATACCTGCTAGAAAAAAAAAACTAATTACACATACTATA	53	CTAGAAGAGAAGCTATGGTAACACAAATTCGAGAAAGCGTGGGTAAAGAGGGATGAGAAAGAGGATGTGCGTAGCGGATGGATGCTCACCAGGATGCGGTGACGGCGCCCCTGCTTGCCCGTGGGATGGATGGTGATCGGCGGCGGCACAGGCGGCGGGCGAATTCACGAGGAGTCAACACCGAGGGAACAGGGAAATATCCTCGAGGCACCGCACTGCACTGAACGACGATTTCCTTCTTCTTAGGAACAATTACACACGATGGATGGGGATCGGCGCAGGCGGCGGTGCGGAGGATGTGCTCACCAGGATGGATGCGGCGGAAGCAGCAGGACTAACGACGGCGTCCCTGCTCGCTCGCGGGATGGATGGGGATCGGCGGAGGCGGAGGCGGAGGCG…	CTAGAAGAGAAGCTATGGTAACACAAATTCGAGAAAGCGTGGGTAAAGAGGGATGAGAAAGAGGATGTGCGTAGCGGATGGATGCTCACCAGGATGCGGTGACGGCGCCCCTGCTTGCCCGTGGGATGGATGGTGATCGGCGGCGGCACAGGCGGCGGGCGAATTCACGAGGAGTCAACACCGAGGGAACAGGGAAATATCCTCGAGGCACCGCACTGCACTGAACGACGATTTCCTTCTTCTTAGGAACAATTACACACGATGGATGGGGATCGGCGCAGGCGGCGGTGCGGAGGATGTGCTCACCAGGATGGATGCGGCGGAAGCAGCAGGACTAACGACGGCGTCCCTGCTCGCTCGCGGGATGGATGGGGATCGGCGGAGGCGGAGGCGGAGGCG…
538	Chr01	17334878	16637334	TAAATATTACTCAAGTGAGTTATGACTTTACT	T	31	CCACCTTGAAATATGTTATATTTATATCTTTTCTAACATTTTCTAATTGATTTTTTTCCATTTTTACTTGCATGTTATTTGAATTAATATTTTTTAATCAAATAGATTATATTTTTTAACCCAAAACAAACATATTATCAAAATATATTACATTTACTTAACCTAATTTAGTGTTGTAGATGTTAATAATTTTGTACAAAGTTGGTCATGTCAAAAGGACTTATAATATGGAATGGAGGGAGTAGTAGTTATCATGACATATTAGTAGTAATTTTTACATTATTTACTAGTAATTACTGTGATATCAAGTTGCATAACTAATTTTTAGAATTTAGGAGATATTTTACCTCAACATAATCTAGAATTCTCTTAACTAATTATGTATGAAGATAATATTCA…	CCACCTTGAAATATGTTATATTTATATCTTTTCTAACATTTTCTAATTGATTTTTTTCCATTTTTACTTGCATGTTATTTGAATTAATATTTTTTAATCAAATAGATTATATTTTTTAACTCAAAACAAACATATTATCAAAATATATTACATTTACTTAACCTAATTTAGTATTGTAGATGTTAATAATTTTGTACAAAGTTGGTCATGTCAAAAGGACTTATAATATGGAATGGAGGGAGTAGTAGTTATCACGACATATTAGTAGTAATTTTTACATTATTTACTAGTAATTACTGTGATATCAAGTTGCATAACTAATTTTTAGAATTTAGGAGATATTTTACCTCAACATAATCTAGAATTCTCTTAACTAATTATGTATGAAGATAATATTCA…
539	Chr01	17348420	16650658	A	AGGTAATTAATAACTTAGGCATGGTGTCTAGATTATAGATTACCTTTGTTTG	51	TCTGACAAAAATGAAGCTCTGGCCAATCAAGCGCGAGCACAAGGACTAAAGGGCCCATCTGACTAATCAAGCGCGAGCACAAGAACTAAAGGGCCCACCTGACTGTCAAAACCGATTTGAGATAGGGCCAAACCATCTTTAACCGTCATAAGAGTCCACGTATCAGTAACTGTCCAAAATCGGTGGCCAGAAGGCGGAGGCCTAGTTCGGCTGAACAAGCCGTGGTGCCCCTGGCTACCCCTTTCAATGTGGCAGCTCCCCATTGGATTGACTATGGCTGTTATGTGTGCACCAACCTCACTAATCACCATTACAACCATCATTTGGCACTATGAAAGGAGGAGCTCAACACACTTCACAACACACAACAAAGTAAAGTTTTTTTTTACTTAGTTTACT…	CTGACAAAAATGAAGCTCTGGCCAATCAAGCGCGAGCACAAGGACTAAAGGGCCCATCTGACTAATCAAGCGCGAGCACAAGGACTAAAGGGCCCATCTGACTGTCAAAACTGACTTGAGATAGGGCCAAACCATCTTTAACCATCATAAGAGTCCACATATCAGTAACTGCCCAAAATCGGTGGCCAGAAGGCGGAGGCCTAGTTCAGCTGAACAAGCCGTGGTGCCCCTGGCTACCCCTTTCAATGTGGCAGCTTCCCATTGGATTGACTATGGCTGTTATGTGTGCACCAACCTCACTAATCACCATTACAACCATCATTTGGCACTATGAAAGGAGGAGCTCAACACACTTCACAACACACAACAAAGTAAAGTTTTTTTTTTACTTAGTTTACT…
541	Chr01	17381104	16685373	GGATAAAATTCGGGGGTATAGAAGGGATTAGGTGAGTTTT	G	39	TGCACTATTGGGTATGGAAATGAAATTGTGGGTGCGCATGATATGAACTGTTATGTATGGATGATGGAAAGATTATGTTCTGTGCATGATATTGTGTGTTCTGTATGAATATCTCTATTATTATATATGATGCTATTGATGCTCTTATTTTACCATAATCAATTTCTTGTACAGAGGAACCAATTTCTTCTATAGAGAAAACTGATGACTGTACAGACAGTCAGCTTTTCCTGATCTATTATTTTTCCAAACAAAAAGTTCATTATATTGCATTTTTTTCAGTGCCACAATAAATTTGTTATACGCTCATTATTTAGTCTCATAAAATACACATATTGTTCAGTTAACATTTTTTCAATTTTTTCAATCTAGCTGCCACTCCTACATCTACAAGGGGAT…	GCACTATTGGGTATGGAAATGAAATTGTGGGTGCGCATGATATGAACTGTTATTTATGGATGATGGAAAGATTATGTTCTGTGCATGATATTGTGTGTTCTGTATGAATATCTCTATTGTTATATATGATGCTATTGATGCTCTTATTTTACCATAATCAATTTCTTGTATAGAGGAACCAATTTCTTCTATAGAGAAAACTGATGACTGTACAGACAGTCTGCTTTTCCTGATCCTATTATTTTTCCAAACAAAAAGTTCATTATATTGCATTTTTTTCAGTGCCACAATAAATTTGTTATACGCTCATTATTTAGTCTCATAAAATACACATATTGTTCAGTTAACATTTTTTCAATTTTTTCAATCTAGCTGCCACTCCTACATCTACAAGGGTAT…
542	Chr01	17405251	16709836	G	GTACTCGTGTGGCCGGTATGGATACTTGAAGGG	32	AATATTAAACAAACTTGCTCTTAGTGATGTTCTCACAGAAACGAGAGATTCGCTTAATTGTATTTTTTCCGAGGAGGCATTTGTGGTAAATTGTGTTTGCCTCTTTACGCTCCCTTCTGTACCAATGCTTTTCTAGAAATTTTCTATTCTTGCTTTTGTATTTTAACATAATAGAAAAAATGTATTCATTCCTATTTTCTAACATTTTCATATTTGTTCTGACTATTTGCTTGCTCGAGAATTGTATACAGATACTCTTGAATCAAACGACATGCCTAATTGAGCTCCAGATTGTTTAAATAGAGTAATTAGAGGTTATCGTTTGCACAAGATAGTGTCTGTTGGGTGAAACGCACGAGCAACTATGGATTTTTGCAACAAATACGGAGATAGAGAAAA…	TATTAAACAAACATGCTCTTAGTGATGTTCTCACAGAAACGAGAGATTCGCTTAATTGTATTTTTTCCGAGGAGGCATTTGTGGTAAATTGTGTTTGCCTCTTTACGCTCCCTTCTGTACCAATGCTTTTCTAGAAATTTTCTATTCTTGCTTTTGTATTTTAACATAACAGAAAAAATGTATTCATTCCTATTTTCTAACATTTTCATATTTGTTCTGACTATTTGCTTGCTCGAGAATTGTATACAGATACTCTTGAATCAAACGACATGCCTAATTGAGCTCCAGATTGTTTAAATAGAGTAATTAGAGGTTATCGTTTGCACAAGATAGTGTCTGTTGGGTGAAACGCACGAGCAACTATGGATTTTTGCAACAAATACGGAGATAGAGAAAAAA…
543	Chr01	17447641	16782864	CGTGAACACTAAATTCATGTAGTCATTCTTAAATTTAACAAGTCGAGTG	C	48	TAAGTAAAATGTGTTGATGTAGACTTGGAGCAAATTGTACACTGCAGGGTTAAGATATTTGTTTCATTTCTATTAAGAAATGGAATCCAGCTTTGCCCTTTAATTTGATTTCAAAAAACTGCATGGTTATTAGACTATGCCAATTGATTTCTTTCTCATAGTGCTCAAATAAATAGAAAAGCAAATCCTGCAGAATCTAATAATATAAATCATCACTCTTTGCTAGAGCAGCGTGCGCATGCTTCCAAAGCAAATGGGCCTATCGCTATTGAAGTTGATATTTTCCATTTCAACCACAAACGTGAGAAATTTGATTATGGATTTCTTCTTTGGTGTTAAGGCAAACCATCACCCATTGGCAGAGCAACGAGGGTATCCATCAAAATCCAAGATATTGCT…	AAATAAGTAAAATGTGTTGATGTAGACTTGGAGCAAATTGTACACTGCAGGGTTAAGATATTTGTTTCATTTCTATTAAGAAATGGAATCCAGCTTTGCCCTTTAATTTGATTTCAAAAAGCTGCATGGTTATTAGACTATGCCAATTGATTTCTTTCTCATAGTGCTCAAATAAATAGAAAAGCAAATCCTGCAGAAGCTAATAATATAAATCATCACTCTTTGCTAGAGCAGCGTGCGCATGCTTCCAAAGCAAATGGGCCTATCGCTATTGAAGTTGATATTTTCCATTTCAACCACAAACGTGAGAAATTTGATTATGGATTTCTTCTTTGGTGTTAAGGCAAACCATCACCCATTGACAGAGCAACGAGGGTATCCATCAAAATCCAAGATATT…
544	Chr01	17473949	16809084	G	GTCGTGCATGCGCCGAAAGGTGTCGTGCATGCGCCGAAAGGTA	42	ATAAGCATATGCAGATAATAAAATACCTCACGGTCATAGTTAGGGCACCTAAAAAAGCGCCTTCCTCGAATATCAGGATTCCTCGAAGCCATTAGTTGGCATCGATCACCGCATAGGCAGAGAGGACGCTGGCACCAAGGTGGTAGTAGGTATACACAAGGATCGCTACGCCAGTTCGAATCCTCAACACCCCGGCGTCTAGCCATTGACGAAAGCCGGTAGGATTTGTAATGAAGCAAGTAGGGAAGAGAGTACTGAATGTGACTGAGTTCTGAAAGATTGTGAGGCCTCACTCGTTAAGGCGACTTATATAGGCGCAAAAAATGAGTGATATCCCTGACATGTGAACGTGGAGGGGCATGGTTGGTACGCCTGATTGGGGCTGAAAGTTACATGCCT…	ATAAGCATATGCAGATAATAAAATACCTCACGGTCATAGTTAGGGCACCTAAAAAAGCGCCTTCCTCGAATATCAGGATTCCTTGAAGCCATTAGTTGGCATCGATCACCGCATAGGCAGAGAGGACGCTGGCACCAAGGTGGTAGTAGGTATACACAAGGATCGCTACGCCAGTTCGAATCCTCAACACCCCCGCGTCTAGCCATTGACGAAAGCCGGTAGGATTTGTAATGAAGCAAGTAGGGAAGAGAGTACTGAAAGTGACTGAGTTCTGAAAGATTGTGAGGCCTCACTCGTTAAGGCGACTTATATAGGCGCAAAAAATGAGTGATATCCCTGACATGTGAACGTGGAGGGGCATGGTTGGTACACCTGATTGGCGCCGAAAGTTACATGCCT…
545	Chr01	17474793	16809970	CATGGCCTGTGGAGCAGCTTCGGCTTTGCACAAAAGC	C	36	GGTGGAAGGCACCAAGTGGTCCGACGAGGTCCCAGCATGGTCCAGTGGTGGACCCTGACTCGACGTGCCGGCTACCTGTGACGAAGTCCCGGTGTACTGCCAGAACTGCACTGAGTGCGAGGTCGACGCAGCTGCCTGAGACGCTGACCATGCAGCCTGGGAGAAGTGGGCGGCCTGCGTCATAGCGAATTGGGCGAAACCTACACATCGACTAAGACGCTGACCATCGCATTTGCTGCAACACTTCACCCTGCCAGCCTCCGACTCATCCATATTGTTGTGGATGCGACGAGTCTTCCTCCTTACAGCCTTGCCTCGGAGCTTCGATGGGTCAGGAATATTGAGTACTTCATCGTTAGTCTATGTGAACTCCCCAGCTATGCCGAACCCATAAATCTC…	GGTGGAAGGCACCAAGTGGTCCGACGAGGTCCCAGCATGGTCCAGTGGTGGACCCTGACTCGACGTGCCGGCTACCTGTGACGAAGTCCCGGTGTACTGCCAGAACTGCGCTGAGTGCGAGGTCGACGCAGCTACCTGAGACACTGACCATGCAGCCTGGGAGAAGTGGGCGGCCTGCGTCATAGCGAATTGGGCGAAACCTACACATCGACTAAGACGCTGACCATCGCATTTGCTGCAACACTTCACCCTGCCAGCCTCCAACTCATCCATATTGTTGCGGATGCGACGAGTTTTCCTCCTTCCAGCCTTGCCTCGGAGCTTCGATGGGTCAGGAATATTGAGTACTTCATCGTTAGTCTATGTGAACTCCCCAGCTATGCCGAACCCATAAATCTC…
546	Chr01	17684051	16862739	G	GATAACTATGAAGTATCATAGCACAATAATATTTTTG	36	CGTACGTATTGATAAAAGCGAGGTATTAACCAGAGAATATTGTTCATGATTTCTTCATAAATTGCCTTTGTCAGCATTAATTAATTGTTTAATAATATTTTATCCCATTAGCTTTATGTTATATCATATATATATATATATATAAGTAATATCTATAAGCAATTATTTATAATCTTCTTTGTCATTTGAAAAGAAAGTAGATTTATTTTCTTTAGAAATAGATTTATTTTCTTTAGAAAAAATGTCAACGAAAGTAAATTAAGTGTAAAATAAAAATAAGGTGTTTTTAATTGTATAATATATTATCATAATCTCTTAAAAGATAAATTGGGTGGTACATGAAGCTCCACTAAATACATGGGTTTATATAGCCTAATATAATTGATATATTTTGAGAGG…	TGAATTTTTGGATACATTAATATAACTAGAAAGGAGCTCGTCCATCATGCGTACGTATTGATAAAAGCGAGGTATTAACCAGAGAATATTGTTCATGATTTCTTCATAAATTGCCTTTGTCAGCATTAATTAATTGTTTAATAATATTTTATCCCATTAGCTTTATATTGTATCATATATTTATATATATAAGTAATATCTATAAGCAATTATTTATAATCTTCTTTGTCATTTGAGATTTATTTTCTTTAGAAAATATGTCAACGAAAGTAAATTAAGTGTAAAATAAAAATAAGGTGTTTCTAATTGTATAATATATTATCATAATATGTTAAAATATGAAGCTCTACTAAATACATGGGTTTATATAGCCTAATATAATTGATATATTTTGAGAGG…
547	Chr01	17735211	16906236	AAACCTGCTCTCCCGATCGCCGATGCACGCCGGCCG	A	35	CTTAGCGTCGGTCATATGCATATATACCTCGACCAGACGATCGCCAAGAACGCTAAGAATGCATCCCACAAAGAGAGTAGTGGCTTCCTCGAATTGCTTCTGCTGATCAGCAGTAAGAATTTCTTCAGGTTTGCCAGTACTCACCCAGAAGCATTTCATAGCTGTCAGCCACAGAGTGACCCTGAGCTGCCATCTCTTAAAGTGCACACCGGTGAATTTATCCGGTCTCAGTGTATCAGCAAAACCAGCCATAGTAAAATCACAGCGCCTATAATAAGGTTTTTGGATTGTTAAAATTATAAGCACATAATGATTTAATTTATTCCATAAATAAATCATGACATTGTAGATGTAAACTAGATTGAACGCATCATTAGATCTACATATGTAAACTAAGCA…	CTTAGCGTCGGTCATATGCATATATACCTCGACCAGACGATCGCCAAGAACGCTAAGAATGCATCCCACAAAGAGAGTAGTGGCTTCCTCGAATTGCTTCTGCTGATCAGCAGTAAGAATTCCTTCAGGTTTGCCAGTACTCACCCAGAAGCATTTCATAGCTGTTAGCCACAGAGTGACCCTGAGCTGCCATCTCTTAAAGTGCACACCGGTGAATTTATCTGATCTCAGTGCATCGGCAAAACCAGCCATAGTAAAATCACAGCGCCTATAATAAGGTTTTTGGATTGTTAAAATATTAAGCACATAATGATTTAATTTATTCCATAAATAAATCATGACATTGTAGATGTAAACTAGATTGAACGCATCATTAGATCTACATATGTAAACTAAGCA…
548	Chr01	17804310	17023616	AACCCGCGACCTGACTGGCCTGTTGCCACCAGAATACTC	A	38	TTTGACTAGCAAACCCTCCGCTTGAGATGTTTCACCCTCTTTGTTCTTTCTCAACTGATCACGAGCCAGCAACACAGAAGTGATATATTTAGTTTTGATGGTATCCTTGCCATACGTTAAAGTAGTCACCACATGCTCATTCGATTCAGGTAACGAACACAAAAGAACTATGGCCTTGTCTTCATCGTCAACTTCCACATCCATCTTCACAAGATCTGTGACTAGTTGATTGAAAACGTTCACATGTGCTGTCAGATCCGCCCCTTCCTACATCAGGTCTCCTCCATCACATGGTACATGACCTAATATGAGAGACCGCCTGCAACTACATCTCCTCCCAATCGTCATCCTCCATCTTGGCCGGTTTGACACCCTTCAAAGCCTTTGAAACTCCTTATT…	TTTGACTAGCAAACCCTCCGCTTGAGATGTTTCACCCTCTTTGTTCTTTCTCATCTGATCACGAGCCAGCAACACAGAAGTGATATATCTAGTTTTGATGGTATCCTTGCCATACGTTAAAGTAGTCACCACATGCTCATTCGATTCAGGTAATGAACACAAAAGAACTATGGCCTTGTCTTCATCGTCAACTTCCACATCCATCTTCACAAGATCTGTGACTAGTTGATTGAAAACGTTCACATGTGCTGTCAGATCTGCCCCTTCCTACATCAGGTCTCCTCCATCACATGGTACATGACCTAATATGAGAGACCGCCTGCAACTACATCTCCTCCCAATCGTCATCCTCCATCTTGGCCGGTTTGACACCCTTCAAAGCCTTTGAAACTCCTTATT…
549	Chr01	17810649	17032890	ACCGTCATTGAGAGTGTATCCTGGACATCCACG	A	32	CCACCTCTACTGTCCAGCAGCATATATACACAATTAATGATATTTCATAGTCTAAGCACCATGCTTACATTACTAAATTCTACTCTATACCCGTGCACCCGACATAGAGCAACTGATAAATCAGACATTAAACCCGCACCATTACACCTCCAGTCTCTGGTAGGCTACCCACACAACTAATATAATATAGATATAAAGTAAGACCAGTACTCAGACTAAGCAAAGCACCGAAGATATATAAAGAAGAGTATTGCATTAATTCAGAAGGTATTACAGAAGGGATTACAAGAGTTGCTAGAGCCATACCAAAAACTCTTCCGAAGACTCCGAGGACTCTGAACACTATTCTTTACTACTCCACTTAGCACTATACAACTAATACTAATGTATGAAGAGGAA…	TTGGAATTTTGGAATTTTGGATGTAAGCGTTTGGAATTTTGGATAGAAATTCCGGGCGTGACACTTACATTACTAAATTCTACTCTATACCCGTGCACCCGACATAGAGCAACTAATAAATCAGACATTAAACCCGCACCATTACACCTCCAGTCTCCGGTAGGCTACCCACACAACTAATATAATATAGATATAAAGTAAGACCAGTACTCAGACTAAGCAAAGCACCGAAGATATATAAAGAAGAGTATTGCATTAATTCAGAAGGTATTACAGAAGGGATTACAAGAGCTGCTAGAGCTATACCAAAAACAATTCTGAAGACTTCGAGGACTCTGAACACTATTCTTTACTACTCCACTTAGCACTATACAACTAATACTAATGTATGAAGAGGAA…
550	Chr01	17812919	17035142	TGTGATTAAATAAATACGATATCTTAGATTACTTCTAG	T	37	TAGTGTGAGCGTGGTGCTTAGATTATTTGATACCATTAATTAGGGTTATATGCTACGGGTCAGTAGAGGTGGGCCGCTGATGGTGACAGCTTGGTACGGATATTCCTCCACAATAGTACATAATCCTAAGACACTTTCCTGGTATGGGTACTCCTCCGTATTCCTTACCGGTCAAATGGCCATGACGGGTTGCCATAAGGAACTTAGCAATCAGATATGGTCTCTCGAAACACTAGGAGGGCATAGTTAGGGGGTATTGGTTGCATGATTGTATACTAGCAAGTGTAAACTAAATTAACTATATAAAAGAAGTAGAGGAATGATTCTTTTCTTATTCTTTCTCCACTTAGCCTAGATTATATTTTAGTGAAGAGTACCTTGGTTTTTCTTCTGTGTGTC…	AGTGTGAGCATGGTGCTTAGATTATTTGATACCATTAATTAGGGTTATATGCTACGGGTCAGTAGAGGTGGGTCGCTGATGGTGACAGCTTGGTATGGATATTCCTCCACATTAGTACATAATCCTAAGACACTTTCCTGGTATGGGTACTCCTCCGTATTCCTTACCGGTCAAATGGCCATGACGGGTTACCATAAGGAACTCGGCAATCAGATATGGTCTCTCGAAACACTAGGAGGGCATAGTTAGGGGGTATGGGTTGCATGATTGTATACTAGCAAGTGTAAACTAAATTAACTATATAAAAGAAGTAGAGGAATGATTCTTTTCTTATTCTTTCTCCACTTAGCCTAGATTATATTTTAGTGAAGAGTACCTTGGTTTTTTCTTCTGTGTGTC…
551	Chr01	17846422	17110325	C	CCACCGAGCCTGCCGCCTCCACCGAGCCCGGCGT	33	TCTCATATCGGATCGAATTTTTTTCTAAGTCCCGCTACAGTTTCCTGCCTCCTTAGAACCCTAGCGCTGCTGTCGTCCTCCATCGTCGAGCCCGCCGCCGTCGCCACCGAGCCCGCCGCCACCGAGCCTCCTCCGCCCTCCATTCGGACCGCCGCCGCCTCCTCACCGACGACCCCCACCAAGCCTGGCGACATCCTTCGTCATCGTCGTCGCCTCCTCCTCTCCGACGCCCGACGCCGCCTCCACCGAGCACGCCGCCGCCTCCACCAACCCCAGCGACGCCCTCCACCGAGCCCGGCGCCGCCGCCATCGAGACTATCCGCCGCCGCCAACTCCTCCTTCGCCGACTCCTCCCTCGCCGAGCTCGAGGCCGCCGCCACCGAGCCTGCCGCCTCCACC…	AGTCCCGCTACAGTTTCCTGCCTCCTTAGAACCCTAGCGCTGCCGTCGTCCTCCATCGCCGAGCCCGCCGCCGTCGCCACCGAGCCCGCCGCCACCGAGCCTCCTCCGCCCTCCATTCGGACCGCCGCCGCCTCCTCACCAACAACCCCCACCAAGCCTGGCGACATCCTTCCTCATCGTCGTCGCCTCCTCCTCTCCGACGCCCGACGCCGCCTCCACCGAGCACGCCGCCGCCTCCACCGACCCCAGTGACGCCCTCCACCGAGCCCGGCGCCGCCACCATCGAGACTATCCGCCACCGGCAACTCCTCCTTCGCCGACTCCTCCCTCGCCGAGCTCAAGGCCGCCGCCACCGAGCCTGCCACCTCCACCGAGCCTCCGACGCCCGACGCCGCCTCC…
552	Chr01	17854747	17118699	ATGTCATTTACGAACTGGCCCTTCTGTCTCTGTGC	A	34	AGAACTTCTTAGAGCCATTGTCTAGGAGGTCTTTTGGTCCTCACCATTACCATATTCTCTCAGTTTGATCGTCGGAGTTGCTTGGTGGTCATCATCAGGTTGGAGCGAGGGACGAGTGGATCTCCTTTTCTCTCACCCTGTCCTTCAACTCAACCATTCTACGTGAGGACAACCGGAAGCTCGTCGATTATCTTCTGTGTGGAGTTGGTCTTTGGCAGGGTGTTTACAACCCCTTTGTAGGTATAGTGACATTTGGTCACACTTAGCTGTGGTCAGTTCGGTGCTAGCACCTTCTCCTGGGTTAAGCAAGGAGCTACAAACTTGTGGTTGTGGTGGTGTTTTTTCTTTTCCTGGTTAGAATCCCCAGGGTTGTAATTTTGTATTTTTCCTGCTATATCA…	AGAACTTCTTAGAGCCATTGTCTAGGAGGTCTTTTGGTCCTCACCATTACCATATTCTCTCAGTTTGATCGTCGGAGTTGCTTGGTGGTCATCATCAGGTTGGAGCGAGGGACGAGTGGATCTCTTTCTCTCTCACCTTGTCCTTCAACTCAACCATTCTACGTGAGGACAACCGGAAGCTCGTCGATTATCTTCTGTGTGGAGTTGGTCTTTGGCAGGGTGTTTACAACCCCTTTGTAGGTATAGTGACATTTGGTCACACTTAGCTGTGGTCGGTTCGGTGCTAGCACCTTCTCCTGGGTTAAGCAAGGAGCTACAAACTTGTGGTTGTGGTGGTGTTTTTTCTTTTCCTGGTTAGAATCCCCAGGGTTGTAATTTTGTATTTTTCCTGCTATATCA…
553	Chr01	17873278	17148914	A	AACCGGAAGTAAAGATATCTTTACTCCCGGTTGTTG	35	TGCCGCCGCGGCGGCGTGGCGCGGCCCGGCGTCGTGGCGCGGCGGCGCGGTGGCCCGGCTTCGTCGGCACTGCCGGCGCGACGTCGTCGCCGGTGGCTGCCGTATCGAGGTCGGGGTCGGCATCGTCGGCGCGGCGGAGTCGTGTTCGGCCGCGACGACGTCGGCGGCGGCGTCGGCAACGAGGCGGCCGGCGGCGGTTTGGGGAGAGAGAGAGAGAGATCAAGGTTGGAGAGAGAGGGAGGCGGCGGCGGCTCTCACCCTAGAGATGCGGCGGCGGCGGAGGTGGCAGAGGCGGCGGAGGCGGCGACGACGACGCCCGCGAGACAACGGCGAGATACGACGGCGGCGTCGGCGCGGGGATGCCCTAGGCAGTGGCGGCGAAGGAGAAGCCGAGAGAGA…	GCGGCGTCGTGGCGTCCTGGCGTCGTGCCGCCGCGGCGGCGTGGCGCGGCGGGCGTAGCGCGGCCCGGCTTCGTCGGCACTGCCGGCGCGACGTCGTCGCCGGTGGCGGCCGCATCGAGGTCGGGGTCGGCATCGTCGGCGCGGCGGAGTCGTGTTCGGCCGCGACGACGTTGGCGGCGGCGGCGGCAACGAGGCGGCCGGCGGCGGTTTGGGGAGAGAGAGAGAGAGAGATCGAGGTTGGAGAGAGAGAGGGAGGCGGCGGCGGCTCTCACCCCAGAGATGCGGCGGCGGAGGTGGCGGAGGCGGCGACGACGACGCCCGCGAGACAACGGCGAGATACGACGGCGGCATCGGCGCGGGGATGCCCTAGGCAGTGGCGGCGGAGGAGAAGCCGAGAGA…
554	Chr01	17911355	17199832	A	AACCTAATTAATCTATAATTAACACATGTTTAAT	33	TAAAGCCTATCTGGTTTGGGGTCGTAGCTGTCGCTGTCATTGGAGTTCTTCAGGGTCACGAAGACGTACAAAGGGAGAAGCTCATCACATCATGAATCGCAAAGCAAATCTTAAGGTAAGAAATTTGCAAGATTTTGCCCTCGATGTTCACTCGAATGTGTTTAGCAATTCTGTTTTATTTTCATGTGGCTCATGGCAATCGTCTTGAAGCCAAAATGTCTATTACTGCCTCCATTTCATATTAATATTAGTCGCTTTATAAATTTAGTCAAATTTTAAAAAAATGACTTATAATAAGAAACATGGAGTTTTTTTTTTGAATGAACAACATTTTGGAGTACGAAATGCACATACAAACATTTAGGTGGTGTTTGGATCCAGTGACTAAATTTTAGTCTA…	GCCTATCTGCTTTGGGGTCGTAGCTGTCGCTGTCATTGGAGTTCTTCAGGGTCACGAAGACGTACAAAGGGAGAAGCTCATCACATCATGAATCGCAAAGCAAATCTTAAGGTAAGAAATTTGCAAGATTTTGCCCTCGATGTTCACTCGAATGTGTTTAGCAATTCTGTTTTATTTTCATGTGGCTCATGGCAATCGTCTTGAAGCCAAAATGTCTATTACTGCCTCCATTTCATATTAATATTAGTCGCTTTATAAATTTAGTCAAATTTTTAAAAAAATGACTTATAATAAGAAACATGGAGTATTTTTTTTTTTGAATGAACAACATTTTGGAGTACGAAATGCACATACAAACATTTAGGTGGTGTTTGGATCAAGTGACTAAATTTTAGTCTA…
555	Chr01	17953533	17239462	GGCCTCGGGGTGCGACAGGATACCCCGAGCC	G	30	TTCAAGGGGATACCACATGCACCGCCTCTACACATCTCCTTCCTAGAGAGGGGCCCACATCAACCTGGGTCGAGCTACCGCCCATGCCTTAGGCCGAAAGTAAGGTGGCCGCTCGTCCTCAGGTGGGCCCCAGCGTCGTCCTTCGCCTGACACGGGGGACATCCCTGTCATTCCTTCATAAATTCCTGTAGACTTTTGTGGGTACATGCGCATGGGATGCACCGGTCGAACATCGATCCTCTGCCGTTGATGAGACGGGGCATACCTTGCCCCACGCCGCCTGACACAGGGTAGGACGTGGGTGCGATGCCGCCTGTCCCATCTGCCGGTGGCCGGTCAGAGCCCGGTCAAGGAAATTGATGCACGTCAATCACTGGGCGGCGCACGACCAGCCACACC…	ATAGTTCAAGGGGATACCACATGCACCGCCTCTACACATCTCCTTCCTAGAGAGGGGCCCACATCAACCTGGGTCGAGCTGCCGCCCATGCCTTAGGCCGAAAGTAAGGTGGCAGCTCGTTCTCAGGTAGGCCCCAGCGTCGTCCTTCGCCTGACACGGGGGACATCCCCTGTCATTCCTTCATAAATTCAGACTTTTGTGGGTACATGCGCATGGGATGCACCGGTTGAACATCGATCCTCTGCCGTTGATGGGACGGGCATACCTTGCCCCACGCCGCTTGACACAGGGTAGGACGTGGGTGCGATGCTGCCTGTCCCATCCGCCGGTGGCCGGTCAGAGCCCGGTCAAGGAAATTGATGCACGTCAATCACTGGGCGGCGCACGACCAGCCACACC…
557	Chr01	17980037	17279892	T	TTTTTCTTTCGCCAGAATATAATAATATGATATTTTGG	37	GCCCCTCTCGCCGGCCGCCACGCTCGTCGCCCGCGCCGGCCGCCGAGCTCGTCGCCTCTCTCACCGGCCGCCGAGCTCGTCGCCCCTCTCGCCGGCCGCTGCGCTCGTCGCCTCGCTCGTGTCGTGGTGGTGAGGGGTGACGCGAGTCACGCAACTCGCTTGCCCGGCTCGACCGAGCCTCGGGCGGTTGTATCCGGCCAAATCGGCCGGATCCCTCTATCCAGCATCTGGAGAGAATATTCCCCTCTGGGCCGCCCTATCCCACTCTCGCCCAGCATTCAAACACCCTCCAAAAAGCGGCGGCCTATCCGGGTATATCCCACCAACCAAACACACCCTATGTATATCAGCCATCGATGAAATATTAAGTTATATATGGTGAAATAAAAAGTAAACATT…	CCGCCTCCTCCCACCGCCGCGGCTCACCTCCTCCCGCCGCCGCCGCCACGCTCGTCACCCACGCCAGCCGCCGAGCTCGTCGCCCCTCTTGCCGGCCGCCACGCTCGTCGCCTCGCTCGTGTCGTGGTGGTGAGGGGTGACGCGAGTCATGCAACTCGCTTGCCCGGCTCGACCGAGCCTCGGGCGGTTGTATCCGGCCAAATCGGCCGGATCCCTCTATCCAGCATCTGGAGAGAATATTCCCCTCTGGGCCACCCTATCCCACTCTCGCCCAGCATCCAAACACCCTCCAAAAAGCAGCGGCCTATCCGGGTATATCCCACCAACCAAACACACCCTATGTATATCAGCCATCGATGAAATATTAAGTTATATATGGTGAAATAAAAAGTAAACATT…
558	Chr01	18012797	17312969	A	AATAGGGGTTTAAAAAAACAGGGGCAATATTACAAACCCTAAA	42	CCATTGGTTGGGGACGCTGATTTCATCTTCTTGATTGCGAATCGGGGATGGATGTGAATGTGATTTGCGGGTTTGTAGGCTGACTGGGAAGGTCGCCGTCATCACCGGCGGCGCCAGCGGCATCGGCAGGGCGACGGCGGAGGAGTTTATTGTCCCAAATAATGTGTTCTAATCATATGACGGAGATGCTGTACATATTGTCCCAAATAATGTGTTCTGTCATCTTTTTTAAATTGTGTCAAAATTATTGCTAAAATTCTGTCAAAACTATCCTAAATATAGTGTTCTGTCAACTTGTACAAAATTTGTCTAACATTTAGGTCCCATATTAAATACGCACAAATTTAACTTGAAACATGTCCGGTGTTCATGCCAAAATTATAGTAGAGGTATATTTGT…	CATTGGTTGGGGACGCTGATTTCATCTTCTTGATTGCGAATCGGGGATGGATGTGAATGTGATTTGCGGGTTTGTAGGCTGACTGGGAAGGTCGCCGTCATCACCGGCGGCGCCAGCGGCATCGGCAGGGCGACGGCGGAGGAGTTTATTGTCCCAAATAATGTGTTCTAATCATATGACGGAGATGCTGTACATATTGTCCCAAATAATGTGTTCTGTCATCTTTTTTAAATTGTGTCAAAATTATTGCTAAAATTCTGTCAAAACTATCCTAAATATAGTGTTCTGTCAACTTGTACAAAATTTGTCTAACATTTAGGTCCCATATTAAATACGCACAAATTTAACTTGAAACATGTCCGGTGTTCATGCCAAAATTATAGTAGGGGTATATTTGAC…
560	Chr01	18067398	17366998	G	GTATGTATGTATGTATGTATGTATGTATGTATGTATGTA	38	GATATTTCCCCTACCATGAATTTCTATATATTATTCTAATTACACAACTAATTAAGAGGTTCACTTCTTAATCACTACCTTGTGTTCGTGGGAGTCGTACCAGAAATTGAGCCCATTTGGTTGGCTTGATAGTTTCCAATAGTTGTTTCTACTAGTTTCTAAGCCTAGCTATGTCTTGCATGCATATACAATATACATATTGTCTTGTGGACAAAGAAAGCTAGCTAGGAGGCAGGAAAAGGAAGGAAACAAGCTACACACATGAGCTACCTTTTGTACATGTACCAAACAGATCTCCCAGGGTTTTGGTTAAACTCAAGGTTATGTGCTCAAGAAAAGAAAAAAAGAAACAGCATTCATAGCTAGTTCAAACTTGGCGCGAACTGATGACATGGGGTT…	ATATTAGAATTCTAATTACACAACTAATTAAGAGGTTCACTTCTTAATCACTACCTTGTGTTCGTGGGAGTCGTACCAGAAATTGAGCCCATTTGGTTGGCTTGATAGTTTCCAATAGTTGTTTCTACTAGTTTCTAAGCCTAGCTATGTCTTGCATGCATATACAATATACATATTGTCTTGTGGACAAAGAAAGCTAGCTAGGAGGCAGGAAAAGGAAGGAAACAAGCTACACACATGAGCTACCTTTTGTACATGTACCAAACAGATCTCCCAGGGTTTTGGTTAAACTCAAGGTTATGTGCTCAAGAAAAGAAAAAAAGAAACAGCATTCATAGCTAGTTCAAACTTGGCGCGAACTGATGACATGGGGTTGGCTGGACAGCACCGATGTCTAGA…
562	Chr01	18129178	17434497	T	TGTTAGGGGACGGAGGGAGTAGTATTACCTTAATTA	35	CTTAATGTCTGTAAACACTTGTGAAGAGCCTGTCTGACACTACAGACTGTTGTGTTTGAAGGGAACTTGTAGTTAGCAAATTAGAGTCATCCGCATCGTTTGTTCTATAGAATATAATGTTGATACTAATCATGTCTAGACTTGCAATGCACAAATTAAGAGCTGCTGATGCGTGTAAACAGTCTGATGTTCATTAGTCAAATTACCTTAAAAATGCCGGTGTCCAAACTTCTCTTACAAGTGCATCAGCTCTGTTAGTAAATACTCCCGTTCTTTAATATAAGGATTTTAATATTTTGTTCTTTAATATAAGGATTTTGATACTTTGTTTGCACTGTTTGATCATTTGTCAAATTAAAAAAAAAGAAATCATTATTTATTTTATTTATGATTTACTTA…	TGAAGAGCCTGTCTGACACTACAGACTGTTGTGTTTGAAGGGAACTTGTAGTTAGCAAATTAGAGTCATCCGCATCGTTTGTTCTATAGGATATAATGTTGATACTAATCATGTCTAGACTTGCAATGCACAAATTAAGAGCTGCTGATGCGTGTAAACAGTCTGATGTCCATTAGTCAAATTACCTTAAAAATGCCGGTGTCCAAACTTCTCTTACAAGTGCATCAGCTCTGTTAGTAAATACTCCCGTTCTTTAATATAAGGATTTTAATATGTTGTTCTTTAATATAAGGATTTCGATAAGGATTTCGATACTTTGTTTGCACTTTTTGATTATTTGTCAAATTAAAAAAAAAGAAATCATTATTTATTTTATTTATGATTTACTTATTATCTAAA…
563	Chr01	18129716	17435075	GTGCACTAGATTACACCCACTTAATAAGTTCA	G	31	GCAAAGAAGTAGACAGTTTTCTTTTAAGTAAATTGCATTGGTCATACATAAACTTGGTATATACGTGTAATTTAATATACAAATTTATAAAATAGTCGTTTCAGTACACTTACTTGTTTAGTTCTTGCGAATGAGAATCAAAATAACCTGGCAATATTAATTTATGTTAATTTTATGAAGCTGATGTTGATTAGGAATGTGACGTGCATACGTGTATAAAACATGTAATATTTATAAATCTGGTCTCTAGTGAATTTCATATATTTTTAACCCTTATATCATTGCTCGGTTTTTTTTAACCTTTTTTAACTATCACTATATCCTATTCTATTTTTTTTTATGAAAATGTGTATATCTAATATCAACCTTATCAAATTTATGTTTACATAGTATCCTAGT…	AGGAAAGTTTAAGCAAAGAAGTAGTAAGTTTTCTTTTAAGTAAATTGCATTGGTCATACACAAACTTGGTAGGTACGTGTAATTTAGTATATAAATTTATAAAATAGTCGTTTCAGTACACTTACTTGTTTAGTTCTTGCGAATGAGAATCAAAATAACCTGGCAATGTTAATTTTATGAAGCTGATGTTGATTAGGAATGTGACGTGCATACGTGTATAAAACATGTAATATTTATGAATCTGGTCTCTAGTGAATTTCATATATTTTTAACCTTATATTATTGCTCGGTTTTTTTTAACCTTTTTTAACTATCACTATATCCTATTCTATTTTTTTTATGAAAATGTGTATATCTAATATCAACCTTATCAAATTTATGTTTACATAGTATCCTAGT…
564	Chr01	18201251	17506787	TAAGAAAGTATTTGGTACATTAATGATCAGAGACCGT	T	36	CGGGGAGGGTCCGGGCCCCGGGCCGCCCGCGGCAGCGGTCCTCGTACATGGAGTACTGTCCTCCTGTATAAACAAAGAACTAGGCTAGCTACTTTATTCCTTTGTCTAACTCACTCTGGTTACTAATTGTTTGGCTGTTTGCTACTACCTTCGTTCTATTTTAAGTGTAGCCGTCTGTCTTATTTAGACAAATTATACTTTTTTTTTAAAAAGTCACACGTAATATTTTATAATAACGAACAAAGTAATAATCATAATTTTGTTAAAAATAAAACAAACGATCAAATATTGGACAAAAACAGAATTATTAGGGCATGTACAATGGTTTTTATTAACGGTCTCTCTTTATTGTCATGCAAACATATTTGGTGATATGGAAGAGAGAGAAAGAAGAAAAGA…	CGGGGATGGTCCGGGCCCCGGGCCGCCCGCGGCTGCGGTCCTCGTACATGGAGTACTGTCCTCCTGTATAAACAAAGAACTAGGCTAGCTACTTTATTCCTTTGTCTAACTCACTCTGGTTACTAATTGTTTGGCTGTTTGCTACTACCTTCATCCTATTTTAAGTGTAGCCGTCTGTCTTATTTAGACAAATTATACTTTTTTTAAAAAAAGTCACACGTAATGTTTTATAATAACGAACAAAGTAATAATCATAATTTTGTTAAAAATAAAACAAACGATCAAATGTTGGACAAAAACAGAATTATTAGGGCATGTACAATGGTTTTTATTAACGGTCTCTCTTTATTATCATGCAAACATATTTGGTGATGTGGAAGAGAGAGAAAGAAGAAAAGA…
565	Chr01	18219730	17518544	C	CTGGCCTATTGCGCCTAGCCCGCCGGCCGCCACT	33	TGCCCTCACCAACGACATGTATAGTGTGATTTCGGAGAGCGAGATGGGTGCGGGCGGATGATGGTGGCGAGAGAGAGATGGATGGATGTGGCGGCAATGACGACGACGATGATGACAACATGCTGATGGATGCGACGCTCCGTGTCGGGCTTGTGGCACCTAGGTGGCGACTTGGATGGAAACGGCGCTCCACGTCGAACTCAAGGCAGAGAGGGAGGGGAGTGGAGGGGAAGAGCAGTGACGACGGCTGCATCCCTTCACACAGCGGCGATAGAGCGAAGGGTTTGGAAGCTGGGGGAACTCGACAACTCGACTTAGGCTGAGGCAGAGGTGGCAGAACGAAGAGGATATGGACGGGGCGGCGGCGAGTCTCTATGGCAGCCATCGTGTTCCTCAGTC…	ACGCTGCCCTCACCAACGACATGTATAGTGTGATTTCGGAGAGCGAGATGGGTGCGGGCGGATGATGGTGGCAAGAGAGAGATGGATGTGGCGGCGACGACGACGACGATGATGACAACATGCTGATGGATGCGACGCTCCGTGTCGGGCTCGTGGCACCTAGGTGGCGACTTGGATGGAAACGGCGCTCCACGTCGAACTCAAGGCAGAGAGGGAGGGGAGTGGAGGGGAAGAGCAGTGACGACGGCTGCATCCCTTCACACGGCGGCGATAGAGCGAAGGGTTTGGAAGCTGGGGAAACTCGACAACTCGACTTAGGCTGAGGCAGAGGTGGCAGAACGAAGAGGATATGGATGGGGCGGCGGCGAGTCTCTATGGCAGCCGTCGTGCTCCTCAGTC…
566	Chr01	18249944	17612659	C	CGAGGAGGGTAGTAGGGTTGGCGGCCACTTGCAGT	34	ATGGGCATGGGCAACACCGAAAGGACGAGGACGGGGGCAACGAGAGGACGGATCCTTACCACCATGCAACGAGGCGCGAAACGACGACGACGAGCGGGCGCGGTTGAGACGGCTCGGGGACGGCGGAGACGAACGGCGAGGGGACTACTTCGGCGGCGATCCTTGGACGAAGACGAGACGAGGCCGGCACAAGGCTTGACGACGCGGAGCCGAGGACGAAGACGACGACGGGGCTGCAGCGGCTTACTTGACGGACGCAGACGACGAACGAGCACGGCTTGACGAAGGGAGGGCCGACGACGAGCGCAACCGGGAACGACGAGAGGACGACGACAAAGACCGGCGGGGTTCGGATGGAGGGGAGGCGAGGCCGAGGACGACCTTGCCGCTGTGATGCTG…	ATGGGCATGGGCAACACCGAAAGGACGAGGACGGGGGCAGCGAGAGGACGGATCCTTACCACCATGCAACGAGGCGCGAAACGACGACGACGAGCGGGCGCGGTTGAGACGGCTCGGGGACGGCGGAGACGAATGGCGAGGGGACTACTTCGGCGGCGATCCTTGGACGAAGACGAGACGAGGTCGGCACAAGGCTTGACGACGCGGAGCCGAGGACGAAGACGACGACGGGGCTGCAGCGGCTCACTTGACGGACGCGGACGATGAACGAGCACGGCTTGACGAAGGGAGGGCCGACGACGAGCGCAACCGGGAACGACGAGAGGACGACGACAAAGACCGGCGGGGTTCGGATGGAGGGGAGGCGAGGCCGAGGACGACCTTGCCGCTGTGATGCCG…
567	Chr01	18257102	17626127	A	ACACGATACATTACTGCGAAATTTATAGGTTGTTAC	35	TTGCTGAGTATGTCATATACTCACCTTTCAATCATTCATCAGAGGAGGAGTTCTACAGTGATGCCGAAGGTGTGGATGATTAGGCATAGCCCTGGTCGAGCTGCTTGTGGGATGGAGTCGTCTGCGCCGTTTATCTTATTTTCCGCTGCTTAGATCTTTATTGTTTGAGAGGAACTATCTACCTCTGTAATGACATTATATTCGCTTATTAATTAGAGTAATAATTATACTCTATTATCAATTTGTTATTGTGTGCCTCGGCTGATTCCTGGACGAGGGTTTACACACATGTAAGCGTTTGGAATTTTGGATAGAAATTCCGGGCGTGACAGGCAAGCTCTCCTAACCAATTCACCATATGATATTATATGAATAGAGAACATTATTTGTATGCTTTGT…	TTGCTGAGTATGTCATATACTCACCTTGCAATCATTCATCAGAGGAGGAGTTCTACAGTGATGCCGAAGGTGTGGATGATTAGGCGTAGCCCTGGTCGAGCTGCTTGTGAGATGGAGTCGTCTGCGCCGTTTATCTTATTTTCCGCTGCTTAGATCTTTATTGTTTGAGAGGAACTATCTACCTCTGTAATGACATTATATTCGCTTATTAATTAGAGTAATAATTATACTCTATTATCAATTTGTTATTGTGTGCCTCGGCTGATTCCTAAACGAGGGTTTACACACATGTAAGCGTTTGGAATTTTGGATAGAAATTCCGGGCGTGACAGGCAAGCTCTCCTAACCAATTCACCATATGATATTATATGAATAGAGAACATTATTTGTATGCTTTGT…
568	Chr01	18306866	17658063	AAAGGAATTAACAAGCATACACTAAATTTATCTCATAACAAAAAG	A	44	TTCGTTCTGTAAGGTGTACAGACATGTGATGCACTTCAAGGACCAAAATAATGAAAAAAAAGACATTATCTTCTTGACTAGAAAAAAAAAGTTCTTATGATAAATGGAAGACCCACCTTTTCATGCCAAGGTTCCAAAATACTGTGCCAAAAAGCAGTGCAATGACAGTAGTAACAAAAAATCTACGTCCAGTGTAATGAATATTCCTCCAATACAACAAATTTTGCTTCTACAAGCATATTAGGCATTGCTTGAAGAAAGTCTGTGAATATTTATTGGGGAAAAGGAGATCACCAGAGTTAGCAGGAGCCCTGCTTATTTCTTCTATCAAGGCCTTGTTTCTCCTAAAACCATAAATACAGCTTATATCATATTAGTATTGCACATCTTAAAAATACA…	TTCGTTCTGTAAGGTGTAGAGACATGTGATGCACTTCAAGGACCAAAATAATGAAAAAAAAGACATTATCTTCTTGACTAGAAAAAAAAAGTTCTTATGATAAATGGAAGACCCACCTTTTCATGCCAAGGTTCCAAAATACTGTGCCAAAAAGCAGTGCAATGACAGTAGTAACAAAAAATCTACGTCCAGTGTAATGAATATTCCTCCAATACAACAAATTTTGCTTCCACAAGCATATTAGGCATTGCTTGAGGAAATTCTGTGAATATTTATTGGGGAAAAGGAGATCACCAGAGTTAGCAGGAGCCCTGCTTATTTCTTCTATCAAGGCCTTGTTTCTCCTAAAACCATAAATACAGCTTATATCATATTAGTATTGCACATCTTAAAAATACA…
569	Chr01	18336330	17671723	ACAAGCCACGTCACAAGGATCACCCCGGCGTC	A	31	GGGTGCAACCCTGTAAGTCGGCGCAGACACTTCTCTTGCAGAATGGAAAACGTATCCAAATGTTCAAATAAACGCAGTTGACCTACAGGTCTTAATTTTAAGAAGAATCTCATCAATATTAATTAACATGGGTAAAAGGACAAGGAGAGCATCTACCAGACAGCATCTACATGGTGTGAAATCCATGCAATAATTATTTTTTTCGCTGGGCCGGCGAAAGCCGGCCGGGGTATATATTAAGAAAGAGAGAGTTTAAGCAAACTGTACATGCAAGAAAACAAACAGAGCCAAAGCTCACATACAGAACCAGGAGACTGGCTCACCACATACACACGCGCTAGCTAGCTAGCCGATCCCAGCAACCGGAGGGCCACTCGCACTGATCGCGCATAGAAGCCC…	GACACATTGCATGTAGATTTTGGAGGAAATTTAGCAAGAGCTTCAACCTCTTGGAAAAATTCCTTTGAGTCTATCTCTCTCATCCGATTCCTGCGTTTTTCCTGCGCTCCAATCAAACGACCATTCCTGTGTTTTTCATGTGTTTTTCAATCCTCTGTTTTACACTTTAATTTCTGTCAGAATCCTATGTTTTTCCTATTCCTCCGTTTTTTCTACCCTGCGATTCAAAGGGGCCCTAAGAAAGAGAGAGTTTAAGCAAACTGTACATGCAAGAAAACAAACAGAGCCAAAGCTCACATACAGAACCAGGAGACTGGTTCACCACATTACACACGCGCTAGCTAGCTAGCCGATCCCAGCAACCGGAGGGCCACTCGCACTGATCGCGCATAGAAGCCC…
[truncated: 7,470 more rows]

## Sheet: MH63 Nipponbare 30-55 bp InDels
InDel NO.	Chromosome	Nip Position	MH63 Position	NIP Ref	MH63 Query	InDel size	Nip Sequence	MH63 Sequence
[truncated: 8,092 more rows]
