# Supplementary material for: Development of Whole-Genome Agarose-Resolvable LInDel Markers in Rice
Source: Rice (N Y). 2020 Jan 6;13:1. doi: 10.1186/s12284-019-0361-3 (PMC6944724; doi:10.1186/s12284-019-0361-3)
Supplement: Supplementary file 6 — Additional file 6. The 4744 unique LInDel markers designed by the 30-55 bp LInDels [file 12284_2019_361_MOESM6_ESM.xlsx]

## Sheet: 4744 LInDel markers
InDel NO.	Marker Name	Chromosome	Nip Position	ZS97 Position	MH63 Position	InDel from	Forward primer	Reverse primer	Forward primer size	Reverse primer size	PRIMER_LEFT_TM	PRIMER_RIGHT_TM	PRIMER_LEFT_GC_PERCENT	PRIMER_RIGHT_GC_PERCENT	PRIMER_PRODUCT_SIZE
1	LInD1-266	Chr01	175051	131161		Nip./ZS97	TGTGATGGATTGACACACACACA	TGTTTGCTTTCGCTTCTTGGCT	23	22	60.684	61.844	43.478	45.455	301
2	LInD1-267	Chr01	227648	191159		Nip./ZS97	CGGTGACCCACAGGATCTACTG	ATACGTACAGGGTGGGATTGGC	22	22	62.104	62.133	59.091	54.545	345
3	LInD1-268	Chr01	240782	204478		Nip./ZS97	CGATCACCCTGAAGCAGCTAGA	TGACGTGGATCCCCTCACATTC	22	22	61.849	62.059	54.545	54.545	346
4	LInD1-269	Chr01	301921	282006		Nip./ZS97	TCCTGCTTCATCGACGCATGTA	TCTTTGCCCCTGCTCAGTGTAA	22	22	62.098	61.884	50	50	328
5	LInD1-270	Chr01	312576	292676		Nip./ZS97	ACCAACCAAAATACAGTAAGGACCA	TCCCTACCATACAACTAACACGCA	25	24	60.399	61.596	40	45.833	344
6	LInD1-271	Chr01	327581	309685		Nip./ZS97	GACTCTGCAACCAAACCATGCA	AACAAGACGGTGAACATACGGC	22	22	61.909	61.438	50	50	300
7	LInD1-272	Chr01	375417	357588		Nip./ZS97	CGCCCTTCGACAAAAACAAACC	ATGCCATGCTGTAGCCATGAGA	22	22	61.36	62.145	50	50	327
8	LInD1-273	Chr01	389974		342705	Nip./MH63	AAATGTGCAGAGAGGGGAGGAC	GGCCGGCCGATCATCTAATCTA	22	22	62.013	61.789	54.545	54.545	316
9	LInD1-274	Chr01	409050	387708		Nip./ZS97	ACTCGTCAATGGATTGCTGCTT	TCCATTTCCATTTCGACCCCCT	22	22	60.877	61.705	45.455	50	325
10	LInD1-275	Chr01	479655	448245		Nip./ZS97	CCCTCGAACGACTTGAGCTACA	TCGTCGGTTAGTGTTGTGCTCT	22	22	62.024	61.903	54.545	50	302
11	LInD1-276	Chr01	548874		501505	Nip./MH63	CGCACAGTGTAAAATCGCCC	GTGGAGACGTGGAGAGGTGAAG	20	22	61.247	62.285	50	59.091	350
12	LInD1-277	Chr01	549687	541643		Nip./ZS97	GGAGGTCTTCATGGGGAACGTT	CCAGCGACAACAACATCATG	22	20	62.267	62.269	54.545	50	327
13	LInD1-278	Chr01	558483		511113	Nip./MH63	TCTTCAGAAGAAAAGAACACCACCT	GCTTCTGCTTCCTTCTTCGTCA	25	22	60.339	60.868	40	50	349
14	LInD1-279	Chr01	563953	555788	516556	both	TGCTAGCTCAGAGACACAGTGC	GATGTGTTCCTCTGGTTGCAGG	22	22	62.288	61.454	54.545	54.545	323
15	LInD1-280	Chr01	604254		555532	Nip./MH63	GGCCAGAACTCATCAGTAGCCA	GGTCACCATGCTAGAAAAGG	22	20	62.064	61.826	54.545	54.545	300
16	LInD1-281	Chr01	727726	683209		Nip./ZS97	TGGTTCGTAGCAATCTCGCTCA	AATTTCGTAGTCGAGGCACGGA	22	22	62.033	62.03	50	50	336
17	LInD1-282	Chr01	738132		580664	Nip./MH63	AAGCCCAACACACTATCCCGTT	TTTTTGTCGGTGCCACTTCCAG	22	22	62.212	61.84	50	50	308
18	LInD1-283	Chr01	1361110	1234918		Nip./ZS97	TACTCCGGCGAAACGTTGTAGT	ACAGCCAGACAGCAAAGGTACA	22	22	61.961	62.137	50	50	316
19	LInD1-284	Chr01	1420768	1285306		Nip./ZS97	AGGGCATGCCTAACAACTCAGA	AAAACGGAGCAACGGATTAGCG	22	22	61.69	62.062	50	50	317
20	LInD1-285	Chr01	1517597	1371791		Nip./ZS97	ACTGCGAGACGAATTTATTAAGCCT	AGCGACAAGTAATATGGGATGGAGA	25	25	60.911	61.454	40	44	332
21	LInD1-286	Chr01	1551259		1374209	Nip./MH63	ATGCATATGGCCTAGCTGCAG	GCTTTGACAGATTGCCCTGACC	21	22	61.948	62.031	50	54.545	350
22	LInD1-287	Chr01	1606097		1414044	Nip./MH63	TTGCAACGTTTGACCACTCGTC	TAAACTGGTAGCCTTTCGCC	22	20	62.121	62.245	50	50	330
23	LInD1-288	Chr01	1660281	1507552		Nip./ZS97	TGCGCTAAACCTCTCGCTGTAA	GCTAGGTCATTTTCCCCCTC	22	20	62.286	62.072	50	54.545	349
24	LInD1-289	Chr01	1695631	1542826	1497142	both	AGGGGTGATGTGTGTTTGGTGA	ATTGTGCTCGCGTGAATCGATC	22	22	62.092	61.922	50	50	341
25	LInD1-290	Chr01	1753063		1554796	Nip./MH63	AGGCACACACATGAGGAGGATG	GACCAATGACTGAAGCGATCGA	22	22	62.33	60.735	54.545	50	350
26	LInD1-291	Chr01	1794977	1642522		Nip./ZS97	GTTGTTGTGTGTGAATTGTGTTGGT	CGGCGCCGTACATACACTATTT	25	22	61.303	61.114	40	50	345
27	LInD1-292	Chr01	1803748		1605209	Nip./MH63	TGTGCTCGTCTTCCTCGTTGAT	CCGTTGCCTCTCCTCTACACAA	22	22	61.972	61.983	50	54.545	336
28	LInD1-293	Chr01	1842524	1724615		Nip./ZS97	TCACGACGTCAGGCATTCAGAT	GAAGCAGCGCTATTGTCTTGCA	22	22	62.038	62.07	50	50	305
29	LInD1-294	Chr01	1883686	1769021		Nip./ZS97	TCTACTCCAGCTTCGAACTGCT	GCCAATTTGGGTTCGGTTGGAT	22	22	61.142	61.992	50	50	339
30	LInD1-295	Chr01	1894833	1780120	1723516	both	GTGTTTGCTTATGGATCGGCGA	TCGGCCTGATGCATGTAGAACA	22	22	61.567	62.058	50	50	300
31	LInD1-296	Chr01	1929303	1805561	1748959	both	TGCGGCGACATCCTTCTTATCT	TGAACTCACCGGTGCTGAGTAA	22	22	61.855	61.6	50	50	303
32	LInD1-297	Chr01	2022604	1981822	1927673	both	GTTGGCCATTCTCGATTAGCCG	GCTGCCATGTCAAGAGGAAACC	22	22	61.942	62.031	54.545	54.545	322
33	LInD1-298	Chr01	2102771		1996901	Nip./MH63	GAATGATAGTGGCGCAGTGAGC	TCTCTCTCTCGTTCCCCTCCAA	22	22	61.936	61.963	54.545	54.545	335
34	LInD1-299	Chr01	2154040		2056197	Nip./MH63	TGCTGGCTTGCACGAATCAAAT	GACTTGGAGTGGCCTTGTAGCT	22	22	61.974	62.26	45.455	54.545	332
35	LInD1-300	Chr01	2155370	2103201	2057472	both	CATATATATCACCCCGGCGCCT	GCTCACATGTAGCTAGCACACT	22	22	61.865	60.418	54.545	50	342
36	LInD1-301	Chr01	2174783		2076784	Nip./MH63	TTGGGGTCCTTGTCGTATGCTT	AAAAGACGACCGACATGGAGGT	22	22	61.947	61.928	50	50	310
37	LInD1-302	Chr01	2247020	2195203	2129062	both	CTTGTGAGGGTGGGAAAGTTGC	TTGGGAGAACGTGACAAGGTCA	22	22	61.91	61.804	54.545	50	339
38	LInD1-303	Chr01	2577172		2414016	Nip./MH63	CTTTGTCTTGAGAGCGAGCTGC	AGGAAGAGGAAAGCAACCGTGA	22	22	62.054	61.875	54.545	50	339
39	LInD1-304	Chr01	2579272	2498952		Nip./ZS97	TCTTATATGGGCCGCTCGATGG	ATGCCACCTAAGCGTCACATCA	22	22	62.048	62.319	54.545	50	300
40	LInD1-305	Chr01	2658460		2507859	Nip./MH63	CCACCCCTCCAAACCTTGATCT	TTGTGGCGATTTGGGACCTAGA	22	22	61.967	61.683	54.545	50	318
41	LInD1-306	Chr01	2668185		2517692	Nip./MH63	GGGCTTGAGTTTGCTTGAGACC	TGATTTAGCTCCCTTCCACCGT	22	22	61.966	61.422	54.545	50	328
42	LInD1-307	Chr01	2702759	2648443		Nip./ZS97	CTCTAGTGCACGCTCGCATTTC	AGGGAAAAGGCAGTGGTGGTAA	22	22	62.161	61.837	54.545	50	326
43	LInD1-308	Chr01	2741203		2600838	Nip./MH63	TGTGCACTCAAAATACCCGGTG	GGGCCTAATGCTGACGATAGGT	22	22	61.39	61.932	50	54.545	322
44	LInD1-309	Chr01	2797589		2657851	Nip./MH63	TCTAACCTAGGTGAGCCCCTGT	TGCCATGTGAGGAGCTTCATCA	22	22	61.985	62.011	54.545	50	325
45	LInD1-310	Chr01	2862743	2794982	2731170	both	ACGAGTGCAAATCAATGGGCAA	ATGCCTACATCGCCCTCACTAC	22	22	61.659	61.921	45.455	54.545	338
46	LInD1-311	Chr01	2879435	2812100	2748039	both	GCGGCTAATCGAATTCTTGGCA	CCTCGTATCTCTGCTCATCACTGT	22	24	61.886	61.756	50	50	321
47	LInD1-312	Chr01	2959021	2879876	2815820	both	AGCGGGTGATACAGAGTGCAAT	GGCTTCGTCCATCACTTTTGCA	22	22	62.064	61.961	50	50	336
48	LInD1-313	Chr01	2988901	2910927	2846901	both	GACCTACGTACAGCCTCGTGTT	CTCGTTCCTCTCTACCCACAGC	22	22	62.02	62.094	54.545	59.091	319
49	LInD1-314	Chr01	3027971	2931295	2867265	both	CGGGCGATGCAAAGTATTAC	GGCCGTGTCCCAAATTTGAT	20	20	62.238	61.722	54.545	50	322
50	LInD1-315	Chr01	3394190	3260699	3195128	both	TGTGGGTCTTGCTACCTGAGTG	GGTCTTTGTCTCATGCGGCATT	22	22	61.931	61.773	54.545	50	316
51	LInD1-316	Chr01	3505925	3373048		Nip./ZS97	ATCACCATCCTCCTCCTCCTCC	GGGGAAAACCTAAACGCGCAA	22	21	62.452	62.016	59.091	52.381	340
52	LInD1-317	Chr01	3530682	3404617		Nip./ZS97	AGACACACACAACAAACCTCAACA	GCCGACACTCTTGACTCCTGAT	24	22	61.285	62.043	41.667	54.545	322
53	LInD1-318	Chr01	3537210		3337816	Nip./MH63	ACATGCCAGATAATGTCCCCGT	ACGGACTCTCTTTATTGTCATGCA	22	24	61.821	60.323	50	41.667	339
54	LInD1-319	Chr01	3541498		3346018	Nip./MH63	AAGCAGAGGTCTAGTGCTGTCG	ATGCACCACGCTACAGTACCAT	22	22	62.032	62.059	54.545	50	348
55	LInD1-320	Chr01	3553604	3427558		Nip./ZS97	CGTACGTACTTTACTACCATCCAGG	TCGAGGCTAAAACAATGCAAACGT	25	24	60.505	62.037	48	41.667	310
56	LInD1-321	Chr01	3554837	3428829		Nip./ZS97	GGGTAAACGTACGTGTACAGAGC	CCTGTTTCTACATGTTGTAAGGTGC	23	25	61.212	60.335	52.174	44	303
57	LInD1-322	Chr01	3564718	3438748		Nip./ZS97	TGATCTGCCAGCAACTGTAGCA	CACAGGTGTGCAGATTCATAGCT	22	23	62.257	60.93	50	47.826	315
58	LInD1-323	Chr01	3584104		3388942	Nip./MH63	TGCCCCCATATAGATGCATGCT	ATCTCTTCTCCAGTGCAAGCGT	22	22	61.702	61.991	50	50	332
59	LInD1-324	Chr01	3593722		3402806	Nip./MH63	GCAAGGCACCTAAGTAGACCGA	ACAAGATGGCAATTGGTCACTGT	22	23	62.045	61.005	54.545	43.478	335
60	LInD1-325	Chr01	3636491	3509634		Nip./ZS97	CCAACTTTCACCAAACTTCTCCCC	GGGGGAGTTTGATGTGACGGAA	24	22	62.005	62.523	50	54.545	336
61	LInD1-326	Chr01	3746856	3618878	3559479	both	AGGTATCCGGTATTGCGGTTCA	TGAGTGGCTTGAGTTGAGTGCT	22	22	61.542	62.13	50	50	347
62	LInD1-327	Chr01	3763330		3573747	Nip./MH63	CATCGCTGGGCAGGCTCTATAT	AGTCCCGGTTGGTGTTACCTAC	22	22	62.057	61.672	54.545	54.545	340
63	LInD1-328	Chr01	3781056	3663315		Nip./ZS97	AACTCAGTAGGTGCAGTTGGCT	GGGTGGCACTGTGGTAGTAACA	22	22	61.879	62.195	50	54.545	308
64	LInD1-329	Chr01	3819733	3702875	3643523	both	CGCGGCGAGGAAGAAGAGAT	AGTAGCACGACGATTAGAAAGGTT	20	24	62.343	60.082	60	41.667	350
65	LInD1-330	Chr01	3886464	3774476	3703126	both	AACACCCAAGAAATGCTCGCAG	CCAAAAACTCACCAGCCACACA	22	22	61.965	61.787	50	50	302
66	LInD1-331	Chr01	3942930	3823999	3752649	both	GGCGGCCAAGGTTGATTTGAAT	AACCATGTTTGTTTCAGGGCCC	22	22	62.307	61.874	50	50	340
67	LInD1-332	Chr01	3997559	3879499	3808139	both	TTGCAGTTTTCACGTCAGCTGT	AGCAGTGCTTATCAGTGGCAGA	22	22	61.513	62.001	45.455	50	340
68	LInD1-333	Chr01	4017230	3900141	3828770	both	CGCGATCAAGTAATCCAACCGG	CTTTGTGGCTACCAACCAGCAC	22	22	61.928	62.218	54.545	54.545	319
69	LInD1-334	Chr01	4115549	3997498	3926114	both	TGGATTGCTGCCTAACCCAACT	GCGTAAGGCTAAACAAAAGGACCT	22	24	62.227	61.577	50	45.833	300
70	LInD1-335	Chr01	4119296	4001296	3929912	both	TTGCCAATTAGTTCAGCTGCCG	TACCCCATCCTGACTACCCACA	22	22	62.026	61.99	50	54.545	346
71	LInD1-336	Chr01	4265010	4136495	4072166	both	CAGACGCAGAATCAGAGGGAGT	AATGTGCAAATAGTGTGGCTCAC	22	23	61.787	60.057	54.545	43.478	301
72	LInD1-337	Chr01	4340348	4216432	4147370	both	TGAGCGGGCATGTTTCTCAAAC	AAGGATCGAGCCACGTACATCC	22	22	61.961	62.166	50	54.545	312
73	LInD1-338	Chr01	4342375	4218518	4149456	both	GCCAATTCAAACGGCCGTATTT	CAACTTCGCCTCATCGTTGCAA	22	22	60.673	62.254	45.455	50	338
74	LInD1-339	Chr01	4377557	4246372	4177331	both	TAGATGTTCGGTTGCCTGTCCC	GTCAACCCATCGAACTAACTACTGT	22	25	62.316	60.566	54.545	44	349
75	LInD1-340	Chr01	4393912	4262769	4193718	both	CCAAACCAAACTCCTCACGAGC	AGAGGAGGCGAGAGGTGAGTTA	22	22	61.952	62.021	54.545	54.545	314
76	LInD1-341	Chr01	4409337	4278546	4209508	both	TGCATGGTCAAAATTGCCACTGT	TAGACGAAAGGAGTAGGCTGCC	23	22	62.068	61.53	43.478	54.545	324
77	LInD1-342	Chr01	4410984	4280220	4211184	both	AACCATCGTCACATTGCACACC	ATGCAAAACGACTCCAAGCCTG	22	22	61.961	61.965	50	50	332
78	LInD1-343	Chr01	4411917	4281100	4212026	both	CAACGCCGACTAAAGACCACAG	TTGAACAACCCCTGAGACGTTT	22	22	61.74	60.356	54.545	45.455	324
79	LInD1-344	Chr01	4435354	4304241	4235663	both	CTACTCACAGTTGCGCTTCCAC	ACCGACTACTGGTTGTCATGCA	22	22	61.744	61.927	54.545	50	340
80	LInD1-345	Chr01	4570393	4402540	4324550	both	ACTTGACCCGTGTTGGTTTTCC	ACAAGAGCACATGCACATCAACT	22	23	61.526	61.308	50	43.478	343
81	LInD1-346	Chr01	4588544	4420406	4356059	both	GTACAGGGAGCGTCACCAGTAG	ACACATCGCAACACTAACGCTC	22	22	62.089	61.74	59.091	50	336
82	LInD1-347	Chr01	4636842		4391614	Nip./MH63	GCCGACTCAATGCCAACTTGAT	AGTAATTGTGTTGCACGAGGCC	22	22	61.773	61.705	50	50	305
83	LInD1-348	Chr01	4657800	4471964		Nip./ZS97	TCCTCCTTATCAATCAGCTCGCA	CACTAGCTTCACTGCATGTGCC	23	22	61.507	62.074	47.826	54.545	338
84	LInD1-349	Chr01	4688890	4502751		Nip./ZS97	TGACGAGTGAGGAATTTGGTCGA	TAAAGAGCCTGAAGGGAGTGCC	23	22	61.866	62.009	47.826	54.545	329
85	LInD1-350	Chr01	4822935	4624226	4561270	both	TCAGAGCAAGAAAGGCGAGA	CAGAACAAGAAGAGCACGAC	20	20	62.554	62.284	54.545	54.545	322
86	LInD1-351	Chr01	4832291	4633531		Nip./ZS97	TTGGGACGGAGAAAGTACTGCA	TGCAGCACGGATTTCAAGACAC	22	22	61.608	61.951	50	50	300
87	LInD1-352	Chr01	5229193		4621173	Nip./MH63	TCAGGAGATTCAAACACCATCGTG	ATTCGTCTCGCGGTTTACATGC	24	22	61.098	61.864	45.833	50	326
88	LInD1-353	Chr01	5243278	5064540	4635262	both	CCCCATTATGCTTGTGCTGACC	CACGCATGCATGAATCTGTGCT	22	22	61.848	62.391	54.545	50	346
89	LInD1-354	Chr01	5270165		4692339	Nip./MH63	TCCCCCAGAACAAAACTCTCTCA	TCTATCGTCGTCTTGTGGGTGT	23	22	61.209	61.138	47.826	50	340
90	LInD1-355	Chr01	5306379	5137370		Nip./ZS97	GCAGTTGATTCAGGGCTGTTTG	TGCTGAGGTGGTGTTTGGATCT	22	22	60.609	61.888	50	50	350
91	LInD1-356	Chr01	5318069	5149371		Nip./ZS97	TGCTTCACAAAACCATAACCCTCA	GAGTCGCTCGGGACTTTTGTTG	24	22	60.933	61.992	41.667	54.545	322
92	LInD1-357	Chr01	5373691	5202117		Nip./ZS97	GACATCCAGTCAAACGTCCGAT	TCATCACCCTCTTCCCCTCCTC	22	22	60.674	62.646	50	59.091	350
93	LInD1-358	Chr01	5431840		4849649	Nip./MH63	GCGAATGCACATTTGGCACATG	TACACACCATGGTCTTAGGCGG	22	22	62.111	62.055	50	54.545	313
94	LInD1-359	Chr01	5448755		4866523	Nip./MH63	GGCATGTAATGTCCTTTTCGGATGA	TCTTGGACTAATTCGCGAGACG	25	22	61.661	60.477	44	50	303
95	LInD1-360	Chr01	5694282		5119950	Nip./MH63	GTTTGGGGGAAAGCCTTTATGCA	TTGCCGGAGATCCACTGAATGT	23	22	61.888	62.007	47.826	50	344
96	LInD1-361	Chr01	5701860		5127774	Nip./MH63	TGGGAGAATTTAGAGGGGCACT	AGTGAGGTCCCATTGGCTTTGA	22	22	60.835	61.898	50	50	334
97	LInD1-362	Chr01	5764171	5573082		Nip./ZS97	CCTTAGACTGAGAATGTGCGGC	GCAAGCACAAAAACACGCTGAC	22	22	61.311	62.156	54.545	50	347
98	LInD1-363	Chr01	5787356		5221653	Nip./MH63	GGAGGAATAGAAACGCATGCACA	GCGTGCGTGCTATTAATCGGTA	23	22	61.482	61.421	47.826	50	349
99	LInD1-364	Chr01	5813175	5617445	5244521	both	TGTACGGGATGATTACAAACCCCT	GCTCCGGCTTTCTTACCTGTCT	24	22	61.614	62.309	45.833	54.545	305
100	LInD1-365	Chr01	5871643		5302500	Nip./MH63	CTTACTCCAAAGCTCGTGCACC	TCGTAGCTGATGTTTCGGAGGA	22	22	61.753	61.203	54.545	50	305
101	LInD1-366	Chr01	5893149	5718672		Nip./ZS97	GGGGCTTGTTCGAGGAGACATT	CTGCCAAATCTTGACACGAGCT	22	22	62.582	61.446	54.545	50	333
102	LInD1-367	Chr01	5911428		5353810	Nip./MH63	GATCTGACAAGTGGGCCTAGGG	GGAAGGGGTTGGGAATTCTTGC	22	22	62.131	61.736	59.091	54.545	346
103	LInD1-368	Chr01	5951431	5776965		Nip./ZS97	AGGGGCATTTAACAGTGTTACACA	GCTGCACGCAACATGAAATATACG	24	24	60.69	61.583	41.667	45.833	320
104	LInD1-369	Chr01	6125265	5971008		Nip./ZS97	CACCCAATCCTGCCCTTCACTA	ACGTACTCCTTTGCCTCCCAAT	22	22	62.018	61.687	54.545	50	341
105	LInD1-370	Chr01	6157025	6002806		Nip./ZS97	AGTCACTGAATTGTTTGCACCACT	AAGCTAGCTAGGACCGACATGC	24	22	61.409	62.17	41.667	54.545	327
106	LInD1-371	Chr01	6250751	6083206	5673978	both	GCAGCTAACACGTTCAAGCCAG	TGGACACTGTTTGATGGGGTCA	22	22	62.558	61.826	54.545	50	317
107	LInD1-372	Chr01	6274516			Nip./MH63	ATTACCGCCGCATCAGTTGTTG	GTTGCGTGTGAGTGTGTGACAT	22	22	62.076	61.877	50	50	339
108	LInD1-373	Chr01	6284831		5706754	Nip./MH63	TTGTTACAAACCCCACCTACTTTCT	TGTTGTTGGGGTAAAATCACGAGT	25	24	60.34	60.928	40	41.667	337
109	LInD1-374	Chr01	6324053		5747258	Nip./MH63	CCATGAGTCTATGGCTGCCTCA	CCGGAGATGCACGAGTCTACTT	22	22	61.872	61.836	54.545	54.545	304
110	LInD1-375	Chr01	6324720	6155823		Nip./ZS97	ACCCTTTGGATTGTTTGCTGAACA	TCTGGACCAATAAACTCGGCAC	24	22	61.662	60.614	41.667	50	343
111	LInD1-376	Chr01	6341699		5767930	Nip./MH63	CGGTGGTTAGGGGTGTGTGATT	TTAATTGTGCTGGGCGTGATGG	22	22	62.523	61.778	54.545	50	334
112	LInD1-377	Chr01	6360322	6204502		Nip./ZS97	GTGGCTGGCACATAAAAGGACA	AGAAAAATGCAAAGCCACGA	22	20	61.399	60.864	50	45.455	311
113	LInD1-378	Chr01	6403473	6257990	5833887	both	ATTTGCCGGTGGGGTACGAAAT	CCTCCAGGATGATCAGGAGCAG	22	22	62.86	61.933	50	59.091	307
114	LInD1-379	Chr01	6456038		5989661	Nip./MH63	CTGCAGGCCAGCAATGTCATAA	ACCCTAACAAACAGAGCTTATAGCA	22	25	61.526	60.046	50	40	346
115	LInD1-380	Chr01	6465585		5999154	Nip./MH63	CATGGCGCAACAGTAAATCC	TCGATCTGACTGTTGCGACACA	20	22	61.778	62.213	50	50	336
116	LInD1-381	Chr01	6466173	6325591	5999764	both	AAATGCAGGTAGGTCCGTTGGA	CTTTGGGATCAACAACCCCTGC	22	22	61.947	61.986	50	54.545	302
117	LInD1-382	Chr01	6476996		6010533	Nip./MH63	GCTATCAGCTGTTGGTCCCTGA	TCAGCAACATTTGTGTCCTGCG	22	22	62.064	62.205	54.545	50	317
118	LInD1-383	Chr01	6593328	6432960		Nip./ZS97	CATGCGATATCAGCGAGCGATC	GCATGTCCTCAAGGGCTTAGGA	22	22	61.906	62.075	54.545	54.545	347
119	LInD1-384	Chr01	6620361	6459774		Nip./ZS97	AGAAGTAGCACCAGCAGCTTGA	TTGTTCAAGTTCCCCTGAGCCA	22	22	61.935	62.092	50	50	342
120	LInD1-385	Chr01	6631804	6471275	6169717	both	TATGGGCACGCTGGATCAACTA	TCTTGAAGTGGGCATGACTCGT	22	22	61.544	61.931	50	50	349
121	LInD1-386	Chr01	6640681	6480249	6178663	both	TCAGTTCAGGTTTGCAGGTGGA	TGAAAGACTCCGTGGCACCAAT	22	22	62.081	62.461	50	50	318
122	LInD1-387	Chr01	6640842		6178795	Nip./MH63	TCAGTTCAGGTTTGCAGGTGGA	TGAAAGACTCCGTGGCACCAAT	22	22	62.081	62.461	50	50	319
123	LInD1-388	Chr01	6676206	6517153	6215569	both	ACAGATTTGTACGTGTTCTGTGACA	AGGGGACTGTTGATATCTTCCTGA	25	24	60.909	60.575	40	45.833	339
124	LInD1-389	Chr01	6714153	6558769	6257173	both	CCTGTTCCGAGGTCACTTCAGT	ATGTTGCAATGCCACAAGGGAC	22	22	61.921	62.245	54.545	50	341
125	LInD1-390	Chr01	6860969	6675775	6374170	both	TAGTTTTGGTCGCGCGTCTTTT	CGTCCAAACAGTTTCAGCTCCT	22	22	61.625	61.065	45.455	50	349
126	LInD1-391	Chr01	6917593	6742832	6441229	both	GTAGTGGCATCAACGACGCAAT	TCTCAGCTGGCGCTCCATTATT	22	22	61.813	62.13	50	50	323
127	LInD1-392	Chr01	6943542		6454172	Nip./MH63	TTCTTCGACGAGTTGAGACGGG	GACAGCGCTGCTCAAGGATGAC	22	22	62.263	64.018	54.545	59.091	310
128	LInD1-393	Chr01	6956524	6768722	6467118	both	CCGAGGCTGAGACCTGTTTAGA	CGCAGCTCGGACTTTAACTGTA	22	22	61.467	60.67	54.545	50	316
129	LInD1-394	Chr01	6979766	6792987	6491382	both	GTGCGTTTCGTTTCCTGGACTC	AGCTTCCCTCAAAATCCCCTCC	22	22	62.239	62.035	54.545	54.545	327
130	LInD1-395	Chr01	6998475	6820439	6518836	both	ACATGTCGTTTGTGCCAACCAT	AATAAGCTCACCCCGGCCTATC	22	22	61.594	61.942	45.455	54.545	307
131	LInD1-396	Chr01	7019048	6842409	6540807	both	AGCTCATGAAGACGATCGAGCC	GACGGTATGTCGAACAGGGCAA	22	22	62.467	62.858	54.545	54.545	300
132	LInD1-397	Chr01	7065468	6898770	6597209	both	TAAACCGTGTATGGGGTGCGTA	TCTTAACTTTGTGCGGCATGTGT	22	23	61.73	61.549	50	43.478	301
133	LInD1-398	Chr01	7080748	6936576	6635026	both	AGCCAAATCCCCCAATCCCTTA	CAGATTCGCCGCCTTCCCATA	22	21	61.455	62.576	50	57.143	323
134	LInD1-399	Chr01	7123499	6977818	6676265	both	GATGCCAAGAAGGAACCAGGGA	AGGACTCTACCCTCTGCCTGAA	22	22	62.283	61.978	54.545	54.545	304
135	LInD1-400	Chr01	7282777	7140457	6841524	both	GCAAGTTCAAGCATAGGAGTCTGT	ACGCAATTGGAGTTGGAGGGTA	24	22	61.1	61.947	45.833	50	338
136	LInD1-401	Chr01	7287101	7144728	6845795	both	GACCAGGCTGCGCACTCTAATA	AGGCCAAATTGTGCACATCTCG	22	22	62.422	62.03	54.545	50	347
137	LInD1-402	Chr01	7294417		6853140	Nip./MH63	TTGTTGGTCTCCTCTACTGGGC	TGGAAACGTTCTCGGAAGGTCA	22	22	61.679	61.857	54.545	50	327
138	LInD1-403	Chr01	7362620	7219933	6921021	both	TTTGAGCCCTCACTCTCTGTCC	CAAGCAAGCAAACTGAGCCAGA	22	22	61.673	61.903	54.545	50	300
139	LInD1-404	Chr01	7362967	7220230	6921316	both	CGCCGTGGCACTGATTGATATC	TGGACTTCAAAGCTACTGGACCT	22	23	61.995	61.268	54.545	47.826	312
140	LInD1-405	Chr01	7668482	7344323	7267617	both	TGTGCATCTCTCCTGTTTAGGGA	GCTAAGGGACGACAAGTGGACT	23	22	61.077	61.984	47.826	54.545	324
141	LInD1-406	Chr01	7689905	7365568	7288850	both	GGTAAAACATTTACGGCGTTTCAGC	AACAATTATGCGGCAGCTACCT	25	22	61.838	60.684	44	45.455	306
142	LInD1-407	Chr01	7729250	7404271	7327554	both	ACCAAACCGAGGTATCATCGCA	TGAGACAGCGAGAGACCGAAAG	22	22	62.055	62.017	50	54.545	301
143	LInD1-408	Chr01	7732231	7407202	7330485	both	TCTTTGGCCTCCGCATCAAGTA	TGTGAGGAGTTTGTGCGTGAGA	22	22	62.003	62.109	50	50	326
144	LInD1-409	Chr01	7865106	7525813	7449110	both	CCTGATTTCCTGGGGAGGGTTT	GTTGACCCAGCGAAAGGAACAG	22	22	61.977	61.952	54.545	54.545	306
145	LInD1-410	Chr01	8747090	8321532		Nip./ZS97	CGCAGCAATTGGGATCACATGA	ATTGGCCCCATAGTGCAGCTTA	22	22	61.837	62.097	50	50	330
146	LInD1-411	Chr01	8969557	8524889		Nip./ZS97	GCCACCCCACTCCCTTTTTAGA	CGAGGCCTCGCATTAGGTAGTA	22	22	62.224	61.391	54.545	54.545	350
147	LInD1-412	Chr01	9185084	8736030		Nip./ZS97	ACAACAAAGCGTACAGACACGT	TCAGGCAAGCTAGCTGAGGTTT	22	22	60.992	61.945	45.455	50	300
148	LInD1-413	Chr01	9241657	8785663		Nip./ZS97	TGATGAAATTGGGACGGAGAGAGT	CCAATTTGGTTATTATTCCGGGGTG	24	25	61.605	60.453	45.833	44	343
149	LInD1-414	Chr01	9255317	8799333		Nip./ZS97	ACTGATGGCCTTGCATGAAA	GCTCCTGTGGTGGGTTTGTT	20	20	62.03	62.421	50	54.545	350
150	LInD1-415	Chr01	9266939	8810967		Nip./ZS97	TTTCTATATGGCGGGCCTGGAG	TCAGTGCTCTCCCGGAAATGAA	22	22	61.941	61.678	54.545	50	321
151	LInD1-416	Chr01	9355037	8899088	8949740	both	CTTCCCCCTCTCTTTTCCTCCG	TCCACGATGAACCAGGTCCAC	22	21	62.065	62.048	59.091	57.143	336
152	LInD1-417	Chr01	9397046	8941639	8992304	both	ATTGGTCCGGAAACAATTCGGC	GTCACGGATGAACACCACGATG	22	22	62.033	61.804	50	54.545	345
153	LInD1-418	Chr01	9453343	9003373	9053981	both	CTCAGCCGACGTCATCAACATG	CATCTGTCTCTTCCACCTCCGG	22	22	61.861	62.108	54.545	59.091	350
154	LInD1-419	Chr01	9491561	9046101	9096728	both	ACGCAGGCATATCATAGTCCGT	TGCATGTATGTCATTAACTAGCCCA	22	25	61.661	60.397	50	40	348
155	LInD1-420	Chr01	9518230	9066739	9117358	both	TGGACCATATTCACTCAGCGGT	GCCCCACACGACACATGTTTTA	22	22	61.481	61.645	50	50	322
156	LInD1-421	Chr01	9548193	9109533		Nip./ZS97	AGTACATGGCGCCGTCACATTA	GAGGGCCTGTGTGCATAGGATA	22	22	62.363	61.615	50	54.545	303
157	LInD1-422	Chr01	9559094	9120410	9170984	both	TCACCTTGTTTTGAACACACCCT	CACACACACACTCCACACACAC	23	22	60.816	62.065	43.478	54.545	323
158	LInD1-423	Chr01	9572937	9134225	9184797	both	TCACATTGATCACATTGCCCCC	CGTTTAACGGCGGTGTATGAGA	22	22	61.213	60.986	50	50	343
159	LInD1-424	Chr01	9716239	9294159	9344750	both	GCATCATGCATCACTTAAACGACA	ATCTGCATGTCTAAGCTAGCGC	24	22	60.437	60.866	41.667	50	320
160	LInD1-425	Chr01	9733453	9311327	9361919	both	CCGGAGAGATTGTTGTCGGAGA	TTCCCGATCCATCCCCTTCTCT	22	22	61.78	62.391	54.545	54.545	334
161	LInD1-426	Chr01	9832397		9461577	Nip./MH63	CGTTCAGCGTAACCGAATTCCA	TGCGTACATTTATCTTGGAAGGTGC	22	25	61.492	61.878	50	44	335
162	LInD1-427	Chr01	9858629	9442546	9493162	both	AAATTTGAACCCTGCGAGCCAG	AGAGCAGTTTCAGCATCGAGGA	22	22	61.976	61.73	50	50	302
163	LInD1-428	Chr01	9886268	9474924	9525535	both	TGCATGACACTTGAGGTTTGGC	GCTAGGGGGTGACGTCATTTCT	22	22	61.909	62.06	50	54.545	304
164	LInD1-429	Chr01	9899620	9488010	9538621	both	TCATGCAAACTCCCTCCATCCC	TAAGCTTTCCCTACCGTGCGAA	22	22	62.35	61.985	54.545	50	332
165	LInD1-430	Chr01	9952213	9540067	9590692	both	TGAGTTTTGCCTGTGGAGTGGA	TATAGAGGAGAGGCTTCCCCCG	22	22	62.081	62.23	50	59.091	346
166	LInD1-431	Chr01	9975104	9565880	9616506	both	ATCCCCAACGAAGGATCTGTCG	TATATGCACTTTTCCGCGTGGC	22	22	62.115	61.883	54.545	50	307
167	LInD1-432	Chr01	10011543	9589299	9639924	both	AGAACGAATCCTCTTGCTGCCT	GCTTTCCAGCCACACGATTTCT	22	22	62.002	61.709	50	50	332
168	LInD1-433	Chr01	10098786	9664002	9714638	both	CCGGTGGGGGAGTAGTAGTACT	TACCGTGGCCCTATTTGGATCC	22	22	62.091	61.881	59.091	54.545	338
169	LInD1-434	Chr01	10106531	9671835	9722471	both	ATGGATGTTGGTATGCACTCACT	ACTCGAGACCCAAAACTCCTCG	23	22	60.054	61.973	43.478	54.545	311
170	LInD1-435	Chr01	10123759		9739668	Nip./MH63	TTGCTTCTCTCTGGTGCCTTTG	TTCACGCACACCAACAAATCCC	22	22	61.072	62.159	50	50	347
171	LInD1-436	Chr01	10124269		9740139	Nip./MH63	GGTGACATACTAGCATCGTGCC	ACATATGGCAGTCACGTGCAAC	22	22	61.118	61.761	54.545	50	302
172	LInD1-437	Chr01	10299121	9886803	9788251	both	TAATGATCTAGTTGCAGCGCGC	AGACAAGCGGCGCATTGTTTTA	22	22	61.679	61.957	50	45.455	333
173	LInD1-438	Chr01	10308964	9896599	9798050	both	GCTATGCCTCCGCCTCTATCTC	ACGGCCGATCGAATTATCCCAT	22	22	62.098	61.993	59.091	50	348
174	LInD1-439	Chr01	10312767	9905899	9807349	both	TCTTTCTTAGTTTCTTGCCGCGA	TGAGAAGCATGCACGATGGATT	23	22	60.801	60.682	43.478	45.455	319
175	LInD1-440	Chr01	10321720	9916191	9817649	both	ACGAAGTGGCATCCTACCTTCC	AAGGGGTCGACAACAGGATCTG	22	22	62.06	61.998	54.545	54.545	340
176	LInD1-441	Chr01	10331386	9937533	9838997	both	CACACTCCCCTTGCTCTCTCTC	GGAAGGTAGTATCGGCCGTGAG	22	22	62.047	62.215	59.091	59.091	315
177	LInD1-442	Chr01	10369617	9975890		Nip./ZS97	ACCTCAGATCTTGATGGCTCCC	GATCCAATCGTCATGTCGTCGC	22	22	61.555	61.972	54.545	54.545	337
178	LInD1-443	Chr01	10371150	9977373	9878851	both	ATCGGTGTGTGCTAGCTAGTGG	ACATCCTCACCTAAGCGCACAT	22	22	62.104	62.064	54.545	50	328
179	LInD1-444	Chr01	10663771		9916450	Nip./MH63	GCACTCACCCCTACGAAGGTAG	ACAGCGAATACACAAATCGGCG	22	22	62.1	62.115	59.091	50	306
180	LInD1-445	Chr01	10822933	10316054		Nip./ZS97	CCGAAGCGATCCGTTGGTATC	CGGCATTCCAATTCAAAGCAG	21	21	62.47	61.557	54.545	50	308
181	LInD1-446	Chr01	10828646	10321815	10084417	both	CAATCAAACTTTTGGCCAGCGC	GATTGGCCGATCGAGCAAGATG	22	22	61.994	61.999	50	54.545	316
182	LInD1-447	Chr01	10833140	10326348		Nip./ZS97	TAGCCAGTAACAGTTGGGCAGG	TAGCGGTTTTCAGGCGAGCTAT	22	22	62.266	62.111	54.545	50	322
183	LInD1-448	Chr01	10890330	10381477	10131068	both	TGAAGAGAAGACTTGTCCGCGT	GTGACAGGGAGAGCTACACCTC	22	22	61.907	61.785	50	59.091	310
184	LInD1-449	Chr01	10903334	10393657	10143251	both	ACTCCTGTCATCTGATTGCCCA	ATCGACCAGAGAAGCGTCATGG	22	22	61.427	62.414	50	54.545	350
185	LInD1-450	Chr01	10970989	10474476		Nip./ZS97	ACTCCTTGTGTGTTTTTGCCCT	TGCATCAGCCGCCATATAGGAA	22	22	60.888	61.94	45.455	50	300
186	LInD1-451	Chr01	10982745		10234750	Nip./MH63	TGGAGTTTTCGCCTGGCTAGAT	TTCAACTGACCCCTTGCCTGAA	22	22	61.745	62.092	50	50	332
187	LInD1-452	Chr01	11007253	10531311	10281138	both	ACTTTGGGCATGTTCGGTAGTT	ACGCACCGTACATTTAAAACCAGA	22	24	60.488	61.275	45.455	41.667	302
188	LInD1-453	Chr01	11099424		10378025	Nip./MH63	CCCTGTTTGCTGCATGGTTCAT	AACGTCGGTCCTTCCTCTTCTG	22	22	61.989	61.973	50	54.545	346
189	LInD1-454	Chr01	11111221	10643001	10392823	both	GGAGTTGCCCAGGAATCCGTTT	TGGGCTCAAAGTTTGCACCAAA	22	22	63.112	61.739	54.545	45.455	327
190	LInD1-455	Chr01	11237815	10772631	10522526	both	CCGACGACCAAAGGCTAGAGTT	TGGGCTTGTTTGATTTGGAGCC	22	22	62.292	61.93	54.545	50	311
191	LInD1-456	Chr01	11240304		10525027	Nip./MH63	CCACTACACCCGGGAAAAAGGA	ACCATCGATCTATCCCAGTCGC	22	22	62.207	61.718	54.545	54.545	314
192	LInD1-457	Chr01	11374118	10895602	10645475	both	TGGTAAGCTCTCTCGAAGTGCC	AGTTGTTGGGCCAAGCATGAAG	22	22	62.039	61.924	54.545	50	315
193	LInD1-458	Chr01	11377670	10899163	10649036	both	CAACCCAATGACGTGTGTGACC	CGGTAAAATATGAGCATGCAATGGA	22	25	62.201	60.278	54.545	40	329
194	LInD1-459	Chr01	11731002		10741987	Nip./MH63	CTAGCCGTGACCAAGCGTTTAC	TTCACGTGCAATGAATGGGCAA	22	22	61.801	61.914	54.545	45.455	343
195	LInD1-460	Chr01	11760400	10982862	10771342	both	TACGTCTTGCAGTTCGTGTTGC	CGGTGACAGGGAATCGAAGCTA	22	22	61.924	62.099	50	54.545	314
196	LInD1-461	Chr01	11774800	10993248	10781718	both	TCTCTCGGGCAGTTAGGAATGC	TGAACAATGGAGGAAGAGCCGC	22	22	62.115	63.143	54.545	54.545	334
197	LInD1-462	Chr01	11809246	11033490	10821971	both	TCACCGTACTCCGTACTCTTTGT	TGGGACGAAGGGAGTATAAGGC	23	22	61.057	61.282	47.826	54.545	328
198	LInD1-463	Chr01	11850747	11077494	10865973	both	CAGGGGGATTCAGGGGTGAAAA	TAGGCCGTGTTTAGTTCCCACA	22	22	62.24	61.613	54.545	50	342
199	LInD1-464	Chr01	11955528	11171453	10959911	both	CTTCTTGTGGAAGGGGTGCCAG	AGCAAAGGAGTCACGACGAATT	22	22	63.36	60.548	59.091	45.455	325
200	LInD1-465	Chr01	11963102	11179087	10967545	both	TCAGAAATGCATTTTCACGGGCA	TGACCGAGAAACAGATCTGTGGA	23	23	61.868	61.317	43.478	47.826	332
201	LInD1-466	Chr01	12124365	11313327	11101654	both	TTTTGAACTTGAACCCACGGCA	TTTGCACCCGATTGTCAAAGCC	22	22	61.467	62.481	45.455	50	349
202	LInD1-467	Chr01	12320189	11604820	11393198	both	GTGCCTCTTGGTTCTTCTTTCTGT	TGCTCTCTTTTCATCCCTGCAC	24	22	61.224	60.877	45.833	50	334
203	LInD1-468	Chr01	12351529	11635506	11423886	both	AGCATCCTGATTCCCTGCAAGA	GTGGGTGGTGTACAGCTAGAGG	22	22	61.761	62.049	50	59.091	348
204	LInD1-469	Chr01	12397582	11686851	11475217	both	ACAACGTATTATGGCTACATGCTGC	TGCCTACAGCTTTGTGAGACCA	25	22	61.985	61.874	44	50	348
205	LInD1-470	Chr01	12584821	11856463	11637970	both	GCCAAATCCAACAAGGGATGCT	TGCCTTGCTCATATACCCCACC	22	22	61.738	62.148	50	54.545	343
206	LInD1-471	Chr01	12612340	11874815	11652831	both	CTTGCTAATTTTGGGCCTCCGG	ATAGGTTCACCACTCGTTGCCT	22	22	62.103	61.679	54.545	50	340
207	LInD1-472	Chr01	12689754	11927319		Nip./ZS97	AGATCAACGATGAGGGACACCG	AATCCATGGGCCCCACATGTTA	22	22	62.104	62.051	54.545	50	344
208	LInD1-473	Chr01	12696381	11934097		Nip./ZS97	TGGATTCCCACCCGCTCTTAAT	CACCCCAACCAAATCGAACACA	22	22	61.497	61.59	50	50	350
209	LInD1-474	Chr01	12936615	12172254		Nip./ZS97	GGCACCATGGAGCATCAAACAA	TGGAAATGTGCTCAACTGACGA	22	22	61.985	60.485	50	45.455	308
210	LInD1-475	Chr01	13277372		12154692	Nip./MH63	AGGTTTTCTCCCATCCTTAGGCA	CCATGAAGGGAGGTACCGAAACT	23	23	61.346	61.953	47.826	52.174	335
211	LInD1-476	Chr01	13363397	12469995		Nip./ZS97	GCCCGCATGTCAGCAAGAAAT	AAATGATGGTGCAGCTGAGT	21	20	61.835	62.034	50	50	324
212	LInD1-477	Chr01	13532882		12428643	Nip./MH63	ATTTAGGGCCCGTTCTTCTGGT	TGAGCCTGTCGCCTAAGTTCTT	22	22	61.697	61.67	50	50	339
213	LInD1-478	Chr01	13778622	13153338	12998492	both	TCAGACTGGTATGGCAGTACCTG	GCTCTCCCGCCTGTGATTCTAT	23	22	61.444	61.926	52.174	54.545	344
214	LInD1-479	Chr01	13889359		13142836	Nip./MH63	CATGCCATGCACGCATTTCAAC	AGCAGCATGTGTATTCATCCCCT	22	23	62.111	62.035	50	47.826	335
215	LInD1-480	Chr01	13933850	13314415	13187231	both	CGAACGGCAAGGAGTACGAGAT	AGTCTTGACACAGGAAGGCAGG	22	22	62.393	62.197	54.545	54.545	334
216	LInD1-481	Chr01	13942096		13197296	Nip./MH63	CGTTCAACCACGACAAGCTCAA	ACACGCAGTTGATCGAGCTAGA	22	22	61.873	61.771	50	50	333
217	LInD1-482	Chr01	13947680		13204189	Nip./MH63	TGCTACACCCCAAAAGCTAGCT	GGCCAATGTCTCCCGATTTTGG	22	22	61.952	62.103	50	54.545	349
218	LInD1-483	Chr01	13961529		13215848	Nip./MH63	GGGCCCACCTGTCATCTAACTC	CCTTGCATCCTTCTCCTCAGGT	22	22	62.388	61.752	59.091	54.545	315
219	LInD1-484	Chr01	14040089	13421456	13352029	both	ATTTTGGTGCCGATAACCTGCC	TGTCCAGCATGAAGAATTGCAGG	22	23	61.788	61.68	50	47.826	331
220	LInD1-485	Chr01	14081853		13407944	Nip./MH63	GGTTCATCCAAAACCGGCACAT	GGAAGGGACTGAGTGTTCGACA	22	22	61.982	61.917	50	54.545	300
221	LInD1-486	Chr01	14102426		13429665	Nip./MH63	CACCTCTCTCGGTTTTTACGCG	CAGACACAACGAACAGCTGACC	22	22	61.792	61.932	54.545	54.545	313
222	LInD1-487	Chr01	14299655		13602995	Nip./MH63	CTTCTTCGTGCTTCTGCTGCAA	GAGAGGGAGGCTCGTCAAAGAG	22	22	61.945	62.098	50	59.091	335
223	LInD1-488	Chr01	14326139	13663560		Nip./ZS97	AAGAGCTGTATAAAACGGATGGAGT	CGTCATCATGATTGCTGCCTCC	25	22	60.105	61.949	40	54.545	305
224	LInD1-489	Chr01	14379839	13708663	13688736	both	GAAGCTGCACCTTCATCGCATT	ACTTAAGGTTGATCCGGCCTCA	22	22	62.085	61.422	50	50	350
225	LInD1-490	Chr01	14391732	13724251	13700573	both	CTCCATGCATCGCAACACACAT	TCATTGAAACCAGGAAGCAAGGT	22	23	62.084	60.691	50	43.478	338
226	LInD1-491	Chr01	14401085	13733632		Nip./ZS97	CGTATCGATCGGAGTCGTTTGC	ACGCATTAAATCACACCCACCT	22	22	61.711	60.554	54.545	45.455	350
227	LInD1-492	Chr01	14606096	13935661	13908246	both	TTTCATGGGCCCACAGAGTCAT	CCTCTGTAAGCTGGCTTCCTCT	22	22	61.965	61.48	50	54.545	350
228	LInD1-493	Chr01	14639814	13975159	13942538	both	GGCCACTCCTTGTCAGCAATTG	AGGACTCGTGGGTTGATCCATG	22	22	62.287	62.064	54.545	54.545	343
229	LInD1-494	Chr01	14673872	14000473	13967854	both	ATGCTTCAAGTTGGGAGTGCAC	TAAATTCGCAGACGTGTTGGGC	22	22	61.655	62.008	50	50	327
230	LInD1-495	Chr01	14757026	14267021		Nip./ZS97	CTGTCACAGGATCCCGTTGTCT	CGGTACTTCAAAGACAATGGCCA	22	23	61.987	61.364	54.545	47.826	335
231	LInD1-496	Chr01	14811374		14144977	Nip./MH63	TGACTAGGACATCCTTCCAGGC	TGCTGAGGCAATGACTGTGAGA	22	22	61.22	61.934	54.545	50	312
232	LInD1-497	Chr01	15283238	14708788		Nip./ZS97	TGGAGCTTAGCTGGTGTGTGTT	TCTCCAGCTCTTCTCTGTGCAC	22	22	62.137	61.981	50	54.545	312
233	LInD1-498	Chr01	15346312	14748121		Nip./ZS97	CGTGCAAATTTAGCCGAGACACA	ACACCGAGTCTTTCCATCCCTA	23	22	62.191	60.559	47.826	50	350
234	LInD1-499	Chr01	15450640	14830106		Nip./ZS97	ATGTACATGCTGTCCGGATGCT	TCTTCTCCGGTGCTTGATTCGT	22	22	62.13	61.983	50	50	307
235	LInD1-500	Chr01	15646865	14990743	14943803	both	GCCAAAATGTTGTAGCTGTTGCA	CCTCAGCAACCCTGTTGTTGTT	23	22	61.045	61.531	43.478	50	339
236	LInD1-501	Chr01	15981249	15356517	15284867	both	TCAAACAAGGTGTTGACGCGAA	CACAGAAAACGGAGCAGCGATT	22	22	61.506	62.006	45.455	50	350
237	LInD1-502	Chr01	16119422	15471335		Nip./ZS97	AGGGCAACTAAGGGCTTGTTCA	TTGGAGTGATTTGCGGAAACCA	22	22	62.16	61.012	50	45.455	348
238	LInD1-503	Chr01	16133358	15485300	15413557	both	GGCTCTTAAGTGATCCGCATGC	CGAATGGAGGGATGGAACCTGT	22	22	61.946	62.075	54.545	54.545	301
239	LInD1-504	Chr01	16155509	15528593		Nip./ZS97	CTGCCCGTATTTACACTGCAGC	ATGATTTCAGCATGTGCAGGGG	22	22	62.13	61.537	54.545	50	313
240	LInD1-505	Chr01	16158284	15531315	15459630	both	GGGATCAACATGTGTGAGCTGG	GCGACCGCCCAAGAAACAATTA	22	22	61.519	62.018	54.545	50	324
241	LInD1-506	Chr01	16387413	15765925	15705229	both	GCTGTTGCAACTTCCCTGCTAA	GAGGCCGGAAGTGTTCTCAAGA	22	22	61.651	62.243	50	54.545	332
242	LInD1-507	Chr01	16588197		16013555	Nip./MH63	AGGACCGATCATTCGCTCACAA	TCGACTCTACAGGATTCGGGGA	22	22	62.048	62.078	50	54.545	314
243	LInD1-508	Chr01	17159550		16597888	Nip./MH63	GACCCTAATTCGTTGGCCCTCT	AGGAGCAAAAACAAACGCAGGT	22	22	62.072	61.788	54.545	45.455	348
244	LInD1-509	Chr01	17162560		16600498	Nip./MH63	GTAGCTGTTTTGTGCGTCTGGG	GTTCCCTTGCTCCATCACCTCA	22	22	62.255	62.271	54.545	54.545	300
245	LInD1-510	Chr01	17308487	16617329		Nip./ZS97	TAGATGTGCTGAGGCTATCC	TGGGTTTGATAATGCGTCACC	20	21	61.977	60.553	54.545	45.455	318
246	LInD1-511	Chr01	17325794	16634511	16776942	both	ATCCCACCCCAAAATTTTCGCC	GCCCGGTATTTAGATCCAGGGG	22	22	62.003	62.267	50	59.091	320
247	LInD1-512	Chr01	17348420	16650658	16793094	both	TGGCTGTTATGTGTGCACCAAC	AGGGATACAAAGTACGGGCAGG	22	22	61.905	61.808	50	54.545	345
248	LInD1-513	Chr01	17405251	16709836	16845787	both	TCACGTGGGCCTCACTACTTTT	AGAGCAAGCTAGAGTTGTGCCA	22	22	61.871	61.935	50	50	306
249	LInD1-514	Chr01	17804310	17023616	17318611	both	AGACCGCCTGCAACTACATCTC	ACAAGACGAGACTGTGAGGACG	22	22	62.362	61.953	54.545	54.545	313
250	LInD1-515	Chr01	17810649	17032890	17327881	both	CTTCCGAAGACTCCGAGGACTC	AAAAACCGACCTTAGCTGCCAC	22	22	61.828	61.649	59.091	50	348
251	LInD1-516	Chr01	17812919	17035142	17330133	both	AACCCCTGCTTAGACTTTGGTTT	CTCTCTCTCTCAGGCGTCGTTG	23	22	60.374	62.378	43.478	59.091	341
252	LInD1-517	Chr01	17854747	17118699	17425696	both	GAAGTACCTCACGAGTTTGCCG	TGACCGTTTGATTAGACCGCAG	22	22	61.488	60.929	54.545	50	349
253	LInD1-518	Chr01	17953533	17239462	17546492	both	AGAGCCCGGTCAAGGAAATTGA	GGAAAAAGTCCTTTCCCCCAGC	22	22	61.952	61.67	50	54.545	300
254	LInD1-519	Chr01	17980037	17279892	17586900	both	CCCACCAACCAAACACACCCTA	CCAAATATGCATGCCCGTGGTT	22	22	62.679	62.113	54.545	50	342
255	LInD1-520	Chr01	18012797		17620020	Nip./MH63	AGTAGGGGCAAGTAGCTGCTTC	GCAGATTGCGTGATTAGCATCAT	22	23	62.065	60.058	54.545	43.478	349
256	LInD1-521	Chr01	18067398	17366998		Nip./ZS97	TAGCTAGTTCAAACTTGGCGCG	CCAGAATCAGATCTCCACCGGT	22	22	61.495	61.543	50	54.545	301
257	LInD1-522	Chr01	18383872		18007526	Nip./MH63	AGCAGGAGTAGTACTAAGCTTCTCA	TTTTGTTGTCCCAGCTGATCGC	25	22	60.574	61.961	44	50	332
258	LInD1-523	Chr01	18439800	17766514		Nip./ZS97	GGAAGATTTGTGTTCCTGCCGG	GCCGGATGACTGGATGAGCTAT	22	22	62.027	61.991	54.545	54.545	320
259	LInD1-524	Chr01	18477922	17804731	18101255	both	TAGAGGCCTGGACACCATGATG	ACGCATGCTTCATTTGTTTGCT	22	22	61.551	60.546	54.545	40.909	347
260	LInD1-525	Chr01	18479300	17806170		Nip./ZS97	ATCCCCTCTCTTTAGTCCCGGT	AAGAGGATCAGCCCAGCATCAG	22	22	62.054	62.139	54.545	54.545	305
261	LInD1-526	Chr01	18612183	17934443	18223202	both	CCGTGGCCTTCTTTTGTATTCCG	ACAGATGTGTCCACTGGCCATT	23	22	62.264	62.22	52.174	50	346
262	LInD1-527	Chr01	18707901		18305191	Nip./MH63	TCTGAATCATGTCCTCCGGGTG	ATCTCGTCCCACGGTTGTCATT	22	22	61.802	61.993	54.545	50	334
263	LInD1-528	Chr01	18748508		18348855	Nip./MH63	ATCATGCGAAGTGAGCGTAGGT	GTTATAGCGACAGGGCTCGACT	22	22	62.104	61.898	50	54.545	310
264	LInD1-529	Chr01	18756825		18357115	Nip./MH63	GTGGATGTAATTAGCAGCGGCC	TTAGATTGAACCCACGTCGCCT	22	22	61.952	61.989	54.545	50	340
265	LInD1-530	Chr01	18762546		18362895	Nip./MH63	GGAAGTGCTTGTGGTCGGAAAG	GTGGACACTGCGCCGATTAAAA	22	22	61.952	62.008	54.545	50	310
266	LInD1-531	Chr01	18779628	18089620		Nip./ZS97	CGGCTACCAGGGAACGTAGAAA	TGGGACGAAGGGAGTAGCAATT	22	22	62.041	61.422	54.545	50	346
267	LInD1-532	Chr01	18787727	18113191		Nip./ZS97	TGTCTGAGTGGCATGCTACCAT	TTGACAGGCAGCTTGTTTTGCA	22	22	61.748	62.046	50	45.455	343
268	LInD1-533	Chr01	18815482		18419301	Nip./MH63	ATCGGGAGAGGAGAGGAATCGT	TGATCGAGTAGCAGTCTTGGCC	22	22	62.156	62.104	54.545	54.545	304
269	LInD1-534	Chr01	18817894	18142489		Nip./ZS97	ATGCATCGTACTCTCTCCGTCC	TAGCTTCAGTCGGTACTCGGAC	22	22	61.645	61.255	54.545	54.545	349
270	LInD1-535	Chr01	18864133	18188999		Nip./ZS97	TCCAGTTGCGACCTTATTCCCA	TCCGCTGCTGTTGCTTTCTTTT	22	22	61.683	61.844	50	45.455	337
271	LInD1-536	Chr01	18889256	18204342		Nip./ZS97	TTGGTCACCTCCTGTGCTCTTT	GCCAAAGACATAGAATGCCGCT	22	22	61.821	61.581	50	50	337
272	LInD1-537	Chr01	18935547		18547147	Nip./MH63	GGCTTCTTACCGTGCTTTGCTT	GCGCGTTGCTCTTGTACACTAG	22	22	61.962	62.094	50	54.545	323
273	LInD1-538	Chr01	19054630	18433812	18705585	both	GAAACCGACGCCAAATGTCCTT	CGGCCTATACTTACGTGGTGCT	22	22	61.958	62.161	50	54.545	337
274	LInD1-539	Chr01	19191112		18886963	Nip./MH63	TCGGAGGTCCCAGATTTTGTGG	TGTCACTTGGCAGCCACTGTAT	22	22	62.266	62.203	54.545	50	339
275	LInD1-540	Chr01	19235217	18630549	18916698	both	TCTTCCTCCACCATCGCCTCTC	AGAGAAGAGGGGAAACACACGC	22	22	63.508	62.502	59.091	54.545	350
276	LInD1-541	Chr01	19305467	18722705		Nip./ZS97	GCCACCTGAAAGTAATCAAAGCCA	TGCCACTAAAACCAATAACCAACCA	24	25	61.826	61.395	45.833	40	325
277	LInD1-542	Chr01	19360172	18776236		Nip./ZS97	ATCTGGCTGCTCCTCATCCATG	CCGTCTCACTCTCATCGTCGAT	22	22	62.206	61.628	54.545	54.545	343
278	LInD1-543	Chr01	19388424	18806729	19086738	both	TCTCTCCACTCTATCCCCGCAT	TCCCTTCACATGAACTTCTCGAGT	22	24	62.166	61.536	54.545	45.833	306
279	LInD1-544	Chr01	19395328	18826566		Nip./ZS97	CCAAGTTATGGCTCCCATCGGA	ACTGCTGTTGAATGGTTCTGCT	22	22	62.137	60.751	54.545	45.455	331
280	LInD1-545	Chr01	19457652	18868546		Nip./ZS97	CCCCCAAACAGTCCAGCTTTTG	CTGGTCTGCTACATGCCTGCTA	22	22	62.179	62.118	54.545	54.545	347
281	LInD1-546	Chr01	19512704	18906824		Nip./ZS97	TCATATTCAAGGTAGCCCGCGC	CGTGCGGTTTCATGAGACGATT	22	22	63.054	61.804	54.545	50	342
282	LInD1-547	Chr01	19534620	18939291		Nip./ZS97	ACAGCATTCGAACCGGGACTAA	GCTGCTACTGCCCTAATTACGC	22	22	61.989	61.689	50	54.545	328
283	LInD1-548	Chr01	19545426	18950066		Nip./ZS97	TCAGCGATGACTGAACGGAAGT	CATGGCATTCCGGTGTCGATTG	22	22	61.972	62.446	50	54.545	302
284	LInD1-549	Chr01	20232176	19298587		Nip./ZS97	TCGATCGACAGCAACAGTACGT	TATGCCACACACTTCAGCCGTA	22	22	62.009	61.988	50	50	339
285	LInD1-550	Chr01	20256036	19491445		Nip./ZS97	AGCACAACAATCAACCCAAGCC	CTATGGGGGATGCCAGTCAGAC	22	22	62.179	62.197	50	59.091	325
286	LInD1-551	Chr01	20262265	19497220		Nip./ZS97	CCTTTGCAGAGGTGGTAGGTGA	TCACCTCGTGGATCATTCACCC	22	22	61.941	62.059	54.545	54.545	310
287	LInD1-552	Chr01	20280693	19515136		Nip./ZS97	GGGGAGGAAGAGGGGAAAGAGA	GAGATTCCCGCGCATACCATG	22	21	62.592	61.533	59.091	57.143	300
288	LInD1-553	Chr01	20316612	19551011		Nip./ZS97	TCCATGTTGTCTTTGTTGCGCA	ATCCAAATCCCCTTCAGCACCT	22	22	61.839	61.712	45.455	50	347
289	LInD1-554	Chr01	20327808	19562160		Nip./ZS97	CAGTCCGACTGTAAATCGCAAGAC	GGGAGAGAGAAGGAGAACAGGC	24	22	61.945	61.798	50	59.091	301
290	LInD1-555	Chr01	20385409	19607779		Nip./ZS97	TGCGAGACGAATCTTTTGAGCC	CGGAGGAGCAAAGGTTAATGGC	22	22	61.498	61.835	50	54.545	345
291	LInD1-556	Chr01	20606038	19734612		Nip./ZS97	CGCTTTGACTTTCTCTTTCGAACG	CAAGGGCTGCAACAGGTCTCTA	24	22	61.119	62.258	45.833	54.545	324
292	LInD1-557	Chr01	20654444	19779645		Nip./ZS97	TCTTGGACATGATTCGGCAGGT	GCCCACATATTTGCCTTGCACT	22	22	62.007	62.052	50	50	319
293	LInD1-558	Chr01	20905058	19883206		Nip./ZS97	GACAAACGTGGCAGATCGATCC	AGTCGAGCTCTTGAGCCTAACC	22	22	61.868	61.785	54.545	54.545	349
294	LInD1-559	Chr01	20907180	19885283		Nip./ZS97	GGACGGAGGGAGTACTTCCTTG	GCCAAGTGTTTGTTGGTAACCG	22	22	61.79	60.797	59.091	50	321
295	LInD1-560	Chr01	21033484	19986278		Nip./ZS97	TTACCCTTGCCTTTCCTTCCACT	AGAAATGCACTATGGTTGGGCG	23	22	61.792	61.524	47.826	50	300
296	LInD1-561	Chr01	21192760	20146999	20877206	both	TCCTTCTCCTTTCAAGGCCAGG	TTCCGAACGGTCTGGTGGAAAT	22	22	61.956	62.195	54.545	50	339
297	LInD1-562	Chr01	21359033	20240475	20970762	both	GAAATGTCAGGGCAGGCATTCC	TAAAAATGCGCAACCCCCTGTG	22	22	62.107	62.235	54.545	50	337
298	LInD1-563	Chr01	21361927	20242742	20973029	both	CGAAAGTGAGTTTGGGCAGTGT	TACGCAGACCTACTTCACCGTG	22	22	61.578	62.019	50	54.545	327
299	LInD1-564	Chr01	22561980		21592153	Nip./MH63	TGTCTTGGAGTCCGTGCTACAG	GGGAGAGATTGATTAGCGGGAGG	22	23	61.972	62.188	54.545	56.522	333
300	LInD1-565	Chr01	22648020	20719296		Nip./ZS97	ACAGTACTCCCTCCGTTTCACA	CCTAAAACCAACAGAGCCAGCG	22	22	61.018	62.016	50	54.545	333
301	LInD1-566	Chr01	22815172	20880839	21853773	both	TTATGGCGGCGGATAAGAGTCC	TGAAGAGTGTCAAGCTGAGCCA	22	22	62.238	61.868	54.545	50	315
302	LInD1-567	Chr01	22853875	20913921		Nip./ZS97	GCATGGTGGTGCAAGAAAGAAA	TCGTCAAGTTTCAGGTGCACTT	22	22	60.224	60.68	45.455	45.455	300
303	LInD1-568	Chr01	22897241		21926912	Nip./MH63	TTGCTGTTTGATCGGAATCGGG	GTGTCGCACGGGATCTTACTCT	22	22	61.513	62.089	50	54.545	315
304	LInD1-569	Chr01	22916368	20979481		Nip./ZS97	AGCATCGGGTGTGAACTCTGAA	GATGCAGAGACCTCCGAATCGA	22	22	61.931	61.901	50	54.545	336
305	LInD1-570	Chr01	22939550		21969064	Nip./MH63	TAACAAGCGAGCCCGAATCTGA	ACTTCAATGTGTGGGTAAGCAAAGT	22	25	62.044	61.388	50	40	328
306	LInD1-571	Chr01	22958783	21027165	21988274	both	GGAGGGAGGGAGAAAGGACAAT	ATCTCTCTCCTCCAATCGCTGC	22	22	61.168	61.919	54.545	54.545	350
307	LInD1-572	Chr01	22997884		22039180	Nip./MH63	AATCTCTCCCACCACCATCGTC	AACTCCCTCTCCCAGCTCTA	22	20	61.803	61.978	54.545	54.545	350
308	LInD1-573	Chr01	23030772	21090969	22069629	both	CTACTCCTCGCACCACACTGAC	TTCTGGCTCCCTACGAAACTCC	22	22	62.587	61.733	59.091	54.545	302
309	LInD1-574	Chr01	23075371	21122593		Nip./ZS97	GGCCTGTTCACTTTGATGCCAA	GCCATGACCAACTGACCATGTG	22	22	61.919	62.03	50	54.545	328
310	LInD1-575	Chr01	23103061	21149762		Nip./ZS97	TATGGCTCTGGTTCGTCTGCAA	ACGCTTGCACGATAGCTACCA	22	21	61.992	62.157	50	52.381	300
311	LInD1-576	Chr01	23114376		22166648	Nip./MH63	AGCTCTCGACAATTCCGTACCA	TCCATGCTCGATGTTAAGCCGT	22	22	61.464	62.369	50	50	303
312	LInD1-577	Chr01	23124392		22176720	Nip./MH63	ACTTGAGAATTGCGGACGAA	GAACTGGGGAGGCTCAGAGAAG	20	22	61.753	62.058	50	59.091	321
313	LInD1-578	Chr01	23150777	21202578		Nip./ZS97	GTAATATCAGAGCGGCAGAGCC	GGCATTGGTTGTCAACGAAGGT	22	22	60.929	61.906	54.545	50	327
314	LInD1-579	Chr01	23156229	21208037	22235378	both	GGAGACAGTGATCGAAAAGGCG	TCCCTTCCCCTTGCATTCTCAC	22	22	61.555	62.283	54.545	54.545	307
315	LInD1-580	Chr01	23172474		22250413	Nip./MH63	GTCAATATCACCACGTAGGCGC	ACGTCAGTGCCACATCACCTAA	22	22	61.677	61.927	54.545	50	346
316	LInD1-581	Chr01	23326104	21393742	22427611	both	TCTAGGAGAGAGGTGGCGAAGA	GTCGTCCTCCCTCTCCCTATCT	22	22	61.755	61.891	54.545	59.091	311
317	LInD1-582	Chr01	23390907	21466972	22490308	both	AGGGGTGAGGAAGTCAAGGAGA	TAGAGCAGGTTCAAGCTAGGCC	22	22	62.19	61.803	54.545	54.545	303
318	LInD1-583	Chr01	23401005	21483828	22502407	both	TGGACCTAGATCCATGATGGCTG	TCTGGCAAGAGAGAGAGAGAGAGA	23	24	61.582	61.612	52.174	50	300
319	LInD1-584	Chr01	23414770	21499189		Nip./ZS97	AGCAAACCGTATCATGAGGAGTT	TGTCCTCCATGCCACATGTTTT	23	22	60.055	60.756	43.478	45.455	301
320	LInD1-585	Chr01	23464372	21558086	22569335	both	AAGAAGCTGCCGATCCACTGG	AAGTTCATGCCGGAGAGGTCG	21	21	62.721	62.432	57.143	57.143	350
321	LInD1-586	Chr01	23589578	21663760	22675395	both	TGCTCGCCACAGTACACATACA	GGAGCAGAGGTCTAGTGCGATC	22	22	61.978	62.213	50	59.091	337
322	LInD1-587	Chr01	23699946	21814316	22808510	both	ACGTCCGATCTGTAGCTGTAGC	TGAGAGTGGAGAGGGAGAGCTC	22	22	61.888	62.345	54.545	59.091	324
323	LInD1-588	Chr01	23734081	21850716	22844914	both	TGGAGTGCATAATTGAGGGCCA	GTGCCGTCTTTTATGTGCCACT	22	22	62.028	61.705	50	50	308
324	LInD1-589	Chr01	23764659	21885148	22879336	both	GGGCTCGGGTGGATTCTATTCT	ATAGATCAGCGGTGGTCCACAG	22	22	61.616	61.859	54.545	54.545	316
325	LInD1-590	Chr01	23827756	21957327		Nip./ZS97	AATTCCTGCGAGACGAGGACAA	ATTGGGATTTTGGGAGAGGGGG	22	22	61.983	62.056	50	54.545	324
326	LInD1-591	Chr01	23868482		23028293	Nip./MH63	GGCCTGGACCCATATGTCAATG	ACTTAAGCCCCATCGTTTGCTC	22	22	61.077	61.199	54.545	50	341
327	LInD1-592	Chr01	23901992	22031003		Nip./ZS97	TGGAAACGATACTCGACCAGCC	CCGTGAGAGAGGGGGAAGATTG	22	22	62.352	62.12	54.545	59.091	340
328	LInD1-593	Chr01	23942392		23101001	Nip./MH63	GGTTTTGCGGAACCACCATTCT	TGCCGACAGAGTCACCATATCC	22	22	61.916	61.855	50	54.545	333
329	LInD1-594	Chr01	23960277		23118881	Nip./MH63	GCCTAGGAAGGTTGGACTTGGT	GCAGAGCATCAAAAACAACAGCA	22	23	61.953	61.042	54.545	43.478	344
330	LInD1-595	Chr01	23986619		23145190	Nip./MH63	CCTCACGCATCCTCTTTATTGTCG	GTTAGGATTTTCGTGCAGCGGA	24	22	61.783	61.503	50	50	348
331	LInD1-596	Chr01	24037402		23191469	Nip./MH63	CTTGCGCACAAACAAGGAGGAT	CGAGGCACAGTCGTTAAAACCG	22	22	61.965	62.286	50	54.545	349
332	LInD1-597	Chr01	24072258		23238654	Nip./MH63	TGTATGCAGCTGTCCTCTGTGG	TGGCAAACCAGTCCATATTCCCA	22	23	62.312	62.173	54.545	47.826	340
333	LInD1-598	Chr01	24116168	22246509		Nip./ZS97	ATAGGGCATGCAGGTGTGAGTT	CCAAACATCCACATGGCCACTC	22	22	62.023	62.041	50	54.545	300
334	LInD1-599	Chr01	24144735		23308996	Nip./MH63	AGGAGATGCCCTGCTTTCCTTT	ATCTAATTGCCACGTATGCGCC	22	22	61.971	61.696	50	50	329
335	LInD1-600	Chr01	24163592	22294934	23328101	both	TAGATTGCTGCAACCGCACAAG	AACAAACCTCTTGATGCGTGCC	22	22	62.015	62.218	50	50	329
336	LInD1-601	Chr01	24238575	22380998	23414113	both	TCACTTGATTTTCTCGGCAAGGA	GAGGTACACGCGGTCCTCAAAG	23	22	60.496	63.146	43.478	59.091	324
337	LInD1-602	Chr01	24270735	22420223	23453336	both	TTCCGTTGTTTTGGTTGGCTCT	TGCAACGAACGAAGTACAAGCT	22	22	61.208	61.056	45.455	45.455	311
338	LInD1-603	Chr01	24331147	22496212	23529204	both	AATAATCCCCCTCTCCCTTGCG	GCACATCTGCACATGCCCTTAT	22	22	61.889	61.592	54.545	50	327
339	LInD1-604	Chr01	24362827	22540735	23573730	both	GCAAAGGCGATGGAATGATCGA	GTGCCACGGTGTCTGTCTTTTT	22	22	61.635	61.832	50	50	319
340	LInD1-605	Chr01	24468989	22646628		Nip./ZS97	TGAAACCAACGTGCTTTGCTGA	CACACACACACACACACACACA	22	22	61.774	61.946	45.455	50	346
341	LInD1-606	Chr01	24517952	22691928	23724587	both	GTCGTTTTAGTCAAGAGCACGGT	GCTACTGGTTACACGGGCAAT	23	21	61.343	61.822	47.826	54.545	348
342	LInD1-607	Chr01	24570944	22745269	23776402	both	TGGTGTGTGTAAGGTCTGTGCA	TTGTGCAGGTGTTCTCGATTGC	22	22	62.065	61.951	50	50	324
343	LInD1-608	Chr01	24592266	22769404	23800503	both	CGCAACCAACAACCCTGATGAG	TTGGGCTAAACAACGCAGTCAC	22	22	62.27	61.892	54.545	50	342
344	LInD1-609	Chr01	24657954	22834568	23865657	both	GCGTCGAAGAAAACGAAAGG	CTGGACCTACACCCAGCCTTAG	20	22	61.935	61.803	50	59.091	345
345	LInD1-610	Chr01	24679509	22856994	23888083	both	CCCATTGATCGCGTCGTAACTG	ACATGGGTGATGCAGACGTACA	22	22	61.918	61.992	54.545	50	327
346	LInD1-611	Chr01	24706250	22883900	23914987	both	AGCCTGCTGACTTTCACCTCTT	ACTCAGATGGCCAAGTGAAGGT	22	22	61.883	61.627	50	50	340
347	LInD1-612	Chr01	24738790		23967911	Nip./MH63	GGTGCTAACCGAAAAGGGGAAT	TTGCCGCTTGCTTAATACCGAC	22	22	60.883	61.818	50	50	347
348	LInD1-613	Chr01	24738987		23968142	Nip./MH63	TGTGGTGCTAAACGAAAAGGGG	TTGCCGCTTGCTTAATACCGAC	22	22	61.331	61.818	50	50	350
349	LInD1-614	Chr01	24750822	22930372		Nip./ZS97	CTGCTTTGTCCCTGGACCCATA	ATGCCTAGATATAACGCGGCCA	22	22	62.018	61.732	54.545	50	333
350	LInD1-615	Chr01	24761885		23987509	Nip./MH63	CGGCGTACTTTCTCCGTTCCTA	GGTGCATCAGCTGTAATCTGGC	22	22	62.081	61.894	54.545	54.545	308
351	LInD1-616	Chr01	24804055		24024475	Nip./MH63	CGTGCGAATTGTTCACCGTGTA	CCGAGAATGGAGCATATAACACTGT	22	25	61.983	60.74	50	44	319
352	LInD1-617	Chr01	24848511	23031554		Nip./ZS97	TTGGCAACCCATGAGGCTCTTA	ACTACCACTGCACTGCTACAGC	22	22	61.961	62.554	50	54.545	324
353	LInD1-618	Chr01	24881006		24112620	Nip./MH63	TCAGCATCCTGATTCCTGTTCCT	AGGTGAGTTCCCCCAATTAACCA	23	23	61.399	61.543	47.826	47.826	300
354	LInD1-619	Chr01	24881503		24113077	Nip./MH63	AGCGCGCTAAACCTCCTACTAG	ATAAGTAGAGCCCGGCCAGAAC	22	22	61.898	61.866	54.545	54.545	301
355	LInD1-620	Chr01	24948819	23132718	24181474	both	ACCCATGCATTGCTACGGAAGA	ACTTTGGTACATCGTCCGTGCA	22	22	62.332	62.49	50	50	302
356	LInD1-621	Chr01	24951409	23135476	24184232	both	ACGGCAGCTCTTATCAGTTGGT	CACATCAGCGAAACCGGACATC	22	22	61.998	62.119	50	54.545	311
357	LInD1-622	Chr01	24954348	23138471	24187227	both	ACGTCTAAATCAGCCAGGGACG	CAAGGACTCGACGGCAAGAAAC	22	22	62.357	61.992	54.545	54.545	303
358	LInD1-623	Chr01	25132926	23310075	24359379	both	TACCTGTGCTCTCCCTCTCCAT	ATGTACCACCCTACACAGAGCG	22	22	62.046	61.789	54.545	54.545	330
359	LInD1-624	Chr01	25150839		24376849	Nip./MH63	AGCCAATTCATGTCTTTGCGGT	AGGGTGAGTAGGGAGGAGGAAA	22	22	61.402	61.66	45.455	54.545	349
360	LInD1-625	Chr01	25162726	23339451	24388732	both	GCGTGTCCCCTCATCTGTATCA	AGGTCAGGTGTATCGAGCGAAC	22	22	61.855	62.089	54.545	54.545	325
361	LInD1-626	Chr01	25250122		24528794	Nip./MH63	TCGCAGCTGCTCTGTACTATCC	AGTGATCTATTGCTGGGCACGT	22	22	61.901	62.064	54.545	50	305
362	LInD1-627	Chr01	25276174		24553800	Nip./MH63	CCGTTGCATATGGGGTACTGGA	TCAAATCATGGCGCTTAGGCTT	22	22	62.132	60.945	54.545	45.455	307
363	LInD1-628	Chr01	25330117	23558362	24607843	both	GCTTGACTTCAGAACGCTGGTC	AGAGTTAACGGTCAACTGACGG	22	22	61.996	60.288	54.545	50	301
364	LInD1-629	Chr01	25380857	23606974	24658595	both	GCACGTAGCTCACACCTACCTA	TGCTCACACATGTGTACTCCCA	22	22	61.519	61.61	54.545	50	350
365	LInD1-630	Chr01	25393089	23619045	24670665	both	CGGTCGAACCCACATCACTCAA	TTTTTGCGAAGGAAGGCAGCAA	22	22	62.798	62.108	54.545	45.455	350
366	LInD1-631	Chr01	25394647	23620468	24672088	both	TGACAAATGAAGCGTCAATGGAGA	TGCTTGCATTTAAACCTTGCGGA	24	23	61.042	62.113	41.667	43.478	300
367	LInD1-632	Chr01	25428179	23654153	24705773	both	CCATAGACGATAGCGAGGCGAA	CTCAACAACCTCCCTCCCTCGA	22	22	62.013	63.392	54.545	59.091	309
368	LInD1-633	Chr01	25453100	23679097	24730704	both	AGTGTAGTGACATGCTCCTCCT	CCACGGCATGGCAAATTAATTCT	22	23	60.559	60.431	50	43.478	319
369	LInD1-634	Chr01	25531783	23766351	24817957	both	GGTTAGGGGGAGAGGCTCTAGA	CTCGGAGGAGGTAAAGATCCCG	22	22	61.843	61.653	59.091	59.091	339
370	LInD1-635	Chr01	25665977	23903174	24954703	both	TGCGACCATGCTCCATTTTTGT	CTCTAGGTGTAGGAGTGGTGGC	22	22	61.659	61.533	45.455	59.091	330
371	LInD1-636	Chr01	25718220		25008264	Nip./MH63	TGAGGGTTGAAACATAGTCATCACA	ACCCCACCATGATCAAATGATGC	25	23	60.222	61.509	40	47.826	331
372	LInD1-637	Chr01	25768041	24006541	25058119	both	GTTGACCCTCTTTTCGTCATCCC	AAGTGGCTCCGTTTACTGTGACT	23	23	61.421	62.067	52.174	47.826	300
373	LInD1-638	Chr01	25770464	24009029	25060607	both	ATGCCAAGTTTGACCACGTCTT	AGTCGACAATGGTTAATCACAGCT	22	24	61.01	60.564	45.455	41.667	311
374	LInD1-639	Chr01	25876650	24112347		Nip./ZS97	AGGAGGCGCTTAAAGCAGAAGA	AAAATAAGGTGGAGGGGAGGGC	22	22	61.998	62.042	50	54.545	328
375	LInD1-640	Chr01	26001198	24147291	25275126	both	TACTAAGTCCCTCGGCGGTTTG	GGAAGGGCGTCAAGAGTCAAGA	22	22	62.041	62.243	54.545	54.545	310
376	LInD1-641	Chr01	26093407		25356515	Nip./MH63	GGAGAGAGAGGGGAAGGAGAGA	TGATATTCGCCCGTATCCCGTC	22	22	61.505	62.03	59.091	54.545	316
377	LInD1-642	Chr01	26309792	24429294	25557197	both	AGGTAAGCTGTAGGCACTTGGG	TAGATGATGACATGTGGGCCCC	22	22	62.009	61.888	54.545	54.545	349
378	LInD1-643	Chr01	26359697	24463572	25591475	both	GTGGAAACCGCCAGCGAAAATA	GAGAGAGAGCTGGGAGGGGATA	22	22	62.018	61.904	50	59.091	318
379	LInD1-644	Chr01	26821262	24880406	26008263	both	AGTCGACAATGTCATCTCAGGACT	ACCAGTTTTGAGAGTGCACATCC	24	23	61.352	61.306	45.833	47.826	318
380	LInD1-645	Chr01	26912545	24950480	26078323	both	CACGTGAAAGGTGTCGACAG	TACGAAGAGCAGATGGGGTGA	20	21	61.668	61.532	54.545	54.545	348
381	LInD1-646	Chr01	27074784	25062951	26190792	both	AGCTAAGCCGTGACATTACCGA	GTTTGCTGCGTCGATCCATGAT	22	22	61.786	61.881	50	50	312
382	LInD1-647	Chr01	27152160	25154189	26282059	both	CGGGCAAATCTGAGGGTGGA	CACCTGACTCCAGATCCAGCAA	20	22	62.197	62.001	60	54.545	300
383	LInD1-648	Chr01	27208600	25208226	26336070	both	ATGAACTCTCACCCAGATCCGC	GGCTCCATCTTTCCCTCTAGCC	22	22	62.12	62.198	54.545	59.091	311
384	LInD1-649	Chr01	27231728	25257459	26385303	both	TCCCAATCCCTTTCTTCTAAAGGCT	GCGCGCCTATCTGTTTCGTCTA	25	22	61.772	63	44	54.545	300
385	LInD1-650	Chr01	27252505	25278283	26406068	both	GTTCAGCCAATCCCATGATGCT	AGCCAGTTTTATCACTGCATGCA	22	23	61.276	61.375	50	43.478	326
386	LInD1-651	Chr01	27288685	25310538		Nip./ZS97	CCCTTGCAATGAACAGAGAGCG	GCGCCGTCTACATTGTTGTCAT	22	22	62.074	61.813	54.545	50	342
387	LInD1-652	Chr01	27504471	25476625	26615355	both	GCAGAAGAACAGTCAGAAGTTGCA	GCCATTGCATGTGTTCCTCGAA	24	22	61.743	62.026	45.833	50	333
388	LInD1-653	Chr01	27511491	25483045	26621775	both	TCACCACTGCACTAACAAAAGCA	GATTGCACAACTCGGGAGATGC	23	22	61.183	62.135	43.478	54.545	332
389	LInD1-654	Chr01	27545042	25510174	26648898	both	GGCTTGAGCAGACCAATGAACC	AGACGACCATGGGCTGAAAAGT	22	22	62.031	62.204	54.545	50	300
390	LInD1-655	Chr01	27561164	25522286	26660985	both	GCCACGAGCTGATCTCTCTCTC	ACACATATCCGTCCATGCCCAT	22	22	62.206	61.888	59.091	50	301
391	LInD1-656	Chr01	27564616	25525714		Nip./ZS97	TAGAAGTAGGGTGTTTGCGAGGG	ACACTAAATGCACGAATCTGGCT	23	23	61.939	60.87	52.174	43.478	300
392	LInD1-657	Chr01	27748067		26864574	Nip./MH63	TTTGGGCGGATATACGAGTGGT	GGCTCACCTCGTTTTGCGTATC	22	22	61.542	62.116	50	54.545	330
393	LInD1-658	Chr01	27938446	25945500	27097462	both	CGAGGCCAGATGGGAAGGTTAT	AGCGGTTTTGAAGGGCAGTTTT	22	22	61.879	61.798	54.545	45.455	313
394	LInD1-659	Chr01	27959599	25966655	27118639	both	CCACGTTCTCCTTGGTCAAAGC	TGCCCTAACATCAGCAGTGTCA	22	22	61.952	61.94	54.545	50	343
395	LInD1-660	Chr01	28010890	26013052	27165038	both	GCGCCATATGCTACAGTCGATT	CGCCAATAGCTGCATGGAAACA	22	22	61.182	62.09	50	50	300
396	LInD1-661	Chr01	28028184	26030867	27182852	both	AGAAAAAGTCAACGGCGTCATCT	CGTGAGATGCGCAACAGGTAAT	23	22	61.05	61.562	43.478	50	331
397	LInD1-662	Chr01	28077237		27219274	Nip./MH63	ATAATAGCGTCGCTCCTCCACC	GCAATGGAAAGTACCTGCGGTG	22	22	61.973	62.331	54.545	54.545	302
398	LInD1-663	Chr01	28090736		27232811	Nip./MH63	ACCCGTTCAATTCACCTACGAGA	AAACGGGACAGTACAACTTGGC	23	22	61.626	61.325	47.826	50	339
399	LInD1-664	Chr01	28168152	26165330	27319296	both	ACTCAACACTCGAACAGTCTGC	TACGAATGGGTTGGACTGAGCC	22	22	60.8	62.316	50	54.545	314
400	LInD1-665	Chr01	28173639	26170789	27324756	both	GTGGTATGAACTCGTGCGCTTC	GACTCCCAGGCTACAAACCAGT	22	22	62.105	61.942	54.545	54.545	318
401	LInD1-666	Chr01	28188077	26185707	27339690	both	GCTTCTCGTACTCTCCATCCCC	CTGACCACATTTGCATGGCCTT	22	22	61.912	61.989	59.091	50	336
402	LInD1-667	Chr01	28222431	26216579	27370566	both	ATTGCATTGCGCTAGCCACTAG	AAGATGCCATCTCCAAGCCGAG	22	22	61.638	62.705	50	54.545	350
403	LInD1-668	Chr01	28275267		27414836	Nip./MH63	AGGGGTGTGTTTGAACTGGACA	TGCGAAAATTGGGAAGCATGCT	22	22	62.025	61.985	50	45.455	349
404	LInD1-669	Chr01	28315522		27455216	Nip./MH63	ACTATTGTCAGATGCACTGCAGC	AAAACCATCACAACTGCCAGCT	23	22	61.481	61.279	47.826	45.455	321
405	LInD1-670	Chr01	28346104		27480961	Nip./MH63	TTTATTCCGCGGGAAGAGAGGG	AGAGCAGACCAACCCAAGAACA	22	22	62.122	61.821	54.545	50	306
406	LInD1-671	Chr01	28370654		27505296	Nip./MH63	GCAACGTCGCGATACCTTGAAT	TTGAGCAACCTGGAACCCTGAT	22	22	61.864	61.898	50	50	304
407	LInD1-672	Chr01	28378123	26368332	27512445	both	ATTCTTTGGTTGGCTGCTCACG	AACACCTCCATTCACGGTTTGC	22	22	61.965	61.906	50	50	305
408	LInD1-673	Chr01	28405780	26395683		Nip./ZS97	GTGTGACTGTTCGATTCGCACG	CATGCAGGAGAGGATCGTCAGT	22	22	62.572	61.853	54.545	54.545	342
409	LInD1-674	Chr01	28439047	26428624	27573323	both	GCGGCATGGTTCTGGTAATCTG	GTCGTGGTTTCAACTCCGTCAC	22	22	61.89	61.925	54.545	54.545	324
410	LInD1-675	Chr01	28464599	26454183	27598883	both	AGGAATGAGCGAATGCCATGTG	AAGGCCCTGTTTGGAGGAGTTT	22	22	61.584	62.109	50	50	335
411	LInD1-676	Chr01	28486713	26475154		Nip./ZS97	CCTGTGTTCCAATCAAACGGTCA	CCTGATGGTGGAATAGCACCGT	23	22	61.549	62.387	47.826	54.545	347
412	LInD1-677	Chr01	28633525		27790230	Nip./MH63	TGCCTTTAGTGTACTGAAGCGC	GCACACCTGGTATTGTTGTCGG	22	22	61.185	62.012	50	54.545	326
413	LInD1-678	Chr01	28662257	26656107		Nip./ZS97	AGAAATTGGATCTGCGCACAGC	ACAGTTAGGGGGAAAATCGCGA	22	22	62.085	62	50	50	309
414	LInD1-679	Chr01	28691202		27855501	Nip./MH63	TACGAAGCACCTAACGTGTGGT	TCCTGTCTGTAGTGCGCTTGAG	22	22	61.909	62.284	50	54.545	327
415	LInD1-680	Chr01	28906373	26928224		Nip./ZS97	CGCTGAACTAAACACAGCCCAA	AATATGTGACTTTGCACGTAGATGC	22	25	61.64	60.221	50	40	310
416	LInD1-681	Chr01	28942108	26964909	28069652	both	TGATACCTCGCGAGTATCAAGC	ACACGGATTGTAAAACGTTGTGTGA	22	25	60.031	61.871	50	40	307
417	LInD1-682	Chr01	29222152	27230040	28327660	both	GGCCGGAGAAGAAGCAACTACT	TGTCTCTTTCGTCCTCTGCTCG	22	22	62.309	62.017	54.545	54.545	341
418	LInD1-683	Chr01	29491604	27469090	28363706	both	AGAGGGCGATGTTCTTCAGACC	GGGCCTCCTTGTTGGTCTAGTT	22	22	62.054	61.953	54.545	54.545	341
419	LInD1-684	Chr01	29494839	27472390	28367006	both	TTGCACATCAGTTGCGCCATAG	AATCCGGTAGTGCATCGTGCTA	22	22	62.079	61.851	50	50	332
420	LInD1-685	Chr01	29623054	27609831	28504432	both	CGAACGTGTCTTGGGGAGGTAA	TTGTTCATGTGTCCGTGCTTGT	22	22	62.233	61.262	54.545	45.455	337
421	LInD1-686	Chr01	29722836	27679921	28574532	both	CCTGATCGTCGGACAGGTAGTC	CGCGCTCTATAAGTAGACGGCT	22	22	61.888	62.004	59.091	54.545	330
422	LInD1-687	Chr01	29964633	28032298	28948511	both	CCGGCTAATCTCCACGTGATGT	CTGTGTGAAAGCGCTTCCTGTC	22	22	62.422	62.248	54.545	54.545	339
423	LInD1-688	Chr01	29972484	28040115		Nip./ZS97	TCATCCAAATCTCGGCCGGATT	CACCTTGAGTGTTCGCCATAGC	22	22	62.137	61.817	50	54.545	338
424	LInD1-689	Chr01	30094844		29080919	Nip./MH63	GGAGTACAAGTTGGCCGTGTTT	AGCCGTACGAACTGCTGGTTTA	22	22	61.325	62.233	50	50	341
425	LInD1-690	Chr01	30158856		29140363	Nip./MH63	TGCATGGCATTTCATTGGAGCA	TCGTGATCTCTGCTGCTCTTGC	22	22	61.737	62.91	45.455	54.545	332
426	LInD1-691	Chr01	30228764		29222098	Nip./MH63	GGTTTTCAACCGGGGCTAAAGA	ACATCCAGATCCGCCGAAGAAA	22	22	61.077	62.059	50	50	340
427	LInD1-692	Chr01	30232521		29225865	Nip./MH63	AAGATCCCTCAGTTGCCTCGAC	TGGCCAGGAGGTGAAGTGTTAG	22	22	62.054	61.941	54.545	54.545	348
428	LInD1-693	Chr01	30335706		29339377	Nip./MH63	GAAGGGAGGGGCCACATAAACT	GCCTGTCGTCACTCCTCTTGAT	22	22	62.031	62.043	54.545	54.545	317
429	LInD1-694	Chr01	30385130		29396393	Nip./MH63	CTTCATCGGCACATTGGGCAG	GGTTTTGGTCTACGTGGCGTAC	21	22	62.209	61.743	57.143	54.545	350
430	LInD1-695	Chr01	30400081		29409070	Nip./MH63	TCCCAGAGTGTGCTGACGAATC	CAACTGCATCCATACCCTGCAA	22	22	62.296	61.207	54.545	50	333
431	LInD1-696	Chr01	30459520		29455639	Nip./MH63	CTATTGTCCCGTGTCCCCTCTC	TGGTATCACGGCGATGGAAAGA	22	22	61.856	61.794	59.091	50	307
432	LInD1-697	Chr01	30504340		29500913	Nip./MH63	ATGCAGCAGGAATCCAGGATCA	GGTCAGATCCACCCAATAGGCA	22	22	61.828	61.821	50	54.545	347
433	LInD1-698	Chr01	30507452		29503984	Nip./MH63	CGCATCTCGGCATGTGATTAGC	TTTTCGTTGCCTTCACCCGTTG	22	22	62.299	62.398	54.545	50	323
434	LInD1-699	Chr01	30517242		29513776	Nip./MH63	TTGTTGCATGTCCATGTTGCCG	GTCTACATGGCAGTGGTGACCT	22	22	62.786	61.998	50	54.545	305
435	LInD1-700	Chr01	30545344		29541874	Nip./MH63	TAGAAATATGCCAGGCCCGGAG	CCTACGACCAAAGTGATCCCGA	22	22	61.941	61.786	54.545	54.545	317
436	LInD1-701	Chr01	30673821		29663380	Nip./MH63	GTGTCTTCCTCCAGACCCCATC	AACACACCCCACCTGAATGT	22	20	62.065	62.092	59.091	50	306
437	LInD1-702	Chr01	30677515		29667058	Nip./MH63	AACCGGGTAAGCTTGCAAAA	TTTGGGATTTGGGGATATGCAT	20	22	61.916	62.027	50	45.833	300
438	LInD1-703	Chr01	30753942		29729915	Nip./MH63	GTCAAGGGGTTCGACTCCATCA	TTGGCAATCTACATTCCACTAGCA	22	24	61.993	60.324	54.545	41.667	328
439	LInD1-704	Chr01	30827281		29797818	Nip./MH63	TTGCCCCTAGCCATGAATCCAA	GGAGTATAGCCGGTGATGGGTC	22	22	62.039	61.984	50	59.091	323
440	LInD1-705	Chr01	30869115		29839664	Nip./MH63	TGGGATTTGTTCACTTGGGGGT	GTCCACAAATCCCTCCACATGC	22	22	62.115	61.783	50	54.545	321
441	LInD1-706	Chr01	31035163		30036149	Nip./MH63	GCCACATGCGTGTACGAGAATT	AGAGTGAAAGGGCAAGAGGGAC	22	22	61.813	61.946	50	54.545	311
442	LInD1-707	Chr01	31064153		30075700	Nip./MH63	CCCAAATGCTAGGATCATGGCC	GATACAGGAGAGAAGGGAGCGG	22	22	61.405	61.657	54.545	59.091	340
443	LInD1-708	Chr01	31118234		30134800	Nip./MH63	GGCAACCTCCATTCACTTCAGC	GCGGTCACATTTCACGCCATAA	22	22	62.031	62.072	54.545	50	302
444	LInD1-709	Chr01	31252462		30238836	Nip./MH63	TGTTCAGGTGACCCTAGATGCC	TTTGTGTGTGTTGTACGTGCCC	22	22	61.745	62.078	54.545	50	331
445	LInD1-710	Chr01	31297363		30287084	Nip./MH63	GGAGTGAATACAAGCATGCAACCA	GATGCATGGGGGCGACAATTAA	24	22	61.877	61.594	45.833	50	330
446	LInD1-711	Chr01	31314084		30303782	Nip./MH63	GCAGGCAGCATCCAAAACTTGA	CTGTGGGCAGAATGTGGTTGTG	22	22	62.233	62.221	50	54.545	327
447	LInD1-712	Chr01	31322242		30311970	Nip./MH63	CTCAAATTTCCGCCCGACACTC	TAAGAAACGGCCGTGTTTGGTG	22	22	62.066	61.888	54.545	50	327
448	LInD1-713	Chr01	31342331		30332245	Nip./MH63	AAGCTGCCACATACTACCTCCG	TGGTGGGTAGCTAGTTGGATCC	22	22	62.115	61.224	54.545	54.545	338
449	LInD1-714	Chr01	31353806		30343659	Nip./MH63	GTGGATATCAGGGCAGCTTCCA	TGTCCCTGCGGAAATACCAAGT	22	22	62.141	61.947	54.545	50	311
450	LInD1-715	Chr01	31393500		30384673	Nip./MH63	TACCGACGTAGACACATGCCAC	GTGGAGACTCGAGAGCACACAT	22	22	62.335	62.032	54.545	54.545	327
451	LInD1-716	Chr01	31418709		30413641	Nip./MH63	TCTCCCTCTCCCAGATCTAGCC	GAGAGGGAGAGGGAAAGGGAGA	22	22	61.904	62.047	59.091	59.091	301
452	LInD1-717	Chr01	31513582		30490944	Nip./MH63	TGGCCTATGCAACTTAGGTGAGA	TCCTTGTGCACATGGTTCCTCA	23	22	61.394	62.147	47.826	50	337
453	LInD1-718	Chr01	31523848		30501245	Nip./MH63	GATAAGGCGCTGGTCTACGGAA	TGTTCATTGGGTGCAGCTCTGA	22	22	62.161	62.465	54.545	50	302
454	LInD1-719	Chr01	31657244		30632668	Nip./MH63	CTCTGCAAATGTTTACAATCGTCCA	ACAATTGAGCGGTTCCCTAAACT	25	23	60.335	60.498	40	43.478	301
455	LInD1-720	Chr01	31696848		30672532	Nip./MH63	CAGAGACGGATGGGCAAGTGTA	AGATCCATCAACTCTTGCCCGC	22	22	62.048	62.958	54.545	54.545	311
456	LInD1-721	Chr01	31699208		30674858	Nip./MH63	TAGCCCCACCCTACCAATCTCT	TTGGCAATCTAGCGCTTTGTGC	22	22	62.064	62.584	54.545	50	326
457	LInD1-722	Chr01	31757435		30732781	Nip./MH63	CTGAGTTTGAGATCGGCGTGTG	ATTCCGCACCGTACAGTGAGTT	22	22	61.798	62.238	54.545	50	325
458	LInD1-723	Chr01	31775217		30751806	Nip./MH63	CCGGTACTCTCTCCGTTTCAGA	GCTGAGGCAGACTCCAACTACT	22	22	61.198	61.731	54.545	54.545	347
459	LInD1-724	Chr01	31845224		30822164	Nip./MH63	GAGAAGGAAAGCGGGCTACAGA	GCGAGTACTCCCTCCTTCTCAA	22	22	62.049	61.206	54.545	54.545	347
460	LInD1-725	Chr01	31856894		30833770	Nip./MH63	AGGCCGCGAAAACTACTCGTAT	CGCGAGGGAGAGAGATCATCAG	22	22	62.096	62.015	50	59.091	323
461	LInD1-726	Chr01	31927655		30965302	Nip./MH63	TCCCGTAACCATGCACAAGCTA	CGGCATTCCAGGCATTTGCTAT	22	22	61.999	61.913	50	50	321
462	LInD1-727	Chr01	32003434		31071981	Nip./MH63	GCACCAGCGTACTTAACCTGC	TCGAACAAAGAATAGCGCGCAC	21	22	61.859	62.349	57.143	50	335
463	LInD1-728	Chr01	32085543	30138812		Nip./ZS97	GCTTCCCTCGCATGAAACATCA	CCGAACGAATCTGCCCTATCGA	22	22	61.516	62.214	50	54.545	343
464	LInD1-729	Chr01	32103221		31164769	Nip./MH63	AGCACATGTTTGACTGTTCGTCT	CATCAGCAGAAAGGCATGCACA	23	22	60.989	62.033	43.478	50	343
465	LInD1-730	Chr01	32202937		31264386	Nip./MH63	GTTGACGGATCGTTCGGAAAGG	TCGCAAATGTCCTCTCTCCTCTG	22	23	61.801	61.99	54.545	52.174	335
466	LInD1-731	Chr01	32255151		31304989	Nip./MH63	GCCGAGTAGGAGTACACTCTTGT	TCCGTCAGTAAACCGTGAGACA	23	22	61.428	61.329	52.174	50	349
467	LInD1-732	Chr01	32512297	30562926	31342875	both	TACTAGTGGCTACGTCACGTCG	CAGTCCGGTCTCCATCGCTTTA	22	22	61.554	62.099	54.545	54.545	309
468	LInD1-733	Chr01	32672936	30716422	31495641	both	ACTTGCTGAAATTGCTGTCTTGCT	TCCAAGATAGGCATCAGCTGTTCA	24	24	62.002	61.909	41.667	45.833	310
469	LInD1-734	Chr01	32685397	30728966		Nip./ZS97	ACCTACCAAAGTACCGGCAAAA	AATCGATCGATTGGCCGGTTCT	22	22	60.159	62.435	45.455	50	333
470	LInD1-735	Chr01	32698784	30742390	31521528	both	TGGGAAGCGGACTAGTGGTTTT	TGTACGGACTGGGCTTGAAACA	22	22	61.881	62.128	50	50	347
471	LInD1-736	Chr01	32785818	30820596		Nip./ZS97	CCCGTTCACTTGCCTTGTTAGT	GGCCGTATCCGTATGAGCAGAA	22	22	61.069	62.226	50	54.545	324
472	LInD1-737	Chr01	32791089	30825818		Nip./ZS97	CCCAAATTCCCAACCAACCTGG	CCGCAATTTCACCACATGTCGA	22	22	61.94	62.011	54.545	50	318
473	LInD1-738	Chr01	32801794		31618755	Nip./MH63	CGTCCGTAAACTATTGGGGTGC	TCGTTAACATCGTCGTGCAGGA	22	22	61.565	62.269	54.545	50	300
474	LInD1-739	Chr01	32829199	30864291	31646223	both	CTTCACCAACCGTTGCCCAAAT	CGTTTCTACGTGACTCGGCAAT	22	22	62.175	61.236	50	50	343
475	LInD1-740	Chr01	32832378		31649454	Nip./MH63	GCGCCACCATACACTGTGAAAC	CGGGTCACGGGTCACATAGATA	22	22	62.566	61.332	54.545	54.545	340
476	LInD1-741	Chr01	32936490	30964236	31746284	both	GCAAACACTCCGATTCTAAAGTCCA	ACAATGCTATGGTTTTTAGGCTGCA	25	25	61.538	61.793	44	40	312
477	LInD1-742	Chr01	32946232	30973817		Nip./ZS97	GCACATGGCTATGATGATCGCC	GGAGGTGGTTGGCAGTAGTTCT	22	22	62.074	61.942	54.545	54.545	303
478	LInD1-743	Chr01	32964147	30991655		Nip./ZS97	TACCTGGCCTCTACATCCAACC	ACCGTTCGCCTTTGAGCAATTT	22	22	61.224	61.906	54.545	45.455	341
479	LInD1-744	Chr01	32975944	31003523	31814260	both	GCGGTAAACTTCCACATGCACA	CCTGCCTCAATCTCTCCCCAAT	22	22	61.957	61.829	50	54.545	318
480	LInD1-745	Chr01	32988357		31826584	Nip./MH63	TGCATCCAAAGCTTTGTTGAGCA	CGCCTTCAGATATCGGGATAGCT	23	23	62.057	61.742	43.478	52.174	340
481	LInD1-746	Chr01	33164496		31958205	Nip./MH63	AGATCGTGCACTACCGACAAGT	TCCCATTGCATGAGAGGTGGTT	22	22	61.715	61.965	50	50	339
482	LInD1-747	Chr01	33280162		32085905	Nip./MH63	AGGCACAACCACCATTAAACCA	TGCTTTTGAGGAAGTTCGGTGC	22	22	60.691	61.896	45.455	50	348
483	LInD1-748	Chr01	33294870		32100608	Nip./MH63	TCCCCATGCAGCTTACAAGGAA	AAGTCAATCTTAACGCGCCTCG	22	22	61.961	61.552	50	50	306
484	LInD1-749	Chr01	33469396		32273168	Nip./MH63	GCAAAACTTCCACTCTCTGCCC	GGTAAGAGAACGCTGCATGCAA	22	22	61.966	61.761	54.545	50	307
485	LInD1-750	Chr01	33474500	31490055		Nip./ZS97	TGGCAAACAGTCGGAGGTACTT	TCAAAGCGCGGGTCATCATCTA	22	22	61.871	62.109	50	50	350
486	LInD1-751	Chr01	33478647		32282263	Nip./MH63	GCAGAGACGCGGATACATTTGC	GCTTGTGGCAATTGGGCTCATA	22	22	62.482	61.791	54.545	50	350
487	LInD1-752	Chr01	33603935		32332540	Nip./MH63	TCGTTGCTGCCATCATTGTGTC	GCATCCATTATAAGCCGAGCCG	22	22	62.015	61.817	50	54.545	313
488	LInD1-753	Chr01	33964219		32428029	Nip./MH63	CAAGCAGACTAGTCCACGTCGA	GGGCCGTACTTCAGTCGAGATT	22	22	62.013	62.1	54.545	54.545	312
489	LInD1-754	Chr01	34259194		32702395	Nip./MH63	GAAAAGCTGGTCGGGTCGAAAC	CTCTCGCTCCTGATCTCCATGG	22	22	62.251	61.974	54.545	59.091	317
490	LInD1-755	Chr01	34322466		32771803	Nip./MH63	TTTGGGCCCAATTTGAGCTGTG	AACTACCGATGTGATGCCACGT	22	22	62.19	62.303	50	50	349
491	LInD1-756	Chr01	34524871		33065184	Nip./MH63	CTGATCTGATTTGGCGCCGTTT	GCGAAGGCCGAATCTGTGAATT	22	22	62.081	61.826	50	50	301
492	LInD1-757	Chr01	34547525		33085724	Nip./MH63	TGTTGCAAGGAGCTAGCTGAGT	TGAAATCTAAGCCAGCCGAGCT	22	22	61.935	62.064	50	50	343
493	LInD1-758	Chr01	34555008		33093425	Nip./MH63	AACTGCACATGACCATGGTCCT	GTCTTCACATGGAATCGGCAACT	22	23	62.22	61.423	50	47.826	342
494	LInD1-759	Chr01	34578148		33116629	Nip./MH63	TTGTCCGAGTTGAATGTTGGCG	TCAGCTTCTCCCCCTTCTCTCT	22	22	61.947	61.983	50	54.545	315
495	LInD1-760	Chr01	34651759		33183651	Nip./MH63	TGGACGGAGGGAGTACAGTTCT	AGTCCAAACTTAACTCACACGTCG	22	24	62.225	61.261	54.545	45.833	335
496	LInD1-761	Chr01	34659964		33191783	Nip./MH63	GCAAAACCGCCATTGAAAACCA	CCCTCCTCTTTGGGCTGACATA	22	22	61.317	61.492	45.455	54.545	348
497	LInD1-762	Chr01	34666771		33198264	Nip./MH63	GGGATTACTGGCCGTCAAGAGT	ATTGAGTATCGTTTTCCGCGCG	22	22	62.06	62.164	54.545	50	339
498	LInD1-763	Chr01	34685926		33218162	Nip./MH63	GGTGAAGGCGGCAGTTATTTGT	GAAATCTCCTGGGTGCAGTGCT	22	22	61.714	62.847	50	54.545	335
499	LInD1-764	Chr01	34699648		33231939	Nip./MH63	TGTGTACTTGCCATTCTAGCTTTGT	CCACCTTAGCCGATCTCGTTGA	25	22	60.977	62.099	40	54.545	345
500	LInD1-765	Chr01	34767126		33300089	Nip./MH63	AGCCTGCTCCAGTCCATATCTG	TCATCGGCAAGGCAATCAACTT	22	22	61.613	61.141	54.545	45.455	340
501	LInD1-766	Chr01	34770276	32600772		Nip./ZS97	TCCAACTGTGTCTGCAGCTTCT	CAGTGCAGGCTTTAGGTTTGCA	22	22	62.13	61.909	50	50	302
502	LInD1-767	Chr01	34857543		33389500	Nip./MH63	TGCATCGTCGTGTACAGTCTCT	GCGTATAGCCACGTAGGACGAA	22	22	61.449	62.194	50	54.545	341
503	LInD1-768	Chr01	34895063		33427078	Nip./MH63	AGCTACAGATCCAAAAGGCGGT	TGGCTAGCTCACCGTTCATGAA	22	22	62.009	61.992	50	50	313
504	LInD1-769	Chr01	35063133		33597267	Nip./MH63	TGGTGCTACTACCGGCAAGAAG	ACCATGCACGGTAACCTTTTCG	22	22	62.303	61.702	54.545	50	300
505	LInD1-770	Chr01	35134768		33675239	Nip./MH63	AGGTCCTTCAACTTGACGTC	TCGAACTTAAGCCTGAGTCG	20	20	61.592	61.138	50	50	313
506	LInD1-771	Chr01	35201360		33745557	Nip./MH63	TTAATGGGAGGCGTGAAAGTGG	GGAAACGTGTAGGGATGGAGGG	22	22	60.878	62.383	50	59.091	323
507	LInD1-772	Chr01	35218740		33754984	Nip./MH63	CTCTGTTGCTTGACACGATCGG	ATTTGTCCGCTAGTTTTGGCCG	22	22	61.798	62.022	54.545	50	349
508	LInD1-773	Chr01	35249445		33787190	Nip./MH63	AGGTGTTGCAAAATAACCGCTCA	ATTGACTACGTGGCAGCGATCT	23	22	61.557	62.104	43.478	50	350
509	LInD1-774	Chr01	35376470		33884932	Nip./MH63	GAGGCGCGCAATTCGAAATCTA	GCCCAAACTATAAGCCATGCCG	22	22	61.928	62.218	50	54.545	318
510	LInD1-775	Chr01	35376989		33885492	Nip./MH63	ATCGAGAAGGCATGAACTTGTCT	ATGACAGTACTGCAGCGTCACT	23	22	60.056	61.977	43.478	50	336
511	LInD1-776	Chr01	35637850		34140877	Nip./MH63	CCGGTGTGGTCGTGATGATATAT	GCGTGTGAACTGTTCAATTTTGTCA	23	25	60.057	61.403	47.826	40	300
512	LInD1-777	Chr01	35757792		34263083	Nip./MH63	GAGTGACACATTTTTGCGTTGACA	GATGGGTACGCTTGGCTTTGAG	24	22	60.963	61.826	41.667	54.545	341
513	LInD1-778	Chr01	35777654	33640553		Nip./ZS97	TCGTAGCTCCCAACTGGATGTG	CTCCGCTTGGCAGTATCGATGA	22	22	62.048	62.474	54.545	54.545	329
514	LInD1-779	Chr01	35798547	33660670		Nip./ZS97	GAGCCGAGTATCCTAACCAGCT	AGTCAATCTGGGCTCGCTATCC	22	22	61.338	61.926	54.545	54.545	302
515	LInD1-780	Chr01	35837850	33700191	34355894	both	GCGCCCACTTAGTTCTCTCTCT	TGTGTTCTTTGGTTGGGGTTTGG	22	23	61.785	61.947	54.545	47.826	345
516	LInD1-781	Chr01	35858531	33722235		Nip./ZS97	TGTCACCTAAGGGCATCACCAA	TGTATGACGTGACTCATCTTAGGGT	22	25	61.628	61.097	50	44	338
517	LInD1-782	Chr01	35913065	33779546	34435278	both	AAGAAGGGCCAAGGAGAGGAAC	ATCTTCCGGATGCATGCAACAC	22	22	61.957	61.838	54.545	50	348
518	LInD1-783	Chr01	35930358	33812005	34455183	both	TGGAGGTTCCATGCTGGCTTAA	AGGGATGGCAAATTGTACGTAAGC	22	24	61.961	61.697	50	45.833	300
519	LInD1-784	Chr01	36147637	34044268	34687442	both	CTCCTTTCTCCCCCTTTCCTCG	TGCTCTTCTTTGGTGAGGGAGG	22	22	62.065	61.945	59.091	54.545	303
520	LInD1-785	Chr01	36232010	34132958	34776171	both	GAAGGGAGAGAAGAGGGGAGGA	TCGTAAGCCAAGGCCCATAACA	22	22	62.047	62.01	59.091	50	309
521	LInD1-786	Chr01	36294575		34838278	Nip./MH63	ACGGGTGTCCTAATAAAAGGAGCA	AGCACATCAACAGATTTCTCCATGA	24	25	61.85	60.805	45.833	40	308
522	LInD1-787	Chr01	36298540		34842284	Nip./MH63	TCTCGCAACAACACAGAGCATG	TTCTACTAGTGGACGGGGGAGT	22	22	61.69	61.703	50	54.545	346
523	LInD1-788	Chr01	36351451		34890044	Nip./MH63	TGCCAAATTCCTGTAGTCATTGCT	TTTGCAATGGAGTATGCGGTGG	24	22	61.053	61.778	41.667	50	340
524	LInD1-789	Chr01	36365975	34273671	34904630	both	ACAACAACGCTGATCATGGACG	AGAGTAGGGTGGTATGCGTTCG	22	22	61.752	61.842	50	54.545	316
525	LInD1-790	Chr01	36374283	34281991		Nip./ZS97	TCGTCGGTGAAGGATGGGAAAA	AGGAGGGGAAGAAGAGACCG	22	20	61.933	62.047	50	54.545	328
526	LInD1-791	Chr01	36380585	34288333		Nip./ZS97	GAGCTCGGACTTGTCCTCTTGT	GCAAATTCCCCATCACGGTCAA	22	22	61.978	61.722	54.545	50	324
527	LInD1-792	Chr01	36597189	34461884	35093844	both	TGAACCACCCAGATTGATCCGG	GTACGGGCCAGTTTGGTTTGAG	22	22	62.332	61.958	54.545	54.545	320
528	LInD1-793	Chr01	36793678		35307342	Nip./MH63	TTGAAATTTGCATGAACAGGCCCT	TGGAATGCACTACTCCCTCTGT	24	22	62.027	60.827	41.667	50	300
529	LInD1-794	Chr01	36817565	34705183	35331164	both	TTGGTCGGTATCCTACGCCTTG	TGTACAGAGTGTGGCCAATCGT	22	22	62.106	61.927	54.545	50	322
530	LInD1-795	Chr01	37016840		35473145	Nip./MH63	CGGGGAAATTCCGGTGATCAAT	AGAGGACGGGATGGGATTGAGA	22	22	61.01	62.378	50	54.545	322
531	LInD1-796	Chr01	37032097		35488336	Nip./MH63	TCGGTGTGGTCAGAACGAGATC	AGGAACTCAATACAGCCGCCTA	22	22	62.024	61.218	54.545	50	332
532	LInD1-797	Chr01	37033240	34870954		Nip./ZS97	CTTTCCGTTGGCTGCTTCAACT	GGTGTCCAGTTCAGGTGAGTGA	22	22	61.9	61.865	50	54.545	306
533	LInD1-798	Chr01	37033487	34871244		Nip./ZS97	CAACTAGACAAGCACAACCCGT	TTCGAGATGCGCATTTTGAGCC	22	22	61.063	62.383	50	50	309
534	LInD1-799	Chr01	37055265	34895758	35514325	both	AGGCTCTATTGGGGAGATACTGT	TGGCCTTCTGATTCCGACGTAT	23	22	60.117	61.537	47.826	50	300
535	LInD1-800	Chr01	37193114	35025606	35644424	both	TCCTCAGTCCACAAACGTAGGC	AAGATTGTGTATGCGCGCAACA	22	22	62.238	62.011	54.545	45.455	322
536	LInD1-801	Chr01	37273663	35087722	35693654	both	CCGGAGAGAGGGTTTGTCTGAA	ACATGACGATACAGGCTCAGCT	22	22	61.67	61.535	54.545	50	345
537	LInD1-802	Chr01	37329351		35746719	Nip./MH63	CGTTGTGCGGCTAAAAGGACAT	GGCCCAAACCGATCACAACAAA	22	22	62.012	62.17	50	50	342
538	LInD1-803	Chr01	37390687		35829549	Nip./MH63	AAAGATATCCGGTGCGTGCAAC	GCGGAGGAATTGAATAGGAGTGC	22	23	61.822	61.6	50	52.174	315
539	LInD1-804	Chr01	37449783	35257035	35893357	both	ATAAGCAGGATCATGGGCCTCC	TGCCACCTAAACGCCACGTATA	22	22	61.96	62.046	54.545	50	304
540	LInD1-805	Chr01	37470678	35278011	35914331	both	TAGGAGGGGAGATCGATCGGTT	ATGGATGGATTGCGTAGGGGAG	22	22	61.896	61.945	54.545	54.545	312
541	LInD1-806	Chr01	37533776	35337890	35960763	both	TGACATCTCCGGTCACTGAACG	TGTTTGAATGGGGTGGATGGGA	22	22	62.279	61.914	54.545	50	349
542	LInD1-807	Chr01	37551753	35355849	35979156	both	AAAACCCGGCAAACCAGAAAGG	ACTGCGTCCATCTTGCAAAAGG	22	22	62.121	61.965	50	50	334
543	LInD1-808	Chr01	37580282	35384451	36007761	both	TGGTAAAACCAGCCCACCCAAA	TGGATCTCCTCGGAAAGTCGATG	22	23	62.64	61.801	50	52.174	324
544	LInD1-809	Chr01	37584049	35388306	36011618	both	TTCAGGCTGAGCTTGCTGTACT	GCAACAGTGGCGGTAGTTCTTC	22	22	61.935	62.003	50	54.545	324
545	LInD1-810	Chr01	37621348	35434279	36057622	both	GAAAAGGTATCACAGCGAGGCG	GGATTCGAAGGTTTGTGCTCCG	22	22	61.868	62.066	54.545	54.545	306
546	LInD1-811	Chr01	37706961	35516402	36139744	both	ACGGAATGCTTTGACCAGAACT	TTTCAGGAACTTGGTCCAGCCT	22	22	60.487	61.831	45.455	50	305
547	LInD1-812	Chr01	37910995	35739108		Nip./ZS97	TCCCAGTACTAACCAAACAAACCA	CGATCCCTCGCATATCTTCGGT	24	22	60.08	62.028	41.667	54.545	309
548	LInD1-813	Chr01	38116678	35961473	36436351	both	CCTCTTCTTCCAGCCCTTACCC	TGGTTGAAGGGGAGGTTGCTG	22	21	62.076	62.556	59.091	57.143	316
549	LInD1-814	Chr01	38120972	35965828	36440698	both	GAGCAAGGACCTCATCGTTTGC	AATTGTCATAGCATCGCCCAGC	22	22	62.071	61.646	54.545	50	343
550	LInD1-815	Chr01	38150682	35998069	36472890	both	GCTAGCGAACACTGAAAGCTCC	ATGCGGATTCCCAGCGCTATAT	22	22	61.808	62.064	54.545	50	305
551	LInD1-816	Chr01	38169459	36017216		Nip./ZS97	GTGGTCGCACTGTAACGTGTTT	CGACCGACGGACCAACCTAATA	22	22	61.87	61.835	50	54.545	334
552	LInD1-817	Chr01	38181941	36027978		Nip./ZS97	GGGCGAACAGAACATGCTCAAA	ATTAATCCGCGTCGTCAGGAGT	22	22	61.961	61.842	50	50	321
553	LInD1-818	Chr01	38210283	36056445	36541831	both	CCAGGGGTGTCCTCTATTGCAA	AATGCGGTGTCATTAGCTGCTG	22	22	62.018	61.829	54.545	50	334
554	LInD1-819	Chr01	38338612	36193928		Nip./ZS97	TCTCGGTGCACATTCTCCCAAT	AGCAGTGGTAGGAGTGGTTGAG	22	22	62.007	61.673	50	54.545	333
555	LInD1-820	Chr01	38454608	36309317	36787686	both	TCGATTGGGACGAGGAAGAT	GGACAGAGGAAGTACTAGCGGC	20	22	61.595	62.155	54.545	59.091	303
556	LInD1-821	Chr01	38463223	36318004	36796373	both	TGCTACCCATTACCTCTTGCCG	TCACCCTAGTCGACACTCAGGA	22	22	62.381	61.948	54.545	54.545	300
557	LInD1-822	Chr01	38468285	36319948	36798316	both	GGAGATCACCGTAAAACGTGCA	TGGGATAATGGTGGGGAGAGGA	22	22	61.183	62.075	50	54.545	341
558	LInD1-823	Chr01	38517078	36372219	36850589	both	TGCCGAATGGAGTTTTGAGCAG	AAACCGTCAATGTTAACGCGGG	22	22	61.708	62.257	50	50	336
559	LInD1-824	Chr01	38616289	36468249		Nip./ZS97	TCGTCAGGTGATAAGGCCGATC	ACGTTAATTGTGCGCCCCTTTT	22	22	61.907	61.912	54.545	45.455	332
560	LInD1-825	Chr01	38799862		37135401	Nip./MH63	ATCATGAGCTCCGGATGCAGTT	TCGACTGTAAACTGCGAGACGA	22	22	62.135	61.69	50	50	315
561	LInD1-826	Chr01	38903069		37233476	Nip./MH63	TCAATGGGCGTTTGGACTCGTA	ACAAGGTGATACGGCTTCATAACA	22	24	62.244	60.323	50	41.667	340
562	LInD1-827	Chr01	38920496	36789813	37250918	both	CGTCTGTCTCCACCTCCACAA	ACATGAGCAATCGAACAGAGGT	21	22	62.176	60.028	54.545	45.455	302
563	LInD1-828	Chr01	38951420	36819314	37280425	both	TAGGTAGAGGCGAGTAGTGGCT	GAGGGAGGATAAGGATGGCCAC	22	22	61.819	61.946	54.545	59.091	310
564	LInD1-829	Chr01	39020014	36888613	37349727	both	TGACCAAGGCAGTAGTGTAGCT	TTTCTCCGGCGATATGATGCGA	22	22	61.086	62.225	50	50	307
565	LInD1-830	Chr01	39033809	36902223	37363300	both	AGGCAAGCTACCAGCATTCTCA	TGAGTTGCACTGGTCATTTGGT	22	22	62.012	60.686	50	45.455	312
566	LInD1-831	Chr01	39106261	36974796	37436647	both	AACTTGCTCTAAGGACATCCACAA	GGTAGTAACGTGGGCCCAAGAT	24	22	60.202	62.067	41.667	54.545	339
567	LInD1-832	Chr01	39154760		37485790	Nip./MH63	GGCTCATCCAAATCCTAGGCCT	GTCTAGGAGACCGTCGGTGATG	22	22	61.893	61.888	54.545	59.091	340
568	LInD1-833	Chr01	39211277	37088232	37550113	both	CATGATGGCAGGTCAAACAGGC	GAGGTGGACTTGGTTTTGCAGG	22	22	62.352	61.91	54.545	54.545	324
569	LInD1-834	Chr01	39226716	37103965	37565847	both	AGGAATAATGGAGAGTGGCGGA	TGAACATACTCCTCGTCAGATTCGT	22	25	60.96	61.604	50	44	321
570	LInD1-835	Chr01	39232518	37109790	37571672	both	ACCAACGAGGGCAATATCGGAA	ACCCGTCAGTTGCTTCTACGTA	22	22	62.066	61.395	50	50	331
571	LInD1-836	Chr01	39250393	37128183	37590074	both	CAACCACCAGCAGCCAAGTG	ATGACGTTAATCCCACGGAGCA	20	22	62.079	62.055	60	50	343
572	LInD1-837	Chr01	39316069	37205972	37667847	both	GTGTGTTCACGTGTAAGCGAGG	GCAGAGGGAAACGGTCTAGCTT	22	22	61.978	62.309	54.545	54.545	314
573	LInD1-838	Chr01	39353554	37238856	37700731	both	CTACCACCTTGACTGCGACGAG	GTGAGTAGCGAGACCGAGAGTG	22	22	62.884	62.121	59.091	59.091	350
574	LInD1-839	Chr01	39363984	37249465	37711337	both	GTGAAATCTTGCGTGCGATCCA	TGCCATTAGGTGTACACGACCA	22	22	62.065	61.671	50	50	339
575	LInD1-840	Chr01	39432943	37315964	37777839	both	CAATCAGAATCTGGGCAAGGGC	GGGGATTGGGTTGATCTTCCGA	22	22	61.852	62.082	54.545	54.545	316
576	LInD1-841	Chr01	39477810	37370101	37831989	both	ATCCCAACCGGTCTCACCTTTT	TCCTTTGTTAGACTAGCGGCGG	22	22	61.895	62.352	50	54.545	330
577	LInD1-842	Chr01	39591514	37476866	37938673	both	TCCTGAGTGTGTTTGGACGGAC	GCTGATTTCTGCACTCCAAGGC	22	22	62.43	62.341	54.545	54.545	350
578	LInD1-843	Chr01	39719450	37631989	38093788	both	ACTAAACCAAGTGCTAGCCCGT	GGCCTGTTCACTTTGATGCCAT	22	22	61.938	61.729	50	50	315
579	LInD1-844	Chr01	39722344	37634589	38096390	both	CCAGGAGACATGGAGCTAGAGC	CTCTCAAAACGCCACGTAACCC	22	22	61.919	61.998	59.091	54.545	304
580	LInD1-845	Chr01	39824124	37736655		Nip./ZS97	GCTCGCTCTCTCGTCGATCTTA	AGGGCGCTGTATTCGGATTACA	22	22	61.681	61.861	54.545	50	301
581	LInD1-846	Chr01	39840889	37752691	38226264	both	TGGAACATCAGTTATGGGCGAA	ACCTCGTGCAATGAAGTCATGA	22	22	60.027	60.29	45.455	45.455	312
582	LInD1-847	Chr01	39951991	37863866	38337478	both	AAAGTAGAGCGAGGTTGGACGG	CAAGAACACAGCTGCGGTTCAT	22	22	62.292	61.955	54.545	50	305
583	LInD1-848	Chr01	40195444	38094434	38568118	both	GCTGTGCACATTTTGTCCGCT	GGCCACAACCATTCTTTCGT	21	20	62.265	61.906	50	50	337
584	LInD1-849	Chr01	40207283		38576480	Nip./MH63	ACACGTGCAGAAAATAGTACTCCA	GCAAGGCCGCATACATTTCCTA	24	22	60.262	61.327	41.667	50	350
585	LInD1-850	Chr01	40653725	38185720	38648721	both	TCTCCTTTTGCACCTCCTGACC	CCTAAAGTGTTCAGCTGCACCG	22	22	62.204	62.006	54.545	54.545	345
586	LInD1-851	Chr01	40689467	38221523	38684523	both	GTGGATCTCCTCTGATACCCGC	GGTGGATGCTAATGCTGCCTTG	22	22	61.978	62.161	59.091	54.545	345
587	LInD1-852	Chr01	40743317	38279817	38742883	both	TTCAAGATGCAGAAGGGAGG	GTTGGGCTGTTGGCATCAATG	20	21	62.6	62.245	54.545	50	338
588	LInD1-853	Chr01	40746005	38282536	38745602	both	AGGTATCGGGTAACATGCAGGT	TGCATGTAGTCGTCACATCTCGA	22	23	61.224	61.726	50	47.826	335
589	LInD1-854	Chr01	40799042	38335693	38798774	both	GAAAGGGCGTGGGTTCAAAT	CGCAATGAGGTGACGAAACA	20	20	62.291	61.688	54.545	50	341
590	LInD1-855	Chr01	40814317	38352616	38815704	both	ACATGACAAGAGGGCGAGTGAA	AATGAGATTGGGGCAGGTTGGA	22	22	61.931	61.976	50	50	345
591	LInD1-856	Chr01	40820405	38359008	38822095	both	GCTCAGGCCTATCTACAGGAGC	TATTTCATTCCCGTGCACGTGG	22	22	61.982	61.51	59.091	50	323
592	LInD1-857	Chr01	40832748	38373418	38836507	both	ATAAGTACCAGTGCCACGCCAT	AAGCAGTGGATTATTGGGGCCA	22	22	62.071	62.307	50	50	329
593	LInD1-858	Chr01	40840127	38380810	38843910	both	AACCAGTGATCGGACTGCTGTT	GCTGCAGCTGTTCTGAAATGCT	22	22	62.192	62.28	50	50	330
594	LInD1-859	Chr01	40850291	38391385	38854479	both	GCTTTGCTCTCGTTACCGATCA	TGGCCCGGTAGTAAATTATATCCGA	22	25	60.989	61.278	50	44	345
595	LInD1-860	Chr01	40936439	38550777	39005332	both	CTGTTCGCCGATGGATCATGTG	AGGGCCATTTTGGTTTGAAGCT	22	22	61.935	61.293	54.545	45.455	338
596	LInD1-861	Chr01	41124887	38736472	39202690	both	CCCGCCAATGTTTCACTAGCAC	GACCTCAACCACCGTAGACGAA	22	22	62.331	61.965	54.545	54.545	346
597	LInD1-862	Chr01	41199742	38820814		Nip./ZS97	ACTCCGTAGTGCATCATCAGGA	GTTTCGAACACAGCCAAGTCGT	22	22	60.95	61.874	50	50	346
598	LInD1-863	Chr01	41292913	38919101	39389942	both	ACAAGTGGTCAAACAGTGCAAACA	CAAGGATGGAGGAAGTATGTATGCT	24	25	62.06	60.222	41.667	44	338
599	LInD1-864	Chr01	41296356	38922551	39393394	both	GCTAGCTGTAACACGGACTCCA	GCATGCACGTTTCCCGAACTAC	22	22	62.034	62.612	54.545	54.545	327
600	LInD1-865	Chr01	41324815	38951286		Nip./ZS97	ACGTTTTGGACAAGTTTGAGGTCA	GACCGGTAAACATCAGGGGAGT	24	22	61.344	61.742	41.667	54.545	327
601	LInD1-866	Chr01	41382043	39005276	39476149	both	GCAGCGTCGTAATAGAATCGGC	TGGCGGTTTGGACGATGTTTTT	22	22	62.032	61.846	54.545	45.455	344
602	LInD1-867	Chr01	41384174	39008637	39479510	both	CGTCGGTTGGAGAGAGAGATGG	AGTCCGATTTTCGTCCCCTGTT	22	22	62.147	61.938	59.091	50	346
603	LInD1-868	Chr01	41388710	39013343	39484215	both	TGCTACTCCCACATCTCGCTTG	TGGTTTCTGCCTTACGTTGCAC	22	22	62.361	61.892	54.545	50	336
604	LInD1-869	Chr01	41580237	39077595	39548471	both	AGCCAAGCTACGAATAAACCAGT	ATACTGCCTCAAACTCCAGCGG	23	22	60.307	62.633	43.478	54.545	344
605	LInD1-870	Chr01	41734335	39171542		Nip./ZS97	GCCAACAAGCAAACGATAGAGCT	CATGGCCACCGTTACGACTTAC	23	22	61.966	61.557	47.826	54.545	303
606	LInD1-871	Chr01	41747180	39184477	39655324	both	TCATCCATGCTTTGCCCCCATA	ACGGTGTCAAACATTTAGGGAAGG	22	24	62.107	61.286	50	45.833	306
607	LInD1-872	Chr01	41815734		39699419	Nip./MH63	ACGGAGGGAGTACAGCAGATTG	GGAACGCTTTCTACCACGATTGG	22	23	61.793	62.011	54.545	52.174	325
608	LInD1-873	Chr01	41842921	39251798		Nip./ZS97	CGGATCGCTAAACTCTTGACGG	TGGACAAGTCATGTTTGAGCAGT	22	23	61.357	60.685	54.545	43.478	309
609	LInD1-874	Chr01	41898689		39781933	Nip./MH63	ACAATACCACTCCCTCCATCCC	AGCTGGGTTTAGGTTGCTCCAT	22	22	61.233	61.967	54.545	50	336
610	LInD1-875	Chr01	41907224	39316283		Nip./ZS97	TTTTGCGCGCACGTTTTTCA	GCTGTACGTAAACCACTCGCAC	20	22	62.041	62.038	40.909	54.545	318
611	LInD1-876	Chr01	41947903		39835896	Nip./MH63	AAGAATTACTCCCTCGTTCCCAA	CCGAACGGGCTACACAATTCTT	23	22	60.457	61.191	40	50	340
612	LInD1-877	Chr01	41958242		39845522	Nip./MH63	TTTGCTTGCCGTTTCCTATCCA	TCCCGATCCTGCTTTTGTGAGT	22	22	60.816	61.941	45.455	50	319
613	LInD1-878	Chr01	42157585		40094724	Nip./MH63	ACAAACGGTTCATGGGCGAAAA	ATTTGGTGGTGAGCAAGGCAAC	22	22	61.846	62.179	45.455	50	308
614	LInD1-879	Chr01	42162090		40099730	Nip./MH63	GGCGCCCATGCTCCATTTATTT	TTTGCGCCCTTTGAACTCATCC	22	22	62.179	61.971	50	50	332
615	LInD1-880	Chr01	42300556		40232065	Nip./MH63	TCCCCCGCATCTCCATTTTCTT	ACAACCGTTGTGACCTGTGAAC	22	22	62.029	61.51	50	50	303
616	LInD1-881	Chr01	42408461		40406272	Nip./MH63	GCAAGATCATGGGCACAACGAT	TGGCTGCCGATCGATGCATA	22	20	61.838	62.047	50	50	303
617	LInD1-882	Chr01	42418038		40415871	Nip./MH63	AGTTGCTCTGTTCCTTTCCG	GCCCCCATGCCTGCAAAATTAT	20	22	62.454	62.14	50	50	335
618	LInD1-883	Chr01	42527474		40506988	Nip./MH63	CATCAGGATGTTCTGCGGCTTC	TTGGGCAAAACGGATCGTCATC	22	22	61.884	61.766	54.545	50	350
619	LInD1-884	Chr01	42911761		40872741	Nip./MH63	CTGGAACGCAAGCCAAAGGAAT	TCTCCTTGTTATGCCACCACGT	22	22	61.976	61.937	50	50	328
620	LInD1-885	Chr01	42918945		40879934	Nip./MH63	GCAGTGGAGTAGTGGAGTGTGT	CTTGGCGGTGATCGAGGTTAGA	22	22	61.921	62.099	54.545	54.545	342
621	LInD1-886	Chr01	42929126		40889182	Nip./MH63	ACAAGGGACGACTTCTCCTTTCT	AGCTCTGACGAGTACTCCATGG	23	22	61.262	61.268	47.826	54.545	336
622	LInD1-887	Chr01	43047046		40966433	Nip./MH63	CATTCCATGGCAGCTGCTATCG	TCTTCCTTCTCTGGCCTTGTCG	22	22	62.013	61.987	54.545	54.545	330
623	LInD1-888	Chr01	43078311		40997674	Nip./MH63	CCCGCACAGAGAAGACAGAGAG	CAAAGATGGTGGTGTTGGAGGC	22	22	62.342	61.976	59.091	54.545	330
624	LInD1-889	Chr01	43109994		41035110	Nip./MH63	ACTAGAAGAGGGCGGCTGTTTT	CCAGGGGAAAACTGACCGTACT	22	22	61.942	61.938	50	54.545	314
625	LInD1-890	Chr01	43199808		41136621	Nip./MH63	CCGTCTAGCTCAGTCGGTAGAG	GGCGGGAAAGGAGATCAGGAAT	22	22	61.374	62.143	59.091	54.545	350
626	LInD1-891	Chr01	43238688		41173740	Nip./MH63	CCACTGTGGAGATGGAGACTCG	TCGATGTGACACGCCAAAACTT	22	22	62.097	61.318	59.091	45.455	300
627	LInD2-167	Chr02	67641	29273		Nip./ZS97	AGAAAAACAATGACGCCCCAGG	GTGCATGGGCCCATCAATCAAT	22	22	61.66	61.871	50	50	344
628	LInD2-168	Chr02	124704	85470	59669	both	TGATGACCTGGCAGCTTAGCTT	GTTTCATAGGGAGGCGCCATTG	22	22	62.012	61.9	50	54.545	342
629	LInD2-169	Chr02	221973	174971	149197	both	GCGATGGCTCCCTTTCTCAATC	TTCATGGAGGAGGAGGAGGAGG	22	22	61.639	62.383	54.545	59.091	328
630	LInD2-170	Chr02	247834	187747	161974	both	AAGCCCGAGATGACACCTTCAA	CACCCTCCCATCTAGTTGAGCC	22	22	61.941	62.131	50	59.091	325
631	LInD2-171	Chr02	291034	219976	194205	both	AATGGGAACTGGTCCTGATGGG	AACAAGAAGACAGCTGGCAAGG	22	22	62.034	61.333	54.545	50	350
632	LInD2-172	Chr02	301739	229279	203511	both	ATCCAGATGAACTACCGGGCTC	GCATGGTTACCAATCGTCACCC	22	22	61.607	61.832	54.545	54.545	350
633	LInD2-173	Chr02	494488	406627		Nip./ZS97	TCCTACTCGTACGCCTCAATGC	CGAGGAGACGACAGCTAGCTAC	22	22	62.149	61.934	54.545	59.091	334
634	LInD2-174	Chr02	712822		580411	Nip./MH63	TTCTTCCACCAGTGATGAGCGT	GTGGCCTCTCAAGTTGATTGGC	22	22	61.931	62.031	50	54.545	341
635	LInD2-175	Chr02	713937		581578	Nip./MH63	TGCGATTTTGCAATTTGCTGGT	CTCCCCGAACTGTTTTCCAAGC	22	22	60.806	61.962	40.909	54.545	342
636	LInD2-176	Chr02	813246	731173		Nip./ZS97	CGTTGCATTGCCAGAATCCATG	CGGTAGCAATAGAACGGGGAGA	22	22	61.051	61.592	50	54.545	350
637	LInD2-177	Chr02	827379	745270	715991	both	TCAACCAGCCATGCATGTTTGA	ACCATGGATCCTTGCAAGGTCA	22	22	61.342	61.965	45.455	50	301
638	LInD2-178	Chr02	845667		740210	Nip./MH63	TGTGTTGACGGATACAGTCCCA	CCACGTAGGTTGCAGTTTCCAC	22	22	61.345	61.948	50	54.545	349
639	LInD2-179	Chr02	870082	787861		Nip./ZS97	ACGTAGCTAAAAACCTCACTCCAA	TCGTGGTCCATGACGAAGCATA	24	22	60.202	61.785	41.667	50	305
640	LInD2-180	Chr02	916544	840791		Nip./ZS97	TTGAGATACTACCGGTGGAAATCAC	GCACCACAGTGGGTAGATCCAA	25	22	60.395	62.266	44	54.545	330
641	LInD2-181	Chr02	1005940	934442	906231	both	CAGAAGTGGATCAATGGACGT	ACTGCGACACTATGACGGTT	21	20	62.018	61.968	52.174	50	323
642	LInD2-182	Chr02	1100895	1028787		Nip./ZS97	CCCATCAACTGAACTGTTGGGC	TTATTAGCACATTGGCCCACGC	22	22	61.976	61.84	54.545	50	334
643	LInD2-183	Chr02	1230575	1157868		Nip./ZS97	CATTTCTTGTACTCCCTCCGTTTCA	CAGTCGTCTCAATTGCGATTGGA	25	23	61.029	61.468	44	47.826	345
644	LInD2-184	Chr02	1326121	1252387	1235886	both	TTCGGGGAAAGGGAAGAAACGA	AGTACACGTGGCATTTTCGCTG	22	22	61.877	62.001	50	50	304
645	LInD2-185	Chr02	1330306	1256537	1240036	both	GTAATGGTGGTCGCGTTGATCG	TTTAACGAAACTTGCCGCACGT	22	22	62.164	62.128	54.545	45.455	300
646	LInD2-186	Chr02	1379764	1312279	1295786	both	CCCGTACTAGTGCCACCCATAG	CCTGGACATGCTGGAGGAGTAC	22	22	61.917	62.12	59.091	59.091	310
647	LInD2-187	Chr02	1417696	1350207	1333711	both	GCGTCCATCTCCACTACTCCAT	ACCAAGGTGAAACGCGTAGGTA	22	22	61.599	61.919	54.545	50	347
648	LInD2-188	Chr02	1446191	1391613	1375121	both	TTCAGGGAGCAGAACATGGTGT	TCCCGTTTCGATCATCCCATGA	22	22	61.888	61.544	50	50	318
649	LInD2-189	Chr02	1465616		1394595	Nip./MH63	CCACAACACACACACACACACA	ATAGATGCGGCATTCGGGACAA	22	22	61.956	62.447	50	50	335
650	LInD2-190	Chr02	1512692	1458124		Nip./ZS97	GGAGGTAGACGCAATGACCAGT	TGAGAGGGGAGAGGAGATCGAG	22	22	62.049	61.884	54.545	59.091	325
651	LInD2-191	Chr02	1521382		1454565	Nip./MH63	CCTTCTCCCGAACACAGCCTTA	ACTCTCGCGAACTTTCCACTGA	22	22	61.993	61.907	54.545	50	313
652	LInD2-192	Chr02	1693277		1626557	Nip./MH63	AGAACCAGAGTTTTCCTTCTGCA	GGGACCTTAGCTGATGTTCTCTGA	23	24	60.118	61.659	43.478	50	349
653	LInD2-193	Chr02	1731560		1664826	Nip./MH63	GCAACGCACGGACATCTTTTCT	GGCCTTAGGTTTGCCAACTTGG	22	22	62.255	62.241	50	54.545	345
654	LInD2-194	Chr02	2016550	1962306		Nip./ZS97	GGCGCCAACCAGCAAAATATCT	TCATCAGATTTTGCAGCCGGAG	22	22	62.103	61.26	50	50	331
655	LInD2-195	Chr02	2023609	1969436		Nip./ZS97	GATGTGTGAGGAGAGGGAGTGG	TGTTGTTGAGCTGCTGTTGAGC	22	22	61.797	62.145	59.091	50	309
656	LInD2-196	Chr02	2060096		1993406	Nip./MH63	TTTGGTTTGAGCAGAAGCCGTC	TGTACCACTTTGTACAGCGTGC	22	22	61.896	61.374	50	50	323
657	LInD2-197	Chr02	2096024	2040439	2030174	both	AGGTTGCCCTCCTGATCTTGAG	CTACACGTCAGCAGCATCACAC	22	22	61.752	61.798	54.545	54.545	333
658	LInD2-198	Chr02	2114998		2048489	Nip./MH63	TGGCCATCTATAGTCGAGGGAGT	GGTCGCTGAAGATGGCATGAAG	23	22	62.104	61.884	52.174	54.545	313
659	LInD2-199	Chr02	2121139		2054581	Nip./MH63	TCGGGGAGCTTCTTCTTTCTGA	GTTGGCCTTTCCTTGGGACTTT	22	22	61.086	61.284	50	50	345
660	LInD2-200	Chr02	2143567		2077912	Nip./MH63	ACGGCACAAGAGAATGCATTCTG	CCCCATCTGGATCAGCGGTAAA	23	22	61.969	62.137	47.826	54.545	316
661	LInD2-201	Chr02	2145974	2112504		Nip./ZS97	ACTCGCATGCTAACTTGAGATGA	TGGTCATTGCTGGCATGAGAGA	23	22	60.119	62.011	43.478	50	306
662	LInD2-202	Chr02	2193940	2160021		Nip./ZS97	GCTGTACTAATCTTTTGGCCGGT	ACGCCATATATTATGAAGGACGTCA	23	25	61.179	60.048	47.826	40	307
663	LInD2-203	Chr02	2328358		2197731	Nip./MH63	GCTGATGACTATGTGGAACGCG	ATCGCATTGTTGGAGCACCTTG	22	22	61.922	62.03	54.545	50	327
664	LInD2-204	Chr02	2367411		2234458	Nip./MH63	GCATCAATGTGCGAAGTTTCATCT	GGGAGTATGTTTTAGAGCATGCGT	24	24	60.674	61.216	41.667	45.833	334
665	LInD2-205	Chr02	2368672		2235772	Nip./MH63	AGCCTCCCAATAGGATTGGTCG	AAGGGGGACGGCATGTGATTTA	22	22	61.879	62.025	54.545	50	320
666	LInD2-206	Chr02	2561811	2535343		Nip./ZS97	ATCATACAGCCCTTGACGCCAA	AGAGGGTGTGAGAGTGCTTTGG	22	22	62.332	62.197	50	54.545	347
667	LInD2-207	Chr02	2631595	2605050	2540537	both	TGTGCGTCTAACATGTGAGCCT	AGGGGGAGGGGAGGAGATACTA	22	22	62.241	62.447	50	59.091	338
668	LInD2-208	Chr02	2677431		2586394	Nip./MH63	GGGCGCCATCTAATAAGTAGCG	CTCTCTGTCCGCGTACTTGTCA	22	22	61.244	62.013	54.545	54.545	338
669	LInD2-209	Chr02	2685393		2594328	Nip./MH63	ATAAAGGCCAGCTTCTGCCGTA	TGCTCTTCAACAGCAGACCTTCT	22	23	62.071	62.074	50	47.826	327
670	LInD2-210	Chr02	2772702	2724467		Nip./ZS97	CTCTTCTCCATCGCCGTCTTCA	CATCGAAGAGGAGGAGGTGGTC	22	22	62.093	61.85	54.545	59.091	321
671	LInD2-211	Chr02	2834557		2744684	Nip./MH63	CGCTTTTCGTTTCCTGCGTTGA	TAGCAGTCTCCCTCCGTTTCAC	22	22	62.733	61.724	50	54.545	329
672	LInD2-212	Chr02	3092846		2990411	Nip./MH63	TGTGTCACAGGTCTTGGTTGGT	TTGAAGGGCCAGTTCCAAATGC	22	22	62.014	61.93	50	50	328
673	LInD2-213	Chr02	3095867		2993513	Nip./MH63	GCACTAAGTCGCACTGTTTGACA	AGTACGTCCGAGTAGGCGAGTA	23	22	61.829	62.104	47.826	54.545	315
674	LInD2-214	Chr02	3172347	3100073		Nip./ZS97	AAGTGGGGGAGAGAACGACATG	TTGAAGGCGGTTTTGGATGACG	22	22	61.998	61.957	54.545	50	308
675	LInD2-215	Chr02	3459023	3393523	3337939	both	TTCGGCATTTTTGTCGGGAAGG	TCCCAGGATTAGCATCGGATGT	22	22	61.967	61.027	50	50	340
676	LInD2-216	Chr02	3571444		3451107	Nip./MH63	AATTTCAACAATGGTGCCCGGG	GCTTTCCCTTTTTCCAACTCGCT	22	23	62.252	62.108	50	47.826	345
677	LInD2-217	Chr02	3833346	3760046	3704514	both	AGCTTTGTCGTTGTGTTACATCCT	TGGGAGCTAGGAGTAACTTGGAG	24	23	60.982	60.882	41.667	52.174	350
678	LInD2-218	Chr02	3928021	3834427	3778902	both	AAAATTGGAGCCACAGCCATGG	ACCGGTGATGATCCATCGTACC	22	22	62	61.917	50	54.545	317
679	LInD2-219	Chr02	3945751		3796700	Nip./MH63	GGAGCATCAAGGCACGGTAAAG	TGCACATATCTCATGCATGCACC	22	23	61.826	61.857	54.545	47.826	304
680	LInD2-220	Chr02	3958700	3868740	3813219	both	GAAGTCCAGAAATCACCTCTCACA	AGAAGCGTCGGTTGATAAACCA	24	22	60.263	60.289	45.833	45.455	350
681	LInD2-221	Chr02	3960103	3870100	3814579	both	TAACGAGAGGTACCGGTCATGC	ACACTTCCAGGACGTAGCACTT	22	22	61.838	61.604	54.545	50	327
682	LInD2-222	Chr02	4007810	3918296	3862781	both	ACTGCGCACCACTAGCTACTTC	TCCGAAAGCACATTGGTACGTT	22	22	62.601	60.807	54.545	45.455	328
683	LInD2-223	Chr02	4037278	3939330	3883813	both	GGAAGTCATGCGCTTTATGGGT	CCTGGCTTTACCACTTGCATCG	22	22	61.265	62.081	50	54.545	307
684	LInD2-224	Chr02	4085841	3988018	3932459	both	CCATTTCTCAGCGCCATTGTGT	TATCCATGGCTCATCACCACGC	22	22	62.03	62.758	50	54.545	321
685	LInD2-225	Chr02	4183574	4010269		Nip./ZS97	TCGGATGGACACTTAGGGAGTT	CGCTTGATGAACTATGGAGCCG	22	22	60.559	61.682	50	54.545	304
686	LInD2-226	Chr02	4264334	4093493	4113149	both	GAGAGTAGAAGGCACAAGGGCA	ACTCCAGGTTCGAGCTAACACC	22	22	61.998	61.984	54.545	54.545	324
687	LInD2-227	Chr02	4273760	4102885	4122560	both	GTCCAAACTTACACTCCTGCGC	TGTTGTGGTAGTCTCGTAGCCG	22	22	62.003	62.019	54.545	54.545	339
688	LInD2-228	Chr02	4291701	4120497	4140172	both	GGGAATTTGACTTGACGACCTCC	CGGAGTTACGACAGAGAATCGC	23	22	61.421	61.1	52.174	54.545	333
689	LInD2-229	Chr02	4355445	4184605	4216293	both	CACATATGTTTCCCGGCGATCG	GACACACTTCCACCAGTTCGTG	22	22	61.991	61.624	54.545	54.545	324
690	LInD2-230	Chr02	4395167	4227929	4264793	both	CTCATGAGTTCCCAATTCCCGC	GGGGTCACATCCCTTTCTAGGT	22	22	61.581	61.165	54.545	54.545	345
691	LInD2-231	Chr02	4601697	4464703	4472578	both	TGCTCAAATCCCCTGAAATTTGGT	GGCATGTCCAGTTGAGTTAGCAC	24	23	61.246	61.966	41.667	52.174	301
692	LInD2-232	Chr02	4605081		4475969	Nip./MH63	TTGTGCTGTCTTCTCAACAGGC	TTGCAGTGACCAGTGGGAATCA	22	22	61.323	62.147	50	50	321
693	LInD2-233	Chr02	4612306	4475329	4488607	both	TACCAGGTGTAAAGCTCGAG	AAACACACCCTGAGTCGACGA	20	21	62.045	62.47	54.545	54.545	305
694	LInD2-234	Chr02	4612959	4475945	4489211	both	ACTCTCTGATCTCCTCTGCACG	CCGCATCATTAAGCCATTCCCC	22	22	61.264	61.976	54.545	54.545	300
695	LInD2-235	Chr02	4630181	4492775		Nip./ZS97	GAGGGGATCATACCGGAACTCC	AACATGCATGCCCATTTCCGTC	22	22	61.671	62.36	59.091	50	346
696	LInD2-236	Chr02	4632963		4509694	Nip./MH63	CAAACCTGCACAACACTTTCTGT	GCATGTCAAAGTGGGCAGACTC	23	22	60.367	62.02	43.478	54.545	350
697	LInD2-237	Chr02	4723343	4586295	4594813	both	TGTCATGTCACCAGAGTGTGCT	TGAACTACCGAAGCTGATGGCA	22	22	61.868	61.992	50	50	341
698	LInD2-238	Chr02	4733266	4597284	4605800	both	ACTTGCTGCCAGAGAGATTGGA	CTATTTGGTAGCACGCGCGTTC	22	22	61.685	62.706	50	54.545	347
699	LInD2-239	Chr02	4734114	4598162	4606679	both	CGACAAAACCGACATGCCAAGA	GTCCTCCCTCCCAAACATCCTC	22	22	61.947	62.076	50	59.091	340
700	LInD2-240	Chr02	4786298	4683336	4691900	both	GCAACTTGAAAGCCGTCATCCT	CGCTTCCAGCACCAAAGAGATC	22	22	61.709	61.82	50	54.545	347
701	LInD2-241	Chr02	4791066	4688133		Nip./ZS97	CAACTCAAACAGTGCTCTCCGT	ATGGTTGGACAGGTGTCTAGCT	22	22	61.06	61.094	50	50	303
702	LInD2-242	Chr02	4805997	4708773	4717336	both	ATTGTCCCGGTGAACCAAAGGA	CAAGTTGTGCTGCCTGGTAGTG	22	22	62.156	61.955	50	54.545	334
703	LInD2-243	Chr02	4835794	4738294	4746864	both	TGAGTCGGTTTCTAAGATCGTTCAC	CCGTACCATGCCGTAACCAATG	25	22	60.845	61.883	44	54.545	342
704	LInD2-244	Chr02	4895759		4807721	Nip./MH63	CAACACCCGGAGCCACGAAA	GCGACATTGCTGCCCAAATCTT	20	22	63.279	62.604	60	50	338
705	LInD2-245	Chr02	4938845	4847266	4836149	both	AGCACGCAACAAGAACTGCTTT	CGGTGTAGCCAGCTTGCAAATG	22	22	62.092	62.887	45.455	54.545	348
706	LInD2-246	Chr02	4962401		4859802	Nip./MH63	CGGGCCTGTTCACTTTGATGTC	GGGGGCTTTTATTCCCTCCGAT	22	22	62.016	62.161	54.545	54.545	325
707	LInD2-247	Chr02	4987227		4905817	Nip./MH63	TTCGATTATTCGCGTCAACGGC	GGTCACAACCAGAACCCAAAGC	22	22	62.159	62.164	50	54.545	335
708	LInD2-248	Chr02	5100931	5005490	5015257	both	CTCCCGACGAAAACCACCATTG	TTCAAACCCGCCCTCAAGATGA	22	22	62.012	62.21	54.545	50	322
709	LInD2-249	Chr02	5128994		5045486	Nip./MH63	GCATATAGACCTCCCCACCAGG	ACTTTCTAGCATTGCCCACATTCA	22	24	61.682	61.053	59.091	41.667	338
710	LInD2-250	Chr02	5162838	5069478	5079309	both	CGACGGTCACAGCCTCATCTTT	CGGATTGCTGCAGTTTCTGTCA	22	22	62.855	61.699	54.545	50	348
711	LInD2-251	Chr02	5201636	5099920	5109751	both	TGCACAACATACCTAGAGCCGT	TCCCGTGTGACTGTGCTATGTT	22	22	61.732	61.927	50	50	345
712	LInD2-252	Chr02	5338701	5234632	5244493	both	GGACGGAGGTTTGTTGGGAAAC	TCCCTGTCAAAATCGCAGCAAC	22	22	61.903	61.961	54.545	50	304
713	LInD2-253	Chr02	5401565	5296751	5306744	both	CCCGTTTTTGTTGCACCTCCAT	AGCAGGGAACAAATGCACTTGG	22	22	62.175	61.924	50	50	347
714	LInD2-254	Chr02	5414535	5309643	5319640	both	TCTCGGTGCTTGTTTGAGACCA	GGTGCAAATCAGGGTTCGACTT	22	22	62.121	61.393	50	50	334
715	LInD2-255	Chr02	5504612	5435712	5445730	both	CGAACTCATCTCCCCCTTCCAG	TCCACGGTGTCACCTAGTTTGA	22	22	62.12	61.279	59.091	50	330
716	LInD2-256	Chr02	5533692	5477848	5487867	both	AGGGCACTGAATCTCCGATCTT	CCACCCATGGTACGGAAGATACT	22	23	61.223	61.512	50	52.174	320
717	LInD2-257	Chr02	5544185	5487752	5497771	both	AGAAGAAGCAGATTGGCCAGGT	CGAGCTAAAAGCAAAGGCCGAA	22	22	61.96	62.012	50	50	348
718	LInD2-258	Chr02	5578873	5522397	5532490	both	CCGTGCGTTTGTATTTCAGCCA	TGTTACATAGGGTGTTCGGGCA	22	22	62.261	61.679	50	50	340
719	LInD2-259	Chr02	5625053	5570419	5580518	both	ACCTTATATGGACATGCTCAACCTT	TCCAGCCTTTCGTGATTCAGGA	25	22	60.104	61.678	40	50	350
720	LInD2-260	Chr02	5677468	5635861	5645961	both	GACCGAGGCTAGCTTAGGTCAC	CGTCAGGTCATGCCGATATCGA	22	22	62.155	62.267	59.091	54.545	338
721	LInD2-261	Chr02	5735924	5694629	5704734	both	AGTTTCCGCGAAAACCAAGTGG	GCGTCGGGCAAAGAAAGAAAGA	22	22	62.148	61.948	50	50	304
722	LInD2-262	Chr02	5750434	5709338	5719446	both	GGCAGAAAGGCAACAGAGAACC	CACTTCCGTCTTCGTCCAAAGC	22	22	61.966	61.992	54.545	54.545	328
723	LInD2-263	Chr02	5804779	5770028	5780131	both	TATGTGGGTGAGGAAAGCGTGT	TGCTCTGCAGTCTGTCTTTGGA	22	22	61.937	61.868	50	50	321
724	LInD2-264	Chr02	5808001	5773276	5783379	both	AGTTTCCGACCGATTCCGAGTT	GCACTAAGCACCTTGAAAGAGGC	22	23	61.98	62.212	50	52.174	341
725	LInD2-265	Chr02	5810839	5776129	5786231	both	GCAGGATCAAATGGGCCACAAG	ACTGCAAGAACTCAAACAACCACT	22	24	62.365	61.349	54.545	41.667	333
726	LInD2-266	Chr02	5844247		5819531	Nip./MH63	CAATGCTTAGAGCTGGGCGAAA	ACAGGAGCAGGTGATTCTCTTCC	22	23	61.516	61.951	50	52.174	338
727	LInD2-267	Chr02	5870593	5835597	5845635	both	GGGATGGTGCATGCATTGAGTT	GTGTGTACAATGACGGCCAAGT	22	22	61.795	61.383	50	50	350
728	LInD2-268	Chr02	5901641	5865971	5876007	both	TCCTTACATGCCATCGCTGCTA	TGCCACCGACAAAACTCAGTTC	22	22	61.864	61.575	50	50	344
729	LInD2-269	Chr02	5911561	5876004	5886090	both	GCACACTTGTATAGCTGCACCT	GCTGCAGTGTTCCCATCTCTGA	22	22	60.937	62.572	50	54.545	334
730	LInD2-270	Chr02	6003692	5969013	5958207	both	ACCGCTATAGGAAGCACGACTG	GGTCTCTAGGGGTAGCACAACG	22	22	62.154	62.1	54.545	59.091	311
731	LInD2-271	Chr02	6003747	5969018	5958212	both	ACCGCTATAGGAAGCACGACTG	GGTCTCTAGGGGTAGCACAACG	22	22	62.154	62.1	54.545	59.091	311
732	LInD2-272	Chr02	6090185	6064148		Nip./ZS97	CAAGCGTGCAAATTTATCTCAAGCA	TGTATCGTTCATCTTTGCTTTCAGC	25	25	61.351	60.391	40	40	305
733	LInD2-273	Chr02	6169577	6133448	6151451	both	GCCAGCAGCGAGAGAGATAGAT	AGAGTAACCACCAACCGGTCAT	22	22	61.717	61.355	54.545	50	331
734	LInD2-274	Chr02	6214323	6179528	6205618	both	GGCTTGCTTTCGCTCATGACAT	ACACGTCTACCATCTGCACACA	22	22	62.085	61.916	50	50	306
735	LInD2-275	Chr02	6262319	6282383		Nip./ZS97	ACCTGGGTTGAAAGCACTATGACT	GCAATTGAAAGCAATGGAACGAGT	24	24	62.039	61.088	45.833	41.667	328
736	LInD2-276	Chr02	6267861		6282081	Nip./MH63	AGCAGCCATGATTGACGTAGGT	AGCTACGGATGTACACTCAGGT	22	22	62.064	60.621	50	50	340
737	LInD2-277	Chr02	6270668		6284839	Nip./MH63	AGTTGTACTCCATCTGTCCCAGA	CGCAATAGATCGATTTGGGTGCA	23	23	60.502	61.841	47.826	47.826	339
738	LInD2-278	Chr02	6282162	6300892	6296626	both	TGTGTTGTGTTGAGTGTGCGTG	GGCTACCCAAACCATGCATCAC	22	22	62.313	62.103	50	54.545	316
739	LInD2-279	Chr02	6298126	6317093	6312844	both	CCCACACTGAACTCCAATGCAC	TGTCAATGGCTTCGATGGCAAC	22	22	61.965	62.026	54.545	50	313
740	LInD2-280	Chr02	6436643	6394835	6389114	both	GATGGAGCCTCTTCCCAGTCTG	AGCTATCTAGGCAGTCCTGGGA	22	22	62.124	61.846	59.091	54.545	328
741	LInD2-281	Chr02	6480271		6437801	Nip./MH63	TCAGGTATGTGAGGTTGCCGAG	GCACACCGTTCTTACGTGACAG	22	22	62.048	61.978	54.545	54.545	343
742	LInD2-282	Chr02	6653783		6681372	Nip./MH63	GAACGGAGGGAGCGCAAATT	ATCTACAACCACACTGCCCACA	20	22	62.279	61.884	50	50	350
743	LInD2-283	Chr02	6739295	6691262	6766149	both	TATCCAAATCCGCTTGCATCCC	TCATTTCACGTACGCCAAAA	22	20	61.075	61.051	50	43.478	300
744	LInD2-284	Chr02	6819396	6775613	6850595	both	GCGCTCGTTTCATCACGGTAAA	AATTTCTGGACTTCTTCGCGCC	22	22	62.047	61.762	50	50	325
745	LInD2-285	Chr02	6828270	6784346	6859327	both	GCTAGTGCTATGGGAGAAACTTCA	GTTGCAACGCACGGTCATTTTC	24	22	60.383	61.967	45.833	50	339
746	LInD2-286	Chr02	6874012		6893392	Nip./MH63	GCCGATTCTATGGCCTCTTTGG	GCTGGCTAGCTGATGATAAACTAGG	22	25	61.389	61.082	54.545	48	349
747	LInD2-287	Chr02	6989486	6922616		Nip./ZS97	GCAAAGGCTTGTCTATGCTGCT	TCCAACAGATACCCATGGCATGT	22	23	61.777	61.976	50	47.826	307
748	LInD2-288	Chr02	7187703	7134823	7245326	both	CATTGCTTCCATGTTCCCGACC	ACTTTACCATTGCAGGTGCTCT	22	22	62.092	60.225	54.545	45.455	348
749	LInD2-289	Chr02	7296425	7290144	7400247	both	TCCGTGCAGCGATGTACATTCT	TCACATCAACTATTGACGGCAGA	22	23	62.356	60.056	50	43.478	350
750	LInD2-290	Chr02	7307720	7300028		Nip./ZS97	TCAAGACAACGGTACAGGTCCC	GATGAGAATGGCTGTCGACCGA	22	22	61.924	62.409	54.545	54.545	337
751	LInD2-291	Chr02	7309296	7301648	7411652	both	TGTTCCACGCCTATTGATACGAA	AAGAAGAATGGGGAGGGAGGGA	23	22	60.119	62.284	43.478	54.545	323
752	LInD2-292	Chr02	7384911	7386784	7417700	both	CTCCACTAGAGCCATCTCGAGC	GCACTGGCAGTCCTTAAACTTGT	22	23	61.961	61.553	59.091	47.826	310
753	LInD2-293	Chr02	7401269	7404071	7434978	both	TGTATCAGTGGACATGCTCGCA	CAACTCGATATGGGCATGGCAC	22	22	62.047	61.955	50	54.545	340
754	LInD2-294	Chr02	7418210	7421679	7452597	both	GATGTCCATCAGTCTCCTCCCG	AGACTGGTTCCCCTCTCTCCTT	22	22	61.915	61.925	59.091	54.545	329
755	LInD2-295	Chr02	7421426	7425000	7455911	both	AGCTAACTGGGGTGCCAAAATG	AGCCATCTGGATAAAACCTCCTCA	22	24	61.41	61.377	50	45.833	302
756	LInD2-296	Chr02	7447496	7450980	7481889	both	TGGTGCCGGATAACGTATTACACA	AGGCTTGCGGTAAGAATATAGGAGA	24	25	62.181	61.22	45.833	44	350
757	LInD2-297	Chr02	7483263	7485262	7516186	both	GCTAGATCCCCACTCCAATGGT	TGGCAATGACTTAGGGACCGTT	22	22	61.56	61.947	54.545	50	304
758	LInD2-298	Chr02	7523838	7525493	7556427	both	CGCGTACGTCCACACATAATAAGC	ACAACCTTATACCCTCCGTCCC	24	22	62.329	61.222	50	54.545	347
759	LInD2-299	Chr02	7679061	7692270	7714166	both	TTGCTAGGAGGTAAGAGCAGGC	GATCGACGGGCACTGAAAGGAT	22	22	61.803	62.68	54.545	54.545	300
760	LInD2-300	Chr02	7706992	7720290	7742178	both	GCGTCGTACGTCTCTCTCTCTC	GCAGGTATAGCTCAGATCCGCA	22	22	61.911	61.977	59.091	54.545	305
761	LInD2-301	Chr02	7710222	7723484	7745372	both	ACCACTAGCTTCACTCGTTCTCC	CCTGTTCAGGTGTCATCCCACT	23	22	61.925	61.945	52.174	54.545	300
762	LInD2-302	Chr02	7771118	7780865	7802759	both	CGGAAGCCCAACTAGACACACA	GCGACCCTGTAGTAGTGGTACG	22	22	62.495	62.135	54.545	59.091	318
763	LInD2-303	Chr02	7774931	7784924	7806818	both	CTCGTCCACCTCTGTACTCTGC	GCAAGGTATCTGTCCATTTCTGCC	22	24	62.083	61.989	59.091	50	337
764	LInD2-304	Chr02	7776771	7786731	7808625	both	GTGTGTATGACAGGTGGGACCA	ACCGAATCATTTGTGAACGCCA	22	22	61.937	61.39	54.545	45.455	330
765	LInD2-305	Chr02	7881004	7899806	7909299	both	TACTCTTCGCCAGCACATTGGA	TGTCGCACTGTACTGCTAGCTT	22	22	61.992	61.972	50	50	336
766	LInD2-306	Chr02	8186046	8372602	8103998	both	TCCTGCTAACAAGAAGATCGAACA	TTTGTTTGTTTTGGGACGGGGG	24	22	60.021	62.06	41.667	50	347
767	LInD2-307	Chr02	8293970	8494361		Nip./ZS97	AGTGTAGTAGTGTTGTCCCGGC	GGCCAAGCCTTACACATGCTTT	22	22	61.98	61.986	54.545	50	322
768	LInD2-308	Chr02	8319895		8239635	Nip./MH63	CCACCGTTTCAACCCTCTCGAT	CAATTCGCACGGCAAAAGCAAG	22	22	62.562	62.281	54.545	50	333
769	LInD2-309	Chr02	8322939	8523301	8242675	both	GCTTAACCGCAACAACTACCCC	TCCTTTTTCGGACCAAGGGAGT	22	22	62.019	61.561	54.545	50	301
770	LInD2-310	Chr02	8343483	8533272		Nip./ZS97	ACCATGTTGGGCCCAATGAAAC	TGTTATGGTGGAGCTAATAGTTGGC	22	25	61.94	60.919	50	44	341
771	LInD2-311	Chr02	8413987	8600558	8343206	both	CGCCAAGTCTAACCAGAGGTCA	TAGGACGAGCATGCACACGAAT	22	22	61.983	62.356	54.545	50	343
772	LInD2-312	Chr02	8425949	8613313		Nip./ZS97	ACCTAAGGTTGGGCCAAGACTC	ACGGAGGGAGTAACAAGCAACA	22	22	61.953	61.871	54.545	50	326
773	LInD2-313	Chr02	8429288	8616630		Nip./ZS97	GGAAGGAGTTCAGATAGCGGCA	TCCAAATCGCGACGAACACTTG	22	22	62.115	61.987	54.545	50	336
774	LInD2-314	Chr02	8536007		8458035	Nip./MH63	CACGTGGGTTTCATCTGCTGAC	CGTCGGTGCACCTTTTACTCAG	22	22	62.006	61.74	54.545	54.545	307
775	LInD2-315	Chr02	8582781		8493809	Nip./MH63	ACCTTTCACTCCCATCTTGGCT	TAGAGCAATTCCTCGTCCGTCG	22	22	61.635	62.138	50	54.545	341
776	LInD2-316	Chr02	8601145		8512417	Nip./MH63	AAAACCGAATCCTAGCATGAGGC	CCAGGTAGCCTTTCTCTGCTCC	23	22	61.244	62.38	47.826	59.091	300
777	LInD2-317	Chr02	8731504		8561639	Nip./MH63	GGCAAACCAACCCACAATATCCA	GACACCTTTTCGCTTCGTCCTG	23	22	61.636	61.992	47.826	54.545	328
778	LInD2-318	Chr02	8733885		8564542	Nip./MH63	ATCAACCGGGTTTGTGGTCTGT	GGGTTAGACCGGACCTTCATACT	22	23	62.408	61.196	50	52.174	314
779	LInD2-319	Chr02	8816797		8645290	Nip./MH63	AACTTTGCAACCGCTGAACTCC	AGGAGGTAGCAACGCACTGAAT	22	22	62.153	61.998	50	50	350
780	LInD2-320	Chr02	8893832		8748231	Nip./MH63	TGGATACCTTTACCCCATGCCG	TTGATGCGATCTGAGCCATCCA	22	22	62.144	62.129	54.545	50	338
781	LInD2-321	Chr02	8899569	9026670	8753918	both	GTGTACCGCGGAGTAATGGTGT	TGCATGCAATGGTGATGAGAGC	22	22	62.604	61.841	54.545	50	328
782	LInD2-322	Chr02	8911768	9038634	8765940	both	ACCCATTACAGTTGCCCCTTCA	CAGTCCCACCTCATCCCAAACA	22	22	61.904	62.215	50	54.545	350
783	LInD2-323	Chr02	8937828	9064654	8791896	both	ACCCAAATGGAGCTAGAACCCA	AAGTGGCCCGATCCTCTTATTTT	22	23	61.372	60.054	50	43.478	334
784	LInD2-324	Chr02	8956496		8810261	Nip./MH63	ATAGGTTGCTAGCCGGTACACG	ATGTGCTGTGGCGTACTGTACT	22	22	62.161	61.983	54.545	50	307
785	LInD2-325	Chr02	8981539	9108366		Nip./ZS97	TGGGATCGGTAAAAGATGAGCCA	GGAAGTCTTGAAAAATGCTGGCC	23	23	61.709	60.862	47.826	47.826	347
786	LInD2-326	Chr02	8995489	9122436		Nip./ZS97	AAAGAGGCTTAGGCTGACTGCA	GATAACCCACATCCTCCTCCCG	22	22	61.945	61.932	50	59.091	309
787	LInD2-327	Chr02	9048714	9173543		Nip./ZS97	TGCACAGCTTGTTGGGTAGG	CGGAGGATGAAGAGGGACACAG	20	22	62.215	62.108	50	59.091	302
788	LInD2-328	Chr02	9105309	9212342	8956157	both	GTGAGAACTTGTTGCGACCTGC	AGGTTGTGGGAACAAATCCTTACA	22	24	62.495	60.387	54.545	41.667	316
789	LInD2-329	Chr02	9258554		9011495	Nip./MH63	TCGTGGTCAAGTGCTCATCCAT	TTGTTGAGCTGGTAGGAGGTCG	22	22	61.997	61.983	50	54.545	308
790	LInD2-330	Chr02	9415863		9042238	Nip./MH63	CCTGGATGCCCTGATCTTACGT	ACCCCTTTTCCCCCTTTTGTCA	22	22	61.869	62.059	54.545	50	339
791	LInD2-331	Chr02	9431380		9067269	Nip./MH63	AGCGAAATCCAATTGACGATAACCC	ACTAAGTGATACCCCGTGCTTCA	25	23	61.937	61.385	44	47.826	348
792	LInD2-332	Chr02	9771463		9332833	Nip./MH63	ATGTTGCCTACATGCACAAGCC	GGACCTCCGTTAGAGTTTGGGT	22	22	62.041	61.676	50	54.545	324
793	LInD2-333	Chr02	9990248		9534103	Nip./MH63	GTACAAGCTGCCTCCCATGAGA	TAGTCCCCCAAGGTGAGGTTCT	22	22	62.064	62.198	54.545	54.545	301
794	LInD2-334	Chr02	10283612		9607948	Nip./MH63	CCTGCACAGAGAGACGACGTAA	CGCATCTCCATCATCTCCCCAT	22	22	62.013	62.005	54.545	54.545	322
795	LInD2-335	Chr02	10289255	10138016		Nip./ZS97	GCACGCACAACTTTACCATTGC	CGTACGCCACGTAGACCAAAAC	22	22	61.73	62.034	50	54.545	325
796	LInD2-336	Chr02	10289307		9614034	Nip./MH63	GCACGCACAACTTTACCATTGC	CAAAACTACCGCGGATTGGGTC	22	22	61.73	62.073	50	54.545	344
797	LInD2-337	Chr02	10310687	10160392		Nip./ZS97	CGTACGCCACGTAGACCAAAAC	ATCCAATCCTCCTGCAGAAGATG	22	23	62.034	60.181	54.545	47.826	337
798	LInD2-338	Chr02	10313482		9636615	Nip./MH63	TGTGAGTCTTGAAGAGAAAATGGCA	CATCTCCAAAACCACTTCGCCA	25	22	60.92	61.392	40	50	337
799	LInD2-339	Chr02	10327683		9650814	Nip./MH63	TGCCAGCATATGCAGAGTGAGT	CCCTTCCACTTCCAATATACTCCCT	22	25	62.067	61.411	50	48	350
800	LInD2-340	Chr02	10351420		9672991	Nip./MH63	TGGGACAAGTACAGGCAAGCTT	TACAGAGTCGAGGAAGGAGGGG	22	22	62.148	62.347	50	59.091	340
801	LInD2-341	Chr02	10392115		9738231	Nip./MH63	CCCAAAGAGCCGAAAAAGAAAACC	ACCCCAGGTTTGAAGACATTTCT	24	23	61.268	60.117	45.833	43.478	327
802	LInD2-342	Chr02	10397226		9743401	Nip./MH63	CTTCCCGCTCCTTGCCAATTTT	GACGGTCATTGGAAGCTTACGC	22	22	61.986	62.116	50	54.545	320
803	LInD2-343	Chr02	10442733		9795926	Nip./MH63	CGCTTGGTCTCCCTCTCTTCAT	TGCTCCATTGTCTGCTCATCGA	22	22	61.797	62.052	54.545	50	343
804	LInD2-344	Chr02	10551274		9854211	Nip./MH63	ACAGTGAAGAAGTGAGTGTGCA	TGTTGTTGGTTGCAGCAAAGGT	22	22	60.093	61.991	45.455	45.455	319
805	LInD2-345	Chr02	10560087		9870560	Nip./MH63	CTGGGCTGGGAGAGGGAGTATA	TCCACTGGAGTTTTGGTACGTCA	22	23	62.178	61.757	59.091	47.826	316
806	LInD2-346	Chr02	10792970	10642056		Nip./ZS97	GCAGCCTGCATGAGAAAGGTTC	GCAATCACGGATGGAGGGAGTA	22	22	62.341	61.865	54.545	54.545	343
807	LInD2-347	Chr02	10921693		10193083	Nip./MH63	ACACACAACAAGGGAAACACGA	ACCCATACTCCATGTAGCACCA	22	22	60.876	60.897	45.455	50	336
808	LInD2-348	Chr02	11107480	10953900	10376297	both	GGGAGAAGCTGTGCAACTGTCT	AGCCTCAGACGCTTATACGGAG	22	22	62.766	61.645	54.545	54.545	349
809	LInD2-349	Chr02	11159362	11006231	10428629	both	ATTCTTCAGGCTCCCAGTGACC	TTCCTGCATGCACTTTGGACTG	22	22	62.013	61.654	54.545	50	303
810	LInD2-350	Chr02	11161604	11008439	10430836	both	AATTTGTACTGGGACCGGCCTT	TGCTTACCTCAGTGCAAAGAGC	22	22	62.224	61.13	50	50	330
811	LInD2-351	Chr02	11235022	11099580	10521996	both	CCAGCTGCCAGCCGATATCATA	TGCGTGTAAATTGCGAGACGAA	22	22	62.312	61.428	54.545	45.455	337
812	LInD2-352	Chr02	11272536	11149408	10571824	both	ATCTGTGCGCTTACTGACCACT	CGATGGTGTGGATGGAGTGTGT	22	22	61.987	62.566	50	54.545	341
813	LInD2-353	Chr02	11338843	11206152	10628565	both	GTGGATCCGATAGCACCGAAGA	GGATTCGTGTAGCACCCCCTTA	22	22	61.907	61.805	54.545	54.545	312
814	LInD2-354	Chr02	11341278	11208543		Nip./ZS97	TGCATGATCGACCAGGCCTAAA	GGACTGCCCACTTGCATCTCTA	22	22	62.069	62.064	50	54.545	328
815	LInD2-355	Chr02	11364404	11231658	10654100	both	TCAGGATAGGTAGGCCCATCCC	TAATGGCAGCATTTGACGGGAC	22	22	62.523	61.52	59.091	50	341
816	LInD2-356	Chr02	11422757	11354773	10777256	both	ATTCAAGTGGGTGTACCGAGGG	CAGTCCTACCGACACCATTGGA	22	22	62.004	61.732	54.545	54.545	313
817	LInD2-357	Chr02	11590369	11525183	10947627	both	ACCCCCTCCCCACTAAACTTTG	TCGGCATTATACTGGTCTTTGGGT	22	24	61.905	61.911	54.545	45.833	341
818	LInD2-358	Chr02	11642611		11012213	Nip./MH63	CTAGTGAACAAGCCGGTGCA	TGCTGAGAGATAGACGATGCCA	20	22	62.255	61.012	54.545	50	348
819	LInD2-359	Chr02	11651499	11598631	11021149	both	GGCTCCCGAGTCCTCCAAATTA	AGCTCAACTGGTTAGGTTCCTTG	22	23	61.808	61.978	54.545	45.833	302
820	LInD2-360	Chr02	11891386	11825110	11247607	both	AAAGCAGAGAGGGAAAGCCA	ATAGGTGGGCATCGTCCTCATG	20	22	62.539	61.935	54.545	54.545	346
821	LInD2-361	Chr02	12132941	12064156	11462169	both	ACGATGGTGATTTGCCTCCTCC	GCACCCGCATGCTAAATTGCTA	22	22	62.648	62.152	54.545	50	301
822	LInD2-362	Chr02	12187582	12110276	11508290	both	GCCCAAACCTGTCAATGGTGAG	GGCTCAACATTTTCGAGGGCTC	22	22	61.976	62.082	54.545	54.545	326
823	LInD2-363	Chr02	12233613	12155905	11557678	both	TGGCCCGAGTACAGATTTCCTC	CGTCGAGGTCTAAGCAGGCATA	22	22	61.799	61.897	54.545	54.545	306
824	LInD2-364	Chr02	12262855	12202193	11603872	both	ATCTCCAGATTCCCACGTTCGG	GAGCCAACTCCACGCATTGAAA	22	22	62.115	61.961	54.545	50	341
825	LInD2-365	Chr02	12461366	12390489	11799966	both	CTCAGTGCGCATTTTGGTCCAT	GCGGTGCATCGTATTGGCATAA	22	22	62.03	61.947	50	50	300
826	LInD2-366	Chr02	12508955	12438075	11847485	both	AATGGCCCACATGAGCTCAAAG	CCCCTTGCACAGATCCAACAAC	22	22	61.471	61.976	50	54.545	350
827	LInD2-367	Chr02	12606090	12553285	11962691	both	GGCAACACCCTTAGGCTGACTA	CCTGCCAGACAGCAAACATCTG	22	22	62.004	62.024	54.545	54.545	304
828	LInD2-368	Chr02	12613698	12560924	11970330	both	TCCACCAAAATTTTCAGTGCGGA	TTATGTCAGCGGAAAGGCTCCC	23	22	61.5	62.642	43.478	54.545	342
829	LInD2-369	Chr02	12625403	12578324	11987734	both	GAAGTTGTTCACGGAGCTGCTC	CAACTCCGATTCCCACCCAGAT	22	22	61.996	62.075	54.545	54.545	307
830	LInD2-370	Chr02	12812615	12913163	12322643	both	TCACCAGCGGAATAGGCATCTC	TGAGAACCAGTCCTCAGAGCTG	22	22	62.181	61.406	54.545	54.545	302
831	LInD2-371	Chr02	12850003	12922082	12331563	both	CCCCCAAGGCCTAATTGACTCT	AAACCAATCCAATATCTACGGCTCT	22	25	61.768	60.163	54.545	40	332
832	LInD2-372	Chr02	12862208		12343742	Nip./MH63	AAGTCTGCATGCATGTGGGTTG	AGTGACCAAGCCTGAACTAGTGT	22	23	61.979	61.516	50	47.826	320
833	LInD2-373	Chr02	12987466	13113034	12522933	both	AACCCATGCATGATCCCTAGCA	AGTGCAGCTGTATACCCTCCAA	22	22	61.834	61.159	50	50	300
834	LInD2-374	Chr02	13002350	13128403	12538272	both	TTTTACGTGCGGTTTTTGCCCA	TGTGGGTGAACCTGGTGAACAT	22	22	62.352	62.092	45.455	50	347
835	LInD2-375	Chr02	13019800	13145868	12555736	both	CTTACCACCACCATTGCCATCG	GTGCAGACAACTCCAGCCAATC	22	22	61.835	62.02	54.545	54.545	303
836	LInD2-376	Chr02	13031593	13157798	12567671	both	GACGATGCACGAGGAAGGAGTA	GTTTACGACGAACCACGAACGG	22	22	61.833	62.266	54.545	54.545	350
837	LInD2-377	Chr02	13046448	13172422		Nip./ZS97	GAAGGGAGTAAGGGTGTCAGCA	TTTCCAGCATTTCAAAGGGGGC	22	22	61.679	61.94	54.545	50	316
838	LInD2-378	Chr02	13050297	13176355	12586233	both	TCACTCTATCTTGACAGCGGAACA	TCTGGGCGTGACAAGTTGGTAT	24	22	61.586	61.937	45.833	50	301
839	LInD2-379	Chr02	13159244	13279523	12689395	both	TAGCCCCTTGAAAGAGAGCGTC	GCTTGCATGCAGCTCAAGGAAA	22	22	62.049	62.543	54.545	50	314
840	LInD2-380	Chr02	13166994	13286864	12696736	both	ACATTTCTCTCGCTCTCCCCTG	GAATCCACAACACTTTGCCCCC	22	22	61.797	62.241	54.545	54.545	347
841	LInD2-381	Chr02	13191472	13308123	12718052	both	GCAGATTCGGCGACTGTTTGAA	GCAACAACAGCGATCCACATCA	22	22	62.001	62.015	50	50	329
842	LInD2-382	Chr02	13239931	13384565	12782654	both	GTAGTCACTACGCCAAAACCGC	TCACTGATGAGCTGGAACTGGG	22	22	62.048	62.001	54.545	54.545	321
843	LInD2-383	Chr02	13308642	13484703	12882789	both	TCCTTAGATGGTGCGAGCGTAG	AAAAGGGAACTAACCAGCACGC	22	22	61.897	61.649	54.545	50	318
844	LInD2-384	Chr02	13371867	13573755	12971829	both	CTTTGCGCCAGTCACTACAAGG	CTCTCACGCCATCCATCCCTTA	22	22	62.006	61.606	54.545	54.545	340
845	LInD2-385	Chr02	13399253	13588764		Nip./ZS97	TCTTATCTGGGCCAACGGAAGG	AAGATCAAACTGACTGGCACGC	22	22	62.071	61.7	54.545	50	307
846	LInD2-386	Chr02	13576078	13760864	13159032	both	ACAGGTTCATCATGCCTTTGCC	GTACCCTGAGTGGTTCGAGAGG	22	22	61.729	61.781	50	59.091	336
847	LInD2-387	Chr02	13977028	14030308	13435425	both	GGTTTTAATACTCCCTCCCCGGT	CAGAGCAAGGCAGCTATGTGAA	23	22	61.716	60.938	52.174	50	311
848	LInD2-388	Chr02	13977290	14030618	13435735	both	CAGTGCAACGCAGGAGCATTAT	TGCTGCCAATTGATAGCATGCA	22	22	61.829	61.533	50	45.455	308
849	LInD2-389	Chr02	14059344		13527335	Nip./MH63	CCCTGGATGTAAACACCCCCAA	GTGGGGTTAAGTAGTGGCTCGT	22	22	62.235	61.99	54.545	54.545	348
850	LInD2-390	Chr02	14092691	14150136	13558602	both	TTGGCCAGGAGTCGTCTTCTAC	TCCCCTCTCCATCTAGCGAGAA	22	22	61.724	61.832	54.545	54.545	320
851	LInD2-391	Chr02	14123834	14180982	13589331	both	GAGGGTGAGGGCATTGTCTCTC	CTGCCGCCTTCTGCTAATTGAG	22	22	62.38	61.884	59.091	54.545	328
852	LInD2-392	Chr02	14138385	14195458	13603808	both	TCCCCGATCGAAAAACCCTAGA	ATTTGGTTGTTAACACCGCCGC	22	22	60.889	62.777	50	50	329
853	LInD2-393	Chr02	14149233	14209778	13618134	both	AGACCAGGAATCCACATAGCCG	TCCAGTTGACACCTAGGCCAAG	22	22	61.869	61.941	54.545	54.545	336
854	LInD2-394	Chr02	14334045	14549604	13961127	both	AGTGTACGTACGCGCGTATGTA	AACTCTGGAAGGGGTGTCCATG	22	22	61.863	61.956	50	54.545	348
855	LInD2-395	Chr02	14352469	14568006		Nip./ZS97	AGACTTTCAACCATTGCCCACA	TTTCACCAGAGCACTCGACCTC	22	22	60.689	62.231	45.455	54.545	340
856	LInD2-396	Chr02	14352524		13979521	Nip./MH63	AGACTTTCAACCATTGCCCACA	TTTCACCAGAGCACTCGACCTC	22	22	60.689	62.231	45.455	54.545	328
857	LInD2-397	Chr02	14359909	14575511	13986959	both	CACAGGACACCACAATCCAACG	CCCCCAGTTCTACCTCCGATTC	22	22	61.951	61.866	54.545	59.091	345
858	LInD2-398	Chr02	14438507	14697438	14108906	both	CACTGTTGACGGTCGGTATCGA	AATCCAACCCAAATTCGGCTGG	22	22	62.322	61.735	54.545	50	323
859	LInD2-399	Chr02	14585141	14845405	14257057	both	AAAGGAGCAACTGGACCTAGCC	CGTTTTCCCCTATCCCATGTGC	22	22	62.272	61.586	54.545	54.545	309
860	LInD2-400	Chr02	14624096	14887165		Nip./ZS97	ATCGACTTGAGTGCGGTTACCT	CGCCGATCCCCTTTCCCTTTTT	22	22	61.724	63.432	50	54.545	348
861	LInD2-401	Chr02	14656161	14925010	14336633	both	TCGAGTTCCGGTCTGCTTTGAT	GACTCCGATCTCGATCTCGTGG	22	22	61.983	61.997	50	59.091	316
862	LInD2-402	Chr02	14689499		14370856	Nip./MH63	CGGACGACGGAAGCATTATAAATTT	AAAAAGAGCGAATCGGAGGCG	25	21	60.277	61.598	40	52.381	319
863	LInD2-403	Chr02	14867440	15180553	14612708	both	AAGTTGTGGGCCTCCTAACAGC	ACAATGCGCACATGGATGAGTC	22	22	62.791	61.829	54.545	50	349
864	LInD2-404	Chr02	14899484	15212607	14644765	both	AATCACTCCCTGCTAGTCTGCC	ACTTGACTAGGTAGGCCAGTCG	22	22	61.806	61.206	54.545	54.545	350
865	LInD2-405	Chr02	15032322	15379952	14817480	both	CACTAAGCAAGGCTAAGCATTTGC	CGATACCGGTAAAGGCGATGGA	24	22	61.202	62.221	45.833	54.545	307
866	LInD2-406	Chr02	15191564	15549829	14987359	both	AAATGCCATGCACTTACTCCTAGA	GGGCATGGACATGGGTAAATTCC	24	23	60.08	61.819	41.667	52.174	350
867	LInD2-407	Chr02	15202126	15560353	14997890	both	CCCATCTTTACTCACGGTTCGC	ATGTGGAGTATTTTCAGCCGCC	22	22	61.56	61.265	54.545	50	309
868	LInD2-408	Chr02	15223668	15581985	15019535	both	GGGCATGTTCACTTTGATGCCA	TGTGGGCCATCGGATGTAACAT	22	22	61.985	62.081	50	50	330
869	LInD2-409	Chr02	15266464	15837057	15274629	both	TTAGTTGTTGTTGCTGTGGCGG	AGGGAAAGCGACGGTGTAAAGA	22	22	62.147	61.924	50	50	300
870	LInD2-410	Chr02	15284604	15921284	15358890	both	TATGGACAGTGAACACGAGGGC	TCATCCAACTCCTCCACTCGAT	22	22	62.303	60.624	54.545	50	350
871	LInD2-411	Chr02	15361482	15990919	15428478	both	ATGGCTAGTGATTGTGGGGTCC	GCCATGCAAAAGGGTAGGTACG	22	22	62.086	61.832	54.545	54.545	340
872	LInD2-412	Chr02	15367460	15996861	15434419	both	TGCGTCTCTGGCATACCTAAGT	AGCTCCAAAAATACTTCGGAATGCA	22	25	61.211	61.554	50	40	320
873	LInD2-413	Chr02	15648234	16278228		Nip./ZS97	TTGAATCTGGACATGGGGCCAT	GATACATGGTCCCACCTGCCAT	22	22	62.044	62.153	50	54.545	316
874	LInD2-414	Chr02	15689177	16335001		Nip./ZS97	TTTTGGGGCATCCTCACATGGT	GCGCGAATGCACGACTTAATAC	22	22	62.506	60.903	50	50	330
875	LInD2-415	Chr02	15829085	16486181		Nip./ZS97	ACGATCTTCGGGTGTCTCACAG	TGGGCCCATAGAGGTTAGAGGA	22	22	62.028	61.793	54.545	54.545	332
876	LInD2-416	Chr02	15829745	16486865		Nip./ZS97	CCTACTCCCTCCGTTTCACAATG	TGGTAAACATATGAAAGTGCCAGCA	23	25	60.927	61.27	52.174	40	350
877	LInD2-417	Chr02	16016611	16685460		Nip./ZS97	AACGGGCGACTAAGAGCAAGAT	GGAGCGAGATTTGCATCTTCCC	22	22	62.049	61.639	50	54.545	338
878	LInD2-418	Chr02	16053459	16709594		Nip./ZS97	CGCTCACGAACCTAAAGGCAAG	TAACTGCGGAATTCCTGCGAGA	22	22	62.056	62.044	54.545	50	345
879	LInD2-419	Chr02	16071340	16724450		Nip./ZS97	TGATGCTGCATCAGTTAGGTTCG	ATGTTTATAGCATAGCCGATCAGGT	23	25	61.231	60.046	47.826	40	306
880	LInD2-420	Chr02	16073816	16726950		Nip./ZS97	ACGGCGTTTTGCTTTTAGTGGT	CTTGTCCCTAGTGGCCAGATCC	22	22	61.837	62.131	45.455	59.091	337
881	LInD2-421	Chr02	16186291	16841124		Nip./ZS97	TCGTCGTAGGTGATGCTAAGCA	CGATTTTTCCATACGGGCCACT	22	22	61.518	61.262	50	50	326
882	LInD2-422	Chr02	16200762	16852847		Nip./ZS97	GGCCGAGTTTAGATCCAAACGT	TCAGACAGGACCTTCAATGGCT	22	22	60.934	61.36	50	50	323
883	LInD2-423	Chr02	16227769	16882701		Nip./ZS97	TAGAGGCATACCGAAGAGCGAC	TCTGAAGCTGCAAGAGAAAGCA	22	22	61.641	60.486	54.545	45.455	303
884	LInD2-424	Chr02	16304107	16935296		Nip./ZS97	ACCATGGAGTTTTAGGCCCACA	TGCCTTGGGAGTGTAGAGATGC	22	22	61.904	62.064	50	54.545	314
885	LInD2-425	Chr02	16320514	16951578		Nip./ZS97	TTCGATCCGTTGATCCGTTGGA	GTTGCAACGGATGAAGGCTATTT	22	23	62.04	60.119	50	43.478	310
886	LInD2-426	Chr02	16322223	16952328		Nip./ZS97	GAAGAAGCGAGAGGAAGGGAGG	CTGCAAGATGGCTCGCGAAG	22	20	62.109	62.033	59.091	60	315
887	LInD2-427	Chr02	16403447	17032684		Nip./ZS97	TGATAACTCACCGGTTCGAG	CAACCGACTGTGACCTTTGC	20	20	62.352	62.194	54.545	54.545	329
888	LInD2-428	Chr02	16455124	17088912		Nip./ZS97	GAGATCATCCGAGCGCCAAAAG	AGGGACGACAGGTACAGGCT	22	20	61.936	62.443	54.545	60	336
889	LInD2-429	Chr02	16522013	17155731		Nip./ZS97	TGGTGGGAACGAAGACTAGAGG	GCTGCGAGCTGTTTGTTTTCCT	22	22	61.145	62.461	54.545	50	347
890	LInD2-430	Chr02	16564263	17189338		Nip./ZS97	AACATGGGAGGTACACTGGTGG	GATAAGGCTTCCCGTCTCCTCC	22	22	61.952	61.922	54.545	59.091	319
891	LInD2-431	Chr02	16576345	17201562		Nip./ZS97	AGTTTCAGCCTCAGTCCTTGTCT	GTGGCTTGGAGGTTCAGGTTTT	23	22	61.519	61.277	47.826	50	347
892	LInD2-432	Chr02	16657198	17272919		Nip./ZS97	ATGCACCTTAATGTCATCGGCG	CGCTGGATCTGACAATTGAGCC	22	22	61.635	61.884	50	54.545	304
893	LInD2-433	Chr02	16734066	17347417		Nip./ZS97	TGCAATATCTTGAACGGTGAACGA	TCTCCTCTCCTCTATCATCCACCT	24	24	61.094	61.201	41.667	50	341
894	LInD2-434	Chr02	16746405	17363869		Nip./ZS97	CCTCTGTCGACGGGAGATACAC	ACACATCCACCACAGCTTACGA	22	22	61.888	61.927	59.091	50	300
895	LInD2-435	Chr02	16749793		16816546	Nip./MH63	TCAGCCGTGACATCACTGTTCA	CCTCACTTCACTAGTCCGTAGCC	22	23	62.175	62.036	50	56.522	337
896	LInD2-436	Chr02	16754182	17371967		Nip./ZS97	GCTGTGTACTGCCTCTCTTTGG	GCTCCACCCTCCACCACATTTA	22	22	61.19	62.278	54.545	54.545	323
897	LInD2-437	Chr02	17160078	17723992		Nip./ZS97	TCACAGGCCGAGCAGAGTATTG	ATTGTGTTGTGTGTGGGGGTTG	22	22	62.361	61.797	54.545	50	340
898	LInD2-438	Chr02	17183686	17749543		Nip./ZS97	CCTGCAAGCTTCAGCATCCATC	ACTGCGGTACACCATTACACTTT	22	23	62.154	60.495	54.545	43.478	345
899	LInD2-439	Chr02	17372520	17946341		Nip./ZS97	ATTCCAGTACAGCCGTCCTTGG	ACGTACGTTGTGAGAGACTCCG	22	22	62.321	61.999	54.545	54.545	332
900	LInD2-440	Chr02	17459316	17991397		Nip./ZS97	GGATAGCTTTCACCTCCTGGACA	CGTGGCCTGCTGTAGTAGTAGT	23	22	61.704	61.522	52.174	54.545	332
901	LInD2-441	Chr02	17460039	17992229		Nip./ZS97	GAGGGCGAGAGAGAGGGAGATA	AGCCCGACTGCCTGTAACAATA	22	22	61.947	61.741	59.091	50	341
902	LInD2-442	Chr02	17510175	18038590		Nip./ZS97	ATCCGCTGGGCTTTGCTTAGAT	GCACTGCTATTCCCTCGATTGC	22	22	62.405	61.946	50	54.545	350
903	LInD2-443	Chr02	17510494	18038957		Nip./ZS97	AGAGTGTCCTTCGCCTCAAGAC	GAAGGCGGCAAAAGGGGTTAAA	22	22	61.978	61.922	54.545	50	320
904	LInD2-444	Chr02	17527196	18055630		Nip./ZS97	CGGAATCGCGACATCAAACGTC	CCGAATGGGCGACATCGATAAG	22	22	62.692	61.491	54.545	54.545	304
905	LInD2-445	Chr02	17863741		17751738	Nip./MH63	GTGGCAGTTTGACGGGTTAGTG	TTTTTATGGGGGTGGGGTTGGG	22	22	61.948	62.792	54.545	54.545	333
906	LInD2-446	Chr02	17872786	18308641	17768809	both	CTTGTGGTTCTTGGCCCAATCC	TGTGTGTTTAAGTCCGACCAAGT	22	23	61.986	60.37	54.545	43.478	307
907	LInD2-447	Chr02	17968913		17885949	Nip./MH63	AGTAGTCCGCCAGCGAAAATGA	AGCACGATTAACCGTCCAGACT	22	22	62.303	61.724	50	50	349
908	LInD2-448	Chr02	18041999		17958561	Nip./MH63	TTCCACACCGGCTGTTAGTTCT	GTGCAGAAGGTAGAGCCACAGA	22	22	61.871	61.987	50	54.545	302
909	LInD2-449	Chr02	18061975	18517291		Nip./ZS97	GGCCGGATAGTGAGTGTGTACG	TACACACATGTTTTGCCTGCCG	22	22	62.705	62.212	59.091	50	300
910	LInD2-450	Chr02	18070197		17990226	Nip./MH63	GAGGAAGAAGGGGAGAGGAGGA	CTCGTGAATAGGACTTGGGCCA	22	22	62.047	62.059	59.091	54.545	311
911	LInD2-451	Chr02	18489163		18482004	Nip./MH63	ATTTACGAGTCCGGAGACCCAC	CCTCATGGGCCTAGAGTTTGGG	22	22	61.787	62.405	54.545	59.091	305
912	LInD2-452	Chr02	18568854	19089019	18557365	both	CAGTGACTTGCTTGGGTTTGCT	GCCATGTTAGCACGGTGAAACA	22	22	61.848	61.957	50	50	306
913	LInD2-453	Chr02	18577703	19098740	18565837	both	ATTATGGAGTGGCAGCACACCT	TCAATGGTAGCATTTGAACTGGCA	22	24	62.023	61.293	50	41.667	317
914	LInD2-454	Chr02	18645998		18635203	Nip./MH63	TCGCCCGCTCGCAAAAATAAAA	GCTACAACGGTATTTGTGCGCT	22	22	62.268	62.062	45.455	50	326
915	LInD2-455	Chr02	18646943	19169949	18636174	both	ACCAAATAAGTGGCTTCCAGGC	GCCAGCATCTCGTTTCTGATCG	22	22	61.147	61.926	50	54.545	305
916	LInD2-456	Chr02	18863530	19366757		Nip./ZS97	AAGGAAGTGGCAAAACAGCATG	ACATCCATCGTTTGGCTCGGTA	22	22	60.224	62.055	45.455	50	340
917	LInD2-457	Chr02	19042604	19553082	18900175	both	GCAGTCCGCACCTATAGCTTGT	CACAGATTTCGCCCTCTTTCACT	22	23	62.68	61.115	54.545	47.826	326
918	LInD2-458	Chr02	19180186	19692598	19037526	both	GATTTGGGGGTTTCGCTTCGAG	AGGGAGAGGAGGGGAAAGAGAC	22	22	62.077	62.316	54.545	59.091	350
919	LInD2-459	Chr02	19188834	19701298		Nip./ZS97	ACCACTGCTGCTTCTCTCTCTC	CCTTTCCGGTGTCAATCCAAGC	22	22	61.726	62.027	54.545	54.545	320
920	LInD2-460	Chr02	19257898	19780954		Nip./ZS97	GTGGCTTTGAGAACTTCTGCCC	ACGATTTTGGATGGGATACGCG	22	22	61.966	61.376	54.545	50	348
921	LInD2-461	Chr02	19308236	19830032		Nip./ZS97	ATTACTCCCTCCATTTCACAACGT	TGTGTGACCTCGCTTCTTTTCG	24	22	60.263	61.37	41.667	50	331
922	LInD2-462	Chr02	19342070	19862785		Nip./ZS97	TCCCGTACTGAAAATGCTCCGT	TTCCATGGCTGTCCGTCTTACC	22	22	61.989	62.316	50	54.545	331
923	LInD2-463	Chr02	19364411	19885295		Nip./ZS97	ACCACTACAGTAGCATCAAAACCG	TAGCGCAGTGGTAAACCTGACT	24	22	61.096	61.666	45.833	50	311
924	LInD2-464	Chr02	19544670	20049392		Nip./ZS97	ATGGGACTAAGGGGGTGTTTGG	AAAAGTAGCGGTGGTGGTGAGT	22	22	61.973	62.133	54.545	50	326
925	LInD2-465	Chr02	19657678	20157389		Nip./ZS97	CGGCATCAACATGGTTCTGGTC	CCTACCCTGCGTGGTATTCACA	22	22	62.081	62.055	54.545	54.545	347
926	LInD2-466	Chr02	19684194	20189659		Nip./ZS97	TGGCGTATCACTGTCTGGAAGT	CAGTGGCCCTGTTCAATGTTCT	22	22	61.407	61.077	50	50	324
927	LInD2-467	Chr02	19709284	20214583		Nip./ZS97	GAACTTGTAGCTGATGCGGCTG	CGTTTCTACAGCTACCTCTGCCT	22	23	62.124	61.987	54.545	52.174	331
928	LInD2-468	Chr02	19757537	20273785		Nip./ZS97	AGTACAACAGACACCCACTGCA	CATGCATTTCGGGGTCCATACC	22	22	61.807	61.651	50	54.545	332
929	LInD2-469	Chr02	19883189	20409781		Nip./ZS97	GTGCACTGCGATTGAGCTCAAA	GGCTTGGCTTTTGGTGGATTGA	22	22	62.258	61.93	50	50	321
930	LInD2-470	Chr02	19886567	20413164	19744331	both	CCCGCACCAAATTCACTCTGAC	CACCGGAATTGGAGAGAGAGCA	22	22	62.016	62.053	54.545	54.545	327
931	LInD2-471	Chr02	19957109	20474150		Nip./ZS97	AATGACACGAGACCGCTTGACT	ACGAAAACCGGACGCACTATTG	22	22	62.231	61.745	50	50	340
932	LInD2-472	Chr02	20088202	20616708		Nip./ZS97	TGCATTTGATCATCGATCGCCG	TACACCCTAAGTACGCAGTCGC	22	22	61.994	62.081	50	54.545	341
933	LInD2-473	Chr02	20153341	20675976		Nip./ZS97	CCAAGGCCGTGGAAACTGAATC	CTGCTGCAGCTGTTTCCTCTTC	22	22	62.027	62.014	54.545	54.545	318
934	LInD2-474	Chr02	20249657	20771052		Nip./ZS97	AGAGGCTGTTGCAGTTGTTCTT	GCAGTCTTCTCACCTGAAGCCT	22	22	60.685	62.252	45.455	54.545	325
935	LInD2-475	Chr02	20279895	20794947		Nip./ZS97	CGCATATGGCTTCTCAAGTGGC	CGCCATCAACTAGCAGGAACAA	22	22	62.199	61.193	54.545	50	328
936	LInD2-476	Chr02	20299129		20157670	Nip./MH63	ATTGGTGGTGAATTCGCCCCTA	TGACTCTCTCCTCACGCTTGTG	22	22	62.025	61.966	50	54.545	304
937	LInD2-477	Chr02	20357688	20878769		Nip./ZS97	TCTGCACGTCACCCTAAATCCT	GGCTCAATAGATTCGTCTCGCG	22	22	61.415	61.477	50	54.545	304
938	LInD2-478	Chr02	20397784		20256288	Nip./MH63	GTGAGTACCACTTGCATTGTGCA	TCTTGGCGAAAGAAGACGACCT	23	22	61.85	61.917	47.826	50	318
939	LInD2-479	Chr02	20401857		20260331	Nip./MH63	AGTGGCTGCAATTCACTCTAAAAGA	CGTGGGCAAGCATCTTAGGTTG	25	22	60.978	62.081	40	54.545	344
940	LInD2-480	Chr02	20501231		20363104	Nip./MH63	AGCTAACCATTGGACTCTGAGCT	TGGTGGGTCTTGCCGAGATTTA	23	22	61.393	61.683	47.826	50	327
941	LInD2-481	Chr02	20515586	21105809		Nip./ZS97	CAAGTGCTACTCCCCCGTCTTA	GATCGAACAGTTTGCTGCTGCT	22	22	61.471	62.01	54.545	50	329
942	LInD2-482	Chr02	20566809	21251410		Nip./ZS97	ACCATGAAATAGTCGCCACTACAA	AGCACATTGGTCGAGTTTACTTGT	24	24	60.323	60.982	41.667	41.667	337
943	LInD2-483	Chr02	20672272	21357562	20535234	both	TTGCTTGACCTAGGTTGAGCCA	CCGTGTACATATCACTGCAGCC	22	22	61.884	61.372	50	54.545	345
944	LInD2-484	Chr02	20757489	21439999	20617670	both	TCCACACGACAAGAAAACACGG	TCCTTATCCGGAACTCCCTCCA	22	22	61.564	62.048	50	54.545	317
945	LInD2-485	Chr02	20836232	21533500	20711180	both	TGCTACACCATCGCCGAGAAT	GAGGATCTTACCTAGTGCGGG	21	21	62.724	62.232	54.545	59.091	312
946	LInD2-486	Chr02	20912100	21617466	20795146	both	CCGGGGCAGCGTTATTAGTTTC	AACTAACTCGCTTGGAAACCGC	22	22	61.884	61.694	54.545	50	328
947	LInD2-487	Chr02	20960950	21662173	20839854	both	ATTTTGGTCCCCCATCGTTTGG	CGTCGTGAGTTTGACCTCCTCT	22	22	61.414	61.963	50	54.545	336
948	LInD2-488	Chr02	20979885	21681079	20858759	both	TGTCTCATTCCACCAAAATCGGT	AATAAGCGCTCGTTTTGGTGCA	23	22	60.498	61.957	43.478	45.455	318
949	LInD2-489	Chr02	21000730		20880591	Nip./MH63	AGTGGGACTGATAGTCTTGTTGAGT	CCACCCTATGGCAGCATTGTCT	25	22	61.222	62.667	44	54.545	314
950	LInD2-490	Chr02	21044955	21780979	20958676	both	CACCAGTGAGCATGCAAACGAA	GATCGAAGCTACAAAATTGCATGCA	22	25	62.205	61.182	50	40	310
951	LInD2-491	Chr02	21050437	21786396	20964093	both	GAGTCGGAGGAGAGGATGGATG	GGGCGGCATGGTCTATTTTTGT	22	22	61.399	61.788	59.091	50	350
952	LInD2-492	Chr02	21108206	21855351	21033050	both	CCTTTTTCGTCTTCCGTGTGGG	TGAGTGAGCAAGTGTTGTTCCT	22	22	61.948	60.093	54.545	45.455	337
953	LInD2-493	Chr02	21310636	22018824		Nip./ZS97	TAGGGTGTCGCATAGGGTGTTC	CCGCTATTCGTTTTTAGGCCCT	22	22	61.795	61.003	54.545	50	302
954	LInD2-494	Chr02	21447823	22148959	21140707	both	GATTCCCCGCGTCTCCATTTTT	TAGGCCATGAGAGCGAACGTAG	22	22	61.521	61.897	50	54.545	312
955	LInD2-495	Chr02	21462259	22164824	21156575	both	CCGTCCGTCGATTCTCATCAGA	AGGATGGGGTTCTTGTGGAAGG	22	22	61.887	61.967	54.545	54.545	344
956	LInD2-496	Chr02	21484939	22185114	21176867	both	GATACGACCATCGCATGCATCC	TCGGTCGATCGTAACATTGGACA	22	23	61.807	61.974	54.545	47.826	307
957	LInD2-497	Chr02	21625210	22319570	21310865	both	AACGCAGTCCCTAGCTAGTAGC	ACACGTACAGCACAGATCGACA	22	22	61.588	61.958	54.545	50	317
958	LInD2-498	Chr02	21715131	22407764	21399061	both	CCTGTGATTATAATCAAGGGGGTCG	AGCACAACATACCGTGACGCTA	25	22	61.031	62.286	48	50	336
959	LInD2-499	Chr02	21739625	22414473	21405770	both	GAACCCGATCTCATATCCGCCA	CGGATTCTCACGGCTGCATTTA	22	22	61.983	61.314	54.545	50	307
960	LInD2-500	Chr02	21750315	22421499	21412797	both	TCAAGTCTGCCAATGTGCTTG	TTTGCGGCAAAGAGTGGTTGAG	21	22	62.221	62.152	50	50	302
961	LInD2-501	Chr02	21962249	22639536	21528416	both	ATCTCGGCTATGCTAGTTGGCT	CTCTTTTGCCATCCCACCCTTG	22	22	61.347	61.729	50	54.545	331
962	LInD2-502	Chr02	21972274	22649866	21538749	both	TCTTCATTACTCCCTCCATCCCA	GAGGGAGTAGGCACCTGTCAAG	23	22	60.311	62.054	47.826	59.091	344
963	LInD2-503	Chr02	22159917	22857050	21745917	both	ACTATCGGTAAACGGTAAAGTGCA	CACGCTTGGAATTGGTAGCCAC	24	22	60.322	62.331	41.667	54.545	312
964	LInD2-504	Chr02	22238702	22919037	21807522	both	AGGGCTTATTTCACTTCTTCGACA	TAGGGCCCTTTTGAATTGCAGG	24	22	60.263	61.152	41.667	50	343
965	LInD2-505	Chr02	22241322	22921685	21810170	both	TCGCAAGCGAAAAATTTTGACGTG	AGGCGATTAGCTAAGGCCTTAGT	24	23	62.043	61.262	41.667	47.826	343
966	LInD2-506	Chr02	22286535	22970037	21858514	both	CCCAAAGCGTTCCAGCATGAAA	AGTGGTGAGTTAGAGGCGTTCC	22	22	62.228	61.984	50	54.545	343
967	LInD2-507	Chr02	22332163	23010309	21898792	both	GGAATTTCGGGGGTTTTGCTGT	ATTTGGATCCCCGGTAGCGAAT	22	22	61.927	61.885	50	50	305
968	LInD2-508	Chr02	22394894	23074840	21963323	both	ACACAAGCTCTGCCAACATGTG	GCAATCTGCAAGGTCACCACTC	22	22	61.903	62.02	50	54.545	343
969	LInD2-509	Chr02	22701780	23113566	22166001	both	GTAGCACTGGGCCTATTCAGGT	ACGTGGCTGAGCTGTCTTTAGT	22	22	61.812	61.921	54.545	50	345
970	LInD2-510	Chr02	22732026	23143521		Nip./ZS97	ACACAAGGTAATACTCCCTCCGT	GGCCGAACCCCAATTACCTCTT	23	22	60.82	62.605	47.826	54.545	340
971	LInD2-511	Chr02	22870729	23340504	22392920	both	AGCACAGCTCCAATTCCAGG	GAGGAGGCAAGCTAGGAAGG	20	20	62.22	62.38	50	59.091	328
972	LInD2-512	Chr02	23115969	23577721	22630134	both	TTTTCGTTCAGCATCATCCCACG	GAGAGGAGACGAGACGAGACGA	23	22	61.961	62.648	47.826	59.091	300
973	LInD2-513	Chr02	23177127	23635639	22688048	both	ACTGCATGGTCTAGGAGGAAGA	GATGTGGGTCCCATGTGACAGA	22	22	60.293	62.007	50	54.545	346
974	LInD2-514	Chr02	23522014	23772737	22965990	both	TCCTCCTGGAAATGCTGTCGTT	GCTAGTCATCCCGCTGTTCAGA	22	22	61.941	62.104	50	54.545	335
975	LInD2-515	Chr02	23604611	23851166	23044417	both	TCTCGCACAGCTATAGTTTCCCT	TGGTCATTTGATCCCTTAACATGGA	23	25	61.192	60.281	47.826	40	338
976	LInD2-516	Chr02	23842435		23285030	Nip./MH63	GTCCGCGAACTGACCTCAAAAG	ACGTGGTCGGTGCCATATAGAG	22	22	61.992	61.907	54.545	54.545	310
977	LInD2-517	Chr02	23975905	24215166	23408556	both	TGCTAGGCTGCGTTTGCTTTTT	TGGACGATGTATATGCCCCACC	22	22	62.163	61.937	45.455	54.545	330
978	LInD2-518	Chr02	24022510	24280689	23474080	both	ACTCGTCAGTAGTTCCTTGCGT	TTTGCACGTCCAACTGTCCAAG	22	22	61.65	61.831	50	50	325
979	LInD2-519	Chr02	24026628	24288447	23481839	both	GTGCTCTACACCATCTTGAAATGTG	TTGGATGAGTTTGATCACATGGCA	25	24	60.391	61.053	44	41.667	300
980	LInD2-520	Chr02	24079197	24330694	23524091	both	CTGGGTCATCACCGCATCAGTA	GCTGTCAAATACTACCAGGCGC	22	22	62.114	61.878	54.545	54.545	335
981	LInD2-521	Chr02	24118772	24370431	23563829	both	AGAGAACATGGCATTCACAGTCA	AACAAATTTTGCGCAAACCTGC	23	22	60.245	60.223	43.478	40.909	319
982	LInD2-522	Chr02	24141018	24393047	23586445	both	GTGGCTTCGGGGAACTTGAAAC	TGTCTGCTGTCCTGACTGTGTT	22	22	62.214	61.802	54.545	50	317
983	LInD2-523	Chr02	24531437	24755050	23948448	both	AGTGATGCGTAATGTTTGGGCG	GGACACAAGGATTTTGAGGTCGG	22	23	62.076	61.667	50	52.174	300
984	LInD2-524	Chr02	24628528	24851243	24044640	both	TTATGTTCACAATGAGGGCCGC	TCGGCACACAGATGAAACCTCT	22	22	61.52	61.931	50	50	334
985	LInD2-525	Chr02	24673491	24894319	24120267	both	GCTGACTCCCTCAACTGTGTGA	CATGGCAGTTCTCCCCTCTGAA	22	22	62.181	62.012	54.545	54.545	345
986	LInD2-526	Chr02	24703746		24153764	Nip./MH63	GCAGGCCGTTCATCTTCTTCCT	AGGCTAGCTCAGGTTGCAACTT	22	22	62.893	62.209	54.545	50	350
987	LInD2-527	Chr02	24829374	25047602	24272713	both	TGCAATATGGAGTGCTCGTCCA	TGCCCAGCTCCTGATGATTTCA	22	22	62.058	62.022	50	50	336
988	LInD2-528	Chr02	24854448	25072466	24297578	both	CAAGCCCTCCAACCTGCATTTT	TCTTCAGTTTGGCAGCTATCTCTT	22	24	61.934	60.02	50	41.667	323
989	LInD2-529	Chr02	24997574	25227744	24452836	both	TTCGCTAGGAACCGAAGAAGCT	AACGGCCAGAAGAAACGTAGGA	22	22	61.724	61.924	50	50	348
990	LInD2-530	Chr02	25190659	25404111	24629190	both	GCCCTATATAAACCCCTCCCGT	TCTGCACACACAACCACACAAC	22	22	61.096	62.021	54.545	50	324
991	LInD2-531	Chr02	25210536	25424031	24649106	both	CCGCCATCTGCTATTTCCTCCT	AGATGTTACACGCCGCTGTTTG	22	22	62.197	62.001	54.545	50	321
992	LInD2-532	Chr02	25225485	25438882	24663958	both	TTTCGTCATTTGTCCGCTCTGC	CAAGGGAACACACACGCATGAC	22	22	62.001	62.506	50	54.545	323
993	LInD2-533	Chr02	25326740	25536231	24761313	both	ACTCTCTTCCCGTGCACGTAAA	TGGCCACTAGTTAAGGGAGTCA	22	22	61.913	60.494	50	50	309
994	LInD2-534	Chr02	25361821	25625783	24850857	both	GACAAAACCGCTCTGGAATGGG	CGGAGGAAGTATATGAATGTGGGC	22	24	62.027	61.098	54.545	50	319
995	LInD2-535	Chr02	25732207	25886862	25216596	both	TTACTGCAGATCGGTGCTCCAT	CAAGCAGAGAATTAGGCCACGC	22	22	61.802	62.135	50	54.545	323
996	LInD2-536	Chr02	25758505	25913159	25242889	both	GTCGTAACCTGTGCATGCCATG	GATCGAGCCCGCGTTTGATTAG	22	22	62.383	61.982	54.545	54.545	314
997	LInD2-537	Chr02	25783219	25937406	25267135	both	AACCAGAGCAGCGAAAGGTTTG	CGACAGTCCTGATTAAGGCCGA	22	22	61.9	62.099	50	54.545	350
998	LInD2-538	Chr02	25814097		25297997	Nip./MH63	GGAGGGAAAGAGACGGAAGACA	CAAATGTTGAAGAGCCGCACCA	22	22	61.408	62.216	54.545	50	348
999	LInD2-539	Chr02	25902336	26063418	25393191	both	ACGAGGCAATGGATTAGAGAGCT	GCGCAGTAATTTGAGTCTGTTGC	23	23	61.511	61.207	47.826	47.826	341
1000	LInD2-540	Chr02	26087927	26259212	25523212	both	TTTGACATGAGCCATGCTGCAC	ACCTCACAAAAACTGGCCATGT	22	22	62.286	60.955	50	45.455	308
1001	LInD2-541	Chr02	26109516	26280558		Nip./ZS97	GGTCAAAAGGAGACAAAGGCCG	AGCGGCTGATGCAGTTCAAAAA	22	22	61.962	61.909	54.545	45.455	306
1002	LInD2-542	Chr02	26160178	26330251	25594245	both	GACTTCATCTGTGCAGTGGAGC	TCATTGCAAGAAACCGAACGCA	22	22	61.504	61.891	54.545	45.455	305
1003	LInD2-543	Chr02	26491710	26433149	25911521	both	TCAACACTAGCCTAGCAGGTCT	ACCATCCCCACTATTTCCTAGCC	22	23	60.558	61.531	50	52.174	348
1004	LInD2-544	Chr02	26563808	26505164	25983545	both	AGGCCGTGTTTAGATCACCCTC	TGACCCCTGATGAAGTCATGCA	22	22	62.06	61.689	54.545	50	346
1005	LInD2-545	Chr02	26587778	26526852	26005234	both	GGCCTATTTCTTGAAGTCCGCG	GCGGGCTAACGGGACCATATAT	22	22	61.878	62.056	54.545	54.545	324
1006	LInD2-546	Chr02	26676455	26597180	26075515	both	GGGCGCCCGATACATATAGCAT	GCCCGCTACTCTTCTCTCTCCT	22	22	62.435	62.978	54.545	59.091	349
1007	LInD2-547	Chr02	26707254	26628108	26106442	both	AGAAGGCCACAGACTGACAGAC	CCCTGAATCCAAGGCCTCGATA	22	22	61.926	61.615	54.545	54.545	300
1008	LInD2-548	Chr02	26845940	26750017	26228388	both	ACCCCCTTTGAAGTCTTGGGTA	AGTTCTCGTGTTGAAGCTGTGT	22	22	60.972	60.419	50	45.455	305
1009	LInD2-549	Chr02	26875587	26781217	26259588	both	ACACTGGATGAGCAACAGCATT	CCATGTGTTGTTGCCATCATATGC	22	24	60.817	61.266	45.455	45.833	341
1010	LInD2-550	Chr02	27027820	26913222	26391607	both	TCCTCGTGATTGGATGATGGCT	TCCTGCTTTCACATCCATCCCA	22	22	61.551	61.698	50	50	300
1011	LInD2-551	Chr02	27065384	26979842	26458212	both	ACTGCGCTAAGTGACTCCACAT	GCGAGTGTAGCGTACATGCATG	22	22	61.987	62.22	50	54.545	324
1012	LInD2-552	Chr02	27441880	27149289	26711757	both	GGATCGATGGGAGAGCCAGATC	GGTGGCAGCCGAACAACAATAA	22	22	62.047	61.967	59.091	50	340
1013	LInD2-553	Chr02	27502342	27209145	26771608	both	CATGCAAGAAACGGGTGGATGT	CGTTTCGCTTCACTGGGACTTC	22	22	61.717	61.992	50	54.545	333
1014	LInD2-554	Chr02	27549380	27252167	26814630	both	TACCTCCTAGCCTTTGCAGCTG	CCAACAACTCCAATCCCCGTTG	22	22	62.064	61.971	54.545	54.545	342
1015	LInD2-555	Chr02	27637733	27338592	26901040	both	GGACGTGTGAGCCTGTGTCTAT	TCGCAAAGAAGCCATACACTCA	22	22	62.039	60.289	54.545	45.455	332
1016	LInD2-556	Chr02	27734245	27430910	26993369	both	TGACAGGGCTGAATGTGTTCTT	TCATCGTCAACAGACAACAGGGT	22	23	60.159	62.066	45.455	47.826	344
1017	LInD2-557	Chr02	27739244		26997804	Nip./MH63	CAAACGAGATGAACCCGCCATG	CCGCCCCAGAAGAGAAGAGAAG	22	22	62.383	62.367	54.545	59.091	342
1018	LInD2-558	Chr02	27828240	27516804	27079181	both	TAAATGCATCCGCCCATCCCAT	TGTCCCCCTGAACAAATTAGAACA	22	24	62.492	60.141	50	41.667	331
1019	LInD2-559	Chr02	27853523	27546519	27108897	both	TCTTCCCTTGCGTGTCATCAGT	ACTGTCTTCCGGGATCAATGCT	22	22	61.931	61.749	50	50	339
1020	LInD2-560	Chr02	27857431	27550485	27112863	both	TGCATTGAGTCAGTGCACAACA	TGGTGTGACGGAAAAGTTGGAA	22	22	61.263	60.618	45.455	45.455	339
1021	LInD2-561	Chr02	27869610	27562619		Nip./ZS97	TCGGAAGGAGTTGGGGTGATTC	GCAGGTTTGACCCATGACCAAG	22	22	62.004	61.976	54.545	54.545	323
1022	LInD2-562	Chr02	27931713	27625595	27187988	both	ACAAAAACCGAAATGCATGCGC	CTTAGCTGCTTCCGTTCTTGGC	22	22	61.99	62.071	45.455	54.545	346
1023	LInD2-563	Chr02	27998588	27697887	27260285	both	TAGGACCAGCCGTGTCTAGCTA	CCGGTCTACTCCCTCCGTCTTA	22	22	62.078	62.392	54.545	59.091	329
1024	LInD2-564	Chr02	28040819	27746413	27308815	both	GGACGGAGGTAGTACCCTATAAACA	TGGACCATGTTAGAGCAGGTACA	25	23	60.924	61.075	48	47.826	350
1025	LInD2-565	Chr02	28139012	27825174	27387576	both	CGCCACGTGGGAGTCCTATAAA	GGGGTAAGGATTGATCGCTCCT	22	22	62.106	61.616	54.545	54.545	314
1026	LInD2-566	Chr02	28419892	28100424	27662832	both	GCGGGGCATTTTATTAGGCTCC	ACCATGGTTGATTGGTTGGTGC	22	22	61.972	61.93	54.545	50	328
1027	LInD2-567	Chr02	28429130	28110159	27672567	both	TGGGACCCACATGTTAGTTACACA	GGAGAGGAACGGTAGAGCCAAG	24	22	61.734	62.105	45.833	59.091	338
1028	LInD2-568	Chr02	28482587	28162808	27725217	both	AGATTACCCCTCCGAATACGCG	TGCAAGACGAAGCAACAGCAAA	22	22	61.969	62.086	54.545	45.455	349
1029	LInD2-569	Chr02	28486504	28166661	27729070	both	CGTCGACTACTCAGAGCGACTT	CCATCCCTCTTGTCCCCATTCC	22	22	61.805	62.418	54.545	59.091	344
1030	LInD2-570	Chr02	28496604	28175397		Nip./ZS97	ACAGTCACGTCCTACAAATCTCCT	TATGGGACGGAGGGAGTAGCAA	24	22	61.295	62.367	45.833	54.545	345
1031	LInD2-571	Chr02	28563242	28243745	27806145	both	ACTTTACCATTGCGGGTGCTC	TGTGTGCCGCTAGTTGCTTA	21	20	62.528	61.066	50	45.455	348
1032	LInD2-572	Chr02	28871920	28359911	28119916	both	TGACACGGTGAAAATTGCAGCC	CTGCAGCACGGACTCTAAGACA	22	22	62.467	62.284	50	54.545	304
1033	LInD2-573	Chr02	28914820	28429753	28194622	both	GCAACATAGTGTCCCATGTGGC	GTCGAGCTTTGCGAGTGGTG	22	20	62.092	61.891	54.545	60	306
1034	LInD2-574	Chr02	29073315	28558188		Nip./ZS97	ACCTTTCAAGTTCTGCAGATCAGC	CTATTGCACGGGGATTTGCTCG	24	22	61.577	62.194	45.833	54.545	335
1035	LInD2-575	Chr02	29130099	28615078	28384241	both	TGCCTGATTCTGAGTCCACATGA	CGGTACAAGTTTAGGGACCGGT	23	22	61.642	61.986	47.826	54.545	346
1036	LInD2-576	Chr02	29229926	28709835	28473259	both	TGATTATGGCCACCAGATTACCGT	TGCTGTTATGAAATCTGGAGGACCT	24	25	61.973	61.815	45.833	44	300
1037	LInD2-577	Chr02	29232770	28712720	28476144	both	GAGCGGCACCTGTAAATAGCAC	TGAACTGGCAGAATTGAGTGTCA	22	23	61.878	60.433	54.545	43.478	317
1038	LInD2-578	Chr02	29298857	28777828	28541260	both	GTGAGCTGTTCAGAAGATTGGCT	TGGACGGACAAGTAGCATGTCT	23	22	61.117	61.407	47.826	50	304
1039	LInD2-579	Chr02	29603606	29103747	28649582	both	ACAGAGCAGGCTTGTTTGGT	TTCTTGTTGGTAAAGCTGCG	20	20	61.213	62.213	45.455	50	308
1040	LInD2-580	Chr02	29922690	29419571	28971114	both	TGTCGTCGTTGATCGGGTAGTC	GTACCCCAACGAGTACCCCTTC	22	22	62.07	62.053	54.545	59.091	312
1041	LInD2-581	Chr02	30019975	29534363	29085897	both	CAAAGTTGTAGGTCGCGTCGAG	AGTGTGTCTGGCATGTTAACCA	22	22	61.783	60.159	54.545	45.455	311
1042	LInD2-582	Chr02	30191205		29253787	Nip./MH63	ACGTCGAAATTGTAGCTAGCTAGGA	AGTCCCGGTTGGTGTCTAAAGA	25	22	61.659	61.023	44	50	350
1043	LInD2-583	Chr02	30204380	29720371	29266991	both	GCTCGTACTCGGGGTGTGTTTA	AACCGAGGCCGAGTTTACTTCT	22	22	62.282	61.667	54.545	50	327
1044	LInD2-584	Chr02	30325134	29847301	29393934	both	ACAGCCCAATGTCCTTCAAGTG	CGTCGTGGGAACAAAGGGTTAG	22	22	61.077	61.438	50	54.545	345
1045	LInD2-585	Chr02	30384285	29941706		both	TGATCGATTGGGACATGACGGT	AGATGAGTGGCCAAACAATGTAAGA	22	25	61.798	60.749	50	40	317
1046	LInD2-586	Chr02	30403471		29480960	Nip./MH63	GGACGACGGAAGCACCTTTTT	CCAGACCGGTCCCATCCAAAAA	21	22	61.412	62.798	52.381	54.545	336
1047	LInD2-587	Chr02	30570943	30135615		Nip./ZS97	GAGAAAACCTGCGTTCGAAGGG	GGAACGTACGAGAGGGAGATGG	22	22	62.003	61.898	54.545	59.091	327
1048	LInD2-588	Chr02	30573083	30137727		Nip./ZS97	ATTGATCACGGGGAGGAGCAAT	TGGACCTCTGGAAAGACTGCAG	22	22	61.825	61.935	50	54.545	349
1049	LInD2-589	Chr02	30712756	30252415		Nip./ZS97	CGCACTGTGCTACTGCCTACTA	CCAGCGTGCATGCACTTCTTAA	22	22	62.088	62.015	54.545	50	309
1050	LInD2-590	Chr02	30834923	30379667		Nip./ZS97	TGGGACCGTCCTAATTAAAAAGGGA	TGCTTTCTGGATTCCTAAACGGT	25	23	61.762	60.245	44	43.478	332
1051	LInD2-591	Chr02	30916977	30451164	29989666	both	ATGCTCACTTCTTTGCCGCTTC	CCACCGCGGATTGCATAGTAAC	22	22	62.02	61.938	50	54.545	303
1052	LInD2-592	Chr02	31019434	30554080	30096035	both	TCCTCGACTGATTCACCCGATT	CCCCAGTTGTCATAGCCTCACA	22	22	61.211	62.007	50	54.545	310
1053	LInD2-593	Chr02	31073414	30606648	30148598	both	TCAACCATGTTTGCGACTCAGG	CTCTGGTGTGTTTCGGTTTCGG	22	22	61.385	61.938	50	54.545	350
1054	LInD2-594	Chr02	31119436	30652796	30194755	both	GACTTGTCACTTCGTGGTGTGT	CATGTGCATGTTATTAGGGCATTCC	22	25	60.994	60.795	50	44	304
1055	LInD2-595	Chr02	31122889	30656168	30198122	both	CCTCCGCTTCAGACAGTTGAGA	ACCTTTTGCTTTGAGCCAATCCA	22	23	61.977	61.514	54.545	43.478	325
1056	LInD2-596	Chr02	31137978	30671282		Nip./ZS97	GTTGTTGTCAGGTGGCCATGAG	GTGGCTCTTTGGTTTTGGATGGT	22	23	61.965	61.819	54.545	47.826	325
1057	LInD2-597	Chr02	31148680	30682071		Nip./ZS97	TTTGACTGACACGTGGATCCCA	CGCTGCTCCGTCTCATCATATG	22	22	61.87	61.236	50	54.545	348
1058	LInD2-598	Chr02	31169183	30702499	30244538	both	AATGGGACGAAGGGAGTAGCAG	GGAGGGTTCAGGAATCAGGACA	22	22	61.803	61.425	54.545	54.545	349
1059	LInD2-599	Chr02	31197203		30272552	Nip./MH63	TGCGAGATCACCCACCTCTTAC	CGATCCGACCTGTTCCTCGA	22	20	61.789	61.374	54.545	60	338
1060	LInD2-600	Chr02	31209690	30743293	30284994	both	CACCTTCTTCCAGTTGGCACAC	CAGATTCCGCCTGTAAACAGCG	22	22	61.9	62.119	54.545	54.545	329
1061	LInD2-601	Chr02	31220052	30753781	30295356	both	ATGGAGGGATGTGTAGCTCAGC	CCTTTGGAAGTCGAAACCGAGC	22	22	61.873	62.003	54.545	54.545	333
1062	LInD2-602	Chr02	31290966	30822645	30363759	both	CTCCACTCGTGTAGCGTAGTCG	GGGGTGCCTGCGCTTTTTATTA	22	22	62.415	61.785	59.091	50	339
1063	LInD2-603	Chr02	31308568		30381577	Nip./MH63	CGCGTTGATAATGTGACGACCT	CCTCTCGCATTGAAGCAGCAG	22	21	61.299	61.927	50	57.143	348
1064	LInD2-604	Chr02	31315200	30847001		Nip./ZS97	TTGCCATAAACCTGGTCCCACT	GTGTTAGCCTCAAATTCAACCCGT	22	24	61.904	61.814	50	45.833	303
1065	LInD2-605	Chr02	31319163		30392243	Nip./MH63	TCCCATTCCCATCGTATTGCCT	TGGCCGTTATTTTTGGAGAATCTCA	22	25	61.564	61.038	50	40	313
1066	LInD2-606	Chr02	31367708	30885834		Nip./ZS97	GGACAAGCCCACGGGTAAAATT	AAGCTTCAACCCAACCAGAGGT	22	22	61.405	62.098	50	50	310
1067	LInD2-607	Chr02	31374736	30889633		Nip./ZS97	TGATCCCACTGTCAACACTGCA	CTGGCAATGGTGGTGATTGTCC	22	22	62.136	62.041	50	54.545	300
1068	LInD2-608	Chr02	31416305	30917989	30464557	both	GTGCCACCTCAGTAAAAACCGG	AAGAAATCCGCGGAGGTGTGTA	22	22	61.958	61.989	54.545	50	304
1069	LInD2-609	Chr02	31428823	30930448	30477045	both	GTCGCCTTGATCCAGTGAGACT	CGCTCGTGGCCAACAAAGTAAT	22	22	62.043	62.012	54.545	50	316
1070	LInD2-610	Chr02	31459502		30507849	Nip./MH63	ATACATGCAGCAGGAGTCATCTC	AGGAAATTGATTGCCATGCCGT	23	22	60.244	61.476	47.826	45.455	316
1071	LInD2-611	Chr02	31496612		30545235	Nip./MH63	AGCCTTCCTTCTTCATCTGCCA	GCAGATGCAGCAGACAGAATCC	22	22	61.694	61.888	50	54.545	341
1072	LInD2-612	Chr02	31565853	31061604	30603987	both	TGGGGGATATTCGTGGCAATGT	ATTCCAGGCATGTTCAGCTTGC	22	22	62.092	62.045	50	50	330
1073	LInD2-613	Chr02	31651303		30685035	Nip./MH63	ATCGCCGGTGAAAGCTAAGCTA	CTTGGCGTGGTTCCAATGATCC	22	22	62.111	62.092	50	54.545	307
1074	LInD2-614	Chr02	31698069	31208795	30759578	both	CGAACCATGTAAGAGCCATGCG	TGCGTGGGGAATTCAGGTAGTT	22	22	62.183	61.947	54.545	50	340
1075	LInD2-615	Chr02	31702280	31212967		Nip./ZS97	GGGGATAAACAGGCGCAGTAGT	GGTAGAACCTCATGGAAGAAATCCT	22	25	62.383	60.104	54.545	44	310
1076	LInD2-616	Chr02	31747479	31258622	30809228	both	GAAGAGACTTGATCGCCCCA	TGTCCATTCTTACAGCCAGC	20	20	62.054	61.951	54.545	50	343
1077	LInD2-617	Chr02	31760937	31283975	30834580	both	GCTTCCAAGGTTCATAGCCGGA	ATTCCAGTGGTGGTTCTGAGCC	22	22	62.642	62.534	54.545	54.545	345
1078	LInD2-618	Chr02	31782806		30856401	Nip./MH63	ACACAGTAGTAGGCGCGTTGAT	CAGAAAAGAAAGGAAGGCGGCC	22	22	62.034	62.284	50	54.545	308
1079	LInD2-619	Chr02	31808810	31331418	30882149	both	TCGTGCTCGTGGATTCACTGAT	CAAGCAATCAGGGGTGGACAAG	22	22	62.038	61.72	50	54.545	325
1080	LInD2-620	Chr02	31813743	31335678	30887161	both	TCATTACGTGCTAGGTTTGCGC	CCGATATGTTCCTGGTCTATCGCA	22	24	61.809	62.112	50	50	343
1081	LInD2-621	Chr02	31840154	31355563	30907234	both	AGCAAGAGACAACCTTACCACACT	CGCATGTTGGTTAAGCAGTCCC	24	22	61.968	62.331	45.833	54.545	346
1082	LInD2-622	Chr02	31898330	31385099	30939920	both	ACTCACCGGTGACCAAAGTAGC	CGCCCTAGCCCATTGATAAGCA	22	22	62.497	62.774	54.545	54.545	338
1083	LInD2-623	Chr02	31899502	31386314	30941135	both	CTCCTCTCATCTTCCTCGCGAG	TTCTCTTCTCTTCTGGCAGGCC	22	22	61.951	62.002	59.091	54.545	319
1084	LInD2-624	Chr02	32033534	31513791		Nip./ZS97	TCTCTTCTCCCGTCCTCTCGAG	GGCATGGAGGAGCGAAGTTAGA	22	22	62.376	62.115	59.091	54.545	333
1085	LInD2-625	Chr02	32045266	31528363	31080323	both	CCGTTTGCTCGCATATCCTTCT	AGGCGATGCTACAGTGAACCAA	22	22	61.06	62.254	50	50	333
1086	LInD2-626	Chr02	32058624	31541731	31093726	both	AGAGAGAGCACAGTAGCACACT	TCTTTTCTTTGCGCCGTTTGGA	22	22	60.817	61.836	50	45.455	309
1087	LInD2-627	Chr02	32182610	31657191	31203645	both	GCGAAAACGAAGGGAGGTGAGT	CGGAAGGAGTAATGTCACGTGC	22	22	63.056	61.552	54.545	54.545	342
1088	LInD2-628	Chr02	32434180	31814966	31355054	both	ACTGAGAGCTAATCCGCGAGAC	GGCCACTGATAATCCAGGACGT	22	22	61.892	62.126	54.545	54.545	345
1089	LInD2-629	Chr02	32620940	32031192	31571264	both	TAAAGTTGGGAAAAGCGGCTGG	ACACGCGGCTGAATCTTTCCTC	22	22	61.657	63.423	50	54.545	300
1090	LInD2-630	Chr02	32684082	32091576	31631647	both	GAAGCCGTCATCCAAAACCACC	GAGCTTATCCGTATTGCTGCGC	22	22	62.279	62.296	54.545	54.545	303
1091	LInD2-631	Chr02	32818812	32212391	31752473	both	GAAGGACACGTGAAGGGGACTC	CACCCTGGCAAATCCACTTGTC	22	22	62.55	61.976	59.091	54.545	314
1092	LInD2-632	Chr02	32890307	32284589	31824672	both	TCCAACTCTACCCCTCCTGGAG	GGCTCACCTCGTTTTGCGTATC	22	22	62.31	62.116	59.091	54.545	348
1093	LInD2-633	Chr02	33124795	32529085	31969904	both	CAGGTAAACACAGGGAGGGAGG	TTCTGGACTTCCTGCCGTGTAG	22	22	62.009	61.983	59.091	54.545	343
1094	LInD2-634	Chr02	33401285	32881359	32322179	both	TGCCCTATTTGTTTGTCGTGGA	TGCGCTCCAGTATTCAGAGACA	22	22	60.487	61.466	45.455	50	316
1095	LInD2-635	Chr02	33446529	32926804	32367590	both	AGCTTTTTGGCCGTTGATCACC	TGTAAGCCATGATTCGAGCCAT	22	22	62.229	60.159	50	45.455	305
1096	LInD2-636	Chr02	33540566	33012719	32453507	both	GGAAGCGGCAGAAATCATGGAC	AGTGGTCAAACAGTGCAAGCAA	22	22	62.146	61.465	54.545	45.455	309
1097	LInD2-637	Chr02	33607362	33078342	32519107	both	AACGACCTATGCAACGGAGGAA	CATGGAGTGCAAGTCGACCAAC	22	22	61.989	62.006	50	54.545	315
1098	LInD2-638	Chr02	33623393		32535301	Nip./MH63	ACTCCATCATTTTCTTTACGGCTGA	TAGCTGATGCATGGAACGGAGG	25	22	60.803	62.439	40	54.545	305
1099	LInD2-639	Chr02	33644901	33114301		Nip./ZS97	TCGTAATTTGCATCAGCGGCTT	TAATCTTCTCTCGAGCACGCGT	22	22	61.513	61.823	45.455	50	331
1100	LInD2-640	Chr02	33777869	33241975		Nip./ZS97	AATGAGGCCGCGTGAAAAAGAG	AGCGAAAAGATGAGGCTAGAGGA	22	23	62.016	61.195	50	47.826	304
1101	LInD2-641	Chr02	33796940	33261229		Nip./ZS97	TCAAGAACTGCATCGTTTCGCC	AGTCAGGCAATCAGCTCCGATT	22	22	62.001	62.068	50	50	301
1102	LInD2-642	Chr02	34003844	33396486	32908244	both	GCCATGACTAATAGCAGAGCTCCT	TGCTGCGGGAAATTAAGTTGCA	24	22	62.075	61.656	50	45.455	344
1103	LInD2-643	Chr02	34069042		32979170	Nip./MH63	ATCCGTCTCGTTGCAGTCGTTA	ACACCGACAAACCAATTCCCAA	22	22	62.019	60.951	50	45.455	311
1104	LInD2-644	Chr02	34299821	33651887	33024200	both	AACCGGCAAGACCAACTCAAAC	CTCCTGGAGGCCAAACTGAGAA	22	22	61.841	61.945	50	54.545	318
1105	LInD2-645	Chr02	34396635	33748972		Nip./ZS97	ACCCAACTGCAGTGAGAGAA	CCAATGCCCATCCATTCAAGT	20	21	61.811	61.445	50	47.826	337
1106	LInD2-646	Chr02	34417976	33767801		Nip./ZS97	GCAAATGCTCCCTATATTAGGCCG	AACGGGGTGTAATCGACCTCTG	24	22	61.692	62.045	50	54.545	326
1107	LInD2-647	Chr02	34600602	33910715		Nip./ZS97	GGGAATACGCAAAAGGATTACGCA	ATGTGTTCGACAACCATTCCCG	24	22	61.978	61.448	45.833	50	342
1108	LInD2-648	Chr02	34629441	33939695		Nip./ZS97	GGCATTTGTCTGTTGTCTCCCG	TTTCACCTGGTACGATGTGGGC	22	22	62.016	62.829	54.545	54.545	322
1109	LInD2-649	Chr02	34700229	34009424	33398539	both	AGCCCGAATATAGGTTCTCCTCA	CGTAGTCACGTACAAGCGCTTG	23	22	60.438	62.079	47.826	54.545	314
1110	LInD2-650	Chr02	34900730	34176485	33575237	both	CAAGGTGTTCATGCAGAGCGAC	GCCGGAGTAGAGGTTATTGCCT	22	22	62.311	61.866	54.545	54.545	326
1111	LInD2-651	Chr02	34963169	34239944		Nip./ZS97	AACACGTTGGGCAACTTTGGAG	CCCACGACTAATTAGACCCTGGT	22	23	62.098	61.449	50	52.174	302
1112	LInD2-652	Chr02	35022102	34298064	33696358	both	TCCCCACCAAGAGCAGGTAAAG	AGACAAGTAACCGCCATTCACG	22	22	61.952	61.185	54.545	50	349
1113	LInD2-653	Chr02	35036732	34312740	33711033	both	GGTCTTTCAGCGTTACTTGAGCC	GGAAAATGGAGCAAGCGCAGAA	23	22	61.954	62.282	52.174	50	320
1114	LInD2-654	Chr02	35256158		33956618	Nip./MH63	TGCAGCCGATTTTACCTACCGA	GCCTATGAACGTAAGCACTCCC	22	22	62.051	61.059	50	54.545	319
1115	LInD2-655	Chr02	35314279	34631243	34014419	both	AGTGAGTTGGGAAAGAGGGGAA	CTCAACTGAAGCGATGGCAGTG	22	22	60.969	62.063	50	54.545	300
1116	LInD2-656	Chr02	35353027	34670247	34054684	both	GCATGCGGAGATAGAGAGGAGG	TTCTCTCAGCTACCGAACGCAA	22	22	62.036	61.968	59.091	50	307
1117	LInD2-657	Chr02	35375692	34692909	34077348	both	CGAGGATGAGGTGGAAGAGCAA	CAGCTTCCAAGTCAAGGGCAAG	22	22	62.053	61.969	54.545	54.545	314
1118	LInD2-658	Chr02	35388582	34705835		Nip./ZS97	AGCACCTGATCCGGCCTAATTT	CTAGCCAACAATGCAAGCTGCT	22	22	62.086	62.034	50	50	342
1119	LInD2-659	Chr02	35397962	34715230		Nip./ZS97	AGAACTAAGCCCAGCTCAGCTC	TTGGCCATGTTTGATCCACAGC	22	22	62.058	61.985	54.545	50	336
1120	LInD2-660	Chr02	35534911	34818384	34202349	both	TCCGTATTTTAATGCATGACACCGT	TACCGTCACCTCCATAAGCGAC	25	22	61.371	61.838	40	54.545	335
1121	LInD2-661	Chr02	35535177	34818612	34202577	both	GTCGCTTATGGAGGTGACGGTA	CTGAACCTGACATCCCCAACCT	22	22	61.838	61.956	54.545	54.545	338
1122	LInD2-662	Chr02	35589261	34872461	34270494	both	TTGCTGTATCCTCTCCATCGGT	TATGCCCATCCCTGTTGCTTCA	22	22	60.955	62.028	50	50	323
1123	LInD2-663	Chr02	35611104	34889599	34287630	both	TATGACTATGGCCCTCCTGGTG	GTGGCTAAAGACCCACTACCCC	22	22	61.027	62.33	54.545	59.091	340
1124	LInD2-664	Chr02	35672822		34349288	Nip./MH63	GATGCAGAGAGAGAGGCGGTTT	ACGATCGCAGGAGGCATAGAAG	22	22	62.367	62.223	54.545	54.545	348
1125	LInD2-665	Chr02	35715612	35000082		Nip./ZS97	AGCTGCGGGTAAACCTTTTATTCA	GCACAGTGTACAAGGCATAGCA	24	22	61.05	61.193	41.667	50	305
1126	LInD2-666	Chr02	35754280	35030749	34427000	both	CTTTCATAGGCACGCGCATTGT	TGGTCAACTCATGCATCGGTCT	22	22	62.383	61.997	50	50	347
1127	LInD2-667	Chr02	35808485		34481347	Nip./MH63	AAGCTGACCCATAGAAGCCACA	GCTGAGAACTCTGCCATCTGAA	22	22	61.69	60.355	50	50	332
1128	LInD2-668	Chr02	35826894		34499789	Nip./MH63	CTGCATTGGTCTTAGCTGCTGG	ACATTTGCAGGTGCTCCCAAAG	22	22	61.833	61.924	54.545	50	326
1129	LInD2-669	Chr02	35852660	35129733		Nip./ZS97	TCGCCACGTGGTTTCCTTTTTC	ATACGCACGGATCTCTCCCTTC	22	22	62.144	61.653	50	54.545	326
1130	LInD3-184	Chr03	248222		80181	Nip./MH63	AATCTCCTCGTTGTCGCCTCAA	GTGTTGCCCCTGATTGAAGGTG	22	22	61.983	61.976	50	54.545	338
1131	LInD3-185	Chr03	263870	202628	110816	both	GCTGGGCTGATGCTGAGAGATA	TAGGACCCCTTTGTTCACGCTC	22	22	61.929	62.25	54.545	54.545	303
1132	LInD3-186	Chr03	449772	344624	275882	both	AGTACAGTGGAGATCGATCGCC	GTTTGCACGCGTGGATAGTCTC	22	22	61.645	62.105	54.545	54.545	323
1133	LInD3-187	Chr03	495496		334852	Nip./MH63	AGCAGTCAGTGTCAAAGCATGC	ACCACTAGATGAATGAAGGCTAGGT	22	25	61.959	61.111	50	44	311
1134	LInD3-188	Chr03	518366	415324	356636	both	TGCACTACTACCTTTAGCCCTTGT	AAGCAAGCTGTACGTAGCAAGC	24	22	61.548	61.753	45.833	50	335
1135	LInD3-189	Chr03	536557		375025	Nip./MH63	TGCTTTGCTTGCCCAATGTCAT	TGTCTGCTACGACAACCTAGCT	22	22	61.933	61.14	45.455	50	330
1136	LInD3-190	Chr03	547673		386191	Nip./MH63	CTCCGCTGTACCTAGAGTGTGG	GAATTCCACGTAAGCCAACCGG	22	22	61.836	62.073	59.091	54.545	319
1137	LInD3-191	Chr03	615497	514143		Nip./ZS97	TGTGGAATTCATGCTGTAAGTTGTG	CAATGGGGTATCCTCCTATAGTCGT	25	25	60.278	61.045	40	48	344
1138	LInD3-192	Chr03	715506	603925	545315	both	ATTCTCTTTCGGTCTGTGGGGT	TGGCTTTCTCTTGGATATCACCCT	22	24	61.358	61.377	50	45.833	313
1139	LInD3-193	Chr03	815544	705528	646460	both	TCGCGTTCGACTCTTCAGAACA	ACGGACGGTGTCAAGACAAAGA	22	22	62.198	62.106	50	50	321
1140	LInD3-194	Chr03	890150	782147	723074	both	ACATCGTGGTGTCAAAAACGTAGA	CGCGGGCTACCTTCCTAGTTTA	24	22	60.975	61.848	41.667	54.545	346
1141	LInD3-195	Chr03	953120	842742	783673	both	GCCAGGTACAAGTAGCCATTGC	CGTAGCAGCGCTTGATTCTACG	22	22	61.835	61.962	54.545	54.545	338
1142	LInD3-196	Chr03	995675	879427	820363	both	CGTGCGGCCTATGAATGGAT	CAACACGCACAGCAAAAGCTT	20	21	62.006	61.911	54.545	50	337
1143	LInD3-197	Chr03	1479192	1376991	1103805	both	AGGAAGCCTTTGCAGCAGTCAT	TGGTCGACCAAATCTTTCGGC	22	21	62.801	61.211	50	52.381	300
1144	LInD3-198	Chr03	1497363	1393810	1120624	both	ATACAATGGAAGGCCGCTTTGC	AGGAGGGGATGACATTGTGACA	22	22	62.103	61.099	50	50	311
1145	LInD3-199	Chr03	1512480	1406935	1133748	both	ACATGAGCATGGAGGAGAACCC	GGCAACAGTCAACAGGCATCTG	22	22	62.08	62.275	54.545	54.545	313
1146	LInD3-200	Chr03	1547854		1203954	Nip./MH63	CCTCACAGAGGCTCACAGCTTC	AGTAGCTCCAAGCCTCCAAAGG	22	22	62.868	62.013	59.091	54.545	300
1147	LInD3-201	Chr03	1639216	1574166	1301011	both	AGTGGTCAAACGTTGCAAGCAA	GTGTGGTAATTGTGCTACTGTGCA	22	24	62.032	61.805	45.455	45.833	301
1148	LInD3-202	Chr03	1693761	1632570		Nip./ZS97	AGACGGAGGGAAAACTCAACCT	AACGGATCAGGTCGATAGCTCC	22	22	61.291	61.653	50	54.545	322
1149	LInD3-203	Chr03	1696252		1358172	Nip./MH63	GAGTAGAGGGGTGGAGGAGGAA	GGGGACCGAGGATCTTTAGTGC	22	22	62.043	62.437	59.091	59.091	322
1150	LInD3-204	Chr03	1852140		1517766	Nip./MH63	TGTGTGTGTTTTCTCTGATTTCAGC	CACACCCATGAGTACGTTCCCA	25	22	60.449	62.249	40	54.545	335
1151	LInD3-205	Chr03	1904499	1862176	1568095	both	CCTCAACTCACCACATCGGAGA	TGTGTTGATCTGTGAGGGCAGT	22	22	61.727	61.878	54.545	50	328
1152	LInD3-206	Chr03	1988648		1666044	Nip./MH63	CCGTCTCGCAAATTAGTCGCAA	CAGCGTGGTGTTTGCTCGTATT	22	22	61.8	62.001	50	50	349
1153	LInD3-207	Chr03	2041530	2029690	1733314	both	ATTGCCTGAGATAGTGCCTGCA	CTCAAGCTCACCCACCTCCTAC	22	22	62.078	62.054	50	59.091	349
1154	LInD3-208	Chr03	2044271		1736003	Nip./MH63	AGATCTGTAGCCAGCTGCAACA	CTCTCCAGCAACCGATCGATCT	22	22	62.001	61.905	50	54.545	316
1155	LInD3-209	Chr03	2118425	2107111	1810800	both	TCACTTCTACTAAACTGCGTACGC	TCGTCAAAACTCAAAACGCGGG	24	22	60.904	62.432	45.833	50	301
1156	LInD3-210	Chr03	2135301	2123983	1827674	both	CCAAATTCCACCAAGCTGGGAA	GCGCTGCACCTTACAATTAGCA	22	22	61.35	62.076	50	50	311
1157	LInD3-211	Chr03	2135673	2124321	1828012	both	TGGGAGAAGCAGCGTGGTTTAA	TTTGGTAAGTAGCCCGTGCAGA	22	22	62.455	61.933	50	50	304
1158	LInD3-212	Chr03	2346154		2030426	Nip./MH63	AGGCTTCAGCTCCAACTTCACT	GGTGGCTTTGATCTCTGTTCTCC	22	23	61.883	61.178	50	52.174	347
1159	LInD3-213	Chr03	2407801		2084544	Nip./MH63	GGATGGATTTCACGGCCTCTCA	CGAGAGAGATGAGAGGGGCATG	22	22	62.387	61.974	54.545	59.091	323
1160	LInD3-214	Chr03	2473071	2429676	2141934	both	GCGTGTCTCTATTGGTTGTGGG	TCCAAAAGGAGGTGTCACTCGT	22	22	61.506	61.545	54.545	50	329
1161	LInD3-215	Chr03	2491822	2451334		Nip./ZS97	AAACACACCCTGATTCATGAGCT	GACTTCCAATGACCCAACCGTG	23	22	60.499	61.705	43.478	54.545	342
1162	LInD3-216	Chr03	2568243		2237417	Nip./MH63	ACGTGCTCGAGATCTGATCCAA	CCCATCACATGCAAGGCGAAG	22	21	61.524	62.209	50	57.143	348
1163	LInD3-217	Chr03	2584000	2556796		Nip./ZS97	GCTATGAAGCGTTTTGTGCTACA	GAACGGGGCCTTTGTTCTGATT	23	22	60.12	61.4	43.478	50	335
1164	LInD3-218	Chr03	2654968	2611242	2320412	both	CCTTCGCACACTTCACCAAACT	GTGAGCAACCCAAAACCGAAGT	22	22	61.578	61.841	50	50	312
1165	LInD3-219	Chr03	2695196		2358615	Nip./MH63	TCGTTTGCGATCAAATCTGGGC	ACGGCAATAAGTCTTTGGCAGC	22	22	62.076	62.027	50	50	335
1166	LInD3-220	Chr03	2860157	2822618	2531121	both	GGGGATGGAAACGTGTGAGAGA	GGATAAAATCGCATCTCCGCCG	22	22	61.993	62.056	54.545	54.545	346
1167	LInD3-221	Chr03	2875736	2838147		Nip./ZS97	GGTGGTTCTCTAGGCCTTTCGT	GGAGAGAGAAAGATAGCGGGCT	22	22	61.995	61.341	54.545	54.545	300
1168	LInD3-222	Chr03	2923752	2892171	2600684	both	GCTCTGCCTTACCCTCTTCCTC	CAGATGCAAAGAGGAGCGCTG	22	21	62.121	61.927	59.091	57.143	313
1169	LInD3-223	Chr03	3021937	2989107	2697478	both	AACATTGGCATCTACAGCGCTG	CCATGTTCGTCACCAACACCAG	22	22	61.829	61.951	50	54.545	310
1170	LInD3-224	Chr03	3083702	3042707	2751104	both	CTGGAACCTCACCTCACCAGAG	CGAGCAGCCGACATGTTCTT	22	20	61.991	62.006	59.091	50	309
1171	LInD3-225	Chr03	3200713	3147041	2855433	both	TCTCCCATCTTCATTCATGTCTCCA	CTCACTCCGCACTCGTAAAGGA	25	22	61.346	62.024	44	54.545	348
1172	LInD3-226	Chr03	3225042		2879284	Nip./MH63	AGTCAAACTTCCAATTTTAGCGTGG	TGTTACCATAGCATCGTCGTTCA	25	23	60.507	60.119	40	43.478	314
1173	LInD3-227	Chr03	3248362	3194654	2902980	both	CGATTTGTGGACTGGGGGTTTG	GTGGTGGACTAGACGACCCTTC	22	22	61.971	62.035	54.545	59.091	341
1174	LInD3-228	Chr03	3347039	3273766		Nip./ZS97	TAAATGGGGTTAGAAGGGCCCG	GGTGGGGCTTTCTAAAAGCTGC	22	22	62.089	62.296	54.545	54.545	312
1175	LInD3-229	Chr03	3372488	3311755	3043046	both	TGTGCCCATGTGTTTGTCAAGA	TGTTGGACAAAACACAGGAGCT	22	22	60.948	60.62	45.455	45.455	329
1176	LInD3-230	Chr03	3387743	3327024	3058358	both	GCAAGTTGACTGCGGTTTCCTC	TCCTCCCTCAACCGAAAAACCG	22	22	62.508	62.763	54.545	54.545	300
1177	LInD3-231	Chr03	3433390	3368706	3100063	both	ACACCCGTGACCAACTCATGAT	CACAGGGATGGGCGAACTATCT	22	22	61.941	61.869	50	54.545	320
1178	LInD3-232	Chr03	3456803	3392794	3124134	both	TTAGCTAGCCTGCTACGTTGCA	GCAACCTGCACAGTAACTTCAAC	22	23	62.044	60.792	50	47.826	335
1179	LInD3-233	Chr03	3457608		3124884	Nip./MH63	TGCACGTTACATGCCAGACAAC	ACTCCACAAACATGCGAAACCA	22	22	61.947	61.268	50	45.455	330
1180	LInD3-234	Chr03	3459932	3395995		Nip./ZS97	AGTCAACCGTTGGACATGAATCT	GTCCGTACGGTCCTACATAGGC	23	22	60.245	61.956	43.478	59.091	344
1181	LInD3-235	Chr03	3474382	3415056	3135285	both	TCCGATCGTACCCCTGCAAAAT	AGTCATACGCACGCAGTCAGTA	22	22	62.066	61.767	50	50	338
1182	LInD3-236	Chr03	3533865	3474742	3194919	both	AAATTTCACCCGTGGACGCTTG	ACGTGCTAAAAAGTCAACGGTGT	22	23	62.213	61.477	50	43.478	330
1183	LInD3-237	Chr03	3818097	3748311	3472019	both	TTCAAGGAGGGCTAGATGCAGG	GCAGCTGTTGTTAAATGAAGAAAGC	22	25	61.815	60.108	54.545	40	313
1184	LInD3-238	Chr03	3823184	3753353	3477061	both	AAAACATCTGCACTGACAGCCG	TTTCTCTCGTCTCGGCGGAATT	22	22	61.955	62.034	50	50	340
1185	LInD3-239	Chr03	4021062	3904709	3628411	both	GCCCACAAATACCAAGCAGACC	GGATGGAGAGAGAGTGATGCGG	22	22	62.038	62.228	54.545	59.091	303
1186	LInD3-240	Chr03	4270109	4144336	3867869	both	GCACACACATTCAATGAGCCGA	TCCTCGCCAGATCGATGAACTC	22	22	62.015	61.901	50	54.545	320
1187	LInD3-241	Chr03	4286478	4160687	3884221	both	TCTACCAAATGCTCCCTACGCC	CGCTTTGTTTTAGTGGAGGCCA	22	22	62.122	61.648	54.545	50	314
1188	LInD3-242	Chr03	4315201	4179361	3902893	both	TCGGGTTGTTGCACCATAGTCA	TGAGAAGCTTAGCTGCTTGCCT	22	22	62.194	62.263	50	50	313
1189	LInD3-243	Chr03	4343487		3931186	Nip./MH63	ACGCTCGAGCAATCACATACGA	ACGAATACGGACATGCTTCCTGT	22	23	62.391	62.241	50	47.826	346
1190	LInD3-244	Chr03	4370706	4234851	3958375	both	CACGAACCAAACAGGCCCTTAC	GCAAGAGCCAGCCAACTTCAAA	22	22	61.958	62.168	54.545	50	335
1191	LInD3-245	Chr03	4390880	4264229	3987760	both	GGCAACAACTAAATGTAGCCACTT	TTGGGACCATGCCAAGCCCTAG	24	22	60.022	64.612	41.667	59.091	347
1192	LInD3-246	Chr03	4391147	4264461	3987992	both	CCTTTCCCATCCTCTCAAAACACT	GATGAATCTGCAGCCAGGCAC	24	21	60.751	61.948	45.833	57.143	350
1193	LInD3-247	Chr03	4411054	4284661	4008193	both	TTGGGGAAATGCCTTGAACAGA	TCAGACATCACTTCATACTTCCCG	22	24	60.426	60.142	45.455	45.833	303
1194	LInD3-248	Chr03	4415104	4288756	4012288	both	ACCTGTCTTGTTACTGCCTCCC	ACTTCTTGGGTGTGGTAGGTGT	22	22	61.942	61.23	54.545	50	311
1195	LInD3-249	Chr03	4449726	4323536	4047066	both	GTGGGACTGGGAGAATAGCCAG	CCCGATTTGTAGGCGCTTCAC	22	21	62.131	61.926	59.091	57.143	341
1196	LInD3-250	Chr03	4523108	4391557	4115107	both	AGAGGTCGTTTCGTTTGACAGC	TGTCGTAACATGAGGGTACGTACT	22	24	61.37	61.103	50	45.833	300
1197	LInD3-251	Chr03	4613606	4500126	4223903	both	GATGGAGCAATTGGTTAGTTGAACG	TCAGTGGTTTTTCAAACTGATGCCA	25	25	60.9	61.848	44	40	300
1198	LInD3-252	Chr03	4628306	4515223	4239000	both	AAGGAAAGCGACGGGTGATACA	ACAAGCGACACGTACAGGTCAT	22	22	61.989	62.226	50	50	309
1199	LInD3-253	Chr03	4640819	4527936	4251955	both	CCGCCTTGATTTCACTGCACT	GACCCATCAGTCCATCACACCA	21	22	61.965	62.007	50	54.545	350
1200	LInD3-254	Chr03	4693996	4578614	4302538	both	TGCCAACTACTCTTCTCTCCTCC	GCAAACCTATCGGAGCAGAAGC	23	22	61.131	61.882	52.174	54.545	302
1201	LInD3-255	Chr03	4724332	4609229	4333150	both	TCTCAATCTAACGCTGCAGGCT	CGGTGGTGCTACCTCATAATCCT	22	23	62.053	61.82	50	52.174	311
1202	LInD3-256	Chr03	4729245		4338024	Nip./MH63	GCTGTCCGCTGTAGCAAATGT	AGCGAGCACCTGGTTTTGTT	21	20	61.25	61.788	50	45.455	310
1203	LInD3-257	Chr03	4889803	4811067		Nip./ZS97	AGTGGGGAGAGGGAGATGACAT	CACCGAATCCGATTCTCGTCCT	22	22	62.062	62.154	54.545	54.545	321
1204	LInD3-258	Chr03	4920922	4842353	4567560	both	AGGACGGAGGGAGTATATGCAA	TCCTCGCTGAGTCGTCTCCTAT	22	22	60.426	62.128	50	54.545	311
1205	LInD3-259	Chr03	5031808	4971347		Nip./ZS97	ACGTGAACCTCATCGTTGACCA	TAGGGATGAGTGTACGGCGTTG	22	22	62.171	62.095	50	54.545	330
1206	LInD3-260	Chr03	5102749	5046008	4770868	both	ACCTCAGCGATGGTGCATCTAG	GCGGACAAATCCCATTTTCCGT	22	22	62.174	62.033	54.545	50	344
1207	LInD3-261	Chr03	5139768	5085454	4810303	both	GCTGCAAGACTCCATCAGTGGT	AGAATCTCATCGGTTGCCCACA	22	22	62.832	62.007	54.545	50	347
1208	LInD3-262	Chr03	5237214	5203134	4927928	both	AGTGGAAGACATGTGACGGTCA	CCTGAAAGATCCACCGGTCAGA	22	22	61.603	61.736	50	54.545	316
1209	LInD3-263	Chr03	5338265	5302369	5027168	both	CGAACAGGGGCAACATCAGAAC	AGGCGTAGGAGTGAAGTGAAGC	22	22	62.016	62.297	54.545	54.545	303
1210	LInD3-264	Chr03	5359227	5323237		Nip./ZS97	CGTTGCAAAGAGAAAGAAATGGCG	CACCGGGTTGAAAGAAATCCCT	24	22	61.88	60.818	45.833	50	350
1211	LInD3-265	Chr03	5432791	5405532	5130369	both	CATAGGCCGCCACTTAGGATGA	GAGGCGGAAAGAAACAACGAGG	22	22	61.931	62.003	54.545	54.545	317
1212	LInD3-266	Chr03	5434587	5407295	5132132	both	GCCGCATTCAACGCCGATATAT	CGAACGGCCTAAAAATTGCAGC	22	22	61.813	61.543	50	50	303
1213	LInD3-267	Chr03	5503268	5479130	5203941	both	TCGTCGCATGTGTTCACCTCTC	ACGGACTTGTGAATAGGTGTACCA	22	24	62.834	61.538	54.545	45.833	349
1214	LInD3-268	Chr03	5552541	5528021	5252517	both	AGCGCAGGAATTAGACAGGAGT	TCCATGTCAACCCAATGAGGCA	22	22	61.477	62.226	50	50	337
1215	LInD3-269	Chr03	5665116	5638973	5363438	both	GACCGTGTGTGTCTCGCATAAC	ACCGGGACTACAAAAGGTTACCA	22	23	61.792	61.522	54.545	47.826	334
1216	LInD3-270	Chr03	5699634	5673030	5397495	both	ATCGTGGGACGGAAAGAGTAGC	ACCCGCGTATTGAATTGCTTCC	22	22	62.1	61.832	54.545	50	350
1217	LInD3-271	Chr03	5750754	5723991	5448461	both	GGTTGATTGCATATGAAGTACCCCA	CTTTCACACTGCCATGAGGACC	25	22	61.155	61.454	44	54.545	320
1218	LInD3-272	Chr03	5806369		5503791	Nip./MH63	CACCGCCACTATGTTCATTCGA	GCTTTGTGACTGACTTCGTGCA	22	22	60.993	61.877	50	50	349
1219	LInD3-273	Chr03	5808002	5783862	5505463	both	CGCACGACTTCCCTTTCTTTCC	ATAGCCCAAAAACCACATCGCG	22	22	62.003	62.087	54.545	50	338
1220	LInD3-274	Chr03	5813787		5511301	Nip./MH63	ATCACGCGAAATCAACGGCTAG	GGAACTGCTAGCTGACTGTCGA	22	22	61.615	62.028	50	54.545	349
1221	LInD3-275	Chr03	5864435		5560984	Nip./MH63	GCCTGTGACAGTTTGTGTTGCT	GGAGAGTGTCCTAACGGTGCAA	22	22	62.092	62.238	50	54.545	314
1222	LInD3-276	Chr03	5882078	5859284		Nip./ZS97	TACTCTGGTCACCAAGCCTCCT	GAAACGATCGGAACCACCTCCA	22	22	62.509	62.557	54.545	54.545	343
1223	LInD3-277	Chr03	5895612	5873059		Nip./ZS97	TTAAAGCGTCGTCTCGAGAGCT	TTTTGGCGATGACCTGGTCTCT	22	22	61.759	61.941	50	50	332
1224	LInD3-278	Chr03	5903566	5880990		Nip./ZS97	CCTCTCCTGTCTGTCACAAGCA	ACGTGATTGGCTCTCGATCGAT	22	22	61.925	61.901	54.545	50	327
1225	LInD3-279	Chr03	5959909		5666980	Nip./MH63	TCTCGCTCGTGAGTTACCAACA	CTCGTTTCTCGCCCCTGCTATA	22	22	61.645	61.907	50	54.545	310
1226	LInD3-280	Chr03	6083907	6070660	5801549	both	AATTGGACGAGGGAAAGGCTGA	AGAGAGGCTCACACGCTTTTCA	22	22	61.952	62.181	50	50	328
1227	LInD3-281	Chr03	6085621	6072325	5803214	both	GTAACCGTAGAAGGCGCAAACC	GAGAGGCTGTTGATGCGGATGA	22	22	62.059	62.684	54.545	54.545	309
1228	LInD3-282	Chr03	6097900	6084669	5815552	both	CAGCCTTTCACTCCGAGTACCA	GACCAGGCACATGAGAAATGGC	22	22	61.983	62.096	54.545	54.545	302
1229	LInD3-283	Chr03	6457598	6423293	6148855	both	GTGTAAGCTGCCGTGTTGTCTC	GTTGCACTTTGAGCTAGCGTGT	22	22	61.992	61.942	54.545	50	337
1230	LInD3-284	Chr03	6511415	6474565	6200558	both	TCTATTGAGATAGTAGTAGCGCGGT	TGAATGTTGCATGTAGTGGGCC	25	22	60.799	61.465	44	50	300
1231	LInD3-285	Chr03	6518865	6481536	6207529	both	TCCAAGTGCTCGTTACTTCTCCC	TCCAGACCCACTAGCTCGGATA	23	22	62.179	61.828	52.174	54.545	300
1232	LInD3-286	Chr03	6543848	6505411	6231406	both	GCTTCTCCATCCTGACCATTCCT	ACCACAGGATCCTGAAAATCCCC	23	23	62.026	62.233	52.174	52.174	324
1233	LInD3-287	Chr03	6594545		6278219	Nip./MH63	CATGCTGGCCTAAAGGAACGC	CCTCCCCACTAGTACGTTCGTG	21	22	62.206	62.085	57.143	59.091	318
1234	LInD3-288	Chr03	6656835	6599727	6325769	both	TGCTGGTTAGAGAGTTACGGGC	ACTCGTACGATTCCCTTGGCAT	22	22	62.045	61.799	54.545	50	325
1235	LInD3-289	Chr03	6737085	6675426		Nip./ZS97	GCAGGAGACCTAACTTGCCCAT	TGGCAGGATGTGGATGTGAGAA	22	22	62.338	61.689	54.545	50	313
1236	LInD3-290	Chr03	6765688	6695678	6421761	both	TCGCAGAAACCTAGGACATCGG	ACCATTCCTCTCGCAATGTCGA	22	22	62.099	62.048	54.545	50	348
1237	LInD3-291	Chr03	6802073	6732129	6458217	both	GGGTACGAGTAGACCTTTGCGT	ACTCTCGTGTCATGCCACACTT	22	22	62.031	62.181	54.545	50	345
1238	LInD3-292	Chr03	6802380		6458478	Nip./MH63	TCGATTGGATGTAGATGCCGGG	GAAATGCATCCCGGTGGAACTC	22	22	62.241	61.835	54.545	54.545	319
1239	LInD3-293	Chr03	6812475	6743579	6469644	both	TGGCAGCCCACTACAAGTCTAC	GCGCCTCACCTTCACTAGTGTA	22	22	61.993	62.034	54.545	54.545	320
1240	LInD3-294	Chr03	6853053	6782678	6508724	both	CCCAACAGTTGCATGCTAGTCG	GCCATTGCTCACCACACAAGAA	22	22	62.07	61.909	54.545	50	349
1241	LInD3-295	Chr03	7067584	7025774	6751811	both	TGCGCAAATGGTGAACTAGCAG	ACGGAATTGTTGCCACCAATCC	22	22	62.015	61.982	50	50	300
1242	LInD3-296	Chr03	7075252	7033472	6759510	both	CGGTTGTTGATGGGTTCCTTCG	TCCCCTTCTGATCAAGCAGCTC	22	22	62.012	62.068	54.545	54.545	314
1243	LInD3-297	Chr03	7168812	7110868	6836605	both	CAACGAAGGAACATGCATGCGA	ATCCCCACTCTACAAAGCGCAA	22	22	62.317	62.266	50	50	304
1244	LInD3-298	Chr03	7625134	7484768	7292842	both	CAGAGCGCTTGTAGGAGATCGA	GCCTTGTGTGTCGTTGTTCTCC	22	22	61.891	62.191	54.545	54.545	305
1245	LInD3-299	Chr03	7666707	7526489	7334614	both	TTTGGCTCCGTTCGGTATCACT	GCTCAACCGTAAAACCAGGCAA	22	22	61.989	61.902	50	50	329
1246	LInD3-300	Chr03	7669496	7529255	7337379	both	CCACACCATCTGCATTCACCAC	CCACTAGGCACGAACACTAGCT	22	22	62.03	62.039	54.545	54.545	349
1247	LInD3-301	Chr03	7839341	7782517	7561134	both	ACCTCGCTCGCAAGTATACCTC	GAGCCTACTGCCACATGTACCA	22	22	61.898	62.059	54.545	54.545	334
1248	LInD3-302	Chr03	7893769	7835875	7614493	both	TGTGAGAAAAAGTCAACGGCGT	CGGAGGGAGTATAGAGCTTTTCCC	22	24	61.253	62.068	45.455	54.167	348
1249	LInD3-303	Chr03	7950878	7967699	7763875	both	GGCGGCAGATTAGGGTTAGGTT	GTTTGGGGGCATATTCCATCGC	22	22	62.396	62.229	54.545	54.545	311
1250	LInD3-304	Chr03	7997499	8015094	7811277	both	ACTTCCCTCCAACCAAGTCCAA	AAGAGCGACAACGATATGCTGC	22	22	61.505	61.619	50	50	322
1251	LInD3-305	Chr03	8046740	8077961	7873976	both	GCTTATGCCTTGCACATCGGAT	AACAAGCGCCATAACACGTCTG	22	22	61.646	62.001	50	50	327
1252	LInD3-306	Chr03	8090804	8126653	7918497	both	ACGATGCACTCCTCCTCTTTCC	AGGACGATTCACAGCCCTTCAA	22	22	62.054	61.941	54.545	50	312
1253	LInD3-307	Chr03	8095997	8131840	7923684	both	TCCATCTCGACACATGCGTATGA	GAGGTCGAGCAAGGAGAGGTAC	23	22	61.797	61.837	47.826	59.091	346
1254	LInD3-308	Chr03	8135207	8170861	7962875	both	CAGGGCCCATTTGTCATTCACC	TGAAGATGCTCGGGCCATACAA	22	22	62.052	62.069	54.545	50	339
1255	LInD3-309	Chr03	8149014	8179122	7971363	both	TGAGCTCCGCTACCTGAATTTGA	AAGAGGAGTTCTCCAGCATGCA	23	22	61.942	61.685	47.826	50	336
1256	LInD3-310	Chr03	8151536	8181741		Nip./ZS97	TAGGCCAAAAGAATAGCGTGCG	GAGCCCAGAAAAGCCTCTTTGG	22	22	61.567	61.721	50	54.545	311
1257	LInD3-311	Chr03	8156879	8187048	7979191	both	AAGAACTAGGGCTGGGAAGCAG	ACACACCCTTAGTTCACGCCAA	22	22	62.013	62.389	54.545	50	336
1258	LInD3-312	Chr03	8157403	8187525	7979668	both	CTAAACGGGCCCTAAACACACC	GGAGCATAGCGAAATGGAACCC	22	22	61.453	61.644	54.545	54.545	350
1259	LInD3-313	Chr03	8177622	8209235	8000671	both	TGCCAACGCTTGAGGTTTTCTC	GCAGTTTTGCCACAAAGCCTGT	22	22	61.896	62.934	50	50	338
1260	LInD3-314	Chr03	8212405	8244035	8035443	both	CTTGGACAGTGGGGGTGGATAC	AAACTCAACGACCAGACCCACA	22	22	62.333	62.066	59.091	50	346
1261	LInD3-315	Chr03	8243947	8271655		Nip./ZS97	GCCGATGGGTGTGCCTCTATAT	GTTGAGGGGAGCTTCTCTCGTT	22	22	61.998	61.988	54.545	54.545	313
1262	LInD3-316	Chr03	8331895		8138437	Nip./MH63	GAGAGCGCGAAGGAGAAGAAGA	TAGCACGCGTCACCAACAAATG	22	22	62.083	62.249	54.545	50	350
1263	LInD3-317	Chr03	8455520	8520226		Nip./ZS97	CATCATGGATCAGAGGGGCAGT	GGATCGGTCTTCACAGCTCCTT	22	22	61.886	62.054	54.545	54.545	327
1264	LInD3-318	Chr03	8564288		8344721	Nip./MH63	TGAAGATGACGGATAAGTATGTGCA	AACGTGGTGAAAAGGCTGGATT	25	22	60.163	61.015	40	45.455	340
1265	LInD3-319	Chr03	8583294	8625084	8364039	both	GCCCTGAGCACATCATATCAATTGG	TCGCATCAACCAGGAGTATGAGT	25	23	62.287	61.444	48	47.826	332
1266	LInD3-320	Chr03	8603615	8646143	8384717	both	ACGCTTCTTGCAAACGACACAT	AGCAATATTCGAGCACACAGGC	22	22	61.886	61.573	45.455	50	347
1267	LInD3-321	Chr03	8608221	8650726	8389299	both	AACTGGTAGTGGCGGAACCT	GGCCTGTTCACTTTGATGCCAT	20	22	62.145	61.729	50	50	343
1268	LInD3-322	Chr03	8629044	8663807		Nip./ZS97	CGTGCAGGAATCCACAAAGACC	CTGGGAAGAGGAATACCACGCA	22	22	62.016	62.059	54.545	54.545	347
1269	LInD3-323	Chr03	8676729		8449748	Nip./MH63	TCGCGTCCTTAGGCAGTGTTAT	CTCCCTCCGTCCCAAAAGAAGT	22	22	61.786	61.942	50	54.545	334
1270	LInD3-324	Chr03	8696059	8730839	8470355	both	ATCTGTTAGTTAGTGCGAGGGC	TCCCCCAAATTTTTGCCACAGA	22	22	60.159	60.962	50	45.455	349
1271	LInD3-325	Chr03	8773038		8547545	Nip./MH63	CCATCCTCGACGCAATTTGGAG	ATGCCATTCCTGAGTCCCATCC	22	22	61.881	62.158	54.545	54.545	337
1272	LInD3-326	Chr03	8983263		8771228	Nip./MH63	TGTTGTTACGTGCAACTTGGCA	TGTATCCCCAGGAAACGGACAC	22	22	61.771	62	45.455	54.545	347
1273	LInD3-327	Chr03	8994440		8782602	Nip./MH63	TCGAGGCAATAAGAGCAGGAGG	CAGAGGATAGCCACCCACACTT	22	22	61.859	61.749	54.545	54.545	325
1274	LInD3-328	Chr03	9160495		9015985	Nip./MH63	ATATGGCGCATGATGCAATCCC	TGCGAGACAAATCTTTTGAGCCA	22	23	61.786	61.303	50	43.478	349
1275	LInD3-329	Chr03	9239979		9083895	Nip./MH63	TCTGTTGTACTCCTTTCGTCCCA	ATTCACCGGCCAATACGTACGA	23	22	61.257	62.102	47.826	50	312
1276	LInD3-330	Chr03	9303195		9147672	Nip./MH63	TACGCCACTAGCAGAGCCATAC	AAGCAGGATTGGTGGTGGTGTA	22	22	61.907	61.894	54.545	50	339
1277	LInD3-331	Chr03	9316533		9162222	Nip./MH63	GCGAGATCGATCCAAGCGAAAG	GAAAACAGCAAGGCACCAAACG	22	22	61.976	61.615	54.545	50	322
1278	LInD3-332	Chr03	9366130	9420956		Nip./ZS97	TGTCAGCGAATCCGGTTATAATGC	CGAGGAATGGAGGAACCCGTAA	24	22	61.561	61.795	45.833	54.545	348
1279	LInD3-333	Chr03	9389970	9444050		Nip./ZS97	CTCGAACCGCATAGAAGTTGCT	ACAAACTACTCCCTCCGTCGAA	22	22	60.991	61.077	50	50	341
1280	LInD3-334	Chr03	9438869	9497074		Nip./ZS97	CATTTCAGATGTCACCCAGCCC	AGCTCCAACTCTCTTGGCAAGT	22	22	61.527	61.883	54.545	50	318
1281	LInD3-335	Chr03	9464399	9521974		Nip./ZS97	TCCCGACAGGTATACTCGGTCT	TTAGCATGGCTAAATCGCTGCG	22	22	61.815	61.941	54.545	50	311
1282	LInD3-336	Chr03	9519274	9583189		Nip./ZS97	ATGGGCAGAGAAACAGAGCCTT	GGTGGTTCCTTTGTTCATCTGTCG	22	24	61.96	62.092	50	50	332
1283	LInD3-337	Chr03	9799324	9882398	9645550	both	GGCACAACAATACAGCCATGGG	TACAGGTTGGCTGGTGCTACTC	22	22	62.36	61.993	54.545	54.545	308
1284	LInD3-338	Chr03	9858337	9940954	9704109	both	ACACACACACACACACACACAC	TGGGAGGAAGAAGAGTTGGC	22	20	61.947	61.945	50	54.545	318
1285	LInD3-339	Chr03	9881085	9963649		Nip./ZS97	CGGAAACAGGAGAGCTGCTACT	TGCTACCATGCTAATGACGGTT	22	22	62.043	60.093	54.545	45.455	350
1286	LInD3-340	Chr03	9942273	10024707	9787881	both	CCAAACCAGCACGAAACCTCAT	GTTCCTTTCGCAGCTTCTCTCG	22	22	61.651	61.799	50	54.545	348
1287	LInD3-341	Chr03	9949921	10032324	9795500	both	TCTCCCCGGTCAAATCCTTGTC	TCTTCCTTACCCTCTCCCACCA	22	22	62.004	61.927	54.545	54.545	302
1288	LInD3-342	Chr03	9964530	10050391	9813572	both	GAACGGTGGGACTCATCTGTCA	AACTTGGGATAGCCGAGGATGG	22	22	61.983	61.879	54.545	54.545	305
1289	LInD3-343	Chr03	10049736	10141738	9902584	both	AGGTGGTTGTGTGTTTTATGACAGA	ACGCACATGTCAGTTGTTGTCC	25	22	60.864	61.886	40	50	349
1290	LInD3-344	Chr03	10051770	10143719	9904560	both	CCCGTCGCACACCAAGTTAATT	CGCGCGAGTTGCAACTAATACT	22	22	61.702	61.855	50	50	323
1291	LInD3-345	Chr03	10060489	10152421	9913291	both	AAGGTTGGTTGAAGTGATGCGC	TCGAAATGTTTGACGCCGTTGA	22	22	62.218	61.625	50	45.455	340
1292	LInD3-346	Chr03	10063236		9916074	Nip./MH63	TCTCTTCTTCACCAACCTGGCC	TGATCCATCTCTAGTTCCGGATTGG	22	25	62.204	61.739	54.545	48	313
1293	LInD3-347	Chr03	10063594		9916398	Nip./MH63	ACATTCCCAAATCACAGATTCGCA	ACGCGGCGTATATAACTAGCACT	24	23	61.348	61.907	41.667	47.826	315
1294	LInD3-348	Chr03	10073882	10168812		Nip./ZS97	ACCGTCTTCCCCTCATCATTCC	TCTTTTTGAGCAAAGGCAGGGA	22	22	61.812	60.689	54.545	45.455	346
1295	LInD3-349	Chr03	10074021		9927117	Nip./MH63	TCCCTGCCTTTGCTCAAAAAGA	CTGAGAAGAGTGGAGGTGGTGG	22	22	60.689	61.991	45.455	59.091	308
1296	LInD3-350	Chr03	10087511	10181881	9940150	both	ACCAAAGACCTAAGCTCCGTCC	ATCGGGATTGGATGGATGGTGG	22	22	61.995	62.22	54.545	54.545	322
1297	LInD3-351	Chr03	10117587	10209435		Nip./ZS97	GGAGGAGAATAGGTGGCAAGCA	TCGACAACGCCCTATCGAAGAA	22	22	62.075	61.773	54.545	50	343
1298	LInD3-352	Chr03	10183551	10278468	10033857	both	AGCGAGACGAAACGTTGTCCTA	CCCCTTACCACCGCACTTGATA	22	22	61.955	62.066	50	54.545	344
1299	LInD3-353	Chr03	10188798	10283756	10039142	both	TGGTTTTGCCACATGGTGAGTG	ACCTTGCTTTTGGAAGTCTGCG	22	22	61.853	61.9	50	50	305
1300	LInD3-354	Chr03	10246617	10342358	10097756	both	AGCGAACAGAGTTAGGGTAGCC	CAAACCAGCCAGGAAGTGAAGC	22	22	61.79	62.222	54.545	54.545	327
1301	LInD3-355	Chr03	10396602	10490260	10244973	both	CTCTAATGTGAATGGCGGCTGC	CTGTCGGATTTACGTGGCTGTC	22	22	62.199	61.552	54.545	54.545	305
1302	LInD3-356	Chr03	10477426	10572964	10327679	both	GGCTTTGTTGCTGCTCGTGTAT	AGCCCGTGATATTCCTTGTGCT	22	22	62.016	62.075	50	50	341
1303	LInD3-357	Chr03	10532654	10624617	10379333	both	TTGTTTCCGTACCCTTTTTATCCCT	GTGAGACCCGCTGATTTGCTTT	25	22	60.458	61.709	40	50	333
1304	LInD3-358	Chr03	10780328	10827143	10596981	both	TGTTTGCTTTTGTGTTGGGGTCT	TCAGGCCTACACACATATCTCTAGT	23	25	61.636	60.399	43.478	44	334
1305	LInD3-359	Chr03	10839160		10656072	Nip./MH63	TGCCTAAGATCTCGGGAACACC	CACGTTAACAGATACTCCCTCCGT	22	24	61.799	61.932	54.545	50	348
1306	LInD3-360	Chr03	10979962	11027047	10797792	both	ACATTTCGCATGATACGCCGTC	TGTCCTAGGATGCATCACAGTGT	22	23	61.928	61.389	50	47.826	344
1307	LInD3-361	Chr03	11042063	11088987	10859860	both	TAACATATGGATGTGCGCCACG	CCGAACAAAGGCCTTTCACCAA	22	22	61.376	61.85	50	50	331
1308	LInD3-362	Chr03	11426628	11503622	10927230	both	CCGTTGTTGCCATCGAGAAGAC	CGCCTCATTCTGTCCCCTCTAG	22	22	62.056	61.915	54.545	59.091	333
1309	LInD3-363	Chr03	11459611	11543319	10966904	both	ATCTGCAAGGGGAAGGAGGGAA	GCCCACCATTTAACCTCTCCCA	22	22	63.145	62.291	54.545	54.545	300
1310	LInD3-364	Chr03	11520968	11604158	11027731	both	ACTGTTTTGACTGCTTGCCTCG	GTCCACTCAACCTCCGGATCTC	22	22	61.89	62.105	50	59.091	346
1311	LInD3-365	Chr03	11525423	11621517	11045091	both	CATCCTCTCCTCCCTCCTCACT	CACCTAGCATTCAAAGCCGCAA	22	22	62.108	62.026	59.091	50	337
1312	LInD3-366	Chr03	11622619	11733466	11157045	both	GGCATGCTTGTGACGATCATCC	GCCTCCGCCTGGTGTATATTTC	22	22	62.199	61.129	54.545	54.545	310
1313	LInD3-367	Chr03	11635717	11746561	11170146	both	GTGGGTTGGATGGATGGATGGA	GAGAACAAATGCCAGCCCTTCC	22	22	62.097	62.042	54.545	54.545	333
1314	LInD3-368	Chr03	11660770	11771305	11194890	both	GCACCGAAGAGCAGTCAATTCC	TGTTGCCTCACTCACAAGTCCA	22	22	62.071	62.069	54.545	50	340
1315	LInD3-369	Chr03	11665897	11776397	11200000	both	GGGGGTATTTGTAAGGTGAGGTGT	TCGATTGGACTGTCACGTAGGC	24	22	62.104	62.34	50	54.545	305
1316	LInD3-370	Chr03	11669290	11783005	11206610	both	AAAATGGCAAAAGGTCCCGCAT	GGCTTGTTTAGAATGCAGCCTGA	22	23	61.94	61.678	45.455	47.826	323
1317	LInD3-371	Chr03	11688965	11801621	11225229	both	TAATTGCTACTCCCTCCGTCCC	GTCGAGGAGTTGCTTCAAGTTGT	22	23	61.282	61.292	54.545	47.826	310
1318	LInD3-372	Chr03	11697629	11810505	11234120	both	TCATCTCAAGTTAGCATGCGAGT	CCTAAGCAGGCCTGATGAACAT	23	22	60.119	60.423	43.478	50	333
1319	LInD3-373	Chr03	11733753	11850666	11274280	both	CAGCTTGATCGATGCTCTTTTG	GGCCAGAAAACCGGAGCATA	22	20	61.923	61.463	45.833	50	349
1320	LInD3-374	Chr03	11739132	11856145	11279759	both	GTGCCACTGAGTTTTCACCACT	ATGGGGATCACTACACTTGGCG	22	22	61.265	62.387	50	54.545	338
1321	LInD3-375	Chr03	11751628		11292422	Nip./MH63	GCTTGGACTGTGGGGGATGTTA	TCGTCAAGCCATACTTCACTGGA	22	23	62.278	61.628	54.545	47.826	343
1322	LInD3-376	Chr03	11806801	11910184	11333803	both	ACCATGATTGAAGTATCTGTGCGC	CCCCTGTGTTGCTTGCTCAATT	24	22	61.743	61.924	45.833	50	345
1323	LInD3-377	Chr03	11837126	11939884	11363501	both	CTTACTCCTCCTTCCGGGATCG	TGATGGTCGATCATCAGGAGCA	22	22	61.653	61.279	59.091	50	315
1324	LInD3-378	Chr03	12027778	12131626	11555904	both	TTTCAGTGGCAGGCAACATACC	ATAATGCGCCAAACTAACGGCC	22	22	61.399	62.148	50	50	334
1325	LInD3-379	Chr03	12054028	12158141	11582421	both	CCCGCTGAGGATGTTGGAAAAA	ACTGATCTTCGATGGGTCAAGCA	22	23	61.399	61.946	50	47.826	325
1326	LInD3-380	Chr03	12067831	12171979	11596247	both	AGTACGAGTACTCCCTCCATACTC	CCAGTTTCGTTTGAGATGGCCC	24	22	60.202	62.027	50	54.545	340
1327	LInD3-381	Chr03	12102611	12194153	11618383	both	ATCCTGTGTTCCGAATGAGCCT	TATGAGAGACGCCACGAAGACC	22	22	61.749	61.833	50	54.545	328
1328	LInD3-382	Chr03	12252204	12313587		Nip./ZS97	AGGCGAAAATTGGACATGAGCA	AATGATCAGCTCGTCGCCAATC	22	22	61.141	61.375	45.455	50	338
1329	LInD3-383	Chr03	12266984	12328127		Nip./ZS97	GGTGTGTCACATCCAGTACAGGT	GGCACTGTGGTCCATGGACTAA	23	22	62.13	62.266	52.174	54.545	349
1330	LInD3-384	Chr03	12313326		11807811	Nip./MH63	GCACAAGAATCGCACGCAGTAT	GTGGGGTAGCATGGTGGGTAAT	22	22	62.119	62.093	50	54.545	318
1331	LInD3-385	Chr03	12329431	12390654	11823993	both	CACGTGTCAGCGAATGAGGAAG	TGGTAATAAAGACCACGTCGCA	22	22	61.798	60.029	54.545	45.455	329
1332	LInD3-386	Chr03	12483136	12571452	11999306	both	AAGAGGAGGGGGAAGCAGTTTC	ATTGACGTGCAATCCTTCTGCG	22	22	61.957	62.07	54.545	50	328
1333	LInD3-387	Chr03	12929687		12464277	Nip./MH63	AATATCCCCGACCTGTGCTAGC	CGTAGCTGATCGAGGTTCTGGA	22	22	61.932	61.579	54.545	54.545	324
1334	LInD3-388	Chr03	12930839		12465448	Nip./MH63	GCCATCCAACTCACACGGTT	CCCACATTGAATTGACGGGTCG	20	22	61.906	62.076	50	54.545	337
1335	LInD3-389	Chr03	13004382		12540467	Nip./MH63	CTTCCCCGATTCATCTGCATGC	CGGAAGAGGCTTCTCTGACGTA	22	22	61.959	61.514	54.545	54.545	315
1336	LInD3-390	Chr03	13005594		12541587	Nip./MH63	AGGGAGTATCTAAAACACTACCGCT	TCTCGAGGCTTGTGCATGAAGA	25	22	61.102	61.986	44	50	336
1337	LInD3-391	Chr03	13164856		12700723	Nip./MH63	CCAGGAGGCCAGAAAGATCACA	TCCATCACTGTCCAGGCATAGC	22	22	62.012	62.13	54.545	54.545	308
1338	LInD3-392	Chr03	13195297	13068928	12730964	both	TAAGCAGGGCAACAAAGCAAGC	TGCCAGTAAAGCATGTTTCATGAAC	22	25	62.486	60.793	50	40	330
1339	LInD3-393	Chr03	13217940	13092606	12754643	both	TCTTGCTGACGTGGTCGAAAGA	AGTTGAACCGTGGAGTGGAACA	22	22	62.16	62.066	50	50	314
1340	LInD3-394	Chr03	13257945	13133915	12795953	both	CACGGACATTTATGCGCACCAT	GCCACAACTTCAGCAATCGAGT	22	22	62.14	61.7	50	50	347
1341	LInD3-395	Chr03	13649370	13451339	13443419	both	GACACGGGTAGCCCATTTCTTG	CACACATTCTGCCCCTAAAGCG	22	22	61.513	62.081	54.545	54.545	318
1342	LInD3-396	Chr03	13698671	13486967	13478960	both	TTCTGTGTACCCACGCTTCAAT	TGTAGCTAGCTCATCCGGATGG	22	22	60.224	61.403	45.455	54.545	324
1343	LInD3-397	Chr03	13887661		13684322	Nip./MH63	CGACGCAGACACAGAGAGAGAG	TAAAACCCACCACCATCCGACT	22	22	62.365	61.625	59.091	50	347
1344	LInD3-398	Chr03	13891977	13696340	13688602	both	GCCAACCTCTTCCCCTTCTCAA	TGATGCCACTAACCGGTGCTAA	22	22	62.216	61.999	54.545	50	303
1345	LInD3-399	Chr03	13917813	13720503		Nip./ZS97	ACACGGTTTGTATGTAAATTGCGAG	GACGGCTAAATGCAAACGGACA	25	22	60.616	62.008	40	50	328
1346	LInD3-400	Chr03	14057540	13881871	13897683	both	AGTCGTCACTAGATTGAACCCACA	TTCGTGTCACCATTGTGCATCG	24	22	61.533	62	45.833	50	328
1347	LInD3-401	Chr03	14148347	13961816	13998838	both	GCGGGAGTTCTTCGACGACTTC	TCATCAGTGAGTCGATTTGGCA	22	22	63.421	60.028	59.091	45.455	309
1348	LInD3-402	Chr03	14212830		14062381	Nip./MH63	ACTGGGACAATCTTCTGTAGCG	TGCATGCAAAATCCATTGTCCCT	22	23	60.094	61.641	50	43.478	344
1349	LInD3-403	Chr03	14242389		14103075	Nip./MH63	GGTTCGAGTAGGGGCCCTTTTT	ACCATCTCACATGCGTGCAATG	22	22	62.538	62.084	54.545	50	346
1350	LInD3-404	Chr03	14274125	14085590	14127303	both	AAGAGCCACAGGAAGAAACCGA	GGGAATTCTTCAGTCGTGCAGC	22	22	61.875	62.071	50	54.545	307
1351	LInD3-405	Chr03	14312730	14121363	14167505	both	GGGCCATGTTACTCCATGTTCC	AGCACATGTGTTCACATTTACAGCT	22	25	61.271	61.722	54.545	40	344
1352	LInD3-406	Chr03	14317228	14125786	14171928	both	GCCAAGGTCAATCCAATCCCCT	TGGCAACTGAACCAAATGAGGT	22	22	62.629	60.689	54.545	45.455	347
1353	LInD3-407	Chr03	14372753	14181272	14227442	both	TTCAACAAGTGCGACATCTCGG	AGAGGTTGGCTGGAATGACGTT	22	22	61.433	62.204	50	50	349
1354	LInD3-408	Chr03	14480957	14289213	14335306	both	CATCCGCATGCTCTTCCATGAC	TTGTATACCACTCCGCCCGTTT	22	22	61.949	61.996	54.545	50	320
1355	LInD3-409	Chr03	14494562	14302808	14348901	both	AGGAGAGATACAGATTGAGACGCA	TATTGTGCAGGTACGTACGGGC	24	22	60.929	62.663	45.833	54.545	307
1356	LInD3-410	Chr03	14499229	14307304	14353395	both	ACTTGCCATGACGCATTCTCTT	CCTCTTTACAAGGGGCAAATGTCG	22	24	60.877	62.162	45.455	50	346
1357	LInD3-411	Chr03	14507931	14316041		Nip./ZS97	GATGGTTCTTCTGGCAACGGTG	GGCAAGAACAACGAGAAGGCAG	22	22	62.016	62.259	54.545	54.545	314
1358	LInD3-412	Chr03	14577277		14444342	Nip./MH63	AGCTTTGACCCAGACGACATGT	CAGGATGGATGACCGATCACGA	22	22	62.192	61.91	50	54.545	348
1359	LInD3-413	Chr03	14612588	14419705		Nip./ZS97	ACAGTGCACAGATGACAGTCCA	TCTAGTCCCCACAGTGAACGTG	22	22	61.868	61.657	50	54.545	345
1360	LInD3-414	Chr03	14623214	14430109		Nip./ZS97	GGAGGATAGGAACGAAGGCCTG	ATGGGACCCCTTAACCATTGGG	22	22	62.182	62.052	59.091	54.545	347
1361	LInD3-415	Chr03	14655094	14456121		Nip./ZS97	GCATGGTTGTTGGGGTAAGCAA	ACCGGTTTCCTCTCAACGACAA	22	22	61.926	62.117	50	50	313
1362	LInD3-416	Chr03	14680001	14481011		Nip./ZS97	GCAACATTGCGCATGGAGGATA	ATGGTGGTTTAGGCTGACGTGA	22	22	61.899	61.937	50	50	306
1363	LInD3-417	Chr03	14700640	14508505		Nip./ZS97	TCCGTCGATCTTTTGGGCTGAT	GACTGCAAAAAGGATGGGGACG	22	22	62.059	62.027	50	54.545	342
1364	LInD3-418	Chr03	14757478		14624524	Nip./MH63	TTTCGGCCAAAGTGTGTCATCG	TTTATATCTTGGAGCCCGAGCAC	22	23	61.947	60.494	50	47.826	305
1365	LInD3-419	Chr03	14757940	14560133		Nip./ZS97	AGCCCATACTCCATGTAGCACC	GGGTCCAAGATTACCACCCATT	22	22	61.879	60.024	54.545	50	317
1366	LInD3-420	Chr03	14870594		14737173	Nip./MH63	TGCATGGAGCCACCTTGTTTTC	GCACGTGCCTCTAGTTTTGCAT	22	22	61.919	62.016	50	50	349
1367	LInD3-421	Chr03	15014177		14887231	Nip./MH63	AATGTGTTCCCAGACGAGGA	GACGAGATTTTTGGCTGCCCT	20	21	61.998	62.082	54.545	54.545	331
1368	LInD3-422	Chr03	15028006	14833561		Nip./ZS97	GACAGACGACCCGAATCCTGAA	AGCGGGCTATTTTCGTAGTCGT	22	22	62.034	62.096	54.545	50	335
1369	LInD3-423	Chr03	15029681		14907095	Nip./MH63	TACCACTGAGGACGCGAATTGT	GCATGTCCCCATCCTCACAAC	22	21	61.979	61.29	50	57.143	306
1370	LInD3-424	Chr03	15064349		14935687	Nip./MH63	ATGCATCCTGACGTCGTTAGCA	TCACCCATAGCATGATGGCCAA	22	22	62.356	62.095	50	50	318
1371	LInD3-425	Chr03	15137552	14921411		Nip./ZS97	TGCAACCACTCATTACATCTGTCT	GCCTAAATATGTGCGCCTTGGT	24	22	60.263	61.586	41.667	50	308
1372	LInD3-426	Chr03	15155219	14943053		Nip./ZS97	ACCTTTTTCAGATGCTTCGGTCA	AATTACTGACAGGCCCCAGTGG	23	22	60.747	62.283	43.478	54.545	302
1373	LInD3-427	Chr03	15162858	14945429		Nip./ZS97	GAATGGAAGAGCCGCACTGC	TAGTTCCACACAATTGCGCTGG	20	22	61.987	61.704	60	50	338
1374	LInD3-428	Chr03	15185936	14955565		Nip./ZS97	GAGGAGGAAAGCAGAAGGAGCA	GGGTTGAGGACAAAGGCTTTCG	22	22	62.002	61.962	54.545	54.545	326
1375	LInD3-429	Chr03	15297086	15075691	15123915	both	AGTGGACCATTACCAGCAAAGAA	GGGGAAACAAATGAGGCAACCC	23	22	60.181	62.254	43.478	54.545	305
1376	LInD3-430	Chr03	15300234		15127023	Nip./MH63	GGATCGACTCCTAACTGCAGCT	ATACATCCGCCCGTTTGTCTCA	22	22	61.85	62.055	54.545	50	350
1377	LInD3-431	Chr03	15392146	15211864		Nip./ZS97	GTACCTGTGCTTGCTGTGTGAC	GCTCCATGCATGCAGAATCTGA	22	22	61.942	61.328	54.545	50	319
1378	LInD3-432	Chr03	15400965		15258023	Nip./MH63	CATCATTGGCTGCTTGGTGAGA	GCTCCAGCTCCAAAAGACGAAC	22	22	61.203	62.007	50	54.545	348
1379	LInD3-433	Chr03	15440568	15260994	15297630	both	CGCGAGCCAATGGATGAAATGA	GGGACGGAGGGATACATATTAATCC	22	25	61.889	60.163	50	48	323
1380	LInD3-434	Chr03	15525955	15346482		Nip./ZS97	TGCGTGTTTATAGGGGTGAGTGT	CTACCTGCCTGCTCCTACCTTG	23	22	61.885	62.12	47.826	59.091	315
1381	LInD3-435	Chr03	15610138	15429540	15487527	both	CTGGGACAAGAGGTTCAGAGGG	TCCTTGTGTAGAGGCAAGAGGC	22	22	62.002	61.998	59.091	54.545	312
1382	LInD3-436	Chr03	15685816	15511119	15569140	both	AGTAGCGGGGGATCAAACACAA	TCCCCTCCATTGTGGTGTGATC	22	22	61.947	62.018	50	54.545	342
1383	LInD3-437	Chr03	15704828	15530363	15588422	both	TGGCTACCACGCATAGCTAGTG	AGATGTGCAACCGGGAGAACAT	22	22	62.164	62.271	54.545	50	329
1384	LInD3-438	Chr03	15739344	15563859	15621881	both	GGATATTCTGCCACGGCCAAAA	GCTGGAGGTTGAAGAAGGGTCT	22	22	61.528	61.946	50	54.545	336
1385	LInD3-439	Chr03	16001085	15789593	15740969	both	GAAACTTTGCAGGTACCAGCCC	TGCATCATCAGCAGCCAGTACT	22	22	61.972	62.067	54.545	50	302
1386	LInD3-440	Chr03	16155222	15939103	15890416	both	GACGCGACAGATGTGGTCAC	GGAGCTGGCGTTAGAGGAGAAG	20	22	61.345	62.416	60	59.091	348
1387	LInD3-441	Chr03	16245534	16016454		Nip./ZS97	CTATCTCACTCACTGGCAGGCA	TGTCACCGAGGAAGCCTGAG	22	20	61.796	61.536	54.545	60	333
1388	LInD3-442	Chr03	16528806		16262258	Nip./MH63	AGCATGTCGGTATCAACTCCCA	GGGATTGGATAAGGAGGTGGGG	22	22	61.481	61.899	50	59.091	313
1389	LInD3-443	Chr03	16529657		16263068	Nip./MH63	CACTCTTTTTAGCTCTCCGGCG	TCTCACTGTCGCTTGTTCCTTT	22	22	61.555	60.159	54.545	45.455	301
1390	LInD3-444	Chr03	16583754		16307772	Nip./MH63	AGAGGGCAACAAAGAAGAGGGA	GCAAGGGCTTCACTAGAGAGTCA	22	23	61.3	61.937	50	52.174	314
1391	LInD3-445	Chr03	16611025		16338133	Nip./MH63	GGATTCGATCAAGGGGGAGTGT	ACAACCCTACTCATGCTTTCTC	22	22	61.812	61.835	54.545	45.833	337
1392	LInD3-446	Chr03	16612983		16340126	Nip./MH63	CATGCCACTAATCTCTGCACGC	GCATAGCACAACGGAAACCCTT	22	22	62.187	61.714	54.545	50	350
1393	LInD3-447	Chr03	16636125		16363212	Nip./MH63	CCGTTTGTATACCACCCTAAGATGG	ACTACCCTCTAAGTTGGTTTTGCA	25	24	60.971	60.141	48	41.667	332
1394	LInD3-448	Chr03	16690558	16424473		Nip./ZS97	AGGGTTTTGCCGGATTTGGAAC	GACAGGGAGAAGGAGGATGCTG	22	22	61.927	62.124	50	59.091	347
1395	LInD3-449	Chr03	16705038	16438969		Nip./ZS97	TCTGTCTTTGCGGTTTCTGAGGA	ATGCTTCAAGTGACTGACGTGT	23	22	62.066	60.484	47.826	45.455	340
1396	LInD3-450	Chr03	16792850	16554682		Nip./ZS97	TAACCGAGCGTTGGAGAGATCG	GCAGGGTCCAAGATCTTGCATC	22	22	62.138	61.585	54.545	54.545	348
1397	LInD3-451	Chr03	16881142	16662709		Nip./ZS97	AAGTTCCCTCGCTTCGTACTCC	GGAGATTTTACAACTACGACCTGCT	22	25	62.035	60.854	54.545	44	306
1398	LInD3-452	Chr03	17050885	16886702		Nip./ZS97	CGAAACTTGAGGCACGGAGAAC	TGCAGATCGATACAAAGATTTGGGC	22	25	61.992	61.939	54.545	44	347
1399	LInD3-453	Chr03	17103066	16938961		Nip./ZS97	ATTGAAGACCCTGCACGTGTCT	CCTAGCACCAACGATCCCCATA	22	22	62.192	61.611	50	54.545	325
1400	LInD3-454	Chr03	17507854	17003861	17241705	both	CAGCTTCGATTGGACGTTGCC	GAGAGCCGAGTTGATGGACCAC	21	22	62.439	62.921	57.143	59.091	350
1401	LInD3-455	Chr03	17549349	17048919	17286762	both	CACGAGCTGGATCGAGGACAAG	AACGAGGAAGAAGAAGGAGGGT	22	22	62.954	60.76	59.091	50	317
1402	LInD3-456	Chr03	17572593	17075021	17312862	both	GCTCTCCTATCACGGTCTTTCCA	TGAACCTGGATTCTACACGACATGA	23	25	61.748	61.791	52.174	44	342
1403	LInD3-457	Chr03	17580531	17086974	17324851	both	GCAGCGTTAAGTGAGGGTAGGA	AGTCGCGAACTTAGGAGCAAGT	22	22	62.045	61.973	54.545	50	338
1404	LInD3-458	Chr03	17589283		17328877	Nip./MH63	GGGAGTTCCTGGACACCATGAA	AGCAACTTTGTTTGGCCACCAT	22	22	61.952	61.81	54.545	45.455	342
1405	LInD3-459	Chr03	17859236		17599185	Nip./MH63	GCCGTGTCTGATAAGGCTCTCA	ATCGCGACTCTTCCATGCAAAG	22	22	62.104	61.565	54.545	50	341
1406	LInD3-460	Chr03	17869389	17262678	17609303	both	CTTAGGGGAGGGTGTGGTTCTG	GATCCTCCTCCTCGTGTCGAAG	22	22	62.009	61.892	59.091	59.091	343
1407	LInD3-461	Chr03	18043144	17442772	17791786	both	ACCATGACCTTCCATCGTAGCA	ATTCACTAAAAGGCGGCGTGTG	22	22	61.481	62.012	50	50	304
1408	LInD3-462	Chr03	18065519	17465007	17818641	both	GGTTCTCCCACAAGTGCAGACA	GGCGAATCAATCTCCGGACAGG	22	22	62.708	63.3	54.545	59.091	342
1409	LInD3-463	Chr03	18292569	17752916	18116096	both	GCTCCAGGCCAATTGGTTAACC	CATCTGCTGAATCGGCTGCAAA	22	22	62.048	62.084	54.545	50	315
1410	LInD3-464	Chr03	18684401	17941855	18462413	both	TGAGTCACAAAAGGGTACGCAC	AGGTTCATCCTGTAGGGTCTTCA	22	23	61.061	60.504	50	47.826	313
1411	LInD3-465	Chr03	19417343	19056956	19655822	both	GGGATTGCGAGGTTCTAGAGCA	CGCCATGGAAAGGGATGAGAGA	22	22	62.115	62.13	54.545	54.545	310
1412	LInD3-466	Chr03	19605225	19475054		Nip./ZS97	AAAGAAGGCCACAATCGCAAGG	AGAGAGGAGAGGGGGAGAGAGA	22	22	61.976	62.348	50	59.091	306
1413	LInD3-467	Chr03	19731404	19586123	20200272	both	TCCATATTTTCAAGTGCGGGCG	GGATGTTTGTGATTGAGCGCGA	22	22	61.831	62.065	50	50	344
1414	LInD3-468	Chr03	19874053		20343275	Nip./MH63	GCCGCCGAGTCTTTTCTTTGAT	TGGCTTGGAGTCCATGTCGATT	22	22	61.762	62.007	50	50	335
1415	LInD3-469	Chr03	19931387	19764616		Nip./ZS97	ACAGGAAGCAAAACATTCTGGACA	ACCACCTACTGATCCAGGGAGT	24	22	61.174	61.989	41.667	54.545	315
1416	LInD3-470	Chr03	19966593		20543577	Nip./MH63	TCCATGATGTGAGTGGTGGTTGT	TCACCCCTTGCTGTTTTGAACC	23	22	62.091	61.536	47.826	50	300
1417	LInD3-471	Chr03	20003747		20556809	Nip./MH63	ACAGCAGCCAACAGTAGTGAGT	TACCTAGCCATCTTTGTGCCCG	22	22	61.869	62.381	50	54.545	321
1418	LInD3-472	Chr03	20180561	19960281	20796168	both	TGTGGGCAATGCTAGAAAGTCC	AATTTTTGGAGAGACGCACGGG	22	22	60.88	61.705	50	50	348
1419	LInD3-473	Chr03	20308061	20112919		Nip./ZS97	GTCAACAGCATGGCCACTCTTC	GATAGGTGGCTCGGATGACGTT	22	22	62.02	62.166	54.545	54.545	347
1420	LInD3-474	Chr03	20311853	20116766	20948829	both	TCGAGTAGTTTGACGGGCACAT	CACCAAGCAGGAGGAGAGAAGG	22	22	61.979	62.318	50	59.091	318
1421	LInD3-475	Chr03	20362894		21014811	Nip./MH63	ATGAGTATGTCGTCGTGGCGAT	GACAAGTCAAGCCACTCTGCAC	22	22	61.897	61.946	50	54.545	326
1422	LInD3-476	Chr03	20398474		21050250	Nip./MH63	CGACACTTGAATTAGAATCATGCGC	GACAGATAGGAGCCGAGACGTG	25	22	61.278	62.197	44	59.091	300
1423	LInD3-477	Chr03	20417645	20230479	21069427	both	CGCAAACGTACGTGATGATCGA	GTAAAAACACAGGGCACGTCGG	22	22	61.593	62.497	50	54.545	312
1424	LInD3-478	Chr03	20434411		21086395	Nip./MH63	TAGTCTCCAGGTAGCACCGTAG	TATGTGCTTGCCGGAGAAGTGA	22	22	60.421	61.992	54.545	50	332
1425	LInD3-479	Chr03	20438652	20250333	21090609	both	TTTTCACCCGACTTCCTTTGCG	GGAGCCCATACTCTATGTAGCACC	22	24	61.892	62.128	50	54.167	318
1426	LInD3-480	Chr03	20440732	20252377		Nip./ZS97	ATCGAGAAAGCAAAACCAGCGG	TGCCGTGGATGCAAATTGCTAG	22	22	62.016	62.09	50	50	349
1427	LInD3-481	Chr03	20487899	20295279	21161118	both	TATGCCTGATGCCACAATGACC	TGGCCAAAGATTGCGCATATCC	22	22	61.011	61.909	50	50	341
1428	LInD3-482	Chr03	20582070	20405238	21257979	both	TCGAGACGTTGATTTTTCGCGA	TGGTGGAGTCTACGTTCAACCT	22	22	61.169	61.018	45.455	50	341
1429	LInD3-483	Chr03	20793793	20715465	21597551	both	ACCTTTTCATGGCTTCTTCCACC	AATGTGGTGAAGCAATGGCCTG	23	22	61.319	61.989	47.826	50	337
1430	LInD3-484	Chr03	20802134		21607610	Nip./MH63	TACCGCTCTACTTGTGGGTTGG	CTTGTGCAGTGGCCGGAATAAA	22	22	61.989	61.713	54.545	50	345
1431	LInD3-485	Chr03	20818142	20741585	21623561	both	AAGTTGAATTGCAGGTGGACCG	AAAGTTCTCTTCGGCTTTTGGCC	22	23	61.651	62.108	50	47.826	330
1432	LInD3-486	Chr03	20818334		21623717	Nip./MH63	TTTTTAAGTCCCGGCCAAAAGC	AATCAACATCGACGGTGCCAAC	22	22	60.224	62.012	45.455	50	336
1433	LInD3-487	Chr03	20857556	20804696	21671533	both	GGGTTGCACTAAGTGTTGCCTT	AAAGACCATTGCCGAGCCTAGT	22	22	61.595	62.009	50	50	337
1434	LInD3-488	Chr03	20939971		21782920	Nip./MH63	CCGCTAAAACCCCACACATGTT	GCTGAACTCGAAGCTCATCGC	22	21	61.657	61.966	50	57.143	347
1435	LInD3-489	Chr03	20959133	20928085		Nip./ZS97	AGACAGTTGCGCTAAATTTGCAGA	TCAGCTGATGCCACTATCACGA	24	22	61.808	61.531	41.667	50	304
1436	LInD3-490	Chr03	20962179	20931052		Nip./ZS97	TCCTTTGGGCTGTGACCTTCAA	CGTACTGGAAGCTGCAGAAAGC	22	22	62.092	62.06	50	54.545	306
1437	LInD3-491	Chr03	20984583		21828060	Nip./MH63	CCCAGCTCTCCTCCTGCATTAT	GCACCACTCAAACATGTTCGCT	22	22	61.622	62.206	54.545	50	347
1438	LInD3-492	Chr03	21013552	21000800		Nip./ZS97	GCAACACGCGAACTACCTATGT	GTCCTGGTCGGATAATCGGGAC	22	22	61.242	62.227	50	59.091	328
1439	LInD3-493	Chr03	21055143	21057027		Nip./ZS97	TAGAGCCCTACTTCCTTGAGGC	CTGCAATCCCGACACTGCTTTT	22	22	60.955	61.965	54.545	50	317
1440	LInD3-494	Chr03	21113543	21116585		Nip./ZS97	TATACCTCTTCCGCGAAAGGGC	GGTAAGCCCCCAATACACACCA	22	22	62.172	62.286	54.545	54.545	344
1441	LInD3-495	Chr03	21121907		22003664	Nip./MH63	TCTGCTGACGTTTCTGTAGCCA	TACAGTTGCCATGGCCCCATTA	22	22	61.916	62.035	50	50	313
1442	LInD3-496	Chr03	21125638	21128673	22007350	both	AAGTCCTTGGCACACCTCAT	ATTTATTTGCACACGGACGA	20	20	62.153	60.182	50	43.478	318
1443	LInD3-497	Chr03	21157839	21164616		Nip./ZS97	TGCTCATACGCGAGAACACTCA	GGTTTCTTGCAAATTGGAGCACC	22	23	62.022	61.353	50	47.826	338
1444	LInD3-498	Chr03	21171066	21177915	22052690	both	TCTATGGAAGATCGCCTTGGGC	CTCTGGTGGTGGTGACGGTAAA	22	22	62.192	62.183	54.545	54.545	343
1445	LInD3-499	Chr03	21197974	21204887	22079219	both	TCTTACTCTTTCAGCCCGTGCA	CTGACTCAGCTGCCATATCGGA	22	22	61.927	61.914	50	54.545	335
1446	LInD3-500	Chr03	21240523	21257720	22123427	both	CGGTAACAACACTGCATGGTCC	CTTGTGTGGTGTTGATGCGTGA	22	22	62.012	61.885	54.545	50	317
1447	LInD3-501	Chr03	21310109		22195494	Nip./MH63	GCAGTAATAGAAATGTGGAGGGGT	AGCAGGGGTGTCTAATCTCACA	24	22	60.385	60.827	45.833	50	350
1448	LInD3-502	Chr03	21456521	21482669	22327829	both	GATCCCACCTAACCCTTCTCCC	AGAATATAACAGCCCGCCCTCC	22	22	61.557	61.942	59.091	54.545	335
1449	LInD3-503	Chr03	21551378	21581911	22427077	both	TCTTAGGCGTCGTGGTCTTTGT	ACGTGGTAGAGTGGGTGATTCG	22	22	61.913	62.034	50	54.545	324
1450	LInD3-504	Chr03	21590717		22450596	Nip./MH63	TGCCAATTCTGAATCCACGAACA	TCTCCCTTCAATCGGCACCAAT	23	22	61.059	62.018	43.478	50	319
1451	LInD3-505	Chr03	21607663		22466750	Nip./MH63	GATGACCATCGACTTCCTCCGT	CCAGTGGCAAAGAGAGGCTAGA	22	22	61.846	61.739	54.545	54.545	315
1452	LInD3-506	Chr03	21630816		22489852	Nip./MH63	TCTTGTGGCTTTGTTCATCCGC	CTTGGCACTCCAGGAGTACACA	22	22	61.961	61.931	50	54.545	316
1453	LInD3-507	Chr03	21723040		22597007	Nip./MH63	GGTCTTGTTCGGTTTAGAGCGG	CGTGTGTATGACAGGTGGACCA	22	22	61.496	62.237	54.545	54.545	333
1454	LInD3-508	Chr03	21791233	21834405	22702120	both	CCTCTTTAACCCACCTGCACCT	TCGACTTTGTTCGCACCAACAC	22	22	62.216	62.121	54.545	50	319
1455	LInD3-509	Chr03	21794160	21837371	22705088	both	AGCCAACACTGATTTCTAGCGT	TCCGAAACAAATCTCTCGTGCA	22	22	60.29	60.547	45.455	45.455	334
1456	LInD3-510	Chr03	21866647	21845404	22794082	both	TCATGGATCTGGTATAACCGGGA	CCTGCTTAATTGGCTGCTCCAC	23	22	60.439	62.096	47.826	54.545	320
1457	LInD3-511	Chr03	22005298	22047172		Nip./ZS97	GCCTTTTGGGTTCCGAATTAATGGA	AGTGAGGTGTAGGTGTGGAGAT	25	22	62.077	60.225	44	50	350
1458	LInD3-512	Chr03	22009452	22051532		Nip./ZS97	CGACAATGAAGATGGCCTGCTC	GTGCGGGACTTTGGGTCTACTA	22	22	61.884	61.729	54.545	54.545	303
1459	LInD3-513	Chr03	22012980		22969408	Nip./MH63	ACTACAGGTTCTACGCGTGCAT	TTAGCATTGCACCATGGGATGC	22	22	62.034	61.857	50	50	332
1460	LInD3-514	Chr03	22087332		23060480	Nip./MH63	GTTCAACTTGGCCGACCTGTAC	TGTCTCGCTCCCTGCTGAAAAT	22	22	61.694	62.258	54.545	50	314
1461	LInD3-515	Chr03	22121027	22190781	23106315	both	ACCTTCCATACCTGGCATACCC	GACATGGAACCAACCGGGACTA	22	22	61.565	62	54.545	54.545	337
1462	LInD3-516	Chr03	22141788		23142916	Nip./MH63	TGCGAAACTCCTCCTATATCCGA	AGCTTCCAACTCTTGAGATGAATGT	23	25	60.75	60.514	47.826	40	344
1463	LInD3-517	Chr03	22147594	22214134		Nip./ZS97	TGGGTGCATATGAACCGAGGTT	GATCACATAGCCCGGGCCTATT	22	22	62.014	62.009	50	54.545	349
1464	LInD3-518	Chr03	22171233	22244657		Nip./ZS97	GATGCGGCGTGGATGTTGTC	CATCTTGCATGTGCTTCCTCCG	20	22	62.31	62.138	60	54.545	300
1465	LInD3-519	Chr03	22218045		23279844	Nip./MH63	GCGGTATAACTAAACGCCAGCC	CCCTGGCGGGTTAATTGGATAC	22	22	61.935	61.074	54.545	54.545	328
1466	LInD3-520	Chr03	22272914	22348114	23332340	both	GCGACGGCGGTATATTTTTGCA	ACAAACTCAACGCATGCACC	22	20	62.432	61.909	50	45.455	325
1467	LInD3-521	Chr03	22301457	22379024		Nip./ZS97	TACTGCACCACTCCTCCATTGG	GGGTGTTGCGCCATTGTCTTTA	22	22	62.007	61.967	54.545	50	342
1468	LInD3-522	Chr03	22355442		23405972	Nip./MH63	TAGTACGAACAGAAGTAAGGCCCG	CGAGGGTGTTCGGGCACTAATA	24	22	61.929	62.106	50	54.545	300
1469	LInD3-523	Chr03	22393589	22459197	23459303	both	GCTCTTGAGTTTGTCACCAAGCC	GTGTGTTGGTACATACGCGTGT	23	22	62.394	61.428	52.174	50	325
1470	LInD3-524	Chr03	22427406	22492981		Nip./ZS97	GCCCACATGTCAGATCTGCAAC	CTCTTGGATCCACCTCCTTCCC	22	22	62.085	61.816	54.545	59.091	349
1471	LInD3-525	Chr03	22432907	22498479	23532274	both	AAGTTACTTCACGCGGTGTCCT	CGACCCGACTACAATCGTACGA	22	22	62.172	61.867	50	54.545	333
1472	LInD3-526	Chr03	22439050	22504918	23538726	both	TCACACATGCACGCCATCAATC	ATCAAGCAAAGCCTTATCGCCG	22	22	62.079	61.89	50	50	328
1473	LInD3-527	Chr03	22513477	22624713		Nip./ZS97	AAAAGAGGCTCCTTGGGCAAAC	CAGCTCGATCTTTAGTCCCGGT	22	22	61.606	61.846	50	54.545	349
1474	LInD3-528	Chr03	22688757	22802653	23670048	both	CACACCAGCACACTCTACCCTT	TGACACCTCCAGTTTAGGCTCG	22	22	62.192	61.983	54.545	54.545	304
1475	LInD3-529	Chr03	22689712	22803565		Nip./ZS97	TCGAAACATCTTAGGTGCCGGT	TGTCTCATGCGAAGTGAGCGTA	22	22	61.989	62.022	50	50	314
1476	LInD3-530	Chr03	22860999	23271816		Nip./ZS97	AAACCCACAATGCTGCAACACA	GAGGGACAGGGTGTAGCTGTAG	22	22	62.057	61.533	45.455	59.091	347
1477	LInD3-531	Chr03	22981190		24146786	Nip./MH63	TGGGTTGTATCGGTTGTACCTGA	GGGCATGAAGTCATTGAGGAAAGG	23	24	61.324	61.942	47.826	50	309
1478	LInD3-532	Chr03	23100318	23507518	24299922	both	ACGGATCGGCTCTAGGCTACTA	CCGTCGTCGCTAGGAAGAATGG	22	22	61.939	63.007	54.545	59.091	348
1479	LInD3-533	Chr03	23133242	23535247		Nip./ZS97	TGTGAACGAAGGAACTGTCCCT	TTGGGAAGAAGGGAAGTCAGCC	22	22	61.545	62.216	50	54.545	347
1480	LInD3-534	Chr03	23153754	23555626		Nip./ZS97	AGAAGTAGGCCGCAGCAGATAG	AAATGGCCTTGCATGCAGAACA	22	22	61.915	61.933	54.545	45.455	304
1481	LInD3-535	Chr03	23253637	23742093	24497758	both	CCTCAATCACCTTTGGCATGGC	GTGGACACATGTTGGGAGAACA	22	22	62.365	60.748	54.545	50	312
1482	LInD3-536	Chr03	23464291		24705439	Nip./MH63	TCCAGCAGCACGAGGAATATGG	CTTGTCAATTCAGCCGTGGGTG	22	22	62.439	62.27	54.545	54.545	330
1483	LInD3-537	Chr03	23477394		24718289	Nip./MH63	ACTGTGCGGACGAAAAAGCAAA	TCCTCTCTTTTACGCCCTTGCT	22	22	62.083	61.679	45.455	50	305
1484	LInD3-538	Chr03	23492441	23844084		Nip./ZS97	ATGGGATGGCGCTATCATGGAT	ATGACACGAGGGTAATGGGGTC	22	22	61.761	61.808	50	54.545	348
1485	LInD3-539	Chr03	23515549	23867164		Nip./ZS97	ATATGTGACGTGTGGAGGTGGG	CCGTGTTCCCTCATCTACCGTT	22	22	62.059	62.045	54.545	54.545	323
1486	LInD3-540	Chr03	23540073	23891614		Nip./ZS97	GGGCCAAATCCAACACCATCTC	AAGATACCCCTGACAAGTGGGC	22	22	61.792	62.019	54.545	54.545	327
1487	LInD3-541	Chr03	23578097		24847860	Nip./MH63	ATGTTTGGGAGAGACATGGGGG	GCATCTCCCTCGATGAAGCTCT	22	22	62.034	61.919	54.545	54.545	326
1488	LInD3-542	Chr03	23579709	23931202	24849509	both	TGGGACAAATCTTGAGGGCTAAAA	TCCTTCTTCTTCCTTCTCTTCTGCA	24	25	60.448	61.457	41.667	44	315
1489	LInD3-543	Chr03	23593692	23944564	24863632	both	TCTGCCAGGCTGAGTCTAGCTA	GCGGGAGGGAGTAGTTCTCATC	22	22	62.351	61.912	54.545	59.091	328
1490	LInD3-544	Chr03	23602348		24872233	Nip./MH63	TTTGGTCAGGTGTGGGCGAAA	CTGACCTACAGTCTCCCTGCTG	21	22	62.748	61.787	52.381	59.091	321
1491	LInD3-545	Chr03	23613029	23963851		Nip./ZS97	GTGGAGGAGGATGGAGAAGCAG	ACCGCCTTCATCATTCCTTCCA	22	22	62.124	62.018	59.091	50	306
1492	LInD3-546	Chr03	23638435	23991197		Nip./ZS97	GTCTTCGACCCTTCCACCAGAC	GATTTGGAGGGTAGCTGGCTGT	22	22	62.55	62.338	59.091	54.545	320
1493	LInD3-547	Chr03	23668205		24958871	Nip./MH63	AAGCTGCCAGATGTAAGTGGGT	TTGGTTGGCAAAAAGAGCAGCG	22	22	61.956	62.976	50	50	342
1494	LInD3-548	Chr03	23700356	24046439	24994452	both	ACAGCGACCTCTAATTAGCG	CCTGTTTGGTTGGTGCCACA	20	20	62.099	62.124	50	50	321
1495	LInD3-549	Chr03	23738065		25031576	Nip./MH63	CCACATGAGGCAAAATGGGCTT	GGAGTACGGGAGAGCGATGATG	22	22	62	62.273	50	59.091	323
1496	LInD3-550	Chr03	23752497		25046060	Nip./MH63	GCTGCTATGCAACCTAGATGGC	GATCTCACGACGTAAGCCCGTA	22	22	61.703	61.881	54.545	54.545	331
1497	LInD3-551	Chr03	23866401		25143361	Nip./MH63	TGGTCGCGTCAAACCTTATCCA	GTTGCACGACCAGCATGATTGA	22	22	62.244	62.015	50	50	348
1498	LInD3-552	Chr03	23878992		25156037	Nip./MH63	GTGCCGTAATCGTGCTTTTCGA	GTGTCCAACGTTTAACCATCCATCT	22	25	62.047	61.545	50	44	318
1499	LInD3-553	Chr03	23901655	24249262		Nip./ZS97	GCAGAGATCTATAGGTGCCACTCC	CGTACTGTTGCTGCCTTAGATCG	24	23	62.122	61.574	54.167	52.174	315
1500	LInD3-554	Chr03	23903943		25183753	Nip./MH63	CGACTGGTAACACTAAGCGGGA	TGTGCGTGCGTTTATAGTGTTG	22	22	62.03	60.097	54.545	45.455	342
1501	LInD3-555	Chr03	23912549	24260210	25192471	both	TCAGAGTGATGAGACCATTGCTGA	CTCCTATGGTGGATAAGCGGGG	24	22	61.599	61.998	45.833	59.091	344
1502	LInD3-556	Chr03	23970957	24326643	25270814	both	TCTGTCACCTCTCTCACTCCCA	AAACCGTAACCCTAAAGCTGCC	22	22	61.899	61.138	54.545	50	300
1503	LInD3-557	Chr03	23972470	24328124	25272297	both	CGCCCCCACAGCTTTTCATTAA	TTAGGTCTAGGGTTTGACGCCC	22	22	61.722	61.738	50	54.545	300
1504	LInD3-558	Chr03	24014679	24369621	25314936	both	AAGAACCAGCTTAAGGCCGGAT	AACACCGCCAATCGAGTTGTTC	22	22	62.019	61.948	50	50	342
1505	LInD3-559	Chr03	24023789	24406800	25352299	both	CATACGGAGTCGATCGAGGGAC	CTCTTTCCTTTCGCCGCTTCTC	22	22	62.004	61.808	59.091	54.545	326
1506	LInD3-560	Chr03	24026804	24409826	25355325	both	AGCCCATACTCCATGTAGCACC	ACCTGATATGCTAAGTCTGCCATTT	22	25	61.879	60.398	54.545	40	310
1507	LInD3-561	Chr03	24029594	24412565	25358062	both	CCAACTGCCGATCGGATTGTTT	ACTGACATGTGGAGGCGAAGAT	22	22	61.77	61.739	50	50	349
1508	LInD3-562	Chr03	24061630	24387877	25333387	both	GCGCAAGTATACCTCCACTGCA	CTGCACTTTCATTCCGTGGGAC	22	22	62.929	62.016	54.545	54.545	334
1509	LInD3-563	Chr03	24069755		25324272	Nip./MH63	TCGCACATACGTACAGAGTCCG	GTAGAAGGCAGGGAGAGGTTGG	22	22	62.123	62.065	54.545	59.091	336
1510	LInD3-564	Chr03	24225401	24490097	25435597	both	CCTTGTGTTCACTTTGCAAGCC	GCATGCACTGTCATTCTTTTTCCC	22	24	61.055	61.383	50	45.833	330
1511	LInD3-565	Chr03	24231787	24496463	25441967	both	GAGTACGAGCTTGAACACGCAC	AGTGCATCTAGCCGGCAAAATT	22	22	62.032	61.207	54.545	45.455	344
1512	LInD3-566	Chr03	24302959	24568088	25513613	both	AGAGGGGAGAGGGAGAGAAAGG	AGGGACGTGTGCTCCTCTAGTA	22	22	62.052	62.016	59.091	54.545	344
1513	LInD3-567	Chr03	25383022		26457078	Nip./MH63	AGTGCCGGGAAAATGGAGTAGT	CCCACCCTCCCTTTTGCTTTTC	22	22	61.687	61.931	50	54.545	320
1514	LInD3-568	Chr03	25403668		26502725	Nip./MH63	CGCTTTTATCTGGTGCTCGGTG	CTAGAACGCCCGTTTTTCCGAG	22	22	62.119	61.801	54.545	54.545	302
1515	LInD3-569	Chr03	25477383		26638509	Nip./MH63	CGTGGGTGAGAGTGGTGAAAGA	ACTGCATGGAAGAGCATAAGGGA	22	23	62.176	61.716	54.545	47.826	349
1516	LInD3-570	Chr03	25879994		27035339	Nip./MH63	AGTTGGTTTGGTTGTCCATGCA	CGGTGATCACGATTTGGTTGCA	22	22	61.216	62.011	45.455	50	311
1517	LInD3-571	Chr03	26024152		27176713	Nip./MH63	GGAGGATAAGGCTGACGACCTC	TGCCTTATCCGTAACCCTGACA	22	22	61.912	61.154	59.091	50	341
1518	LInD3-572	Chr03	26160191		27317740	Nip./MH63	GATAAGGGGTCCACGTGGAGAC	AGGCGATGTGATGAGATGGGAG	22	22	62.112	61.929	59.091	54.545	311
1519	LInD3-573	Chr03	26725766		27640423	Nip./MH63	TAAGGCAAGATCGACGACAGCA	TGGCTCCAAAACAATGGGGTTT	22	22	62.033	61.229	50	45.455	329
1520	LInD3-574	Chr03	26747449	25706225		Nip./ZS97	ACCATCGACTGCAAGACCAAGT	CACACACACGTACCACAACCAG	22	22	62.192	61.873	50	54.545	312
1521	LInD3-575	Chr03	26758820	25717789	27673365	both	TGCCTTAGCTTGTCACCATCCT	TGGAACGATGTGACGGAAAAGT	22	22	61.69	60.484	50	45.455	335
1522	LInD3-576	Chr03	26869003		27828222	Nip./MH63	TGTGTGTAGGAAAGTTTTGATGCGA	CTGTGTTTCGGCGCATTAGGTT	25	22	61.428	62.012	40	50	310
1523	LInD3-577	Chr03	26986586		27919523	Nip./MH63	TGTCCAACGTTTTGATTGTCCGT	ACCAAACTGGCTCTTATCTTCGTT	23	24	61.484	60.505	43.478	41.667	313
1524	LInD3-578	Chr03	27043023	26010889	27967374	both	AAGGAGCCCTAAGAGTATCTGC	CTCCAACGCCCTGGATATCCA	22	21	61.564	61.945	52.174	54.545	347
1525	LInD3-579	Chr03	27043687	26011508	27967993	both	TCCAATGTGACACTCTTAGAGGCA	ACGGACCGTTCAGAGCAAGTTT	24	22	61.543	62.689	45.833	50	339
1526	LInD3-580	Chr03	27065493	26033417	27989942	both	TTTTCTCGAAAAGACGCGGAGC	GGTGCGAAAAAGAAACGGGTGA	22	22	61.988	62.144	50	50	315
1527	LInD3-581	Chr03	27197421		28129301	Nip./MH63	TGGCTTTTTAACCACCATTCGTCT	ACCTGCCTTTTGGTGTTGCAAA	24	22	61.23	62.002	41.667	45.455	348
1528	LInD3-582	Chr03	27252838	26229094	28180537	both	GACGGACGGTTAAAGTTGACGC	AATTGGTCCCGTTTGAACTGGC	22	22	62.283	61.916	54.545	50	336
1529	LInD3-583	Chr03	27266122	26242560		Nip./ZS97	AGACTACCCATTTGTGCCAGCT	TGCAGTCGACGTGAGATAAGCA	22	22	61.956	62.022	50	50	332
1530	LInD3-584	Chr03	27323645		28256978	Nip./MH63	GGCTCCGTTTGAATTCATGGAGG	CCTTTGTTTGTGCGGCGAGTTA	23	22	62.038	62.197	52.174	50	336
1531	LInD3-585	Chr03	27393923	26371113	28288080	both	CTTGTTATCGTCACCGCTTCGT	TGACTACCGTCAAGTGTTGGGT	22	22	61.236	61.542	50	50	340
1532	LInD3-586	Chr03	27407175	26383639	28300649	both	GGCGTACGATGACAAGGATGTG	GATGGCGGTGACTATGGCAATG	22	22	61.615	61.955	54.545	54.545	330
1533	LInD3-587	Chr03	27407974	26384388	28301399	both	GGTCGTACTAGGTGATGTCCCA	GCTCCTCCCTTCTTGGACCTTT	22	22	60.947	61.957	54.545	54.545	303
1534	LInD3-588	Chr03	27426290	26402968	28319519	both	TAGCAGCATGTGGAGACTGGAG	CGCCTGTACTGATTGCAATGCA	22	22	61.796	62.079	54.545	50	350
1535	LInD3-589	Chr03	27535811	26549588		Nip./ZS97	ACGGTCTACACCATACAACTGAGG	TAATTAAGTGCAATGCGCGGGC	24	22	61.884	62.703	50	50	328
1536	LInD3-590	Chr03	27562103		28454923	Nip./MH63	GGAAGTCATGGATCCACAAGACC	TCCTTGCTCTCGATGTCTCTGA	23	22	60.933	60.619	52.174	50	343
1537	LInD3-591	Chr03	27572136	26587882	28466822	both	TCCTAGTGCTTTCTCATGGACCA	TTCACCCTGGTCTTTCCGGTTT	23	22	61.077	62.089	47.826	50	305
1538	LInD3-592	Chr03	27873769		28766363	Nip./MH63	TCTTCGTACTCCCTCCGTTTCT	GACGGAAGACCAATTTCCACGC	22	22	60.554	62.315	50	54.545	315
1539	LInD3-593	Chr03	28055560	26813383	28945425	both	TGGTCAGATGCGGGATGATGAG	CTCGCTCTGACGCTCTCCATAG	22	22	62.184	62.254	54.545	59.091	340
1540	LInD3-594	Chr03	28116164	26891352		Nip./ZS97	CTGAACTCCCCGAGATAGAGCG	AAATTCATCTCGCGGTTTCCAAC	22	23	61.957	60.366	59.091	43.478	324
1541	LInD3-595	Chr03	28244541	27012779		Nip./ZS97	CTCAGATGCTGGCCTTGTTTGG	CTACTATACAGCGGCCCCGTTT	22	22	62.034	62.172	54.545	54.545	349
1542	LInD3-596	Chr03	28260091	27028268	29187520	both	TTTTATCCCCTCTCGCGTGGTT	AGACTCACCCGATGATTGGACG	22	22	62	62.104	50	54.545	306
1543	LInD3-597	Chr03	28344258		29271149	Nip./MH63	ACTTGCGATTTGTCCGTGTCAC	CCTCCAGTTGGCCAAATGTAGC	22	22	61.938	61.783	50	54.545	303
1544	LInD3-598	Chr03	28382315	27150359		Nip./ZS97	TGAAGCCAGTTTATGCCTACAGGA	AGCCAGGGATGTGTCGCTTATT	24	22	61.853	62.075	45.833	50	341
1545	LInD3-599	Chr03	28441911		29368887	Nip./MH63	ACTGTTCCAAATTGTGCAGC	GGTGGGAAATAAACAGGGCC	20	20	61.539	62.571	45.455	54.545	301
1546	LInD3-600	Chr03	28444631	27212819		Nip./ZS97	TGCTAAGTCTCTCCTTCGTATCACA	ATGCGACTGGTTCCCAACTGAT	25	22	61.092	62.271	44	50	300
1547	LInD3-601	Chr03	28955905		29752474	Nip./MH63	TCAAGGTCGCTGCTTGCTCTAT	TCCGTCCAGATGGCTAAGCAAA	22	22	62.053	62.003	50	50	300
1548	LInD3-602	Chr03	29076013		29876205	Nip./MH63	CCACTTTGCCTTTGCTGTTCGA	ACATAGGACCCCCACTGTACCA	22	22	62.152	62.261	50	54.545	313
1549	LInD3-603	Chr03	29125819		29925954	Nip./MH63	CCTGAGACAAGTAACAGGTGCA	AGCCCTTTACTGTATGTCAAGAGCA	22	25	60.224	62.036	50	44	300
1550	LInD3-604	Chr03	29166953		29966598	Nip./MH63	TGAGGCCTAAGATGCACTCA	GGAGGGCCAGGGCTTTTCTTAG	20	22	62.361	62.925	54.545	59.091	344
1551	LInD3-605	Chr03	29212027		30013255	Nip./MH63	TTGGTCCAACTTTCCTGCTCCT	AAGTGGCTATCGCACAAGACCT	22	22	61.831	61.998	50	50	328
1552	LInD3-606	Chr03	29280120		30079803	Nip./MH63	GACTTGTTGAGTGGCACAGTGT	AGGCCCTTTTTACATGCGTTCG	22	22	61.258	62.022	50	50	331
1553	LInD3-607	Chr03	29338034		30139350	Nip./MH63	ATCGTCGTGTGATGAGGTGGAG	TGTGCTAGATCTCTCTTGCCGG	22	22	62.093	61.849	54.545	54.545	346
1554	LInD3-608	Chr03	29386912	27683547		Nip./ZS97	GACAGAACGACCCGGTGTTCAA	ACAAGATTTGTTCTGGTGAGGAAGA	22	25	62.983	60.398	54.545	40	333
1555	LInD3-609	Chr03	29418026		30191125	Nip./MH63	CATGGATACCCTCTAAGCCCCC	CCGCAACTGGCTACAAATCTGT	22	22	61.691	61.451	59.091	50	345
1556	LInD3-610	Chr03	29523760	27827038		Nip./ZS97	CGAATCCGTCCGAAGTGAGGAT	GGCGTGGGAGGACTAGAAGAAG	22	22	62.154	62.105	54.545	59.091	339
1557	LInD3-611	Chr03	29532658		30313357	Nip./MH63	GTGCCACATAACGAACTGTGCA	CGTGTCCAACTTTGACTGTCCG	22	22	61.947	61.928	50	54.545	347
1558	LInD3-612	Chr03	29533096	27836407		Nip./ZS97	TGTGGAGTCAACTTATGCTCATGC	CCCAACCTGTCGATGGCAAAAA	24	22	61.396	61.915	45.833	50	336
1559	LInD3-613	Chr03	29548544	27851841	30329787	both	CGTCCGTGATTCGTTTCTTTCCC	TATGCTCCATTTTCCACGGCAG	23	22	62.238	61.264	52.174	50	315
1560	LInD3-614	Chr03	29564504	27868132		Nip./ZS97	GCATAGGAGGGGCTCTTCACAA	GGTCGCCATCTGTCTTGTTTGG	22	22	62.075	62.016	54.545	54.545	341
1561	LInD3-615	Chr03	29566391	27869974		Nip./ZS97	AAGGTGACATTTTCGTGTGCGG	TTGTTGCAGAGCCATCCAAACC	22	22	62.201	61.919	50	50	343
1562	LInD3-616	Chr03	29616886	27942870		Nip./ZS97	TGGCAGTCAAAACCACGAAGTA	TTTACTTGTGAGCTAGGCGGCT	22	22	60.42	61.993	45.455	50	350
1563	LInD3-617	Chr03	29621139	27947108		Nip./ZS97	TTGTCGGTTTATGTCGGTCGGT	ATTACCGTACCCCGCCTGTAAC	22	22	62.228	62.114	50	54.545	311
1564	LInD3-618	Chr03	29685277		30466268	Nip./MH63	AAAATCGCCCAAAACGAACCGA	CAACAACTACCTCCACAACGCG	22	22	61.898	62.238	45.455	54.545	345
1565	LInD3-619	Chr03	29782258	28116972		Nip./ZS97	ACGTTCGCTGCTATGGGATGTA	ACCGAACAAGGCCTTAGGGTTT	22	22	61.851	62.157	50	50	307
1566	LInD3-620	Chr03	29820299	28155641		Nip./ZS97	CCTTTCTCCCGAACACAGCCTA	GGAAAGGAAATCACGAGGCAGC	22	22	61.993	62.082	54.545	54.545	338
1567	LInD3-621	Chr03	29854550	28189863		Nip./ZS97	GGATTCGCTGGAATGTCATCG	CGAAGAAGCCATGCGTGAGAAA	21	22	62.248	61.752	54.545	50	308
1568	LInD3-622	Chr03	29911294	28248552		Nip./ZS97	CAAAAGAGCACGTGGGGAAGTG	AACTGGACTAGCACGTGTGGAA	22	22	62.206	61.861	54.545	50	343
1569	LInD3-623	Chr03	29940870		30727051	Nip./MH63	GTGGTCCCGCATTGGATGATTG	GCTAGGCGGCCCATATAGCTAT	22	22	62.156	61.607	54.545	54.545	350
1570	LInD3-624	Chr03	29972224	28294654	30745854	both	AAGGTAGCGTGGCCAAACAATG	ACAACCTGCCCTTTGGTCCTAA	22	22	61.971	61.837	50	50	317
1571	LInD3-625	Chr03	29985042		30757662	Nip./MH63	GGGGTGTGTGAGAAGAGGAGAT	ATGCCCCCAACATCTTTCTCCA	22	22	61.156	61.976	54.545	50	336
1572	LInD3-626	Chr03	29988995		30761583	Nip./MH63	TGTTTTGGATGCTCACTGACGC	ACCAAGTCCGTGGGTTTTAGGA	22	22	61.951	61.558	50	50	305
1573	LInD3-627	Chr03	30105720		30859944	Nip./MH63	ATGGTGACTTGGCAAGTGGTCT	TACAAGCTGTGGGATCGGTTGA	22	22	62.153	61.674	50	50	348
1574	LInD3-628	Chr03	30335222	28660618	31099730	both	CAGTCCAAAGGGCCTTGCTTTT	ATCGAACCAACCTCTTCCACGT	22	22	61.868	61.928	50	50	304
1575	LInD3-629	Chr03	30808875	28720246	31597454	both	GTGGTGTTTGGTTTGGTCTCCG	GAGTTGTGGCCGACTGACTTTG	22	22	62.148	61.942	54.545	54.545	309
1576	LInD3-630	Chr03	30846413	28775522	31652697	both	CGGGGTCACAGAGCGAAAGATA	TAGGACACACACTTTGGCTCGT	22	22	62.099	61.861	54.545	50	302
1577	LInD3-631	Chr03	30857758		31664072	Nip./MH63	GATGGTTCCTTGGGAGTTGGGA	ATTCAGGGACTCAAAGTGGCCA	22	22	61.962	61.898	54.545	50	313
1578	LInD3-632	Chr03	30898287	28827995	31705165	both	TGCTATTCCTGCTCTACACGCA	TGTTCTCAGATGGGTATTAAGGCCT	22	25	61.788	61.35	50	44	326
1579	LInD3-633	Chr03	31216318	29093652	31934243	both	GCTGGACAGAAAACAGGAGCAG	TGGTGGGTAGGACATCTCTGGA	22	22	61.703	61.984	54.545	54.545	305
1580	LInD3-634	Chr03	31371037	29240072	32080676	both	ACTAGTACTATCTCGGTCGACAA	AGCGAAAAGACATCTACGGGCA	23	22	60.395	62.303	44	50	337
1581	LInD3-635	Chr03	31389843	29265133	32105736	both	TGATACGAAGGTTTGATGACCACA	GCTGATAGTCAGTACGGTTCACG	24	23	60.263	61.03	41.667	52.174	343
1582	LInD3-636	Chr03	31441184	29317170	32157777	both	CTCAAGAACGGGCGTCAAGG	CTTCTCTCGCGAGGTGAGGAA	20	21	63.405	62.028	59.091	54.545	336
1583	LInD3-637	Chr03	31453315	29333040	32173647	both	AAATCCCCGTACAAAGTCTAACAGT	GCCAGTTTTATTGTGCATTTGGGT	25	24	60.222	61.042	40	41.667	340
1584	LInD3-638	Chr03	31635393	29517870	32358585	both	CGGTCTCACTCAAGCAATCAGC	TTTACGCACAATCGTTGCACGT	22	22	61.811	62.181	54.545	45.455	330
1585	LInD3-639	Chr03	31661982	29540401	32381129	both	GCTAGGACTGGAATTCATGGCC	TGTATGCAGTCCTGGATCTGGG	22	22	61.073	61.551	54.545	54.545	300
1586	LInD3-640	Chr03	31687831	29579823	32420556	both	GGGGAAGCATACGCATGGAGAA	TTGGGTGACGATTTTGGGGTCT	22	22	62.708	62.156	54.545	50	300
1587	LInD3-641	Chr03	31774895	29656971	32497710	both	CCTACGCTCCAATCAAACGACC	ACATTCACATCACGGAGGAGGC	22	22	61.56	62.633	54.545	54.545	314
1588	LInD3-642	Chr03	31854233	29724096	32564837	both	GCCTCTTTTCTTTGCCTTGCCT	TACCATAGGGCAAACCAGGACG	22	22	61.925	62.066	50	54.545	326
1589	LInD3-643	Chr03	31884800	29754125	32594868	both	GTTTCCAACCGTCGGATCGTTT	TCACTCTCCCAAGTCCCAACAC	22	22	61.69	61.875	50	54.545	344
1590	LInD3-644	Chr03	31885596	29754880	32595623	both	CACATGATGATCACGGCGTCG	TCGTCGATGCAACAAAAACTGGT	21	23	62.026	61.784	57.143	43.478	349
1591	LInD3-645	Chr03	31898144	29769286	32610006	both	CCTGGTTCCTCATCAGCTCGTT	AGCGCTCCCCTCGTTTTATACT	22	22	62.313	61.538	54.545	50	350
1592	LInD3-646	Chr03	31900783	29771874	32612593	both	AGGGACTGCTGCTGGAGTTAAA	CTTGCGGCAGATTCAGGTTGAA	22	22	61.623	61.708	50	50	339
1593	LInD3-647	Chr03	31917382	29788492	32629495	both	ACGAGGAGTAAAAGGAACACACCA	CTTGCTGCAGTAGTTCAGTGGC	24	22	61.96	62.01	45.833	54.545	317
1594	LInD3-648	Chr03	31926061		32637869	Nip./MH63	GAACCCCTGCATGACCTTCTCA	ACGAAGGCAGAAGGTTCAAGGA	22	22	62.271	61.875	54.545	50	339
1595	LInD3-649	Chr03	31969480	29840304	32681897	both	TGAAGGCACGGGATCATCAGAG	CCTGCTCATACACAACCCCGTA	22	22	62.118	62.055	54.545	54.545	341
1596	LInD3-650	Chr03	32110664		32824573	Nip./MH63	GTCTGTCCATTTGGCCATGCAT	TCTCGGTAGGACCCACCACATA	22	22	61.795	62.033	50	54.545	336
1597	LInD3-651	Chr03	32140655	30031656	32867485	both	GGGTTGGGTTTCTTTGCACGAA	AGAGAGGGAGAGACGACGGATT	22	22	62.105	62.077	50	54.545	337
1598	LInD3-652	Chr03	32159879	30050854	32886683	both	TGCCTACCTTTTAACCCATACGAA	ACGAACAAAACTACCGCGTGTT	24	22	60.02	61.561	41.667	45.455	332
1599	LInD3-653	Chr03	32281182	30185164	33020968	both	TGAGCTCATGGACAATGGCAGA	ATGCATGCATCCTCTCGTTTGC	22	22	62.011	62.149	50	50	333
1600	LInD3-654	Chr03	32522647		33231648	Nip./MH63	TGGTTTGGCAAGTGTGAATGGG	ACACCCAAAGAATTAAACACACCCT	22	25	61.863	61.106	50	40	305
1601	LInD3-655	Chr03	32523943	30387311		Nip./ZS97	ACGAAGTCTTCCAGACCGACG	GAAGTAGACCTTGGCGGAGTCG	21	22	62.068	62.647	57.143	59.091	318
1602	LInD3-656	Chr03	32571007	30435172		Nip./ZS97	CAGCAAGTGCCTGAACCATCTG	AGTTGGCTTTGTAGTTTGCTTCCT	22	24	62.024	61.174	54.545	41.667	350
1603	LInD3-657	Chr03	32583619		33292792	Nip./MH63	CCCCTCAATCTAGCCACAACCA	TGCTGCTTAGGAGTTAGGTCGG	22	22	62.018	61.789	54.545	54.545	300
1604	LInD3-658	Chr03	32637056		33347291	Nip./MH63	GGACACGAAAACCAGGGTTTGT	GTGGTCCAAACAATGCAATAGAAGA	22	25	61.526	60.048	50	40	343
1605	LInD3-659	Chr03	32651103	30523327	33361315	both	CCGGTTCACATTATGAGAGCGC	ACAACTCTAGAGATGGAGCTGAGT	22	24	61.932	60.57	54.545	45.833	306
1606	LInD3-660	Chr03	32842198		33543296	Nip./MH63	AGAGATGTGGGCAACGCTAGAC	TCAAAGTGGCATTTTATCCGGTAGG	22	25	62.362	61.379	54.545	44	319
1607	LInD3-661	Chr03	32890611	30776943		Nip./ZS97	AACTTTGGAAGTGTTCGGCAGG	CACCCACAAGCCAATTCCCAAA	22	22	61.586	61.873	50	50	300
1608	LInD3-662	Chr03	32896086	30783922	33609642	both	GCTTACCCAAAAACGGATCGCA	GGCGGCACTTCAATTGGTGTAA	22	22	62.018	61.967	50	50	316
1609	LInD3-663	Chr03	32897044	30784827	33610547	both	TGACCCCAGCAATAGCCAATCA	TGCCTGATGACTCATCCACAGT	22	22	62.028	61.42	50	50	317
1610	LInD3-664	Chr03	33027705		33754074	Nip./MH63	CCTTTACGTGCAAGAGGTTGGC	GCTCCATCGATGATTAGTCGCG	22	22	62.267	61.54	54.545	54.545	303
1611	LInD3-665	Chr03	33162955	31063391	33825747	both	CGTACCAGCCACTGCATTTCAT	TCATCTGCACAGACGCGAATTT	22	22	61.516	61.187	50	45.455	349
1612	LInD3-666	Chr03	33198048	31098559		Nip./ZS97	ATCTTCCATCTCCATGAGCGGC	TCCAGTTTGTTCCGGCCCATAT	22	22	62.512	62.025	54.545	50	344
1613	LInD3-667	Chr03	33198232		33861771	Nip./MH63	TATGGGCCGGAACAAACTGG	ACCTCCGGTGCACTTTTTCC	20	20	62.025	61.881	50	50	338
1614	LInD3-668	Chr03	33207765	31108326	33871273	both	GGCTGTATAAATTTTGCAACCCCC	ATGACGATCCGCTACGCTCC	24	20	60.922	62.131	45.833	60	345
1615	LInD3-669	Chr03	33296799	31199041	33965506	both	TCGTCCAGTAAACCGTTTCCGT	TGAAGTGGATGGGAGGGAAAGG	22	22	62.163	61.699	50	54.545	300
1616	LInD3-670	Chr03	33302522	31204729	33971194	both	TTCTTTTGCTCACAGCCACTCG	TCAAATCCATCGCCCAAACAGC	22	22	61.635	62.036	50	50	317
1617	LInD3-671	Chr03	33391182	31293174	34059644	both	GATTGAGCCTGCCACTTTGGAC	GACGGTTTACCTGCTGCATTCC	22	22	62.031	62.077	54.545	54.545	342
1618	LInD3-672	Chr03	33512664	31400306	34166798	both	TCGGGTGTTTGGTATGTGGTGT	ACGCATGGCATAGCAAAGCAAT	22	22	62.139	62.106	50	45.455	345
1619	LInD3-673	Chr03	33802714	31690480		Nip./ZS97	ACGAAGTCCCCTTCTTTTCAACTG	GCTGCTGAAGATGCATGTACCC	24	22	61.222	61.894	45.833	54.545	349
1620	LInD3-674	Chr03	33834856	31709786	34476254	both	ACCTGACAAACCCAACCACAGA	TCACTGATGGCCCCTACAAAGG	22	22	62.025	62.018	50	54.545	314
1621	LInD3-675	Chr03	34270932	31888413	34858672	both	TTCATCATGGTCGTCGGTGACA	GGTGGAGATCGGAGAGTGACAC	22	22	61.978	62.094	50	59.091	321
1622	LInD3-676	Chr03	34333475	31962847	34933116	both	CCATACTTACCTGGACGGGGTC	ACCCCACACAATTTTTCAGTCAGA	22	24	61.862	60.874	59.091	41.667	334
1623	LInD3-677	Chr03	34384537	32025315	34995592	both	TGAGTACCGTATGAGCTAAAGTGGT	ATGCATGCACCATCCCCACTAT	25	22	61.328	62.169	44	50	309
1624	LInD3-678	Chr03	34401025	32042164		Nip./ZS97	GTCCGGCGCGAAATAAACAAGA	TACAGCGACGCGGTCTCTAAAA	22	22	62.058	62.015	50	50	319
1625	LInD3-679	Chr03	34418372	32055561	35025849	both	TGCTTTGTATGTTGCCGGAACT	CAGCCTAGGCACATCCTCATCA	22	22	61.073	61.872	45.455	54.545	346
1626	LInD3-680	Chr03	34620819	32275158	35245443	both	TGCGTGCTCACATTTAGTTGCT	ACAATGAACAGGCACCATGTGT	22	22	61.385	61.016	45.455	45.455	348
1627	LInD3-681	Chr03	34633225	32282723	35253008	both	GGCCTTGTTTATCTGCTGCTCA	CAAGCAACCGTACCCAAAGCTT	22	22	61.201	61.906	50	50	307
1628	LInD3-682	Chr03	34634105	32283659	35253944	both	GGGAAACCGCCTCAAACTGTAG	TGCATCCCAGAACAACCAAATCA	22	23	61.449	61.007	54.545	43.478	333
1629	LInD3-683	Chr03	34663067	32306947	35277232	both	GCACCGTAGCAGTTCTAGAGCT	TCTCCCTTTCTCCACCTCCTCC	22	22	62.094	62.578	54.545	59.091	336
1630	LInD3-684	Chr03	34687975	32331638	35301933	both	TGCACCATCATCCTGACTCCTG	TCACTGCCAATTACTCCCTCCG	22	22	62.067	62.059	54.545	54.545	331
1631	LInD3-685	Chr03	34688163	32331858	35302153	both	TGCACCATCATCCTGACTCCTG	TCACTGCCAATTACTCCCTCCG	22	22	62.067	62.059	54.545	54.545	350
1632	LInD3-686	Chr03	35183838	32767316		Nip./ZS97	CACATGATGCTGGATTCGCTCC	TGTGTCCCTCCAGCACTCAAAA	22	22	61.949	62.081	54.545	50	330
1633	LInD3-687	Chr03	35188914	32772438		Nip./ZS97	GGGACTGAATGCAGCATGTGAC	AACAGACAAGCAACAGCCAACG	22	22	62.085	62.395	54.545	50	307
1634	LInD3-688	Chr03	35384206		35986652	Nip./MH63	TTGAAATTCTCCCCCAGGGACC	GTGTTGTGCTTTGCCTGCAATG	22	22	61.973	61.934	54.545	50	337
1635	LInD3-689	Chr03	35436564		36033913	Nip./MH63	GCAGCCATAACTGTTGCAGCTA	CACGAAGACGCCAGCCATAAC	22	21	61.516	61.915	50	57.143	302
1636	LInD3-690	Chr03	35504427	32956005		Nip./ZS97	GGTTAGAGGTAGCCCCTGTACG	TCGCAGCCATTCAACATACAATCT	22	24	61.593	61.163	59.091	41.667	325
1637	LInD3-691	Chr03	35513390	32964241	36108392	both	TGCGGAAACCATTTGACTGCAA	ACCTGATCACCAGCATAACGTT	22	22	61.849	60.027	45.455	45.455	304
1638	LInD3-692	Chr03	35544503		36143629	Nip./MH63	CCACCATTGCCAGAGTTAACCG	CGTGTGCAGGAAGATGGCTTTT	22	22	61.77	61.965	54.545	50	311
1639	LInD3-693	Chr03	35587863	33033987		Nip./ZS97	AAAGATCGAAGGAGGTCGTCGC	AACCCTAGCCCATTTCCTTCCC	22	22	62.647	62.042	54.545	54.545	348
1640	LInD3-694	Chr03	35614788		36214700	Nip./MH63	GCGTGATTGGAAGCGACTTTCA	TTTGAACATGATGTCCCGCCAC	22	22	62.001	61.713	50	50	347
1641	LInD3-695	Chr03	35864518	33255677		Nip./ZS97	CCATGATCTGGCAATATGGTGCT	TAGGACCATGTGAGCCCGAAAG	23	22	61.065	62.059	47.826	54.545	344
1642	LInD3-696	Chr03	35876726	33268604	36452557	both	TTTGCCATCGCGATCTCGTTTC	ACGATGTGGGCCATATTAGCGA	22	22	62.115	61.927	50	50	333
1643	LInD3-697	Chr03	35904764		36480733	Nip./MH63	GAGCTTTGGAAAACCCCGGTTC	TTTCCTGCGGTCCAATCAAACG	22	22	62.226	61.957	54.545	50	338
1644	LInD3-698	Chr03	35911718	33303609		Nip./ZS97	GATGATGAGCTGGTCTCCCTCC	TCCCGGTATTGCGGTTCAAGAT	22	22	61.93	62.066	59.091	50	323
1645	LInD3-699	Chr03	36001142	33377445		Nip./ZS97	AAAGAACGCTCGTAAGGAGTCCT	TGTCAGCTGTAAAACAAGCGTTCC	23	24	61.622	62.262	47.826	45.833	300
1646	LInD3-700	Chr03	36143600		36692559	Nip./MH63	CGGATAAAGTGTCTTTTGGCAAAGA	CCTGCTACGGATGAGTCTCCTC	25	22	60.278	61.648	40	59.091	350
1647	LInD3-701	Chr03	36248851	33599592		Nip./ZS97	AACTTCCCTGTCCCTCTCCTCA	ACACCGTATATGGGGCTCAAGA	22	22	62.19	60.958	54.545	50	338
1648	LInD3-702	Chr03	36281322	33627388	36812382	both	GCTTCTTTTCGTGGCATCGTCA	TGCCATGTGAAGGAGGTGATCA	22	22	62.001	61.689	50	50	337
1649	LInD4-108	Chr04	98431	69382	89803	both	TTCGGTTGCAAGATGAACGCTC	ACATGATCCCACTCCACCAACC	22	22	62.001	62.283	50	54.545	309
1650	LInD4-109	Chr04	112187	83301	103725	both	TTTTCCCCAAATTCCCGAGCTC	GATTGGAGGAACGAGGAGGTGG	22	22	61.145	62.375	50	59.091	350
1651	LInD4-110	Chr04	186753	164935	185361	both	TGTCTAGGTCATCGCATCTTGGA	AGCTGCTTGTTTGTTTTGGCTT	23	22	61.192	60.355	47.826	40.909	338
1652	LInD4-111	Chr04	201696	179705	200131	both	TATCTCTAATCTCGCCGGGCAC	GGTATAAGGCGTGGGAGAGGAC	22	22	61.715	61.918	54.545	59.091	339
1653	LInD4-112	Chr04	216025	195357	215783	both	TCGCTTCATCCATCCATCAGCT	ATGTTGATCGGAGCTCCAGTCC	22	22	61.872	62.12	50	54.545	301
1654	LInD4-113	Chr04	243379	222831	243257	both	GTGGGGGTGGCCACTTTTATTG	TCTAAGGCATGTACGCGATGGG	22	22	61.992	62.482	54.545	54.545	303
1655	LInD4-114	Chr04	243453	222875	243301	both	CATGGTTGGTGGAGTTTGCGAT	TGCTCTTATCCCTTGGCTGTCC	22	22	61.717	62.075	50	54.545	346
1656	LInD4-115	Chr04	524552	524674		Nip./ZS97	ACACTGCTCGGGAGTTACTGAC	AAGCAGGGCTACAACATGCATG	22	22	61.973	61.786	54.545	50	338
1657	LInD4-116	Chr04	597073	584178	370030	both	TCAACGACAACCAGCACCTACA	CCGGCAAATGTAAGCTGTTGGA	22	22	62.116	61.713	50	50	345
1658	LInD4-117	Chr04	601992	589056		Nip./ZS97	GACGACATCGATGGACCCACTA	CGAAAATTTGTTGTGCCTCGCC	22	22	61.584	61.73	54.545	50	348
1659	LInD4-118	Chr04	627074	637535	402851	both	CCATAGCAACGTCAAGCACCAG	CTCGCCTCTTCTTCCCATCCAA	22	22	62.07	62.064	54.545	54.545	332
1660	LInD4-119	Chr04	786145		623466	Nip./MH63	CCATCGGCTGTCCTCCTAGATG	TGAGGAGTTCTGGGAAGGAGGA	22	22	61.981	61.92	59.091	54.545	325
1661	LInD4-120	Chr04	897149		804817	Nip./MH63	ACTCGTTTGAATCGGGTGTCGT	AAAGGAGAATGACAGGGCTCGG	22	22	62.478	62.326	50	54.545	334
1662	LInD4-121	Chr04	988355	1147185		Nip./ZS97	CAACCAACATTTGCAGCCTCCA	CTTACGTAGCCCACACGCAAAA	22	22	62.178	61.689	50	50	342
1663	LInD4-122	Chr04	990853	1169656		Nip./ZS97	CACCGTCGTCCGAAATGACTTC	TATAAGTGGCTGCGAGGATGGG	22	22	61.792	61.931	54.545	54.545	314
1664	LInD4-123	Chr04	1110585		1049546	Nip./MH63	TATAAGGGATGGAGGCCAGGGA	GGGGATGGTGAAGCTTCAGTCA	22	22	61.872	62.271	54.545	54.545	320
1665	LInD4-124	Chr04	1136429		1069090	Nip./MH63	TCCGTACGAACCAAATCCCACA	AAATTCCAAGCAGCGCGTGTAA	22	22	61.929	61.957	50	45.455	306
1666	LInD4-125	Chr04	1203161	1364111	1143033	both	AGGATTTTCTTAGCCACTTTCGTGA	ACTCCCAGCCTGTGGTAGTACT	25	22	60.745	62.242	40	54.545	349
1667	LInD4-126	Chr04	1209589		1149371	Nip./MH63	TCTATGTGCCTCTCGGTATCTAACT	CCATGCATACACCTCTCCATACAC	25	24	60.456	61.04	44	50	350
1668	LInD4-127	Chr04	1752825		1463213	Nip./MH63	TTTCCACCTAGTAGAACAATTGGCT	TAGCCCATCCTGTTCACATCGG	25	22	60.222	62.125	40	54.545	315
1669	LInD4-128	Chr04	1824793	1465354	1539936	both	GCCGGATAACACACACACACAC	AAGGCTCGCAGGAGGAATATGG	22	22	62.25	62.197	54.545	54.545	336
1670	LInD4-129	Chr04	1850691	1491001	1565600	both	TGCAAGCAGACAAATGTAGAGGC	TGCTGGGAGCCACTAAGCATAG	23	22	61.67	62.13	47.826	54.545	348
1671	LInD4-130	Chr04	1870365	1510587	1585187	both	ACGAGAGCTCCAACAAGTGT	AGGTGAATTTAATGGTTGGCA	20	21	61.855	61.746	50	40	325
1672	LInD4-131	Chr04	1962684	1574373	1669211	both	TTGGACAAGGGGACATCTGTGG	TATGCGTCCGATGGTGGTTTCT	22	22	62.215	62.055	54.545	50	308
1673	LInD4-132	Chr04	1965721		1672305	Nip./MH63	GGGCTCAGTAAATCGAACCTGC	TCACTTCTCCCCGTACCAACAC	22	22	61.571	61.924	54.545	54.545	342
1674	LInD4-133	Chr04	2024998	1631515	1747433	both	GGACTCGTAATGCAGAGGACCC	GAATGCCCACCCATGACAGAAG	22	22	62.424	61.527	59.091	54.545	349
1675	LInD4-134	Chr04	2442410	1940520	2042979	both	GCCTGTTGTTTCTGTGTGAGGG	TGGCAGAGCTTTCATTTGGGTG	22	22	61.9	61.663	54.545	50	335
1676	LInD4-135	Chr04	2459009	1955152	2057613	both	TCAAGCCTCCCTTTCAGAAGCA	CTGCATGCGCCATACTACAGAA	22	22	61.888	61.06	50	50	327
1677	LInD4-136	Chr04	2520239	2016858		Nip./ZS97	TGTTTCCGTGCGGATCCATAGT	CTGGTCGGTCGATAGCTAGACG	22	22	62.055	61.993	50	59.091	306
1678	LInD4-137	Chr04	2824284		2198717	Nip./MH63	ACATATCCCAGACATCGTCCGC	ACCAAATCTCTAGACGACCCATCT	22	24	62.231	60.876	54.545	45.833	348
1679	LInD4-138	Chr04	3567547	3043519		Nip./ZS97	AGTAGCACCATCCCGGCCTA	TGATCGAGGTGTAGGGCAATCA	20	22	62.599	61.217	60	50	344
1680	LInD4-139	Chr04	3568815		2753989	Nip./MH63	TGGGTCCCATGAATTCTTACCCT	TGAGATGGCACCCAAATCCGAT	23	22	61.092	62.085	47.826	50	345
1681	LInD4-140	Chr04	3570635	3046605		Nip./ZS97	AGTAAGAACTATTGGGCGGTTAGCT	CAGGACGATGACGAGCTAGAGG	25	22	61.86	61.947	44	59.091	340
1682	LInD4-141	Chr04	3637428	3129017	2924164	both	ATCCTTCAGTTCCTCGCCTCAC	TGCATCACATTTCATTGCCCGT	22	22	62.054	61.725	54.545	45.455	348
1683	LInD4-142	Chr04	4207329	3499554		Nip./ZS97	TCATCCCCAGGAGGTTGAACTG	CAAAGTGGATGCCATGCTTCGA	22	22	61.69	61.773	54.545	50	312
1684	LInD4-143	Chr04	4412967		3694370	Nip./MH63	AGCAAGGCTTTTCTACCGGTCT	AGCCTCAATCAGATAGGGTTGCA	22	23	61.942	61.716	50	47.826	318
1685	LInD4-144	Chr04	4420945		3702328	Nip./MH63	GAAGCGCTCGATGATCCATGTG	TGTTGCTTGTGAGTTTCAGAGGC	22	23	61.989	61.791	54.545	47.826	345
1686	LInD4-145	Chr04	4521456		3903716	Nip./MH63	TCGCCACAGCTTCATCCGTG	CCCAGGAGTACACCTCAACACC	20	22	63.112	62.255	60	59.091	334
1687	LInD4-146	Chr04	4549869	3845723		Nip./ZS97	ACGATCTAAATTTCTGGATCCGCT	AGGATGGATGGAAAGGTGGTGG	24	22	60.202	62.034	41.667	54.545	319
1688	LInD4-147	Chr04	4553862	3846804		Nip./ZS97	CATCGTTAGGCGGTAGGGAAGA	TGCAGCATCTTCACTGTCAACT	22	22	61.592	60.486	54.545	45.455	322
1689	LInD4-148	Chr04	5154510		4012229	Nip./MH63	ACACACCCATACACATGCCTCT	GCACTGAGACCACACAGTTCGA	22	22	61.69	62.724	50	54.545	343
1690	LInD4-149	Chr04	5178648	4255126		Nip./ZS97	TAGACCAAACAAGGCAAGCTCG	GAGCACCTGACGACGTTGAAC	22	21	61.128	61.773	50	57.143	319
1691	LInD4-150	Chr04	5187675	4264041		Nip./ZS97	GCGTTTTGCTCACTTGCGTTTC	TGCTTGACACCTTCATTAACGCT	22	23	62.204	61.055	50	43.478	311
1692	LInD4-151	Chr04	5195082		4074088	Nip./MH63	GGAGTGTACGAAGCCATGGGAG	ACTCAATGACGTAAAAGCGATGGAC	22	25	62.68	61.862	59.091	44	304
1693	LInD4-152	Chr04	5214072	4331263		Nip./ZS97	ACTTTGGTCCAGGAGTTTGCCT	GGCTCACCTCGTTTTGCGTATC	22	22	62.098	62.116	50	54.545	337
1694	LInD4-153	Chr04	5244375		4115470	Nip./MH63	GCAAGGGCAAAAAGGAGACACA	GATGCACGGTATCTTGTGTCGC	22	22	61.854	62.168	50	54.545	319
1695	LInD4-154	Chr04	5250556	4380668		Nip./ZS97	ACCAGCCAAGATTCCTGTCCAA	GGATTGCTAGGCTCCTGTGGAT	22	22	61.898	61.883	50	54.545	349
1696	LInD4-155	Chr04	5316204	4430216		Nip./ZS97	GGAGGGAGTAGCATCGATCGTC	AACATGTGAGTGCGGATTGCTG	22	22	62.018	62.019	59.091	50	310
1697	LInD4-156	Chr04	5531273	4622791		Nip./ZS97	CACGATTGGCTGGGGAAATTCC	CGCCCATTAGCCACACATCATC	22	22	62.103	61.955	54.545	54.545	326
1698	LInD4-157	Chr04	5685955	4798347		Nip./ZS97	TCGGATCTAACATATCATGCCCAGA	ACCACTTATCCACCCCACTTACA	25	23	61.279	61.02	44	47.826	316
1699	LInD4-158	Chr04	5919486	4992129	4812790	both	CCCCTTTGAGCCTCTTCGAAGA	CAAAAGTGCCCGTGCGTTGTAA	22	22	61.998	62.697	54.545	50	319
1700	LInD4-159	Chr04	6057685	5108660	4929289	both	GTACCGATCGACACATTGCCAC	CTTGTGTCCATCCCATGCAACA	22	22	61.864	61.402	54.545	50	335
1701	LInD4-160	Chr04	6099432		4962509	Nip./MH63	CTAAACTACGGCCCGTCACTGA	GCTCATCCCCCGTTCTCTAGAT	22	22	62.03	61.084	54.545	54.545	342
1702	LInD4-161	Chr04	6327613	5319035	5086978	both	AATTTGTCCCTGATGCCAAGCC	GCGCCTTTACACTTTACGCCTT	22	22	61.738	62.009	50	50	350
1703	LInD4-162	Chr04	6429466	5465149		Nip./ZS97	ATCAAATTGTGCCGCTCCAGTG	CAAAGGTGGGAGAGGCAGCATA	22	22	62.03	62.337	50	54.545	335
1704	LInD4-163	Chr04	6431876	5467483	5231946	both	TGTGGGTGGGATAGATTTAGTCCT	TCCCTTAATATTTATTGTGGGCCCA	24	25	60.576	60.103	45.833	40	324
1705	LInD4-164	Chr04	6489178	5514302	5278740	both	TTTCCCAACCTTTGTGTGCTGG	AAGAGCTTGTTCAGACTGATGACA	22	24	61.797	60.202	50	41.667	310
1706	LInD4-165	Chr04	6490115	5515283	5279721	both	TGTTCATGTTCCCTGACCCCAG	TGTTTTCTTTCCGTGTAGAAGCACT	22	25	62.215	61.144	54.545	40	300
1707	LInD4-166	Chr04	6560488	5580911		Nip./ZS97	TGGAGACGCATCTGTAACGACT	GGAGGCTGGCTACAAGATCACT	22	22	61.456	61.806	50	54.545	308
1708	LInD4-167	Chr04	6595439	5613029		Nip./ZS97	TTGCTGGGCCTAAATAAGCTGC	CAAATCGATCGTCGTCGTCGTC	22	22	61.531	61.935	50	54.545	303
1709	LInD4-168	Chr04	6938639	6130905		Nip./ZS97	TTCGTTTGGCATGTGTACCAGC	ACCCTTCCAGGCACATGTTACA	22	22	61.957	61.894	50	50	322
1710	LInD4-169	Chr04	6969116	6161442	5782162	both	CAGGATGGGCAAGAACAGGAGA	CGGTAGGAAAGACCAGCAAGGA	22	22	62.012	61.993	54.545	54.545	329
1711	LInD4-170	Chr04	6984995		5798910	Nip./MH63	CCAAGCTAGCTGGCTGGTCTAA	TCCACATCTTCGGCCTCCTTTT	22	22	62.064	61.952	54.545	50	338
1712	LInD4-171	Chr04	7161004	6332431	5859843	both	TTAGGCTGTTTTCGGGAGGAGG	GTCAAACGTCCGATGTGACACC	22	22	62.004	61.988	54.545	54.545	300
1713	LInD4-172	Chr04	7267568	6443801	5971212	both	GGTCGTCTCATGATCAGGGGAG	TGGGAGCGACTTTTCCAGGATT	22	22	61.915	61.952	59.091	50	347
1714	LInD4-173	Chr04	7281611	6457792	5985202	both	CCAGCACGATGGAACCAACTTC	GTTAAGCAGATCTCCCAGGCCT	22	22	62.016	61.816	54.545	54.545	316
1715	LInD4-174	Chr04	7431807	6622941	6150344	both	CAGTTCTCATGGCTGGGGATGA	CGTAGGACAAAAACGGCGTCAA	22	22	62.078	61.93	54.545	50	337
1716	LInD4-175	Chr04	7492252	6657664	6185068	both	TTGACAGAGGATGAACCGGGAC	CCTGGCAGGCGCAATATCCTTA	22	22	61.993	62.774	54.545	54.545	339
1717	LInD4-176	Chr04	8064119	6923024	6448279	both	GGAATTGGAAGGGTGGGGATGA	AACCCAATCGTTTCGTGTCAGC	22	22	62.041	61.948	54.545	50	332
1718	LInD4-177	Chr04	8117719	6955236	6480484	both	TCTGCGGTCGCTAAATCTGACT	AGGCGTCTTGAACTGAAAGGGA	22	22	61.78	61.875	50	50	309
1719	LInD4-178	Chr04	8215111	7191594		Nip./ZS97	ACCAAACGCCTCTCTAGCACTT	TGTGGTGCAGCTCTTTGAAACT	22	22	61.932	60.945	50	45.455	305
1720	LInD4-179	Chr04	8527772	7623440	7587575	both	AGAAAGAGGCTGGGGTTACACC	CAGCACGACACGGTCAAAGAAA	22	22	61.953	61.873	54.545	50	326
1721	LInD4-180	Chr04	8600504	7709274	7673418	both	CCGACTTTGTTCACGCGGAATT	TGAGAAGTGGAGCTAGGTGGGA	22	22	62.25	62.241	50	54.545	345
1722	LInD4-181	Chr04	8717318	7897744	7868661	both	TTCAATACCGGACCCCCTCAAC	TGACACGAGCTTACGTTGGCTA	22	22	62.011	61.964	54.545	50	340
1723	LInD4-182	Chr04	8725447	7905860	7876777	both	TGTCTGAACTCCAGCCATCCTT	ACGATCTTATGTGTGCGACCCT	22	22	61.36	61.789	50	50	324
1724	LInD4-183	Chr04	9222835	8338122	8078434	both	GAGCTCGATTCTGGCAAGGAGA	CCACCCGTCATCTCCTTCCT	22	20	62.108	60.978	54.545	60	328
1725	LInD4-184	Chr04	9624783	8687312	8427612	both	TAGCGAACACGATGAAAGGGGT	TATAAAGCACCCCGTTCCCTCC	22	22	61.989	61.814	50	54.545	344
1726	LInD4-185	Chr04	9675853	8741671	8481973	both	ACCCCTAAATACTAGTGCATCGCA	TCAAACACGAATGACGAACCGC	24	22	61.721	62.234	45.833	50	347
1727	LInD4-186	Chr04	9944493	8976633	8680177	both	AGGACAAAGATGAAAGGACAGGAGA	AGTGTGCCCTTTGGTGCATTTC	25	22	61.463	62.179	44	50	300
1728	LInD4-187	Chr04	10691305	9522390	9443205	both	ACGCATCTGCTAGGTCAAACCT	GATTGAGCTTGTTCCGGACGTC	22	22	61.998	61.804	50	54.545	337
1729	LInD4-188	Chr04	10701958	9541894	9462709	both	CGATCTCGTCACGGAGAGCTAG	GAACTGATCGGGTTGGTGCAAG	22	22	61.987	62.016	59.091	54.545	337
1730	LInD4-189	Chr04	10934155	9760225	9675858	both	TTGCAGTAGTACCAAGGGAGGC	GGGCCCCCAGTTCAACAGATAA	22	22	62.004	62.291	54.545	54.545	345
1731	LInD4-190	Chr04	10983235	9841789	9757390	both	ACTTGGTTCCTGGTTTACGCGA	AGCACACAATCTGTAAAAGCCATGT	22	25	62.438	61.73	50	40	343
1732	LInD4-191	Chr04	11183273	10069451	9977284	both	CTCACAATTGGATCGTCGCTGG	ACACAAATTTCTCGTGCTGCCT	22	22	61.871	61.33	54.545	45.455	341
1733	LInD4-192	Chr04	11395363	10166710	10196040	both	CAAACGAGGACGAAGGCAACTC	CTGATGCTGCGGGATCGTACTA	22	22	61.992	61.962	54.545	54.545	323
1734	LInD4-193	Chr04	11483215	10258224	10287583	both	TTTCCACCAGCTCTAACCTCGA	TCACCATGAAGTCAGAGGTGCT	22	22	61.084	61.353	50	50	307
1735	LInD4-194	Chr04	11486339	10261382	10290741	both	CCTTCGGAGGACCACACAAATG	CTCCTGATCTTGGTCACGGACA	22	22	61.451	61.727	54.545	54.545	308
1736	LInD4-195	Chr04	11661045	10336745	10479687	both	GCAAGGTTAATCATTTGGCAGTACT	TGATACACCCCATCGACGTGAC	25	22	60.106	62.095	40	54.545	306
1737	LInD4-196	Chr04	11813840	10492784	10635699	both	CCATATTAAGCTGCCAGTGCCG	TCATACAGCGGCATTCCACTGA	22	22	61.955	62.058	54.545	50	313
1738	LInD4-197	Chr04	11817894	10496919	10639834	both	AGGAAAGAAATGCGCGTGTGTT	CACACAGGGACAAGTCATGCAT	22	22	61.896	61.138	45.455	50	350
1739	LInD4-198	Chr04	11828032	10509496	10652411	both	AGGGTGAGGATGAGAGACCGAT	GCCCTCACCGATCATGTCTTCT	22	22	62.104	62.12	54.545	54.545	341
1740	LInD4-199	Chr04	11868788	10542150	10685065	both	GATCATGATCACTGCGGGAG	CCAAAGGCGGACGCATAATG	20	20	61.925	62.087	54.545	50	339
1741	LInD4-200	Chr04	11913126	10572063	10714991	both	TGGTGGTTGATTATCGAGCGGA	GATGCACTACGTAGGCCACTCT	22	22	61.794	61.846	50	54.545	335
1742	LInD4-201	Chr04	11916011	10574904	10717832	both	ACCGGCTAATCCCTCCCTATGT	GCATGCATTTATATGAGTGCTCACA	22	25	62.455	60.278	54.545	40	312
1743	LInD4-202	Chr04	12048117	10641267	10784195	both	GGTGACAACCCTCAGCTTGTGA	AAACACAACCATGGGCGTCATC	22	22	62.708	61.971	54.545	50	303
1744	LInD4-203	Chr04	12062482	10655556	10798484	both	TGACCCTGTGTGTGTGTATGTGA	ATCTAATCTGATGAGGGGCCGG	23	22	61.76	61.421	47.826	54.545	350
1745	LInD4-204	Chr04	12259207	10811636	10947620	both	ATGGAGGTGGTGGATGGTGAAG	AATTTTCCCCACCGCGTAGAGA	22	22	62.023	62	54.545	50	320
1746	LInD4-205	Chr04	12363291	10943598		Nip./ZS97	AATCTTAGCAAGCACCAACGACG	ACCTGTCGGTCCCATACACAAA	23	22	61.953	61.616	47.826	50	300
1747	LInD4-206	Chr04	12625509		11324959	Nip./MH63	AGCCACATGAGGTTGAGATGGT	AATGCCTCATTAGTGCCATCTAGTG	22	25	61.694	60.976	50	44	300
1748	LInD4-207	Chr04	12684571		11406507	Nip./MH63	GGCGAAATGATTGGCAAGTAGCT	TGAACTGGTCGGCGATAAACCT	23	22	62.038	61.989	47.826	50	309
1749	LInD4-208	Chr04	12706875		11429115	Nip./MH63	TTCCAGTCCTAGAGGGCAGACT	AAATACAAAGGGCGAGGCGAAC	22	22	61.978	61.767	54.545	50	345
1750	LInD4-209	Chr04	13165597	11084784		Nip./ZS97	TAACTTTGCATCGTGAACGGCC	ATATTTGCCCCACTAGCCCTCC	22	22	62.008	61.899	50	54.545	349
1751	LInD4-210	Chr04	13174520		11839067	Nip./MH63	CATGCTCGTCTTGCTCATCGTC	GGCCGAGATGGAGAAGACAAGT	22	22	61.916	62.054	54.545	54.545	350
1752	LInD4-211	Chr04	13253535	11190726		Nip./ZS97	AAAGACATAAGGTTGGGGCGGA	GGTCGGTTGTCCAAAATCCACA	22	22	61.958	61.331	50	50	326
1753	LInD4-212	Chr04	13288185		11964125	Nip./MH63	TTCGACTGTTCCATGGTGACCA	CATGCAGCAACAAGGCCATGTA	22	22	61.87	62.04	50	50	341
1754	LInD4-213	Chr04	13355862		12076419	Nip./MH63	CCCAATGCCTCCTAAGCCCTAA	TAAGCACTTCCTATAGGCGGCC	22	22	61.831	61.928	54.545	54.545	338
1755	LInD4-214	Chr04	13389969	11394426	12112255	both	GCGTTGGAATGGTTGAGGATCC	ACACGTGCTGGCATAAAAGTTCT	22	23	61.835	61.304	54.545	43.478	332
1756	LInD4-215	Chr04	13399732	11414816	12132618	both	GGTCAGCAAAGTCCAGCAACAA	CGTGTTACTGTGCTGACGTCAC	22	22	61.844	61.968	50	54.545	308
1757	LInD4-216	Chr04	13498487	11510039		Nip./ZS97	CACTGTCGCACACACTCGGA	TCTGGAAACCACGAGACGAATCT	20	23	62.678	61.621	60	47.826	308
1758	LInD4-217	Chr04	13617729	11635620	12479679	both	CCGATCCAGAGGAAGGCGATTT	CCATACCATCATAAATTTCCAGGCC	22	25	62.441	60.047	54.545	44	348
1759	LInD4-218	Chr04	13618442		12480346	Nip./MH63	ACACGGTCTCCAAAACACAACT	TGCTTTAGTTTTGCCCTCGTTACA	22	24	60.617	61.223	45.455	41.667	350
1760	LInD4-219	Chr04	13666394	11669543		Nip./ZS97	AAATCTTGTTGCAACGCACGGA	TGCATGAGCTCAGTTGCAAGTT	22	22	62.147	61.332	45.455	45.455	301
1761	LInD4-220	Chr04	14094098	12127099	12621666	both	TCATGCAGGTCAGAATTCACAGGA	TGCCTCTGTGCATCCTCTAACT	24	22	62.089	61.155	45.833	50	347
1762	LInD4-221	Chr04	14178818	12181636	12676203	both	CGGCGGATCCAGGTCTTTCT	AAGGGTGAACTTGGGAGGGATG	20	22	61.961	61.967	60	54.545	336
1763	LInD4-222	Chr04	14231003	12218219	12712786	both	CGCTGACAGGGATGGATCTAGG	CGCCCTAACACTAACCTCTCCC	22	22	61.981	62.112	59.091	59.091	347
1764	LInD4-223	Chr04	15863362		14040731	Nip./MH63	TGCTGTTCGTGGATATGTGGTT	CGACGAGGAGGATGATGGAGAC	22	22	60.29	61.957	45.455	59.091	349
1765	LInD4-224	Chr04	15890938	13254780		Nip./ZS97	AGGTTTTGGTTTTGGGCGGTTT	AGAATTCAGGCCAAGTTGCTGC	22	22	62.01	61.98	45.455	50	348
1766	LInD4-225	Chr04	15910077	13274259	14105003	both	GAGGAGGCGTAGTGTGGTAGTG	CCACTTGATTTTCACGGGTGGG	22	22	62.089	61.971	59.091	54.545	307
1767	LInD4-226	Chr04	15914378	13278483		Nip./ZS97	GAGGAGTGGGAGGAGGTATTGC	GTAGCGGGTGGGTATTTGCAAC	22	22	61.87	62.084	59.091	54.545	327
1768	LInD4-227	Chr04	15945342		14140519	Nip./MH63	GACCGTTATTCCCTCCATCCCA	AGTTGAGGGTGTCGAATGTCCA	22	22	61.553	61.611	54.545	50	304
1769	LInD4-228	Chr04	16454910	13830308	14668736	both	AGTGCCAGCTAAGATGACACGT	TTCACCCCCTTCAACACCATCA	22	22	61.987	61.836	50	50	322
1770	LInD4-229	Chr04	16586423	14039509	14877029	both	TAGAACGGACTCTCCAAAGCCG	TTGACTTGTTTGCTTCCTGCCG	22	22	62.034	62.152	54.545	50	310
1771	LInD4-230	Chr04	16623931		14915783	Nip./MH63	ATGTCCACTTGCTCAGAGGGTG	TGGAGCAAGTACCAGGGTGTTT	22	22	62.263	61.827	54.545	50	331
1772	LInD4-231	Chr04	16637218	14098993		Nip./ZS97	CCTGCAGTAACGTACGTTGTTCC	TCTTACGCTCCCTAAATAGGCCT	23	23	61.936	60.693	52.174	47.826	340
1773	LInD4-232	Chr04	17040261	14431761	15131067	both	AACGCCAGAAATCCCGTTAACG	TGTTGCCTCAGGTCTTCGACTT	22	22	61.754	61.865	50	50	303
1774	LInD4-233	Chr04	17100325		15190782	Nip./MH63	CATCACGAATCGCCCCGAAATC	TCGTCCGATATGGCATCGTTGA	22	22	62.243	61.902	54.545	50	314
1775	LInD4-234	Chr04	17172412	14563507		Nip./ZS97	AGGCAGCCAACCTCATCTTCAT	AAAAGAGTTGGGGCGGAAATGC	22	22	62.027	62.241	50	50	343
1776	LInD4-235	Chr04	17485456		15587083	Nip./MH63	AACAAGAGCCACACCATGCATC	ACAATCTCAATGCGGGAGGACA	22	22	61.72	62.007	50	50	305
1777	LInD4-236	Chr04	17604354		15677119	Nip./MH63	TGAGCGTTCAACGTTTGGATGG	CAGAGACAGAGTCAAGTGCGGA	22	22	61.947	61.966	50	54.545	327
1778	LInD4-237	Chr04	17657162	15050010		Nip./ZS97	GCGCTCTGTCAGGCTTCACTAA	AGCACCGAAGAAGCAAAGCATC	22	22	62.855	62.02	54.545	50	341
1779	LInD4-238	Chr04	18136374		16553576	Nip./MH63	TTTGCCATCATCGTCGTTGCTC	CCTCCATGTCCCCACCATCATT	22	22	62.065	62.101	50	54.545	324
1780	LInD4-239	Chr04	18219192		16643304	Nip./MH63	CAGCACCTGAGCTTTCAGCATC	GAAGGACGCTACGGAACTCCAT	22	22	62.078	62.1	54.545	54.545	308
1781	LInD4-240	Chr04	18221754		16645825	Nip./MH63	TACCAGGATACATGGACGCGTG	TCCATGCGAAAAGACAGTGTTGT	22	23	62.16	61.241	54.545	43.478	309
1782	LInD4-241	Chr04	18407043		16822083	Nip./MH63	CGCCATTGCAACCTATCCATCA	TCCTCTCATTCCTTGACGCAGC	22	22	61.329	62.619	50	54.545	327
1783	LInD4-242	Chr04	18453205		16858775	Nip./MH63	TTCTGATCGGGCAGGGGATTTT	GAGCTGTGACGAAGCGAAATCC	22	22	62.029	62.109	50	54.545	333
1784	LInD4-243	Chr04	18527156		16949810	Nip./MH63	AGAACCGAGCTTTGTCAGTGCT	TAAGGCGCCGGAACATCTTTTC	22	22	62.441	61.51	50	50	336
1785	LInD4-244	Chr04	18557770		16984339	Nip./MH63	TGGAACCAAAGAAAGTGCAGGT	CTTGCTTTTCTTGCCCACGGTT	22	22	60.623	62.421	45.455	50	350
1786	LInD4-245	Chr04	18599874		17017910	Nip./MH63	CCTCTGTTCGTCAGGCCAAGTA	AACCCAATCCCACCACACAAGA	22	22	61.983	62.104	54.545	50	320
1787	LInD4-246	Chr04	18980965	16554872		Nip./ZS97	TACTGAAACTTCGCGCAAATGC	ACCAATAGAAGTGATCTCAGGCGT	22	24	60.664	61.659	45.455	45.833	306
1788	LInD4-247	Chr04	19203134		17603532	Nip./MH63	TACGTAACGTACATCCCCGTGC	AGCTTGGCTCAACTCAACATCA	22	22	62.39	60.488	54.545	45.455	319
1789	LInD4-248	Chr04	19214191		17614704	Nip./MH63	ATCCCGTTTCTCCCATGCTAGG	GTTAAGCATGCTTGGCCTGGAG	22	22	61.879	62.096	54.545	54.545	336
1790	LInD4-249	Chr04	19485249		17722194	Nip./MH63	CACGGGAGGTTACATTTGTGGC	AGTGTGACATCTAAGTACGCTGGA	22	24	62.022	61.347	54.545	45.833	350
1791	LInD4-250	Chr04	19491028		17740988	Nip./MH63	TAGTTTGGAGGTGTGGCCGTAG	TGCAGCCTAGCTCTTATGCTCT	22	22	61.989	61.283	54.545	50	322
1792	LInD4-251	Chr04	19568503		17818863	Nip./MH63	GGCAAAATGGGAGCTGACATGG	GTGTTTTATCGAGCACCCGCAA	22	22	62.365	62.008	54.545	50	350
1793	LInD4-252	Chr04	19624353	17212805	17874931	both	TTGGAGACTGTGTCACTGTCCT	ACCCAAGCAACTAATACTCGTGGT	22	24	60.955	62.083	50	45.833	320
1794	LInD4-253	Chr04	19643977	17232189	17894316	both	CAGCCTCTAAATTTGACCGGCC	CAGTTGAACTGCCCAGTGTTGG	22	22	61.835	62.156	54.545	54.545	311
1795	LInD4-254	Chr04	19647804	17236356	17898495	both	ATCGATCAAAAACCGATGGCCG	GACCTTTAGTCCCGGCACCAA	22	21	61.886	62.328	50	57.143	305
1796	LInD4-255	Chr04	19661516	17249966	17912131	both	CGAAATGAAAGGTTCACCCCGG	ACAGGGTGAAAATCATACGCGA	22	22	62.022	60.354	54.545	45.455	303
1797	LInD4-256	Chr04	19669028	17257492	17919669	both	TGGTCAATTTTCATGGGCAACACA	CGACCACACATCCACACAACTG	24	22	61.961	61.941	41.667	54.545	331
1798	LInD4-257	Chr04	19690237	17278668	17940858	both	ATCCTACGGCCGCATTGTGATA	AGTTGGGTGACAGCTCTGGTTT	22	22	61.927	62.086	50	50	304
1799	LInD4-258	Chr04	19701104	17289510	17951700	both	TGCAGACATTTGGCTAAGTGGC	TTTTTGGACCCAGGGAATCTACC	22	23	61.717	60.245	50	47.826	318
1800	LInD4-259	Chr04	19904875	17485349	18156136	both	TAGGCCGTAAGAGCGAACATGG	TGGTTGTCCCAAAATCAACGCT	22	22	62.417	61.274	54.545	45.455	332
1801	LInD4-260	Chr04	19904929	17485366	18156153	both	TAGGCCGTAAGAGCGAACATGG	TGGTTGTCCCAAAATCAACGCT	22	22	62.417	61.274	54.545	45.455	332
1802	LInD4-261	Chr04	19906562	17486975	18157762	both	ACCGGGTCAATTTGGTCCCTAA	CGTTTATGACTGCCTGACTGGG	22	22	61.634	61.252	50	54.545	322
1803	LInD4-262	Chr04	19929091	17509437	18180225	both	GGGCGGGATGGGTATTGTTAGA	CGCCCAACCTGGTAAGATCTCT	22	22	61.881	61.803	54.545	54.545	318
1804	LInD4-263	Chr04	19982349	17562434	18233178	both	TCACTCCCTCTCGCCTTCTAGA	CACGGAGCATATCACGTTTCGG	22	22	61.755	61.918	54.545	54.545	339
1805	LInD4-264	Chr04	20065086	17657570	18328127	both	CCTCCGTGCTCGTAAAGGAAGT	TGCATGGATAAATTGGGGAGTGT	22	23	62.292	60.31	54.545	43.478	345
1806	LInD4-265	Chr04	20171350	17773326	18443903	both	CCTGTTCTTGTGTTGAACTGAACGT	GTGCCATTGTCACCTCCTACCT	25	22	62.096	62.009	44	54.545	317
1807	LInD4-266	Chr04	20171607	17773539	18444116	both	AGGTAGGAGGTGACAATGGCAC	CTCGCTCTGACCGCATCAAAAT	22	22	62.009	61.565	54.545	50	326
1808	LInD4-267	Chr04	20209319	17812739	18483313	both	TGCTAGCAGCGCACAAAGGG	CCTCTCCCTTTGTGTGCTACCG	20	22	63.688	62.871	60	59.091	311
1809	LInD4-268	Chr04	20236407	17846113	18516670	both	ACACTACAGTCTACAGGTCAGCA	AGCTTGCGAATACTCTGCCTGA	23	22	60.751	62.053	47.826	50	333
1810	LInD4-269	Chr04	20267340	17883541	18554100	both	ATGGATCGATCGACGGGAGAAC	AGTGGCCACAGCACTATGGATT	22	22	61.963	62.023	54.545	50	342
1811	LInD4-270	Chr04	20291436	17907680	18578242	both	AGGATACGTTACGTTGCGGACA	CAACGAACAATGCAAGAACGCG	22	22	62.026	62.009	50	50	318
1812	LInD4-271	Chr04	20362661	17985717	18656274	both	CTAGGAAACCGGAGCCTACAGG	TAGGCCGGGCAGTAATAGAACG	22	22	61.856	61.913	59.091	54.545	350
1813	LInD4-272	Chr04	20421884	18041133	18711709	both	TAAGCCACGAGAAGGAGCAGTG	TCCGTGACCTGCATGTTTCTCT	22	22	62.296	61.931	54.545	50	349
1814	LInD4-273	Chr04	20438877		18728549	Nip./MH63	ACGTAATGAATGGTACTTCCTCCGT	ACGTGCGCTAAAAATGACACAGT	25	23	61.847	61.838	44	43.478	312
1815	LInD4-274	Chr04	20465061	18083953	18754526	both	CACACATGGAGGAGGAGATGCA	CATCGATCCGGAGCTGACTAGG	22	22	62.067	62.021	54.545	59.091	346
1816	LInD4-275	Chr04	20530618	18154469	18825042	both	CTCTCCACGAGTGACAGGTCAT	GTCAAGAGGTACGTCTGCCCTT	22	22	61.462	61.984	54.545	54.545	341
1817	LInD4-276	Chr04	20582679	18206636	18877209	both	CAACGGGTTCGGCACACAAT	TACTGCTACCGGATGCACCA	20	20	61.953	61.999	50	50	320
1818	LInD4-277	Chr04	20608248	18231341	18901975	both	TCAGCAGCTGCCTTGGATACTT	GTGGGCTCCATGATCGTATCCA	22	22	62.012	61.931	50	54.545	315
1819	LInD4-278	Chr04	20686020	18296458		Nip./ZS97	CAGACGGTTTGGAAAACCCTGG	GTGGTAAAAGCTCGCCGTTGAA	22	22	61.906	61.944	54.545	50	343
1820	LInD4-279	Chr04	20687760	18298224		Nip./ZS97	ACGGCCTTATTCGTTTTTCTTTCCA	GCAATTGAGGGTGACGTATGGG	25	22	61.721	61.578	40	54.545	308
1821	LInD4-280	Chr04	20689634		18970196	Nip./MH63	ACTCGCTTCTTTTCACACTTCCT	TAAGCAAGGCCTGAGTTCGAGG	23	22	60.432	62.308	43.478	54.545	319
1822	LInD4-281	Chr04	20724463	18346436	19005665	both	TCCCAAGCTGCAACCATCAAAC	GCCCAGGAAGGAAGTGAAAGGA	22	22	61.919	62.216	50	54.545	339
1823	LInD4-282	Chr04	21288208	18600719	19295143	both	GCTCTTAACCAACCGATGACGC	GTGGGCAAGGGAAGCTATGGTA	22	22	62.116	62.082	54.545	54.545	327
1824	LInD4-283	Chr04	21467889		19520945	Nip./MH63	ACGGGACCAAATTACCCTCGTT	CGGATGGCCATCTTGTGAACTG	22	22	61.944	61.829	50	54.545	336
1825	LInD4-284	Chr04	21476980		19530028	Nip./MH63	GGTCAGAGATATATGGCGGCGT	CACCCTGAGTTCCCAAGTTTGC	22	22	62.039	61.91	54.545	54.545	309
1826	LInD4-285	Chr04	21542456	18855520	19579770	both	CGGCTGTTCCAAGCACTCTTAG	GGAAGCAATGGATCAAGCAGGG	22	22	61.501	61.852	54.545	54.545	324
1827	LInD4-286	Chr04	21547070		19584431	Nip./MH63	ACCCACGTCTGGTCTCATGATG	AGTTCCCGTAGCGCATGTAACT	22	22	62.053	62.045	54.545	50	343
1828	LInD4-287	Chr04	21605315	18920756		Nip./ZS97	GGTTGATTGGATGATAGGGTCGC	CCAAATGTCCCGTCCAAATTCGT	23	23	61.36	61.919	52.174	47.826	303
1829	LInD4-288	Chr04	21619515	18934946		Nip./ZS97	AAGCTCTCCCAAACAGACCCTC	GGCTCTAGTGGAATCGAGGCAT	22	22	61.946	61.926	54.545	54.545	320
1830	LInD4-289	Chr04	21632560	18947923		Nip./ZS97	TCTTCCACCGTTCCATGACTCC	CAGCCATCCTACTCGTGTGTGA	22	22	61.993	62.038	54.545	54.545	317
1831	LInD4-290	Chr04	22195837	19185668	20229257	both	GTTGACGTACTCCCTCTGTCCC	CTTCTACTACCTGGCCACCACG	22	22	62.035	62.357	59.091	59.091	322
1832	LInD4-291	Chr04	22246587	19235127	20278715	both	GCCGTATGGAACTTGAAAGGGTG	ACAACTACCGGTGTCGTCGAAA	23	22	61.972	62.152	52.174	50	339
1833	LInD4-292	Chr04	22251229	19239815	20283403	both	AGTCCACTCTCACATTTGACCATCT	CGTGGGACGGAGGGAGTACTAA	25	22	61.75	62.907	44	59.091	309
1834	LInD4-293	Chr04	22305452	19294357		Nip./ZS97	GGAGACCGACCCAAGTAAGCTC	AAGCGAGGGGGAGAAGAAAGAG	22	22	62.358	61.74	59.091	54.545	318
1835	LInD4-294	Chr04	22371496		20370369	Nip./MH63	ACCAGCCACGGCAAATTGAAAA	CCGCTACTCTTCTCTCTCCTCC	22	22	62.12	61.069	45.455	59.091	321
1836	LInD4-295	Chr04	22379390		20378195	Nip./MH63	ATTGACAACTAGCTGGGTGGCC	AGGAGAATGAACAGAAACGGCA	22	22	62.857	60.225	54.545	45.455	307
1837	LInD4-296	Chr04	22411479		20410702	Nip./MH63	AACCGCTTTCAAAACCACCGAG	TTGTCACACGTTTGGTTGGGTG	22	22	62.148	62.028	50	50	327
1838	LInD4-297	Chr04	22453404	19442325		Nip./ZS97	ATGAGCCCAGGGGAGAGGAATA	CAGTCCCACCATACAGAGCGAA	22	22	62.138	62.048	54.545	54.545	341
1839	LInD4-298	Chr04	22540419	19505220	20538282	both	TGCACAGAGAAAATTCGCGCTT	GGTTCGTGTTTTTAGCCCTCGG	22	22	61.951	62.009	45.455	54.545	339
1840	LInD4-299	Chr04	23502931		21005170	Nip./MH63	AGCGAAGGGGTCTGAACAAAGA	TGACTTACATTGTGAAACGGAGGA	22	24	61.875	60.202	50	41.667	307
1841	LInD4-300	Chr04	23548843		21051087	Nip./MH63	CAGGACATTGTGTGCCACCATC	TGGCTTCAGAAGGACCATGAGA	22	22	62.03	61.094	54.545	50	349
1842	LInD4-301	Chr04	23573689		21075967	Nip./MH63	AGGACGGAAGGGAGTACTAGCT	AACTTTTTGGGGACAGAGGGGT	22	22	61.766	61.783	54.545	50	319
1843	LInD4-302	Chr04	23826212	20537245	21369638	both	GACAGACGGGCCTATAACCAGT	GCGTCCTTGTCTCGTAGTACGT	22	22	61.538	62.06	54.545	54.545	326
1844	LInD4-303	Chr04	23833236	20544246	21376640	both	AACTGAGCGCTCCAAAAGGTTC	CCAGAAGTTCAGCCTGCAATGG	22	22	61.644	62.034	50	54.545	322
1845	LInD4-304	Chr04	23837880	20548826	21381222	both	TCCGCTCAATAAGTACTCCTACAGA	GGCGGCAAATCCCCAAATATCT	25	22	60.631	61.344	44	50	325
1846	LInD4-305	Chr04	23963908	20637388	21469818	both	AGGGTTGGCTAGCGTAACAGAG	GGGAAATGCTGGCAGCCTTAAT	22	22	62.049	61.543	54.545	50	350
1847	LInD4-306	Chr04	23979399	20657224	21489652	both	CTGCCTATTTGCGGTTCGGTTT	GGGGATGTGATTCAACAAGCCC	22	22	62.022	61.792	50	54.545	302
1848	LInD4-307	Chr04	24002454	20664094	21496525	both	TCAGGTGCAGGATGTGTTGTGA	CTTTCGGCCCAGGAGAAGAGAT	22	22	62.136	61.806	50	54.545	314
1849	LInD4-308	Chr04	24002812	20664437	21496868	both	CCGAAACCGATTGCAAGCAAAC	GCACTCCACCTAAGACTGCGAT	22	22	61.73	62.362	50	54.545	335
1850	LInD4-309	Chr04	24019921	20681831	21514263	both	TGCAGCTGTGTGGTATCTGTAGT	AGCACTCAACGAATGGCTACAA	23	22	61.632	60.55	47.826	45.455	310
1851	LInD4-310	Chr04	24128610	20810784		Nip./ZS97	CATTTCGTTGCTGCCTGTGGAT	TTAGCCTTGATGTGCATGCAGC	22	22	62.03	62.095	50	50	327
1852	LInD4-311	Chr04	24183413	20865424		Nip./ZS97	AGATTCCTGCAGAGTAGACTGTGT	ACTCTTGGGATCCCTTCGTAGC	24	22	61.056	61.541	45.833	54.545	344
1853	LInD4-312	Chr04	24202659	20881382		Nip./ZS97	CTTGAGGTGGTCACTGTCCTCC	TGGCGTGACAGTAAAGCACAAC	22	22	62.247	61.883	59.091	50	349
1854	LInD4-313	Chr04	24275677	20965991		Nip./ZS97	GTTAGCTTGTGGGGTTTGGGTG	TCCAGTCTAGTCCACCATCTCCT	22	23	61.916	61.669	54.545	52.174	335
1855	LInD4-314	Chr04	24299587	20989225		Nip./ZS97	GGTCTAAGAACAAGACGGGCCT	GCAAATCTTCTGTGTGGTGCCA	22	22	61.995	61.909	54.545	50	343
1856	LInD4-315	Chr04	24304196	20993753		Nip./ZS97	TCGGCCGAATTGTAAATCGAAAAGT	TCACTTCTAACGCAAAAGACCGA	25	23	61.818	60.491	40	43.478	350
1857	LInD4-316	Chr04	24334855	21024366		Nip./ZS97	CAATGGCATCCATAACGCGAGG	GGGTTTTCTTTTGCTCTTACACCGA	22	25	62.258	61.942	54.545	44	350
1858	LInD4-317	Chr04	24431463	21134497	21932893	both	GCAATTGGCATCATGTGGAGGT	GCCATTCCTGCTTGTTCATATCCA	22	24	61.795	61.47	50	45.833	340
1859	LInD4-318	Chr04	24605384	21323412	22121854	both	TTGAGTACGGGAAGTCGGGAAC	TGTCTTCATTGCATTGGCGCAT	22	22	61.976	62.04	54.545	45.455	335
1860	LInD4-319	Chr04	24617360	21335425	22133867	both	TATCCTCCCTAACACCAGGCCT	TGGAGTGTGGTGATCGGAAAACT	22	23	62.064	62.076	54.545	47.826	328
1861	LInD4-320	Chr04	24621727	21339829	22138270	both	AGGCCAATGTCCAGACCATCAA	GCATGCATTCTAGGGCGACATG	22	22	61.965	62.263	50	54.545	311
1862	LInD4-321	Chr04	24670596	21421892	22220320	both	AAGTCCCAAGGGAGAGCATTGG	CCTGTTTGCTGCGGATTCTGTT	22	22	62.288	61.965	54.545	50	344
1863	LInD4-322	Chr04	24806614	21546862	22345245	both	GTGTTTGGCTGACGTGATGGTT	GCCTGCTCATTGTACGACGAGA	22	22	61.896	62.646	50	54.545	323
1864	LInD4-323	Chr04	24857535	21602625	22401018	both	CCAAACCAGGACTTTTGCGTGA	ACAAAAAGTTAAGGGTGTTGGCTCT	22	25	61.84	61.336	50	40	341
1865	LInD4-324	Chr04	24858025	21603076	22401469	both	CATGATTTGGCTGCTGTCGACA	CTGTGCATTGTCCTGATGGCTG	22	22	61.763	62.088	50	54.545	319
1866	LInD4-325	Chr04	24859579	21604594	22402987	both	CTTGTTCGTCGCTGCCATCTTT	CGTCACACACATGGAAAGCTGG	22	22	62.006	62.258	50	54.545	322
1867	LInD4-326	Chr04	24964059	21720826		Nip./ZS97	CAAGGAGGAGGTGACGACAGAG	TCGAGTACGTTGAATCCCAGGA	22	22	62.032	60.881	59.091	50	318
1868	LInD4-327	Chr04	24977037	21731289	22529668	both	CTTCTCACACACATCACGCTGG	TCGTGTCCATCAAGAGGCTCAA	22	22	61.746	61.669	54.545	50	300
1869	LInD4-328	Chr04	25011168	21765179	22563560	both	CCGTCACGGCAAAGAGAACTAA	CCTAGTGGCGATTTGGGGAGTT	22	22	60.865	62.333	50	54.545	336
1870	LInD4-329	Chr04	25013832	21767831		Nip./ZS97	GCCTCGCTTTTTATGCCCTTCT	GATGAGAAGCAAGCACTCGCAG	22	22	61.524	62.117	50	54.545	317
1871	LInD4-330	Chr04	25029643	21783843	22582237	both	TCATTCACCCACTTCCACTATTCAA	TCAGGATCCTGACGCAAAAGGT	25	22	60.222	61.941	40	50	331
1872	LInD4-331	Chr04	25208835	21822761	22761584	both	ATCATGCCCCCAAGTAGACCAG	GGACTAGTCTGGCTTCGGGTTT	22	22	61.825	61.995	54.545	54.545	307
1873	LInD4-332	Chr04	25224880	21844076	22782884	both	CGTGGGCAAACAAGGCTTGTAA	AATCTGGTGACATTGGGGGTGG	22	22	62.159	62.561	50	54.545	305
1874	LInD4-333	Chr04	26020746		23389867	Nip./MH63	AGAAAGATCTGTCCCTGTGCCA	AGATGAACGGTCAAACATGTGCT	22	23	61.36	61.057	50	43.478	338
1875	LInD4-334	Chr04	26089341	22713959		Nip./ZS97	GGCCACATGCATACGGTGTTTT	CGGTCCGATACTACCACTGGTG	22	22	62.29	62.149	50	59.091	319
1876	LInD4-335	Chr04	26312841	22937202	23681029	both	TAAGCCCGCAGTCTCCCATTTT	ACCTGTTACTCCCTCCGTTCAA	22	22	62.278	61.023	50	50	306
1877	LInD4-336	Chr04	26357886	22982350		Nip./ZS97	AATTTCAACAATGGTGCCCGGG	GCTGCCGTTTTATTAATTTGGGGA	22	24	62.252	60.382	50	41.667	350
1878	LInD4-337	Chr04	26962005	23587080	24340957	both	TTCCCGCTGCTCCGTTCTGA	CCAACAGCGGAGACCCATTCTA	20	22	63.958	62.059	60	54.545	301
1879	LInD4-338	Chr04	27228292	23853499	24601081	both	GGCCATGTGGAGCAGAGCATAG	GGCATCCAGTTTTTCTCCTCGC	22	22	63.33	62.082	59.091	54.545	300
1880	LInD4-339	Chr04	27364332	23976883	24723602	both	CACCTCCGGCCTATCTCCTCT	TTAAGTTCACCAGCCGTCCC	21	20	62.218	62.25	59.091	54.545	334
1881	LInD4-340	Chr04	27394554	24006987	24754289	both	TGGGTCGGAAAAGTCTAGCTCC	ACGTAGTGTGTACGGTCGTACG	22	22	61.733	62.041	54.545	54.545	335
1882	LInD4-341	Chr04	27395584	24008064	24755366	both	TGGACTCATTATGATCTAACCTGGC	AGTGGTCAAACGTTGCAAGCAA	25	22	60.222	62.032	44	45.455	303
1883	LInD4-342	Chr04	27436788	24045508	24793713	both	CCTCTCAGGAAGTGGCTCCATC	GCTGCAGTTCAAGTCAAGGCTT	22	22	62.124	61.904	59.091	50	327
1884	LInD4-343	Chr04	27471940	24080611	24828816	both	TGAGCCGATACATTAGGGCCAA	ACCCGCGAACTAGTCCAGTATC	22	22	61.552	61.585	50	54.545	338
1885	LInD4-344	Chr04	27533318	24141884	24890068	both	TCGATCTACGATCTGCTCACACT	CCGGACGGCGATAGTAAATCGT	23	22	60.99	62.512	47.826	54.545	344
1886	LInD4-345	Chr04	27567048	24181991	24930171	both	GGGACTGGATTGTGACTTGGGA	TGGAATCCAAGGACTGTTTGCA	22	22	61.952	60.424	54.545	45.455	334
1887	LInD4-346	Chr04	28047587	24697560		Nip./ZS97	AAACCAACCCCTTTCTCCCTCC	ACCTCACCATGCTTGCACCTAT	22	22	62.173	62.023	54.545	50	318
1888	LInD4-347	Chr04	28168415	24818235	25084329	both	TCGGATTAAGGTGGCATAGGGC	AGCAACGGGATATAGGCTGTGT	22	22	62.2	61.548	54.545	50	334
1889	LInD4-348	Chr04	28261141	24913897	25179966	both	AGTTACACGACGCGATCAGTCA	CTCCCTGGTGCTGCTAGTTTCT	22	22	62.009	62.002	50	54.545	349
1890	LInD4-349	Chr04	28275661	24937256	25203343	both	TGCATCGACGCAAGAAAGAACC	CCAAGCTCATCACCCTCCTCTT	22	22	62.001	61.752	50	54.545	340
1891	LInD4-350	Chr04	28310540	24984787	25250882	both	CTCCCCCTGACTGACGTTATCG	TCCACTTACTTCTCGCCGAGTG	22	22	62.154	62.024	59.091	54.545	333
1892	LInD4-351	Chr04	28400925		25333100	Nip./MH63	GCGTCAAACATTTTAGGATGGAGGG	GCGTGCCAAACTTTACCTTGGA	25	22	62.392	61.902	48	50	349
1893	LInD4-352	Chr04	28519185	25185357	25451653	both	CCTGCAGCGAGGAGAAAAGAGA	CTTTCAGGCCACGTCTTGATGG	22	22	62.301	61.764	54.545	54.545	321
1894	LInD4-353	Chr04	28548144	25221720	25488011	both	GATGGTGGCGATGAACCTGAGT	CAGCAATCGTGGCCAGTGAC	22	20	62.633	61.916	54.545	60	327
1895	LInD4-354	Chr04	28557006	25238347	25504641	both	GCCAGATGACAAGTACAGGCAG	ACGCTCCAAACATGTGCCTTTT	22	22	61.255	61.854	54.545	45.455	321
1896	LInD4-355	Chr04	28716420	25353717	25620015	both	GGGTACGTGTTACTCCATCCGT	CGGATCCTCTCACCTTCATCCC	22	22	61.783	61.926	54.545	59.091	318
1897	LInD4-356	Chr04	28728833	25366162	25632445	both	ACTGACATGGCAGTACTAGAGCA	ATTCTCTATACTCACTCCGTCCCA	23	24	61.131	60.141	47.826	45.833	314
1898	LInD4-357	Chr04	28760111	25398676	25664959	both	TCGATGTAGGTAGAGGGACACCA	TTTGTACTGCGCGTGTTAGCTT	23	22	61.97	61.374	52.174	45.455	326
1899	LInD4-358	Chr04	28766130	25418320	25684610	both	CCCAGGGCAGCAATGAATGAAA	GCAAGTGTGTCCCATCATCACA	22	22	61.738	61.135	50	50	344
1900	LInD4-359	Chr04	28813159	25463980	25730275	both	GCCTCCCACAACCATCCTTCTA	GCACATGCAAAGTGTCGTGAGT	22	22	61.754	62.194	54.545	50	349
1901	LInD4-360	Chr04	28831351	25484138	25750442	both	ACCACCATTGCCGCTACATCTA	AGGGGGAGAGGAGAACAGATCA	22	22	61.807	61.722	50	54.545	315
1902	LInD4-361	Chr04	28900015	25555196	25821501	both	GCGGCATCACATGTATCCTTGG	ACTGCTCCCTCCATCCCAAAAT	22	22	61.955	61.712	54.545	50	311
1903	LInD4-362	Chr04	28914187		25835737	Nip./MH63	GGTGTGAGTTTTTGTTGCATTGGT	CCCACAAGAACTAAAAACACCGGA	24	24	61.155	61.462	41.667	45.833	329
1904	LInD4-363	Chr04	29026336	25706055	25972380	both	TGCCTGCCATTTTCATATGACCA	GCAGTTACGGTGTGATGGCATT	23	22	60.881	61.77	43.478	50	348
1905	LInD4-364	Chr04	29049305	25666850	25933163	both	CGGCTTGCTGCAATGAAGTACT	ACTGCTATTCCCTCCGTCCAAC	22	22	61.764	62.06	50	54.545	308
1906	LInD4-365	Chr04	29071731	25777148	26043468	both	TAACCACATGATTACGGCCCCG	GACGGAGGAGGCTAGTGATTGG	22	22	62.696	62.17	54.545	59.091	305
1907	LInD4-366	Chr04	29129125	25831980	26098270	both	CCATCCGATCCCCATCTCTGTC	GCCGATGGGTGCTTTAACCTTC	22	22	61.991	62.088	59.091	54.545	335
1908	LInD4-367	Chr04	29151080	25854174	26120465	both	CGTGGTAACCGTGAAAAACC	GTCGAGGCTAGGAAGGTTCTG	20	21	61.876	62.105	50	59.091	319
1909	LInD4-368	Chr04	29185869		26159634	Nip./MH63	CGATGGGCCCTCTAAGCTATGT	TGCCCGAAGAAGTACGTTTTCA	22	22	61.673	60.483	54.545	45.455	329
1910	LInD4-369	Chr04	29207659	25918381	26184686	both	TCCGCCAGTAAACTGTGAGACA	TGATTCAGGCTCTTGCGGAGTT	22	22	61.6	62.258	50	50	335
1911	LInD4-370	Chr04	29264731		26283030	Nip./MH63	GCAAACATCCGATGTGACAGGG	GTGAAGCTTTGAACCAGGCTGG	22	22	62.081	62.222	54.545	54.545	302
1912	LInD4-371	Chr04	29306183		26318152	Nip./MH63	TCTGATCAGCCAACAGCCATCA	CCATCACCAGTACGCATGCATG	22	22	62.011	62.198	50	54.545	333
1913	LInD4-372	Chr04	29311413	26057513	26323397	both	AGTACTCACTGTCACAGGCTCG	CCTACTACCAGCAGAGATCGCC	22	22	61.71	61.967	54.545	59.091	339
1914	LInD4-373	Chr04	29377667	26091408		Nip./ZS97	TCACTCTCCTCACTTTAATCGAGCT	CTTGGGAGGGAGGGGGTATAGA	25	22	61.327	61.862	44	59.091	349
1915	LInD4-374	Chr04	29459981	26155687		Nip./ZS97	GTCGTTCGGCTTGTCAAAGACC	TAGACCATGAGAGCGAACGTGG	22	22	62.239	62.088	54.545	54.545	306
1916	LInD4-375	Chr04	29665174	26362038	26757737	both	AGGGTCTATGCATTGGCTTCGA	ACATAACCAGCCATGTGCAGTG	22	22	61.811	61.461	50	50	307
1917	LInD4-376	Chr04	29750759	26411548	26807248	both	AATCGGGATCGTCCATCGTTGA	ACGTCTTGGAGTCCGTGCTATG	22	22	61.851	62.345	50	54.545	301
1918	LInD4-377	Chr04	30190837	26786131	27245540	both	TCACTCGAGTGGCAAAGTTCCA	TAATGTCCTTGCCAGGTCAGCA	22	22	62.121	61.951	50	50	314
1919	LInD4-378	Chr04	30207811	26815983	27263053	both	AATTGCACGAAGTCACGAACGT	ACCGATCAACATCTAGACGCGT	22	22	61.62	61.833	45.455	50	306
1920	LInD4-379	Chr04	30294509	26913250		Nip./ZS97	TCGAGCAAGTCTAGAAGAACAAGGT	AGAGCAGGTACAATAGCAGGCT	25	22	61.728	61.223	44	50	346
1921	LInD4-380	Chr04	30611268		27630153	Nip./MH63	CAGTAAAATAGAGTCCCTGGGAACA	TCATTAGGATTAGGCCCTCCGG	25	22	60.046	61.092	44	54.545	308
1922	LInD4-381	Chr04	30646074	27222282		Nip./ZS97	CCCGTTCGAGTTCATGATTTGTGT	AAAGGGGGCCTAAATCCTCACA	24	22	61.856	61.379	45.833	50	333
1923	LInD4-382	Chr04	30691669	27244084	27691737	both	ACACGATCTCAGGTGCTCAGAA	TGAGCTACCATATCACCAGCGA	22	22	61.403	61.015	50	50	344
1924	LInD4-383	Chr04	30793723	27338935		Nip./ZS97	TAGAGTCCTACCCGAATTAGCCTT	GTTTGGGCGTAGAAACCATGCA	24	22	60.387	61.967	45.833	50	300
1925	LInD4-384	Chr04	30859506	27415251		Nip./ZS97	ACTCCGTACCCAGATATCCCAGT	ATCGCAGCACGTTAATTAGCCG	23	22	62.05	61.928	52.174	50	318
1926	LInD4-385	Chr04	30859749	27415445		Nip./ZS97	AACTCCGCAACTGTAGGAAGGG	ACACGGAGTCACGGAGAGTAAC	22	22	62.255	61.703	54.545	54.545	307
1927	LInD4-386	Chr04	30938826	27495008	27939775	both	CCACCGATGGGAAATGGCAAAA	CGACGCAGGGTGCTGTACTATA	22	22	61.991	61.893	50	54.545	337
1928	LInD4-387	Chr04	30994843	27551087	27995864	both	ATGTACAGGACAAGTGGGACGG	CACCCCCTCCTGCTAGATAGGA	22	22	61.993	62.178	54.545	59.091	341
1929	LInD4-388	Chr04	31031275	27607656	28032312	both	ACCCACGATTATAGCTGCTGTGT	TTGTGAAATAGCATGCACGCCA	23	22	62.007	61.712	47.826	45.455	331
1930	LInD4-389	Chr04	31032071	27608514	28033169	both	AAGTCCGCCACCATCGTACTTT	TAGCATGTCACTCATCAGGCGC	22	22	62.25	62.985	50	54.545	302
1931	LInD4-390	Chr04	31035420	27611723		Nip./ZS97	CAGTGACTGATTGAGCTGCTGC	TGTGGTTGTGGAGTAGCCTAGC	22	22	62.067	61.993	54.545	54.545	345
1932	LInD4-391	Chr04	31057608	27637377	28062021	both	TGAGCGCCACACATTCAACAAA	GATCGGCCGGTGAAACAAGTAC	22	22	61.839	61.81	45.455	54.545	344
1933	LInD4-392	Chr04	31061206	27641002		Nip./ZS97	TGCGATTCTTTCTTGGGTGTGA	ATGTGAGCCTGTGAGCAAATGC	22	22	60.486	62.034	45.455	50	327
1934	LInD4-393	Chr04	31092488	27673147	28097742	both	ATGACGGTGAGGTCGACGAC	AACGAATCTAACGCCTTGCTCG	20	22	61.92	61.552	60	50	348
1935	LInD4-394	Chr04	31113003	27696055	28120654	both	ACAGAAACGGACAGAGAGCTCC	ATGAAGGATTACGGGCAGGAGG	22	22	61.978	61.879	54.545	54.545	320
1936	LInD4-395	Chr04	31115791	27698792	28123391	both	ATGATAGTGATGGCGGACACCC	CTGCCATCCGGTGACAGAAAAC	22	22	62.192	62.016	54.545	54.545	321
1937	LInD4-396	Chr04	31221684	27812029	28242209	both	ACAGTTGAGCGAACGTCCAAAC	ATGCGCCCAAAATCGTTCTAGC	22	22	61.874	62.142	50	50	319
1938	LInD4-397	Chr04	31316638		28342810	Nip./MH63	CGCAGTGCCCAACTTGTTTAGT	AATCCTGCATACAACAACCGCG	22	22	61.896	62.076	50	50	324
1939	LInD4-398	Chr04	31432651	28008475		Nip./ZS97	TCCCACAAATCAGATGGCTCCC	AGACCACACCTTCGAGAAGCTC	22	22	62.35	61.978	54.545	54.545	346
1940	LInD4-399	Chr04	31445980		28477191	Nip./MH63	AAGGCTGCAGCTTTCCTCAGTA	ACCTGACGATGAGATGGCGAAA	22	22	61.945	62.048	50	50	325
1941	LInD4-400	Chr04	31466622		28498653	Nip./MH63	GCTAGCTAGCGTGGAAGGAGAA	CCCTTCTCTTGACATAGGCCAGT	22	23	61.846	61.708	54.545	52.174	326
1942	LInD4-401	Chr04	31468166	28042936	28500230	both	GTAGTGGTCCACTCGATCGGTC	CGTCCACGTACGTTGTTGTGTT	22	22	62.139	61.857	59.091	50	335
1943	LInD4-402	Chr04	31612897		28666830	Nip./MH63	CATTTCATGCACACACAGCTGC	GGACAACGTATTGGGCAATGGG	22	22	61.488	62.098	50	54.545	318
1944	LInD4-403	Chr04	31677801	28396666		Nip./ZS97	ATTGGCAATTTGTCCGTGGCAT	GGCAGAGATTGGTGGAAACTGG	22	22	61.996	61.461	45.455	54.545	311
1945	LInD4-404	Chr04	31821985		28935165	Nip./MH63	TGGAATCGATTGTTGGGGCTGT	CAGCCATGTCAAGCCATATGCA	22	22	62.541	61.591	50	50	350
1946	LInD4-405	Chr04	31822155		28935300	Nip./MH63	ATGGCTTGACATGGCTGGATCT	ACATCTTCAGTGACGTTGGGGT	22	22	62.094	61.875	50	50	345
1947	LInD4-406	Chr04	31881957		28982201	Nip./MH63	CTTGACCTGCAGTGGATCTC	TCCTACGGTGACTCTTGGTT	20	20	62.001	62.238	54.545	54.545	304
1948	LInD4-407	Chr04	31957665	28634722		Nip./ZS97	GACAGCCCGTGGAGCTCAATA	GCTTGCAGTCGTCAGGTTGATC	21	22	62.174	62.06	57.143	54.545	337
1949	LInD4-408	Chr04	31966002		29050024	Nip./MH63	TCTTTCTGCTTCTTCTCTTCAGCCT	CGGCAGTAGAAATGAGCAGCTG	25	22	61.975	61.875	44	54.545	346
1950	LInD4-409	Chr04	31998496	28674957	29081751	both	ACCTGCCAAAGTGCCAATTAGC	ACGACACATTGACACACGGAAA	22	22	61.986	60.996	50	45.455	347
1951	LInD4-410	Chr04	32009288	28685793		Nip./ZS97	TGTGCAGTGGATTCCCTTTTGT	ATGCCCTTCGTTTCTTGCGATG	22	22	60.689	62.081	45.455	50	342
1952	LInD4-411	Chr04	32156418	28785057		Nip./ZS97	GTCAGCGACGAGGAAAGAATGC	AACACTCGATGGACCCCGAAAA	22	22	62.109	62.195	54.545	50	347
1953	LInD4-412	Chr04	32161615		29191095	Nip./MH63	GAAGTGCGCGAGATTCACAGTC	ACTTGAGTGGCATGCAGAATGA	22	22	62.099	60.554	54.545	45.455	321
1954	LInD4-413	Chr04	32329052	28944599		Nip./ZS97	AGTGTAACCCGTCGTACGAGTT	CGGTGTAAACTAATGGGTCCACC	22	23	61.386	61.177	50	52.174	345
1955	LInD4-414	Chr04	32369024	28984146		Nip./ZS97	ATTCGATGTGACACGCCGAAAC	CAGCTTCTGGCAGTTCATCAGC	22	22	62.051	62.078	50	54.545	348
1956	LInD4-415	Chr04	32444890		29443097	Nip./MH63	TGTCTTCCTCCTCCCCTCTGAA	GAGGAGAGAGGAGGGGGATGAT	22	22	61.92	61.919	54.545	59.091	316
1957	LInD4-416	Chr04	32660743	29276363		Nip./ZS97	CTGCAAATGACCATTTACCTTTGGG	AATTATACCCTTTGCCGCCTTGC	25	23	61.084	62.055	44	47.826	300
1958	LInD4-417	Chr04	32863074	29490739	29829838	both	TCTTCCCCCACACAAATTTTCTCT	TTAGACGTTGTTAGGCCCTCCG	24	22	60.387	62.041	41.667	54.545	319
1959	LInD4-418	Chr04	33071847	29676694	30015594	both	TCCACCACGATTCCCCCTTTAC	GACTCTTGGCACTGCAGGAGAT	22	22	62.011	62.318	54.545	54.545	341
1960	LInD4-419	Chr04	33165035	29769647	30108546	both	GCCCATAATTGGTTGTCGCACA	AGTGGGGCCAGAAAAATGGAGA	22	22	62.032	61.909	50	50	325
1961	LInD4-420	Chr04	33201646	29806897	30145793	both	AGAACCCTCAACATGCCCTAGC	ATTGGCGTCAGTTCTTCCTCGA	22	22	62.338	61.983	54.545	50	311
1962	LInD4-421	Chr04	33255009	29847914		Nip./ZS97	CCTGGGATCAGTGGTAACCGTT	ACACACATGTCCTTCTCACCGT	22	22	62.004	61.865	54.545	50	307
1963	LInD4-422	Chr04	33323317		30267481	Nip./MH63	ACTAAGAGCACCCGCAATGGTA	AGCTACAGGACCACAAGGATCG	22	22	61.741	61.793	50	54.545	347
1964	LInD4-423	Chr04	33324515	29890202		Nip./ZS97	GTCGTCCCTGCTGGCAATTTAC	TTCGTGGAGTGTGGAGCTAAGG	22	22	62.077	61.983	54.545	54.545	319
1965	LInD4-424	Chr04	33352729	29918575	30297023	both	AAGGGTTGGAGGGAGCTAGCTA	TTGACAGAGTACAACGCAGCAA	22	22	62.323	60.74	54.545	45.455	338
1966	LInD4-425	Chr04	33412025		30346539	Nip./MH63	TGCCTGCATTTGATGAAATCCGA	TTTGACAGGGCTAGCTCTTCCC	23	22	61.435	62.009	43.478	54.545	312
1967	LInD4-426	Chr04	33642387	30190839		Nip./ZS97	GGCACAAATTAAGAGTGTTCCACCA	AGGCTTGAACAATCGGGATCCA	25	22	61.954	62.018	44	50	343
1968	LInD4-427	Chr04	33665691	30222537	30601006	both	CGTCACTGTGAGGTGAGTTCCT	TGCCTTCCCTAAGTTTACGCCA	22	22	61.911	61.943	54.545	50	313
1969	LInD4-428	Chr04	33682626	30239497	30617966	both	TCAATTCATTGTGCTCCCAGCC	CTGCTGTTGCTGCTTCTGTTCT	22	22	61.468	61.641	50	50	324
1970	LInD4-429	Chr04	33722527	30279739	30657180	both	AGGGCAAAGTAACGTCTTCCTGT	AAGATTCTGACACATGCTGCCG	23	22	62.078	61.511	47.826	50	324
1971	LInD4-430	Chr04	33764361	30324421	30701813	both	TTCTTCCAGCACTGAAACACGC	TGTCACACTGGTGTTCGTAAGGT	22	23	61.886	61.998	50	47.826	329
1972	LInD4-431	Chr04	34058851	30624387	31001818	both	ATCTCAGACCACACACAGCACA	GGAGTACTCTCTCCGTCCCACA	22	22	61.868	62.592	50	59.091	310
1973	LInD4-432	Chr04	34127240	30692044	31069536	both	GTCCAGCTGAAGAGGGAGAGTG	CCCCTTCTCAATCTCTGGAGTGG	22	23	62.047	62.015	59.091	56.522	314
1974	LInD4-433	Chr04	34267996	30834643	31200020	both	GCTCCTTCTGCTCGTACAGACA	CAATCCCATTGACCGCTGCTTC	22	22	62.028	62.4	54.545	54.545	341
1975	LInD4-434	Chr04	34324495	30890368	31255741	both	GCAGAAGTAGGTCGCAGCAGTT	GCTCCGAAATGGTTGGGGTTTT	22	22	63.111	61.927	54.545	50	349
1976	LInD4-435	Chr04	34372561		31303831	Nip./MH63	TAATAGGCATGGGCGGAGTCAG	CGACTGTGTCATCCCAGTACCT	22	22	61.931	61.467	54.545	54.545	316
1977	LInD4-436	Chr04	34382476	30953541	31318964	both	TCACCCAGTGAAGAAGGTAAGGA	GAAGTCTAGCAGCAAAGCAGCC	23	22	60.696	62.075	47.826	54.545	347
1978	LInD4-437	Chr04	34407854	30978965	31344387	both	AGCATCCTCTGGTGGAAAGGTC	TCACCACCACACAAGCTCTACC	22	22	62.013	62.188	54.545	54.545	301
1979	LInD4-438	Chr04	34464344	31039620	31405041	both	TTGGCTCCGATGAGTCGTTTCT	ATAGACCACCCGAGCAACCTTC	22	22	61.983	62.06	50	54.545	318
1980	LInD4-439	Chr04	34488837	31064445	31429915	both	GCTCGATCAGCGTATGTTGCAT	ACACCCATGATTTACGGGCCTA	22	22	61.682	61.494	50	50	328
1981	LInD4-440	Chr04	34508381	31083709	31449197	both	CGCGAGGGAGAGATTCTGTTCC	CTCAATGGCAAGAGCACCCATG	22	22	62.717	62.099	59.091	54.545	331
1982	LInD4-441	Chr04	34675003	31243839	31609329	both	TCTGCCATGACTCTTCACCACG	CGGAAAATGTTCGCACGCAAAG	22	22	62.552	62.019	54.545	50	343
1983	LInD4-442	Chr04	34711782		31644357	Nip./MH63	TCTACGGTCCAAACTATCTCCCT	GTCCACCGCTTGCTGCTTAATT	23	22	60.053	62.027	47.826	50	302
1984	LInD4-443	Chr04	34724616	31291629	31657197	both	GTCCCGAACTTCCAATCTTGCC	AGCAGCATTGACTCGGTCTTCT	22	22	61.771	61.991	54.545	50	314
1985	LInD4-444	Chr04	34730871		31663441	Nip./MH63	CGATTAGAGGGAGAGACGAGCG	CTCTGCTCGTCTACTCTCGTCG	22	22	61.997	61.914	59.091	59.091	344
1986	LInD4-445	Chr04	34805155	31389999	31755616	both	TGCTGATCTGCTCATCAATG	TCCAAACATCCGATGTGATAG	20	21	61.328	61.427	50	45.833	340
1987	LInD4-446	Chr04	34819499	31404349	31769966	both	CGTGTGCATATTCCATCCGCAA	TGCTTGATTGGGTTGTGTTCGG	22	22	61.885	61.905	50	50	316
1988	LInD4-447	Chr04	34833979	31418853	31784463	both	TTTCCTTGACGGTTCTGGTGGT	TGTCCATGAACACAGACAGGCT	22	22	62.077	61.878	50	50	303
1989	LInD4-448	Chr04	34846397	31431250		Nip./ZS97	ACACTACATGCACCGGAAACTC	TGATACCCGGTTTTGCCTAGCA	22	22	60.87	62.01	50	50	307
1990	LInD4-449	Chr04	34846734	31431642		Nip./ZS97	TCGGTTTTTCTCTGGTTCTTCTGT	GCGGCGGCTAATACTACTAGGA	24	22	60.384	61.454	41.667	54.545	329
1991	LInD4-450	Chr04	34859185		31817115	Nip./MH63	GATGCCGTAACAGCTTCGTCTG	CGAACATCCTGCTGCTACTCCT	22	22	61.858	62.108	54.545	54.545	340
1992	LInD4-451	Chr04	34869854	31454555		Nip./ZS97	TATTCCTCTCCTCTCACGTGCG	ACTTCAAAATGCTGTCCTCCGT	22	22	61.579	60.487	54.545	45.455	307
1993	LInD4-452	Chr04	34929498	31535066	31851225	both	CTCCTGCTACTCCCTCCGTTTT	CGACGCGATGGATGGAGATAAC	22	22	61.737	61.232	54.545	54.545	316
1994	LInD4-453	Chr04	35030749	31637951	31954089	both	GTTACGCGTACCTCTGTCCT	CATCCACAAGATTGGCCGTTCC	20	22	62.02	62.092	54.545	54.545	320
1995	LInD4-454	Chr04	35079149	31686725	32002866	both	CATACATAGCAGGCACACGCTC	GTAGTACCGTGCAGTGCCTAGG	22	22	61.682	62.405	54.545	59.091	326
1996	LInD4-455	Chr04	35081923	31689442	32005582	both	AGAGAGTTTGGTGGTCTCGTCG	GCCAGCTACAGTACGGACTCAA	22	22	61.963	62.034	54.545	54.545	320
1997	LInD4-456	Chr04	35097302	31704843	32020983	both	TGGCTCGGATTCTGTGAATTCA	GTGGGGGCTTTCTCCCTATCAA	22	22	60.027	61.764	45.455	54.545	349
1998	LInD4-457	Chr04	35221709	31783508	32099608	both	TGGAGAGCCCATCACCTCAATG	CTGAATGCCACGTCAATGCACT	22	22	62.078	62.019	54.545	50	350
1999	LInD4-458	Chr04	35282961		32132889	Nip./MH63	ACACATCTCCACCTGACCTCTTG	GCTGGGCCTTCATCAACACAAA	23	22	61.887	61.919	52.174	50	302
[truncated: 2,745 more rows]
