# Supplementary material for: Development of Whole-Genome Agarose-Resolvable LInDel Markers in Rice
Source: Rice (N Y). 2020 Jan 6;13:1. doi: 10.1186/s12284-019-0361-3 (PMC6944724; doi:10.1186/s12284-019-0361-3)
Supplement: Supplementary file 8 — Additional file 8. The genotype of 22 rice varieties detected by 312 LInDel markers. [file 12284_2019_361_MOESM8_ESM.xlsx]

## Sheet: 279  polymorphism markers 
Marker Name	Chromosome	ZS97 Position	MH63 Position	Zhonghua11	Zhenhan97	Minghui63	Xizang2	N22	Nipponbare	9311	02428	Teqing	Taichung65	Chuan7	Haobuka	Wuyugeng	Gangye	H360	Zidao	Heimichut	Malaixizidao	Xiushui134	AUS449	Mitak	Cypress	PIC Value in all groups	PIC Value in Indica groups	PIC Value in Japonica groups
LInD1-1	Chr01	63771	47425	1	2	1	2	2	1	1	1	1	1	2	1	2	2	2	1	2	2	1	2	1	1	0.495868	0.42	0.375
LInD1-19	Chr01	1545434	1499759	1	2	1	2	3	2	1	0	1	1	2	2	1	1	2	1	2	1	1	3	2	1	0.607438	0.64	0.541667
LInD1-28	Chr01	2735871	2657851	3	2	1	2	3	2	1	2	1	1	2	2	1	1	2	1	2	1	1	3	2	3	0.632231	0.64	0.625
LInD1-33	Chr01	4502751	4437051	1	2	1	1	2	1	1	1	1	1	2	1	1	1	2	1	2	2	1	2	1	1	0.433884	0.42	0
LInD1-41	Chr01	5691707	5302500	1	1	2	1	1	1	2	1	1	1	1	1	1	1	1	1	1	1	1	1	1	1	0.165289	0.32	0
LInD1-58	Chr01	6459774	6158274	2	1	2	2	1	2	2	2	2	2	1	1	2	1	1	2	2	2	2	1	1	2	0.46281	0.5	0.375
LInD1-60	Chr01	8321532	8341481	1	2	1	1	2	1	2	1	1	1	2	1	1	1	1	1	1	2	1	2	1	1	0.4	0.48	0
LInD1-62	Chr01	8513112	8553361	2	1	2	2	1	2	2	2	1	2	1	2	2	2	1	2	1	1	2	1	2	2	0.46281	0.32	0
LInD1-69	Chr01	10176874	9916450	1	1	2	1	1	1	2	1	2	1	2	1	1	1	1	1	2	2	1	1	1	1	0.396694	0.48	0
LInD1-72	Chr01	11952466	11746736	0	1	2	0	2	0	1	0	1	0	2	0	0	0	2	0	1	1	0	2	2	1	0.644628	0.5	0.291667
LInD1-79	Chr01	13401457	13332817	3	1	2	1	2	3	2	3	0	3	2	3	3	3	2	3	2	1	3	1	3	3	0.640496	0.47	0.152778
LInD1-89	Chr01	14912156	14861137	1	1	2	1	1	1	1	1	3	1	1	1	1	1	1	1	2	0	1	1	1	1	0.318182	0.45	0
LInD1-91	Chr01	16412690	16597888	4	1	3	5	4	3	2	1	1	1	1	3	3	2	1	2	3	5	3	1	1	1	0.72314	0.68	0.736111
LInD1-93	Chr01	17626127	17910456	2	1	2	2	2	2	1	2	1	2	2	2	2	2	2	2	1	2	2	1	2	2	0.35124	0.5	0
LInD1-110	Chr01	18950066	19243706	1	2	1	0	0	1	2	1	0	1	0	1	1	1	1	1	2	1	1	1	1	1	0.483471	0.66	0.152778
LInD1-124	Chr01	20626863	21603611	1	2	1	1	1	1	2	1	2	1	1	1	1	1	1	1	2	1	1	1	1	1	0.297521	0.48	0
LInD1-132	Chr01	22071613	23101001	1	1	2	1	1	1	1	1	1	1	1	1	1	1	1	1	1	1	1	1	1	1	0.0867769	0.18	0
LInD1-142	Chr01	23479517	24528794	1	1	2	1	1	1	1	1	1	1	1	1	1	1	1	1	1	1	1	1	1	1	0.0867769	0.18	0
LInD1-147	Chr01	26263507	27416955	2	1	2	2	2	2	2	2	1	2	2	0	2	2	2	2	2	1	2	2	2	2	0.309917	0.42	0.152778
LInD1-152	Chr01	28162266	29080919	1	1	2	1	1	1	2	1	2	1	1	1	1	1	1	1	1	2	1	1	1	1	0.297521	0.48	0
LInD1-166	Chr01	28806415	29729915	1	1	0	1	2	1	0	1	0	1	2	2	1	2	2	1	0	0	1	2	1	1	0.623967	0.58	0.277778
LInD1-190	Chr01	30256201	31264386	1	1	2	1	2	1	2	1	2	1	2	0	1	0	2	2	2	2	1	2	2	2	0.561983	0.18	0.569444
LInD1-203	Chr01	31619442	32332540	2	2	1	2	1	2	1	2	1	2	1	2	2	2	1	2	1	1	2	1	2	2	0.483471	0.18	0
LInD1-226	Chr01	32983122	33685090	2	2	1	1	1	2	1	2	1	2	1	2	2	2	1	1	1	1	2	1	2	1	0.495868	0.18	0.375
LInD1-234	Chr01	34288333	34919283	1	2	1	1	1	1	2	1	1	1	2	1	1	1	1	1	1	1	1	1	1	1	0.235537	0.42	0
LInD1-241	Chr01	36027978	36513347	1	2	1	1	1	1	2	1	1	1	1	1	1	1	1	1	2	1	1	1	1	1	0.235537	0.42	0
LInD1-242	Chr01	36674317	37135401	2	2	1	2	3	2	2	1	1	1	3	2	2	2	3	0	2	1	2	3	2	1	0.640496	0.66	0.486111
LInD1-250	Chr01	39367236	39845522	1	1	2	1	1	1	1	1	2	2	1	2	1	2	2	2	2	2	1	2	2	2	0.495868	0.48	0.5
LInD1-256	Chr01	40081205	40665078	2	2	1	2	2	2	1	2	1	1	2	2	2	2	2	2	1	1	2	2	2	1	0.433884	0.5	0.277778
LInD2-1	Chr02	29273	3223	1	2	1	1	2	1	1	1	1	2	1	1	1	1	2	1	1	2	1	2	1	1	0.396694	0.5	0.152778
LInD2-7	Chr02	1028786	1000925	1	2	1	1	1	1	2	1	2	2	1	1	1	1	1	1	2	1	1	1	1	1	0.35124	0.48	0.152778
LInD2-18	Chr02	2726983	2668861	1	2	1	1	2	1	2	1	2	1	1	1	1	1	1	1	1	2	1	3	1	1	0.417355	0.58	0
LInD2-26	Chr02	4200872	4232908	1	2	1	1	3	1	2	1	2	1	1	1	1	1	1	1	1	2	1	2	1	1	0.417355	0.58	0
LInD2-33	Chr02	4842607	4831527	5	4	3	3	7	3	5	4	6	3	5	4	3	2	1	4	2	3	1	1	3	4	0.799587	0.84	0.694444
LInD2-36	Chr02	6064148	6067260	2	1	2	2	2	2	2	2	2	2	2	2	2	2	2	2	2	1	2	2	2	2	0.165289	0.32	0
LInD2-41	Chr02	6820200	6895075	0	2	1	1	1	0	3	2	3	0	1	1	0	0	1	1	2	3	0	0	1	1	0.694215	0.61	0.569444
LInD2-43	Chr02	8494360	8213047	1	2	1	1	1	1	1	1	2	1	1	2	1	1	1	2	2	2	1	0	2	1	0.491736	0.47	0.375
LInD2-65	Chr02	9732375	9391968	1	1	2	1	1	1	0	1	2	1	1	1	1	1	1	1	1	1	1	1	1	1	0.243802	0.31	0
LInD2-75	Chr02	12634816	12044223	5	2	4	3	2	1	2	5	2	5	2	4	1	5	2	2	3	3	4	4	3	2	0.760331	0.56	0.777778
LInD2-77	Chr02	13598629	12996737	3	2	4	3	2	1	2	1	2	4	5	3	6	1	3	1	2	2	4	2	3	4	0.77686	0.48	0.708333
LInD2-78	Chr02	14164389	13572791	1	1	2	1	1	1	0	1	1	1	1	1	1	1	1	1	1	1	1	1	1	1	0.169421	0.17	0
LInD2-80	Chr02	16278228	15722439	1	2	1	1	2	1	2	1	2	1	2	1	1	1	2	1	2	2	1	2	1	1	0.483471	0.18	0
LInD2-89	Chr02	16882701	16302246	3	2	3	3	2	3	2	2	2	3	2	1	3	0	2	3	2	2	3	2	3	2	0.578512	0.18	0.513889
LInD2-109	Chr02	18038590	17356217	2	1	2	2	3	2	4	2	4	2	1	2	2	2	0	2	3	1	2	3	2	2	0.603306	0.69	0
LInD2-115	Chr02	19362953	18717442	3	1	3	2	3	2	1	1	1	3	4	3	3	2	1	2	4	1	3	1	4	2	0.727273	0.56	0.638889
LInD2-128	Chr02	20451936	19788316	1	2	1	2	2	3	2	3	2	1	2	0	1	0	2	0	2	2	0	2	3	2	0.665289	0.18	0.736111
LInD2-136	Chr02	21105809	20377426	2	2	3	2	3	3	1	1	1	3	3	3	3	2	1	2	3	1	3	1	3	2	0.644628	0.58	0.569444
LInD2-138	Chr02	24924951	24153763	2	1	1	2	1	2	1	2	1	1	1	2	1	2	1	1	1	1	2	1	1	1	0.433884	0	0.486111
LInD2-140	Chr02	28558188	28327419	1	2	1	1	1	1	1	1	1	1	1	0	1	1	0	1	1	1	1	1	1	1	0.243802	0.17	0.152778
LInD2-141	Chr02	29961251	29480960	1	1	2	1	0	1	1	1	1	1	0	1	1	1	1	1	1	1	1	0	1	1	0.309917	0.54	0
LInD2-153	Chr02	31305819	30856401	1	1	0	1	2	1	1	1	1	1	2	1	1	1	2	1	1	1	1	2	1	1	0.367769	0.47	0
LInD2-155	Chr02	32908870	32349696	1	2	3	4	1	2	5	2	3	3	6	6	6	4	2	0	2	2	2	1	2	4	0.789256	0.74	0.777778
LInD2-159	Chr02	33900648	33288650	0	2	1	0	1	0	2	0	1	0	1	0	0	0	2	2	1	1	1	1	0	0	0.628099	0.42	0.291667
LInD2-162	Chr02	34715230	34099631	1	2	1	1	2	1	2	1	1	1	1	1	1	1	2	1	2	2	2	2	1	1	0.46281	0.42	0.152778
LInD2-165	Chr02	35103642	34499789	1	1	2	1	1	1	2	1	1	1	1	1	0	1	1	1	1	2	1	1	1	1	0.309917	0.42	0.152778
LInD3-3	Chr03	381460	322788	1	1	2	1	1	1	2	1	2	1	1	1	1	1	2	1	2	2	1	1	1	1	0.396694	0.48	0
LInD3-9	Chr03	2071104	1774753	0	2	1	3	1	4	0	4	0	4	5	5	4	6	2	2	2	1	5	1	2	3	0.834711	0.7	0.791667
LInD3-14	Chr03	3690773	3414121	3	1	2	3	1	3	2	3	2	3	1	3	3	3	2	3	1	2	3	2	1	1	0.644628	0.48	0.277778
LInD3-15	Chr03	5839065	5560984	2	2	1	2	3	0	1	2	1	2	3	2	2	2	2	2	2	2	2	3	2	2	0.495868	0.66	0.152778
LInD3-19	Chr03	6007172	5738164	2	1	2	2	0	2	0	2	1	2	0	2	2	2	3	0	1	1	2	0	2	2	0.615702	0.66	0.152778
LInD3-34	Chr03	9282638	9083895	3	0	1	2	1	3	1	2	2	3	2	2	2	2	1	3	2	1	2	2	2	2	0.615702	0.47	0.444444
LInD3-44	Chr03	10209435	9969392	1	2	1	1	1	1	2	1	2	1	1	1	1	1	1	1	1	0	1	1	1	0	0.376033	0.41	0.152778
LInD3-46	Chr03	12313587	11737826	0	0	1	2	3	1	4	2	0	2	2	0	0	2	4	0	3	4	2	3	0	0	0.747934	0.76	0.569444
LInD3-49	Chr03	12798431	12464265	3	0	1	2	0	3	0	3	1	3	1	1	3	3	2	2	3	3	3	1	3	2	0.690083	0.7	0.486111
LInD3-56	Chr03	14015963	14053011	1	2	1	1	1	1	1	1	1	1	1	1	1	1	1	1	2	0	1	1	1	1	0.243802	0.31	0
LInD3-72	Chr03	15220640	15258023	1	1	2	1	1	1	2	1	1	1	1	1	1	1	1	2	1	1	1	1	2	2	0.35124	0.32	0.375
LInD3-77	Chr03	16287645	16274310	1	2	1	1	3	2	1	1	1	1	1	1	1	2	3	2	1	1	2	1	2	3	0.557851	0.46	0.569444
LInD3-85	Chr03	16938961	16835953	1	2	1	1	1	1	2	1	0	1	2	1	1	1	2	1	1	2	1	2	1	1	0.458678	0.47	0
LInD3-86	Chr03	18061057	18584794	3	1	1	4	1	2	1	3	1	1	1	3	2	3	1	3	1	1	2	1	1	3	0.607438	0	0.652778
LInD3-87	Chr03	19649466	20277899	1	2	1	1	2	1	2	1	2	1	2	1	1	1	2	1	2	2	1	2	1	1	0.483471	0.18	0
LInD3-95	Chr03	20838486	21708050	1	2	1	1	1	1	1	1	2	1	1	1	1	1	1	1	1	1	1	1	1	1	0.165289	0.32	0
LInD3-104	Chr03	22128993	23044999	0	2	1	0	1	0	2	0	2	0	2	0	0	0	1	0	2	2	0	2	0	0	0.582645	0.42	0
LInD3-110	Chr03	22803565	23670960	1	2	1	1	2	1	2	1	2	1	1	1	1	1	1	1	2	2	1	1	1	1	0.396694	0.48	0
LInD3-122	Chr03	24267682	25199945	2	0	0	2	1	2	3	4	4	4	1	2	2	2	3	2	0	3	4	1	2	2	0.743802	0.72	0.375
LInD3-127	Chr03	25217346	27176716	2	2	1	2	2	2	2	2	2	0	2	2	2	2	1	0	2	2	2	2	2	2	0.31405	0.32	0.277778
LInD3-134	Chr03	26882338	29041926	1	2	1	3	1	2	1	2	1	2	1	2	2	2	2	2	2	2	2	1	1	0	0.566116	0.48	0.513889
LInD3-147	Chr03	27868135	30346085	1	2	2	3	2	1	4	1	4	3	2	4	3	4	2	1	1	4	0	0	4	2	0.772727	0.61	0.75
LInD3-156	Chr03	28577568	31016966	2	1	2	2	2	2	1	2	1	2	2	2	2	2	2	2	1	1	2	2	2	2	0.35124	0.5	0
LInD3-167	Chr03	31098776	33861771	1	2	2	1	2	1	2	1	2	0	2	1	1	1	2	1	2	2	1	2	1	1	0.541322	0	0.152778
LInD3-168	Chr03	32466234	35483596	1	2	3	1	0	1	0	1	0	2	3	1	1	1	3	2	0	0	1	0	0	1	0.694215	0.54	0.402778
LInD3-182	Chr03	33532559	36717361	2	1	3	2	4	2	1	2	2	2	5	2	2	2	1	2	1	1	2	5	2	2	0.586777	0.68	0
LInD4-7	Chr04	1692476	1808125	1	1	2	1	1	1	2	1	2	1	1	1	1	1	1	1	1	2	1	1	1	2	0.35124	0.48	0.152778
LInD4-10	Chr04	3044752	2753989	1	1	2	1	1	1	1	1	1	1	1	1	1	2	1	1	1	1	1	1	2	1	0.235537	0.18	0.277778
LInD4-13	Chr04	3715593	3690010	1	1	2	1	2	1	2	2	2	1	2	2	1	1	2	2	1	2	1	2	2	2	0.483471	0.32	0.486111
LInD4-25	Chr04	4541200	4307201	1	2	1	1	2	1	0	1	0	1	0	1	1	1	1	1	2	0	1	2	0	1	0.566116	0.64	0.152778
LInD4-29	Chr04	5587933	5379527	1	1	2	1	1	1	1	1	1	1	1	1	1	1	1	1	1	1	1	1	1	1	0.0867769	0.18	0
LInD4-31	Chr04	6189605	5810249	3	1	2	1	2	1	1	3	1	1	1	1	3	1	2	1	2	1	1	1	0	3	0.582645	0.48	0.541667
LInD4-35	Chr04	11067244	11815522	2	2	1	2	2	2	1	2	1	2	2	2	2	2	2	2	2	1	2	2	2	2	0.297521	0.48	0
LInD4-40	Chr04	11636320	12480379	1	1	2	1	3	1	2	1	2	1	3	1	1	3	3	1	3	2	1	3	1	1	0.595041	0.58	0.152778
LInD4-41	Chr04	12673949	13606119	1	3	2	2	1	1	1	1	1	1	1	1	1	1	1	1	1	1	1	1	1	1	0.243802	0.34	0.152778
LInD4-44	Chr04	13314700	14140519	2	2	1	2	1	2	2	2	2	2	1	2	2	2	2	2	2	2	2	1	2	2	0.297521	0.48	0
LInD4-46	Chr04	14563507	15262906	1	2	1	1	1	1	1	3	3	1	1	1	1	1	1	3	1	3	1	1	1	1	0.367769	0.46	0.277778
LInD4-51	Chr04	15484214	16320177	1	1	2	1	1	1	2	1	1	1	2	1	1	1	2	0	0	0	1	2	0	1	0.566116	0.62	0.277778
LInD4-63	Chr04	17156743	17818863	2	2	1	2	1	2	1	2	1	2	2	2	2	2	1	2	1	1	1	1	2	2	0.483471	0.32	0.152778
LInD4-64	Chr04	18735609	19470730	2	1	2	2	2	2	1	2	2	2	2	2	1	2	1	1	2	1	2	1	2	2	0.433884	0.5	0.277778
LInD4-70	Chr04	19368329	20378195	2	2	1	2	2	2	1	2	2	2	2	2	2	2	1	2	2	2	2	2	2	2	0.235537	0.42	0
LInD4-75	Chr04	20300276	21005170	2	2	1	2	2	2	1	2	1	2	2	2	2	2	1	2	1	2	2	2	2	2	0.35124	0.5	0
LInD4-83	Chr04	21024366	21835983	2	1	2	1	2	2	2	2	2	2	2	2	2	2	1	2	1	1	2	2	2	2	0.35124	0.48	0.152778
LInD4-85	Chr04	24694295	24960587	2	2	1	2	2	2	1	2	2	2	2	2	2	2	2	2	2	1	2	2	2	2	0.235537	0.42	0
LInD4-87	Chr04	26819309	27266388	1	3	2	1	3	1	3	1	3	1	3	1	1	1	3	1	3	3	1	3	1	1	0.533058	0.18	0
LInD4-89	Chr04	27222282	27664973	1	2	1	1	1	1	2	1	2	1	1	1	1	1	0	1	2	2	1	1	1	1	0.417355	0.49	0
LInD4-95	Chr04	28379643	28660251	2	0	1	3	3	0	0	3	3	2	1	0	0	3	1	2	1	3	0	0	0	3	0.714876	0.66	0.652778
LInD4-101	Chr04	29217096	29561728	1	0	1	1	1	1	0	1	2	1	1	1	0	1	1	1	2	2	0	0	0	2	0.595041	0.66	0.486111
LInD4-102	Chr04	29847914	30199210	1	2	1	1	1	1	2	1	2	1	1	1	1	1	1	1	2	2	1	1	1	1	0.35124	0.5	0
LInD4-107	Chr04	31454538	31832668	1	2	1	1	1	1	2	1	2	1	1	0	1	1	1	1	2	1	1	1	1	1	0.367769	0.48	0.152778
LInD5-1	Chr05	16738	14110	1	2	1	1	1	1	2	1	2	1	1	1	1	1	1	1	1	2	1	1	1	1	0.297521	0.48	0
LInD5-15	Chr05	958117	962516	1	2	1	1	2	1	2	1	2	1	2	1	1	1	1	1	1	2	1	2	1	1	0.433884	0.42	0
LInD5-28	Chr05	1893188	2229567	1	1	1	1	2	1	1	1	1	1	1	1	1	1	1	1	1	1	1	2	1	1	0.165289	0.32	0
LInD5-35	Chr05	2851815	3232978	2	3	1	1	3	2	3	3	3	2	3	1	2	1	4	3	2	2	2	3	2	2	0.665289	0.58	0.569444
LInD5-42	Chr05	4151240	4655349	1	1	2	1	2	1	2	1	2	1	2	1	1	1	2	1	1	2	1	2	1	1	0.46281	0.32	0
LInD5-45	Chr05	4611807	5244175	1	1	1	1	2	1	1	1	1	1	2	1	1	1	1	1	1	0	1	2	2	2	0.417355	0.41	0.277778
LInD5-58	Chr05	5568465	6166969	2	1	2	2	2	2	1	2	2	2	1	2	2	2	2	2	2	2	2	2	2	2	0.235537	0.42	0
LInD5-65	Chr05	7693013	8174666	1	2	2	1	2	1	1	1	2	1	2	1	1	1	1	1	2	1	1	2	1	1	0.433884	0.42	0
LInD5-68	Chr05	11515807	12099249	1	3	4	1	2	1	4	1	2	1	3	3	3	1	4	3	3	3	3	2	4	2	0.727273	0.66	0.625
LInD5-70	Chr05	12863931	13662411	2	4	1	3	2	3	1	3	1	3	3	3	3	3	2	2	3	4	2	0	2	2	0.702479	0.71	0.486111
LInD5-71	Chr05	13498935	14296702	1	4	3	1	2	1	3	1	2	1	4	1	1	1	3	2	4	5	1	2	3	4	0.731405	0.72	0.416667
LInD5-74	Chr05	14577581	15684541	2	0	1	2	2	2	1	2	1	2	2	2	2	2	2	2	3	1	2	2	2	2	0.433884	0.57	0
LInD5-79	Chr05	15393532	16503298	1	2	1	1	2	1	1	1	1	1	1	1	1	1	0	1	1	1	1	2	1	1	0.309917	0.41	0
LInD5-81	Chr05	15617613	16753977	0	1	2	1	1	1	2	2	2	1	2	1	1	1	1	2	2	2	1	1	2	1	0.533058	0.48	0.486111
LInD5-82	Chr05	16903322	18160067	2	1	2	2	1	2	1	2	1	2	1	2	2	2	1	2	1	2	2	1	2	2	0.46281	0.32	0
LInD5-91	Chr05	18809601	20472624	2	1	2	2	2	2	1	1	1	2	1	2	2	2	2	2	1	1	2	2	2	2	0.433884	0.48	0.152778
LInD5-93	Chr05	19725652	21215485	2	1	2	2	1	2	2	2	2	2	1	2	2	2	1	2	1	2	2	1	2	2	0.396694	0.48	0
LInD5-98	Chr05	20568794	22193618	2	2	1	2	2	2	2	2	2	2	2	2	2	2	2	2	2	2	2	2	2	2	0.0867769	0.18	0
LInD5-99	Chr05	21482067	23171952	2	2	1	2	1	2	2	2	2	2	2	2	2	2	1	2	2	2	2	2	2	2	0.235537	0.42	0
LInD5-102	Chr05	24137888	25763766	2	1	2	2	1	2	1	1	2	1	1	2	2	0	1	2	1	1	2	2	2	2	0.533058	0.42	0.402778
LInD5-104	Chr05	24423809	26042620	1	0	1	1	2	1	0	0	1	2	2	1	1	1	0	1	0	0	1	2	1	1	0.595041	0.62	0.291667
LInD5-117	Chr05	25225253	26874271	1	2	1	1	2	1	1	2	2	2	2	1	1	1	3	1	2	2	1	2	2	2	0.541322	0.46	0.444444
LInD5-121	Chr05	26181660	27863104	2	1	2	2	1	2	2	2	2	1	2	2	2	2	2	2	1	1	2	2	2	2	0.35124	0.48	0.152778
LInD6-16	Chr06	1017212	1188795	2	1	2	2	1	2	2	2	1	2	1	2	2	2	2	2	1	1	2	1	2	2	0.433884	0.42	0
LInD6-33	Chr06	1987627	2109858	1	3	1	1	3	1	3	1	3	1	3	1	1	1	1	1	0	3	1	2	1	1	0.516529	0.53	0
LInD6-39	Chr06	2755449	3266593	2	1	2	2	1	2	1	1	1	2	1	2	2	2	1	2	1	1	2	1	1	1	0.495868	0.18	0.375
LInD6-43	Chr06	3903134	4714072	2	1	2	2	2	2	2	2	2	0	2	2	2	2	1	2	1	1	2	2	2	2	0.367769	0.48	0.152778
LInD6-50	Chr06	5225737	5874080	2	1	2	2	1	2	2	2	1	2	1	2	0	2	1	2	1	1	2	1	2	2	0.516529	0.32	0.152778
LInD6-58	Chr06	5885928	6545501	1	2	1	1	1	1	2	1	1	1	1	1	1	1	1	1	2	2	1	1	1	1	0.297521	0.48	0
LInD6-64	Chr06	6670395	7260482	2	1	2	2	2	1	2	2	1	2	2	2	2	2	2	1	1	1	2	2	2	2	0.396694	0.48	0.277778
LInD6-68	Chr06	7910705	9242054	2	2	1	1	1	2	1	2	2	1	1	2	2	1	2	1	2	2	2	1	2	2	0.483471	0.5	0.444444
LInD6-75	Chr06	8745277	10260156	1	1	2	2	2	2	2	2	1	2	2	1	2	2	2	2	1	1	1	2	2	2	0.433884	0.48	0.375
LInD6-76	Chr06	11631514	12992865	2	1	2	1	1	1	1	1	1	1	2	1	1	1	1	1	1	1	1	1	1	1	0.235537	0.32	0.152778
LInD6-79	Chr06	12799797	13942703	1	2	1	1	1	1	2	1	2	2	1	1	0	1	1	1	2	2	1	1	1	1	0.458678	0.5	0.291667
LInD6-82	Chr06	13445360	14379802	1	2	1	1	1	1	2	1	2	2	1	1	1	1	1	1	2	2	1	1	1	1	0.396694	0.5	0.152778
LInD6-91	Chr06	14507631	16016305	1	2	1	1	1	1	2	1	2	2	1	1	1	1	1	1	2	2	1	1	2	1	0.433884	0.5	0.277778
LInD6-96	Chr06	17221823	18873284	3	1	3	1	1	1	1	1	3	1	1	1	1	1	2	1	1	1	1	1	1	1	0.309917	0.46	0.152778
LInD6-98	Chr06	18071556	19717691	1	2	1	2	1	2	2	2	1	2	1	2	2	2	2	2	2	2	2	1	2	2	0.396694	0.5	0.152778
LInD6-110	Chr06	19123106	20784135	2	2	1	2	1	2	2	2	2	2	1	2	2	2	1	2	2	2	2	1	2	2	0.35124	0.5	0
LInD6-117	Chr06	19972772	21558789	3	3	2	3	3	3	3	3	3	0	3	1	3	1	3	3	3	2	3	3	1	3	0.442149	0.32	0.486111
LInD6-120	Chr06	20935229	22092700	1	2	1	2	2	1	1	1	1	1	1	2	2	2	1	2	2	1	1	1	2	2	0.495868	0.42	0.486111
LInD6-134	Chr06	21953356	23103376	1	2	2	1	0	1	0	1	0	0	0	1	1	1	1	0	0	2	1	0	0	2	0.632231	0.54	0.486111
LInD6-146	Chr06	22848498	24040695	1	1	2	1	1	1	2	1	2	1	1	1	1	1	2	1	2	1	1	2	1	1	0.396694	0.48	0
LInD6-151	Chr06	25011159	26249243	2	2	1	2	2	2	1	2	2	2	2	2	2	2	2	2	2	2	2	2	2	2	0.165289	0.32	0
LInD6-157	Chr06	26008049	27230653	1	1	2	1	1	1	1	1	1	1	1	1	1	1	1	1	1	2	1	2	1	1	0.235537	0.42	0
LInD6-163	Chr06	26602972	27803353	1	1	2	2	2	1	1	1	2	2	2	2	1	2	2	2	2	2	1	2	1	2	0.46281	0.32	0.5
LInD7-1	Chr07	94901	534139	2	1	2	2	2	2	2	2	2	1	2	2	2	2	2	2	1	1	2	2	2	2	0.297521	0.42	0.152778
LInD7-18	Chr07	1049895	1586421	1	2	1	1	2	1	1	1	1	1	2	1	1	1	1	1	1	1	1	2	1	1	0.297521	0.48	0
LInD7-42	Chr07	5745371	6347578	1	1	2	1	1	1	2	1	2	1	1	1	1	1	1	1	1	2	1	1	1	1	0.297521	0.48	0
LInD7-48	Chr07	6956103	7579361	1	1	2	1	1	1	1	1	1	1	1	1	1	1	1	1	1	1	11	1	1	1	0.171488	0.18	0.159722
LInD7-50	Chr07	7683347	8303701	2	2	1	2	2	2	1	2	2	2	2	2	2	2	2	2	2	1	2	2	2	2	0.235537	0.42	0
LInD7-59	Chr07	8511000	9154481	4	1	3	2	4	3	5	2	4	3	0	0	1	6	2	4	4	3	3	3	4	3	0.785124	0.75	0.777778
LInD7-67	Chr07	16070493	16907462	1	2	1	1	1	1	1	1	2	1	1	1	1	1	1	1	0	1	1	1	1	1	0.243802	0.31	0
LInD7-77	Chr07	18577661	19129793	2	1	3	2	0	2	3	2	1	3	0	0	2	2	1	0	1	1	2	3	2	0	0.731405	0.62	0.486111
LInD7-78	Chr07	18601310	19159790	2	1	3	2	2	2	3	2	1	1	2	2	2	2	3	1	1	2	2	2	1	3	0.595041	0.66	0.486111
LInD7-83	Chr07	20130986	21025329	2	2	1	3	2	2	2	2	2	2	3	2	2	2	2	2	2	2	2	2	2	2	0.243802	0.34	0.152778
LInD7-85	Chr07	22328220	23146519	3	2	3	3	4	3	4	3	2	3	1	3	3	3	4	3	4	2	3	3	3	3	0.541322	0.7	0
LInD7-88	Chr07	23096331	24007603	1	2	1	1	1	1	1	1	2	1	1	1	1	1	2	1	2	2	1	1	1	1	0.35124	0.5	0
LInD7-89	Chr07	24175482	25218396	1	2	1	1	1	1	1	1	2	1	2	1	1	1	1	1	2	2	1	2	1	2	0.433884	0.48	0.152778
LInD7-96	Chr07	25328139	26360137	2	2	1	2	1	2	1	2	1	2	2	2	2	2	2	2	2	2	2	2	2	2	0.297521	0.48	0
LInD7-107	Chr07	26153035	27193549	2	3	1	2	2	2	3	2	1	2	2	2	2	2	2	2	1	3	2	2	2	2	0.433884	0.66	0
LInD8-6	Chr08	932983	894305	1	1	2	1	1	1	1	1	1	1	1	1	1	1	2	3	1	1	1	1	1	1	0.243802	0.32	0.152778
LInD8-11	Chr08	2863050	2547720	2	2	1	2	1	2	2	2	2	2	1	2	2	2	1	2	1	2	2	1	2	2	0.396694	0.48	0
LInD8-14	Chr08	3867962	4138735	1	2	1	1	2	1	2	1	2	2	2	1	1	1	2	1	2	2	1	1	1	1	0.483471	0.32	0.152778
LInD8-25	Chr08	5004448	5446399	1	2	1	1	2	1	1	1	2	1	2	3	1	1	1	1	2	2	1	2	1	1	0.491736	0.42	0.152778
LInD8-29	Chr08	5690232	6486978	1	2	1	1	1	1	1	1	2	1	1	1	1	1	1	1	2	2	1	1	1	1	0.297521	0.48	0
LInD8-39	Chr08	6573386	7112414	2	1	2	2	2	2	2	2	1	1	2	2	2	2	1	2	2	1	2	1	2	2	0.396694	0.5	0.152778
LInD8-52	Chr08	7573318	7904229	3	3	2	3	1	3	3	3	3	3	1	3	3	3	3	3	0	3	3	3	3	3	0.318182	0.53	0
LInD8-60	Chr08	8121396	8389229	2	3	1	3	3	2	1	3	3	2	3	1	1	1	3	3	3	2	1	3	1	2	0.640496	0.46	0.652778
LInD8-62	Chr08	10998066	10873137	2	4	4	2	4	2	3	2	4	2	1	3	2	3	2	2	5	4	2	1	3	2	0.698347	0.68	0.375
LInD8-66	Chr08	15266748	14360043	1	2	1	2	1	1	2	1	2	1	1	2	1	0	1	2	1	2	2	2	2	2	0.541322	0.5	0.569444
LInD8-69	Chr08	16139642	14857315	2	2	1	2	2	2	2	1	1	2	1	2	2	2	1	1	2	2	2	2	2	2	0.396694	0.48	0.277778
LInD8-78	Chr08	17079585	15877190	1	3	2	2	1	4	3	3	3	3	3	3	4	1	2	2	1	3	4	4	2	4	0.731405	0.66	0.736111
LInD8-87	Chr08	17985222	16731874	2	2	1	2	2	2	1	2	2	2	2	1	2	2	1	2	1	1	0	2	2	1	0.491736	0.5	0.402778
LInD8-101	Chr08	18462121	17206784	1	1	2	1	2	1	2	1	2	1	1	2	1	1	1	1	2	2	1	2	1	1	0.46281	0.42	0.152778
LInD8-107	Chr08	19506187	18293909	1	2	1	1	1	1	1	1	0	0	1	1	1	1	2	1	1	0	1	1	1	1	0.376033	0.56	0.152778
LInD8-115	Chr08	20169050	18961976	1	1	2	1	2	1	1	1	1	1	1	1	1	1	1	1	1	1	1	2	1	1	0.235537	0.42	0
LInD8-116	Chr08	21168517	20296560	2	1	1	2	2	2	1	1	1	2	2	2	2	2	2	2	1	1	2	2	2	2	0.433884	0.48	0.152778
LInD8-119	Chr08	23978312	23016322	1	2	1	1	1	1	1	1	1	1	1	1	1	1	2	1	1	1	1	1	1	1	0.165289	0.32	0
LInD8-128	Chr08	25201510	24233857	1	1	2	1	2	1	2	1	2	1	1	1	1	1	1	1	1	2	1	1	1	1	0.35124	0.5	0
LInD8-131	Chr08	26278477	25193644	1	1	2	1	1	1	2	1	1	1	1	1	1	1	1	1	2	1	1	1	1	1	0.235537	0.42	0
LInD8-132	Chr08	26982218	25881838	1	1	4	4	4	3	4	4	4	3	1	1	4	3	2	0	2	2	3	4	2	2	0.747934	0.62	0.763889
LInD9-1	Chr09	83032	159934	2	2	1	2	1	2	1	2	1	2	1	2	2	2	1	2	0	1	1	1	2	2	0.533058	0.17	0.152778
LInD9-6	Chr09	721570	415714	1	1	2	1	1	1	2	1	1	1	1	1	1	1	1	1	2	2	1	1	0	0	0.429752	0.48	0.277778
LInD9-11	Chr09	1359694	1135531	2	2	1	2	1	2	1	0	0	0	1	2	2	2	2	2	1	1	2	1	0	0	0.640496	0.31	0.444444
LInD9-17	Chr09	2168973	1960592	2	2	1	2	1	2	1	2	1	2	1	2	2	2	1	2	1	1	2	1	2	2	0.483471	0.18	0
LInD9-25	Chr09	2825216	3008616	2	1	2	2	2	2	2	2	1	2	2	2	2	0	2	2	2	2	2	2	2	2	0.243802	0.32	0.152778
LInD9-33	Chr09	3541552	3888826	1	1	2	1	2	1	2	1	2	1	2	1	1	1	2	1	2	2	1	2	2	1	0.495868	0.18	0.152778
LInD9-39	Chr09	4280304	5006689	1	1	2	1	1	1	2	1	2	1	2	1	1	1	2	1	2	2	1	1	1	1	0.433884	0.42	0
LInD9-41	Chr09	5139951	5885362	1	1	2	1	1	1	2	1	1	1	2	1	1	1	1	1	1	1	1	1	1	1	0.235537	0.42	0
LInD9-49	Chr09	5691099	6899156	2	1	2	1	3	2	2	2	1	2	2	2	2	2	2	2	1	2	2	2	2	2	0.367769	0.54	0.152778
LInD9-58	Chr09	6367243	7543806	2	1	2	2	2	2	2	2	0	2	2	2	2	2	2	2	2	2	2	2	0	2	0.243802	0.31	0.152778
LInD9-66	Chr09	7084897	8541894	1	0	1	2	2	1	2	2	2	1	1	2	1	2	2	2	2	1	1	2	2	2	0.516529	0.47	0.486111
LInD9-73	Chr09	8486931	10648471	2	2	1	2	2	2	2	2	1	2	2	2	2	2	2	2	2	2	2	2	2	2	0.165289	0.32	0
LInD9-74	Chr09	8889085	11028822	1	1	2	1	1	1	1	1	2	1	1	1	2	1	1	1	2	1	1	1	1	1	0.297521	0.42	0.152778
LInD9-78	Chr09	9854290	11975249	0	2	1	2	1	2	2	2	1	2	0	2	0	2	0	2	0	0	0	1	2	2	0.615702	0.64	0.375
LInD9-81	Chr09	10125721	12191723	1	1	3	1	3	1	1	1	0	1	3	1	1	1	3	1	0	2	1	3	1	1	0.533058	0.66	0
LInD9-82	Chr09	12385148	14207397	2	0	0	1	3	2	0	2	3	2	1	1	2	3	3	1	0	0	2	3	1	0	0.747934	0.58	0.625
LInD9-83	Chr09	14120540	15877017	1	2	3	1	3	1	2	1	3	1	1	1	1	1	3	1	3	2	1	1	1	1	0.524793	0.62	0
LInD9-84	Chr09	14722254	16486834	1	2	2	1	1	1	2	1	0	0	1	1	1	1	2	1	2	2	1	1	1	1	0.512397	0.47	0.152778
LInD9-92	Chr09	16205094	17952904	2	2	2	2	2	2	2	1	2	1	2	2	2	2	1	2	2	2	2	2	2	2	0.235537	0.18	0.277778
LInD9-108	Chr09	16991126	18791435	2	2	2	2	1	2	1	2	1	2	1	2	2	2	1	2	1	2	2	1	2	2	0.433884	0.42	0
LInD9-123	Chr09	17739930	19518346	1	1	1	1	2	1	2	1	2	1	2	1	1	1	1	1	1	1	1	2	1	1	0.35124	0.5	0
LInD9-129	Chr09	18297794	20178535	4	4	2	3	2	4	2	1	2	0	2	4	4	1	2	0	1	4	4	2	4	1	0.72314	0.46	0.652778
LInD9-139	Chr09	18940462	20818678	2	1	2	2	2	2	1	2	1	2	2	2	2	2	2	2	2	1	2	2	2	2	0.297521	0.48	0
LInD9-141	Chr09	19388647	21528480	3	6	4	3	4	2	5	5	3	6	5	6	1	4	2	3	3	6	5	4	6	5	0.801653	0.78	0.791667
LInD9-145	Chr09	20120966	22217633	1	3	2	1	2	1	3	1	3	1	1	1	1	1	2	1	3	3	1	3	1	1	0.557851	0.54	0
LInD10-1	Chr10	300945	82985	1	1	2	1	0	1	2	1	1	1	1	1	1	2	1	1	0	1	1	1	2	2	0.475207	0.56	0.375
LInD10-2	Chr10	1109059	903775	1	1	2	2	2	1	2	1	2	1	1	1	1	2	2	1	2	2	1	2	1	1	0.495868	0.32	0.277778
LInD10-6	Chr10	2006233	1746871	2	1	2	2	2	2	1	2	2	2	2	2	2	2	2	2	1	2	2	2	2	2	0.235537	0.42	0
LInD10-11	Chr10	2444845	2253599	1	2	1	1	1	1	2	1	1	1	1	1	1	1	1	1	2	1	1	1	1	1	0.235537	0.42	0
LInD10-20	Chr10	4187856	3828907	2	1	1	3	0	2	1	1	1	2	1	1	2	1	1	3	3	1	2	2	3	3	0.665289	0.33	0.652778
LInD10-23	Chr10	5085611	4836192	2	1	2	2	1	2	2	2	2	2	1	2	2	2	2	2	1	2	2	1	2	2	0.35124	0.5	0
LInD10-29	Chr10	5912219	5459800	1	2	1	1	2	1	1	1	2	1	2	1	1	1	1	1	2	2	1	2	1	1	0.433884	0.42	0
LInD10-31	Chr10	6665303	6727432	4	3	2	4	0	1	2	4	3	4	0	0	4	4	3	2	3	3	0	0	2	3	0.764463	0.62	0.680556
LInD10-39	Chr10	7435411	8070809	1	1	2	1	2	1	2	1	2	1	0	1	1	1	1	2	1	1	1	2	2	2	0.516529	0.49	0.375
LInD10-43	Chr10	8132825	8689890	1	1	2	1	2	1	2	2	2	1	1	1	1	2	2	2	1	1	2	2	2	2	0.495868	0.48	0.5
LInD10-45	Chr10	9360883	9563253	1	1	2	1	2	1	2	2	2	2	2	2	2	2	2	2	1	1	2	2	2	2	0.396694	0.42	0.375
LInD10-49	Chr10	10023149	10550071	3	3	1	3	3	3	1	3	2	3	3	3	3	3	3	2	3	3	4	3	1	2	0.495868	0.46	0.513889
LInD10-53	Chr10	10922592	11215609	1	2	1	2	0	1	1	2	1	1	1	1	1	2	1	1	2	2	1	1	1	1	0.458678	0.41	0.375
LInD10-58	Chr10	11690204	11979889	2	3	3	1	2	2	3	1	2	2	2	1	2	2	2	2	1	1	2	2	2	2	0.524793	0.62	0.375
LInD10-61	Chr10	12344132	12629599	1	1	2	1	1	1	1	1	1	1	1	1	1	1	1	1	1	1	1	1	2	1	0.165289	0.18	0.152778
LInD10-64	Chr10	13686358	13894070	3	2	3	3	1	4	3	3	3	3	1	3	4	0	4	1	3	3	4	1	3	2	0.673554	0.64	0.666667
LInD10-72	Chr10	15090097	15220352	1	1	2	1	1	1	2	1	2	1	1	1	1	1	1	1	1	1	1	1	1	1	0.235537	0.42	0
LInD10-77	Chr10	16288792	16275320	0	2	1	1	1	2	2	2	2	0	1	1	2	2	1	1	2	1	0	1	1	1	0.599174	0.48	0.652778
LInD10-83	Chr10	17317402	17301649	1	2	1	1	2	0	2	0	1	1	2	1	1	1	1	0	1	1	1	2	0	1	0.566116	0.5	0.444444
LInD10-87	Chr10	18081664	17983134	0	1	0	2	2	2	1	2	1	2	2	2	2	1	2	2	1	1	2	2	2	2	0.512397	0.47	0.291667
LInD10-97	Chr10	18471691	18343673	2	1	2	2	1	2	1	2	1	2	1	2	2	1	1	2	1	1	2	1	2	2	0.495868	0.18	0.152778
LInD10-100	Chr10	19532514	19420758	2	1	2	2	2	2	1	2	1	2	2	2	2	2	2	2	1	2	2	2	2	2	0.297521	0.48	0
LInD10-104	Chr10	20707939	20532763	1	2	1	2	1	2	1	2	1	2	1	2	2	2	1	1	1	2	2	1	1	1	0.495868	0.32	0.444444
LInD10-112	Chr10	22177235	21873555	2	1	2	1	2	2	2	1	1	2	2	1	2	1	2	1	1	2	1	2	1	2	0.495868	0.42	0.486111
LInD10-120	Chr10	23023160	22732314	1	2	1	1	1	1	1	1	2	1	1	1	1	1	1	1	2	1	1	1	1	1	0.235537	0.42	0
LInD10-133	Chr10	23644623	23454265	1	1	2	1	2	1	2	1	2	1	1	1	1	1	2	1	2	2	1	2	1	1	0.46281	0.32	0
LInD11-2	Chr11	109595	173913	3	2	1	3	1	1	3	2	1	3	2	1	3	1	2	1	2	2	3	2	5	3	0.694215	0.54	0.625
LInD11-20	Chr11	2329554	2311051	1	2	1	1	1	1	1	1	1	1	2	1	1	1	1	1	1	2	1	1	1	1	0.235537	0.42	0
LInD11-30	Chr11	2830420	2814753	1	1	2	1	1	1	1	1	2	1	1	1	1	1	2	1	1	1	1	2	1	1	0.297521	0.48	0
LInD11-34	Chr11	3836379	3841661	1	0	2	1	2	1	2	1	2	1	2	1	1	1	2	2	1	0	1	2	1	2	0.57438	0.46	0.277778
LInD11-35	Chr11	5259837	5397346	1	2	2	1	2	1	2	2	2	1	1	3	1	1	2	1	2	2	1	2	1	1	0.541322	0.18	0.291667
LInD11-38	Chr11	6796636	6745805	4	3	2	3	2	3	2	3	6	5	3	4	4	4	2	3	3	3	4	3	4	1	0.719008	0.58	0.625
LInD11-50	Chr11	8587475	9229439	2	2	1	2	2	2	1	2	1	2	2	2	2	1	2	2	2	2	2	2	2	2	0.297521	0.42	0.152778
LInD11-46	Chr11	7761250	8262696	1	1	2	1	1	1	2	1	2	1	1	1	1	1	1	1	1	1	1	1	1	1	0.235537	0.42	0
LInD11-59	Chr11	9503896	10332324	1	2	1	1	1	1	1	1	1	1	1	1	1	1	1	1	2	1	1	1	1	1	0.165289	0.32	0
LInD11-71	Chr11	10417809	11325424	2	1	1	2	1	2	1	2	1	2	1	2	2	2	2	2	0	1	2	1	2	2	0.516529	0.17	0
LInD11-74	Chr11	11121902	12191910	2	1	2	2	2	2	2	2	2	2	2	2	2	2	1	2	1	2	1	1	1	1	0.433884	0.48	0.375
LInD11-91	Chr11	15575207	15611096	2	2	3	2	1	2	3	2	3	2	1	2	2	2	1	2	2	3	2	3	2	2	0.524793	0.62	0
LInD11-98	Chr11	16247042	16380627	2	0	2	3	1	3	2	3	2	3	1	3	3	3	1	3	1	2	3	1	3	3	0.644628	0.47	0.152778
LInD11-112	Chr11	18313754	18381894	3	2	2	3	3	3	3	3	3	3	3	3	3	3	3	3	2	3	1	3	3	3	0.309917	0.42	0.152778
LInD11-119	Chr11	19088927	19730426	1	2	1	2	0	1	2	1	0	1	2	1	1	1	2	1	1	0	2	2	1	1	0.582645	0.62	0.277778
LInD11-132	Chr11	19957928	20696544	2	1	2	1	2	2	1	1	2	2	1	2	2	2	1	2	1	2	1	2	2	2	0.46281	0.5	0.375
LInD11-143	Chr11	20973076	21797604	2	2	1	2	1	2	1	2	2	2	1	1	2	2	1	2	2	2	1	1	2	2	0.46281	0.48	0.277778
LInD11-148	Chr11	21754524	22782889	2	2	1	2	1	2	1	2	2	2	1	2	2	2	1	2	1	2	2	2	2	2	0.396694	0.48	0
LInD11-156	Chr11	22971997	23648627	1	1	0	1	0	1	2	1	2	1	1	1	1	1	1	1	1	1	1	1	1	1	0.31405	0.56	0
LInD11-161	Chr11	24098888	25048042	2	2	1	1	1	2	1	2	1	2	2	1	2	2	1	1	1	1	2	0	2	2	0.541322	0.31	0.375
LInD11-169	Chr11	24855730	25970240	2	2	1	1	1	2	1	1	1	2	1	2	2	1	1	1	1	1	2	1	0	1	0.491736	0.18	0.569444
LInD11-177	Chr11	25758206	26585957	2	1	2	2	1	2	1	2	1	2	2	0	2	1	2	2	1	1	2	2	0	1	0.561983	0.48	0.5
LInD11-180	Chr11	26629428	27876292	1	1	2	1	1	1	1	1	1	1	1	1	1	1	2	1	1	1	1	1	1	1	0.165289	0.32	0
LInD11-186	Chr11	27405298	30084477	3	2	3	2	3	1	3	1	3	3	2	3	1	3	3	3	3	2	1	2	3	3	0.566116	0.48	0.541667
LInD12-1	Chr12	242145	241487	2	2	1	2	2	2	1	2	2	2	2	2	2	2	1	2	0	2	1	2	2	1	0.417355	0.47	0.277778
LInD12-4	Chr12	1062915	961838	1	2	1	1	2	1	1	1	1	2	2	1	1	1	2	1	1	1	1	2	1	1	0.396694	0.5	0.152778
LInD12-11	Chr12	4274796	4077398	3	2	2	2	2	3	1	3	0	2	0	0	2	2	2	3	2	2	2	0	0	0	0.640496	0.54	0.652778
LInD12-13	Chr12	6020457	6056874	2	2	1	2	2	2	2	2	2	2	2	2	2	2	2	2	2	2	2	2	2	2	0.0867769	0.18	0
LInD12-17	Chr12	6812462	6791785	2	2	1	2	2	2	2	2	2	2	2	2	2	2	2	2	2	2	2	2	2	2	0.0867769	0.18	0
LInD12-20	Chr12	7459018	7561544	1	2	1	1	1	1	2	1	1	2	1	1	1	1	1	0	0	1	1	1	1	1	0.382231	0.31	0.291667
LInD12-24	Chr12	8396182	7922052	2	1	2	2	1	2	1	2	1	1	1	1	1	1	1	2	1	1	1	1	2	2	0.46281	0.18	0.486111
LInD12-34	Chr12	9050717	8557059	2	1	2	2	1	2	1	2	1	1	1	1	1	1	1	2	1	1	1	1	2	2	0.46281	0.18	0.486111
LInD12-42	Chr12	9991261	9439787	1	2	1	1	1	1	1	1	1	2	1	1	1	1	1	1	2	1	1	1	1	1	0.235537	0.32	0.152778
LInD12-61	Chr12	13274965	12930534	2	2	1	1	2	1	1	1	2	1	1	0	1	1	2	1	2	2	1	1	1	1	0.491736	0.48	0.291667
LInD12-82	Chr12	16400351	17551311	1	2	1	1	2	1	1	1	2	1	1	0	1	1	2	1	2	2	1	1	1	1	0.458678	0.48	0.152778
LInD12-86	Chr12	17103197	17997501	1	2	1	1	1	1	1	1	1	1	1	1	1	1	1	1	1	1	1	1	1	1	0.0867769	0.18	0
LInD12-87	Chr12	18012860	18888880	3	3	1	3	2	3	3	3	2	3	2	3	3	1	0	1	3	2	3	2	3	3	0.578512	0.61	0.277778
LInD12-94	Chr12	18765321	19757259	2	1	2	2	2	2	1	2	2	2	1	2	2	2	0	1	0	2	2	1	2	2	0.475207	0.64	0.152778
LInD12-98	Chr12	19765339	21160511	1	3	1	1	2	1	1	1	1	1	1	1	1	1	1	1	1	1	1	1	1	1	0.169421	0.34	0
LInD12-109	Chr12	20507138	22005979	1	2	1	1	2	1	3	1	3	1	2	1	1	1	3	1	1	1	1	2	1	1	0.483471	0.66	0
LInD12-124	Chr12	23485291	24669824	1	1	2	2	1	2	1	3	4	3	3	4	3	1	3	1	0	0	1	1	0	1	0.735537	0.74	0.722222
																										0.0867769	0	0
																										0.834711	0.84	0.791667
																										0.445293	0.448387	0.229864

## Sheet: 33 polymorphism markers 
Marker Name	Chromosome	Nipponbare Position	ZS97 Position	MH63 Position	Zhonghua11	Zhenhan97	Minghui63	Xizang2	N22	Nipponbare	9311	02428	Teqing	Taichung65	Chuan7	Haobuka	Wuyugeng	Gangye	H360	Zidao	Heimichut	Malaixizidao	Xiushui134	AUS449	Mitak	Cypress	PIC Value in all groups	PIC Value in Indica groups	PIC Value in Japonica groups
LInD1-623	Chr01	25132926	23310075	24359379	1	2	2	2	2	1	2	1	2	1	2	1	1	2	2	1	2	2	1	2	2	2	0.46281	0	0.444444
LInD1-848	Chr01	40195444	38094434	38568118	0	2	2	1	0	1	2	2	0	2	0	0	1	1	2	0	0	2	0	2	1	2	0.64876	0.48	0.652778
LInD2-500	Chr02	21750315	22421499	21412797	2	1	1	2	1	2	1	1	1	2	1	2	2	2	1	2	1	1	2	1	2	1	0.495868	0	0.277778
LInD2-571	Chr02	28563242	28243745	27806145	2	1	1	2	2	2	1	2	1	2	2	2	2	2	1	2	0	1	2	2	2	2	0.458678	0.54	0
LInD3-296	Chr03	7075252	7033472	6759510	2	1	1	2	3	2	1	2	3	2	3	2	2	2	3	2	1	1	2	3	3	2	0.623967	0.5	0.152778
LInD3-634	Chr03	31371037	29240072	32080676	1	2	2	1	2	1	2	1	2	1	2	1	1	1	2	1	2	1	1	2	1	1	0.483471	0.18	0
LInD4-117	Chr04	601992	589056	375247	3	2	3	3	2	1	2	3	0	0	3	3	1	3	3	3	3	3	1	0	1	3	0.632231	0.62	0.541667
LInD4-190	Chr04	10983235	9841789	9757390	3	2	2	1	2	1	2	1	0	1	2	1	1	1	2	1	2	3	1	2	2	2	0.615702	0.34	0.402778
LInD4-367	Chr04	29151080	25854174	26120465	1	2	2	3	1	1	1	3	1	2	2	3	2	3	1	2	1	1	2	2	3	2	0.64876	0.48	0.625
LInD4-461	Chr04	35404148	31947764	32263863	1	2	2	1	1	1	2	1	0	1	1	1	1	1	2	1	0	0	0	0	1	1	0.566116	0.64	0.152778
LInD5-261	Chr05	7396695	6608260	7135456	2	1	1	2	1	2	1	2	2	2	2	2	2	2	1	2	1	1	2	1	1	2	0.483471	0.32	0.152778
LInD5-283	Chr05	9478340	8575618	8759432	0	0	2	2	1	1	1	3	0	1	0	1	1	4	1	1	2	0	1	4	2	2	0.719008	0.7	0.666667
LInD5-287	Chr05	21420195	19724087	21209021	3	2	2	2	2	1	2	2	2	1	2	2	1	2	2	2	2	2	1	2	2	2	0.367769	0	0.541667
LInD5-424	Chr05	22602924	20734624	22370157	1	2	3	1	2	1	2	2	0	1	2	0	1	4	5	0	2	2	1	0	2	1	0.727273	0.58	0.597222
LInD5-507	Chr05	29579067	27219430	28729381	2	1	1	2	1	2	1	2	1	1	1	2	2	2	1	2	1	1	2	1	2	2	0.5	0	0.152778
LInD6-317	Chr06	13242077	10664485	12152400	1	1	1	2	1	2	1	2	1	1	1	1	2	2	1	1	1	1	2	1	1	2	0.433884	0	0.486111
LInD6-506	Chr06	26841980	24135105	25257870	2	1	1	2	2	2	2	2	1	1	2	2	2	2	2	2	0	1	0	2	2	2	0.475207	0.58	0.291667
LInD7-146	Chr07	3377693	2327796	2779471	1	2	2	1	3	1	2	1	2	2	3	1	1	3	4	1	2	2	1	2	1	3	0.665289	0.46	0.402778
LInD7-251	Chr07	12555835	11679911	11976699	2	1	1	2	1	2	1	2	2	2	1	2	2	2	2	2	1	1	2	1	2	2	0.46281	0.32	0
LInD7-273	Chr07	15657231	14012486	14712397	2	1	1	2	2	2	1	2	1	2	2	2	2	2	1	2	1	1	2	2	2	2	0.433884	0.42	0
LInD7-348	Chr07	21764121	20022945	20917211	1	2	2	1	0	1	2	1	2	1	0	1	1	1	2	1	2	2	1	2	1	1	0.561983	0.32	0
LInD8-134	Chr08	265384	111311	116821	2	1	1	2	2	2	3	2	3	2	2	2	2	2	3	2	3	1	2	2	2	2	0.483471	0.66	0
LInD8-159	Chr08	2128986	1932349	1690022	2	1	1	2	2	2	1	2	1	1	1	2	2	2	1	2	1	1	2	2	2	2	0.483471	0.32	0.152778
LInD8-246	Chr08	10624357	9158159	8915370	1	1	2	2	2	1	2	2	2	1	2	2	1	2	2	2	1	2	1	2	2	2	0.433884	0.32	0.486111
LInD8-274	Chr08	13969125	12653213	12410648	2	2	2	1	2	2	2	1	2	2	1	2	2	2	1	2	0	2	2	1	2	2	0.417355	0.54	0.277778
LInD9-347	Chr09	17610395	15578469	17296773	1	1	1	1	1	2	1	1	1	2	1	1	1	1	1	2	1	1	2	1	1	1	0.297521	0	0.444444
LInD10-265	Chr10	11977732	12242386	12527717	0	1	1	2	1	2	1	2	1	2	1	2	2	1	1	1	1	1	2	1	1	1	0.491736	0	0.541667
LInD10-275	Chr10	12479210	13019152	13290818	0	1	1	2	1	2	1	2	1	2	1	2	2	2	1	2	1	1	2	1	2	2	0.541322	0	0.152778
LInD10-420	Chr10	21759927	22418407	22114636	5	2	2	4	5	4	1	4	1	4	5	4	0	4	3	4	1	2	4	5	4	4	0.719008	0.72	0.291667
LInD11-208	Chr11	1525327	1499398	1538459	2	1	1	2	2	2	1	1	1	2	1	2	2	2	2	2	1	1	1	2	2	2	0.483471	0.42	0.277778
LInD12-167	Chr12	3697693	3467901	3348116	2	4	4	4	3	1	0	1	4	3	2	4	2	3	1	4	2	3	4	2	3	2	0.752066	0.76	0.736111
LInD12-276	Chr12	14727521	13167521	12884674	1	2	2	2	2	1	2	1	2	2	2	1	2	2	2	1	2	2	2	2	2	2	0.35124	0	0.486111
LInD12-356	Chr12	24307510	20546238	22054768	1	2	2	2	2	1	2	1	2	1	2	2	1	2	2	1	2	2	1	2	2	2	0.433884	0	0.486111
