# Supplementary material for: Development of Whole-Genome Agarose-Resolvable LInDel Markers in Rice
Source: Rice (N Y). 2020 Jan 6;13:1. doi: 10.1186/s12284-019-0361-3 (PMC6944724; doi:10.1186/s12284-019-0361-3)
Supplement: Supplementary file 9 — Additional file 9. The design of 55 breeding markers. [file 12284_2019_361_MOESM9_ESM.xlsx]

## Sheet: breeding markers
Gene Name	Breeding markers	Chromosome	Distance(marker to gene/QTL)	Marker classfication	gene position	Nip Position	ZS97 Position	MH63 position	Forward Primer	Reverse Primer	PCR Product	MSU locus	RAP-DB locus	Region of the gene (MSU 7.0)
Pia/PiCO39	LInD11-293	Chr11	~186 kb	closely linked	6546026	6359961	6451749	6394974	CTAGAGCGTACCCAAAACCCCA	GGAGCTAAGCAGATCTCCCAGG	347	LOC_Os11g11790-LOC_Os11g11810	Os11g0225100-Os11g0225300	6546026-6561687
Pib	LInD2-653	Chr2	~72 kb	closely linked	35109117	35036732	34312740	33711033	GGTCTTTCAGCGTTACTTGAGCC	GGAAAATGGAGCAAGCGCAGAA	320			35109117-35109965
Pid2		Chr6	Promoter	intragenic	17160330	17164704	14961677	16495878	TTCTCAGCCGTCGTCTCATC	ATCCGATTCTCCAGAACAAG	291	LOC_Os06g29810	Os06g0494100	17160330-17164662
Pi1/Pik-h/Pi54, Pik-p, Pik-m	LInD11-539	Chr11	~45 kb	closely linked	25263256	25308418	24689962	25805413	AGCAAGTGCCACATTGGATTGA	CTAGCTTGTTGTGAGCCACTGC	342	LOC_Os11g42010	Os11g0639100	25263256-25264276
Pish/Pi35	LInD1-746	Chr1	~ 23 kb	closely linked	33141127	33164496	31179450	31958205	AGATCGTGCACTACCGACAAGT	TCCCATTGCATGAGAGGTGGTT	339	LOC_Os01g57340	Os01g0782100	33141127-33145609
Pit		Chr1	Exon	intragenic	2682019	2670379	2606796	2548349	AACACAGGGAATTTGCGTGG	TACAGAGATTGGAAATTCTCC	305	LOC_Os01g05620	Os01g0149500	2682019-2684988
Pita	LInD12-232	Chr12	~170 kb	closely linked	10606359	10435629	9050722	8557160	CAGCCCGATTCTTTCCACCCTA	GCCCACTCCCTCAGTCTTGATT	347	LOC_Os12g18360	Os12g0281300	10606359-10612068
Pi5/Pi3, Pi-i	LInD9-236	Chr9	~114 kb	closely linked	9674695	9789396	10152450	10300386	ACATTGTGAAACGGAGGAAGCAC	GGTGAGGCTGACAAAGGAGTGA	317	LOC_Os09g15840	Os09g0327600	9674695-9674000
Piz/Pi2/Pi9/Piz-t/Pigm	LInD6-292	Chr6	~87 kb	closely linked	10387509	10474871	8172683	9502242	TTTTGGGGTTTTTCTCCGCTGG	CTCCCATGTGCTACGAGAGAGA	323	LOC_Os06g17900	Os06g0286700	10387509-10390465
Pi21		Chr4	Exon	intragenic	19835131	19836091	17386768	18048854	CAAGATCATCAAGGAGATCC	TTGGGCAGCACCACTGCCCG	350	LOC_Os04g32850	Os04g0401000	19835131-19836892
Pi25/Pid3	LInD6-313	Chr6	~91 kb	closely linked	13058027	12966803	10283734	11892318	CGTTATGGCAGGGAAGGAGGAT	GAGTTCGTCCCTCGTGTCTTGA	311	LOC_Os06g22460	Os06g0330100	13058027-13055162
Pi36	LInD8-171	Chr8	~80 kb	closely linked	2889065	2808652	2704624	2423260	TAGGGTAGTGTCGGGCTCTTCT	TGACTCATGAATCTGGCAGGGT	342	LOC_Os08g05440	Os08g0150150	2889065-2892003
Pi37	LInD1-746	Chr1	~48 kb	closely linked	33116117	33164496	31179450	31958205	AGATCGTGCACTACCGACAAGT	TCCCATTGCATGAGAGGTGGTT	339			33116117-33124371
Pi56	LInD9-236	Chr9	~12 kb	closely linked	9777618	9789396	8202284	10300386	ACATTGTGAAACGGAGGAAGCAC	GGTGAGGCTGACAAAGGAGTGA	317	LOC_Os09g16000	Os09g0328951	9777527-9780698
Bsr-d1	LInD3-463	Chr3	~145 kb	closely linked	18437090	18292569	17752916	18116096	GCTCCAGGCCAATTGGTTAACC	CATCTGCTGAATCGGCTGCAAA	315	LOC_Os03g32230		18437090-18435989
Xa1	LInD4-402	Chr4	~25 kb	closely linked	31638099	31612897	28344266	28666830	CATTTCATGCACACACAGCTGC	GGACAACGTATTGGGCAATGGG	318	LOC_Os04g53120	Os04g0622600	31638099-31644795
Xa4		Chr11	Intron	intragenic	28007026	28007026	27093076	29625719	TATTTTCTGCTGAACTGAGG	AAACAAATGTATTTGCTAGC	272
Xa5	LInD5-143	Chr5	Intron	closely linked	437010	438905	255817	246667	GCTTGTCTAGCTGGTGGTTCAA	GAGTGACCCAAAGGACCCCTAC	329	LOC_Os05g01710	Os05g0107700	437010-443270
Xa7	LInD6-515	Chr6	QTL uncloned	closely linked	27963796	27997864	25001964	26238876	AAGTTGTGGCCCGTCACTGATA	TTGGCATACAGAGTGAGGGTGG	327
Xa13	LInD8-432	Chr8	~11 kb	closely linked	26725898	26736967	25622549	24661882	AGAGTTTGGCTGGCACTACACA	GCAGCATATTCCCCGTTGCAAT	327	LOC_Os08g42350	Os08g0535200	26725898-26728795
Xa21	LInD11-481	Chr11	~6 kb	closely linked	20799831	20805509	20735304	21467588	ACTCCGGTTGTGATTTTGCCTT	AGGCTTAATAAATTCGTCTCGCAGT	308	LOC_Os11g35500	Os11g0559200	20802924-20806518
Xa23	LInD11-496	Chr11	~51 kb	closely linked	22203734	22255145	21754430	22782867	GGTCGTCGTCTCGTCAACTTTT	GCAACTAGCTCCTCTGTCCCAT	302	LOC_Os11g37620		22203734-22204676
Xa27	LInD6-444	Chr6	~65 kb	closely linked	23654303	23719348	21236216	22384477	CTGTCATTGTGAGTGTGGCGAC	ATAAGGTGATGGGCTAGCCGAC	324	LOC_Os06g39810		23654303-23653851
Bph3	LInD4-169	Chr4	Exon	closely linked	6966603	6969116	6161442	5782162	CAGGATGGGCAAGAACAGGAGA	CGGTAGGAAAGACCAGCAAGGA	329	LOC_Os04g12540-LOC_Os04g12580	Os04g0202500	6966603-6969039
Bph6	LInD4-282	Chr4	~60 kb	closely linked		21288208	18600719	19295143	GCTCTTAACCAACCGATGACGC	GTGGGCAAGGGAAGCTATGGTA	327
Bph14	LInD3-694	Chr3	~79 kb	closely linked	35693286	35614788	33060958	36214700	GCGTGATTGGAAGCGACTTTCA	TTTGAACATGATGTCCCGCCAC	347	LOC_Os03g63150	Os03g0848700	35693286-35699010
Bph15	LInD4-168	Chr4	QTL uncloned	closely linked	6938639	6938639	6130905	5757125	TTCGTTTGGCATGTGTACCAGC	ACCCTTCCAGGCACATGTTACA	322
Bph25	LInD6-166	Chr6	QTL uncloned	closely linked	214278	215094	80089	105835	ACAGGTTCCGCTCTAAACACCA	AATGCTCAGCAGCCTGTACTGT	337
GS3	LInD3-449	Chr3	~24 kb	closely linked	16729501	16705038	16438969	16437583	TCTGTCTTTGCGGTTTCTGAGGA	ATGCTTCAAGTGACTGACGTGT	340	none	Os03g0407400	16729501-16735109
TGW3	LInD3-688	Chr3	~2k	closely linked	35385782	35384206	32835953	35986652	TTGAAATTCTCCCCCAGGGACC	GTGTTGTGCTTTGCCTGCAATG	337	LOC_Os03g62500	Os03g0841800	35385782-35392062
GS5	LInD5-199	Chr5	~93 kb	closely linked	3439210	3346176	2824677	3150310	GCATCATGCAAACACACACCTT	TATGCAGTTGCGCACAATGTCC	302	LOC_Os05g06660	Os05g0158500	3439210-3443769
GW2	LInD2-306	Chr2	~71 kb	closely linked	8114961	8186046	8372602	8103931	TCCTGCTAACAAGAAGATCGAACA	TTTGTTTGTTTTGGGACGGGGG	347	LOC_Os02g14720	Os02g0244100	8114961-8121925
GW5/qSW5	LInD5-225	Chr5	~8 kb	closely linked	5365122	5373669	4611575	5244175	GTTTTACATGTCACCAGGCCCG	CGGCCATTCGTTGTGGTAACTT	322	LOC_Os05g09520	Os05g0187500	5365122-5366701
TGW6	LInD6-474	Chr6	~51 kb	closely linked	25093242	25144513	22588121	23790622	TGCCTAATTCTGCCCTTGCCTA	AGTAGTCGTACTCCTCGTCCGC	340	LOC_Os06g41850	Os06g0623700	25093242-25094294
GW8	LInD8-431	Chr8	~ 4kb	closely linked	26501167	26497184	25461939	24494458	TGACCTCCGCTTCGCAGAAATA	CCGACCATAGACGTACGGATCC	318	LOC_Os08g41940	Os08g0531600	26501167-26506218
GL7/GW7		Chr7	Intron	intragenic	24664168	24668819	22823186	23734603	ATGTCAGCTGCGTCTCAAGC	TCTGAAAGGACTTGTCTCTCG	262	LOC_Os07g41200	Os07g0603300	24664168-24669324
Gn1a		Chr1	Intron	intragenic	5270103	5273742	5103987	4692367	GAGAGTTAATCCGCGAGACG	TGATAGCGAGAGGTGCATCG	331	LOC_Os01g10110	Os01g0197700	5270103-5275678
SD1		Chr1	Exon	intragenic	38382382	38383636	36223922	36702441	ATGGAATGCCCCACTCCTCC	CGGAAAATATTCTCATGTCG	334	LOC_Os01g66100	Os01g0883800	38382382-38385504
IPA1	LInD8-417	Chr8	~58 kb	closely linked	25274449	25332256	24312019	23395261	CGTCTTATAACCTAAAACGGAGGGA	GGAAGGCCTATGCAATGAAGGA	350	LOC_Os08g39890	Os08g0509600	25274449-25278696
DEP1		Chr9	Intron	intragenic	16411151	16413751	14259918	16021367	CCAACTAGTACTTTTACAATAC	AGGACGTCATACTACTGTTC	364	LOC_Os09g26999	Os09g0441900	16411151-16415862
Ghd7	LInD7-221	Chr7	~37 kb	closely linked	9152402	9190119	8070385	8763714	CTGGCTGATACTGATGGTCGGA	ATATGGGAACGCCTCTGCTCAC	312	LOC_Os07g15770	Os07g0261200	9152402-9155185
Ghd7.1	LInD7-465	Chr7	~206 kb	closely linked	29616705	29409990	27245825	28276524	TGGGATTGGGATTGTTGTCTTGAC	GCAAAAGAGGGGAGGTTAGTGC	315	LOC_Os07g49460	Os07g0695100	29616705-29629223
Ghd8	LInD8-177	Chr8	~39 kb	closely linked	4333717	4294755	3466477	3758758	CTTAGCTTTGCTGCTGCTCGTT	AGTTATGGCCTGCTCATTAGAACG	302	LOC_Os08g07740	Os08g0174500	4333717-4335434
Hd1	LInD6-281	Chr6	~26 kb	closely linked	9336359	9309766	7215540	8541555	CCTCGCAGAATCAAATTCGGGG	AGTATTTCGTTGCAGTTTGATCCCA	329	LOC_Os06g16370	Os06g0275000	9336359-9338643
NRT1.1B	LInD10-420	Chr10	~2k	closely linked	21762202	21759927	22418407	22114636	GGTATAGTAGGCGCGTGCAAAC	AACTAGCAGAGCCCTGAACCTG	325	LOC_Os10g40600	Os10g0554200	21762202-21757768
ARE1	LInD8-207	Chr8	~2k	closely linked	7568532	7566660	6278910	6813355	CAAAGGACCCAAGCGTCAAACA	CATAGGCTGCGTTCGAATGTCC	307	LOC_Os08g12780	Os08g0224300	7568532-7573950
GRF4/GS2	LInD2-572	Chr2	~8 kb	closely linked	28863173	28871920	28359911	28119916	TGACACGGTGAAAATTGCAGCC	CTGCAGCACGGACTCTAAGACA	304	LOC_Os02g47280	Os02g0701300	28863173-28866997
GIF1	LInD4-272	Chr4	Promoter	closely linked	20422171	20421884	18041133	18711709	TAAGCCACGAGAAGGAGCAGTG	TCCGTGACCTGCATGTTTCTCT	349	LOC_Os04g33740	Os04g0413500	20422171-20427062
TAC1	LInD9-408	Chr9	~11 kb	closely linked	20734724	20728539	18497684	20367669	CTACATGCCGGGATCCTATCGG	TACTATTCACACCCCACGTCGG	305	LOC_Os09g35980	Os09g0529300	20734724-20731589
Chalk5	LInD5-199	Chr5	~6 kb	closely linked	3339817	3346176	2824677	3150310	GCATCATGCAAACACACACCTT	TATGCAGTTGCGCACAATGTCC	302	LOC_Os05g06480	Os05g0156900	3339817-3335248
Wxb	LInD6-193	Chr6	~18 kb	closely linked	1765622	1748063	1313007	1472713	TTCGTGACCTAACTGAACCGCT	GCCTGTAAACTGCGAGACGAAT	305	LOC_Os06g04200	Os06g0133000	1765622-1770656
FZP		Chr7	Promoter	intragenic	28301089	28306448	25999059	27039530	TAGTTGAGTACAAAGCGAGA	GCACGAGAGACTTGTACACC	321	LOC_Os07g47330	Os07g0669500	28301089-28299591
CTB4a	LInD4-133	Chr4	~9 kb	closely linked	2034450	2024998	1631515	1747433	GGACTCGTAATGCAGAGGACCC	GAATGCCCACCCATGACAGAAG	349	LOC_Os04g04330	Os04g0132500	2034450-2038826
COLD1	LInD4-379	Chr4	~22 kb	closely linked	30316303	30294509	26913250	27348014	TCGAGCAAGTCTAGAAGAACAAGGT	AGAGCAGGTACAATAGCAGGCT	346	LOC_Os04g51180	Os04g0600800	30316303-30311519
TT1	LInD3-433	Chr3	~20 kb	closely linked	15420148	15440568	15260994	15297630	CGCGAGCCAATGGATGAAATGA	GGGACGGAGGGATACATATTAATCC	323	LOC_Os03g26970	Os03g0387100	15420148-15424724
